# Supplementary material
Source: publisher figshare collection journal article supplement (https://gsapubs.figshare.com/articles/dataset/_/12532547)
Supplement: Supplementary file 1 [file 1]

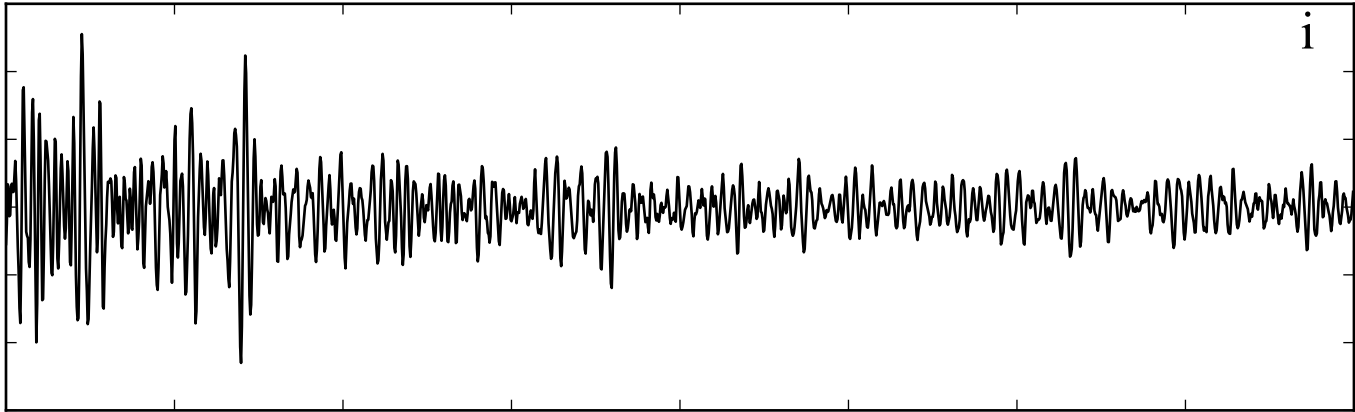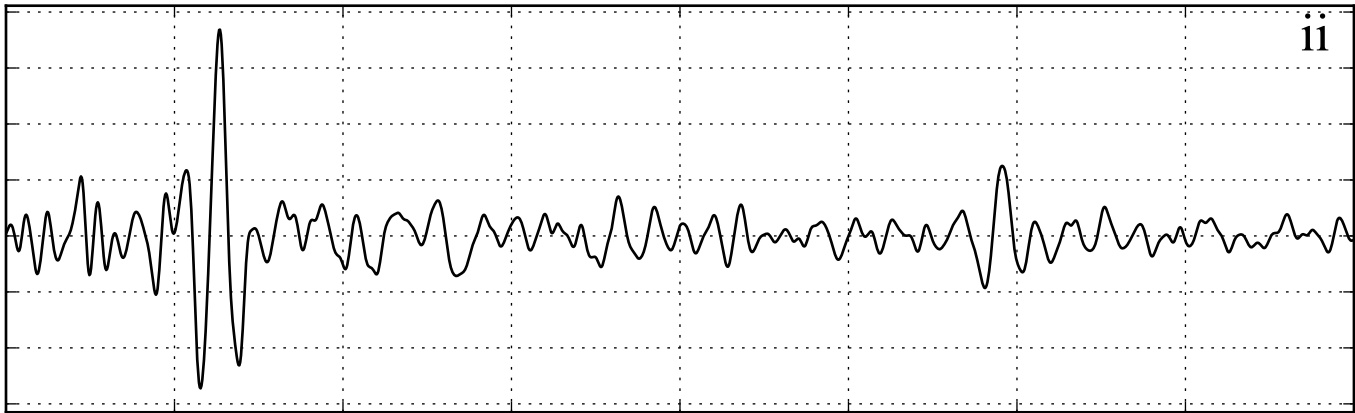

Time [s]

IU - ADK - - LHN  $\Delta/Az/Baz = 2.8^\circ/75^\circ/258^\circ$   $Srp=0.70$   
1997.351.04.33.51.203.IU.ADK..LHN.SAC (1997/12/17)  
 $ScS_2-ScS_1$  travel time: 931.4  $\tau$ : 42.8 s  
Centroid: 51.250 178.920 22.0 km Mw 6.6  
 $Q = 178$   $t^* = 5.2$  s  
Quality control: signal/noise  $ScS_1$ : 10.74  $ScS_2$  3.66 Correlation : 0.906

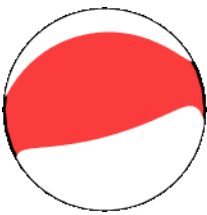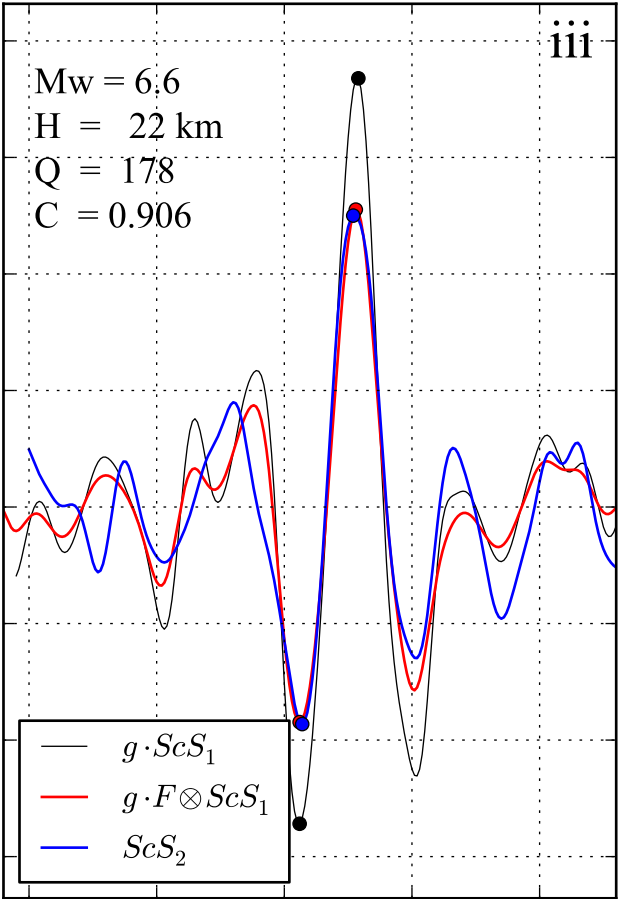

Time [s]

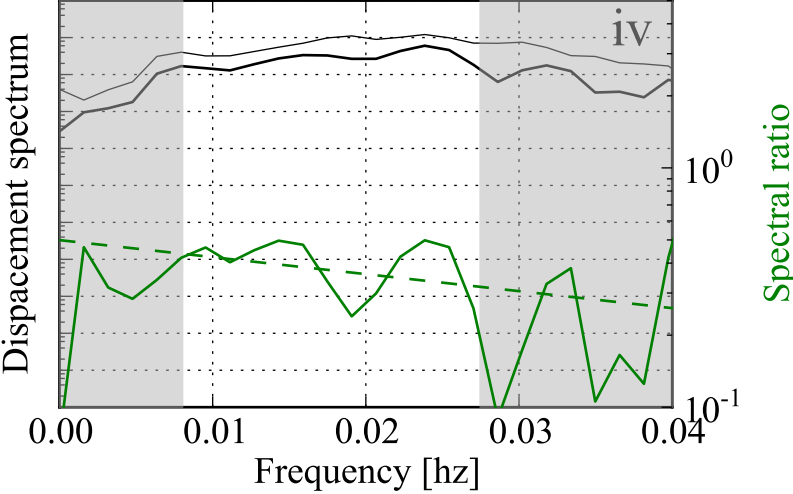

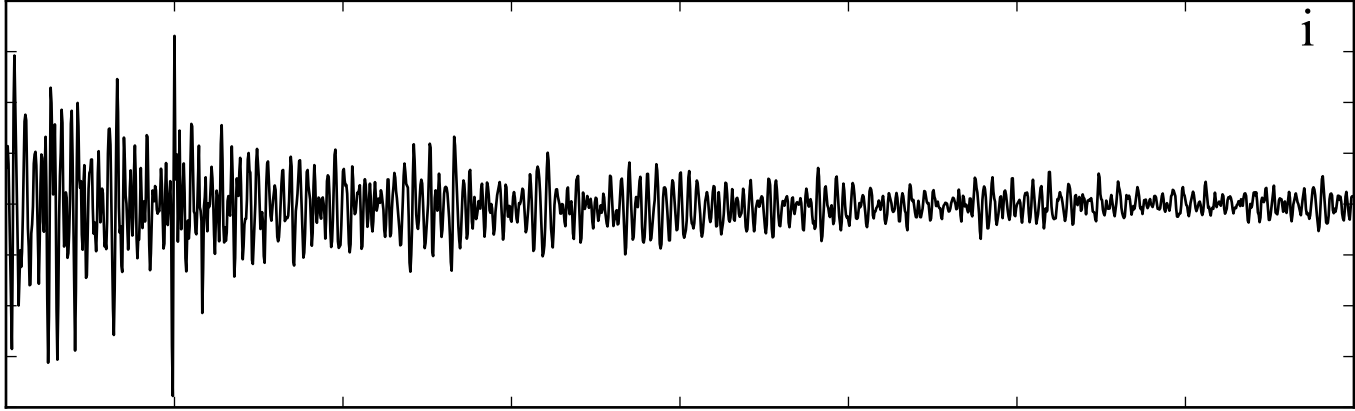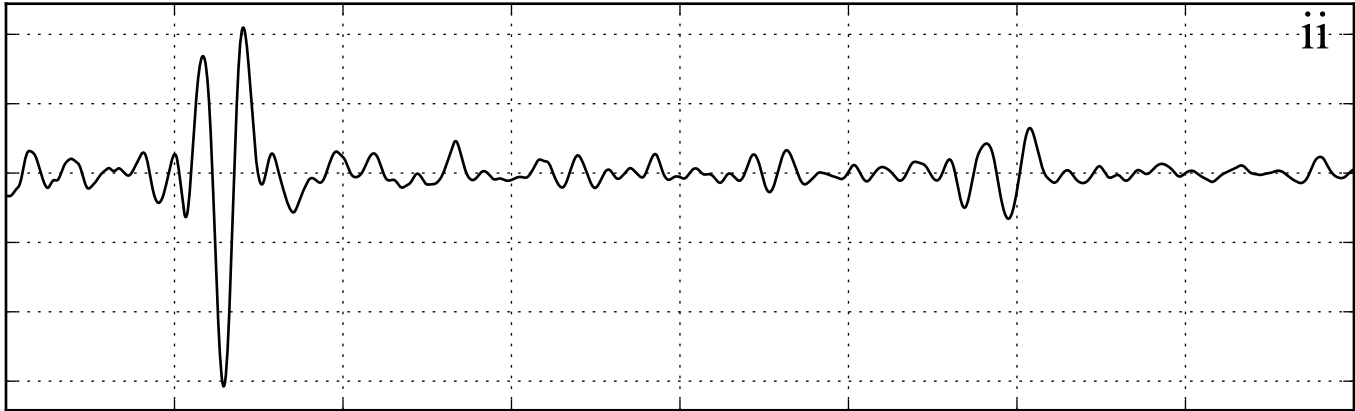

Time [s]

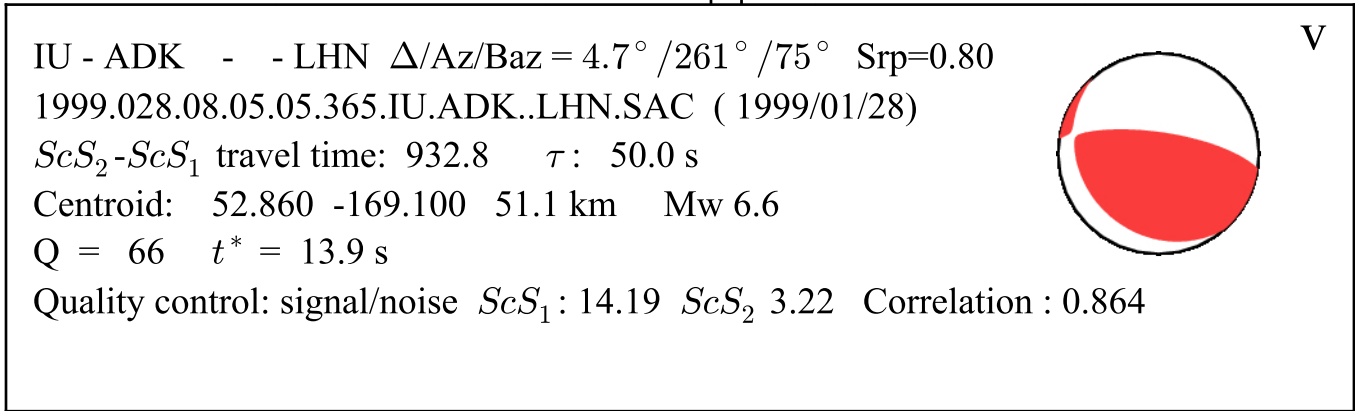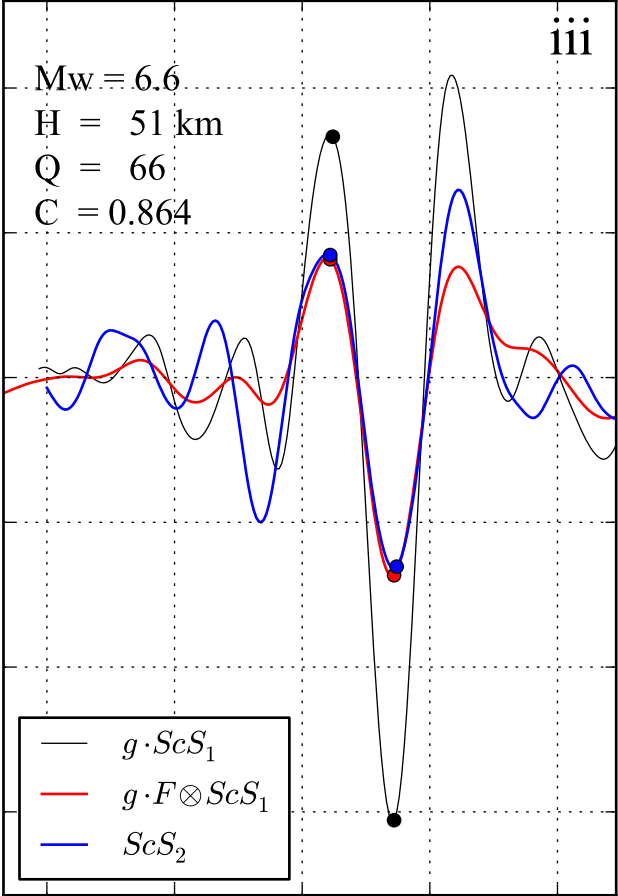

Time [s]

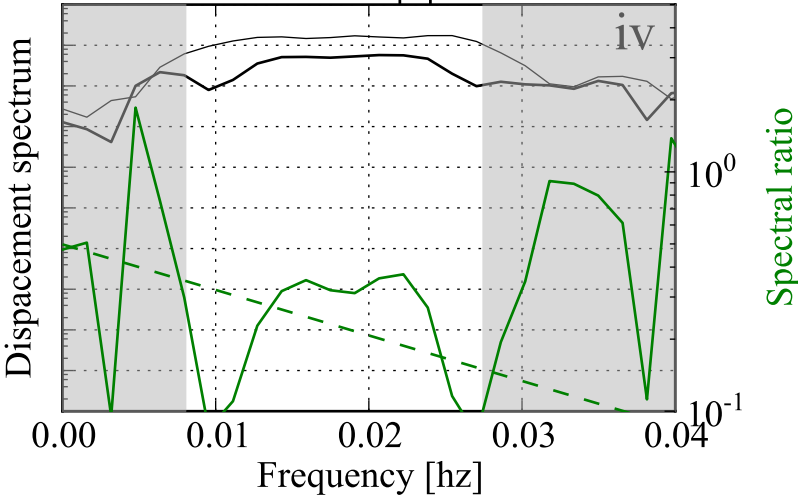

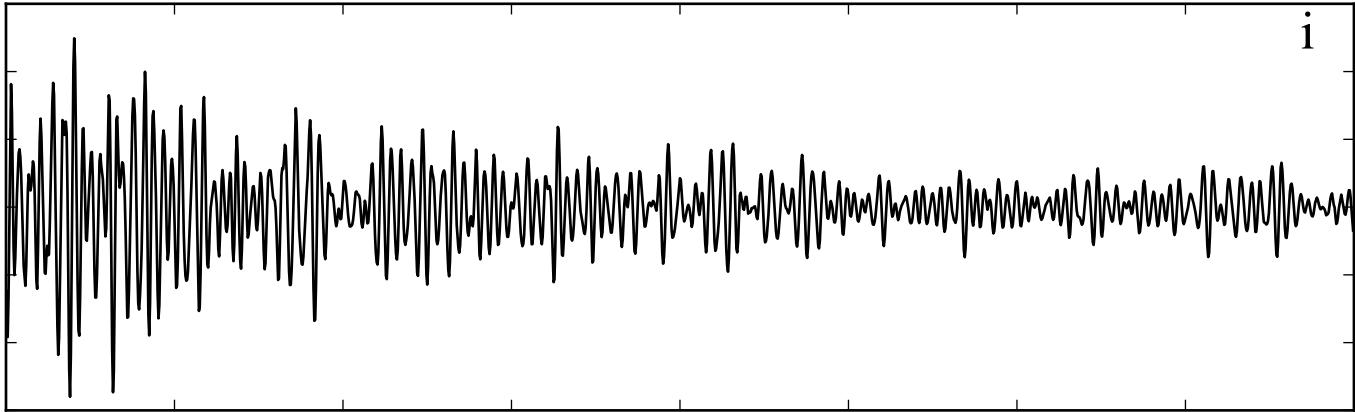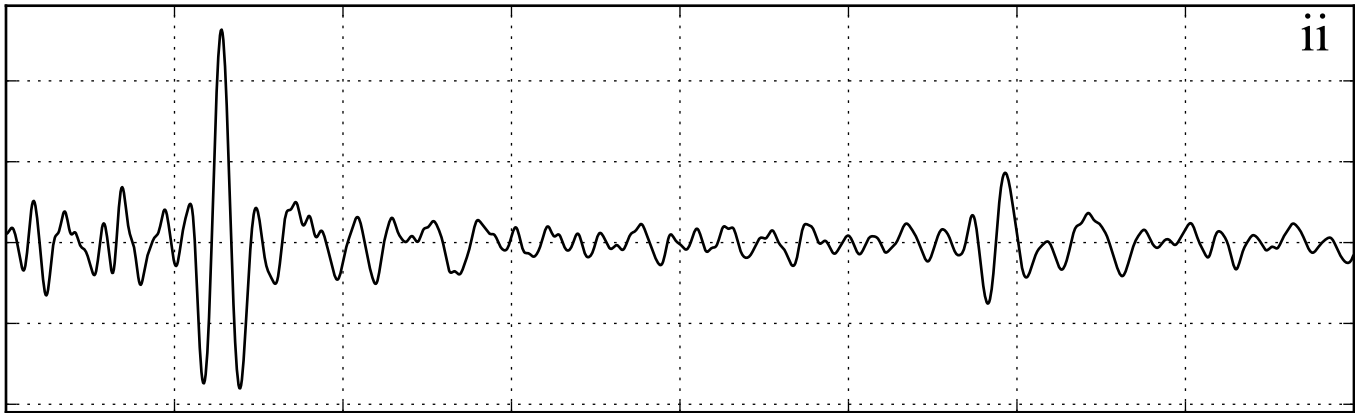

Time [s]

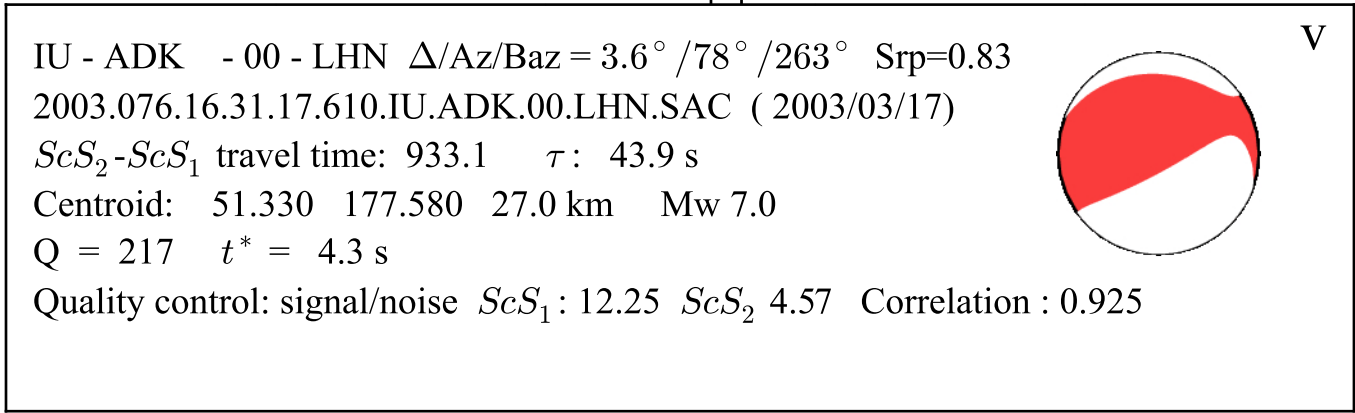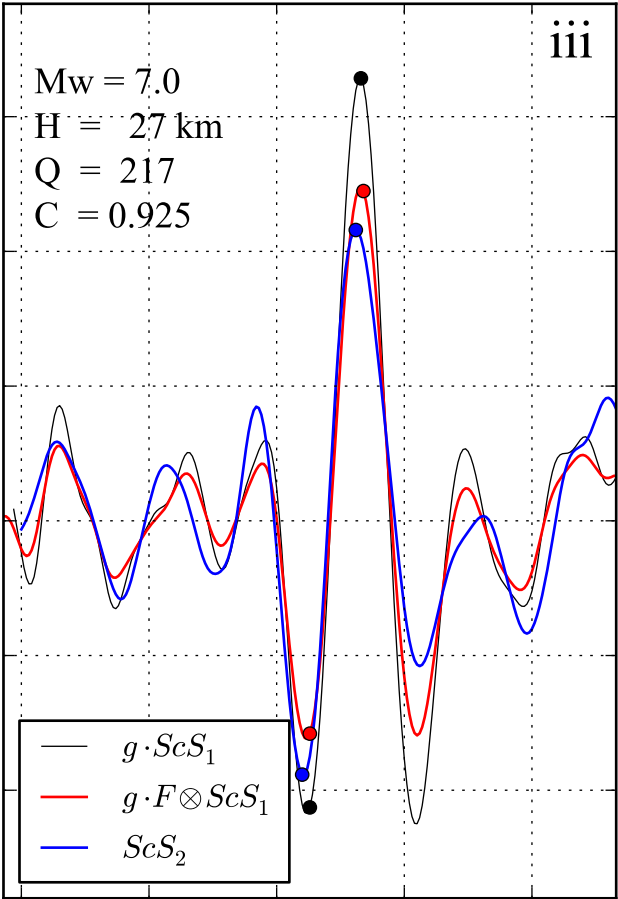

Time [s]

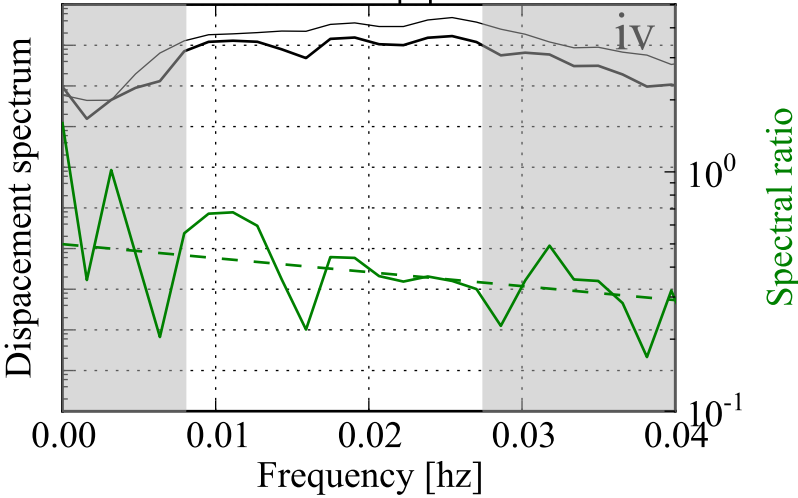

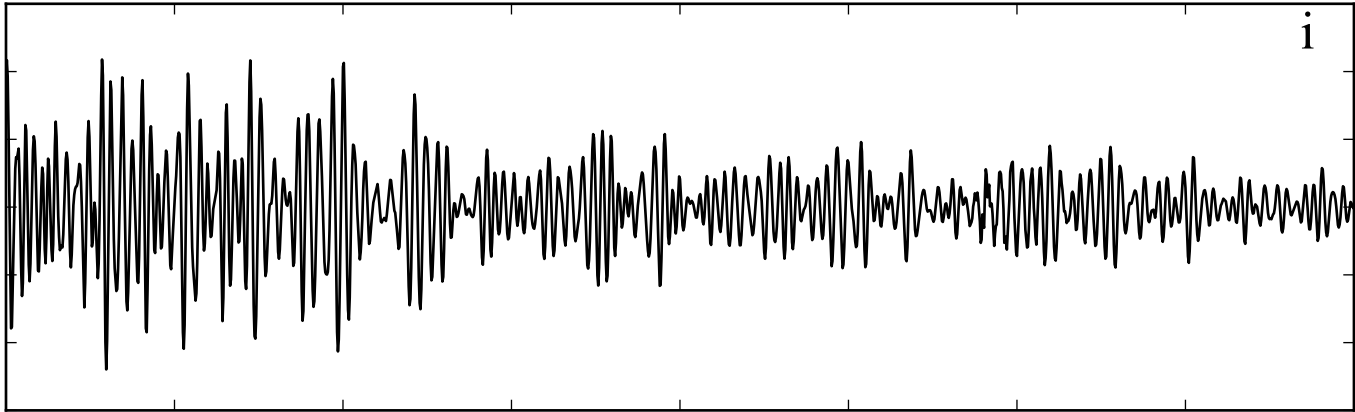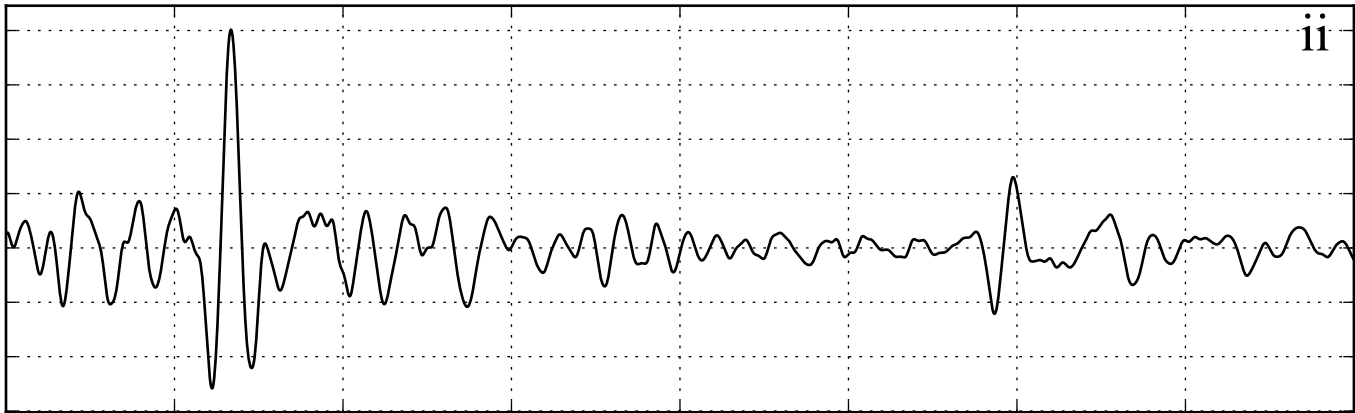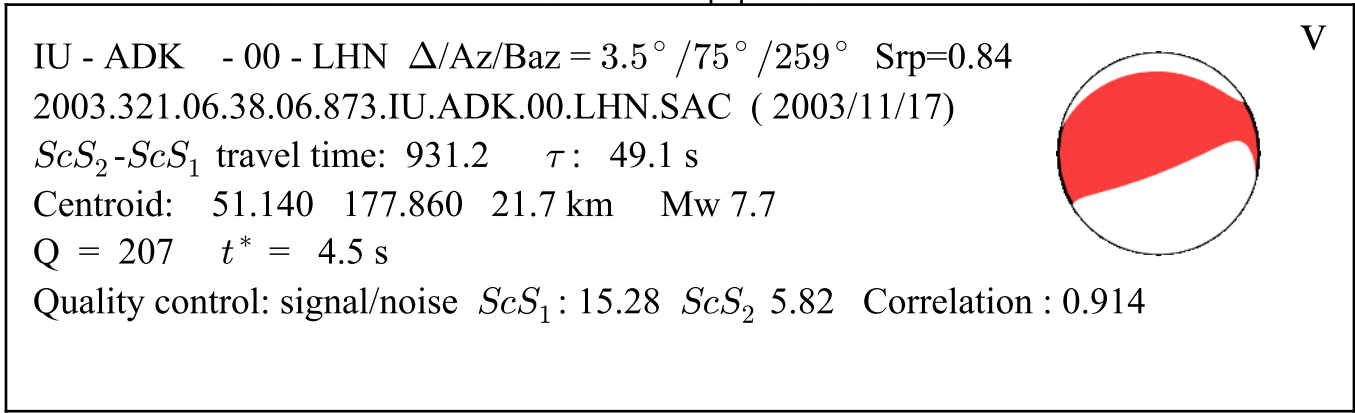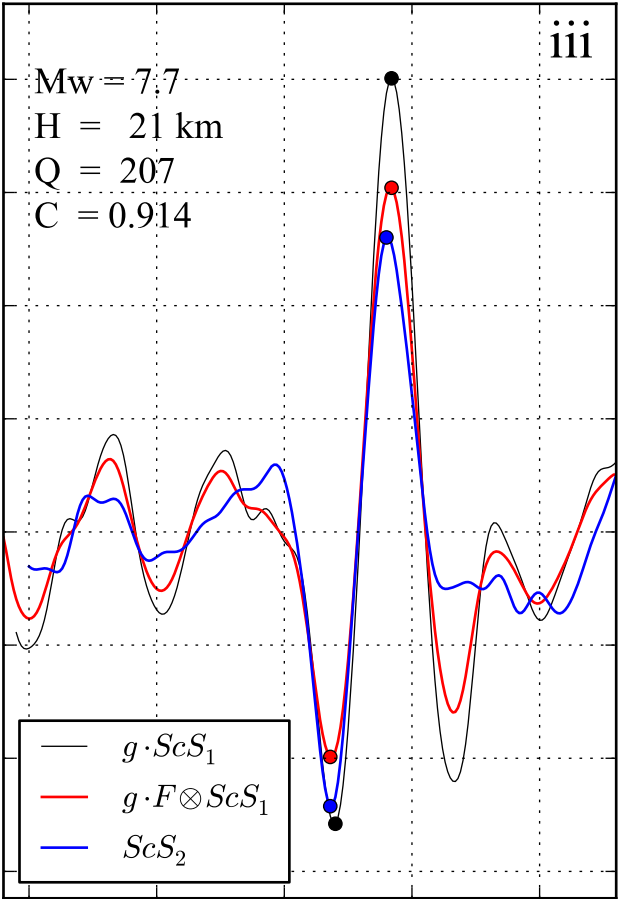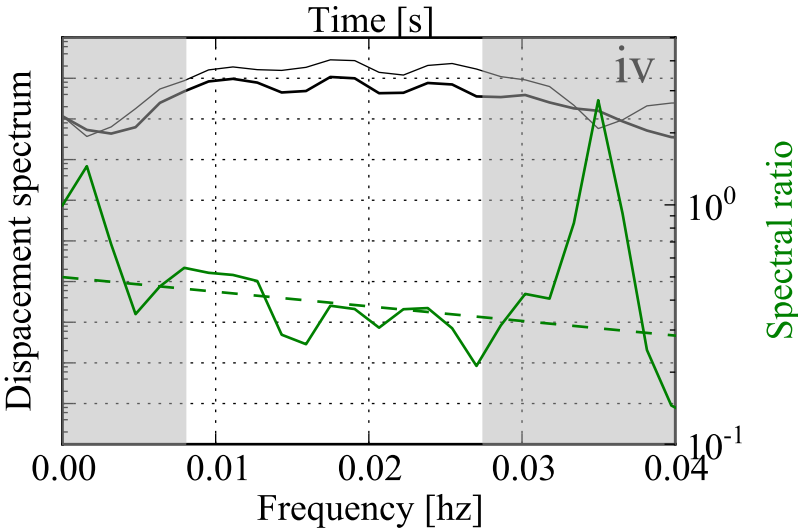



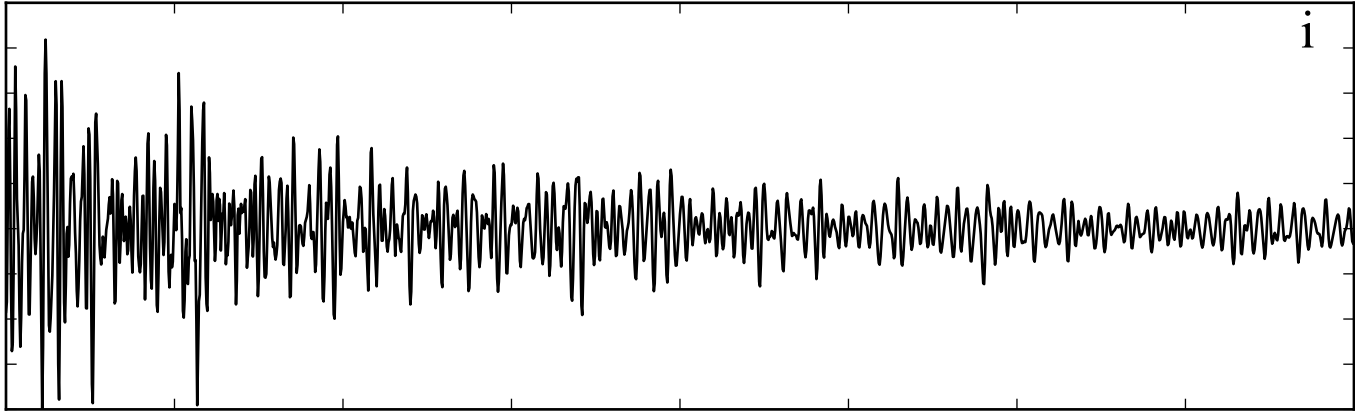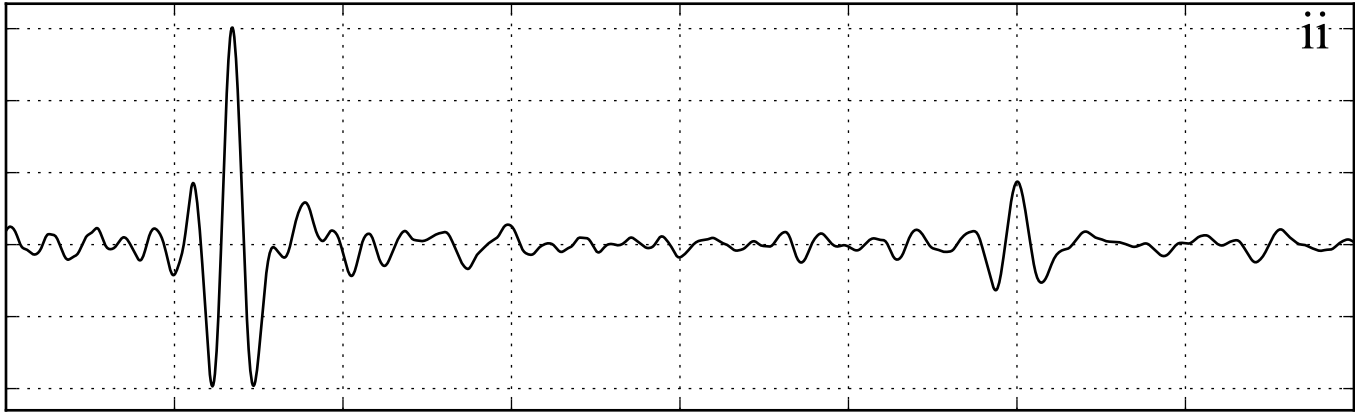

Time [s]

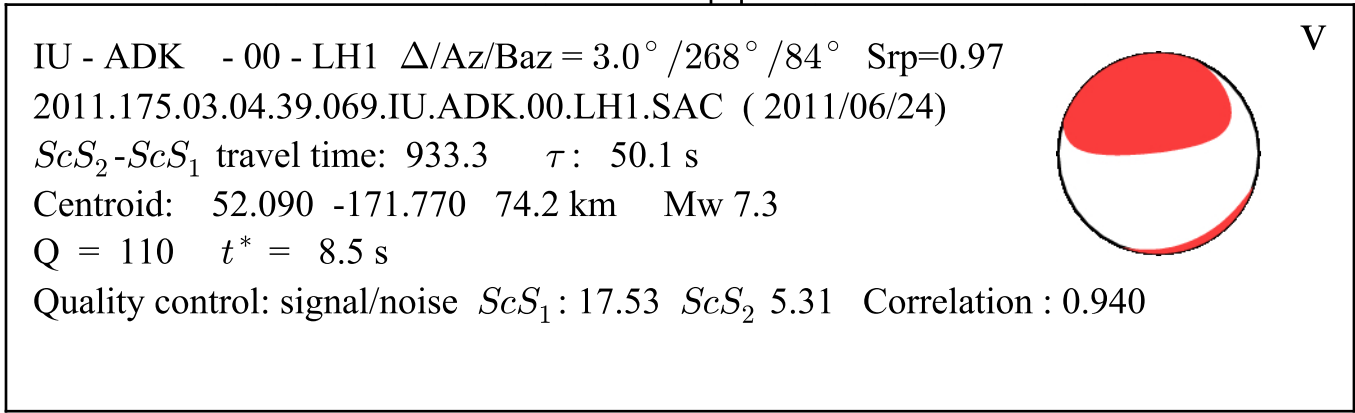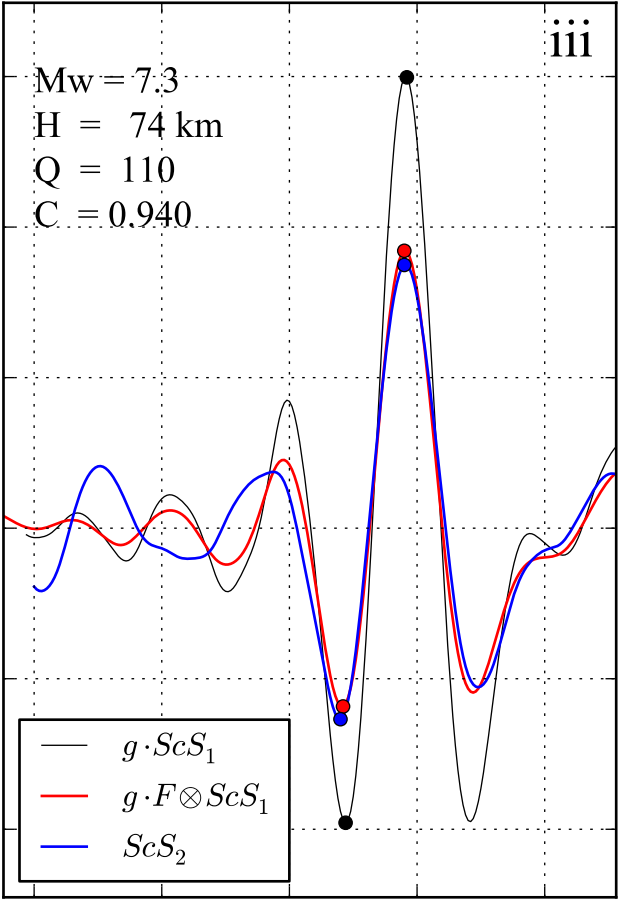

Time [s]

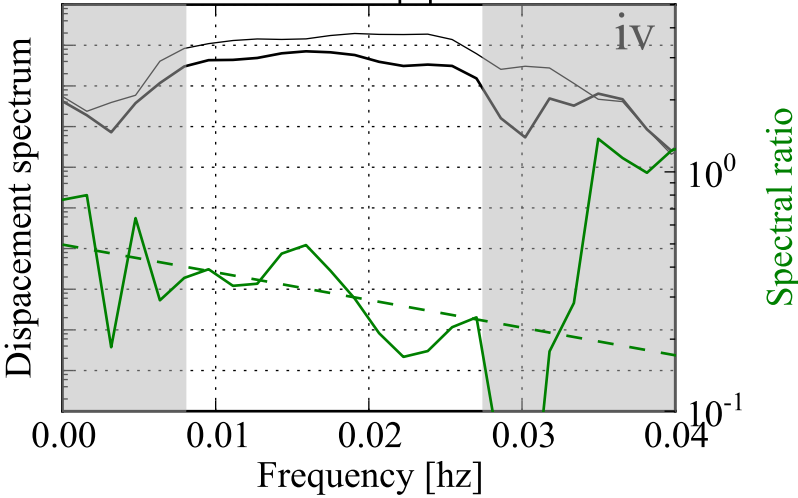

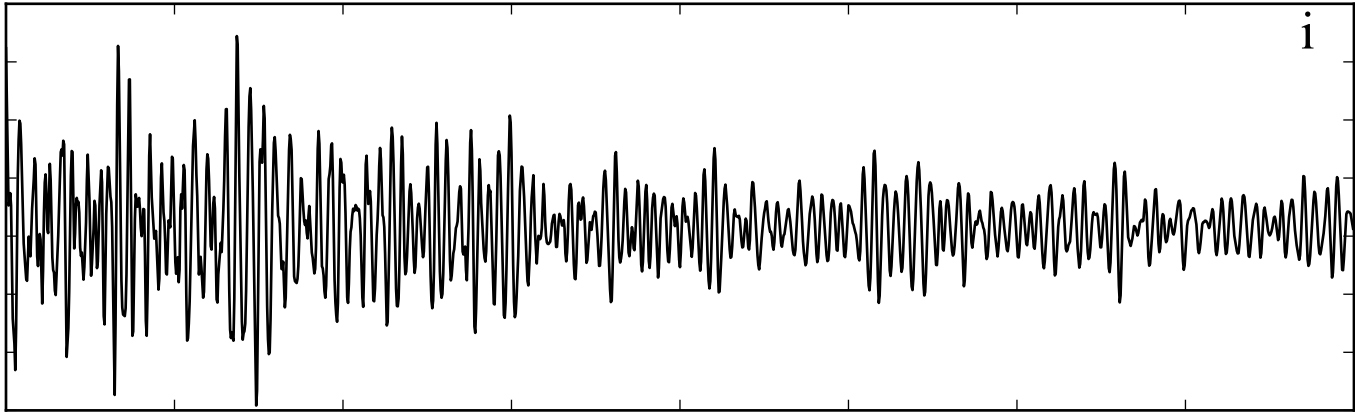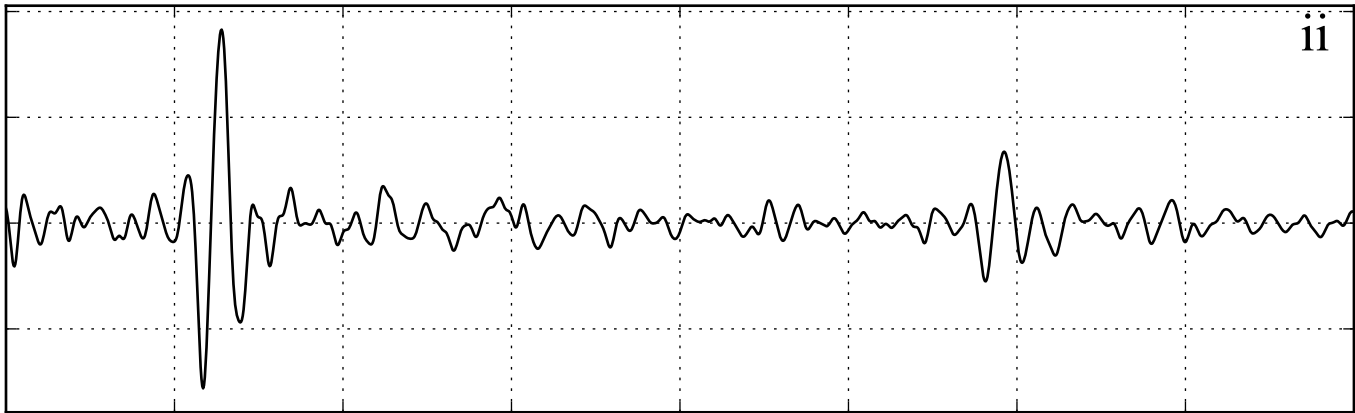

Time [s]

IU - ADK - 00 - LH1  $\Delta/Az/Baz = 1.1^\circ/295^\circ/113^\circ$  Srp=0.69  
2013.242.16.20.02.069.IU.ADK.00.LH1.SAC ( 2013/08/30)  
 $ScS_2-ScS_1$  travel time: 929.7  $\tau$ : 43.0 s  
Centroid: 51.440 -175.120 26.7 km Mw 7.0  
 $Q = 200$   $t^* = 4.6$  s  
Quality control: signal/noise  $ScS_1$ : 15.93  $ScS_2$  5.75 Correlation : 0.950

v

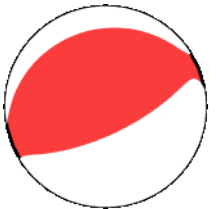

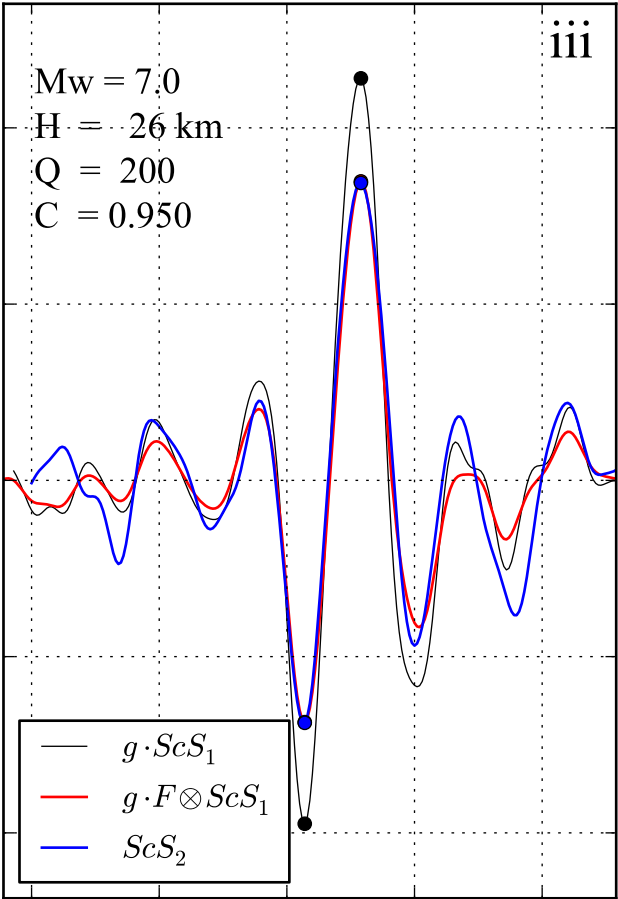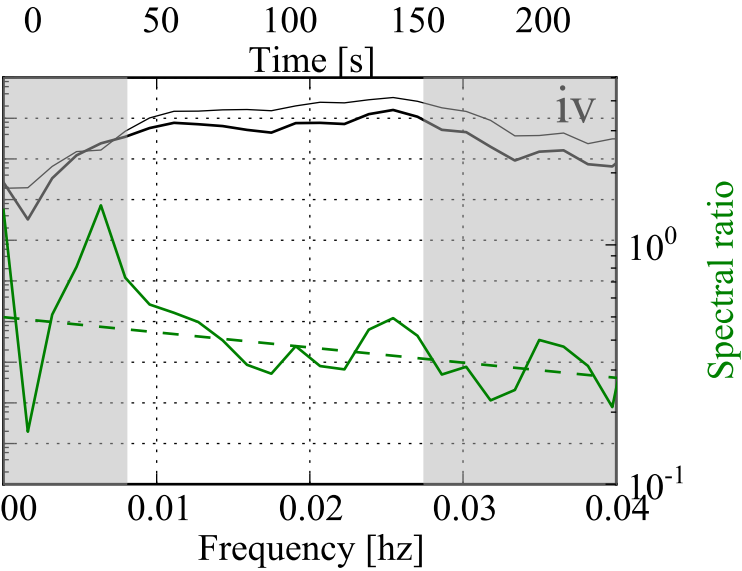

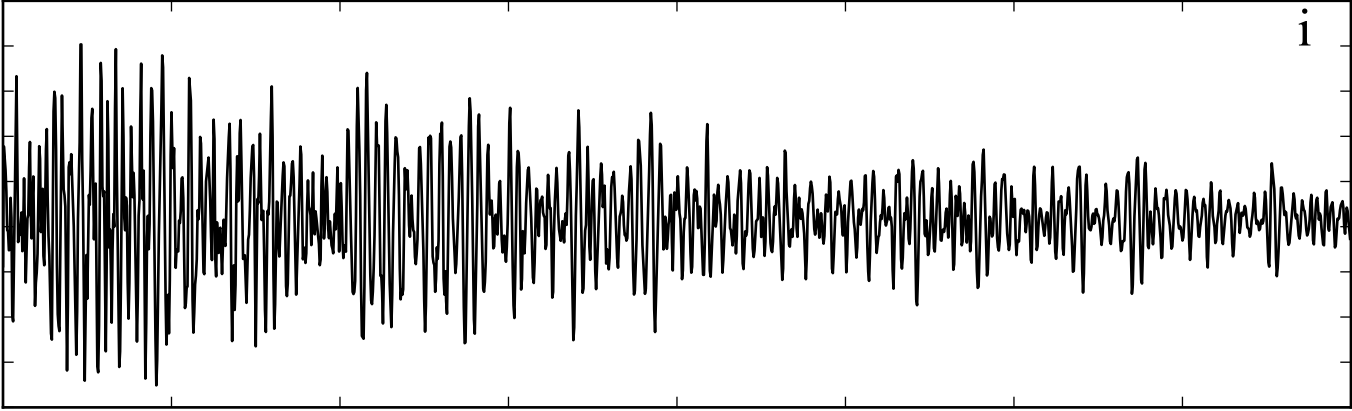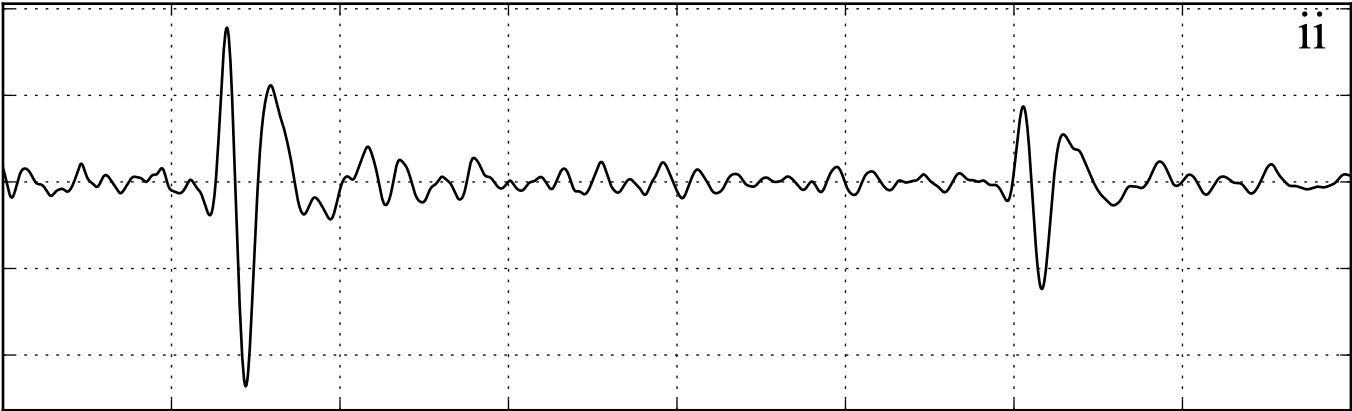

Time [s]

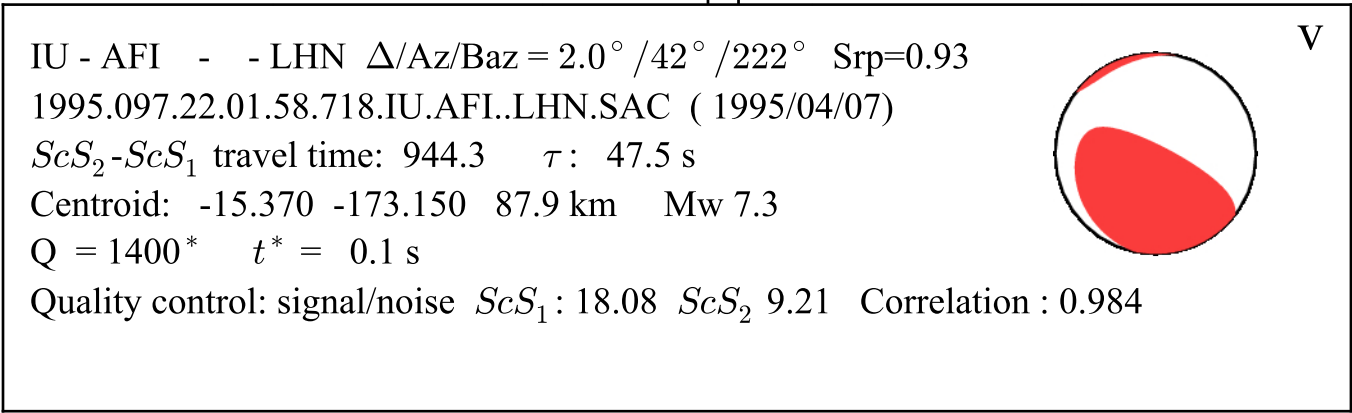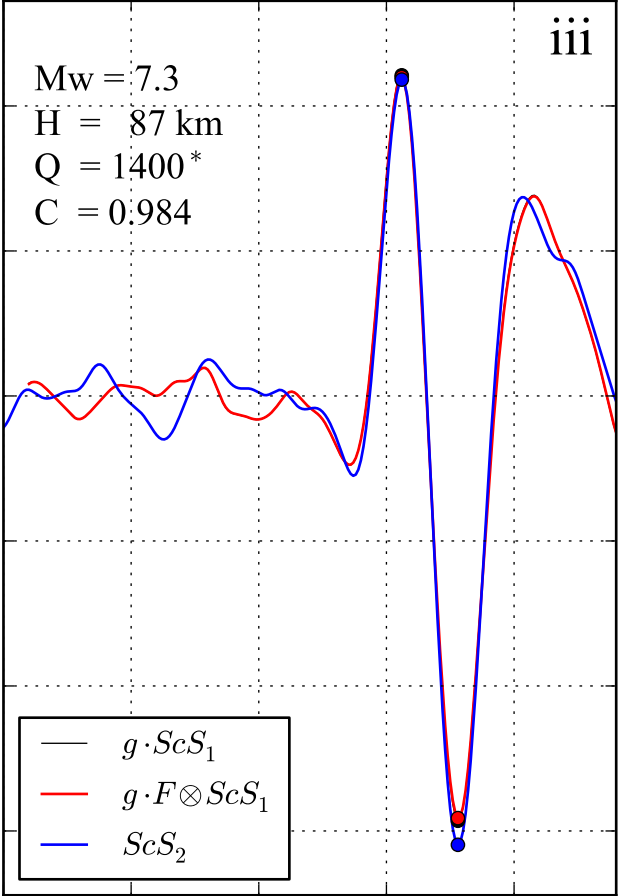

Time [s]

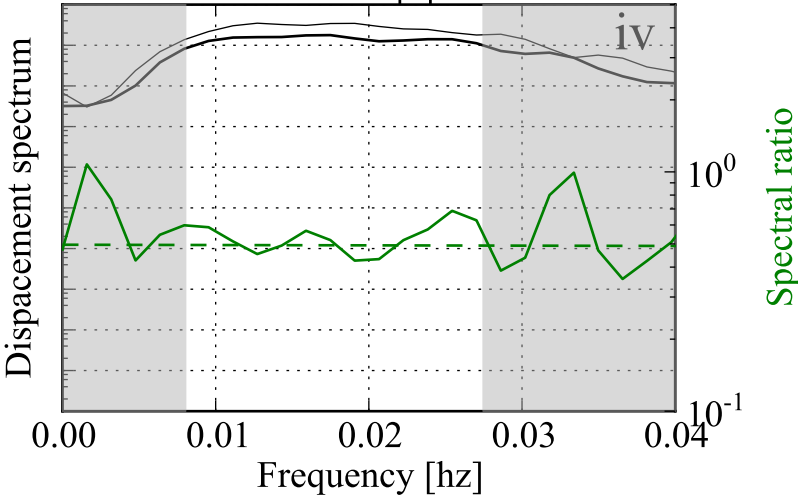

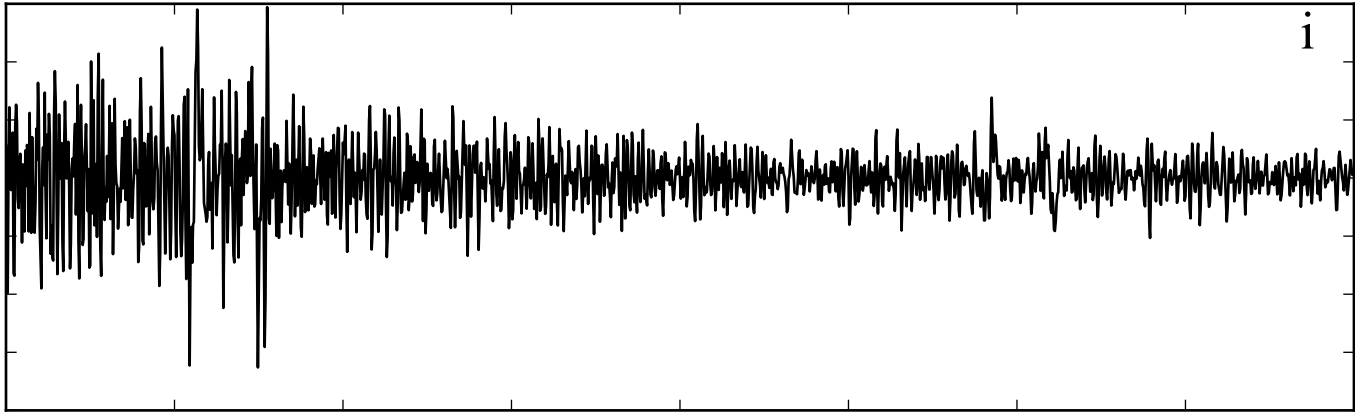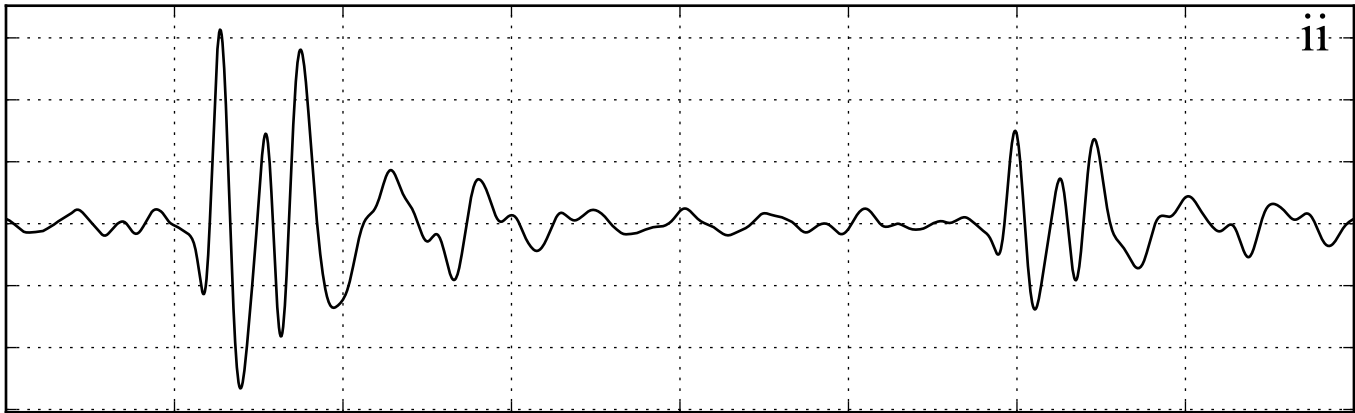

Time [s]

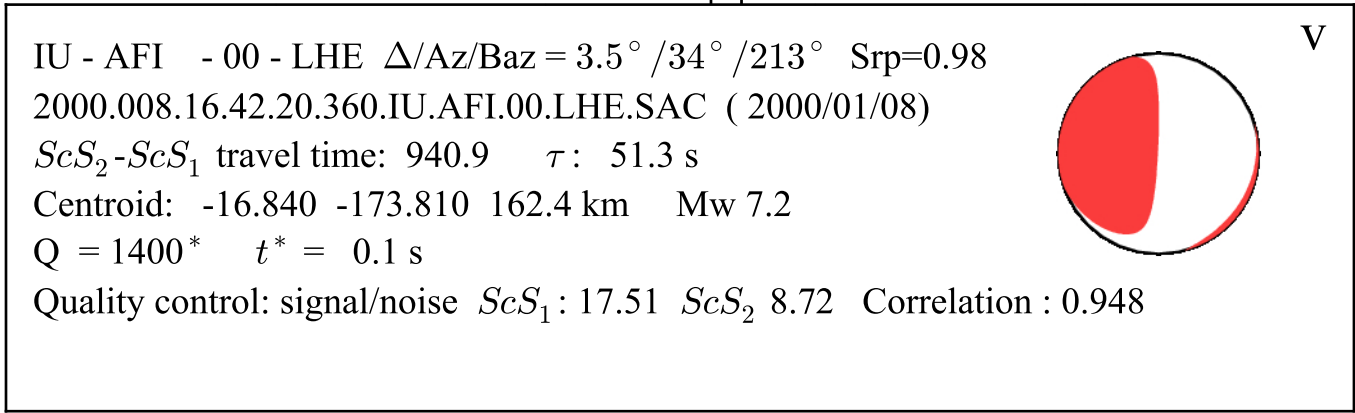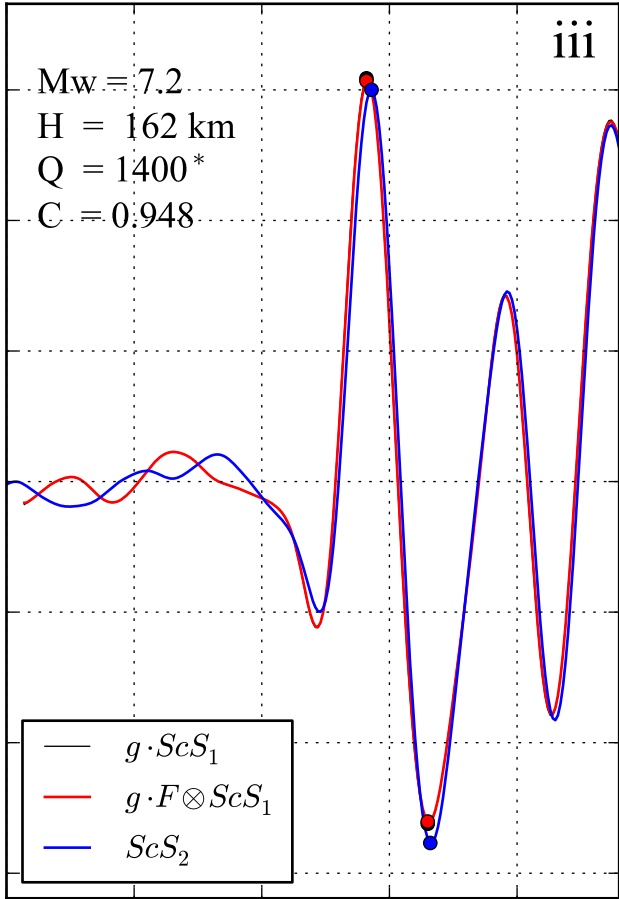

Time [s]

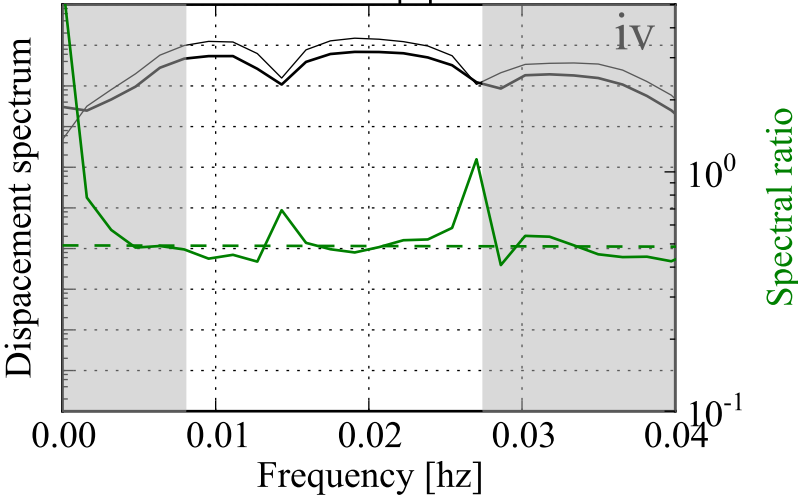

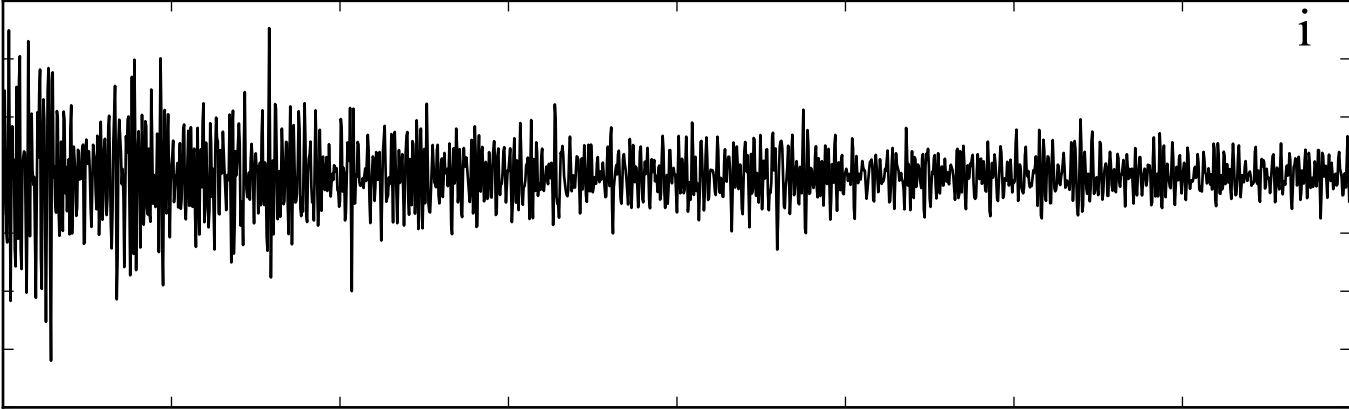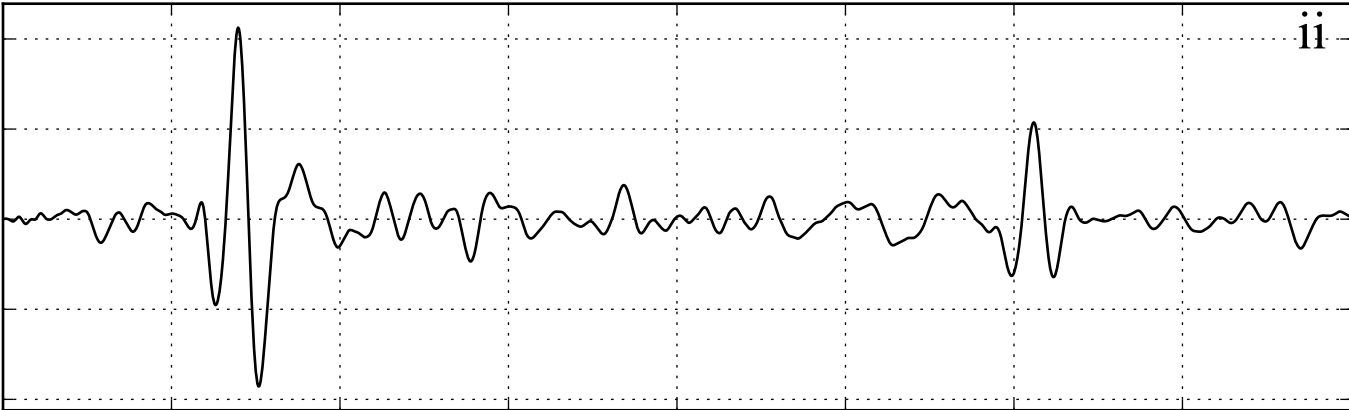

Time [s]

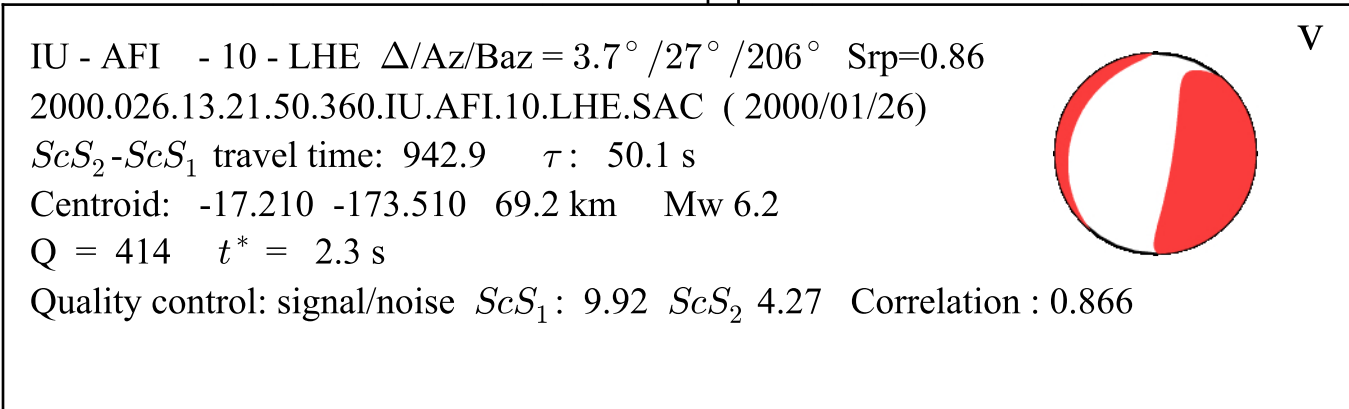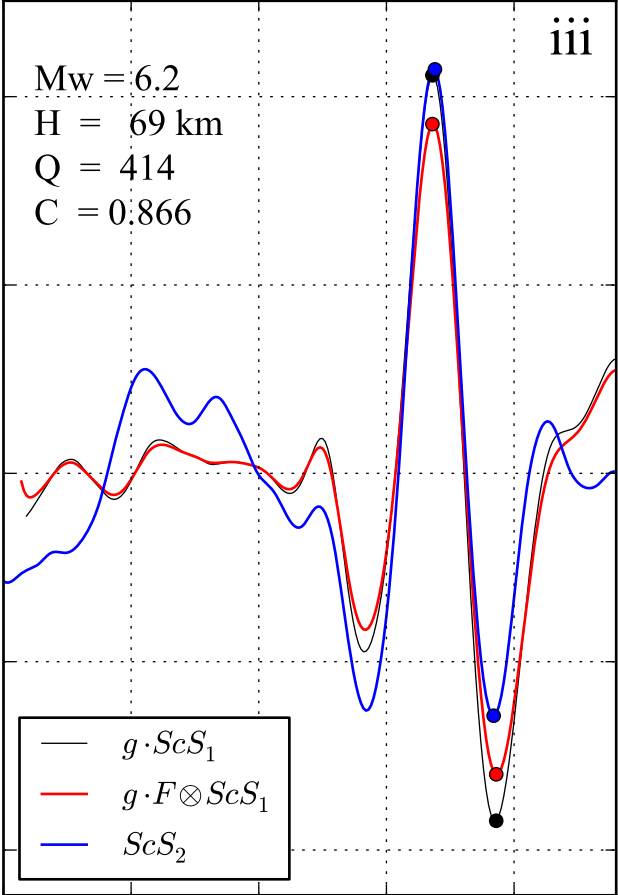

Time [s]

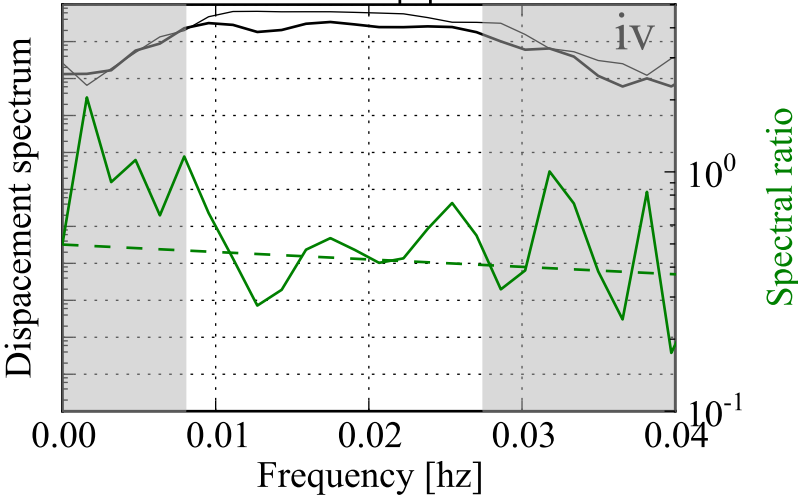

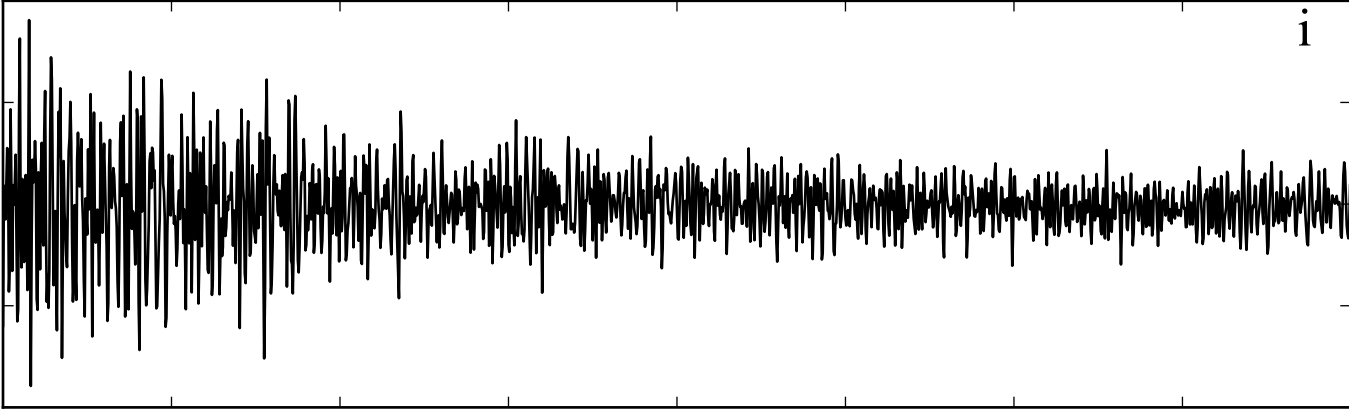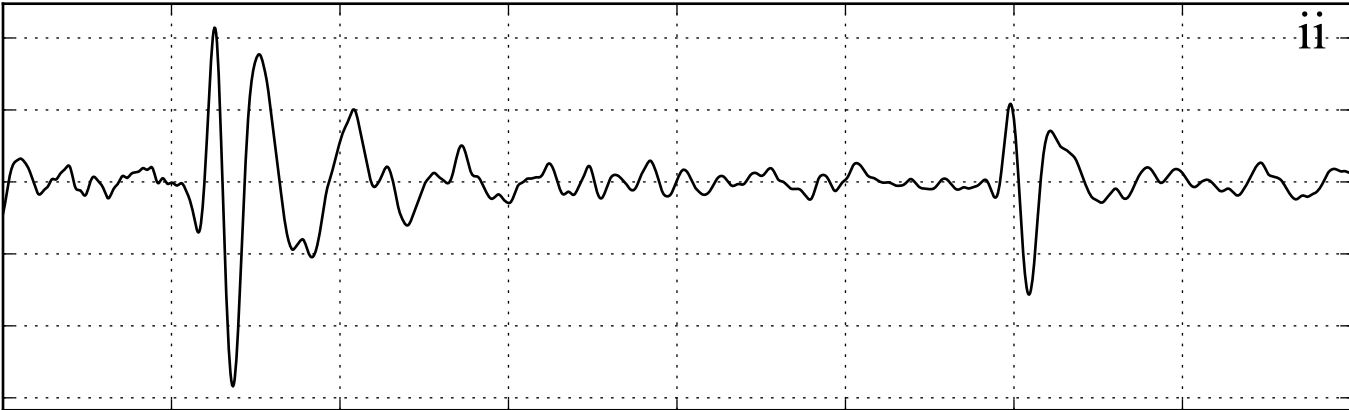

Time [s]

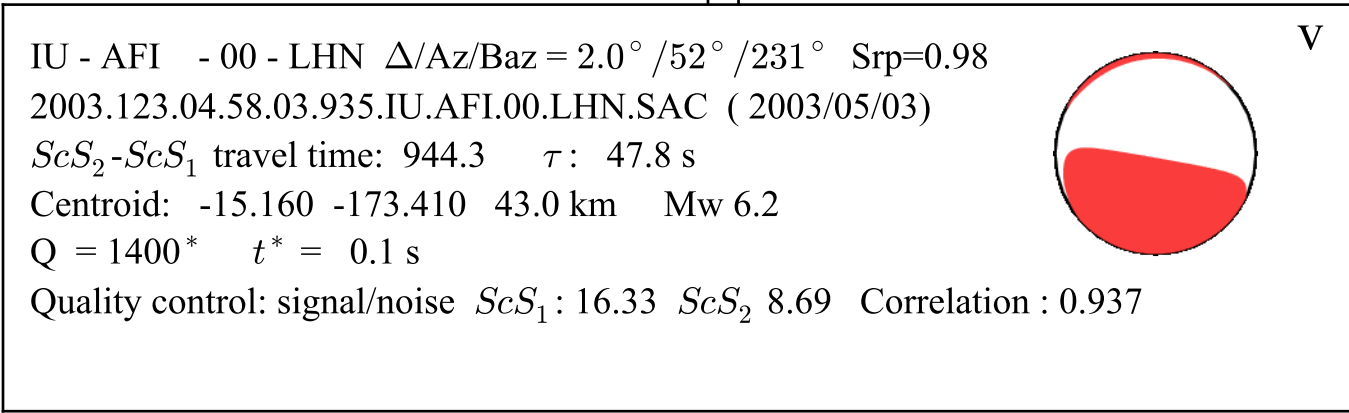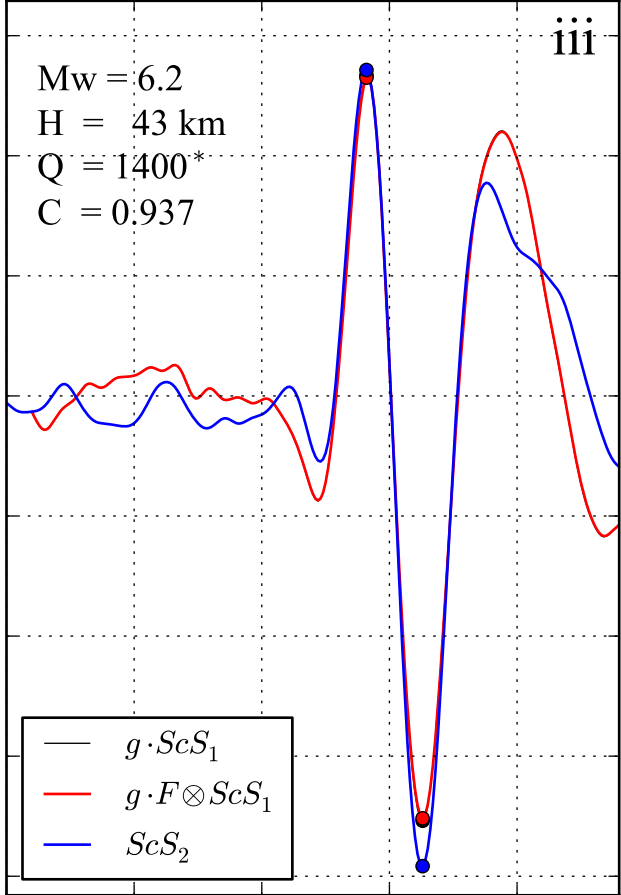

Time [s]

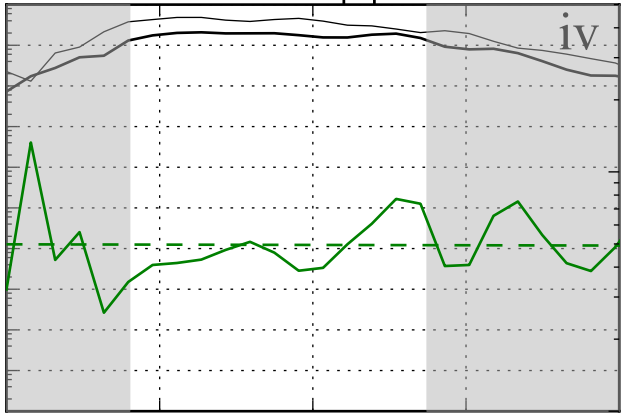

Frequency [hz]

Spectral ratio

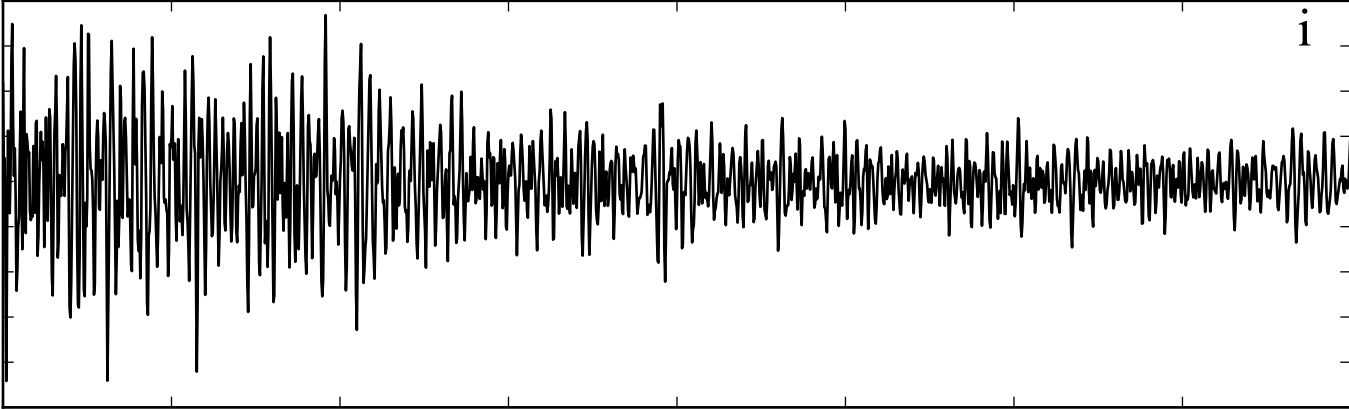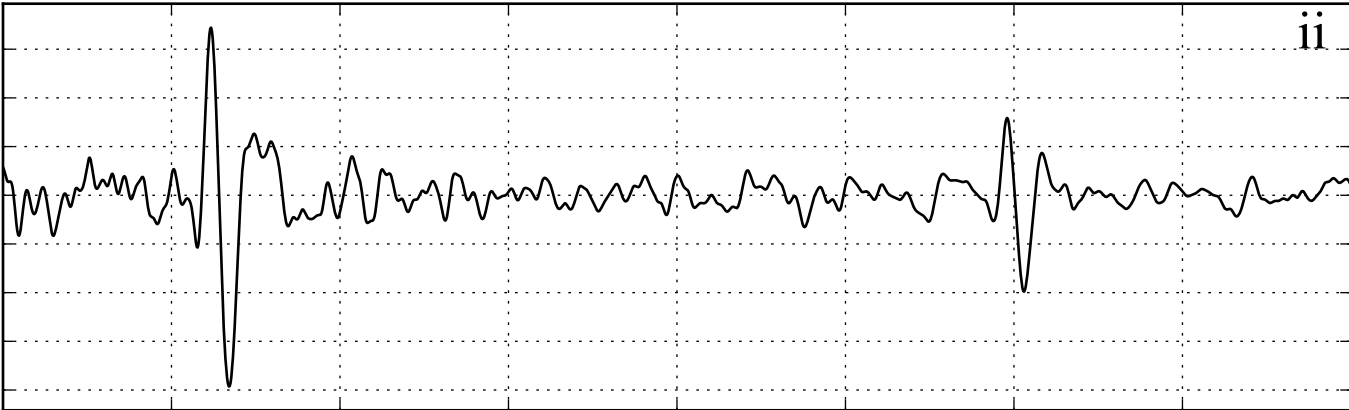

Time [s]

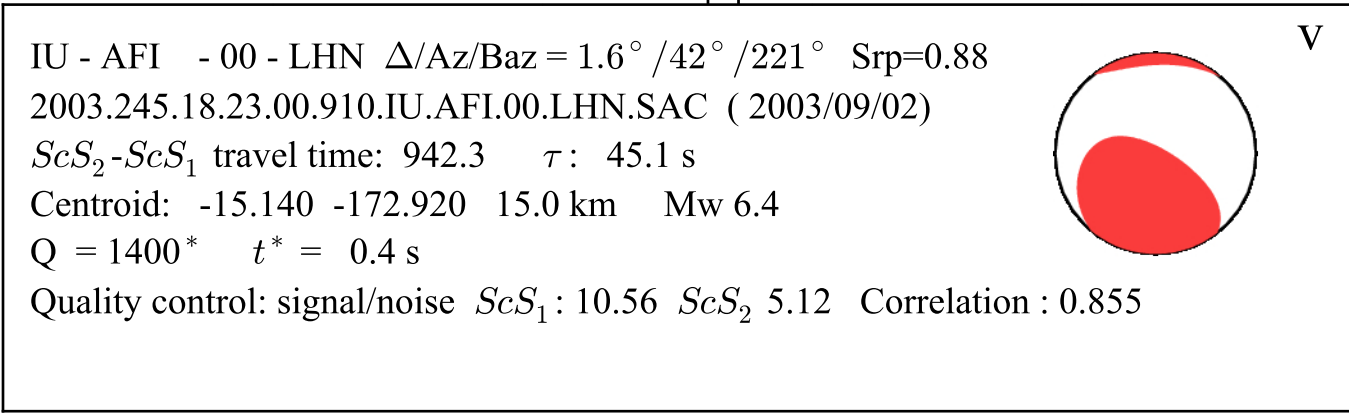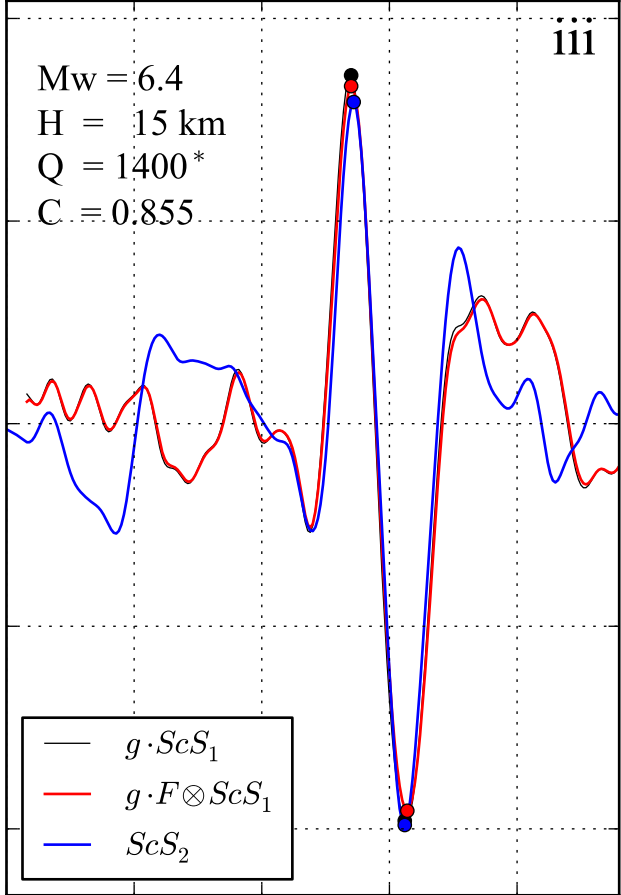

Time [s]

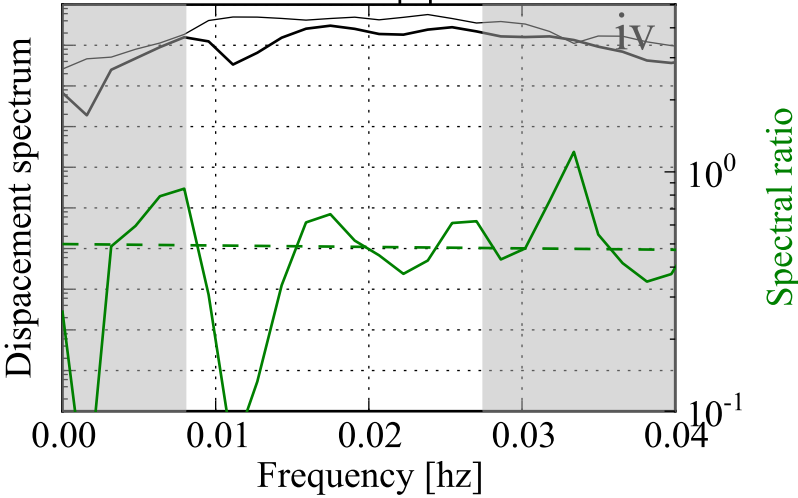

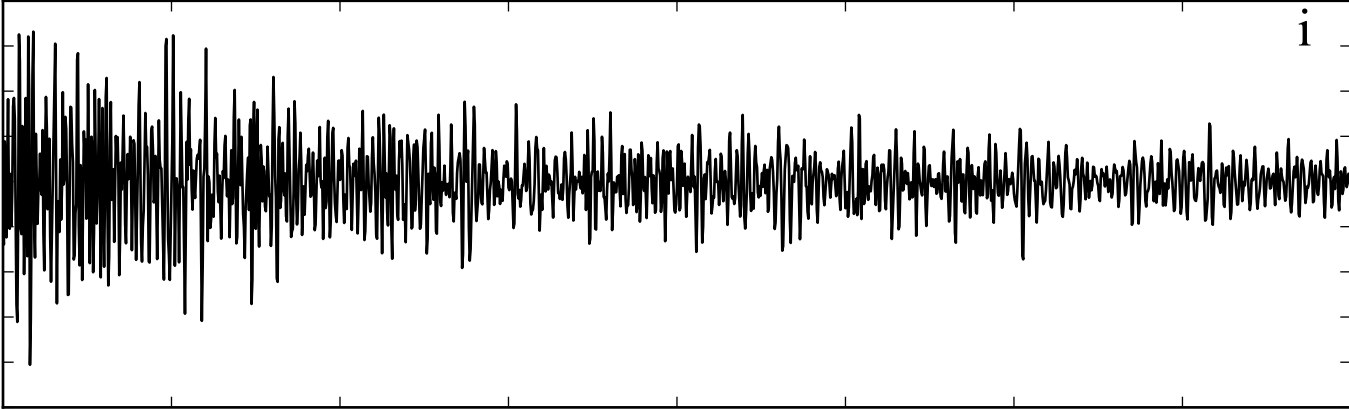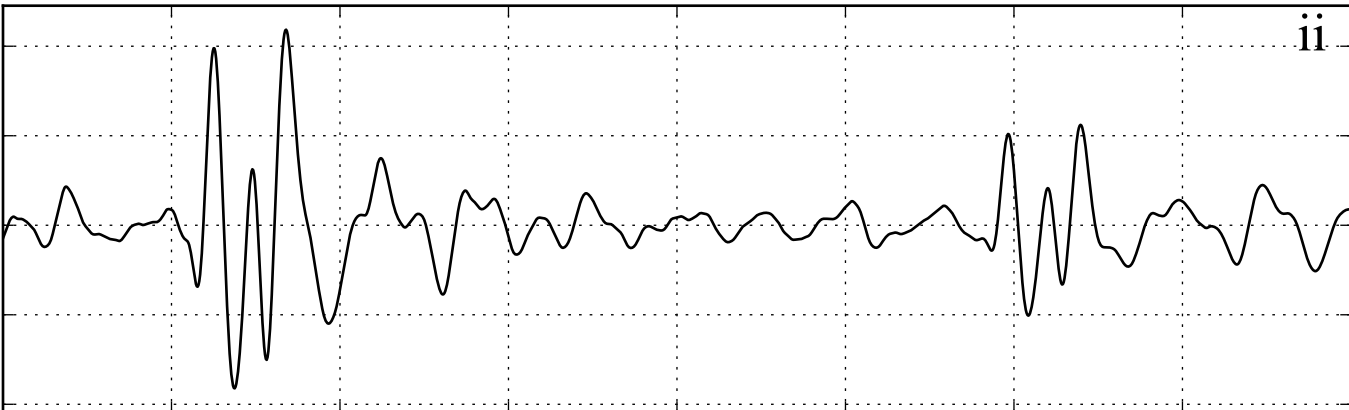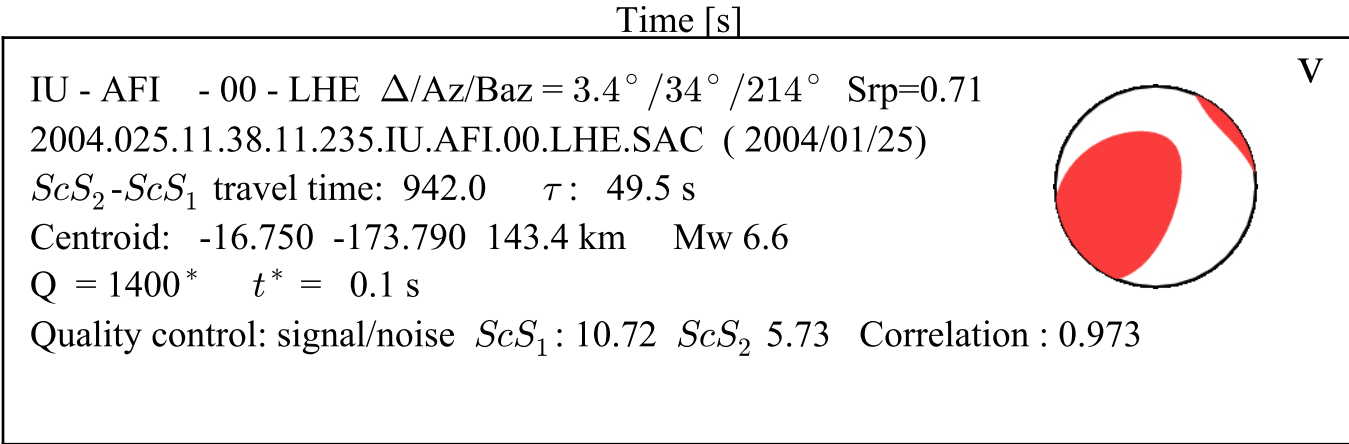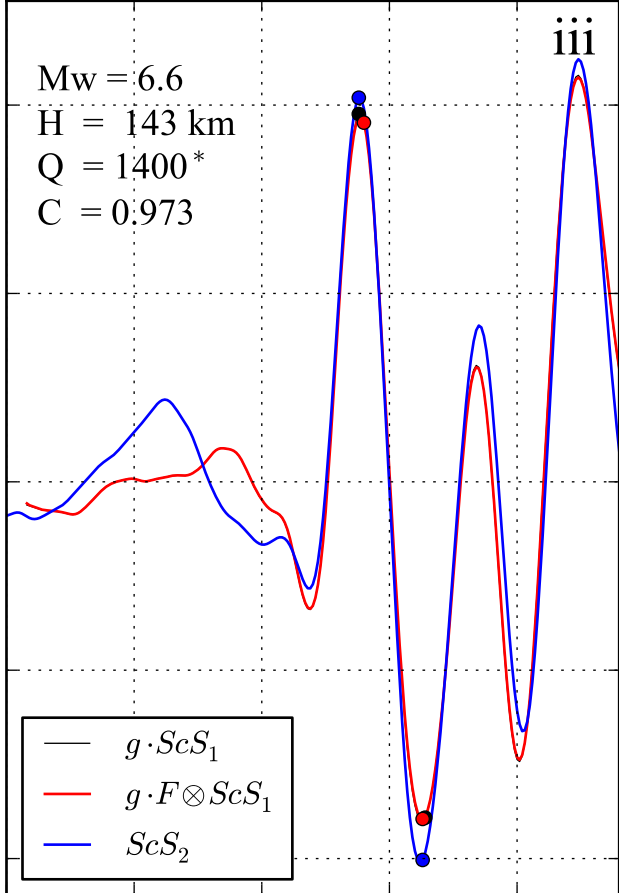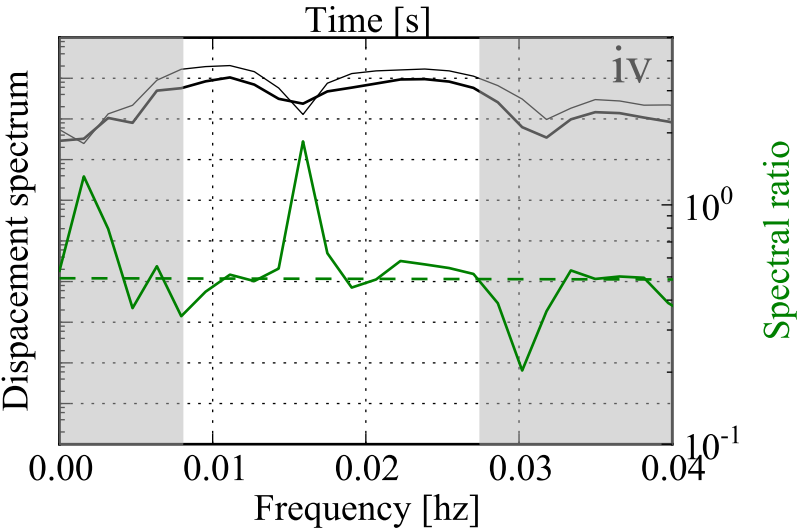



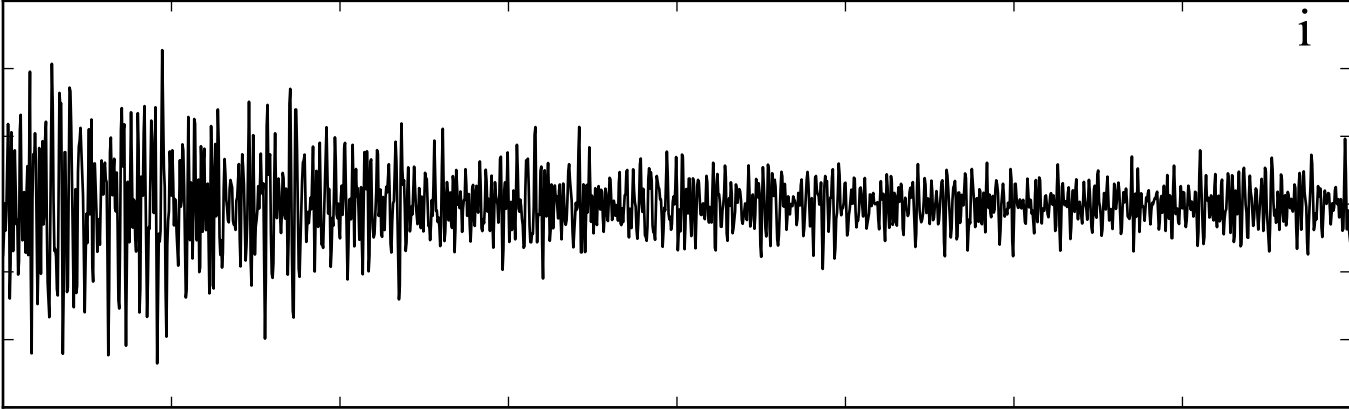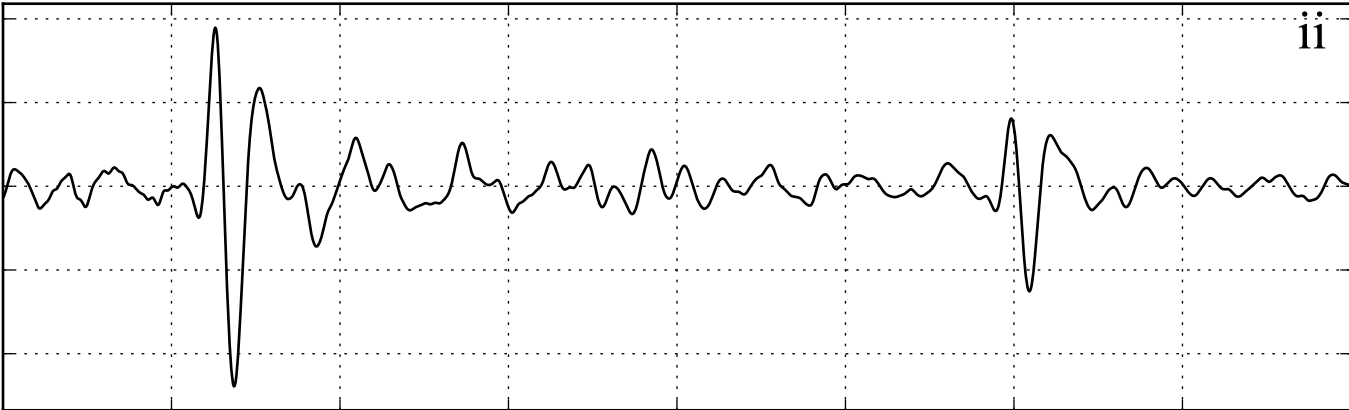

Time [s]

IU - AFI - 00 - LH1  $\Delta/Az/Baz = 2.0^\circ / 52^\circ / 231^\circ$   $Srp=0.99$   
2011.248.09.47.01.069.IU.AFI.00.LH1.SAC ( 2011/09/05)  
 $ScS_2-ScS_1$  travel time: 942.3  $\tau$ : 49.8 s  
Centroid: -15.180 -173.440 54.3 km Mw 6.2  
 $Q = 1400^*$   $t^* = 0.5$  s  
Quality control: signal/noise  $ScS_1$ : 12.20  $ScS_2$  5.88 Correlation : 0.916

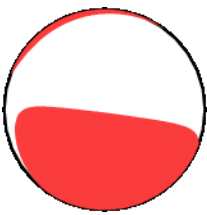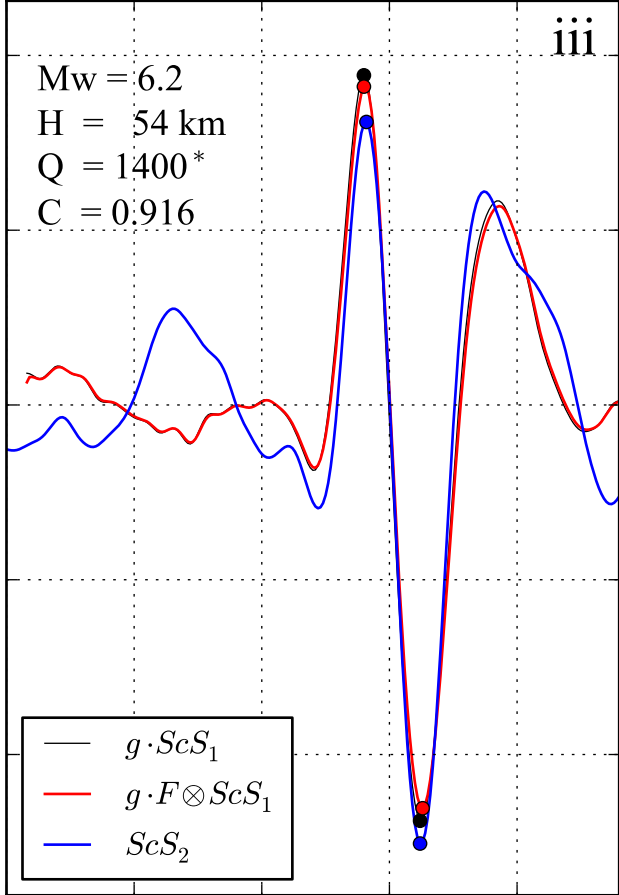

Time [s]

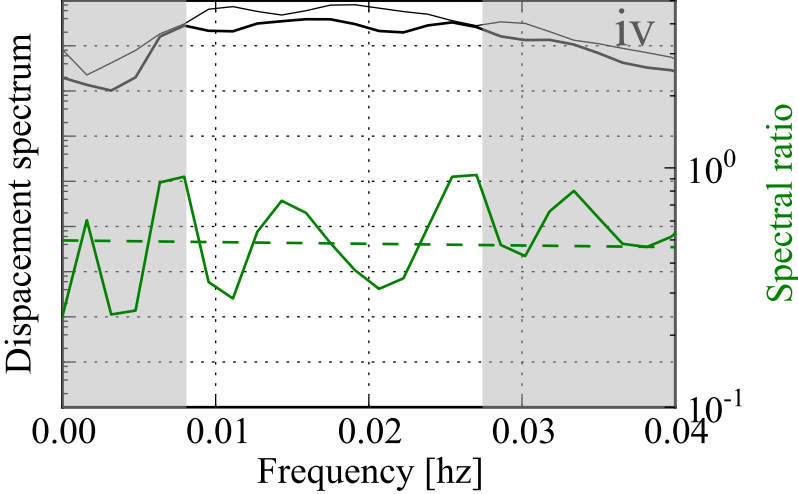

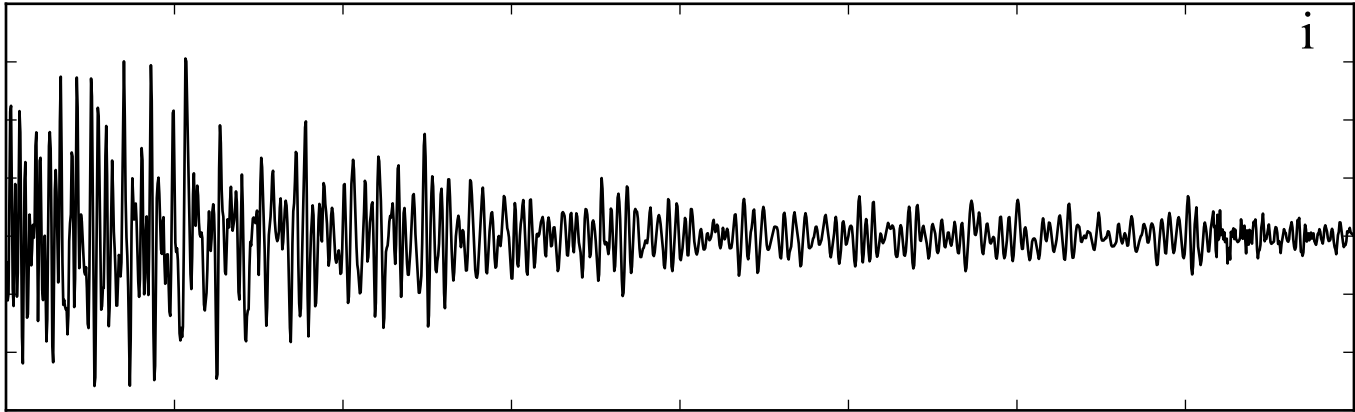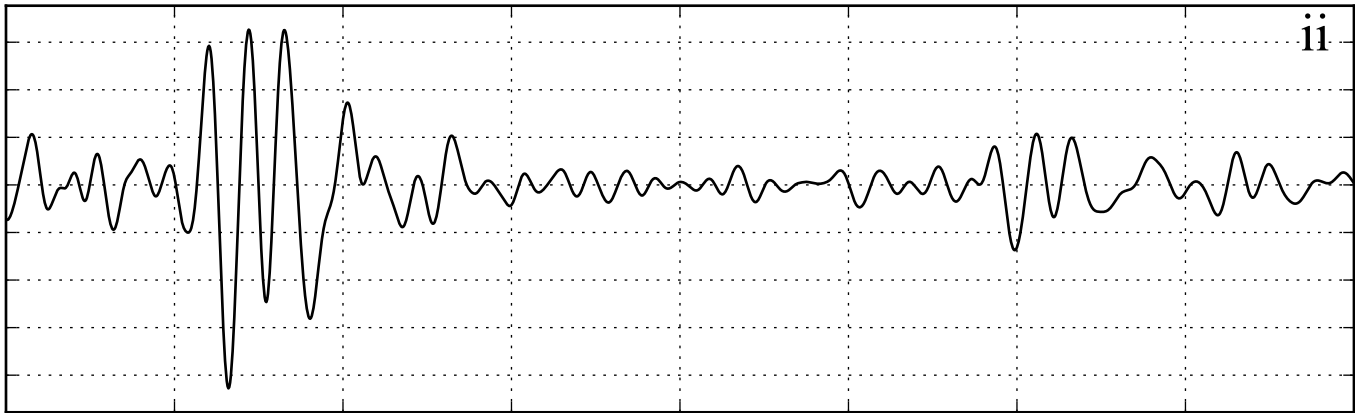

Time [s]

CU - ANWB - - LHE  $\Delta/Az/Baz = 2.6^\circ/352^\circ/172^\circ$   $Srp=0.84$   
2007.333.18.55.19.000.CU.ANWB..LHE.SAC ( 2007/11/29)  
 $ScS_2-ScS_1$  travel time: 933.2  $\tau$ : 48.4 s  
Centroid: 15.060 -61.410 147.9 km Mw 7.4  
 $Q = 151$   $t^* = 6.1$  s  
Quality control: signal/noise  $ScS_1$ : 14.69  $ScS_2$  4.78 Correlation : 0.916

v

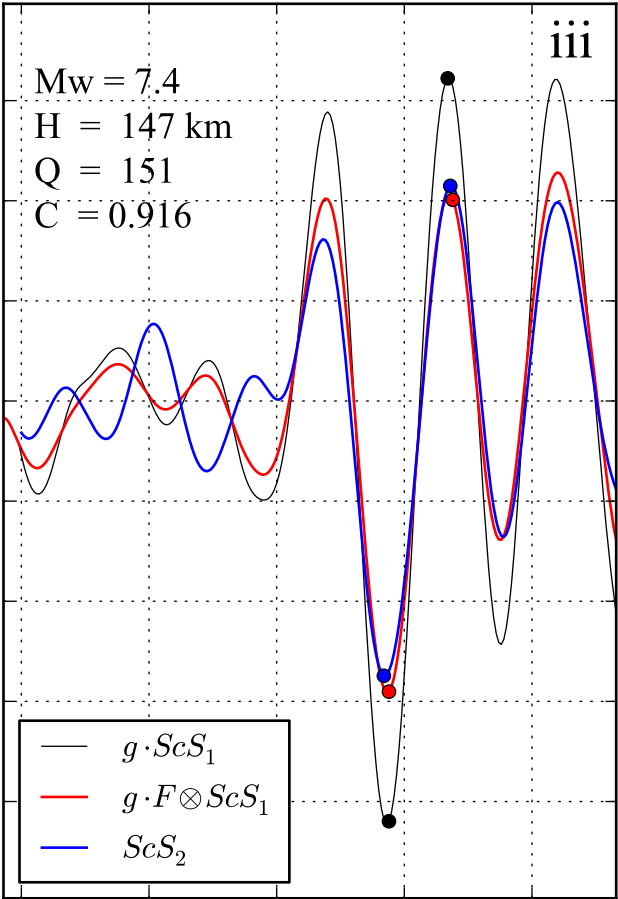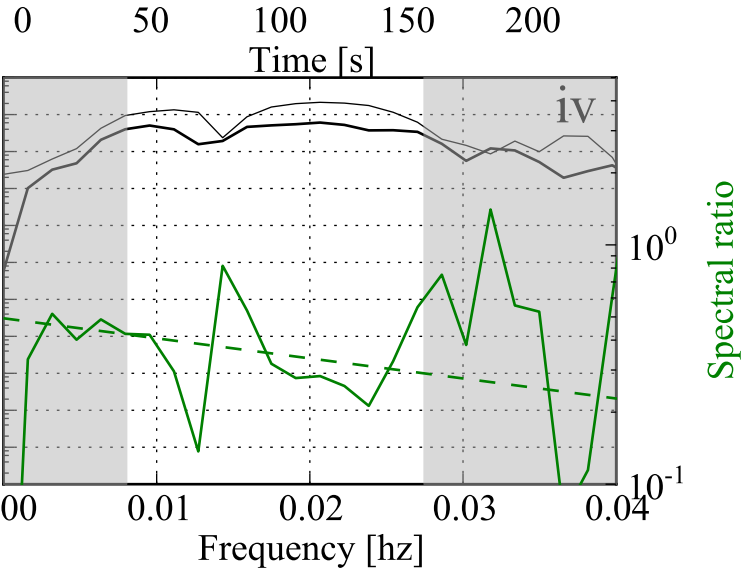

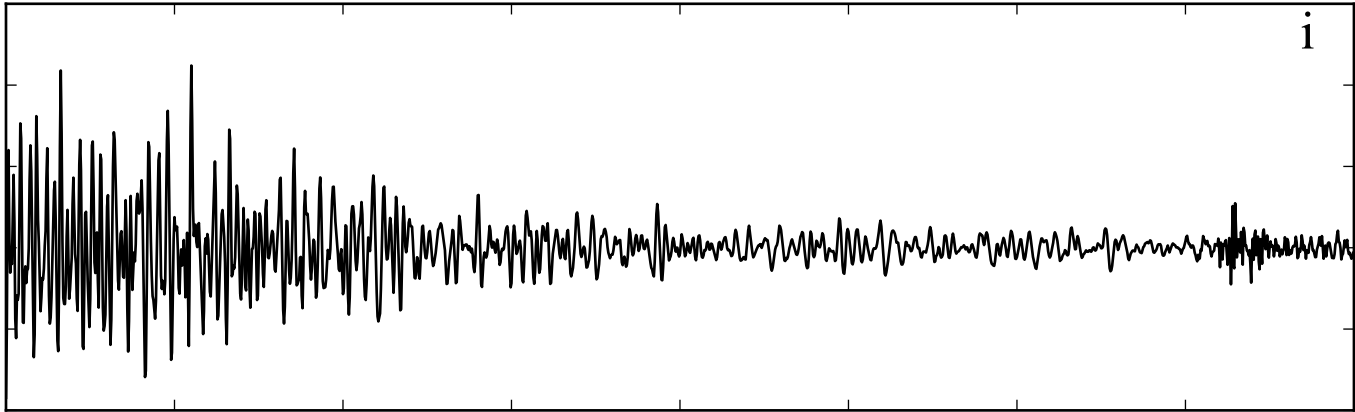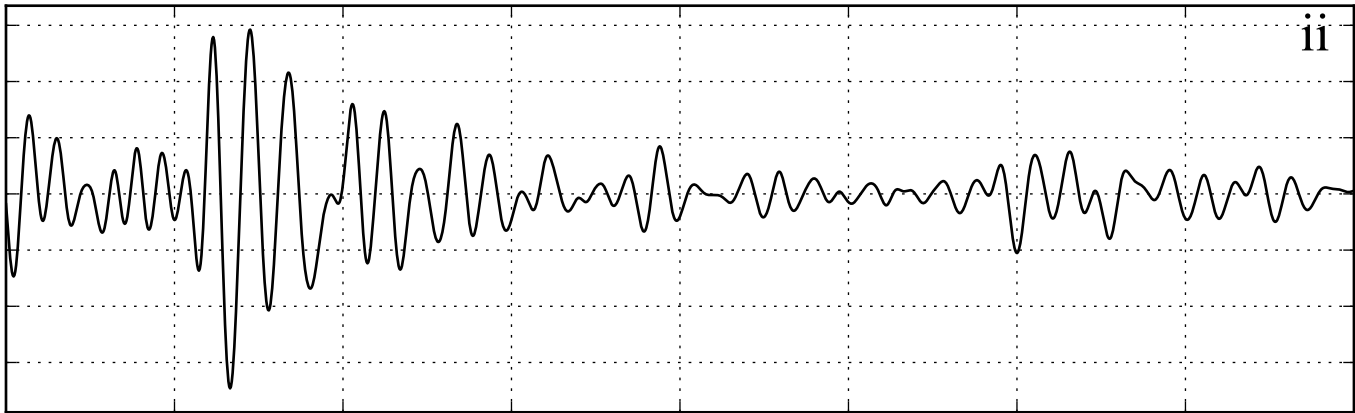

Time [s]

CU - BBGH - - LHE  $\Delta/Az/Baz = 2.6^\circ/136^\circ/316^\circ$   $Srp=0.84$   
2007.333.18.55.19.999.CU.BBGH..LHE.SAC ( 2007/11/29)  
 $ScS_2$ - $ScS_1$  travel time: 931.1  $\tau$ : 42.3 s  
Centroid: 15.060 -61.410 147.9 km Mw 7.4  
 $Q = 108$   $t^* = 8.6$  s  
Quality control: signal/noise  $ScS_1$ : 13.05  $ScS_2$  3.59 Correlation : 0.827

v



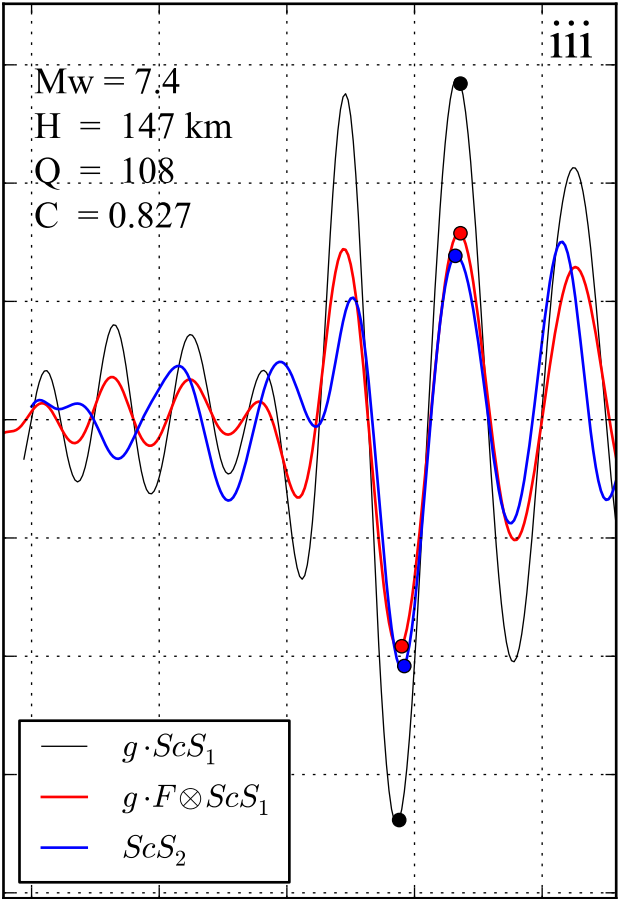

Time [s]

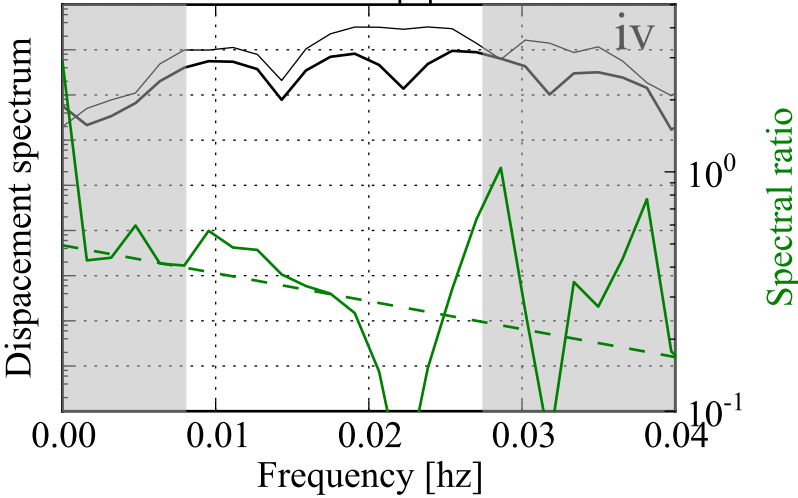

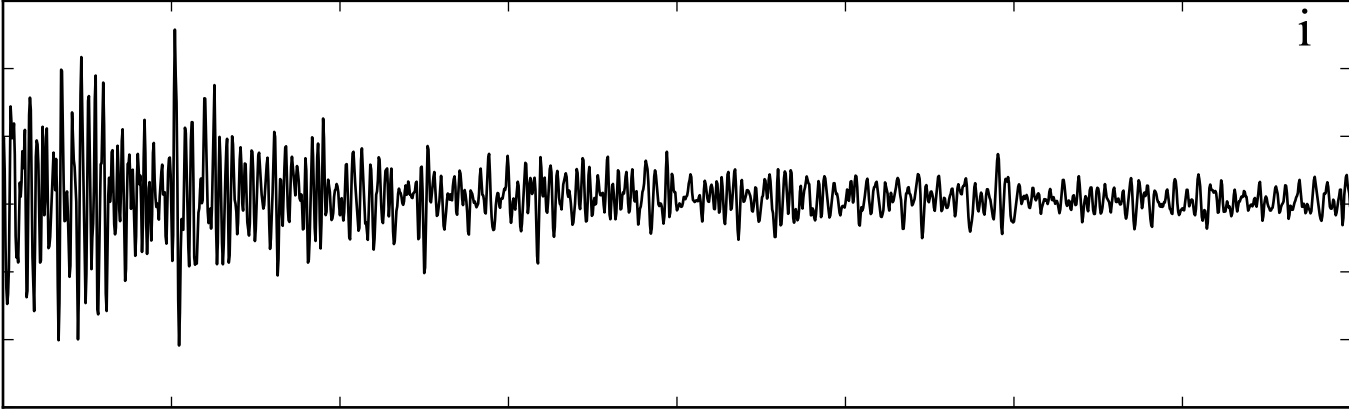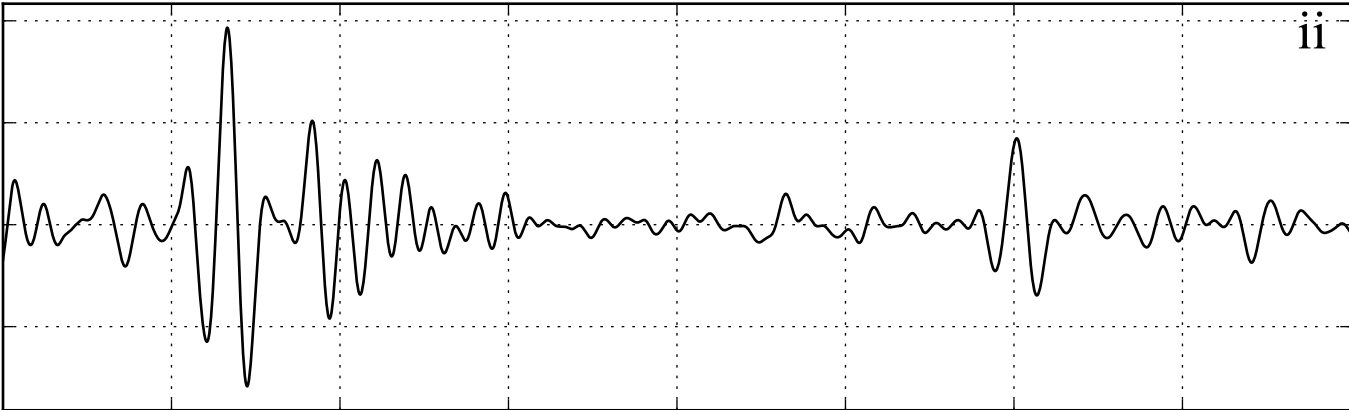

Time [s]

IU - COR - 00 - LHE  $\Delta/Az/Baz = 2.6^\circ/192^\circ/11^\circ$   $Srp=0.83$   
2001.059.18.49.32.311.IU.COR.00.LHE.SAC ( 2001/02/28)  
 $ScS_2-ScS_1$  travel time: 938.0  $\tau$ : 49.1 s  
Centroid: 47.140 -122.530 46.8 km Mw 6.8  
 $Q = 467$   $t^* = 2.0$  s  
Quality control: signal/noise  $ScS_1$ : 12.61  $ScS_2$  5.52 Correlation : 0.915

v

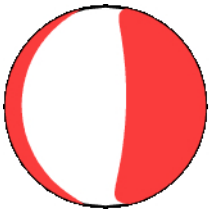

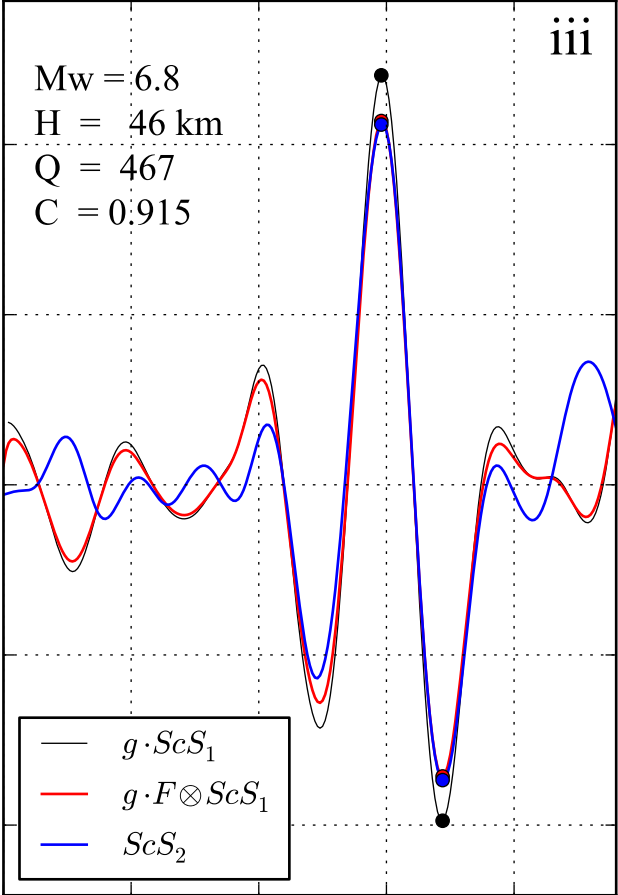

Time [s]

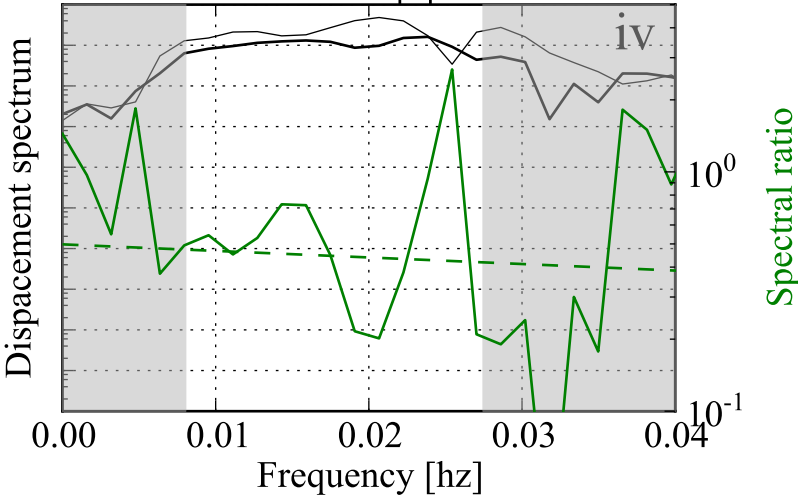

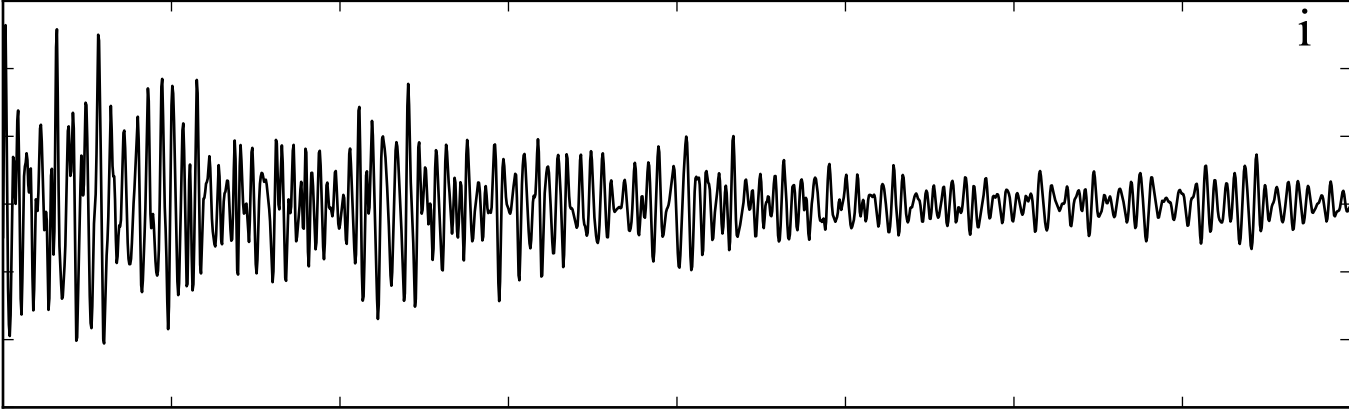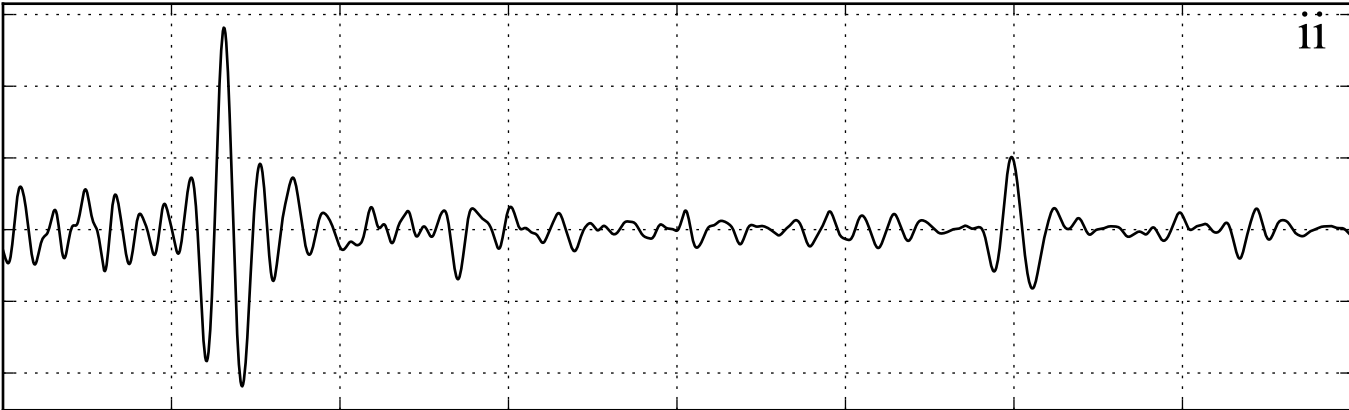

Time [s]

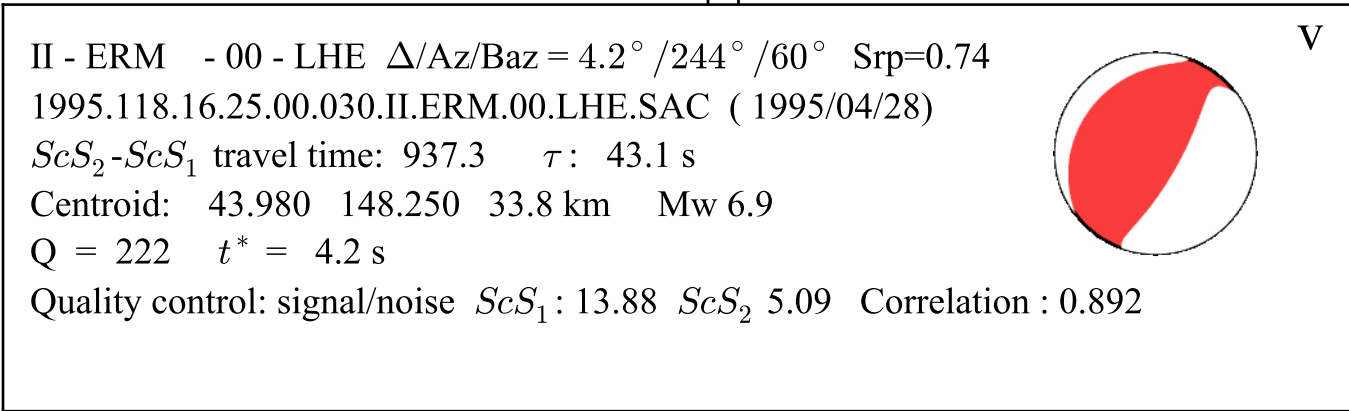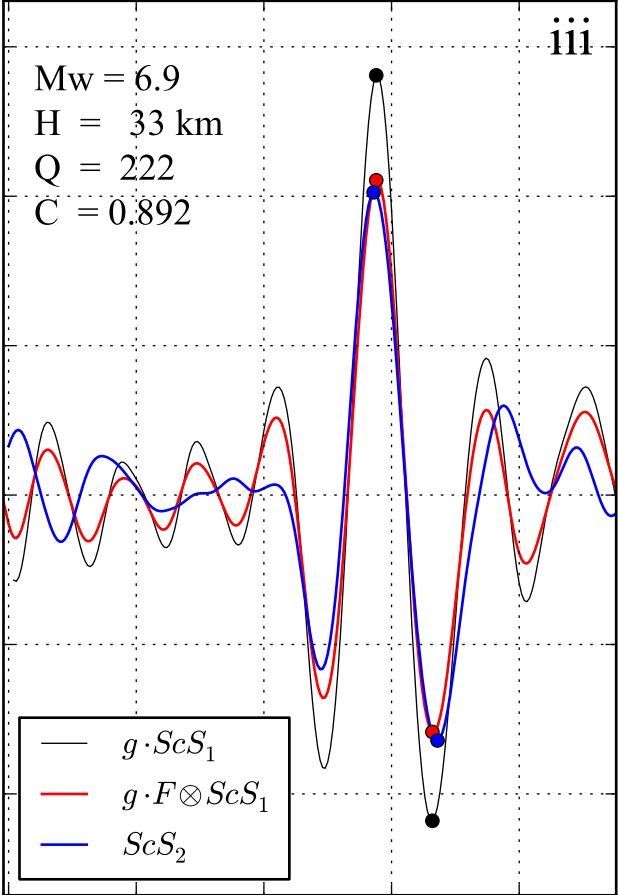

Time [s]

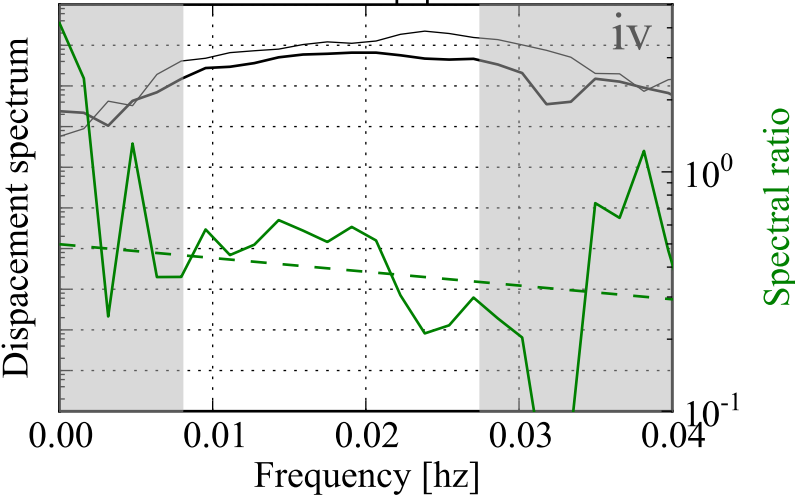

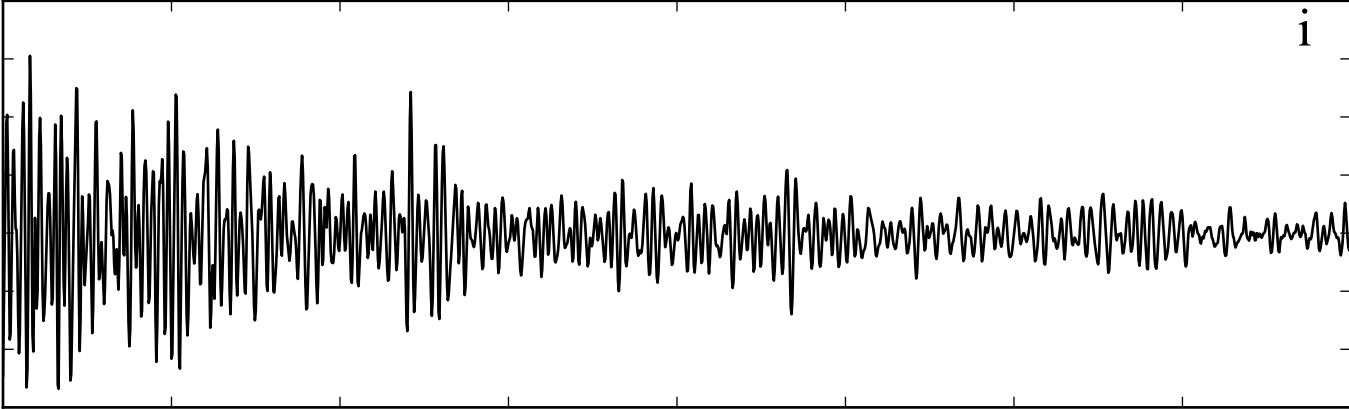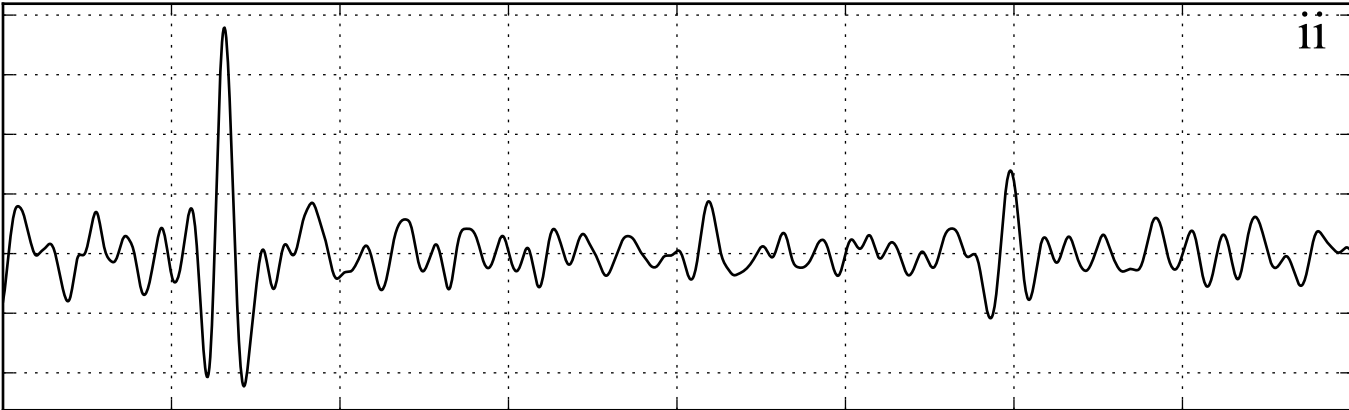

Time [s]

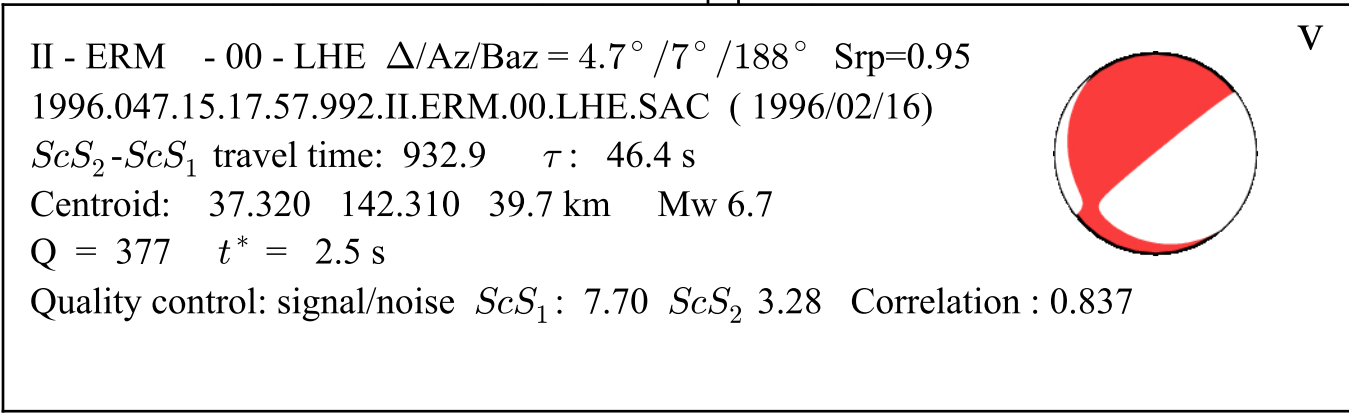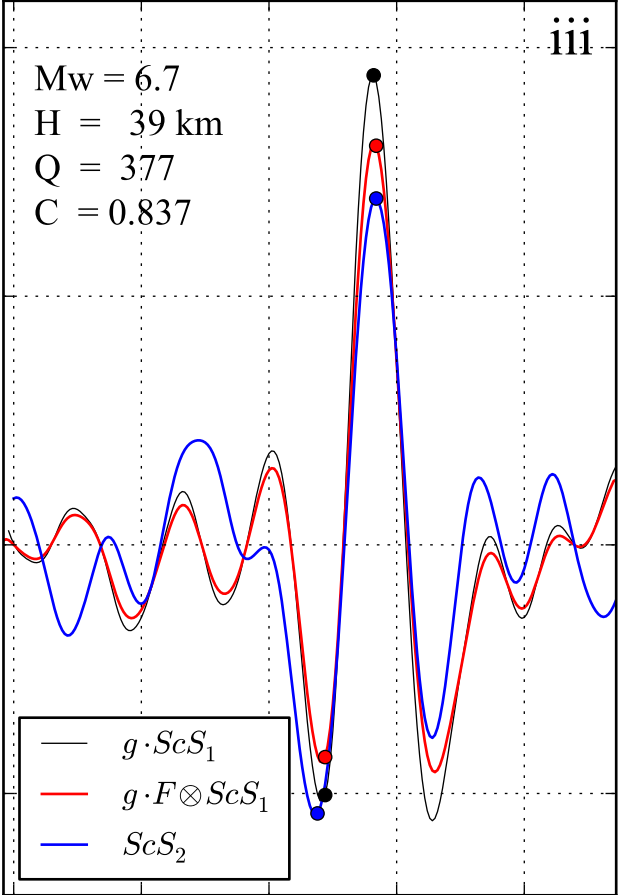

Time [s]

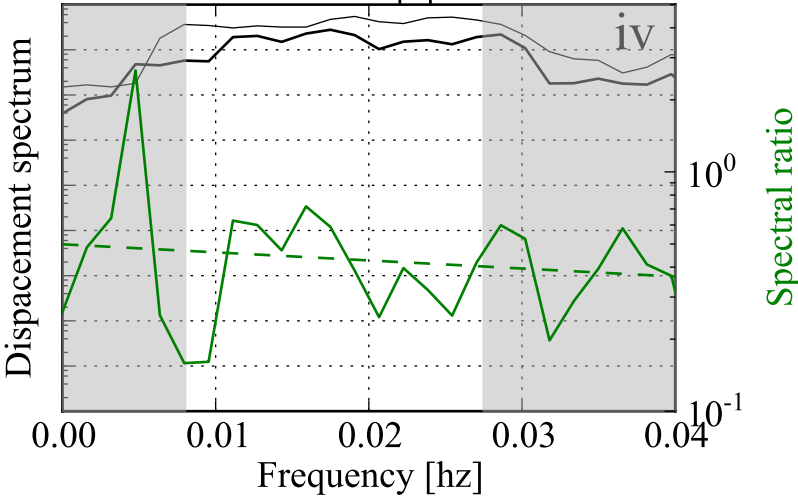

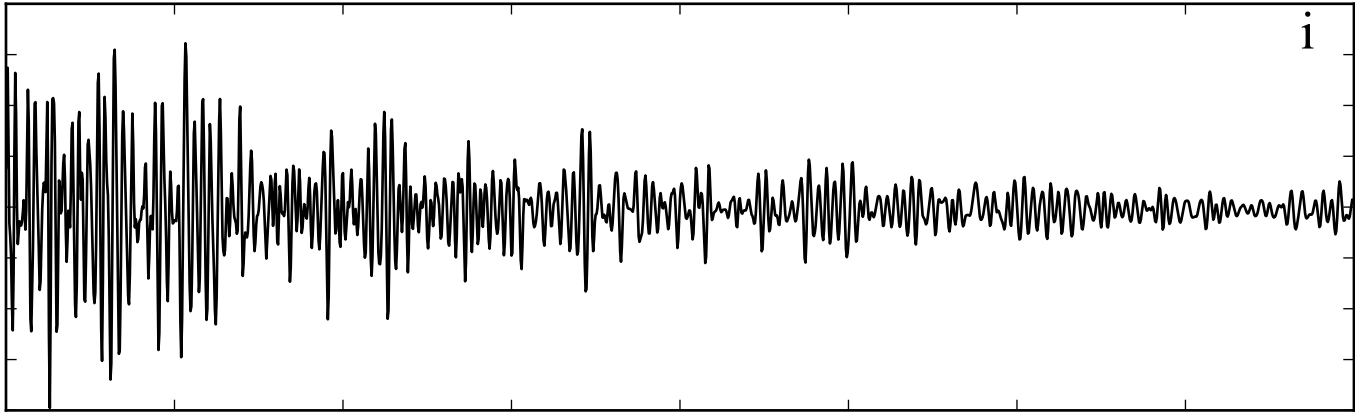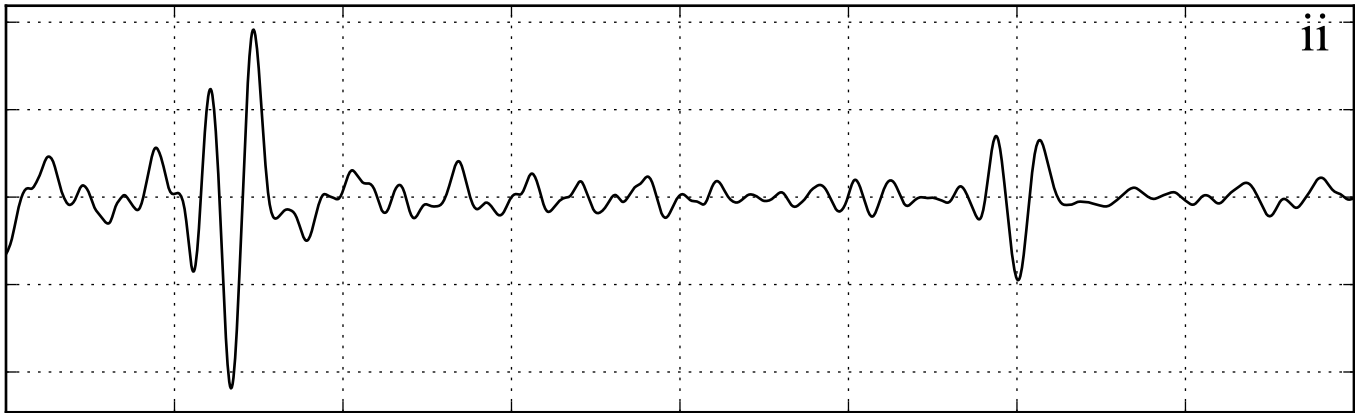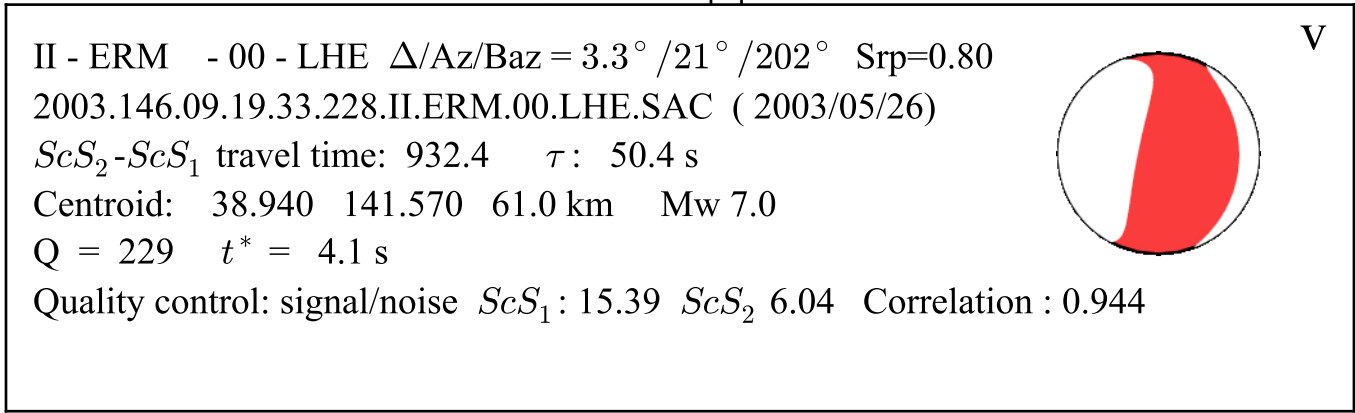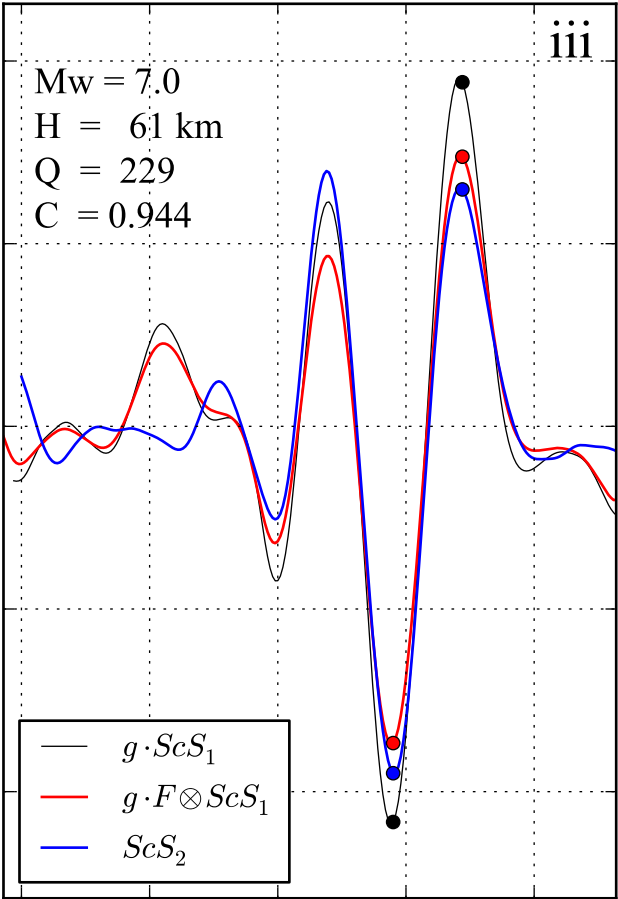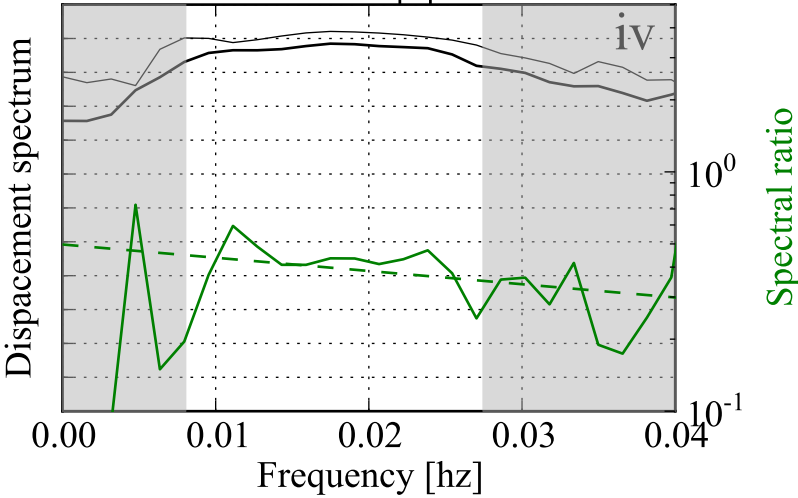

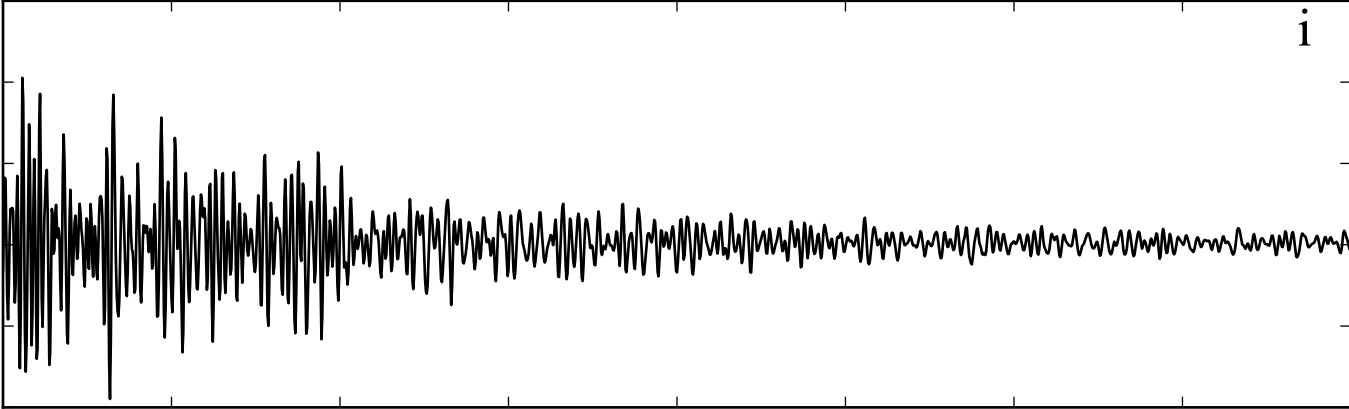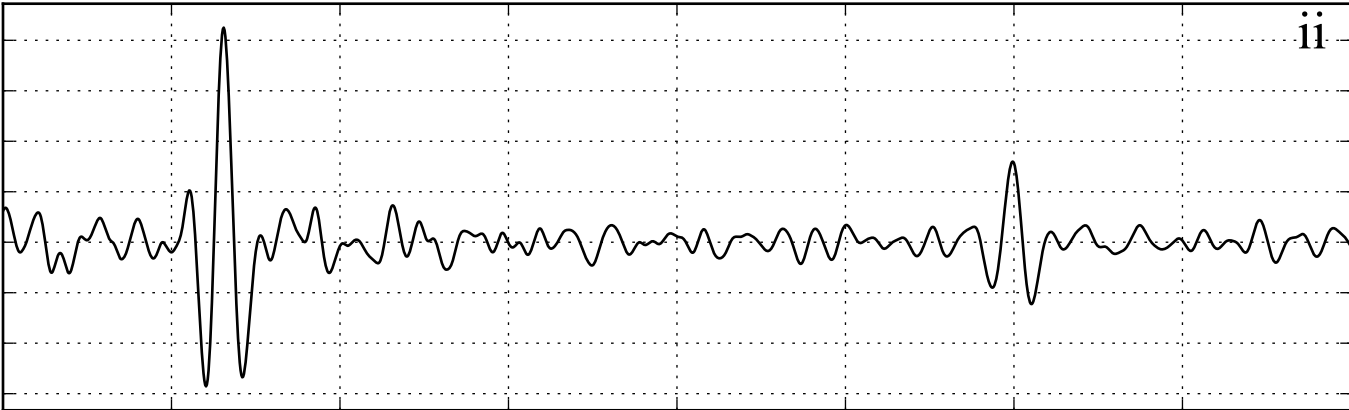

Time [s]

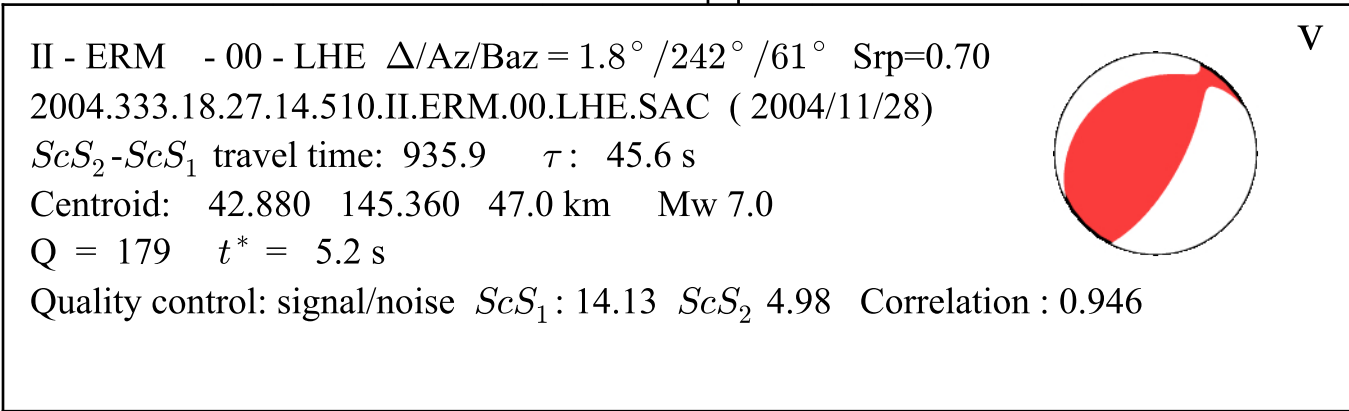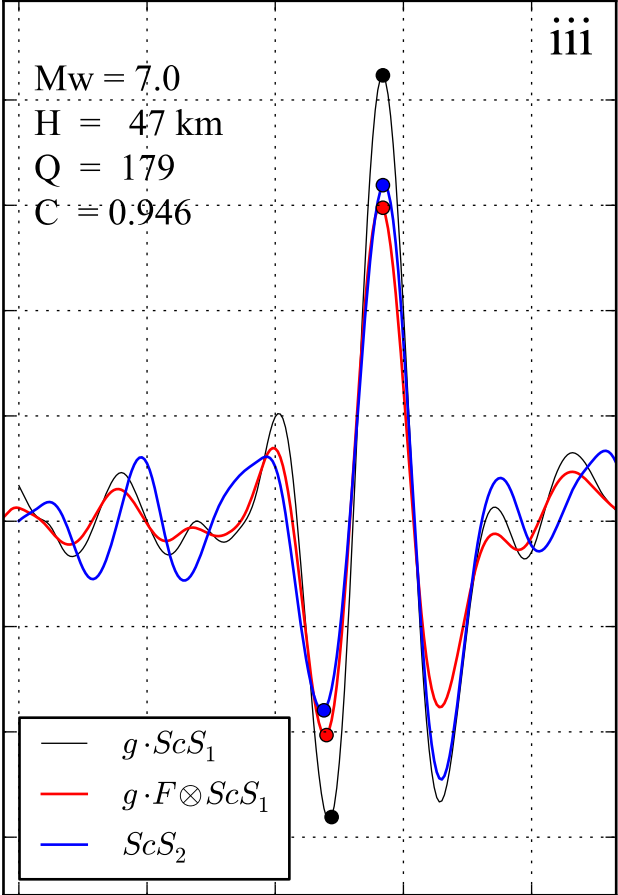

Time [s]

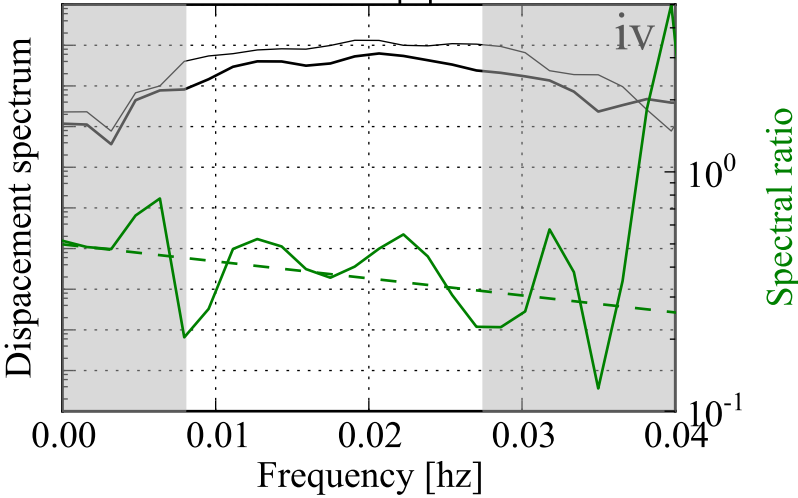



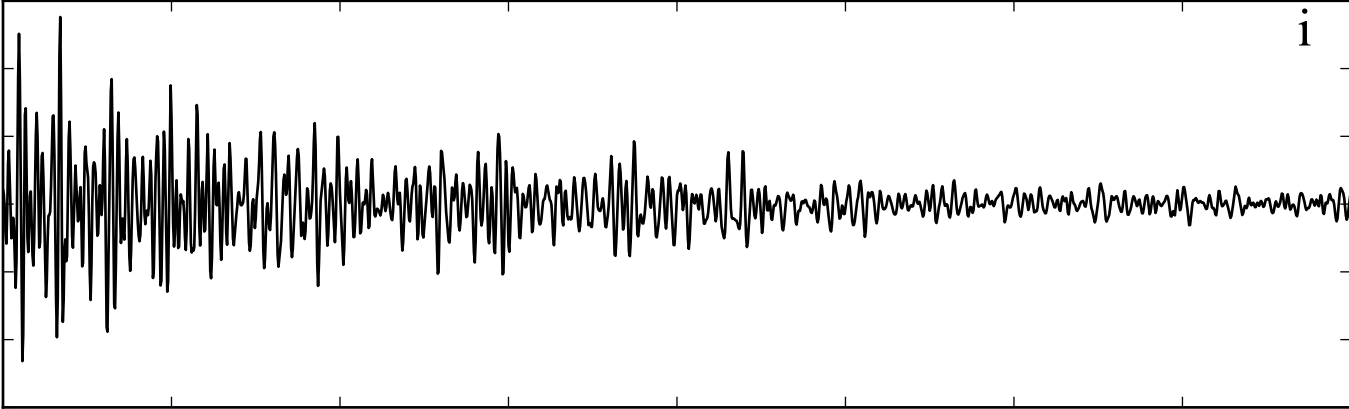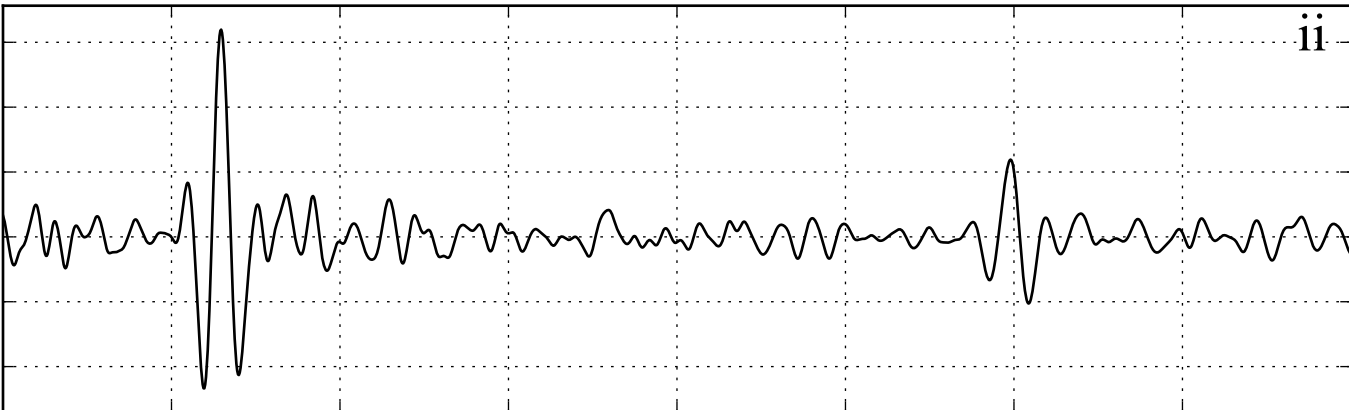

Time [s]

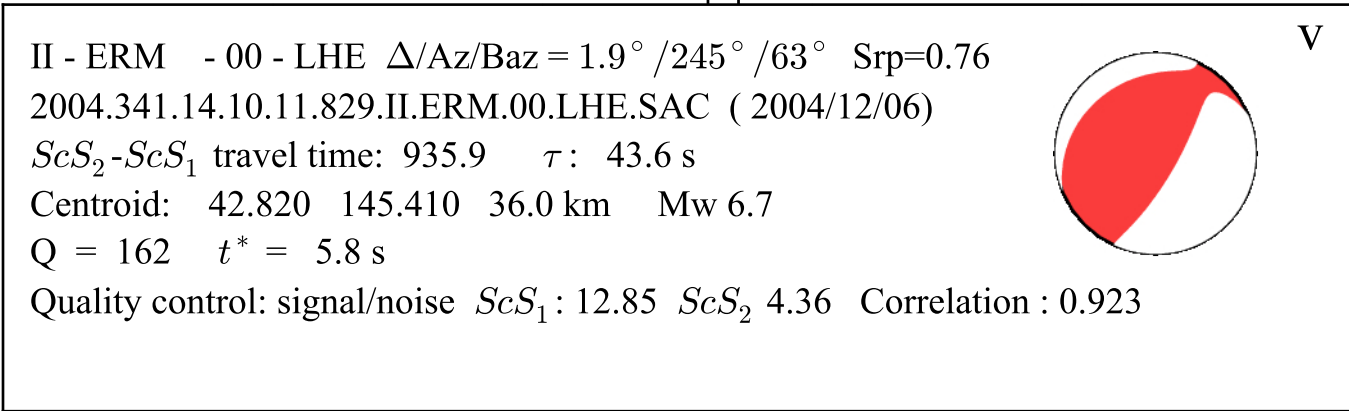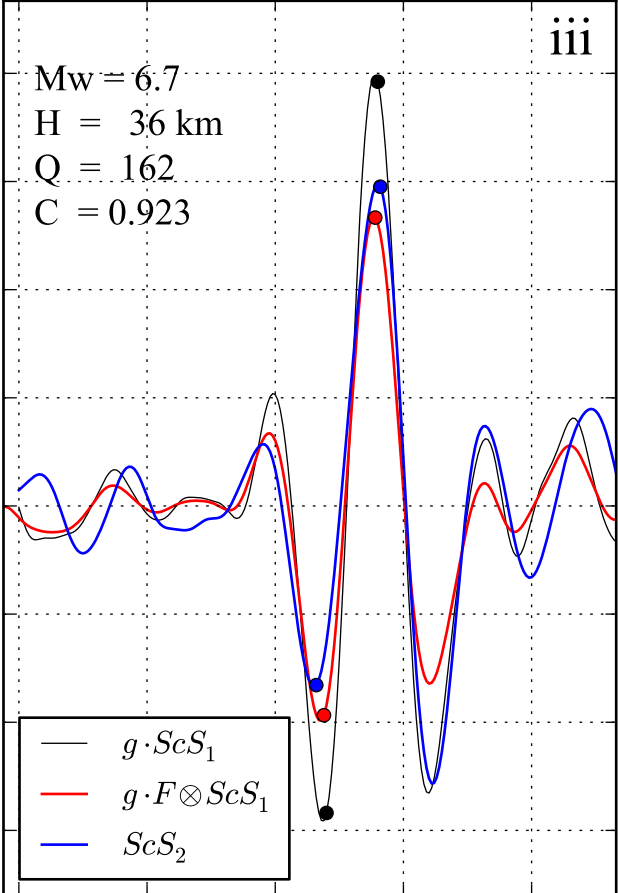

Time [s]

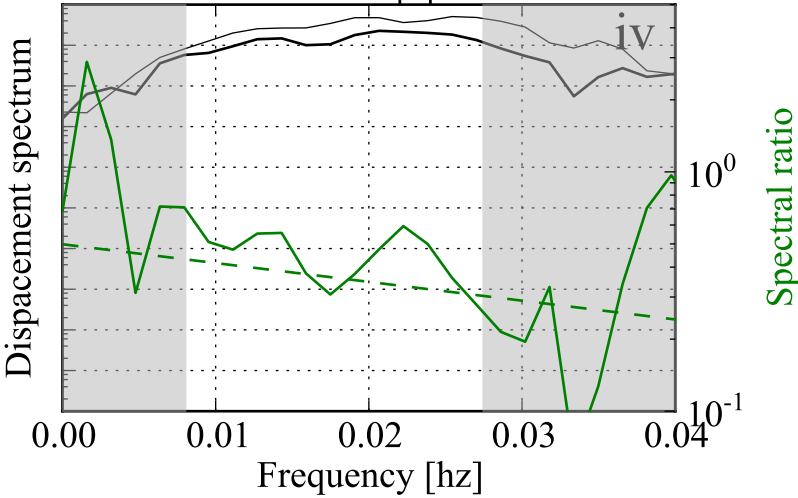

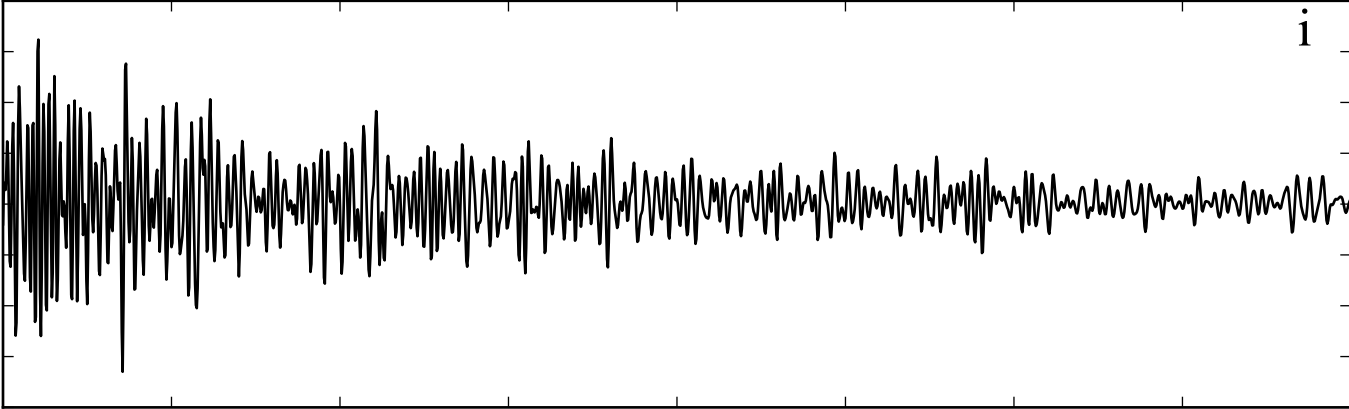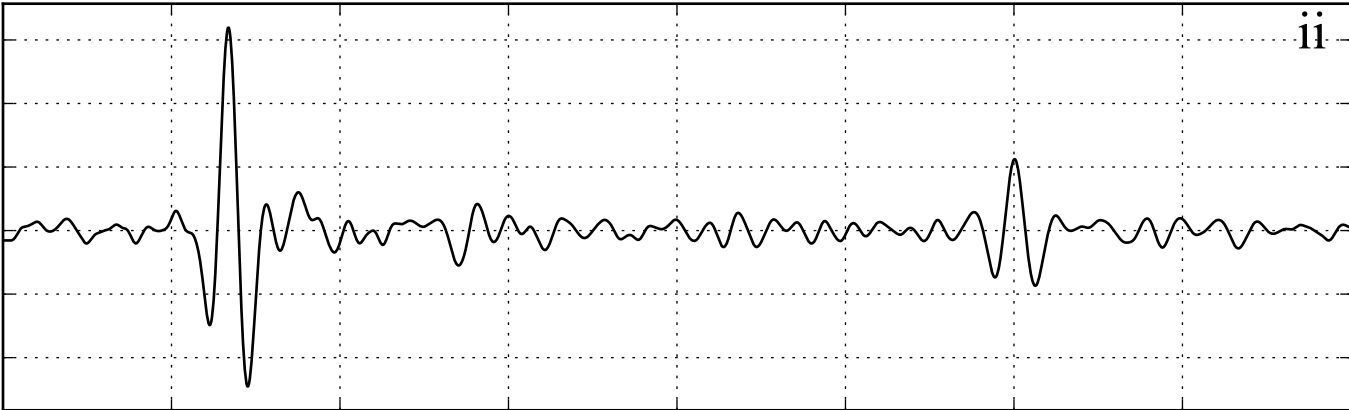

Time [s]

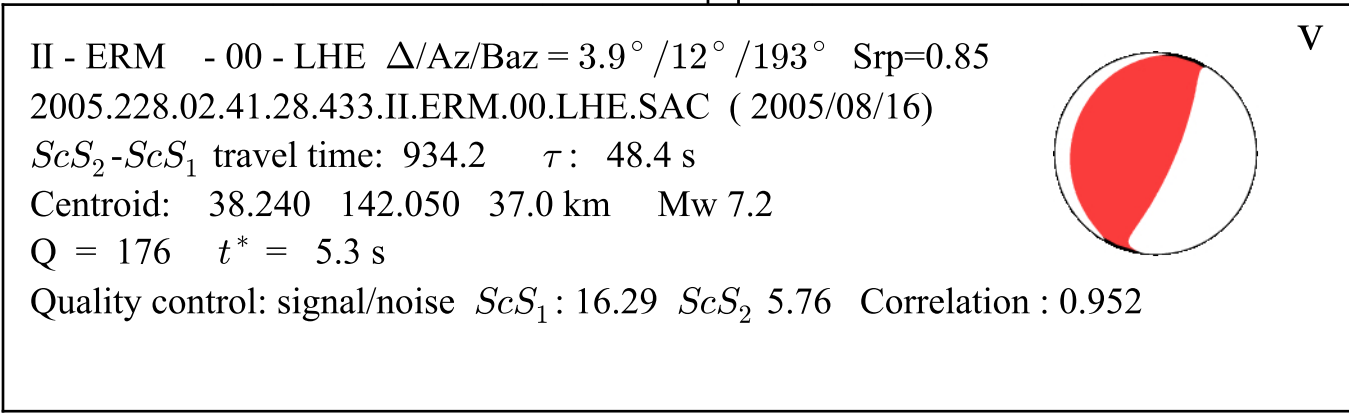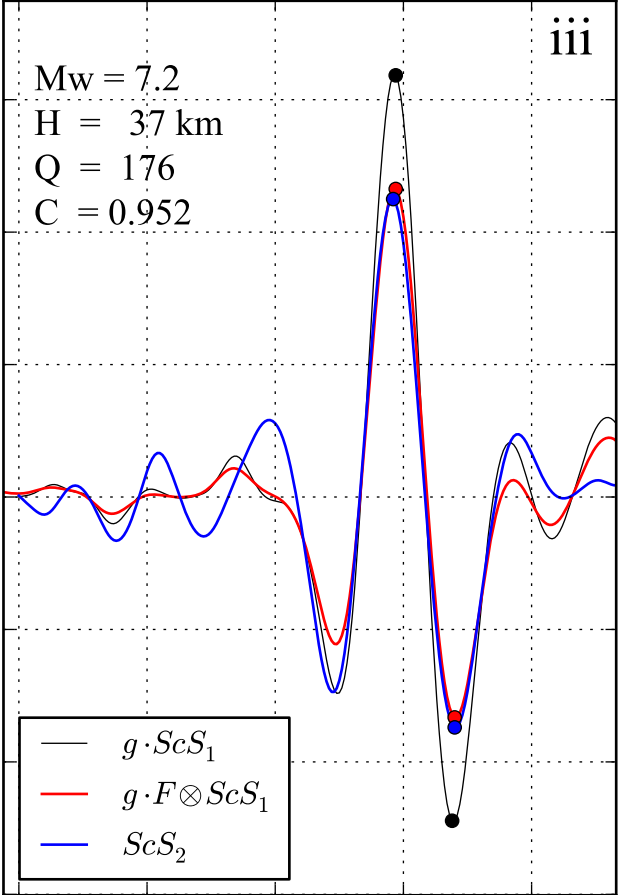

Time [s]

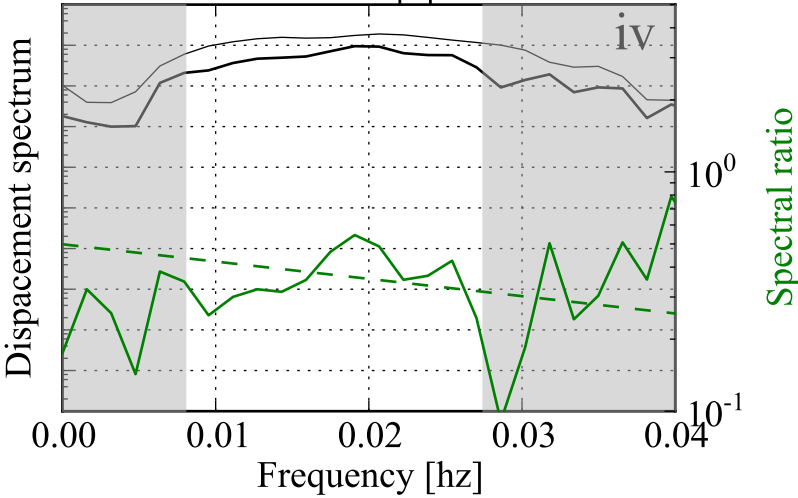

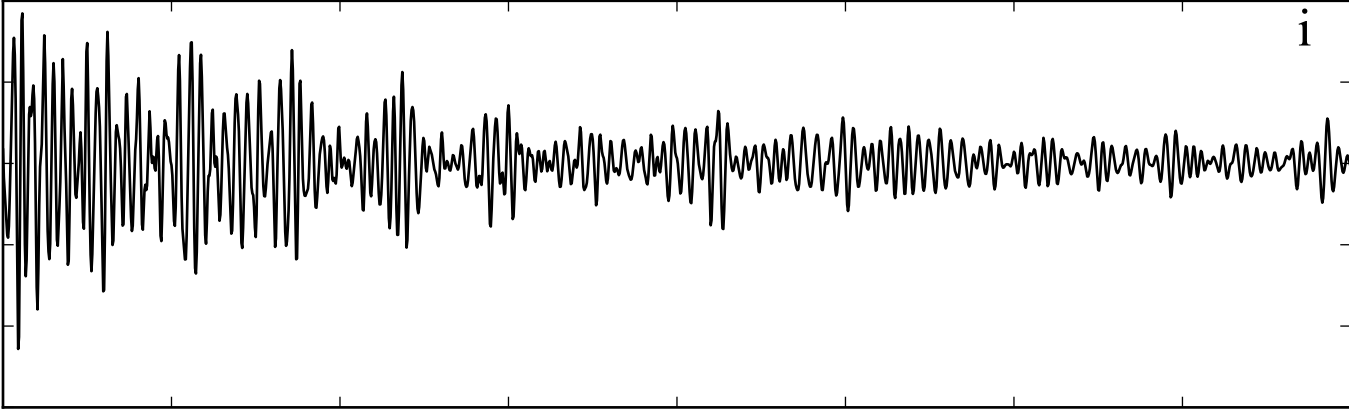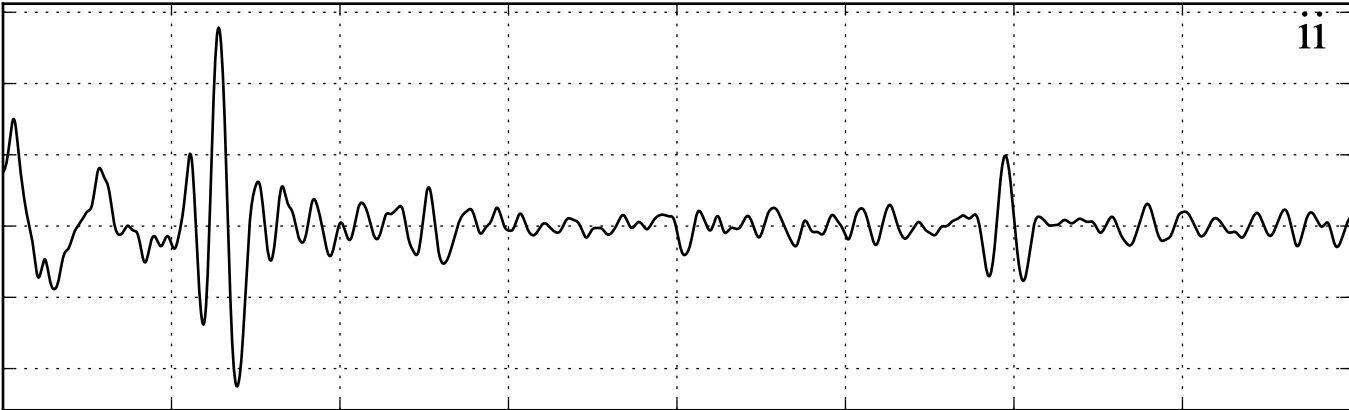

Time [s]

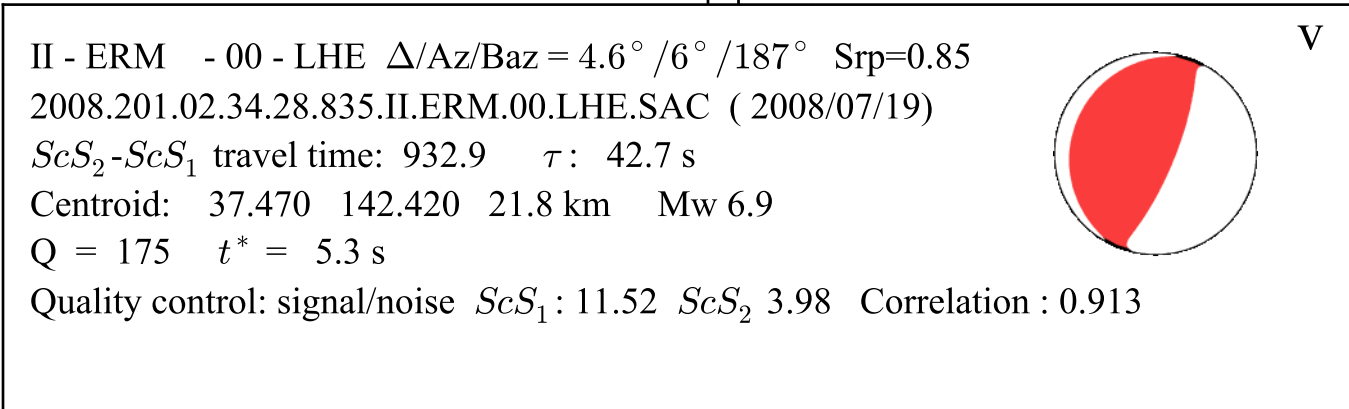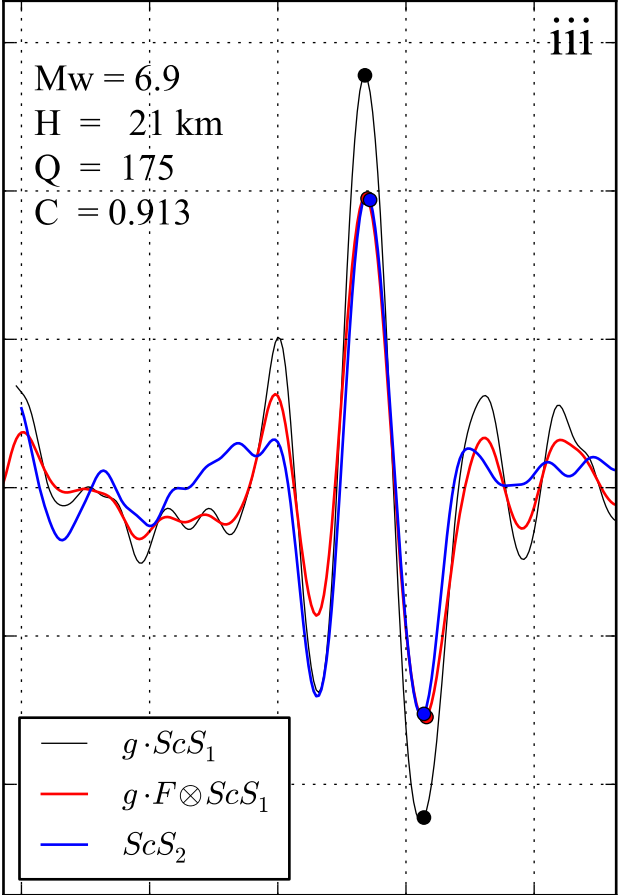

Time [s]

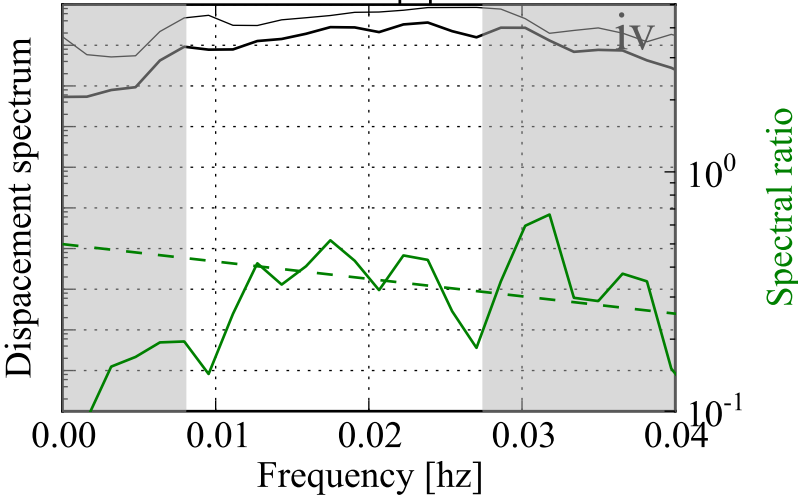

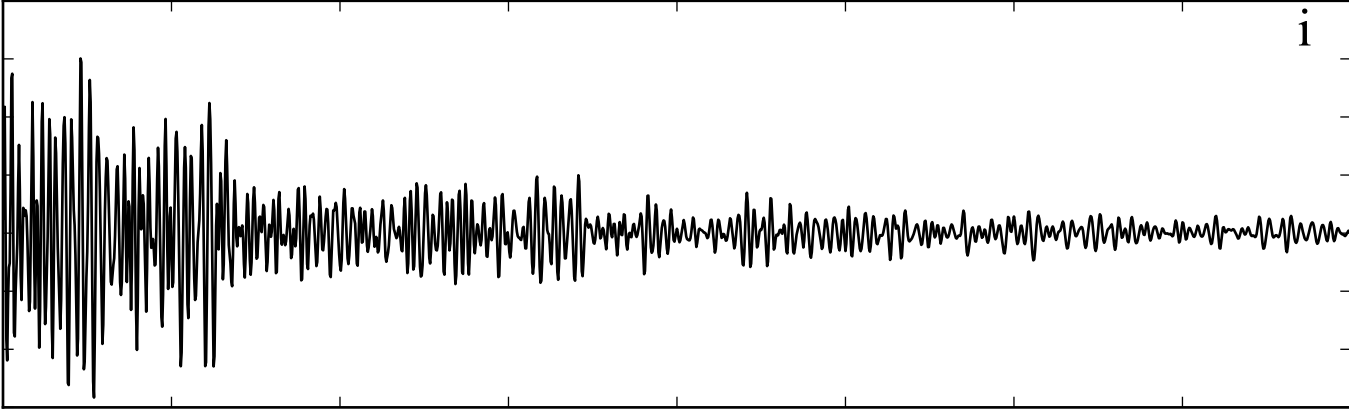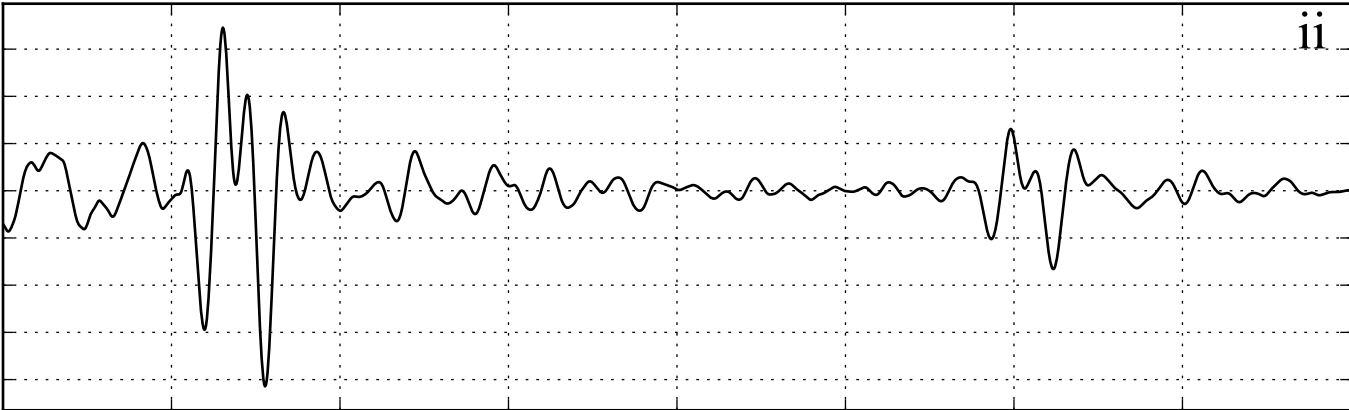

Time [s]

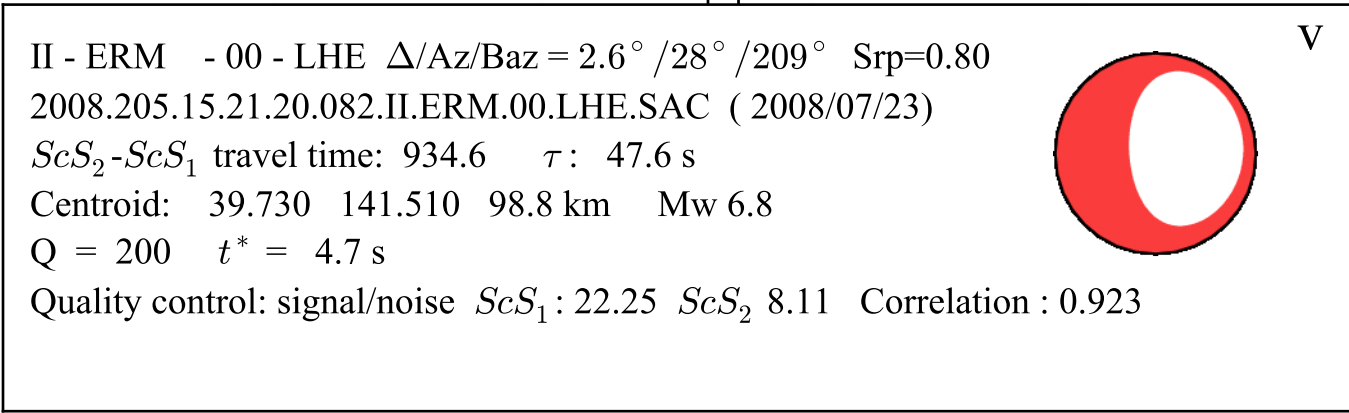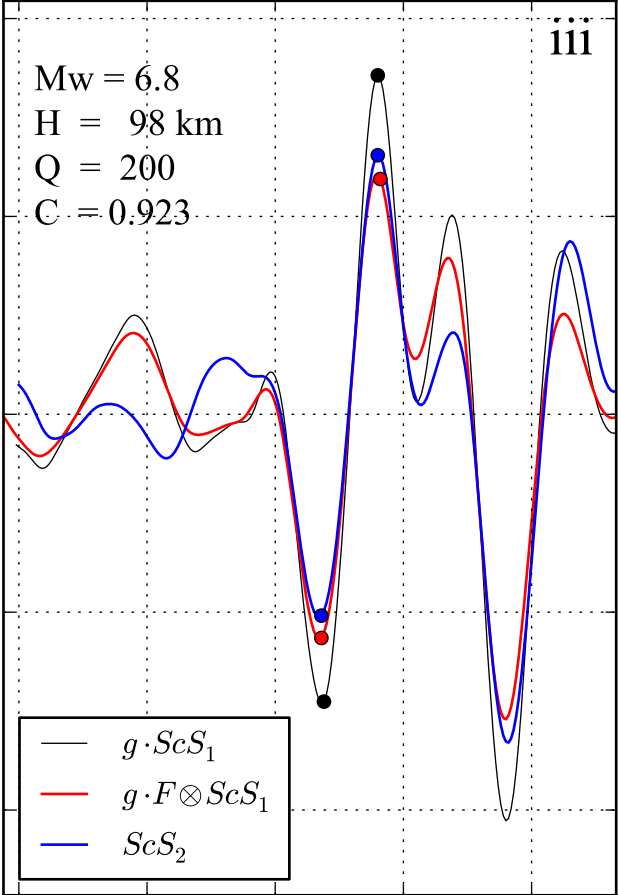

Time [s]

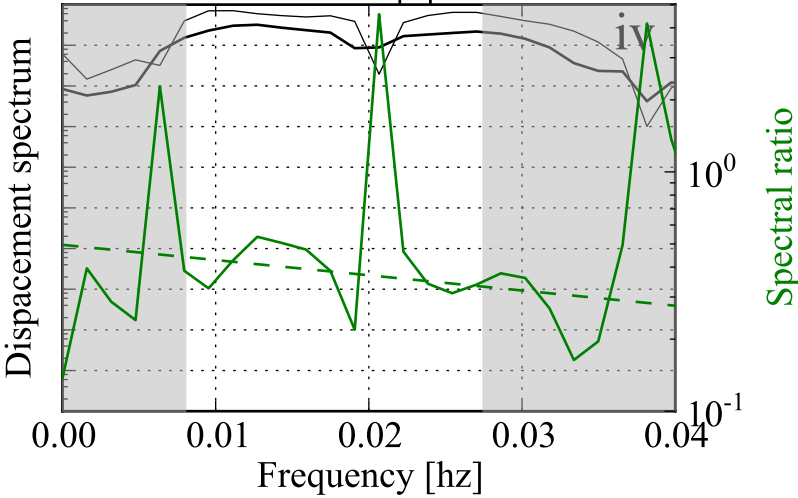

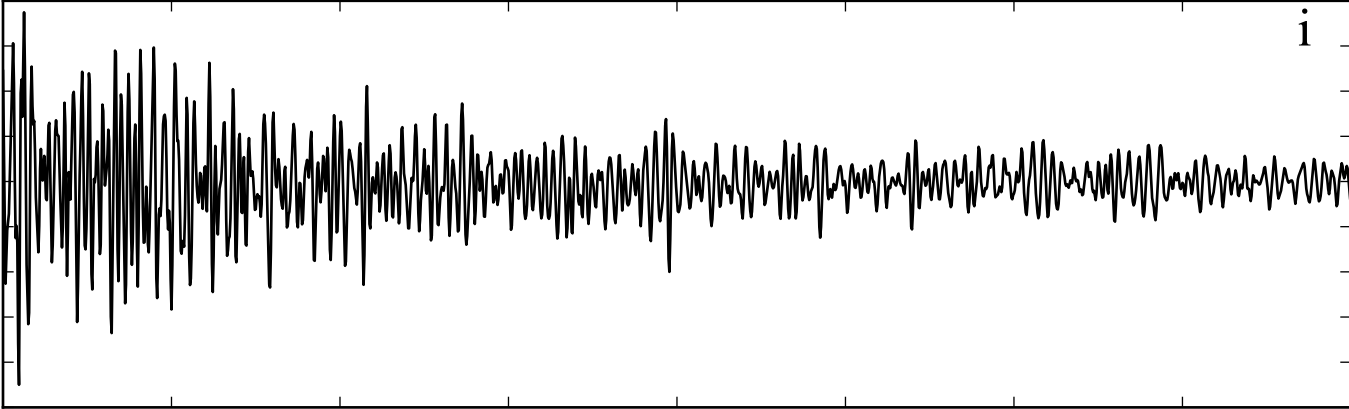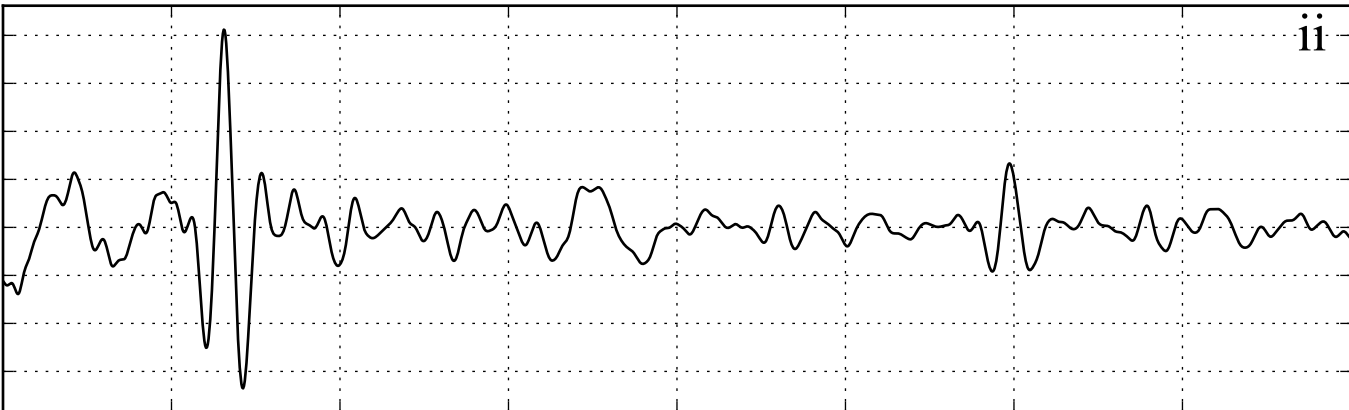

Time [s]

II - ERM - 00 - LHE  $\Delta/Az/Baz = 4.4^\circ/11^\circ/192^\circ$  Srp=0.67

2010.073.08.03.04.255.II.ERM.00.LHE.SAC (2010/03/14)

$ScS_2$ - $ScS_1$  travel time: 934.0  $\tau$ : 45.2 s

Centroid: 37.700 141.980 45.9 km Mw 6.5

Q = 164  $t^* = 5.7$  s

Quality control: signal/noise  $ScS_1$ : 11.20  $ScS_2$  3.80 Correlation : 0.956

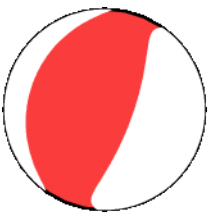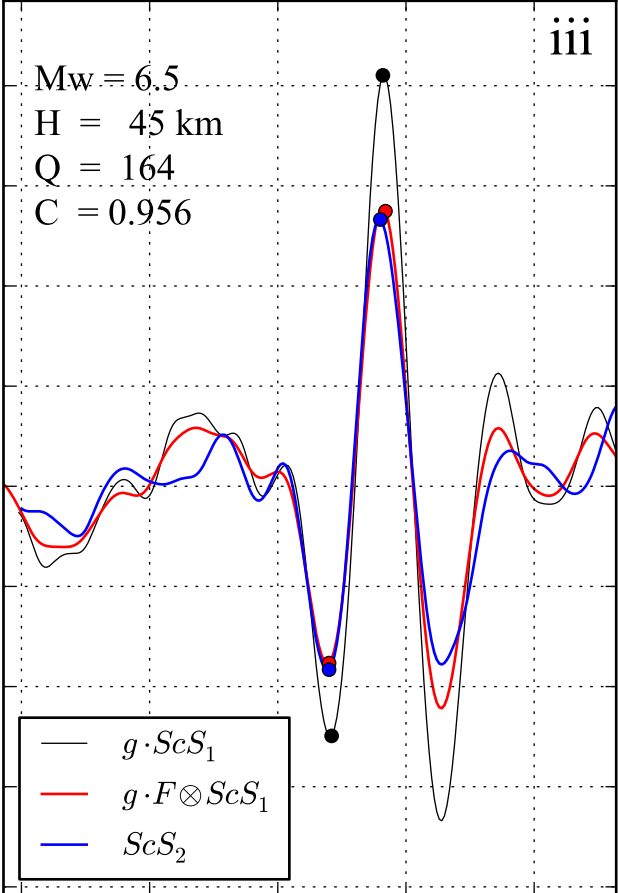

Time [s]

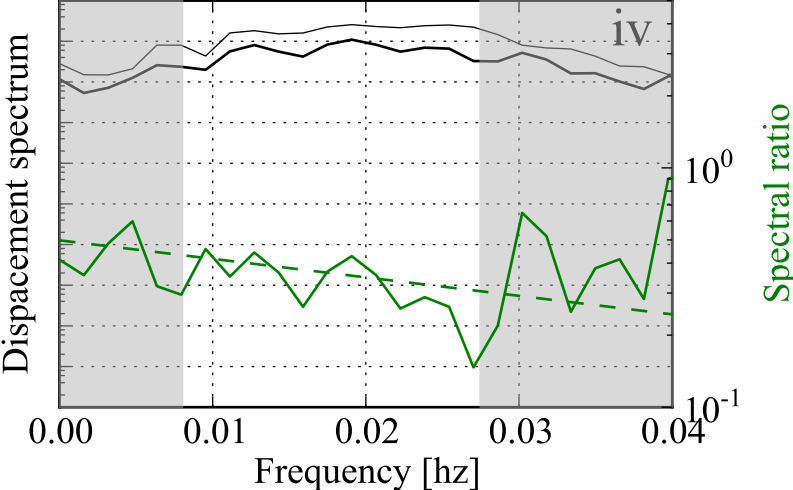

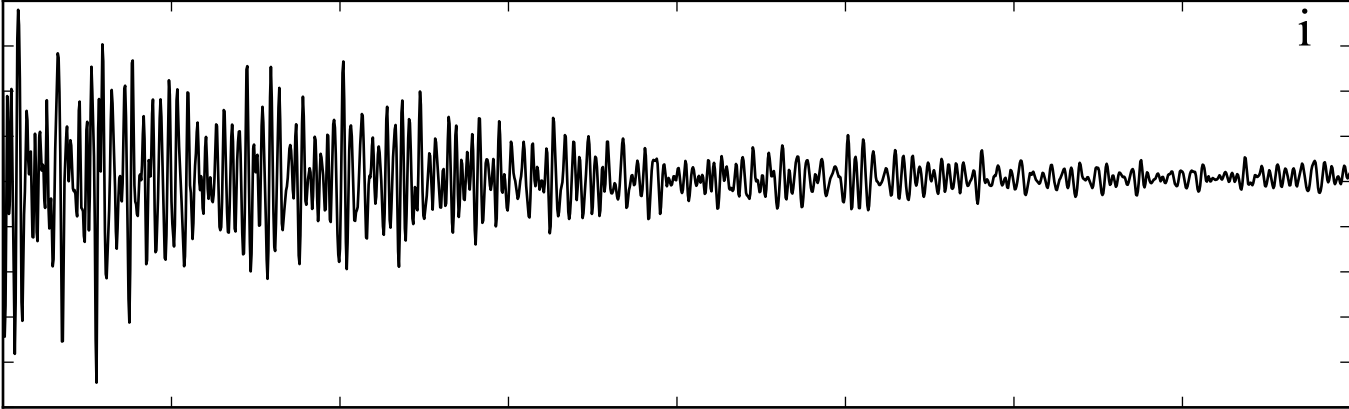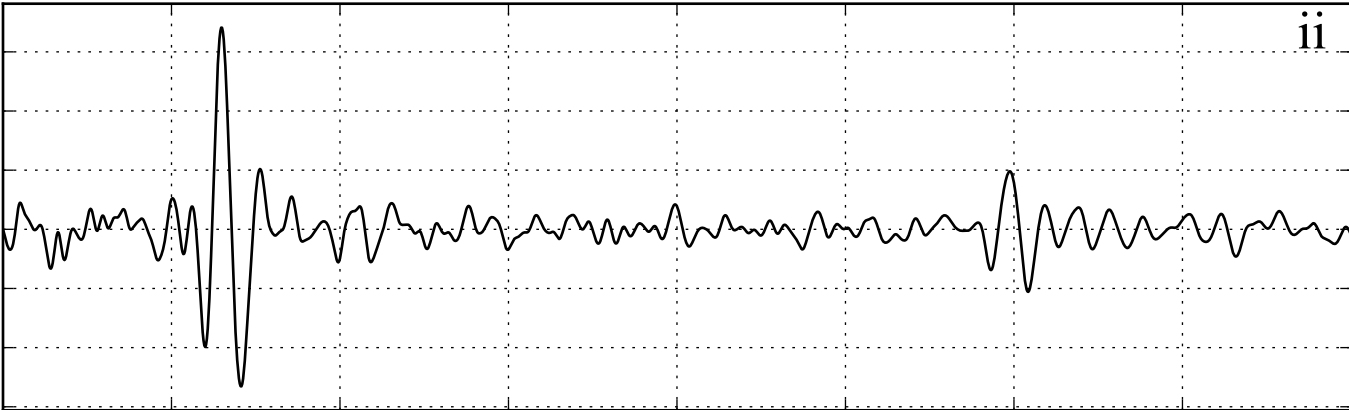

Time [s]

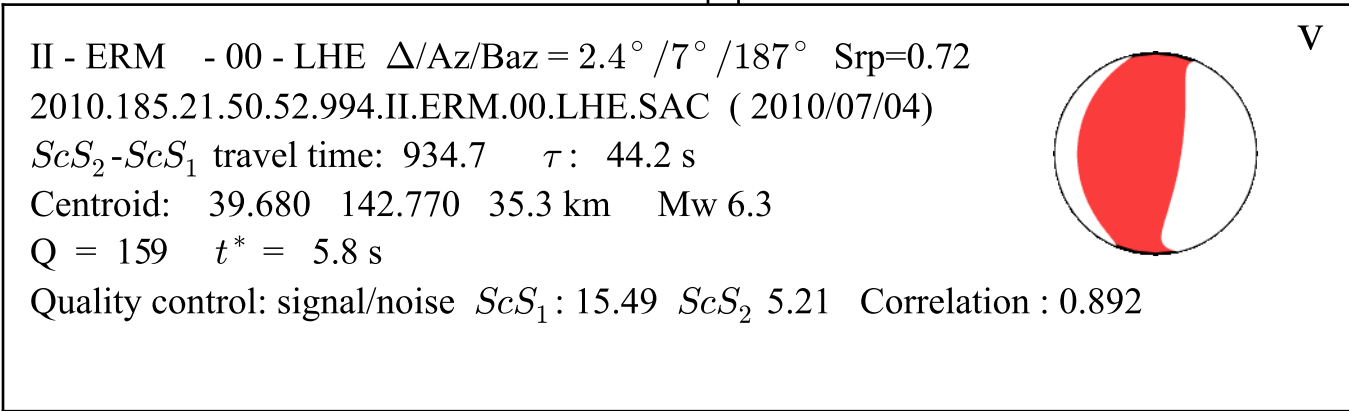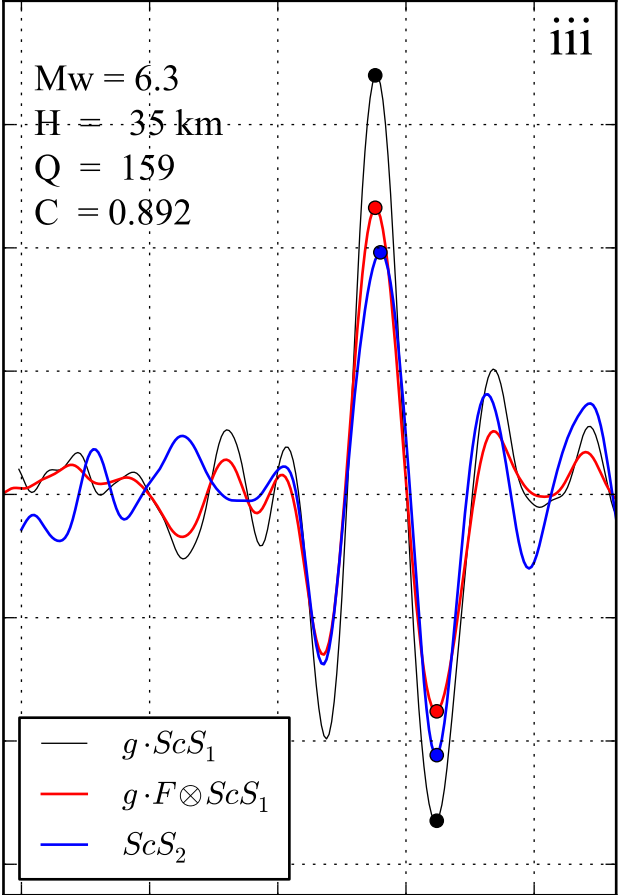

Time [s]

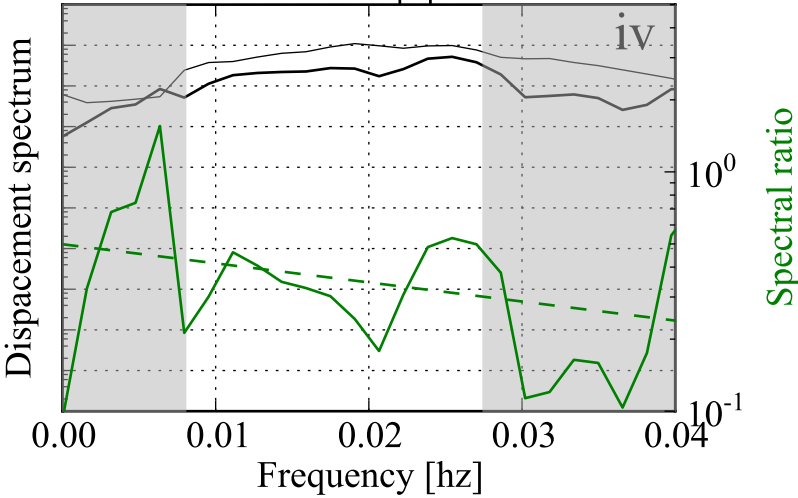

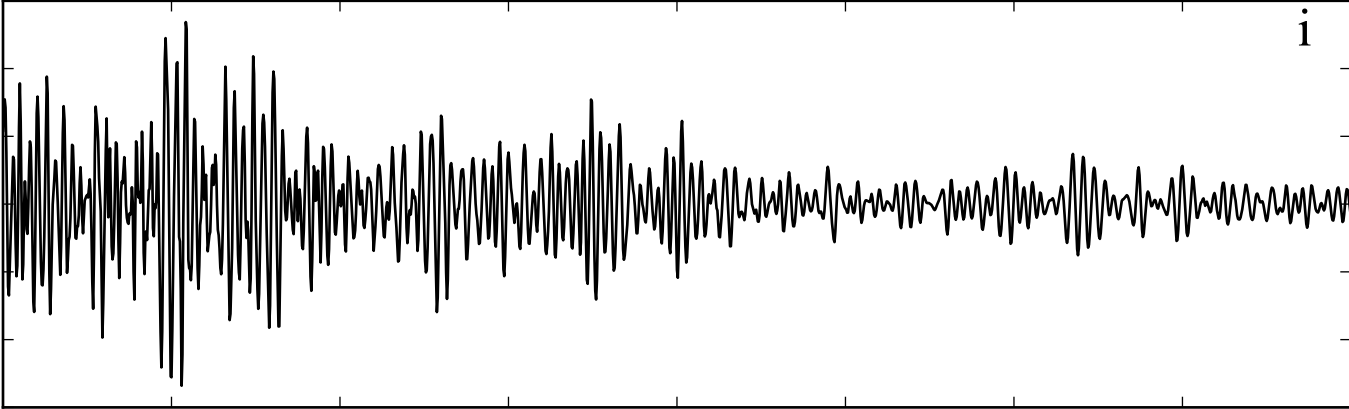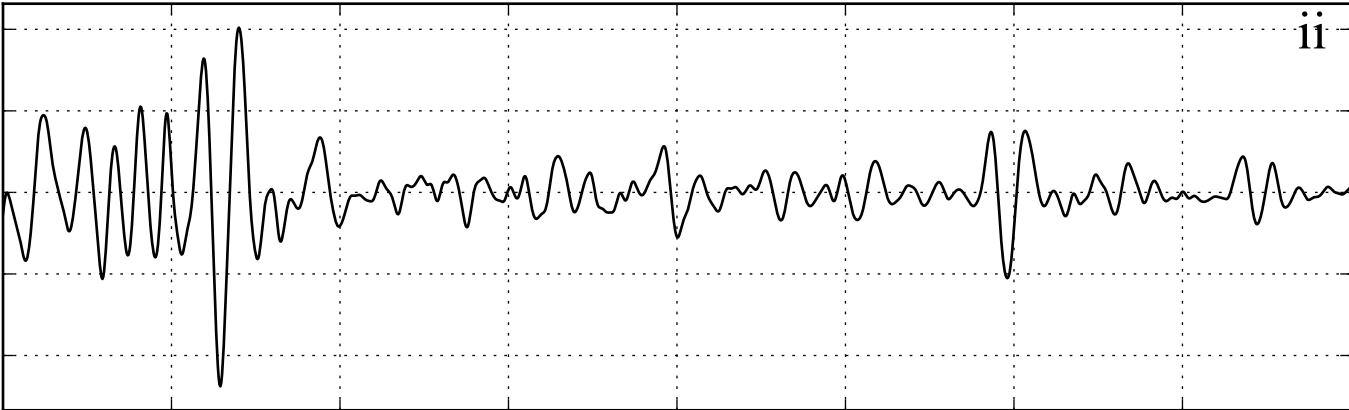

Time [s]

II - ERM - 00 - LHN  $\Delta/Az/Baz = 3.5^\circ / 4^\circ / 184^\circ$   $Srp=0.92$   
2011.068.02.40.20.592.II.ERM.00.LHN.SAC ( 2011/03/09)  
 $ScS_2-ScS_1$  travel time: 935.4  $\tau$ : 43.6 s  
Centroid: 38.560 142.780 14.1 km Mw 7.3  
 $Q = 344$   $t^* = 2.7$  s  
Quality control: signal/noise  $ScS_1$ : 8.59  $ScS_2$  3.53 Correlation : 0.867

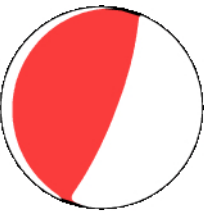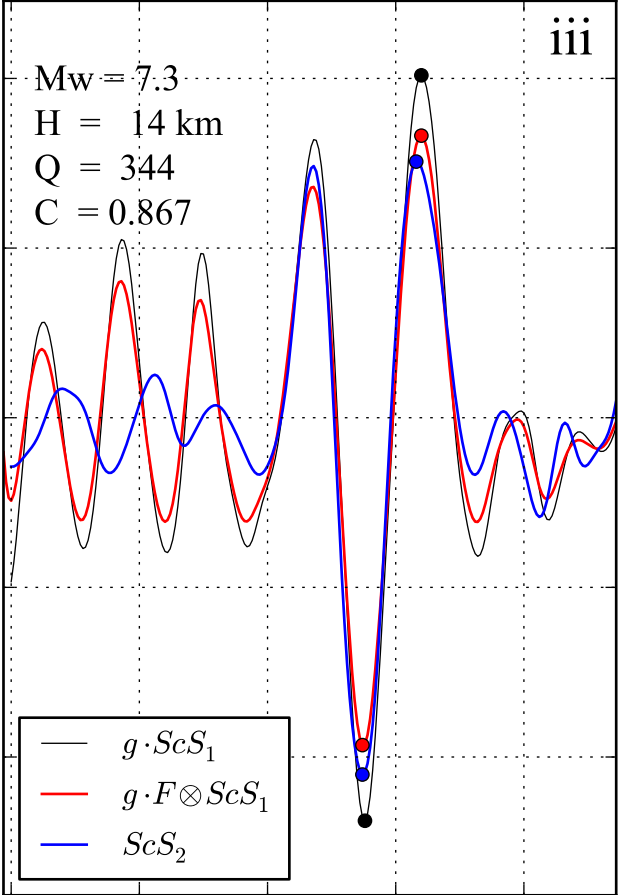

Time [s]

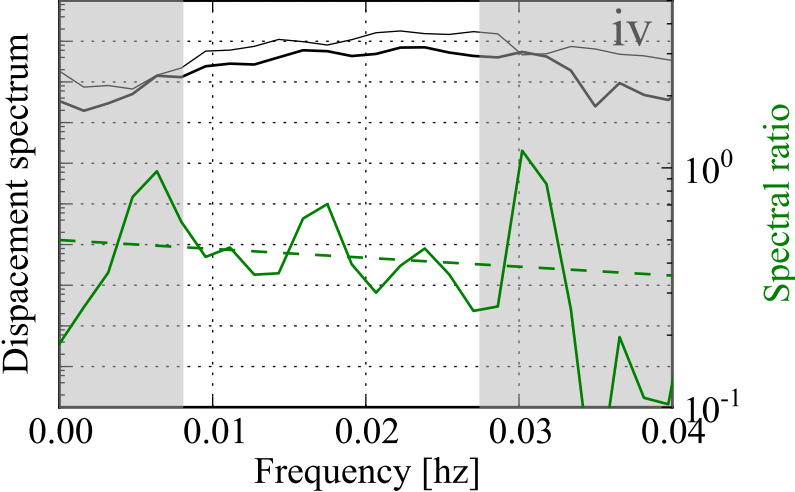

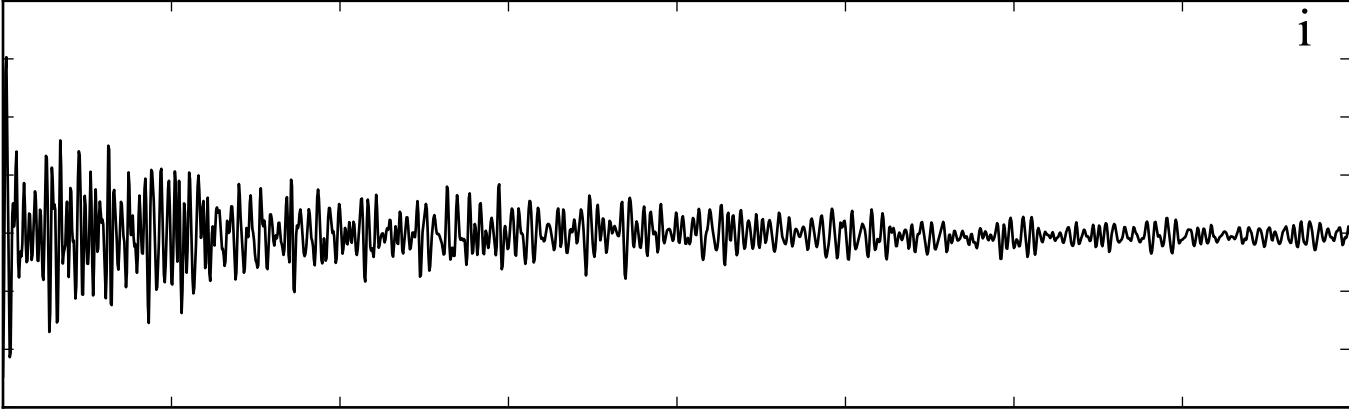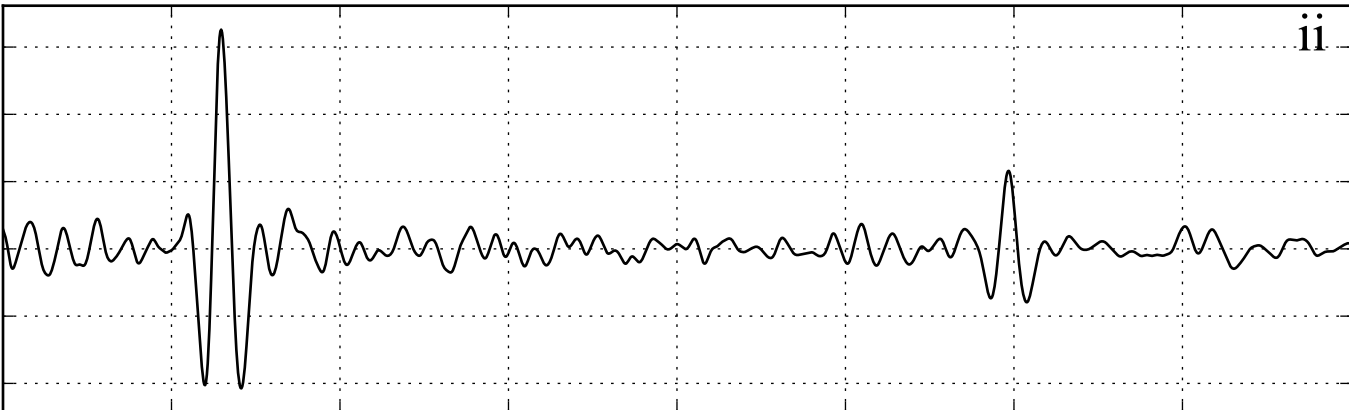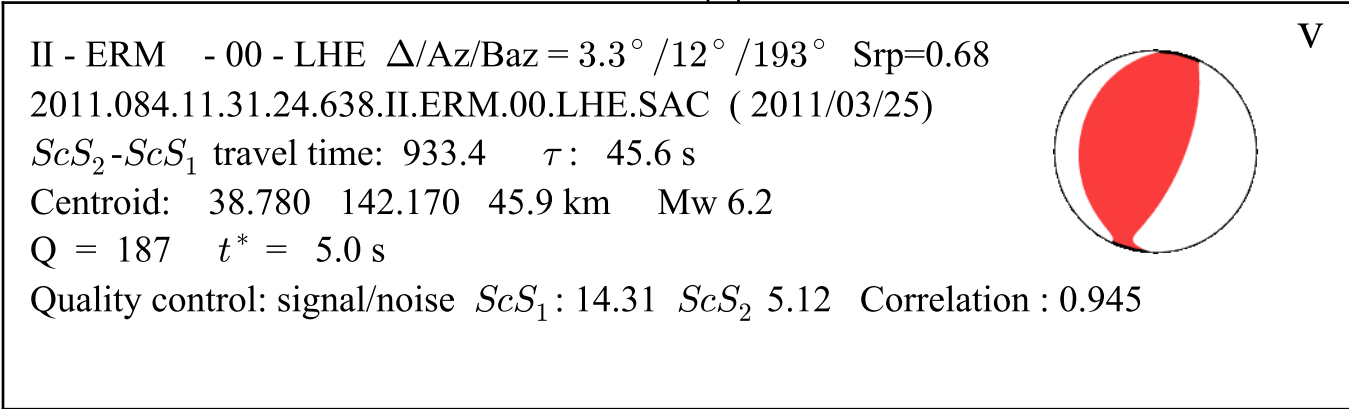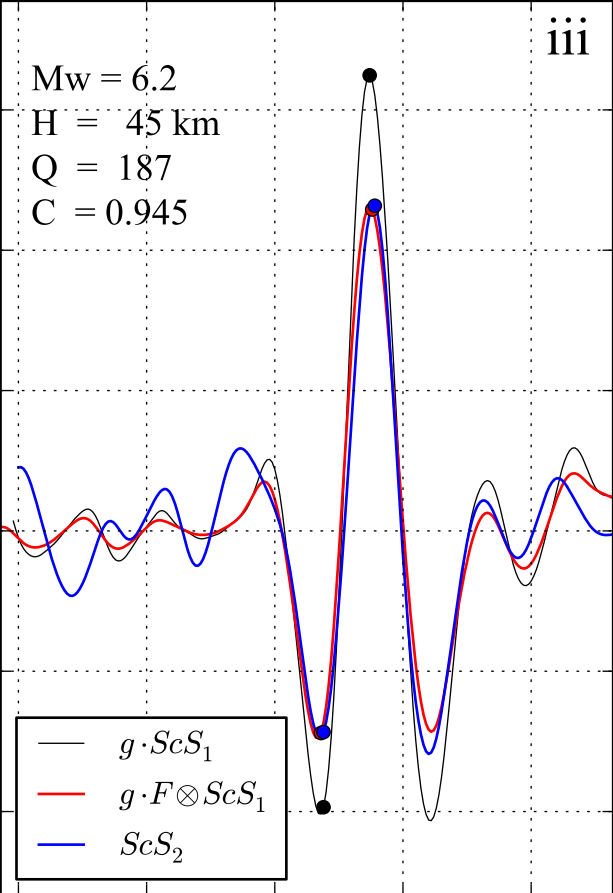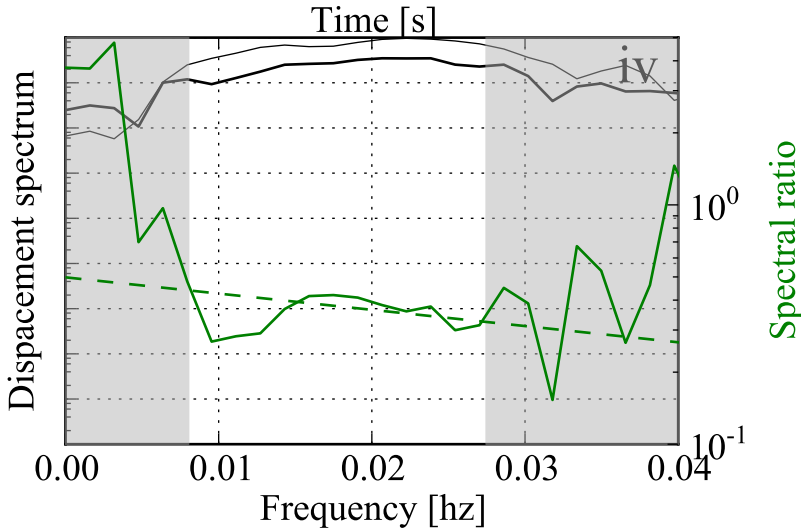



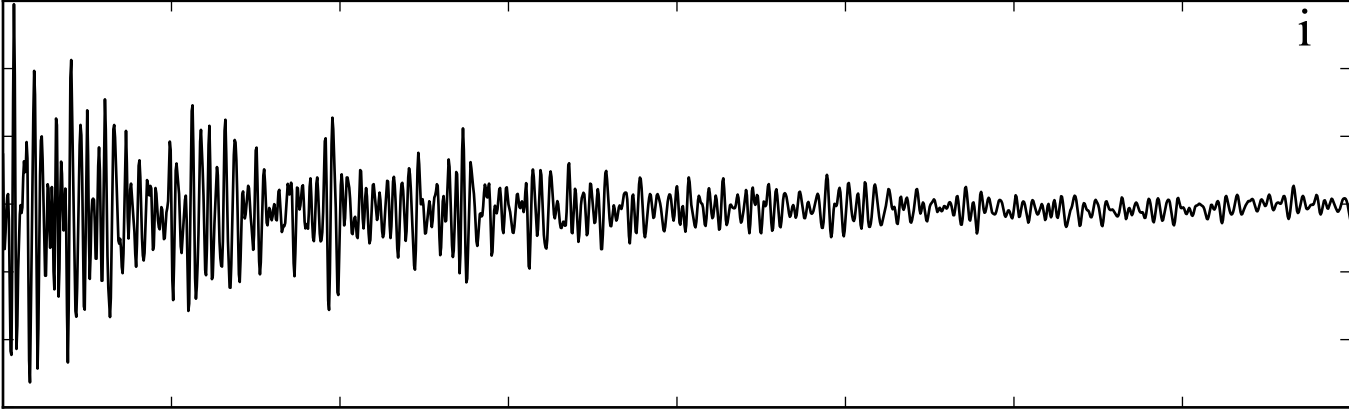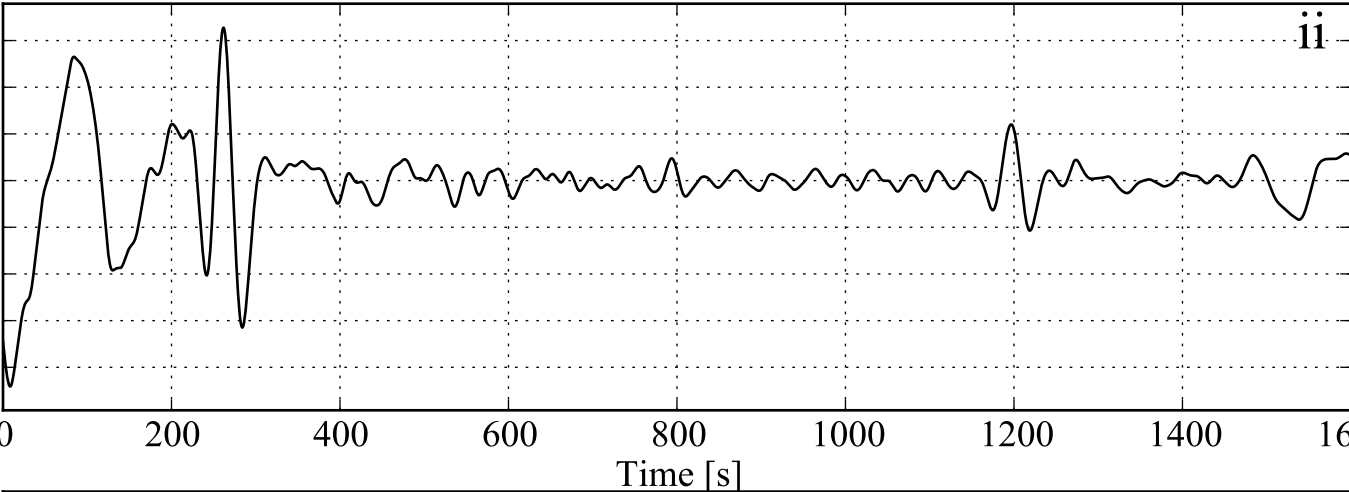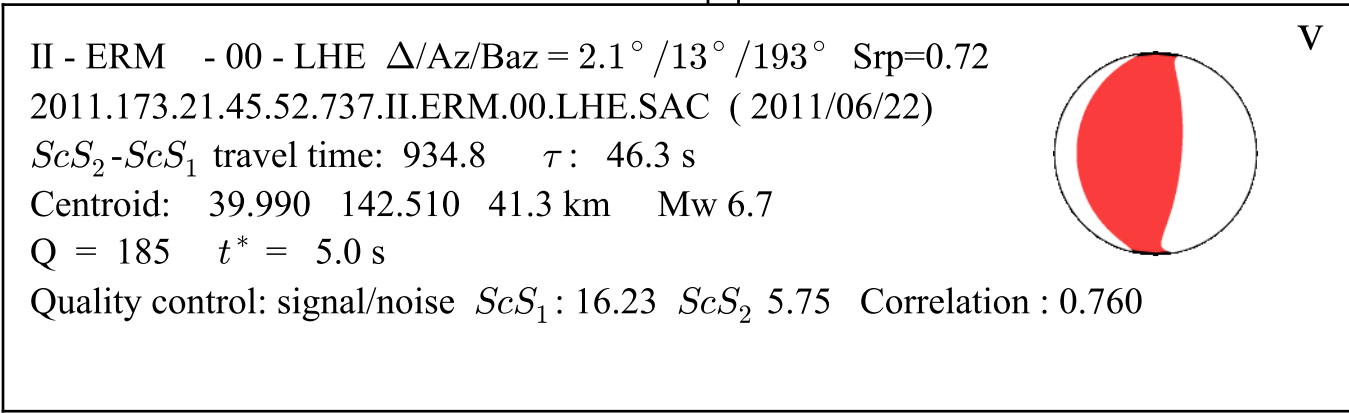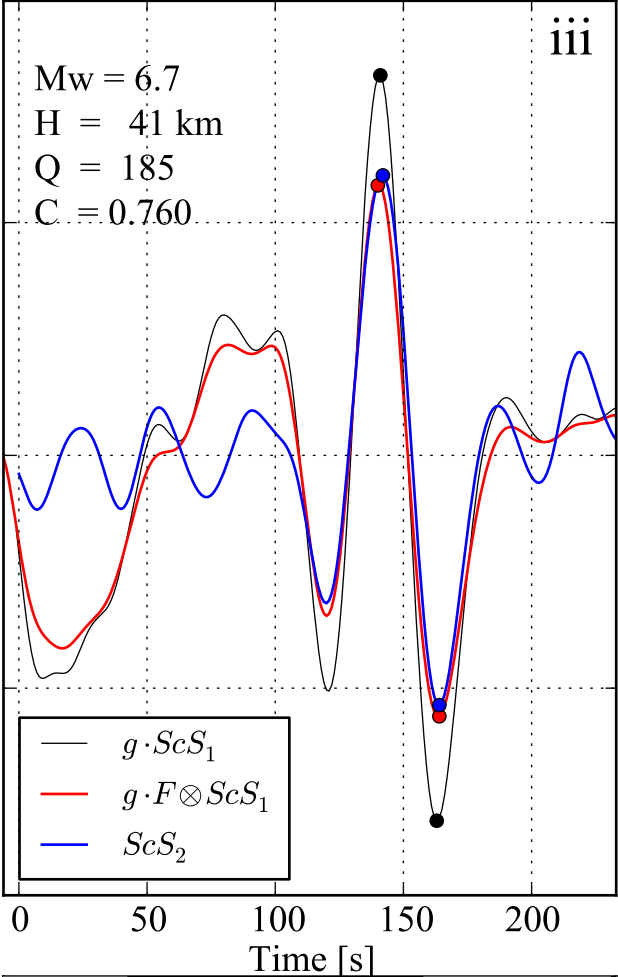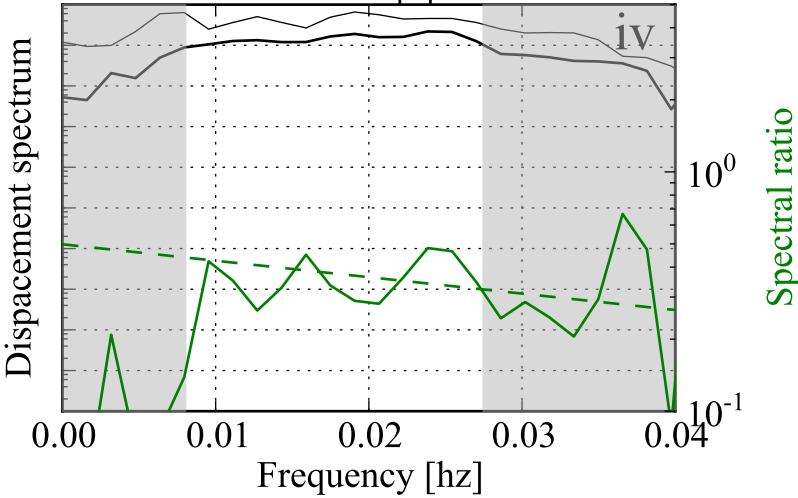

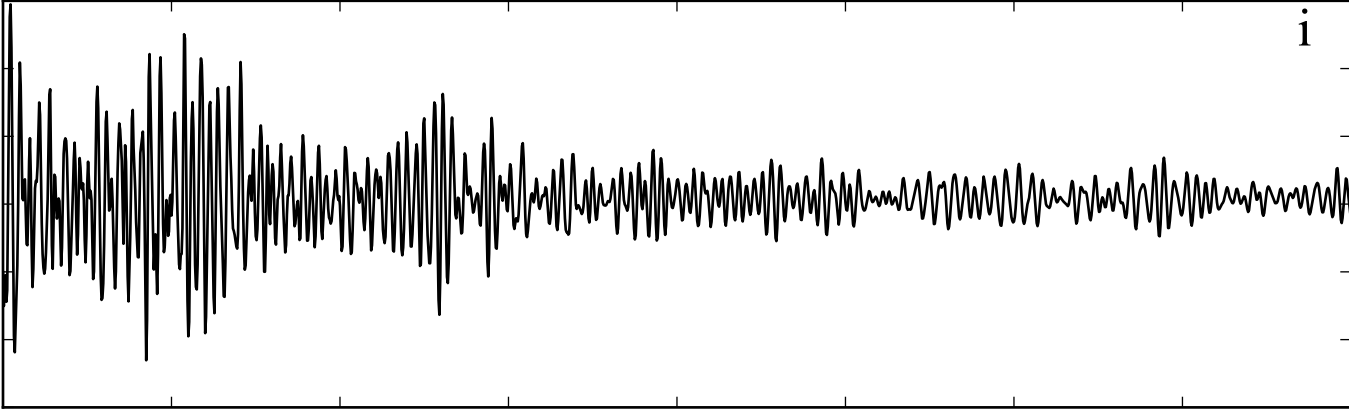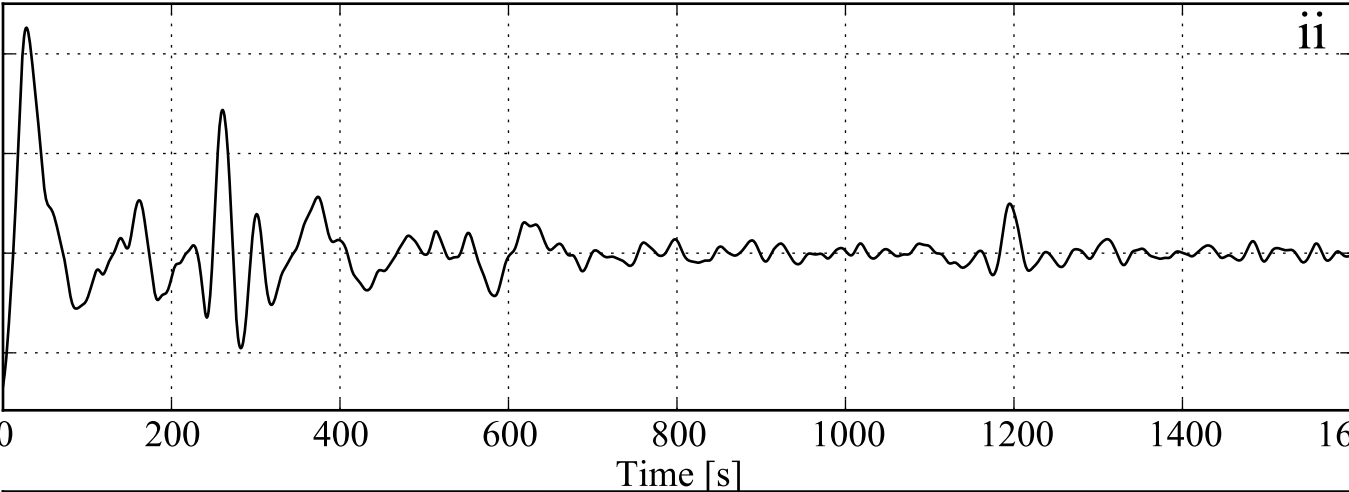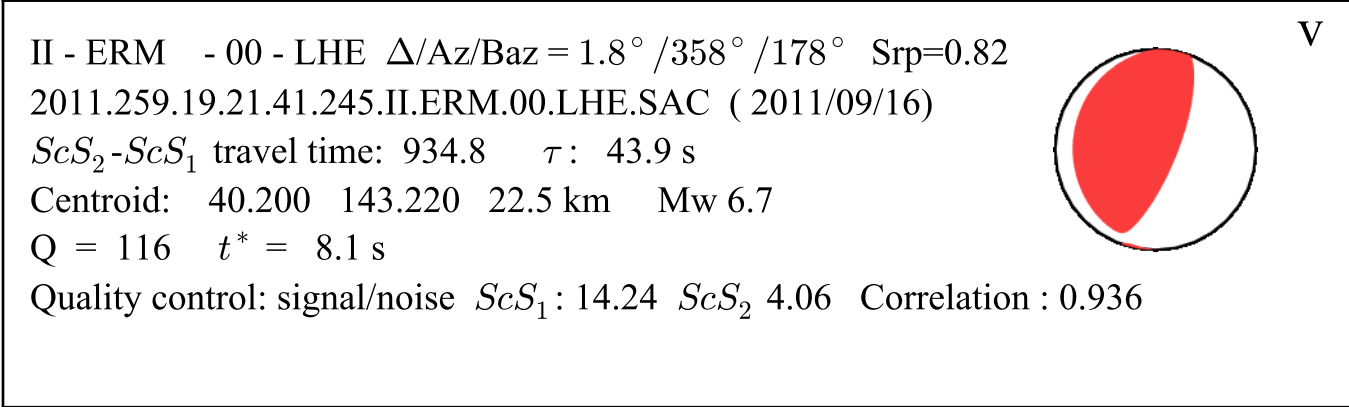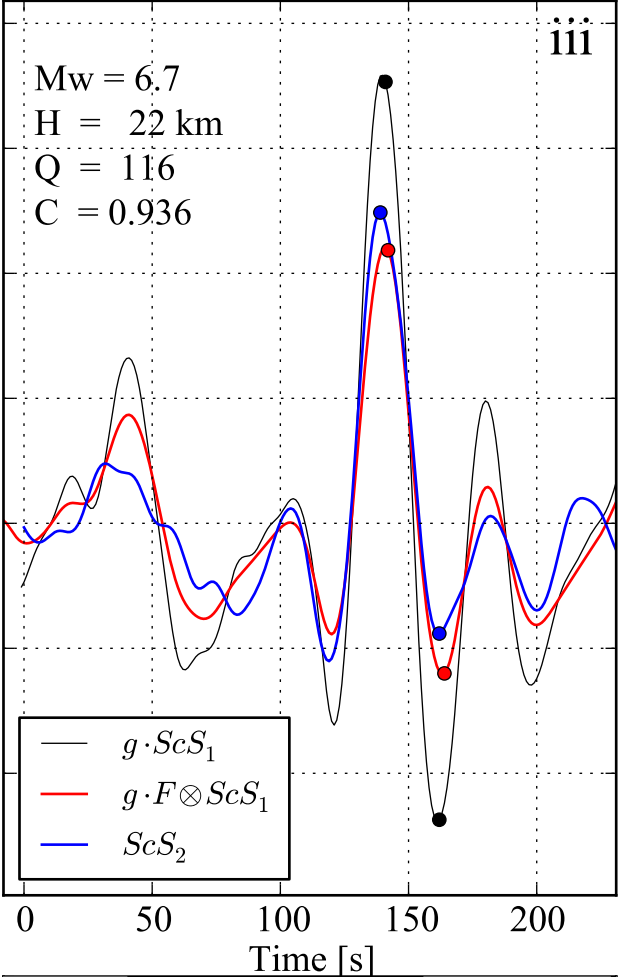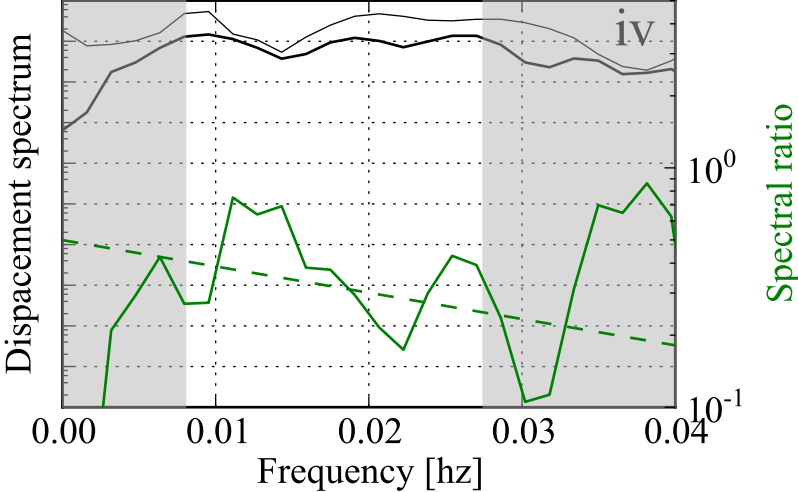

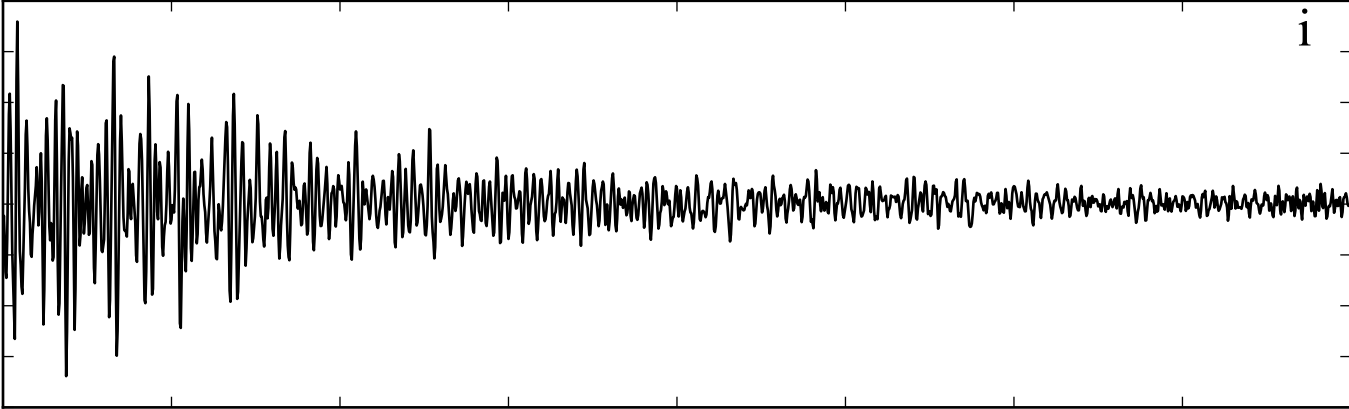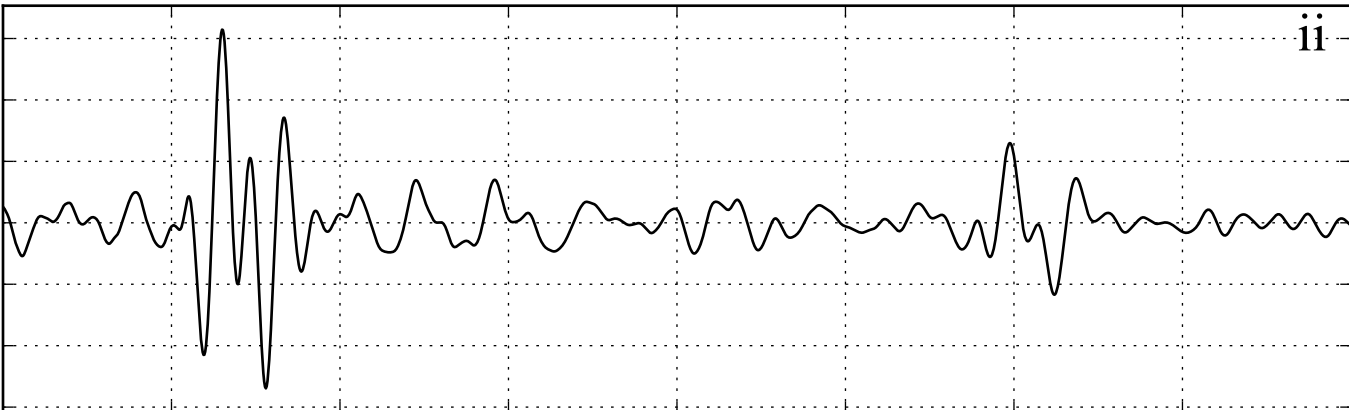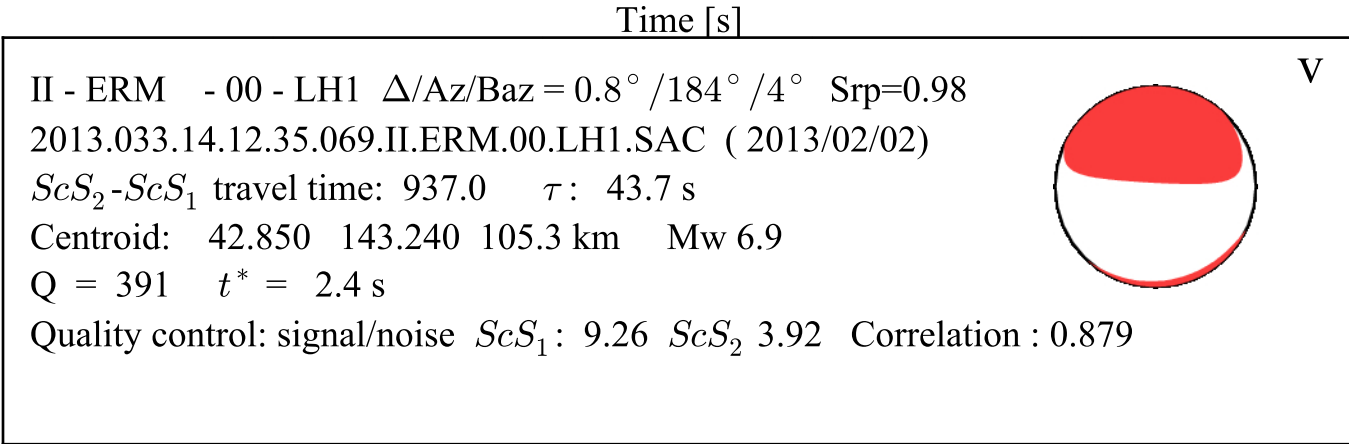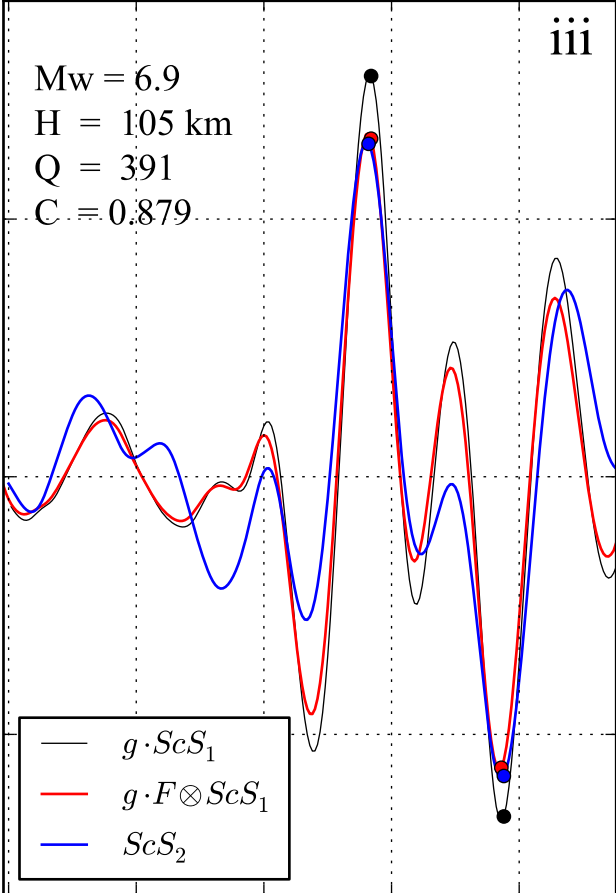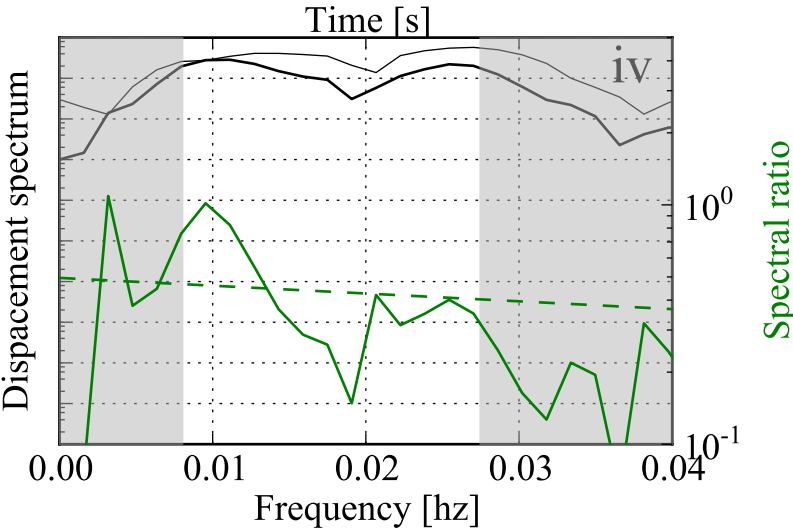

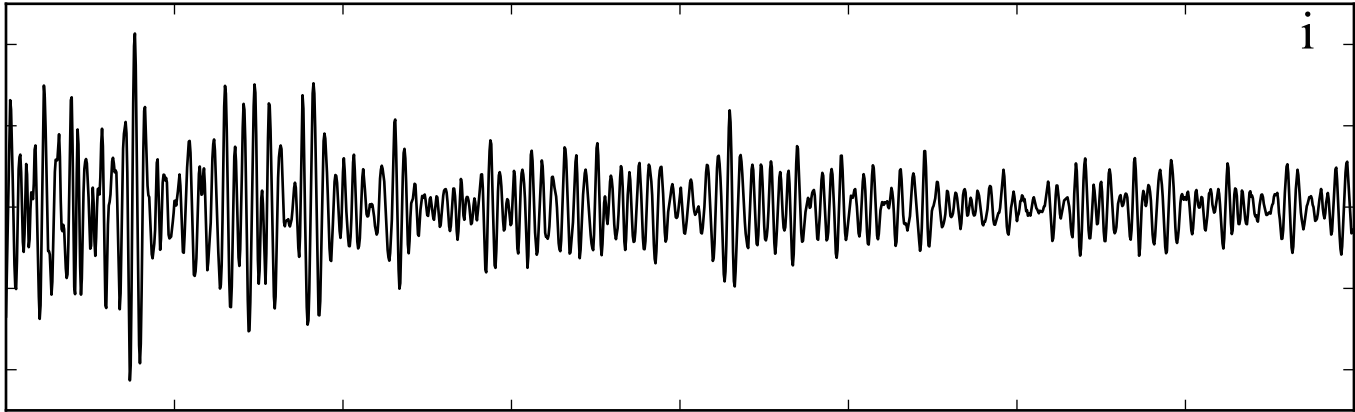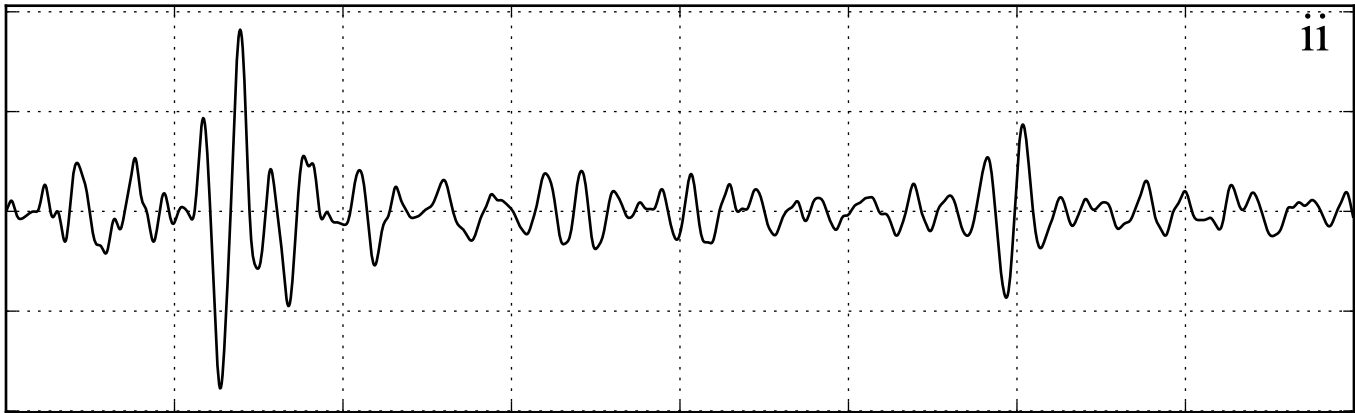

Time [s]

II - ERM - 10 - LH2  $\Delta/Az/Baz = 5.0^\circ / 346^\circ / 166^\circ$  Srp=0.24  
2013.298.17.05.19.069.II.ERM.10.LH2.SAC (2013/10/25)  
 $ScS_2$ - $ScS_1$  travel time: 931.8  $\tau$ : 44.3 s  
Centroid: 37.170 144.660 24.9 km Mw 7.1  
 $Q = 1400^*$   $t^* = 0.5$  s  
Quality control: signal/noise  $ScS_1$ : 8.26  $ScS_2$  3.99 Correlation : 0.890

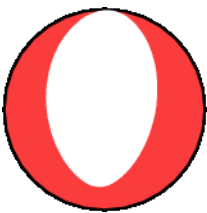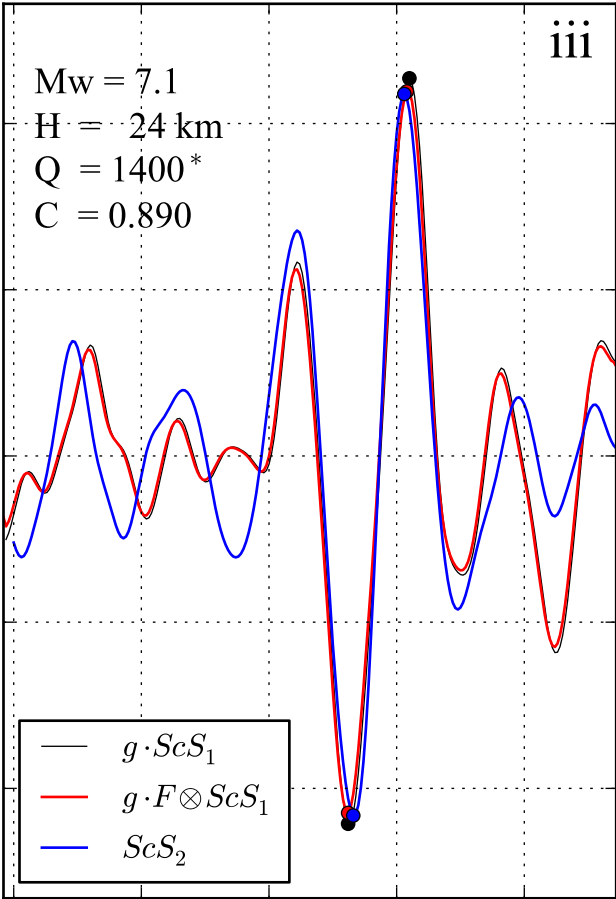

Time [s]

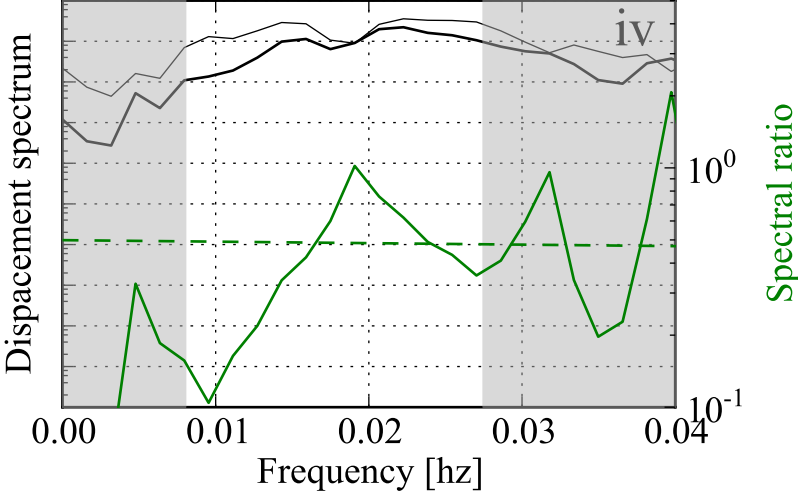

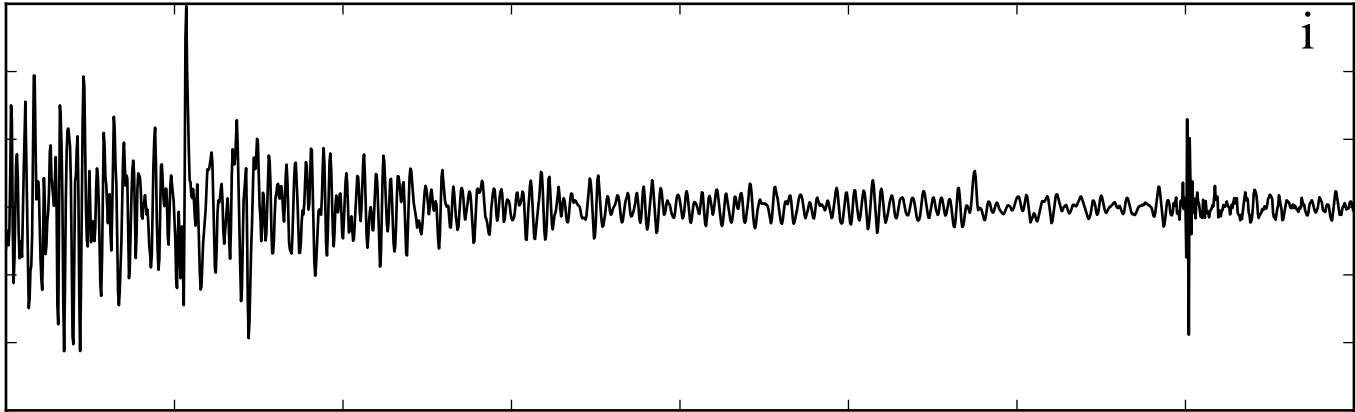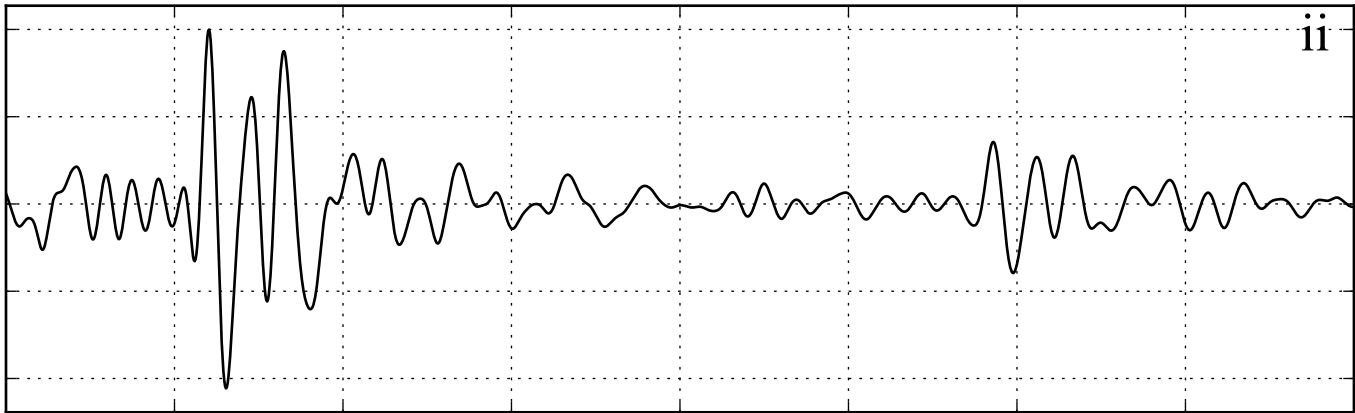

Time [s]

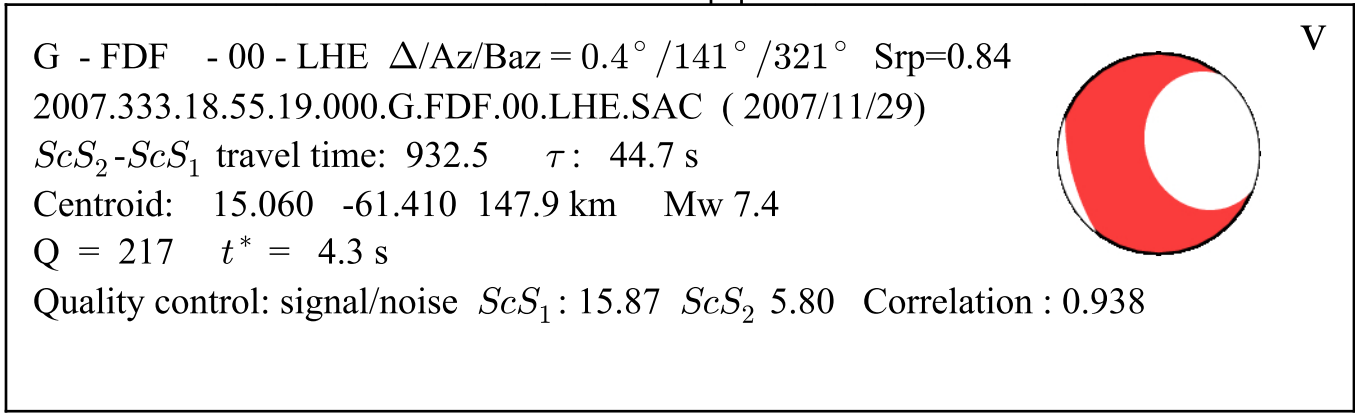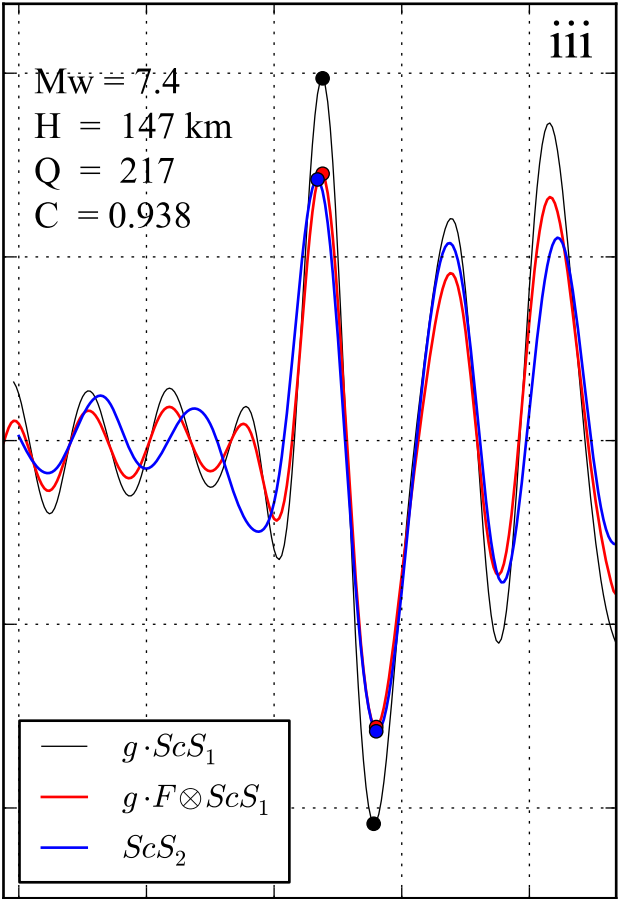

Time [s]

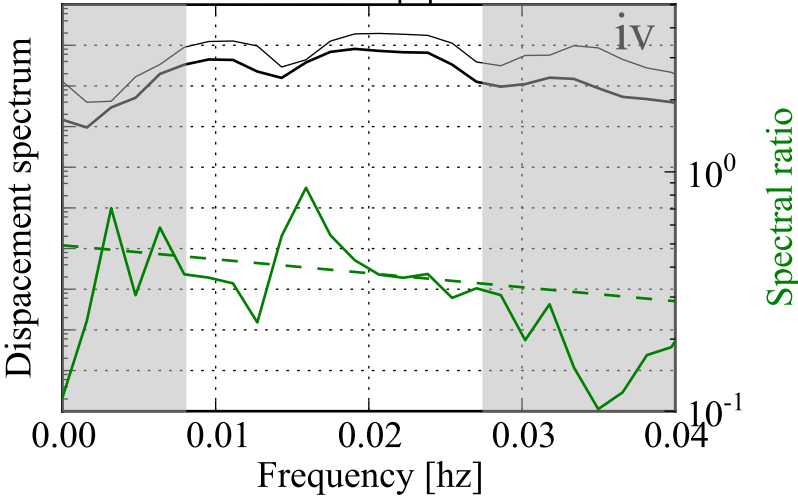

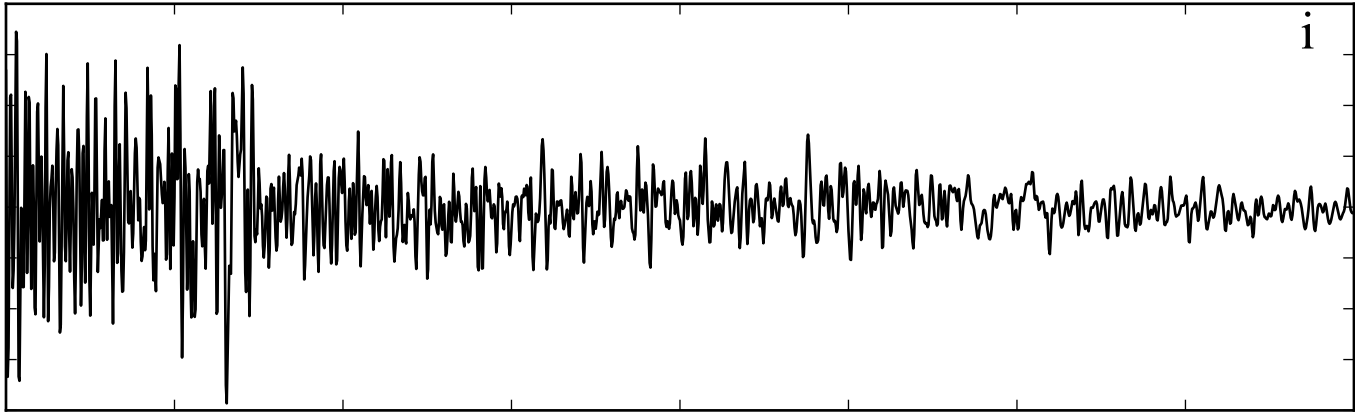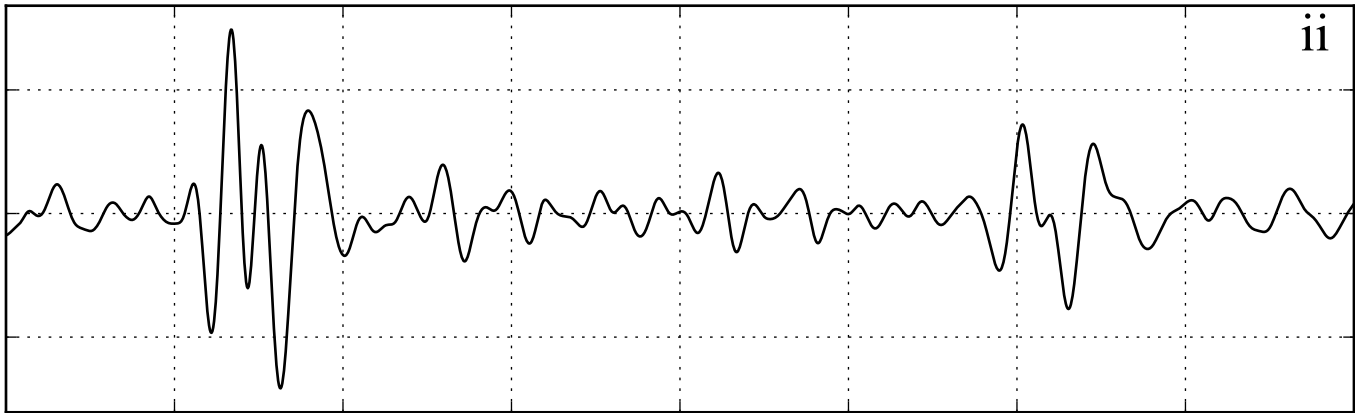

Time [s]

II - GAR - 00 - LHN  $\Delta/Az/Baz = 3.0^\circ/1^\circ/181^\circ$   $Srp=0.84$   
1991.031.22.58.34.000.II.GAR.00.LHN.SAC ( 1991/01/31)  
 $ScS_2-ScS_1$  travel time: 936.3  $\tau$ : 47.0 s  
Centroid: 36.010 70.230 126.1 km Mw 6.8  
 $Q = 1400^*$   $t^* = 0.3$  s  
Quality control: signal/noise  $ScS_1$ : 7.12  $ScS_2$  3.44 Correlation : 0.888

v



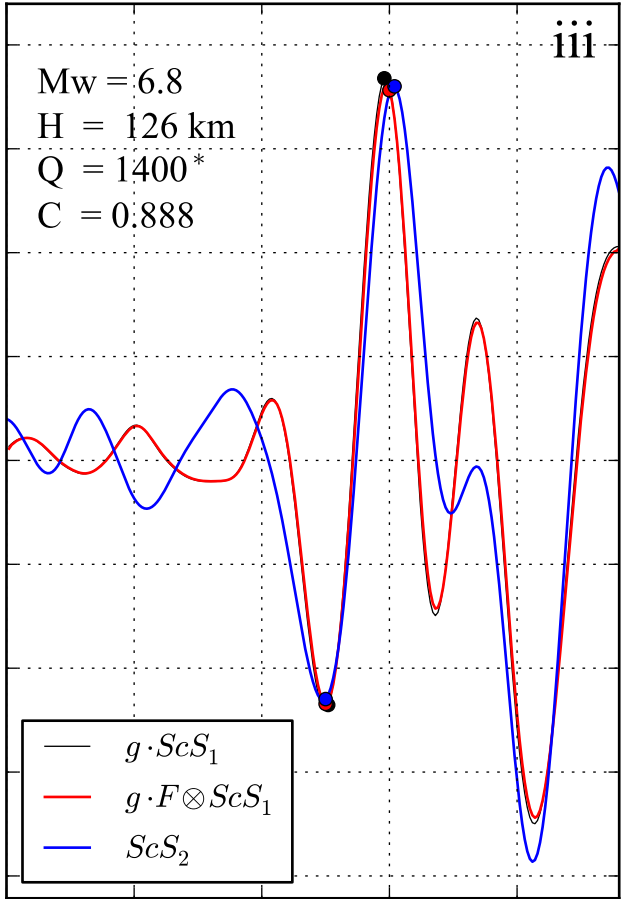

Time [s]

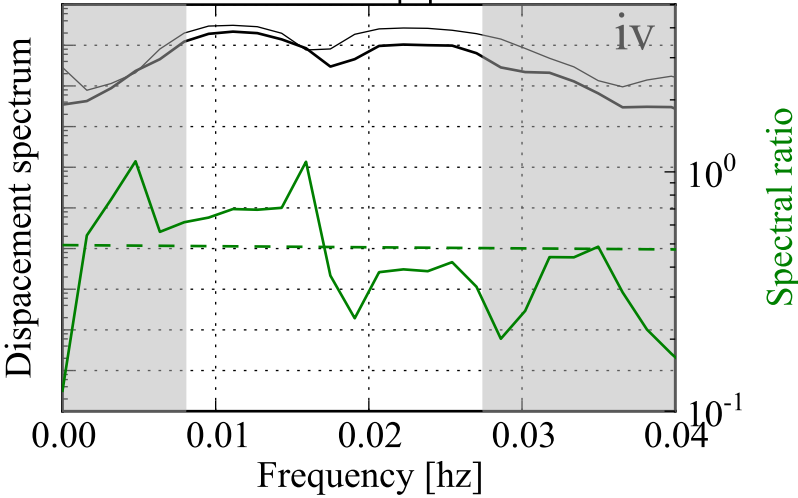

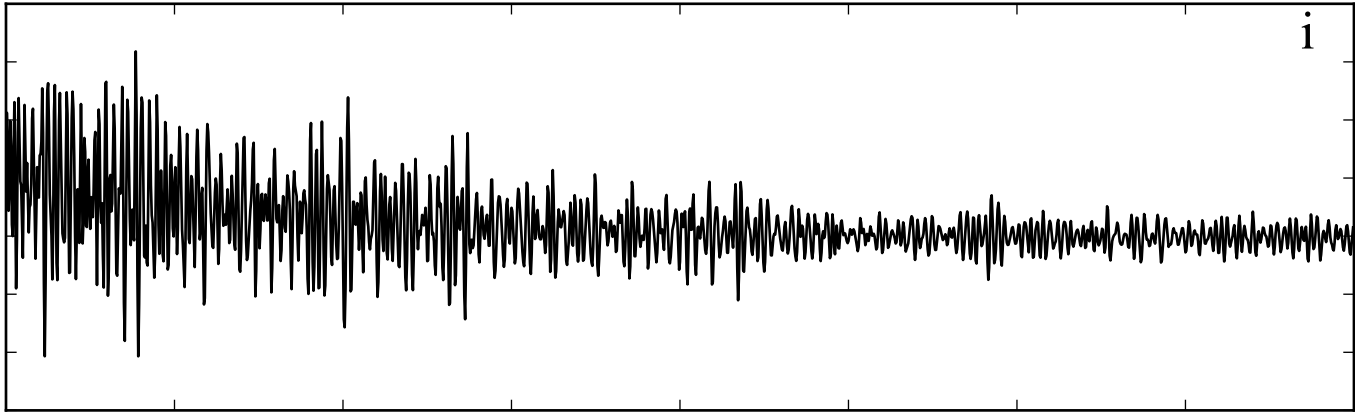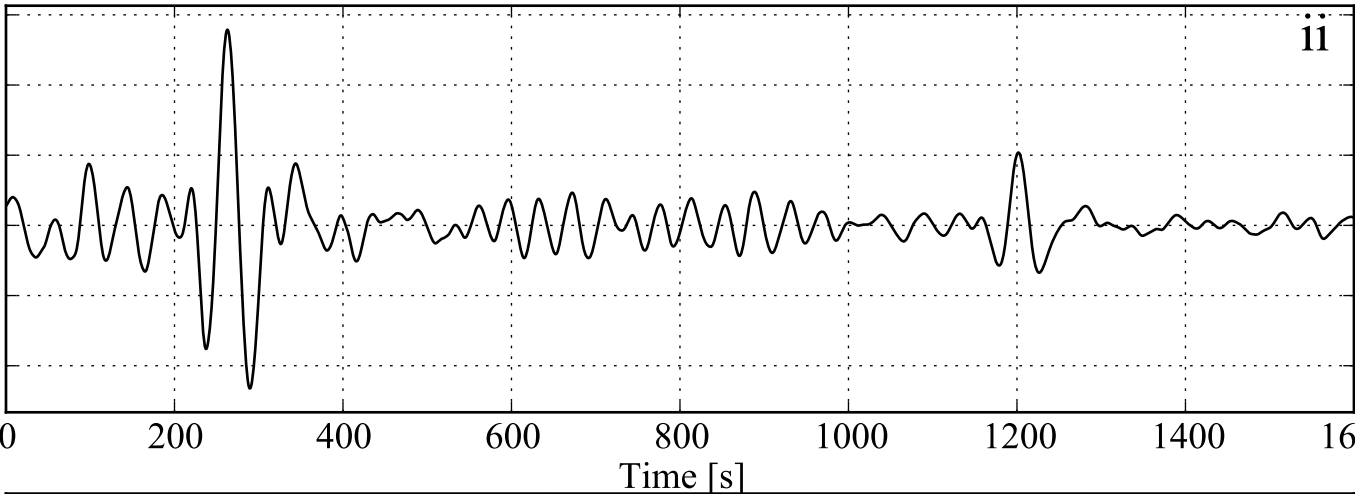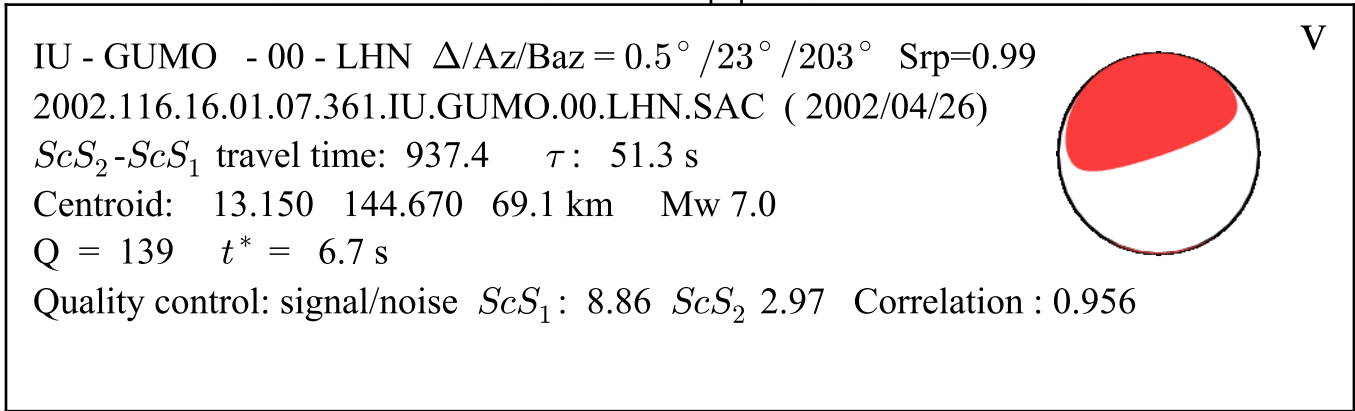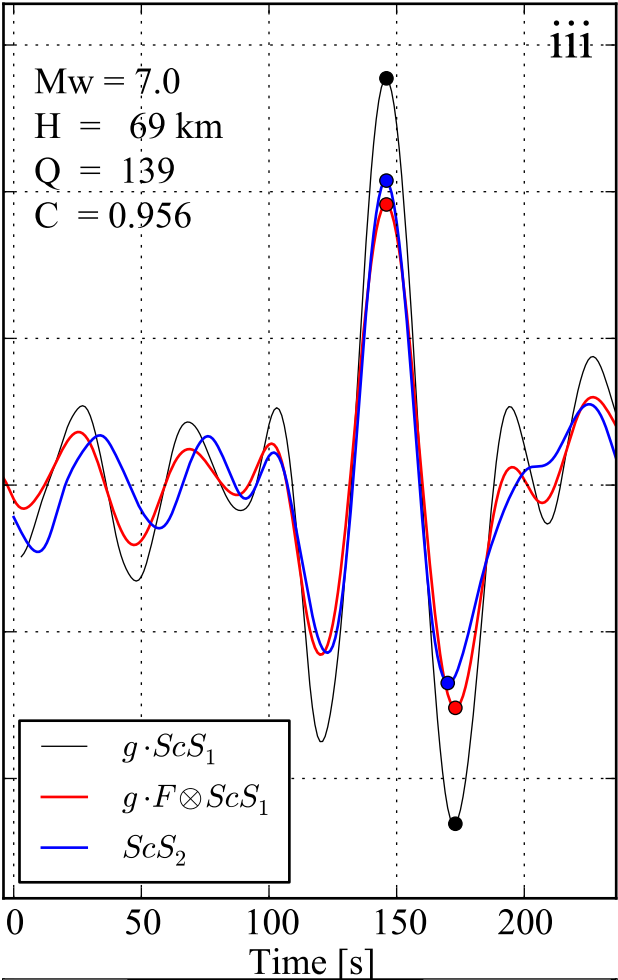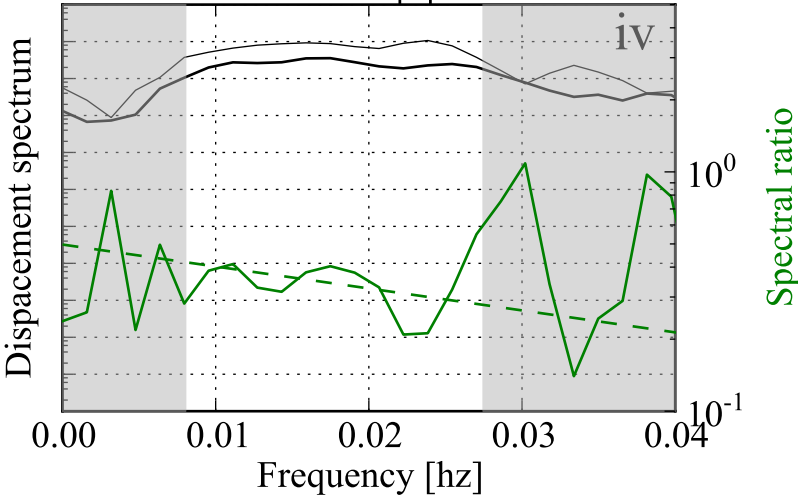

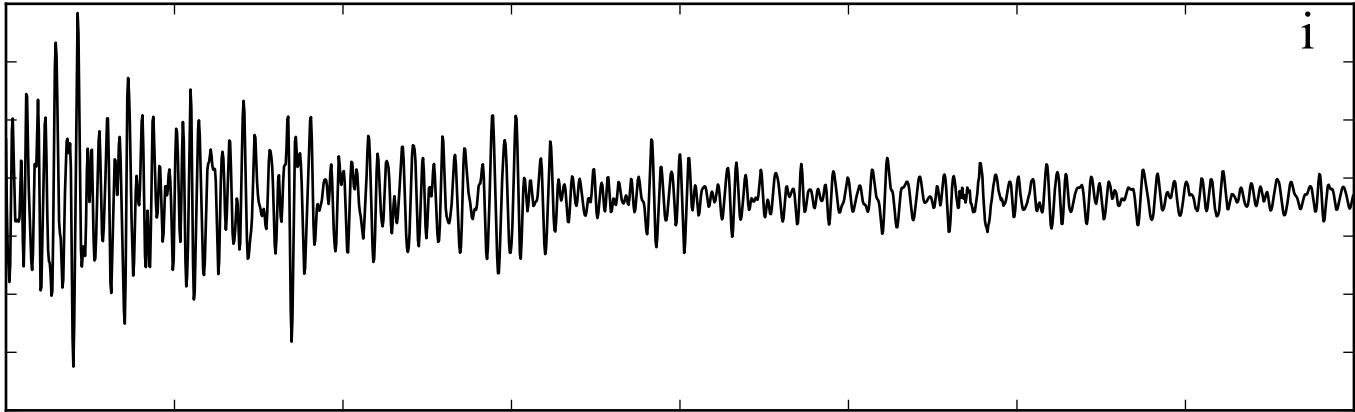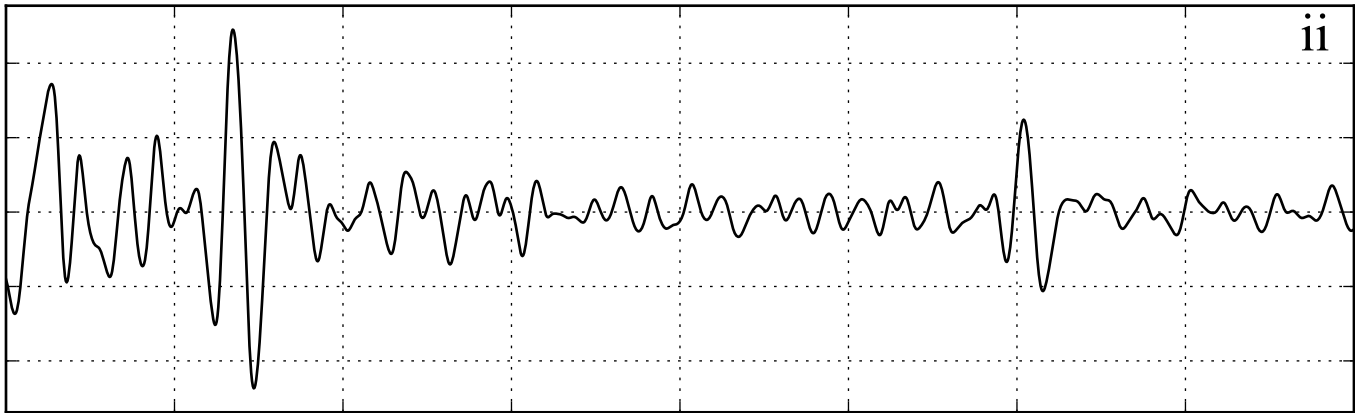

Time [s]

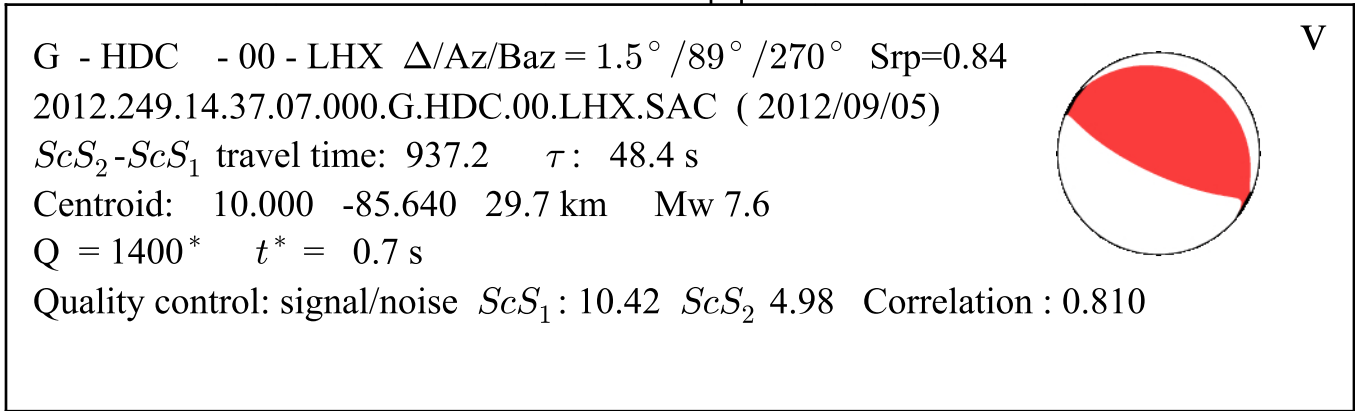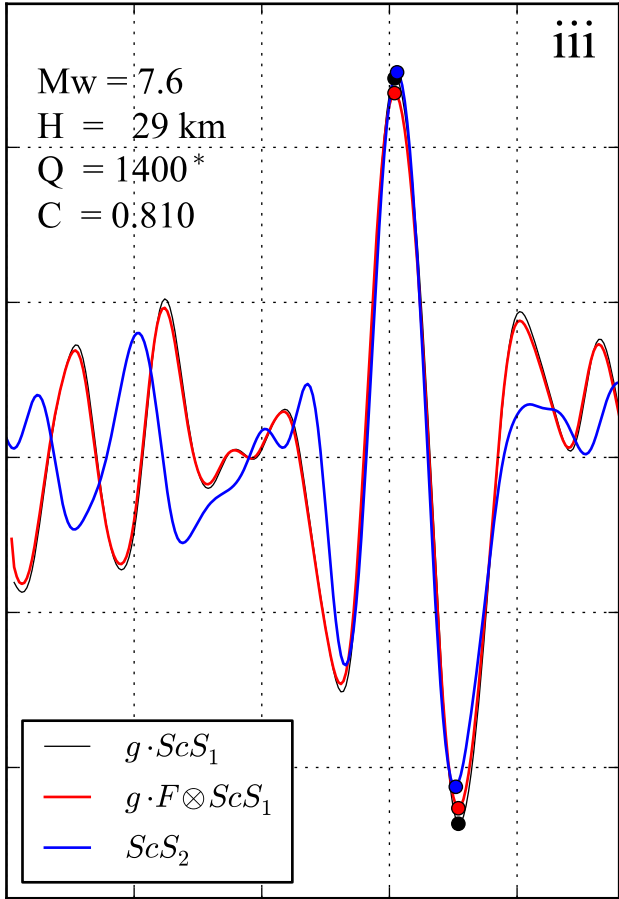

Time [s]

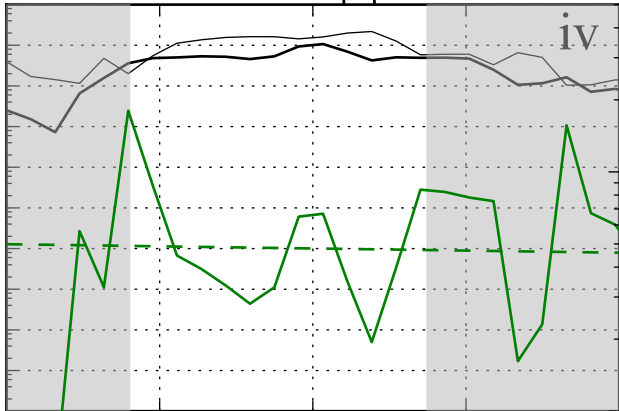

Frequency [hz]



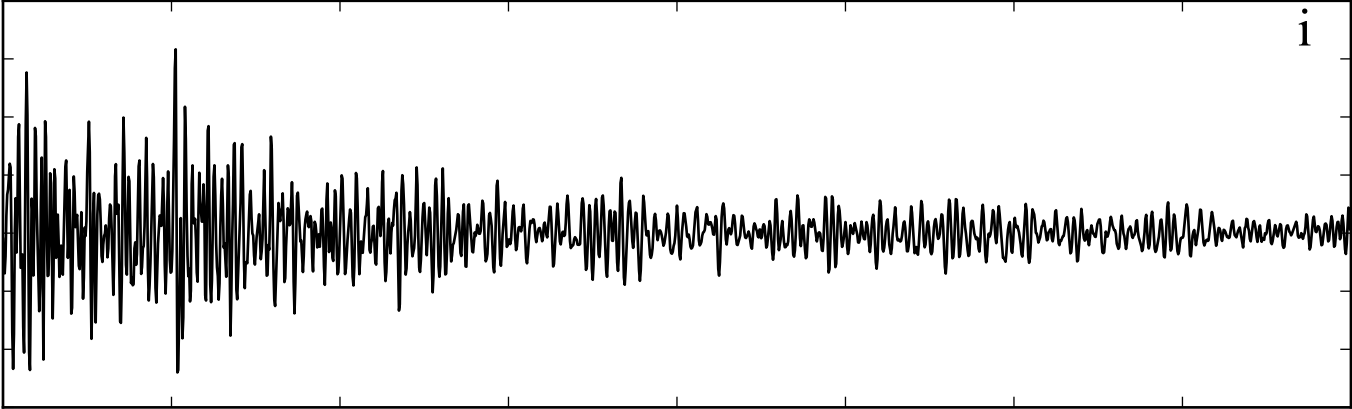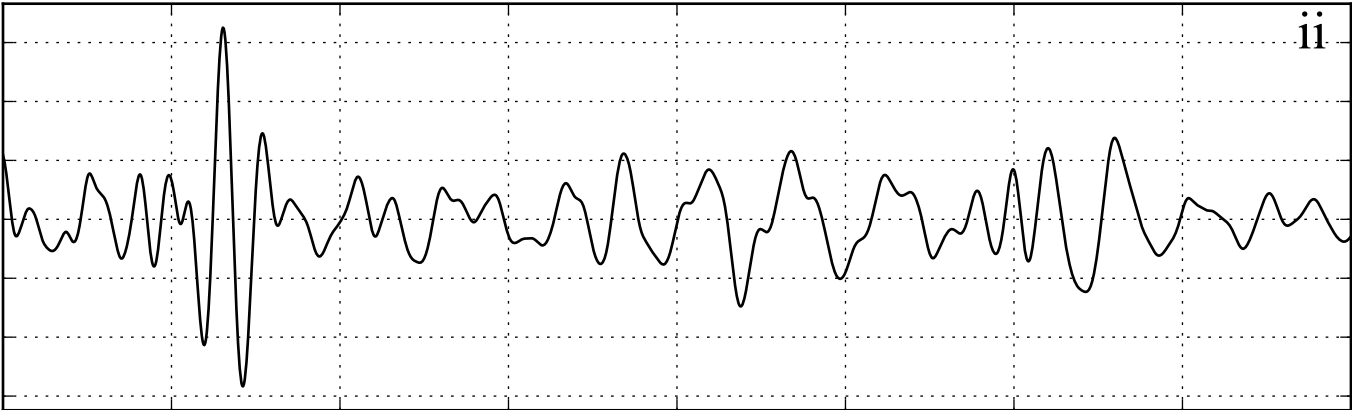

Time [s]

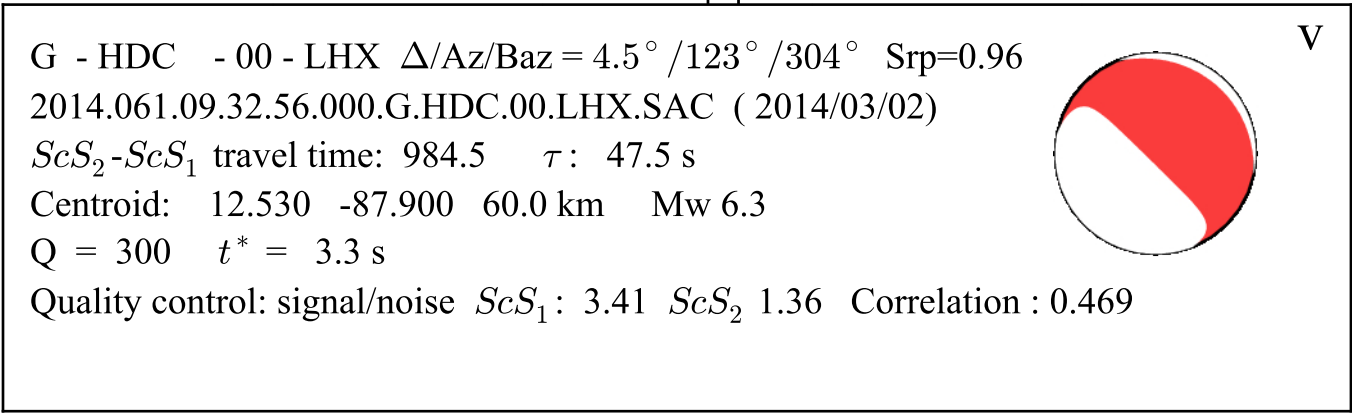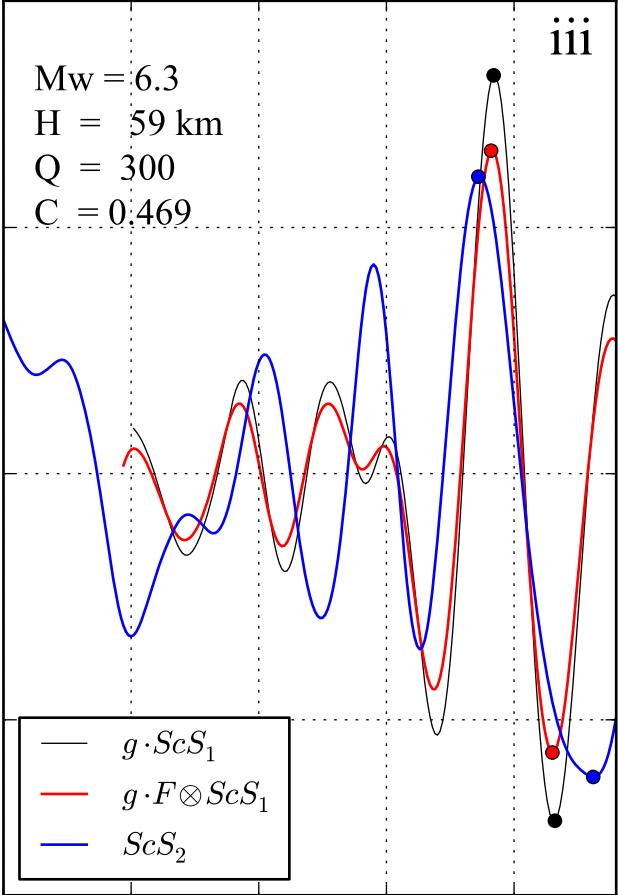

Time [s]

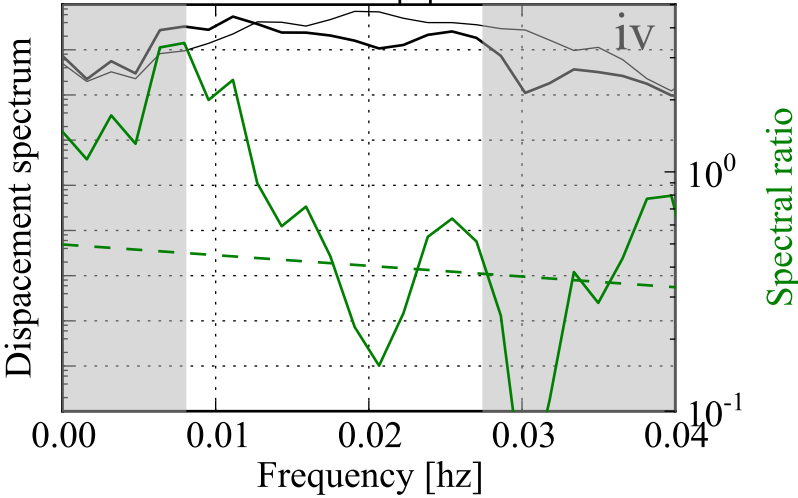

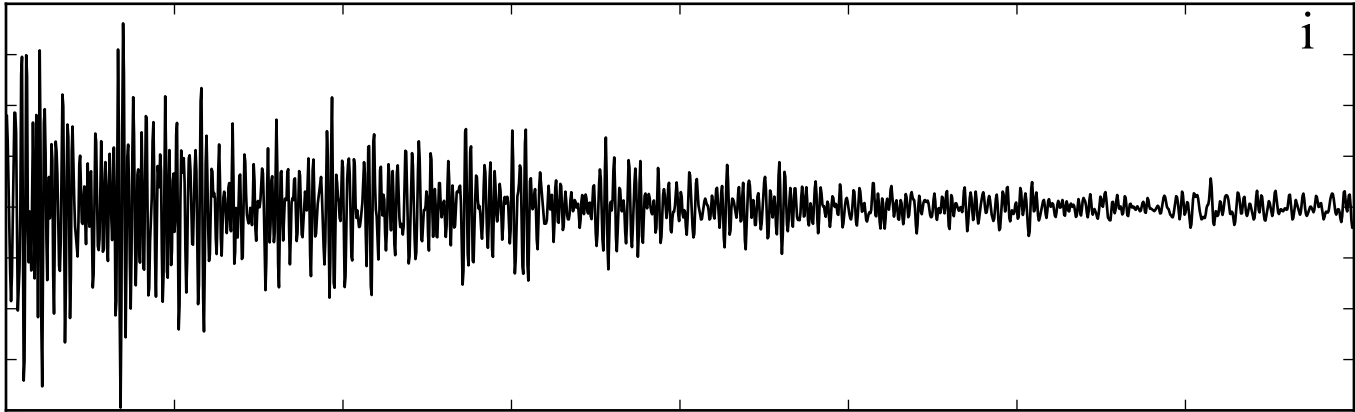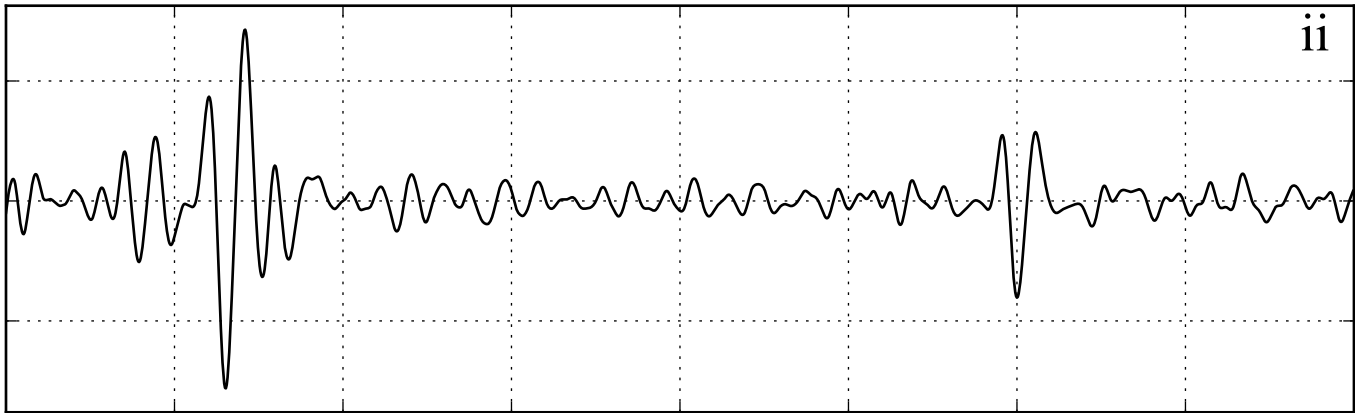

Time [s]

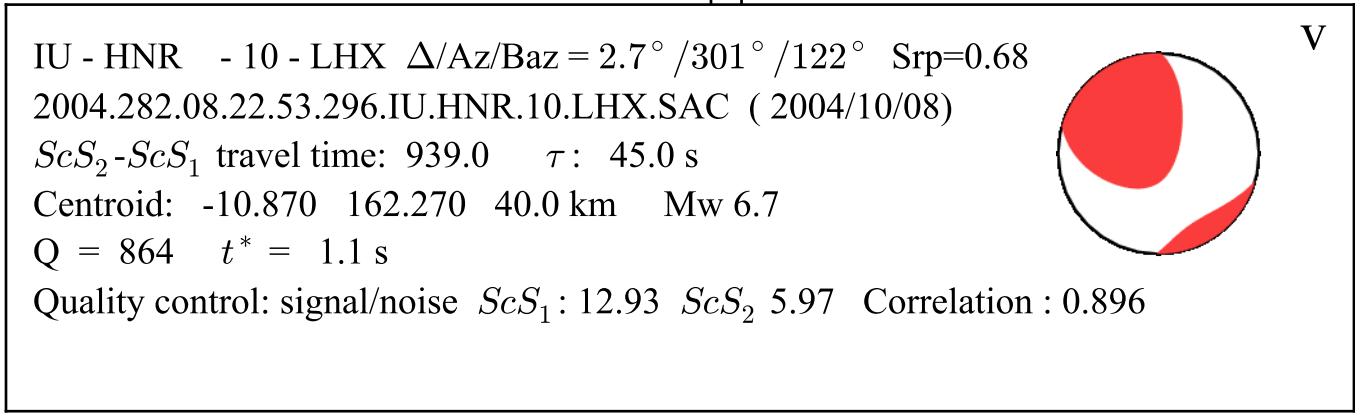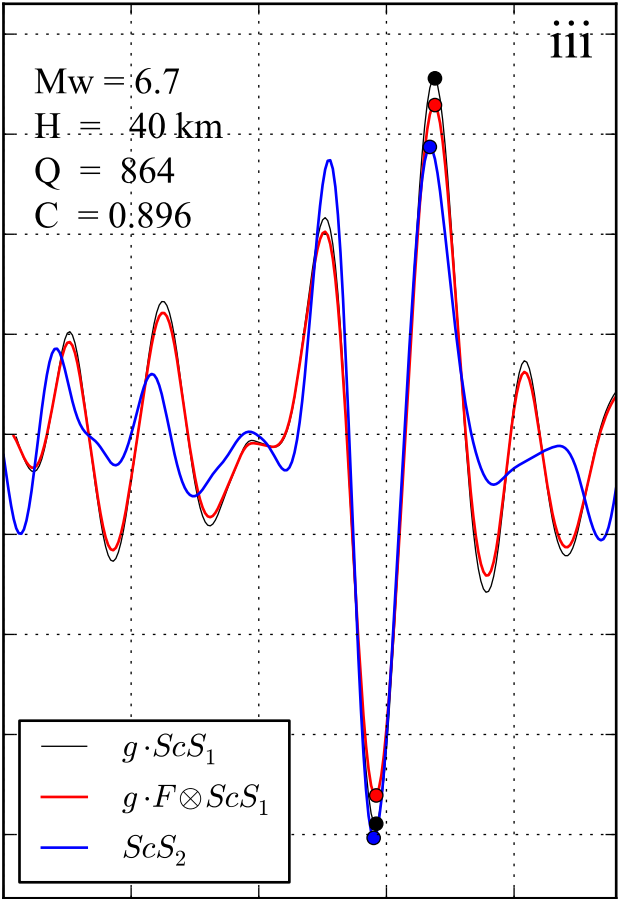

Time [s]

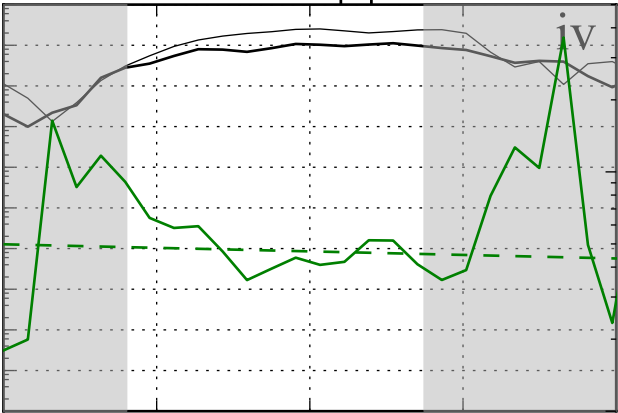

Frequency [hz]

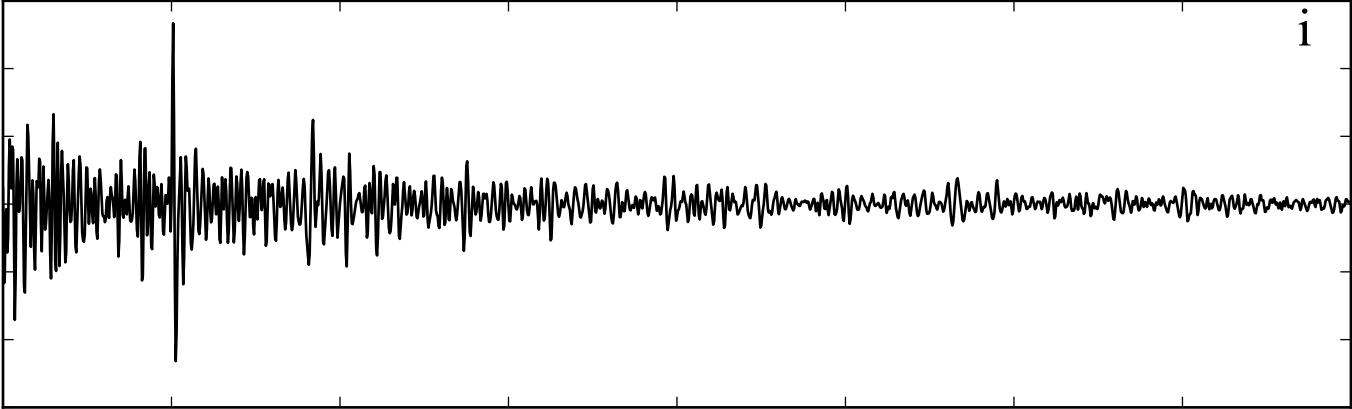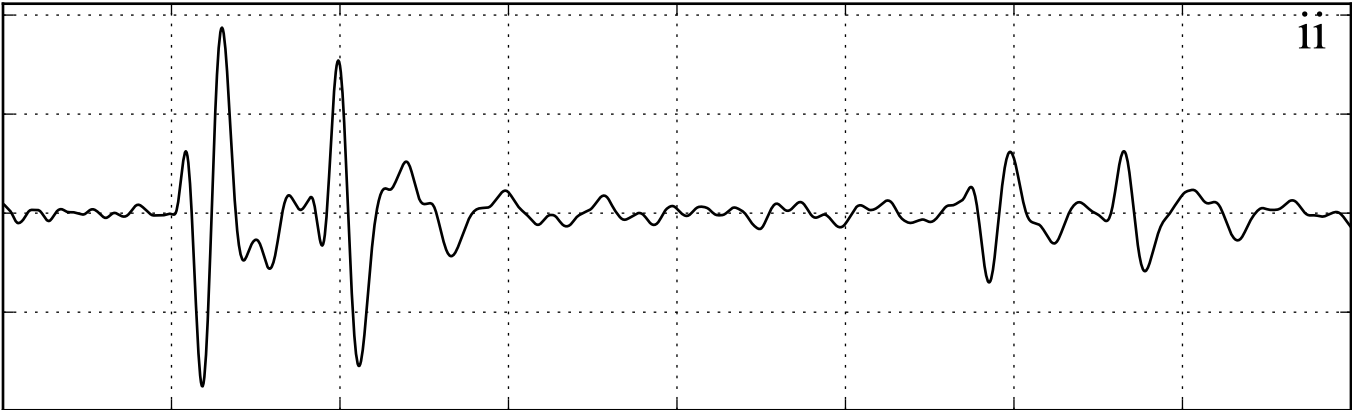

Time [s]

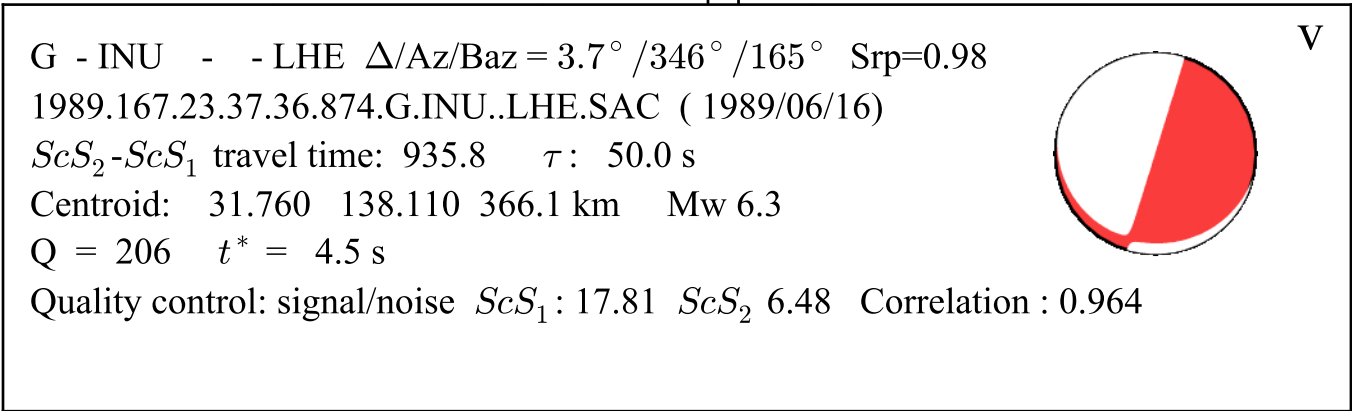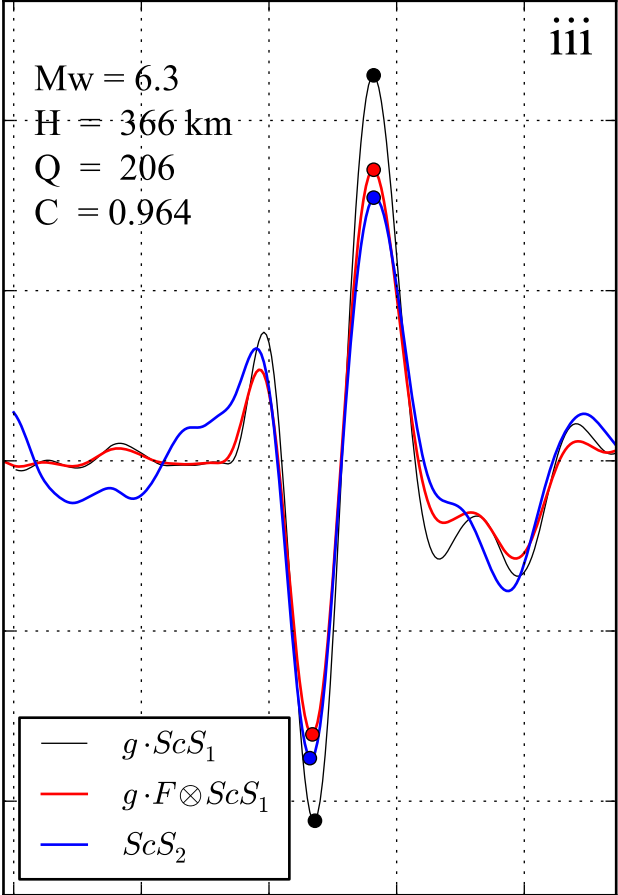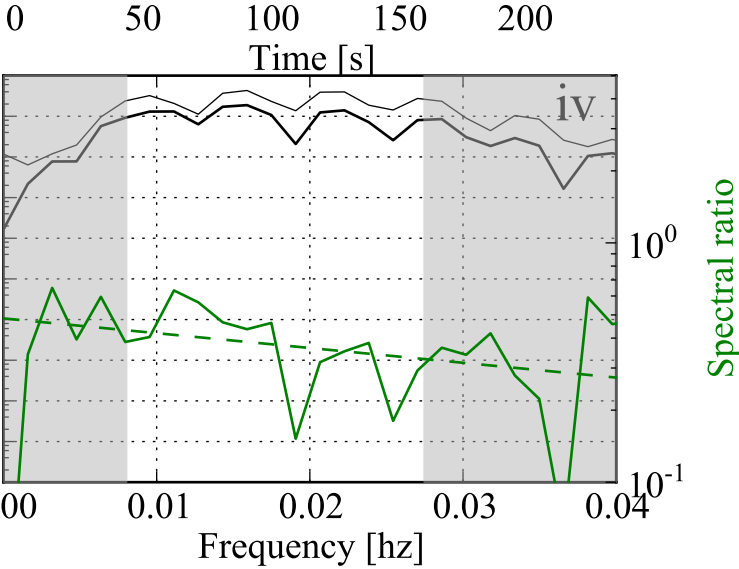

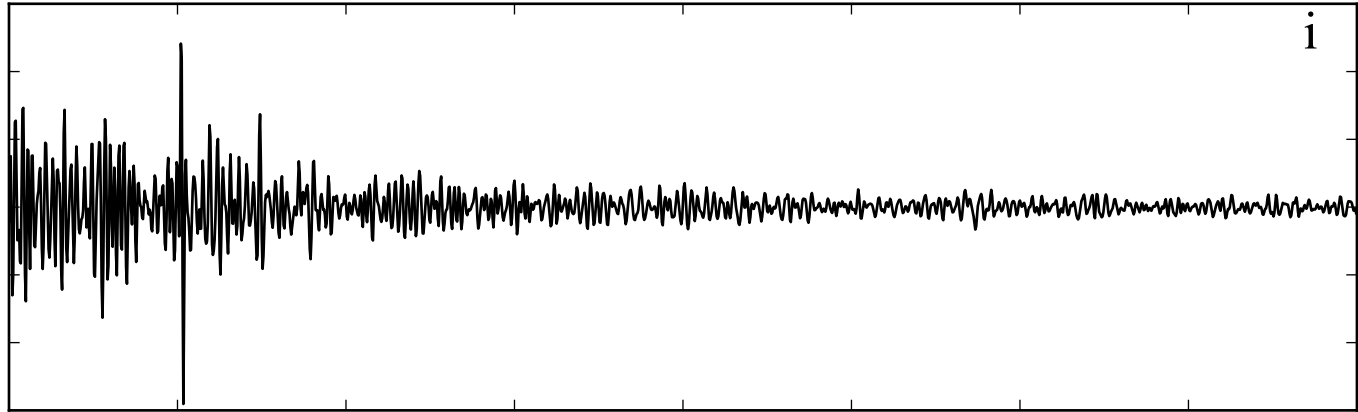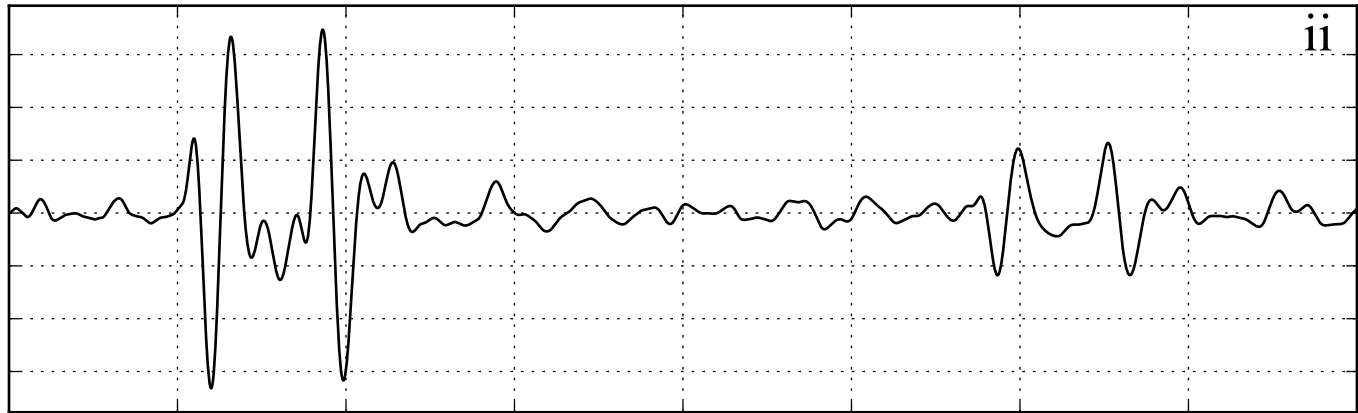

Time [s]

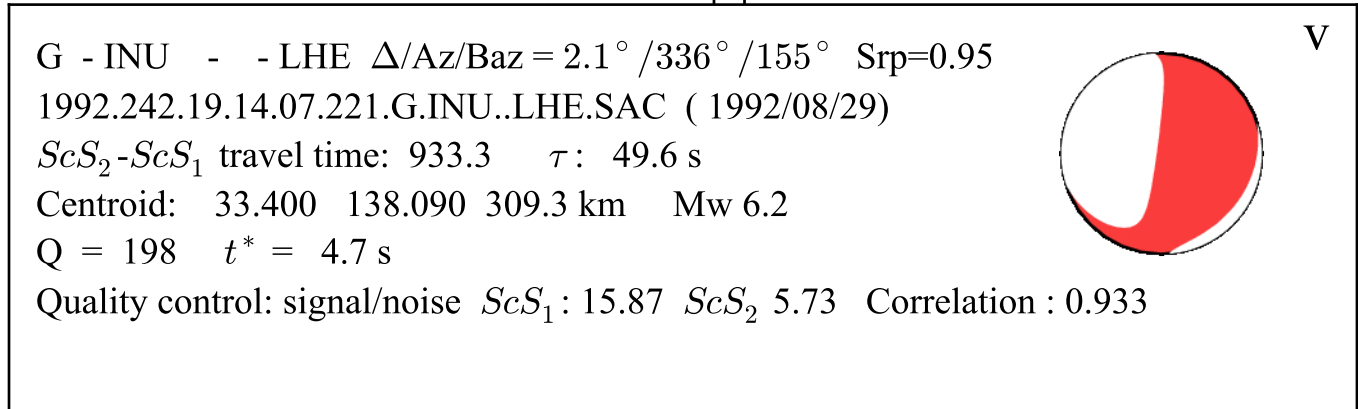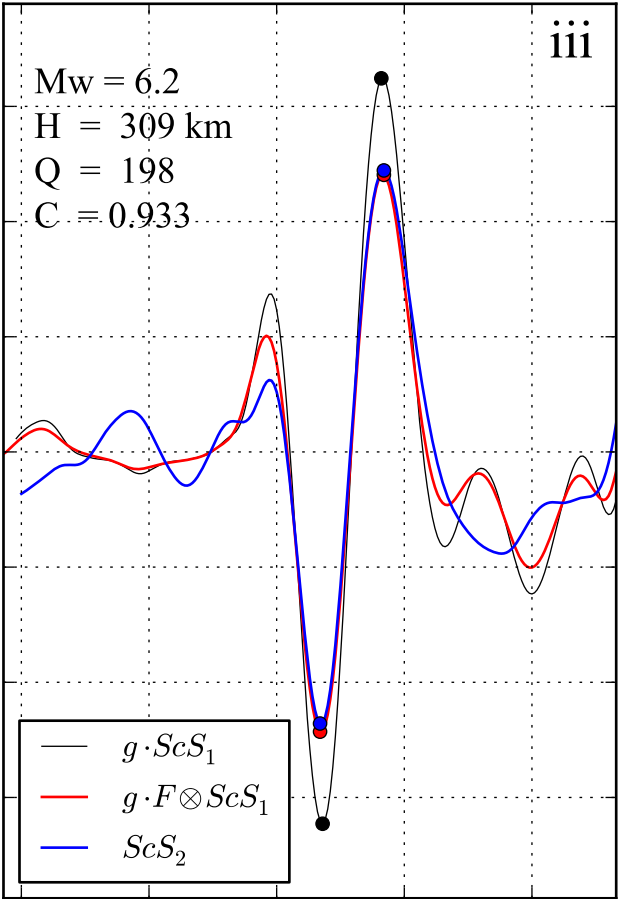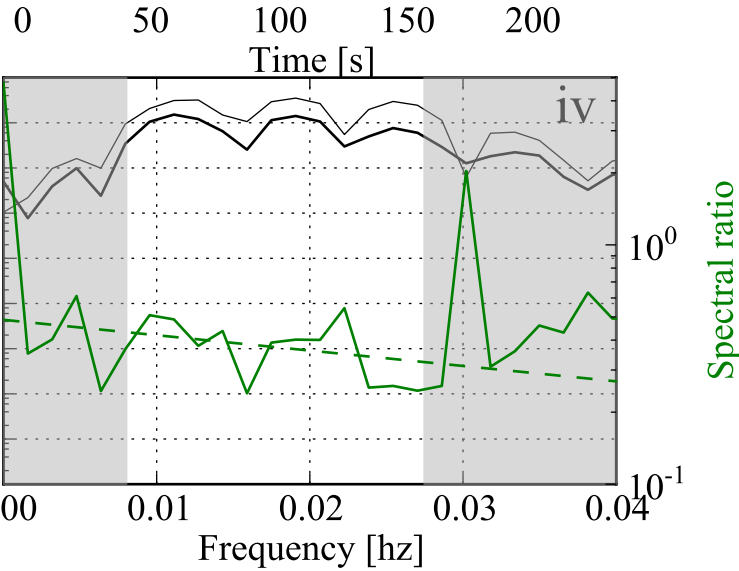

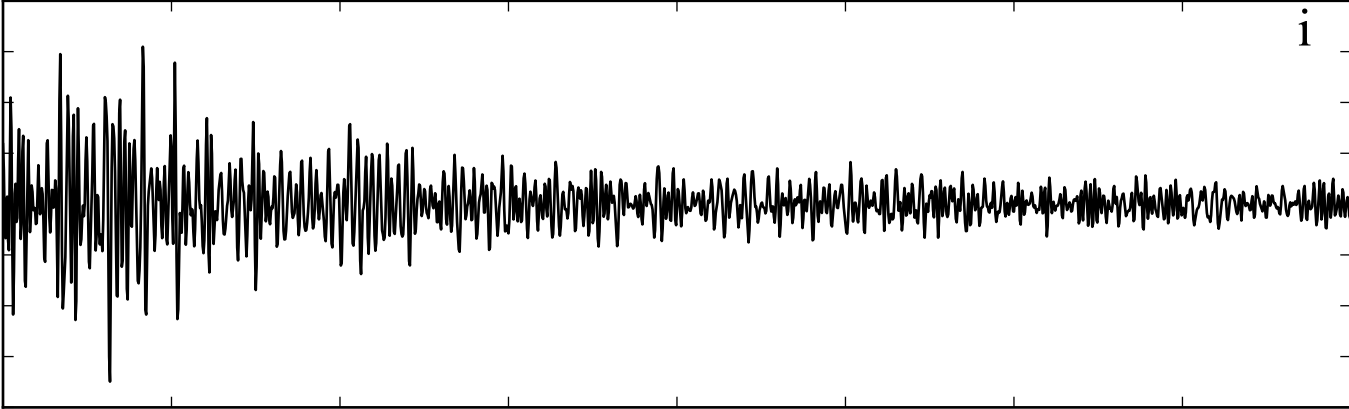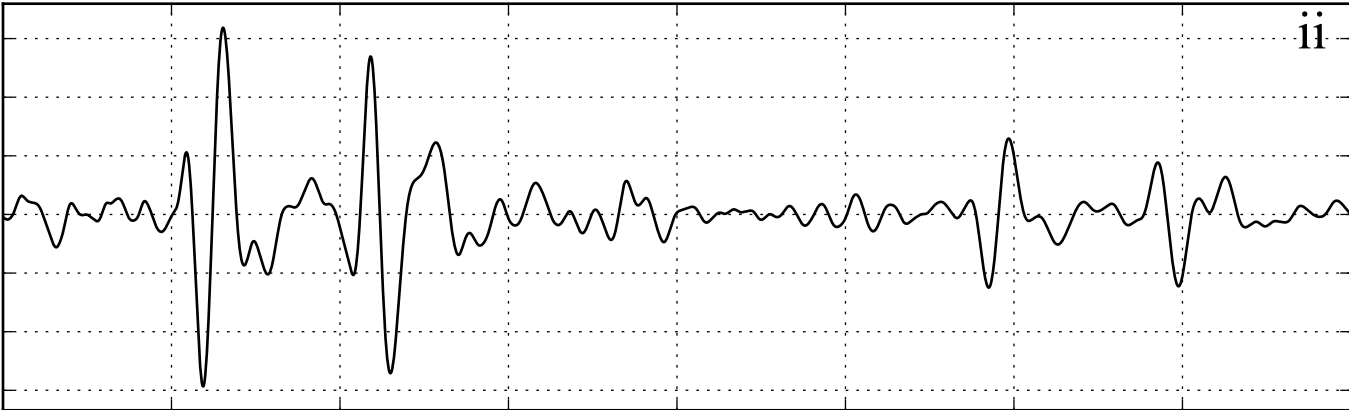

Time [s]

G - INU - - LHE  $\Delta/Az/Baz = 4.1^\circ/142^\circ/324^\circ$   $Srp=0.53$   
1993.019.14.34.26.500.G.INU..LHE.SAC ( 1993/01/19)  
 $ScS_2-ScS_1$  travel time: 932.9  $\tau$ : 50.5 s  
Centroid: 38.700 133.960 461.6 km Mw 6.5  
 $Q = 408$   $t^* = 2.3$  s  
Quality control: signal/noise  $ScS_1$ : 17.43  $ScS_2$  7.25 Correlation : 0.950

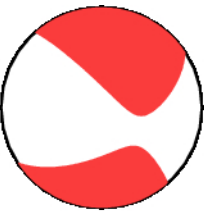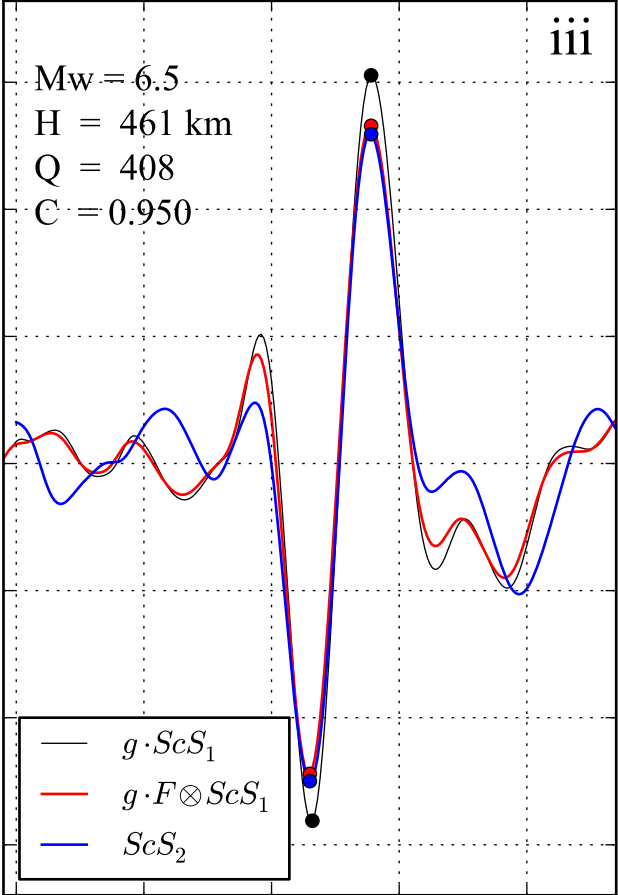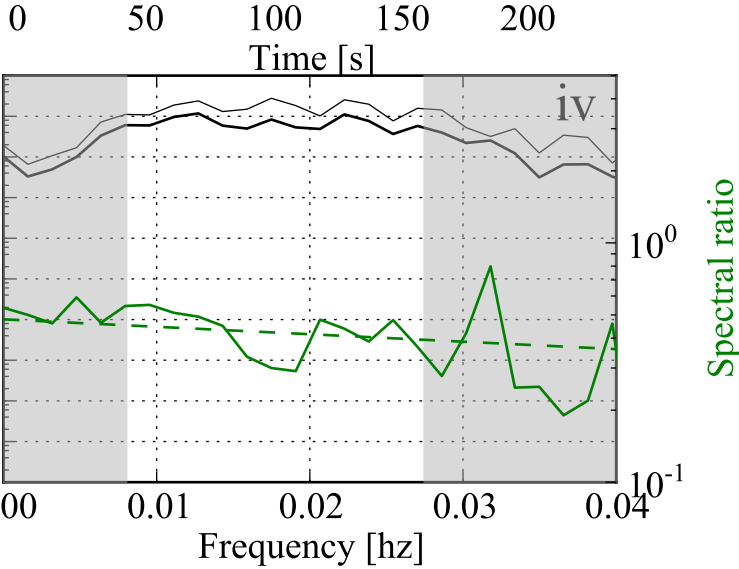

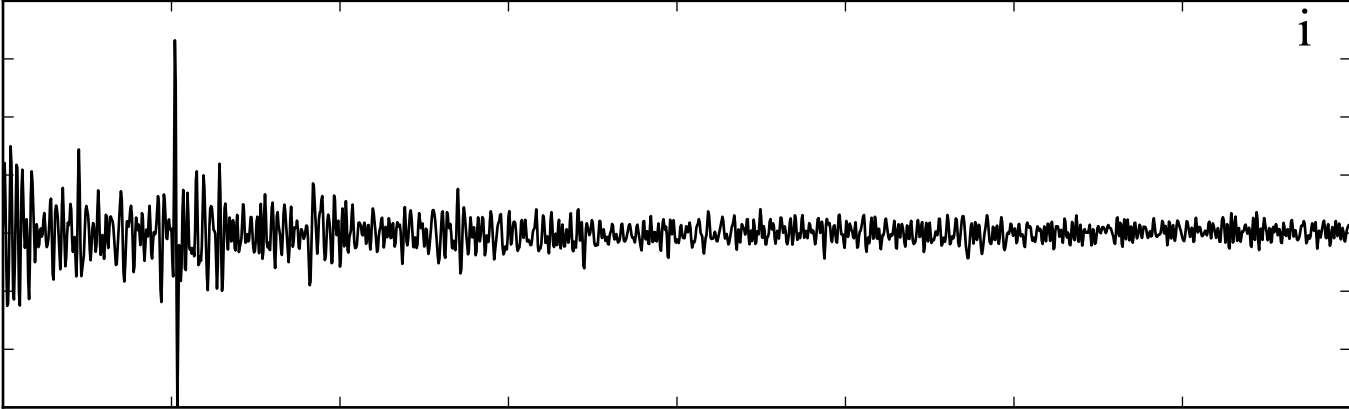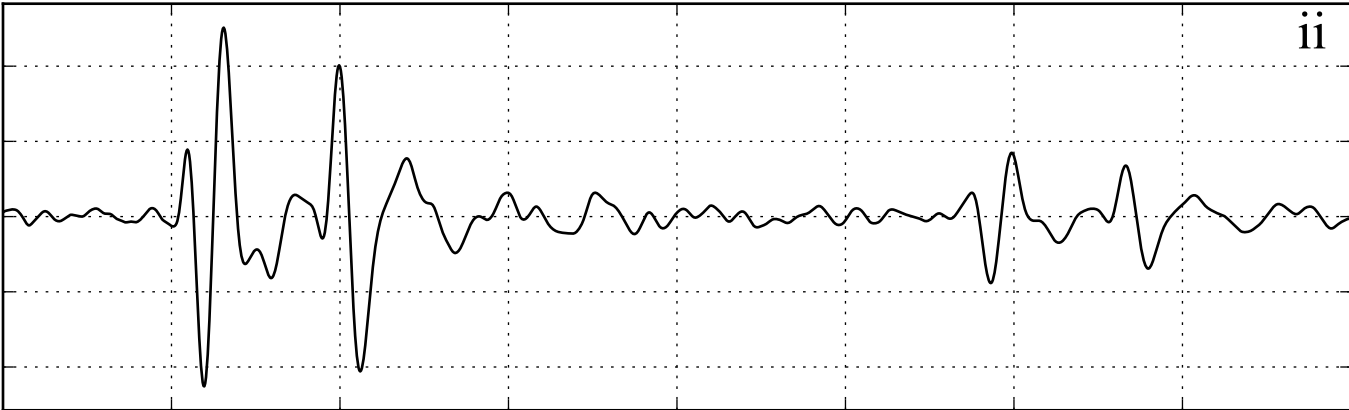

Time [s]

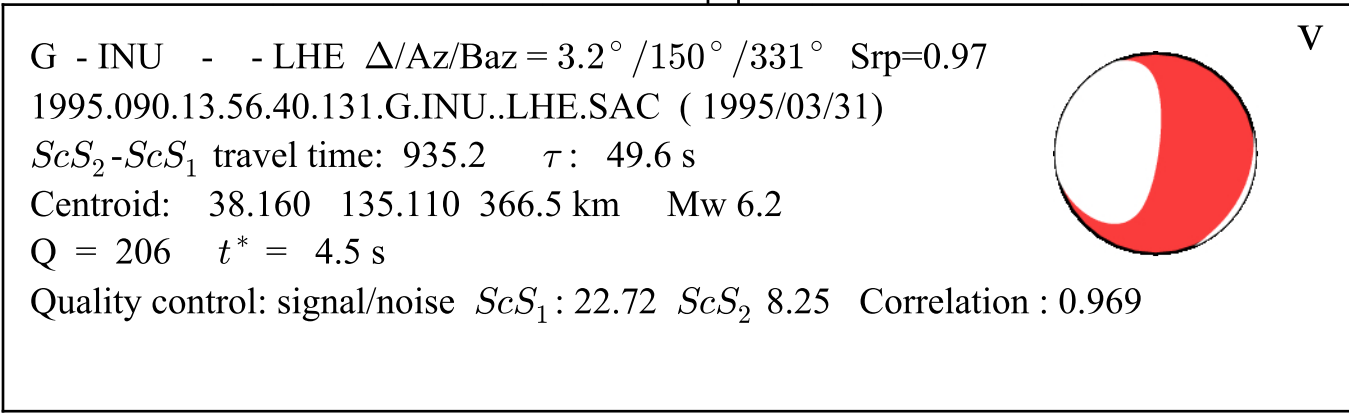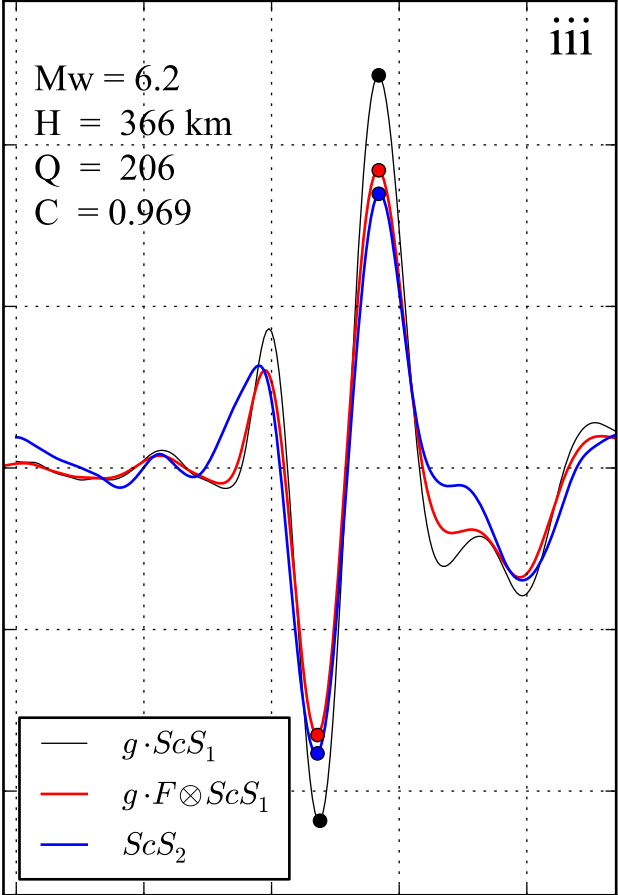

Time [s]

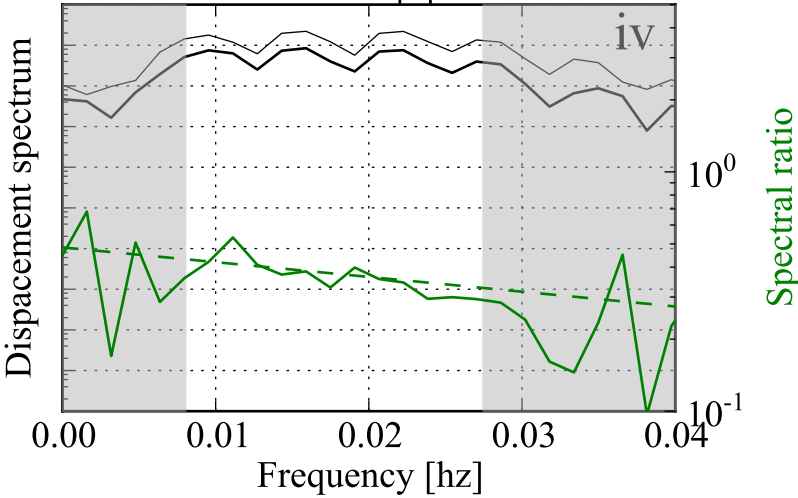

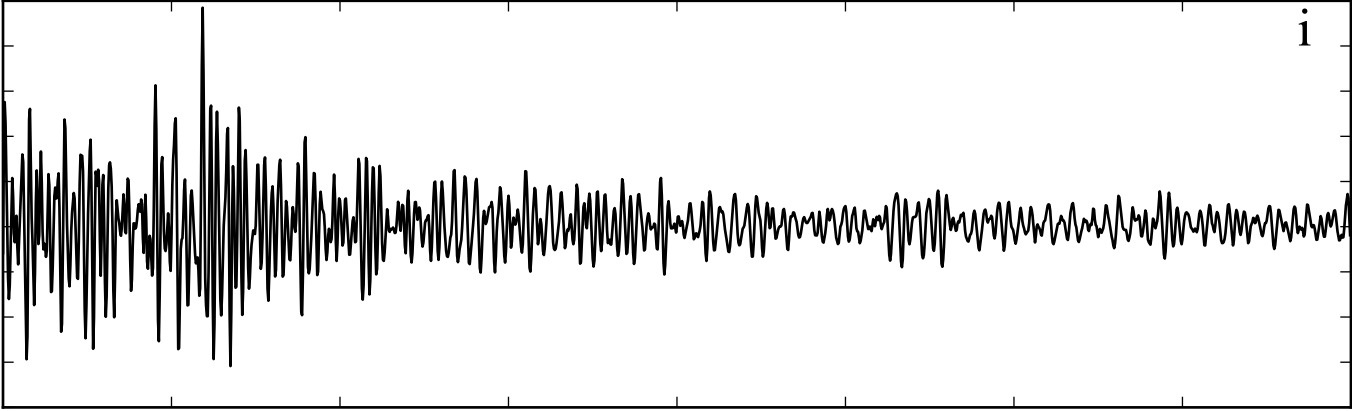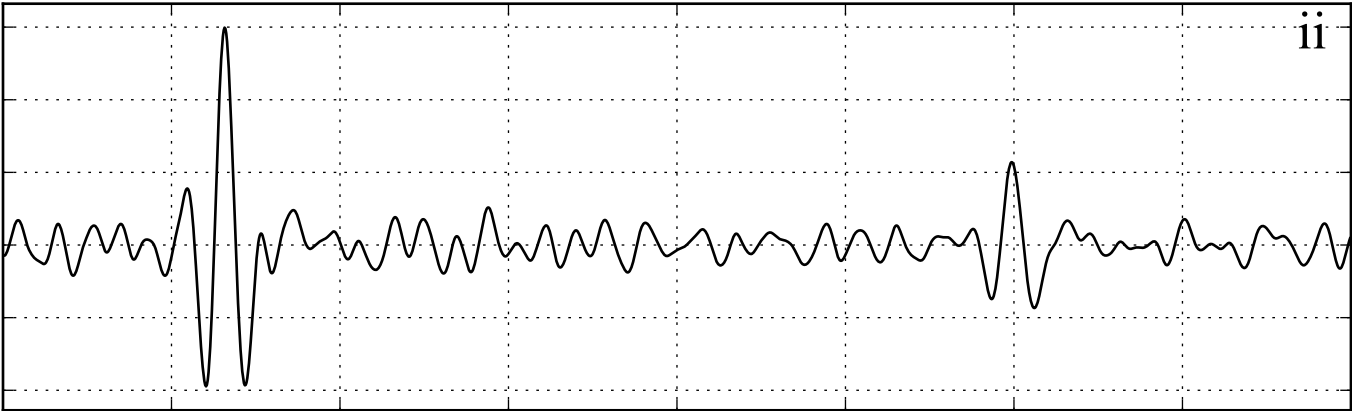

Time [s]

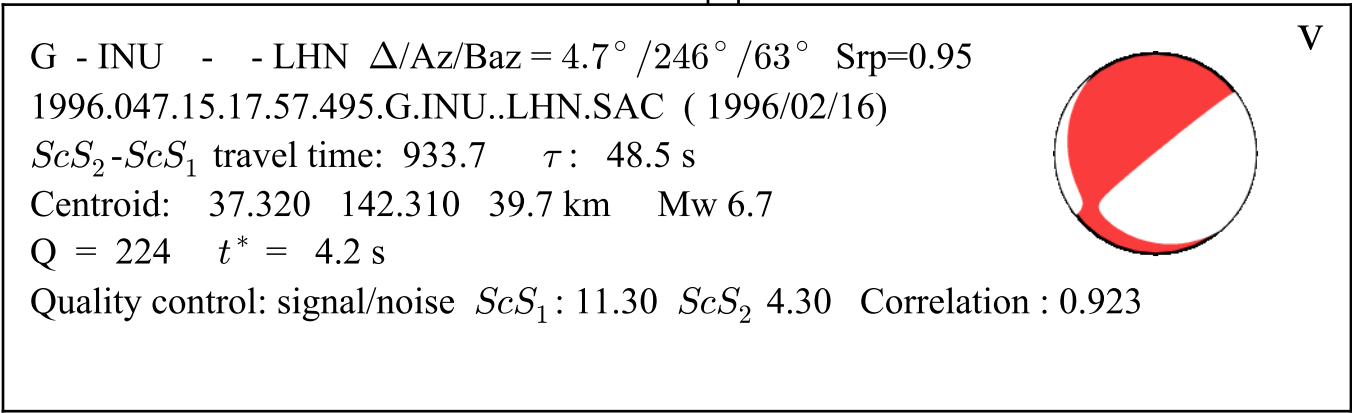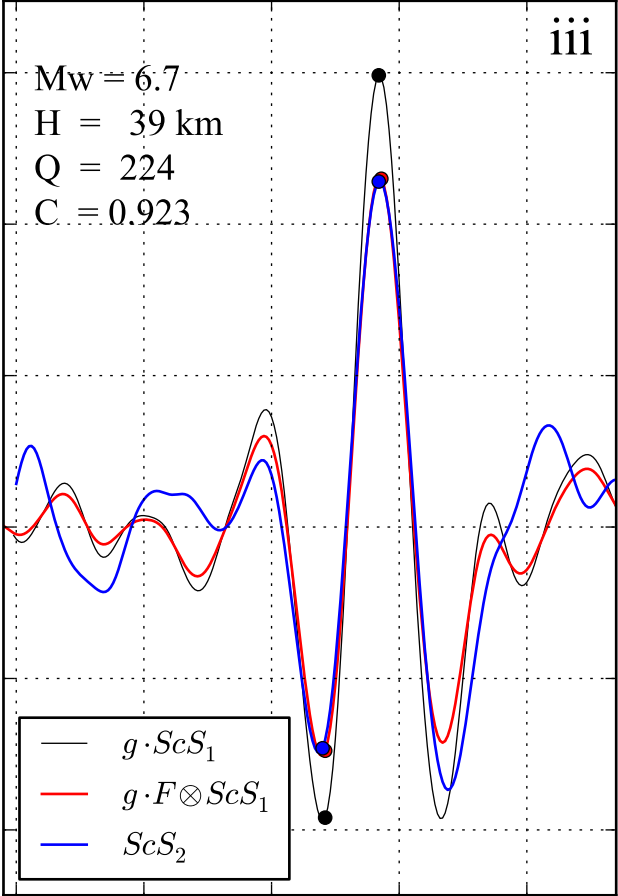

Time [s]

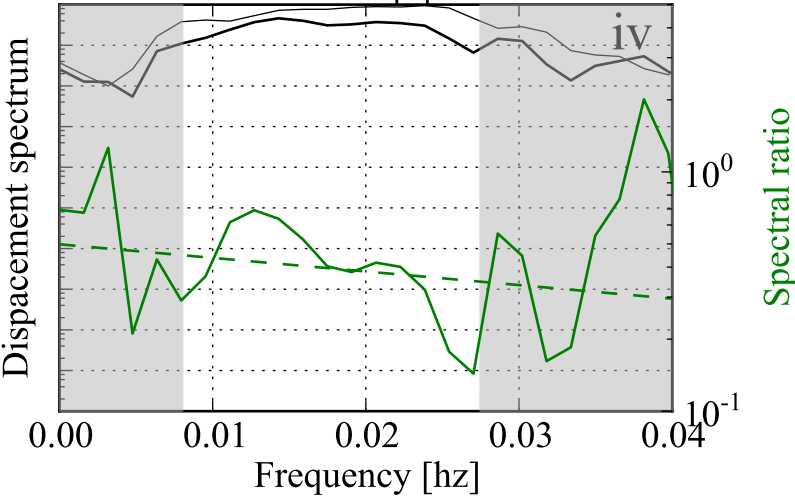

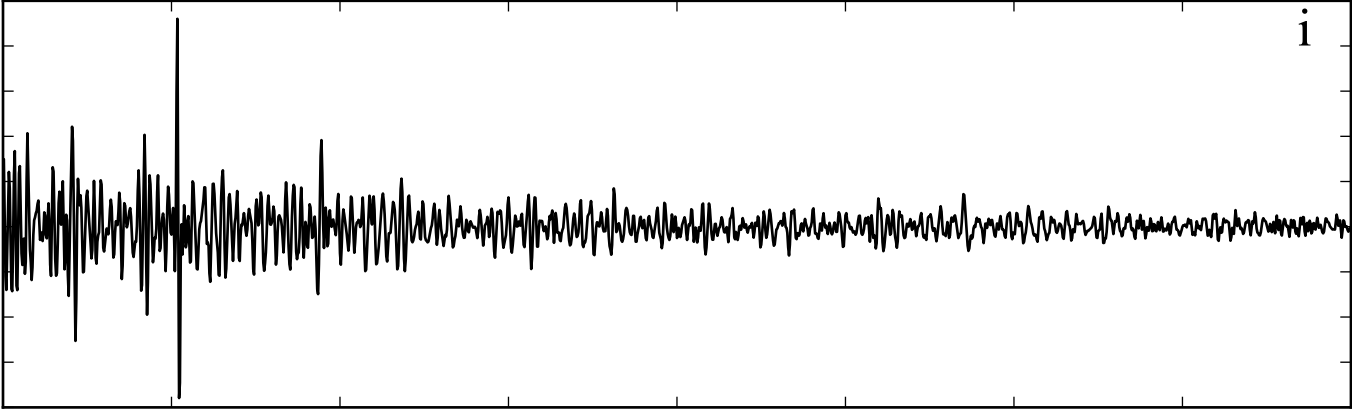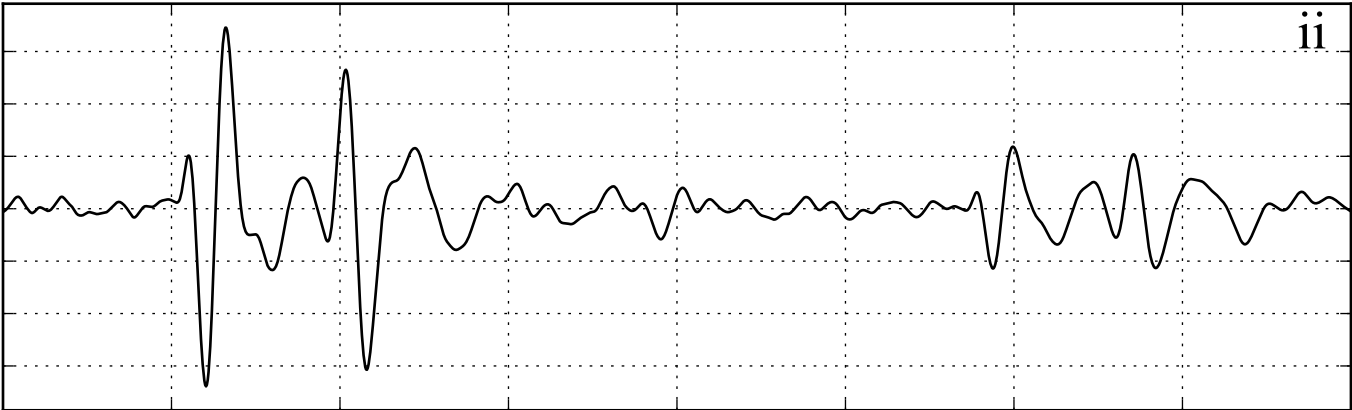

Time [s]

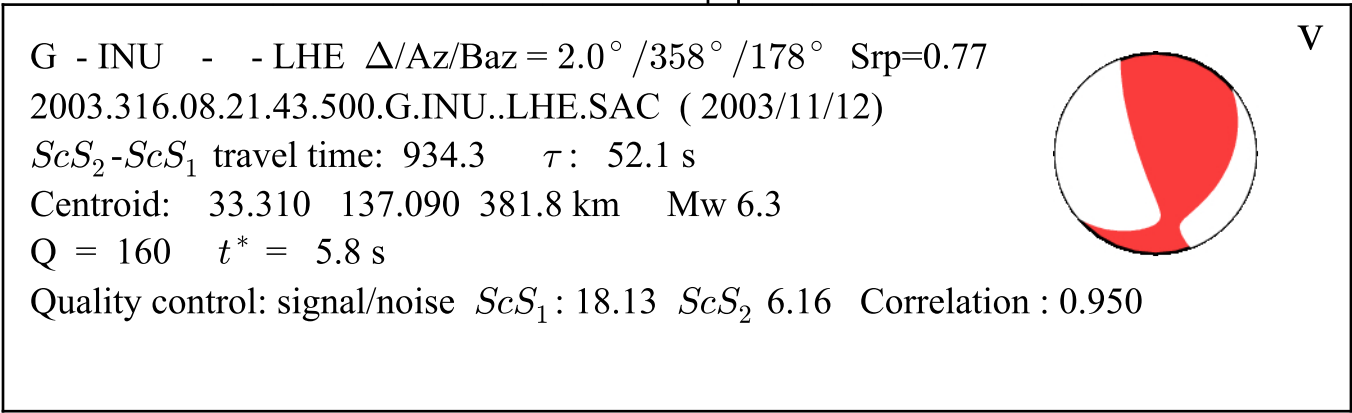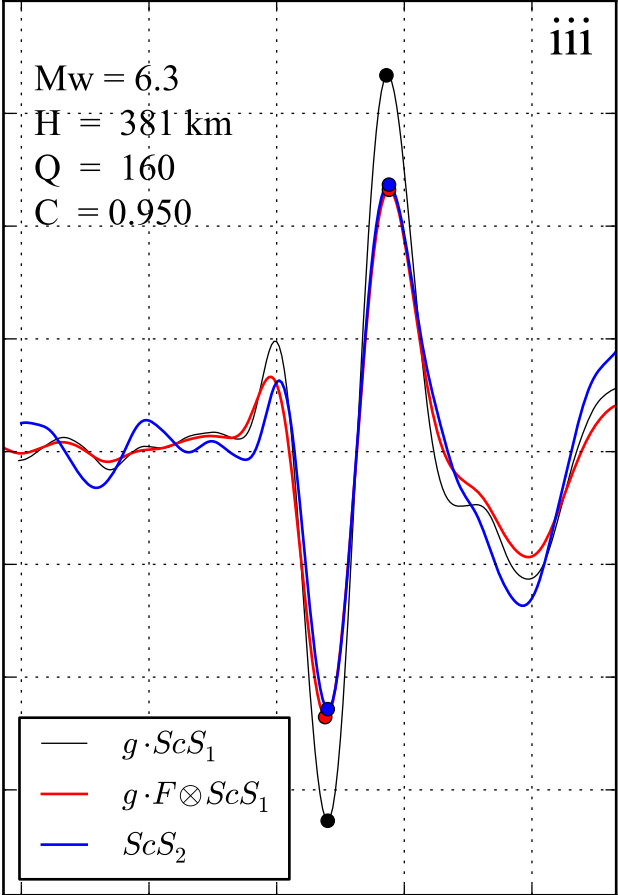

Time [s]

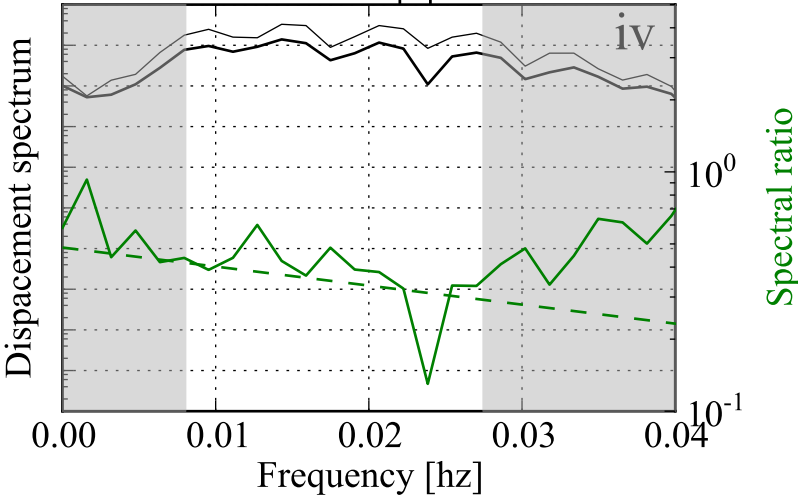



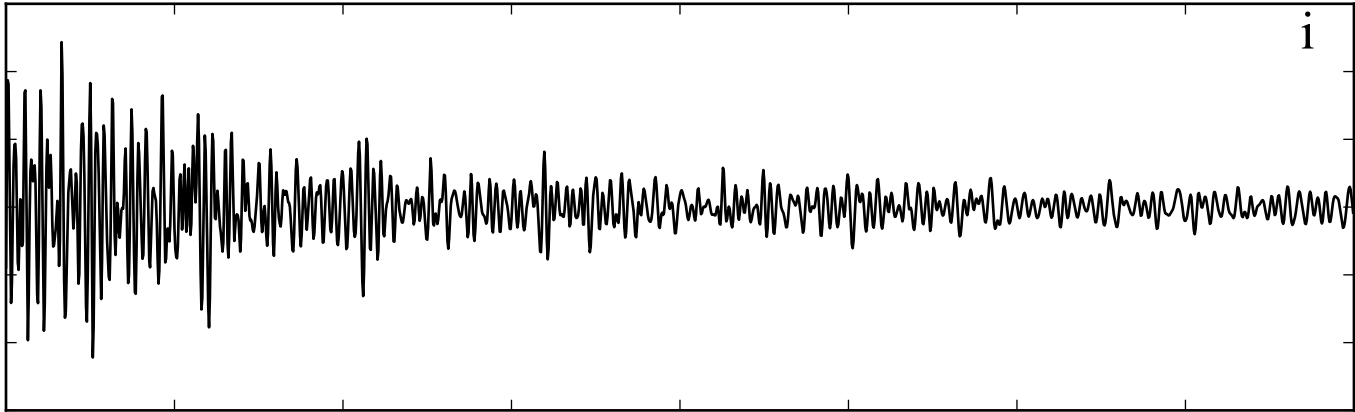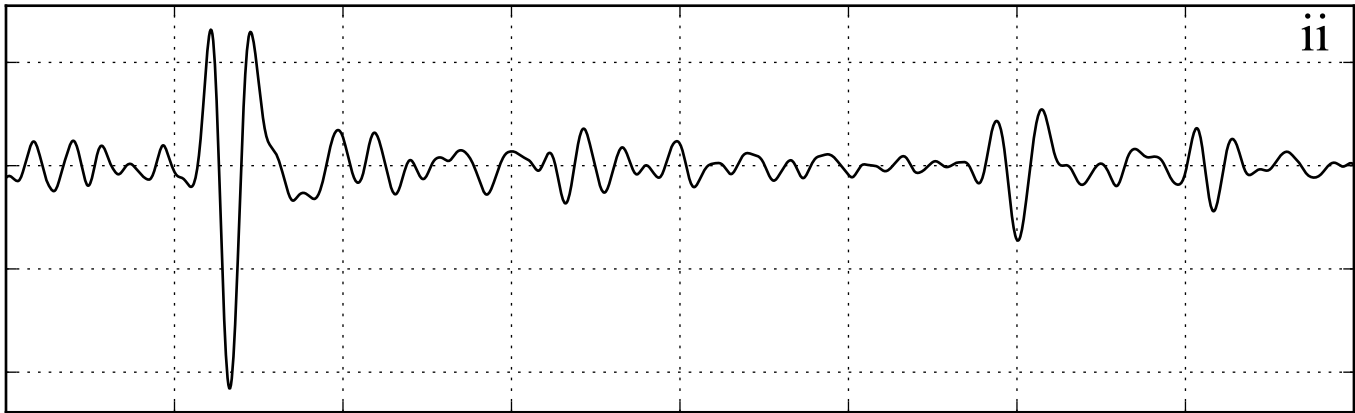

Time [s]

G - INU - - LHE  $\Delta/Az/Baz = 5.0^\circ / 235^\circ / 52^\circ$   $Srp=0.85$   
2005.228.02.41.28.603.G.INU..LHE.SAC ( 2005/08/16)  
 $ScS_2-ScS_1$  travel time: 936.6  $\tau$ : 50.6 s  
Centroid: 38.240 142.050 37.0 km Mw 7.2  
 $Q = 137$   $t^* = 6.8$  s  
Quality control: signal/noise  $ScS_1$ : 15.54  $ScS_2$  5.18 Correlation : 0.971

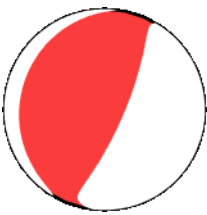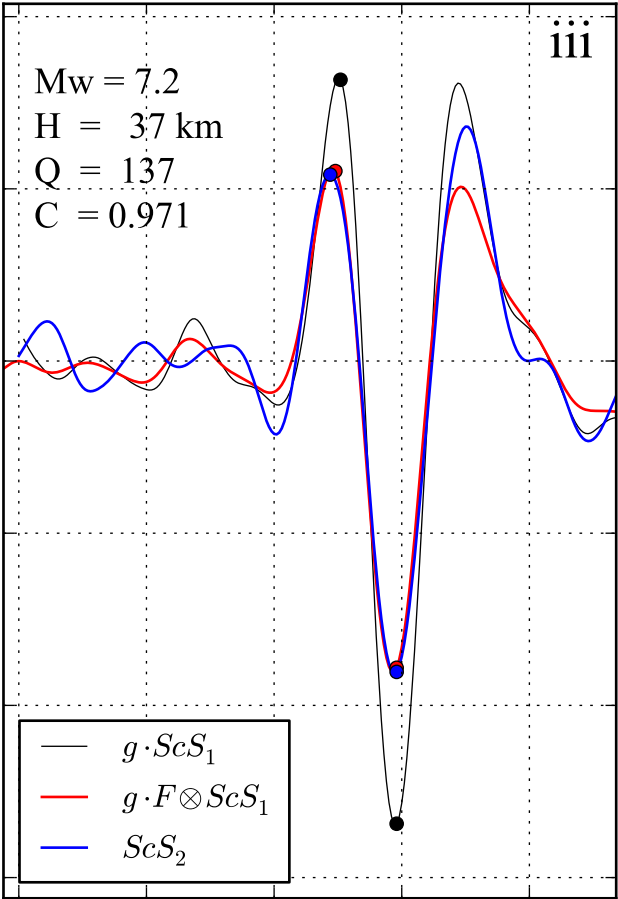

Time [s]

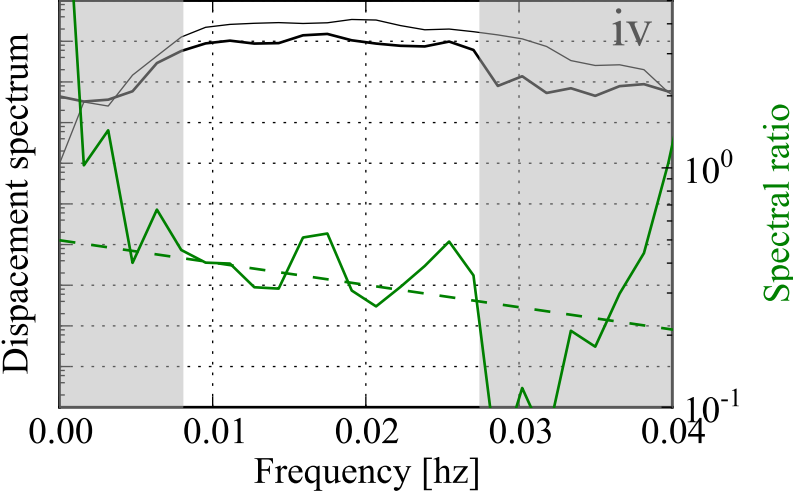

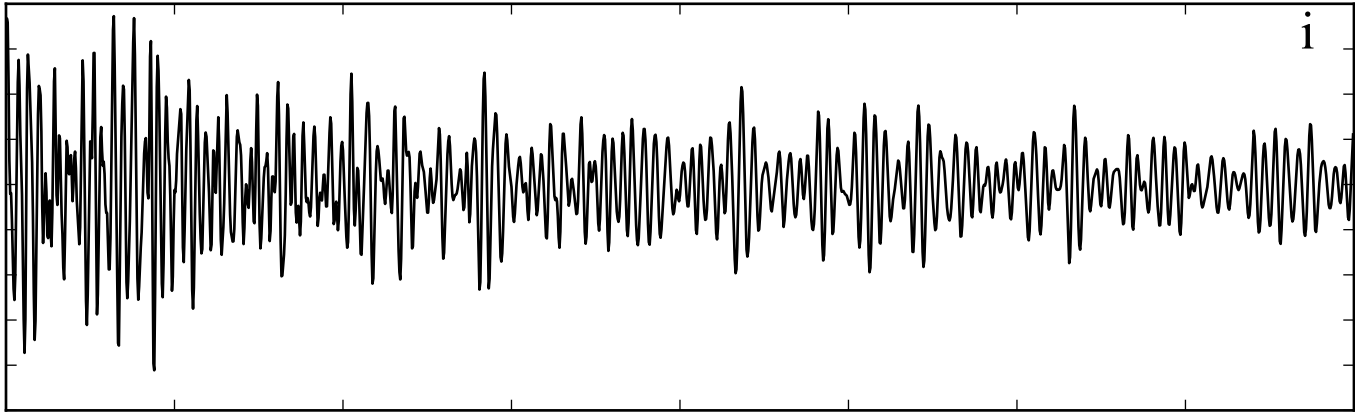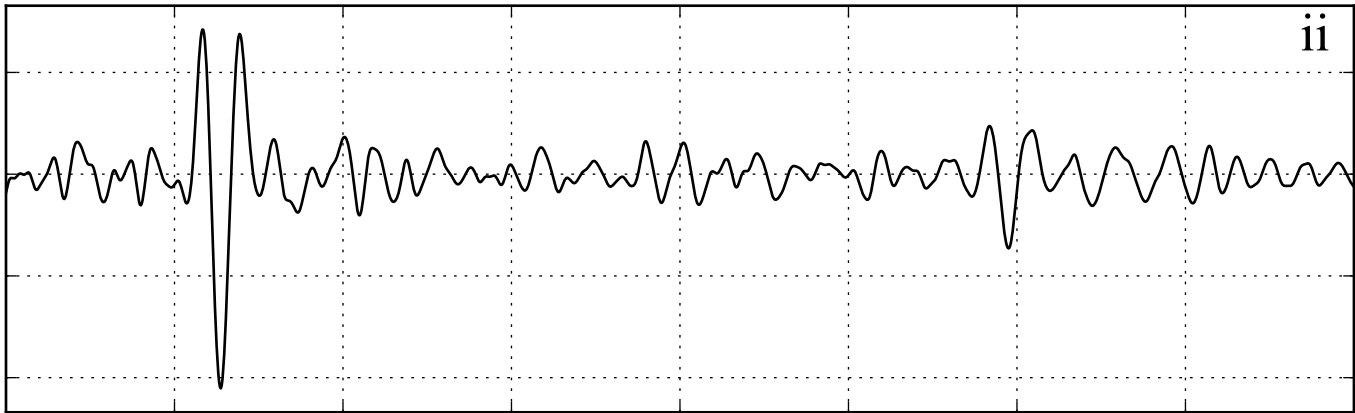

Time [s]

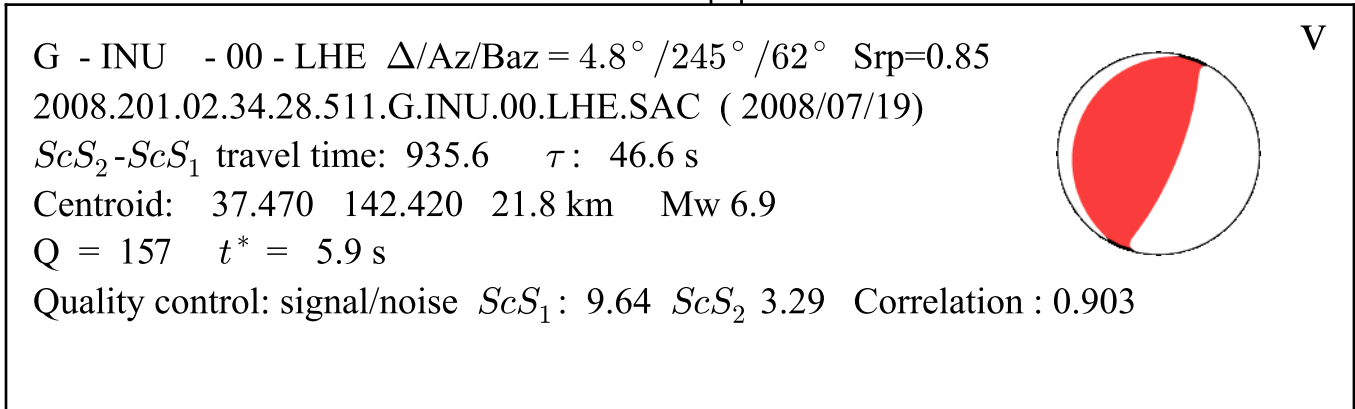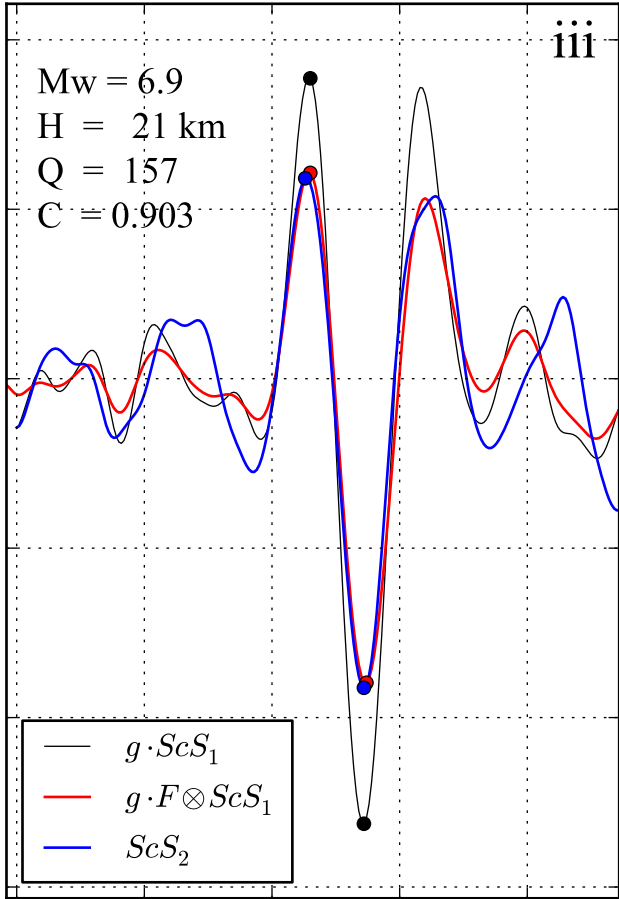

Time [s]

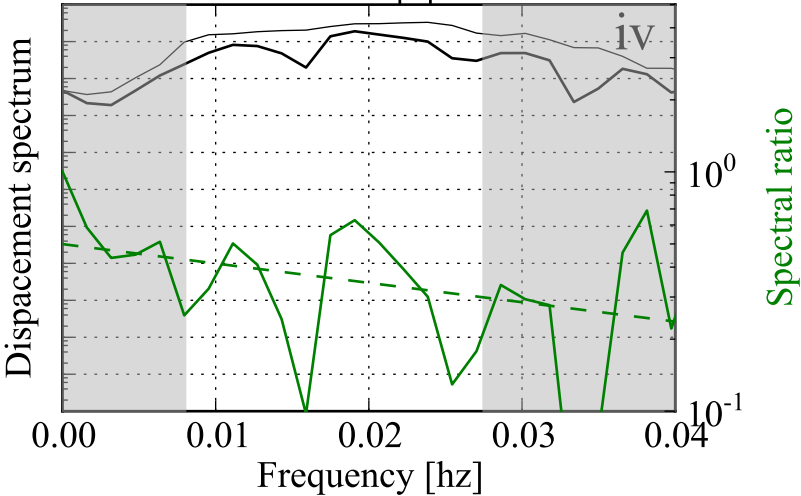

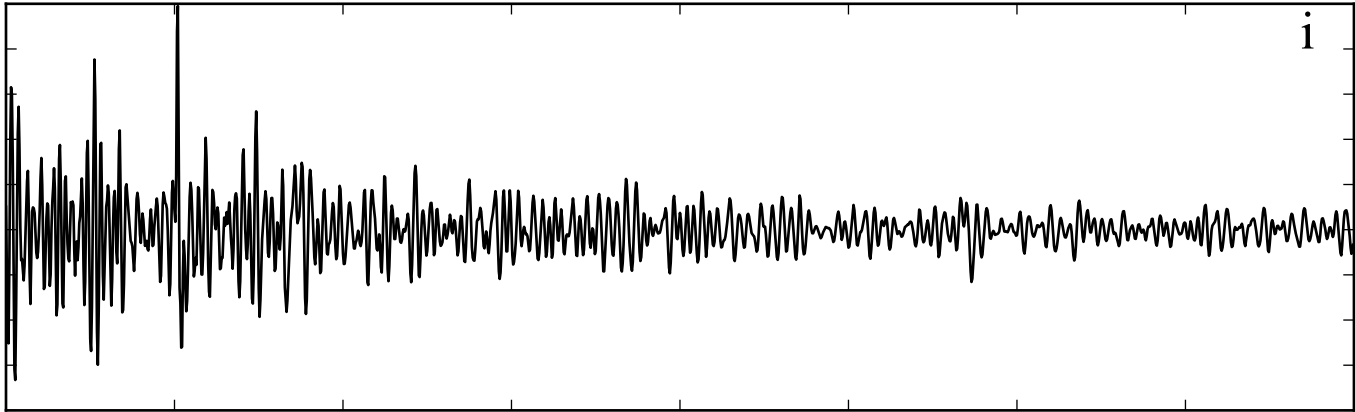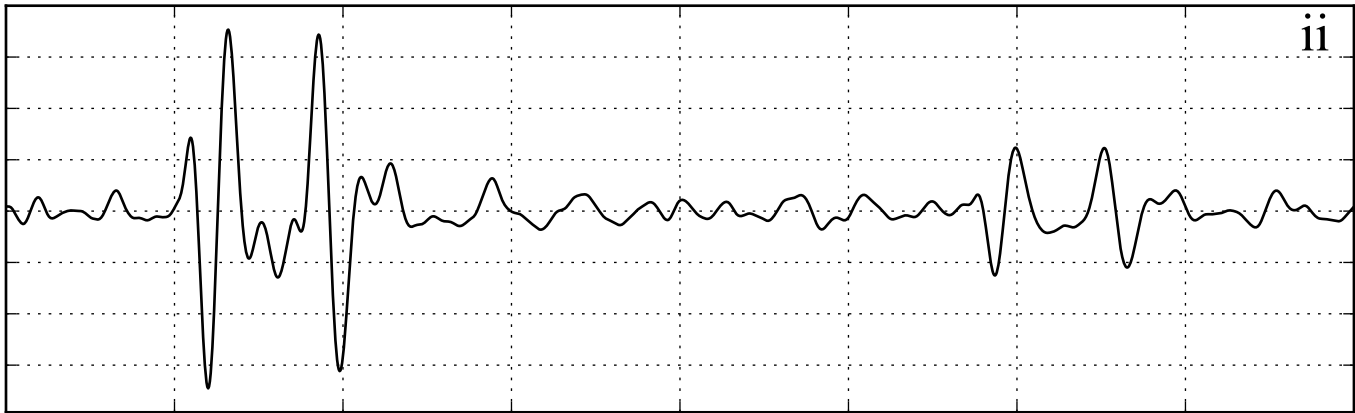

Time [s]

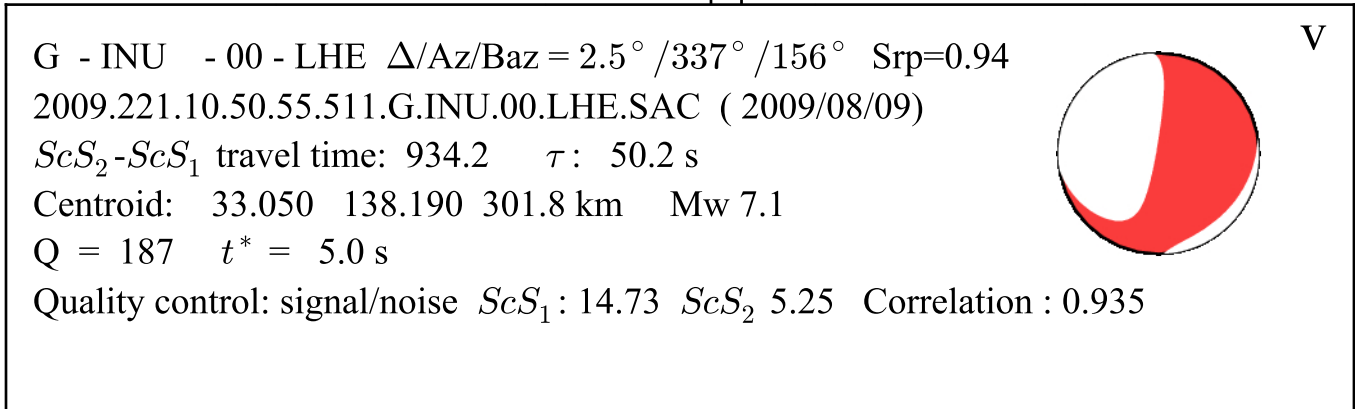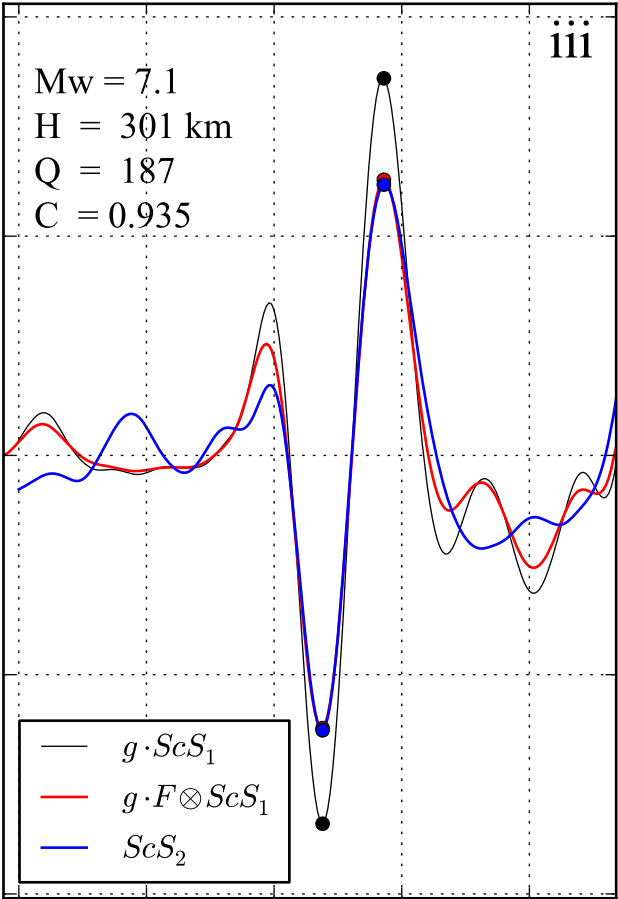

Time [s]

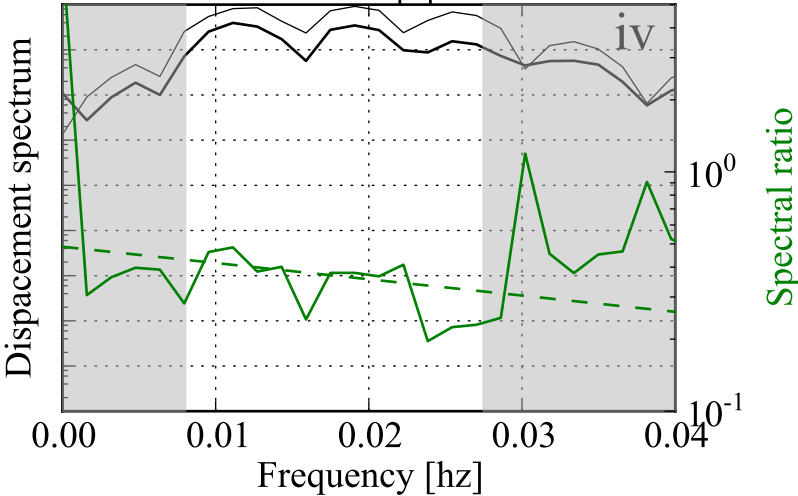

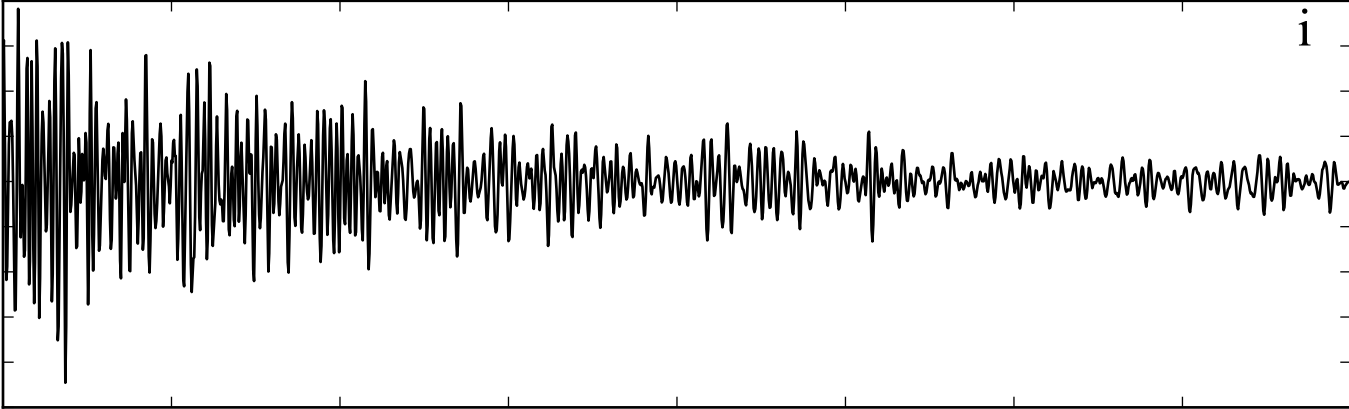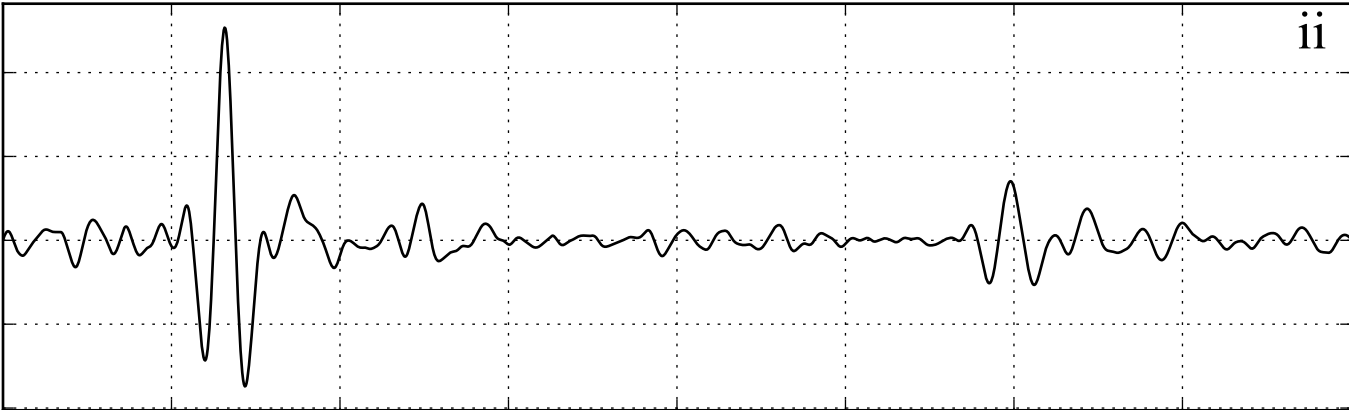

Time [s]

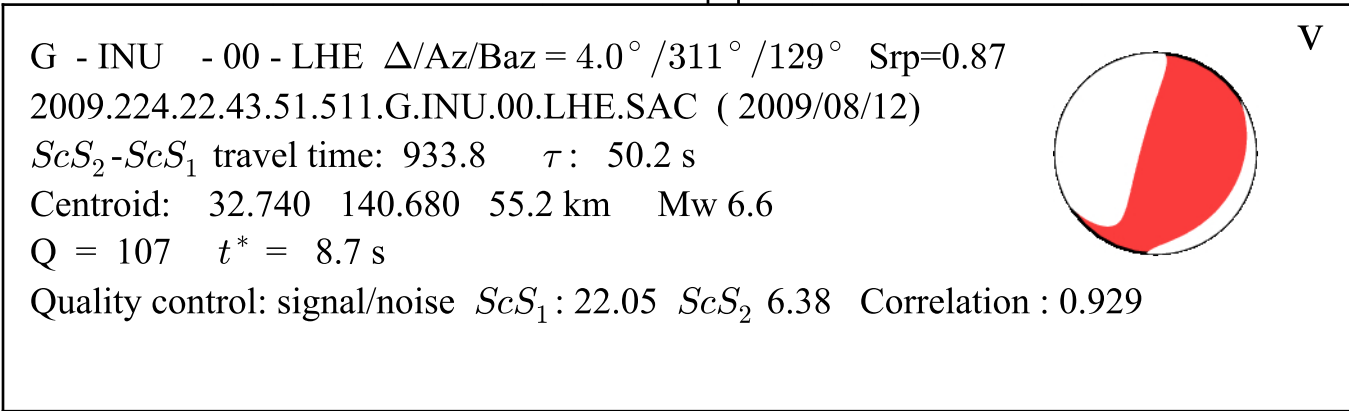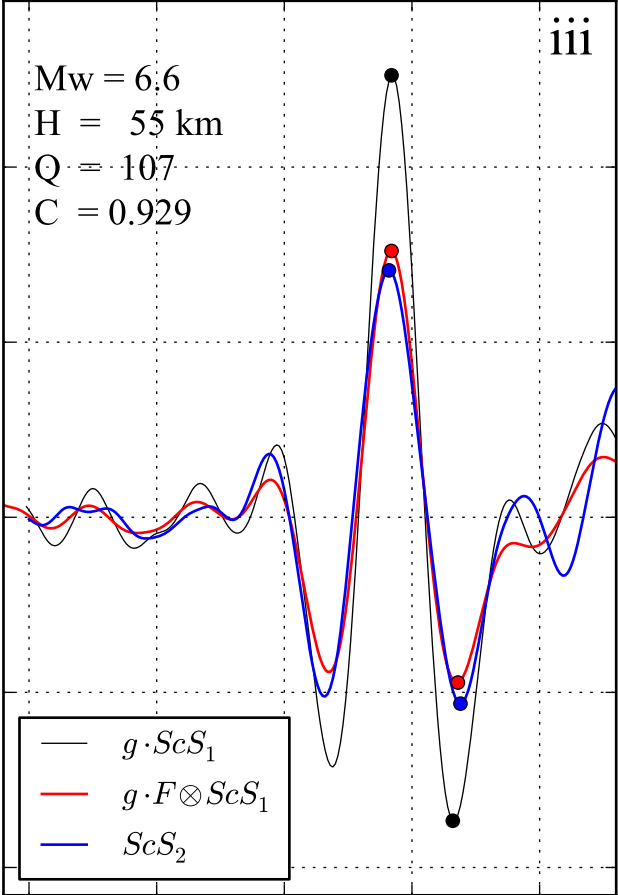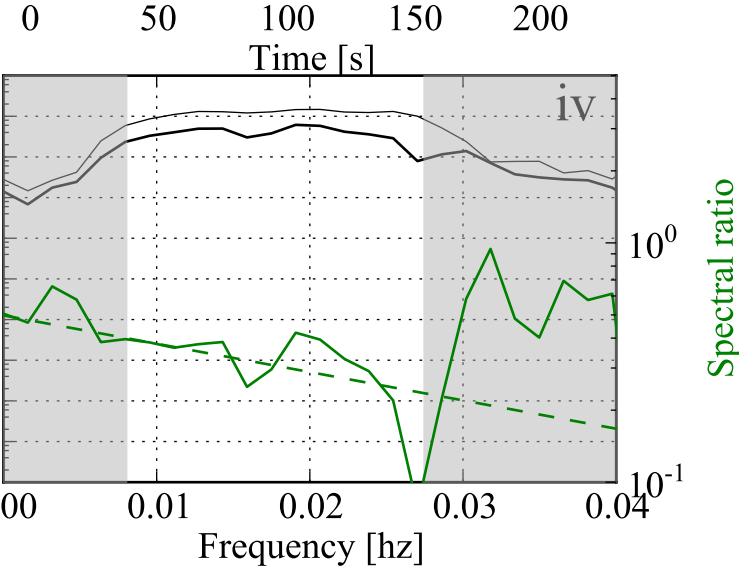

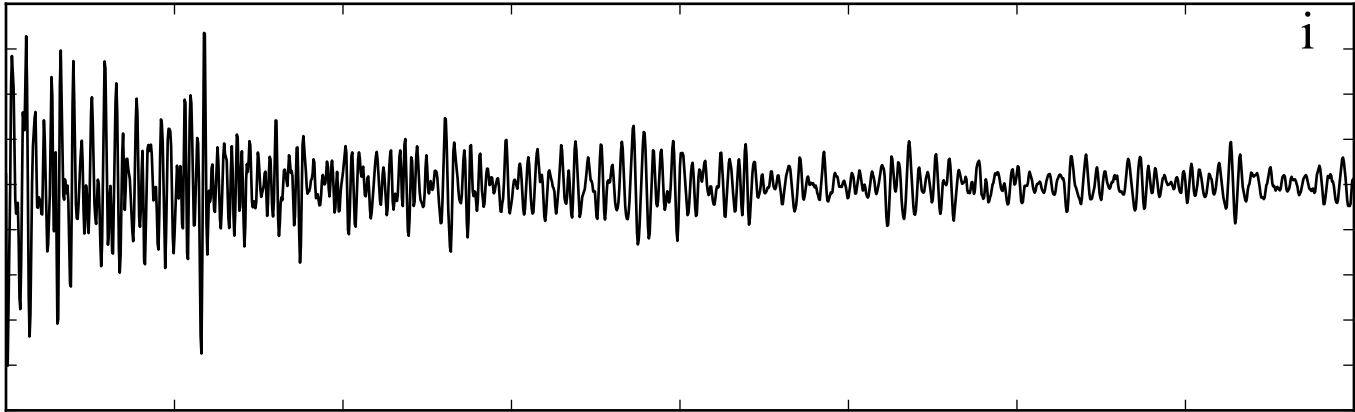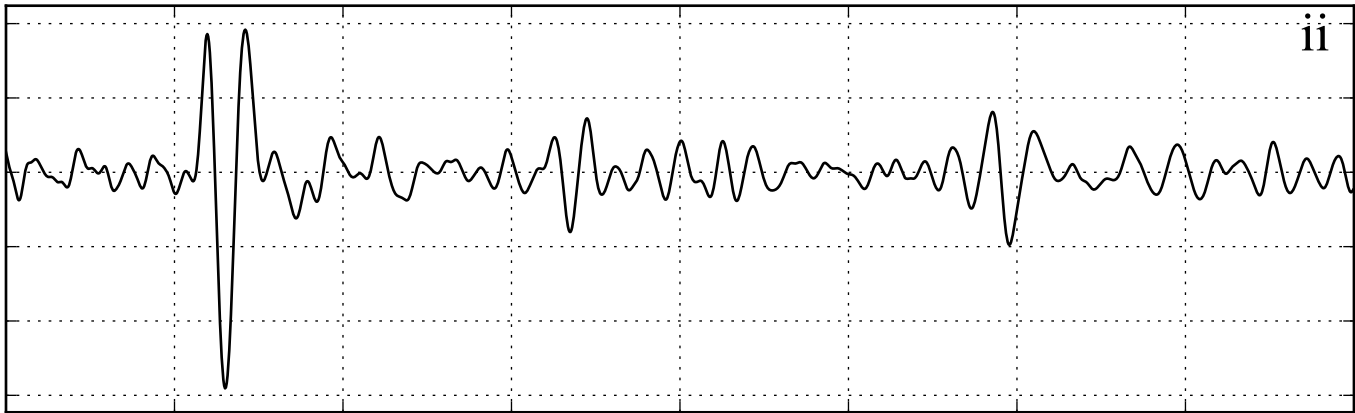

Time [s]

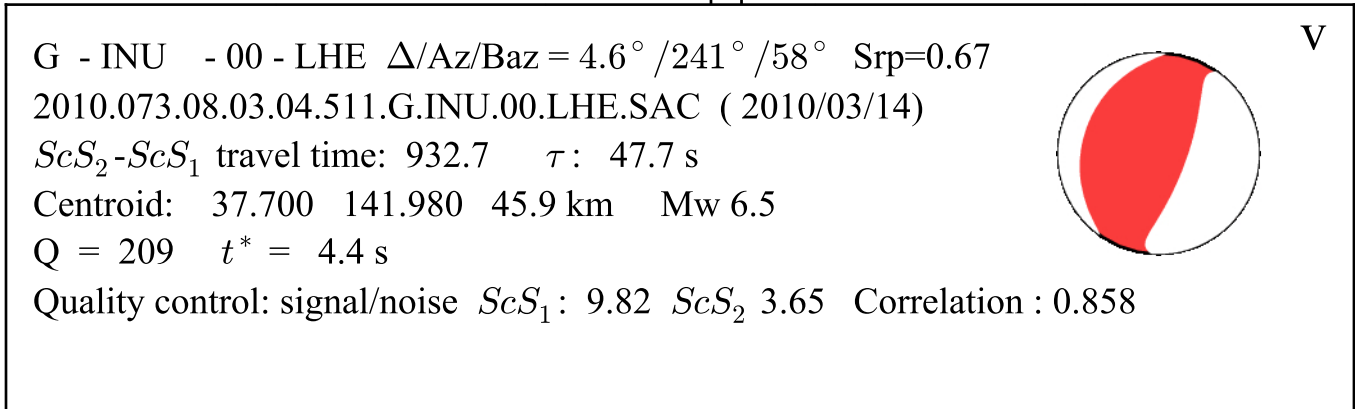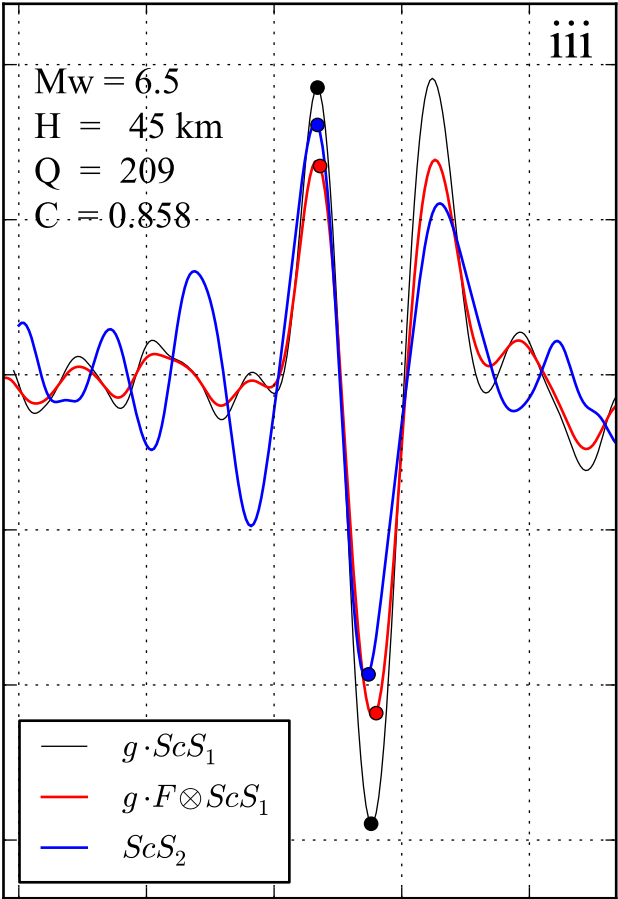

Time [s]

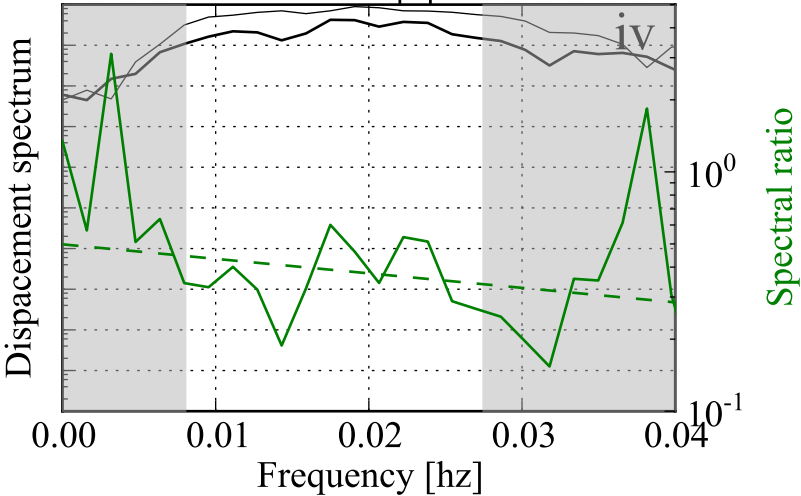

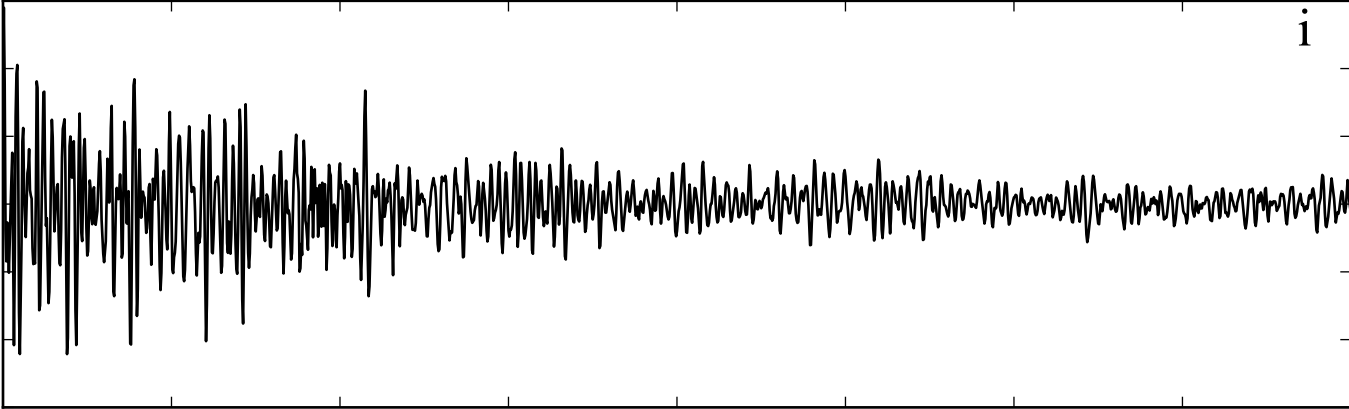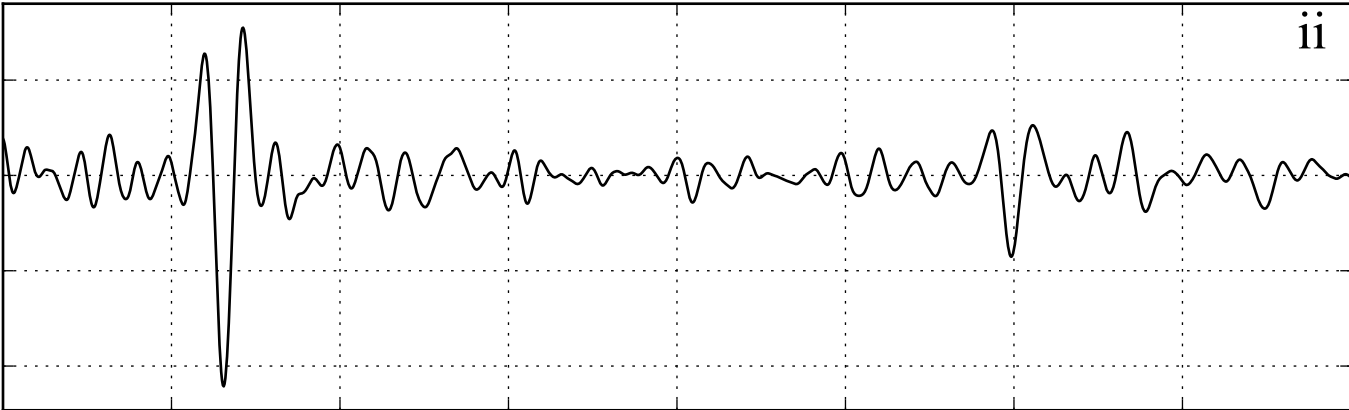

Time [s]

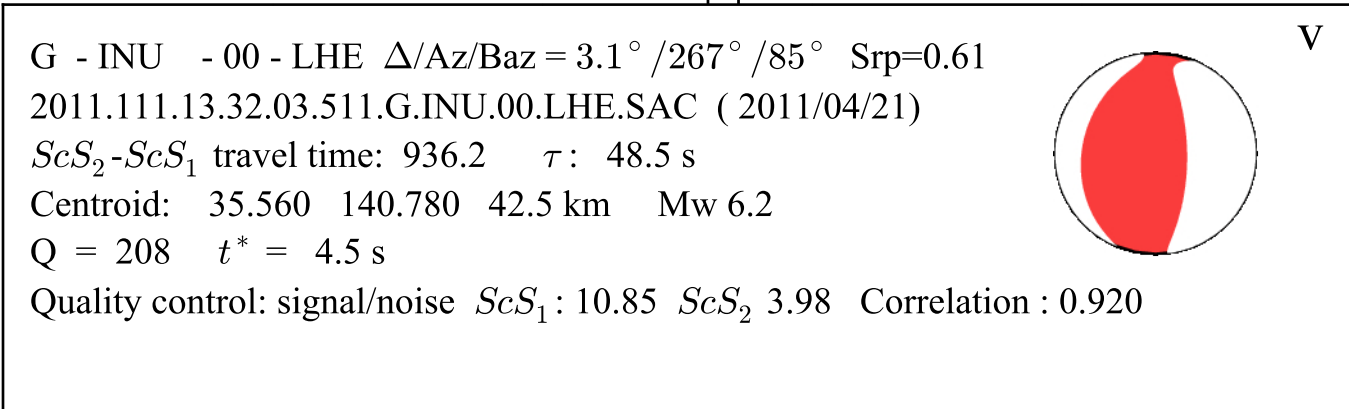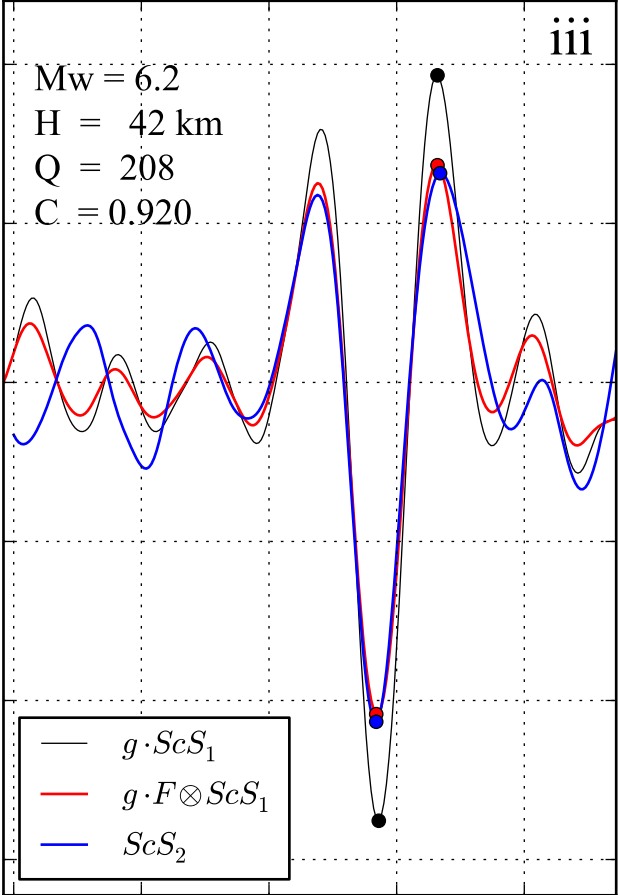

Time [s]

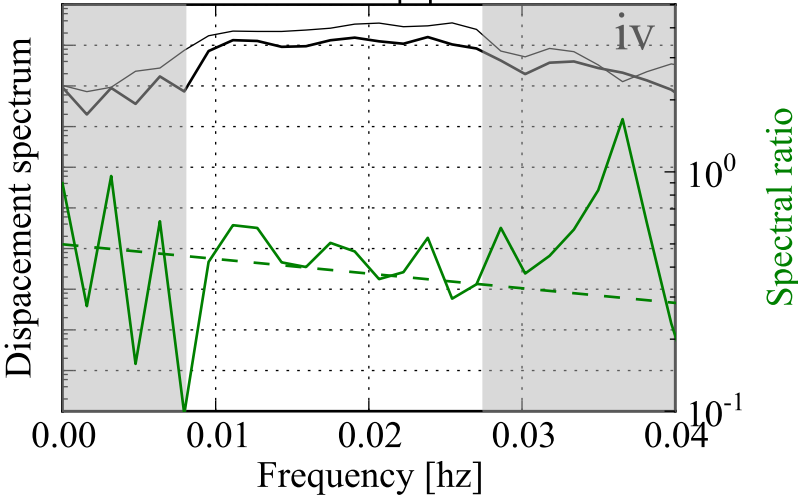

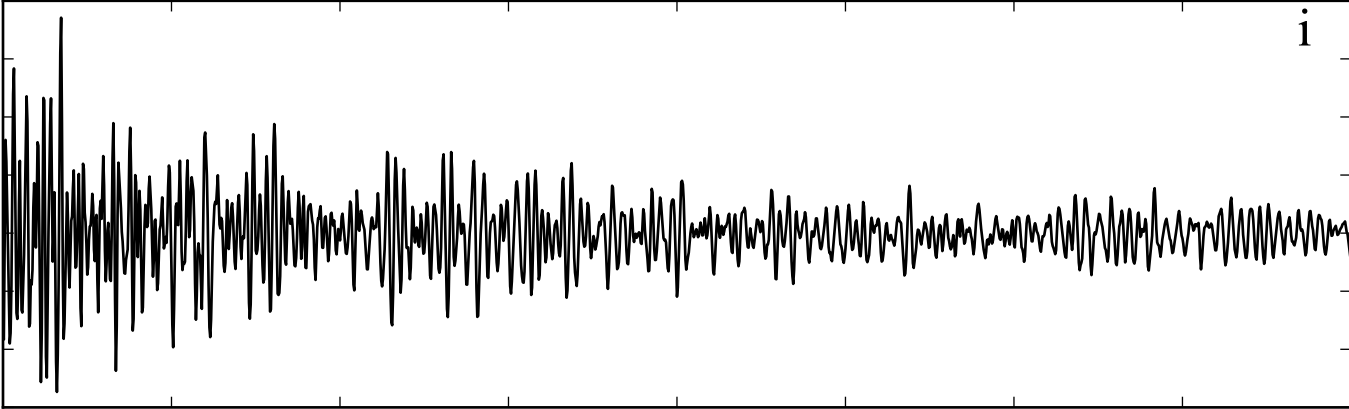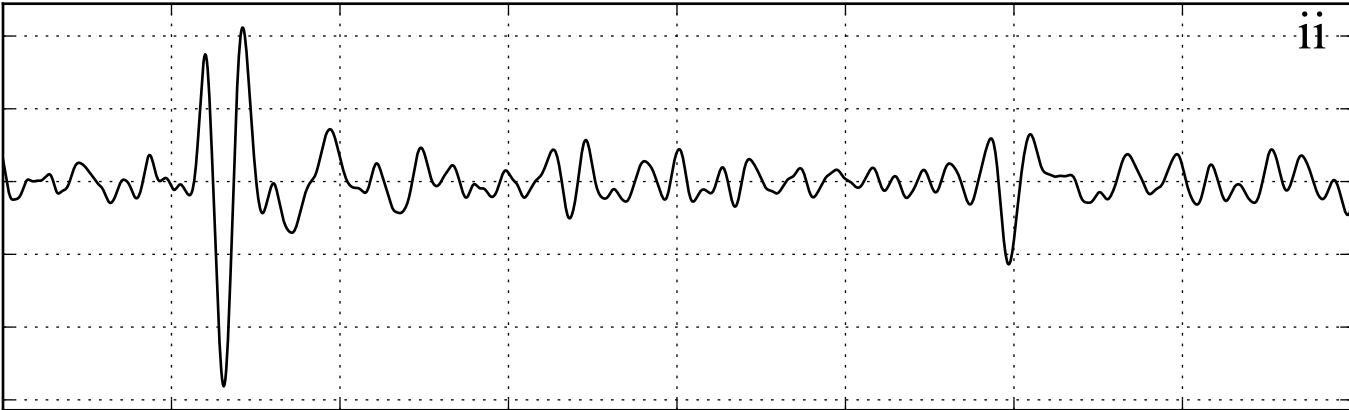

Time [s]

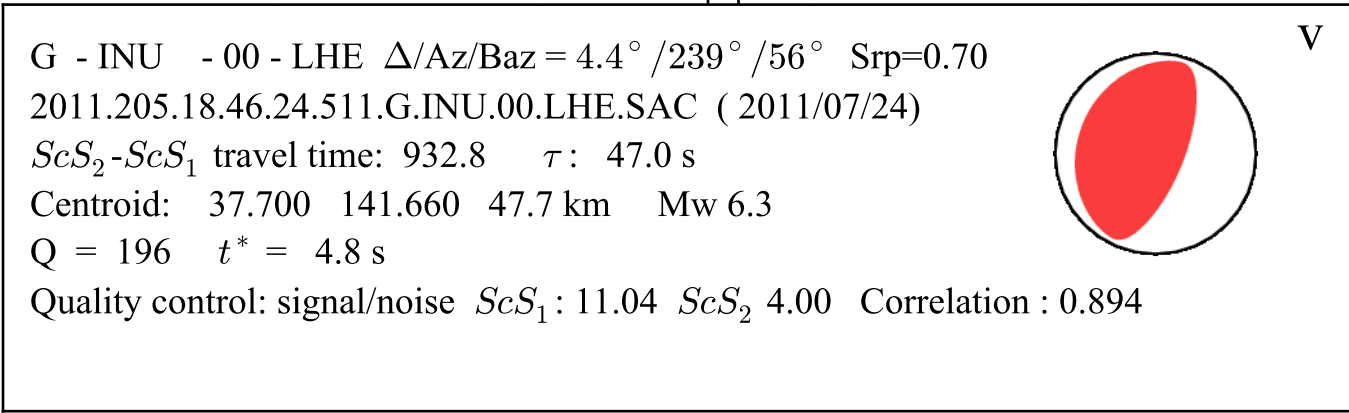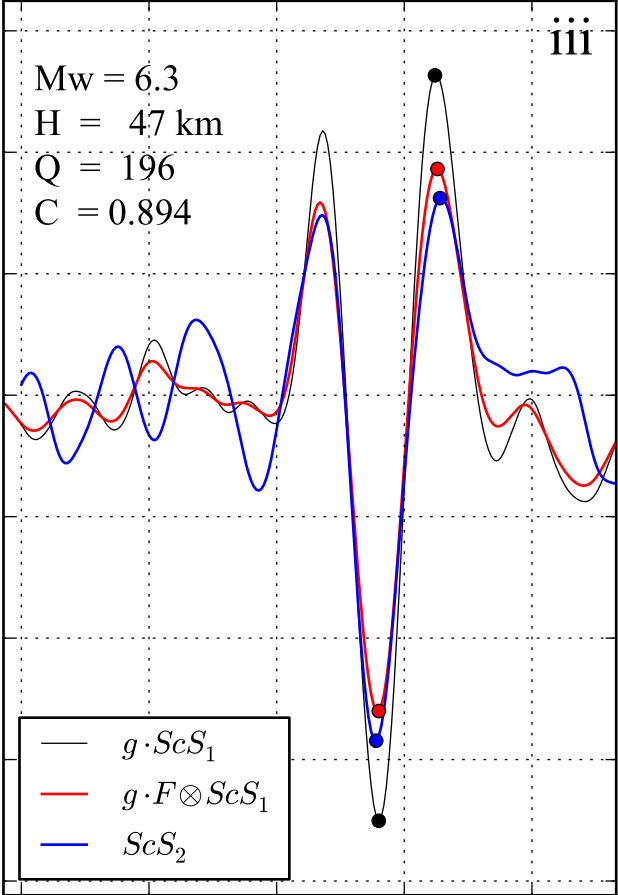

Time [s]

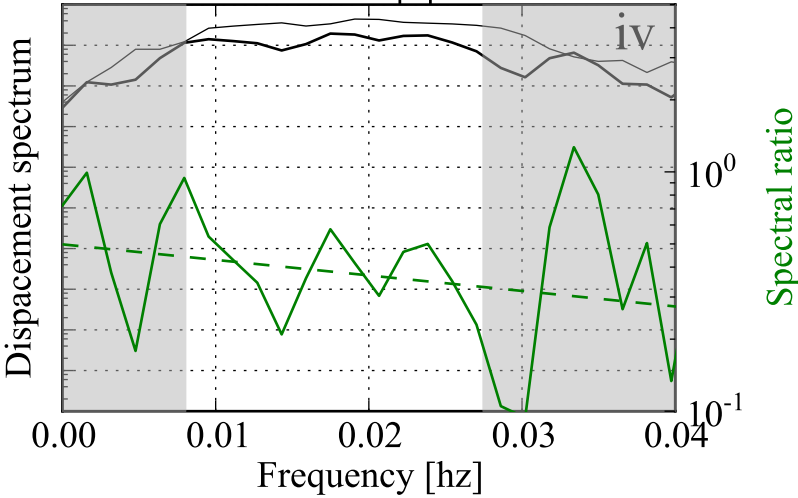

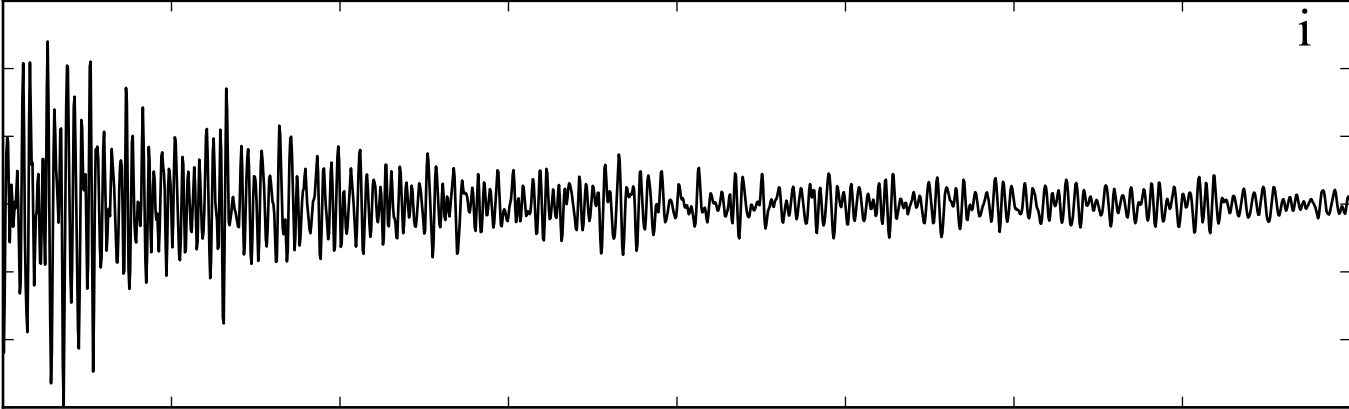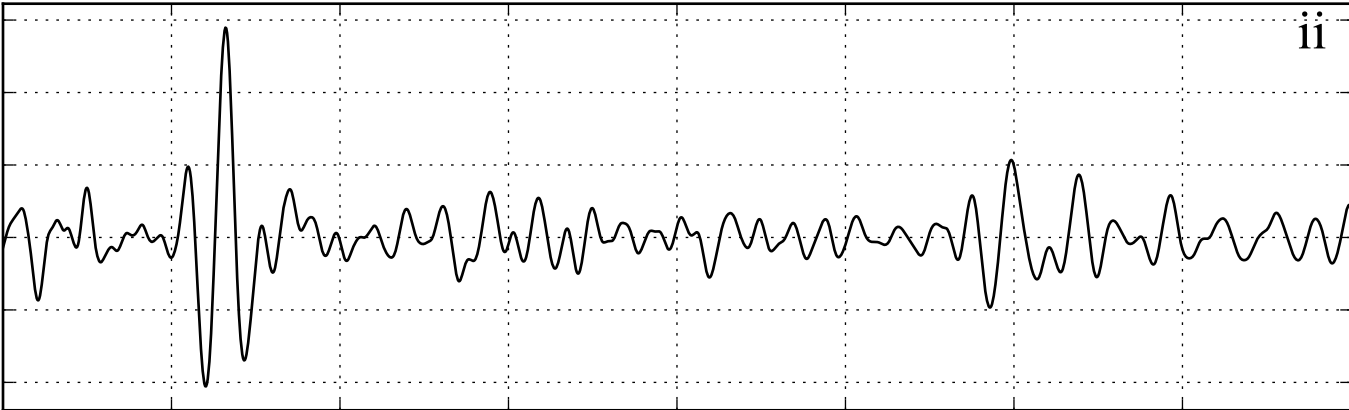

Time [s]

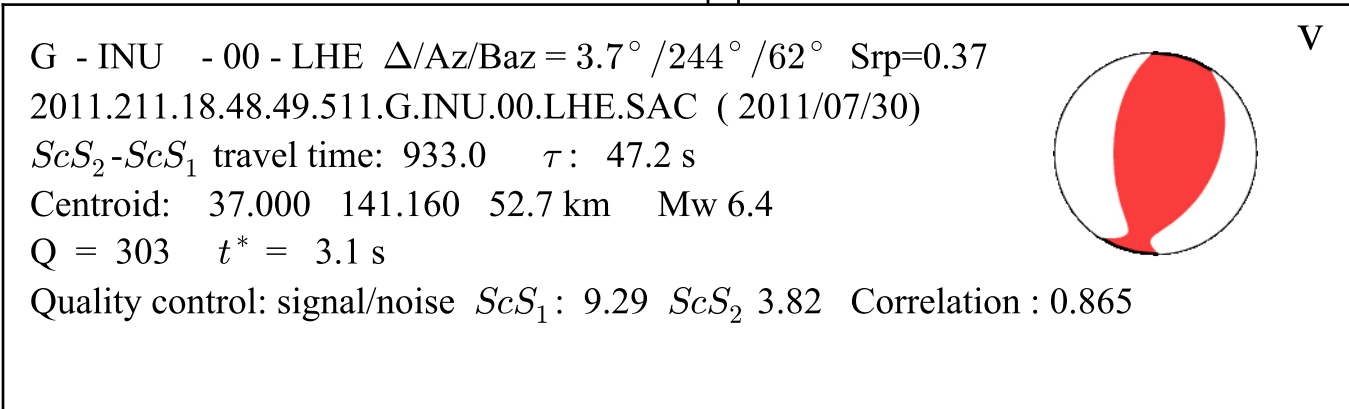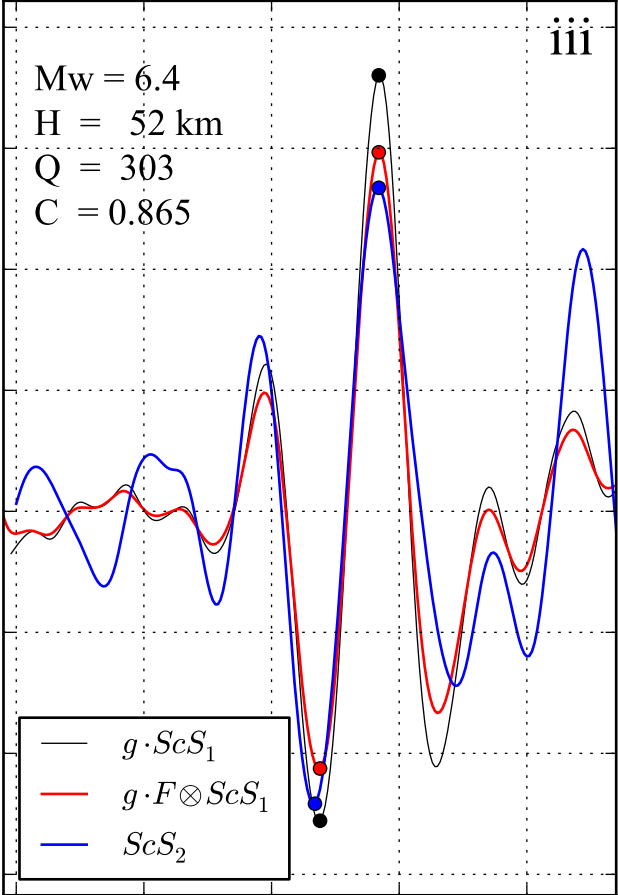

Time [s]

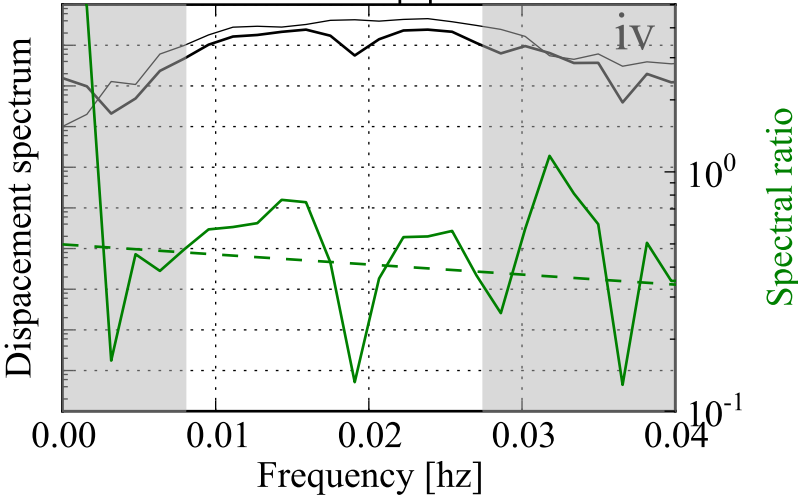



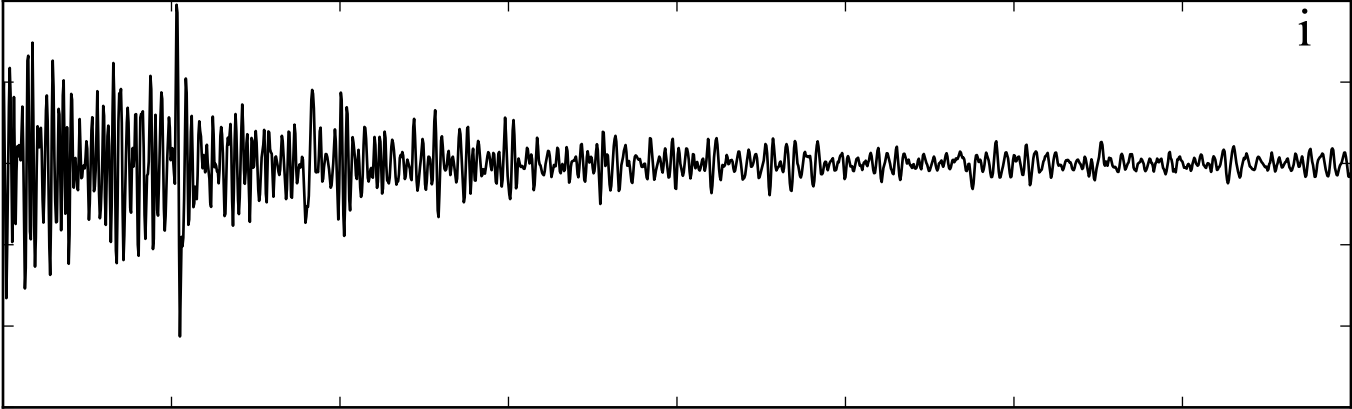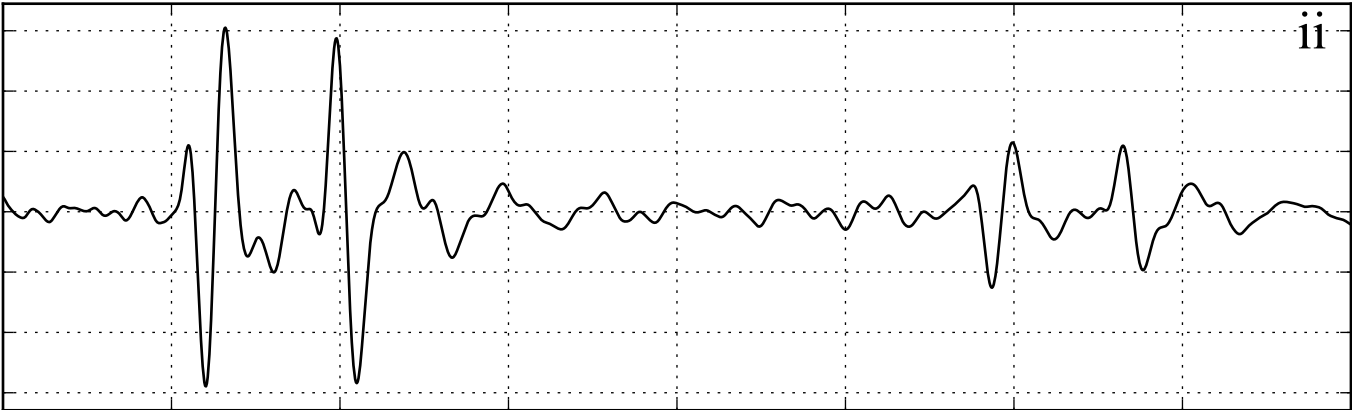

Time [s]

G - INU - 00 - LHE  $\Delta/Az/Baz = 3.8^\circ/345^\circ/165^\circ$   $Srp=0.93$   
2012.001.05.22.56.511.G.INU.00.LHE.SAC ( 2012/01/01)  
 $ScS_2-ScS_1$  travel time: 933.8  $\tau$ : 50.3 s  
Centroid: 31.610 138.170 352.0 km Mw 6.8  
 $Q = 324$   $t^* = 2.9$  s  
Quality control: signal/noise  $ScS_1$ : 16.12  $ScS_2$  6.52 Correlation : 0.959

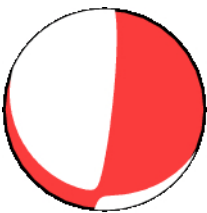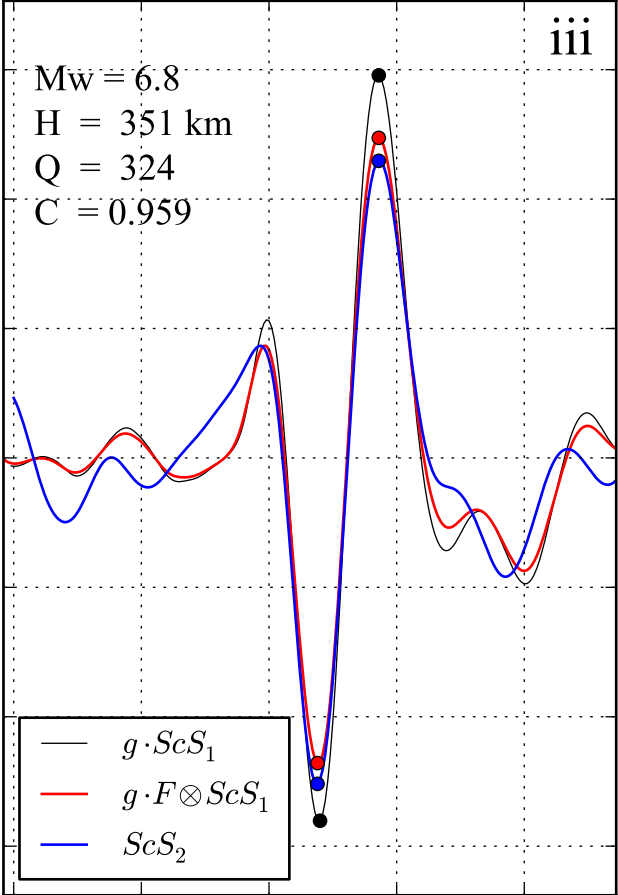

Time [s]

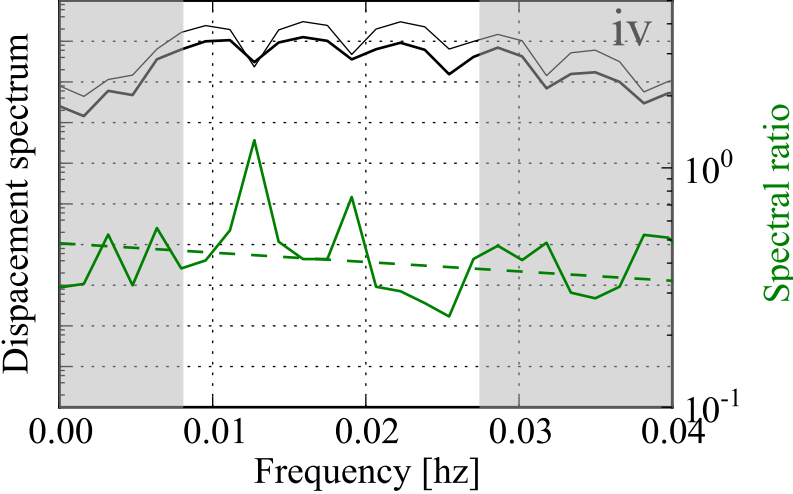

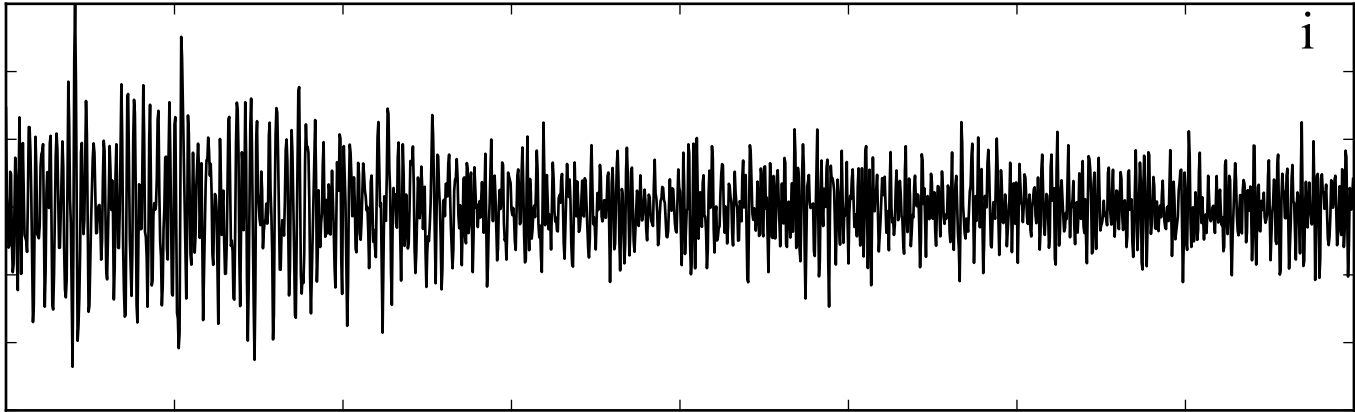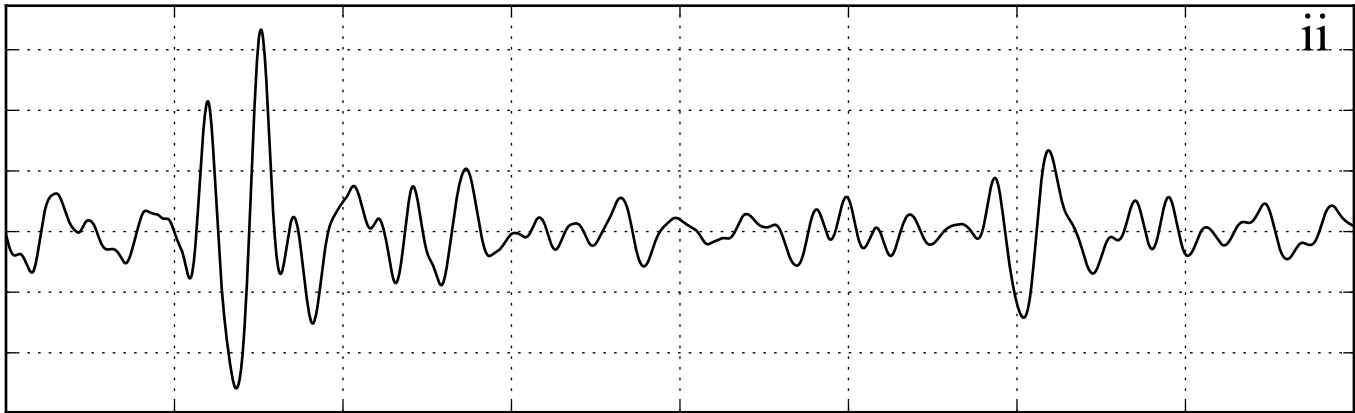

Time [s]

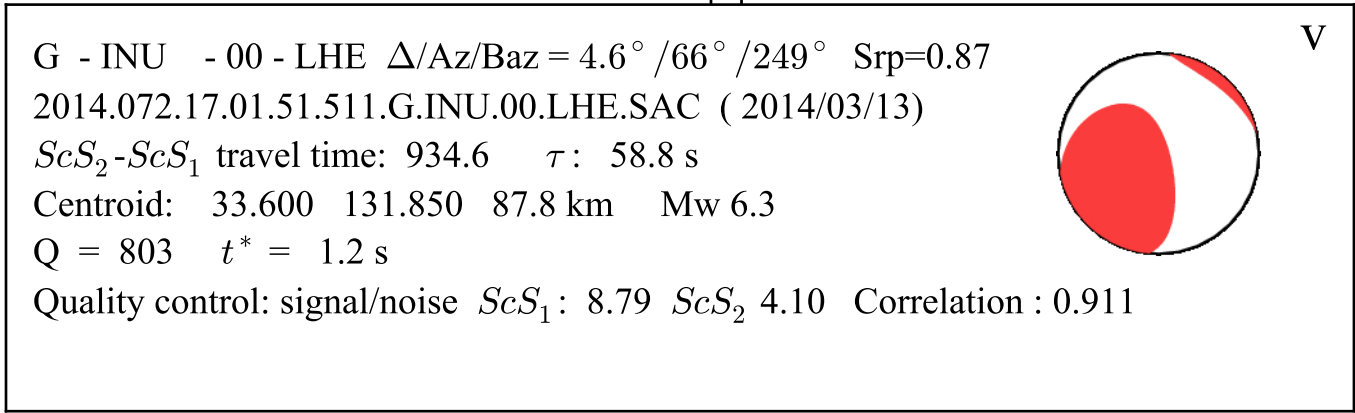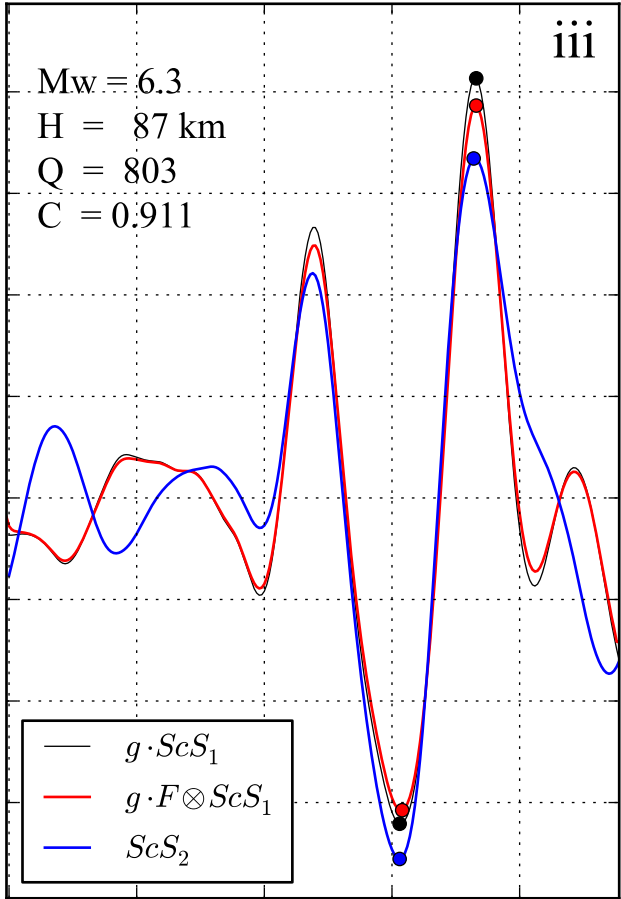

Time [s]

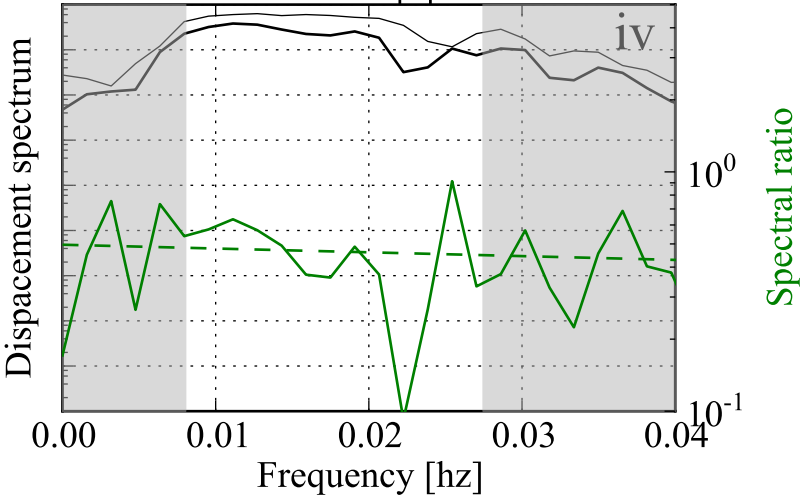

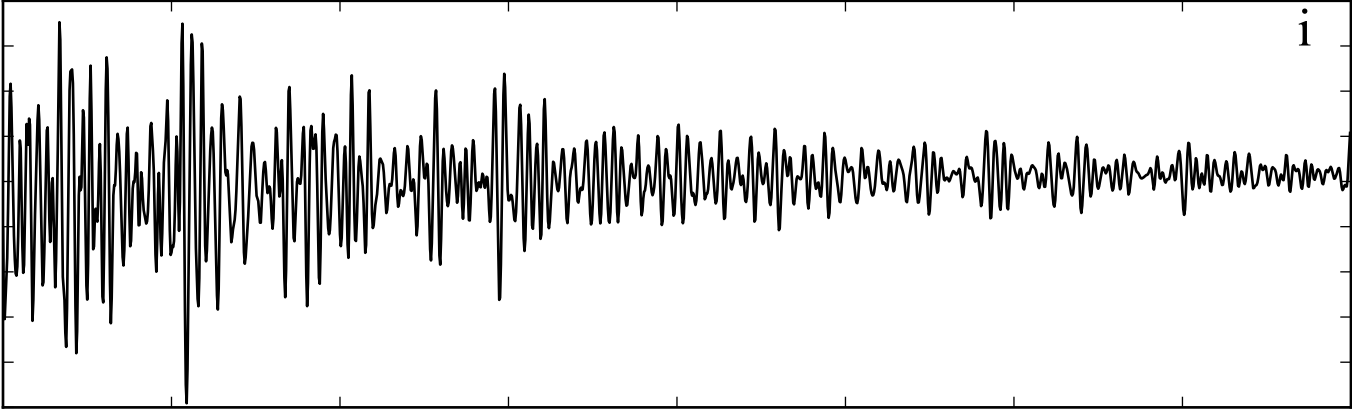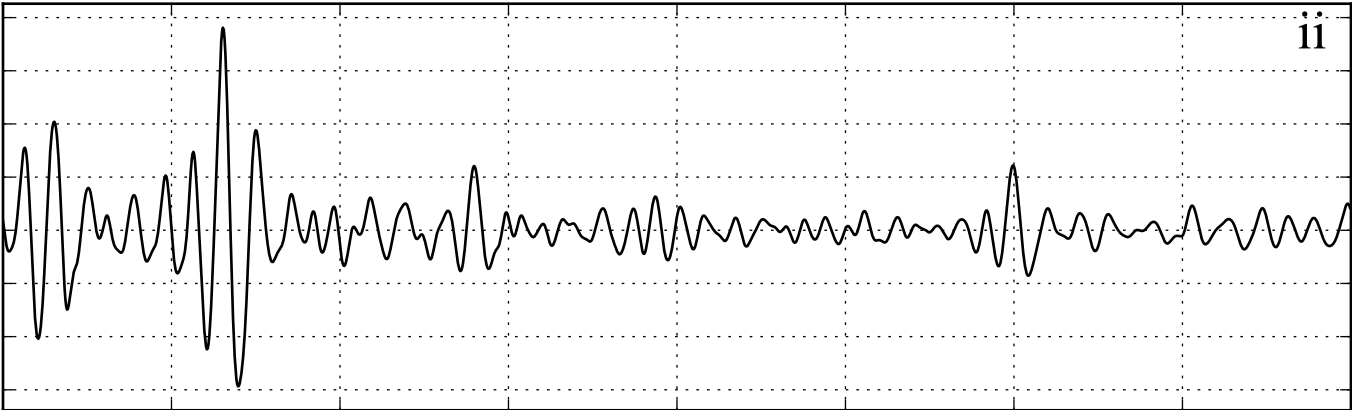

Time [s]

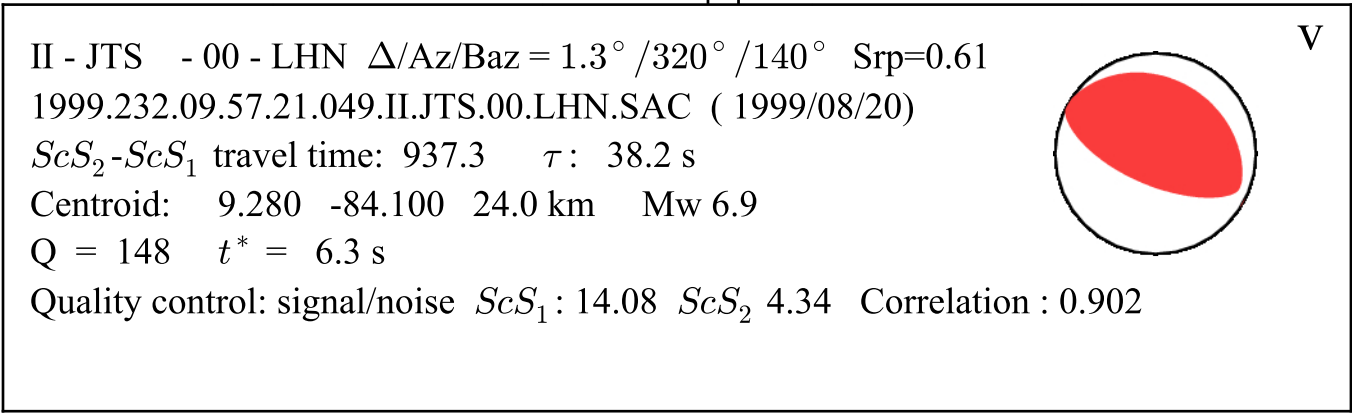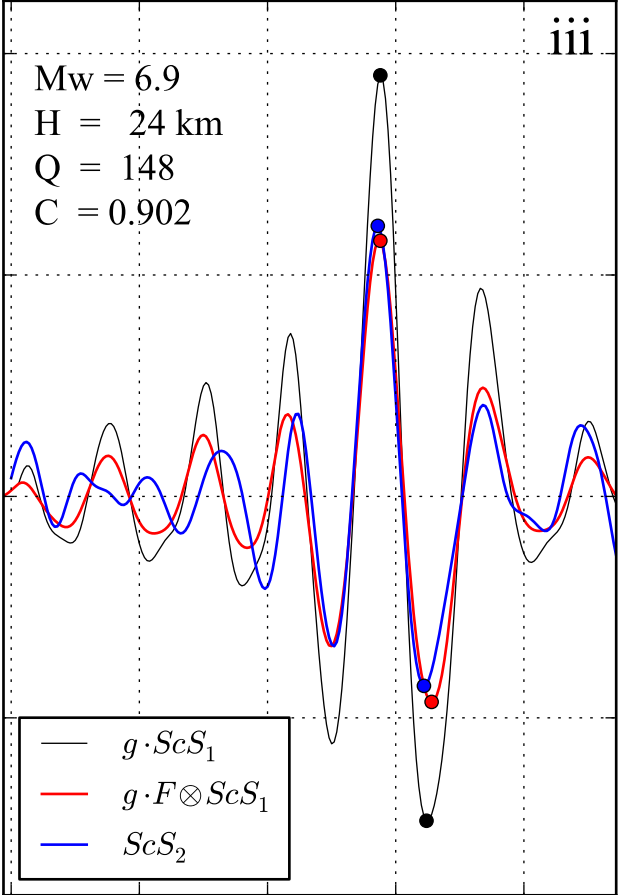

Time [s]

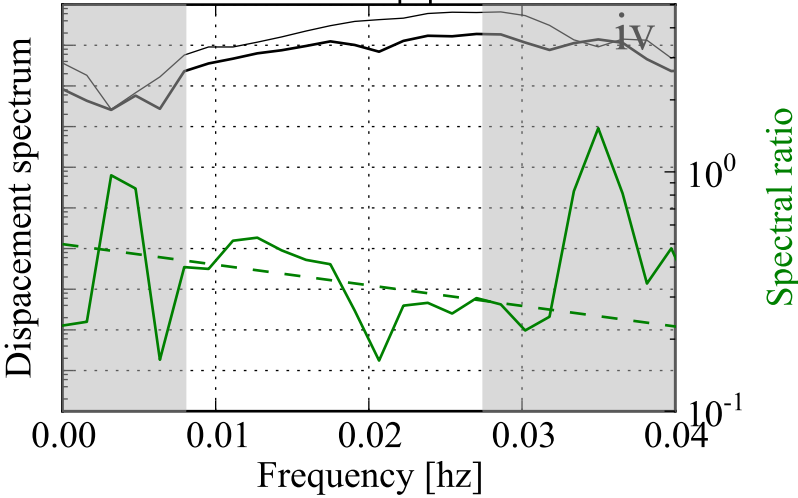

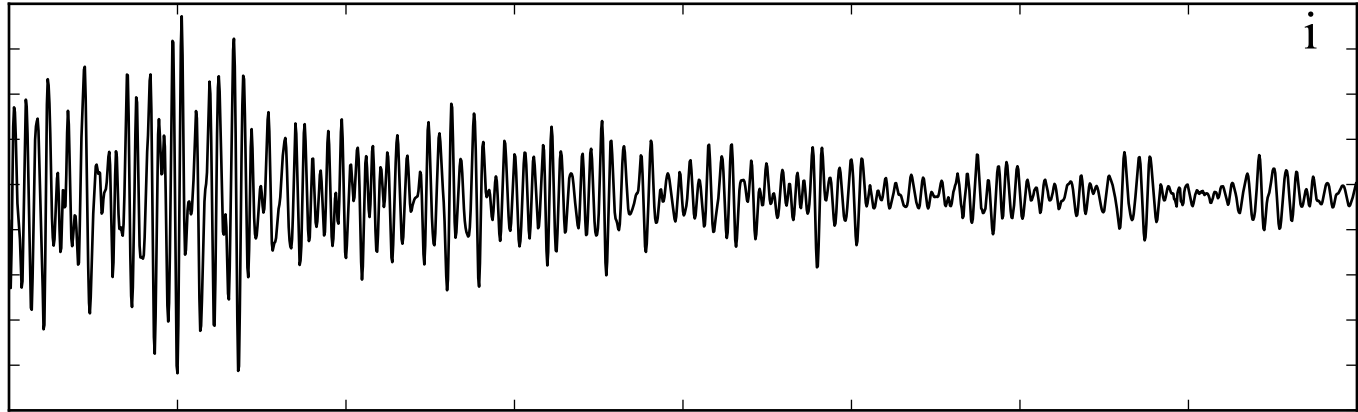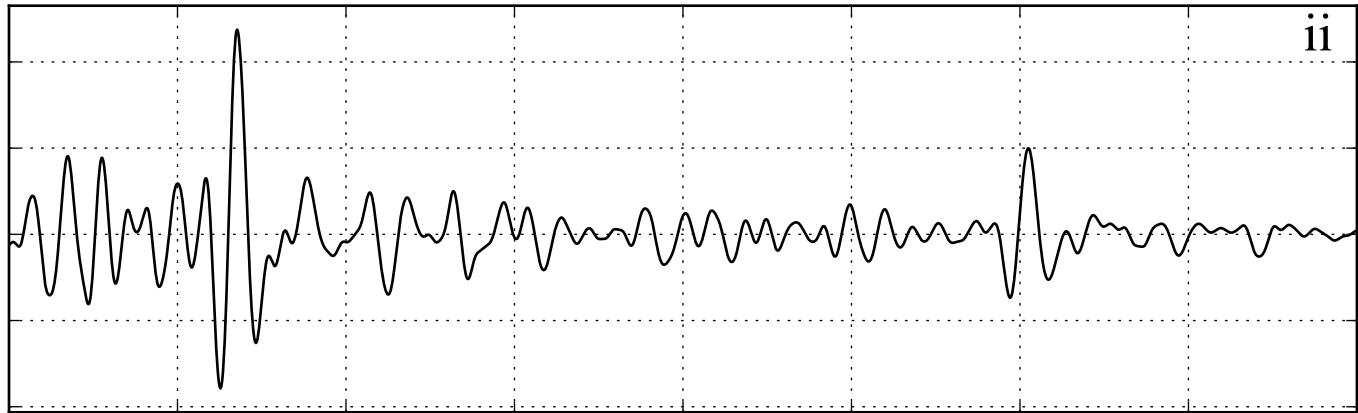

Time [s]

II - JTS - 00 - LH2  $\Delta/Az/Baz = 0.7^\circ / 66^\circ / 246^\circ$  Srp=0.84

2012.249.14.37.07.069.II.JTS.00.LH2.SAC ( 2012/09/05)

$ScS_2$ - $ScS_1$  travel time: 936.3  $\tau$ : 42.7 s

Centroid: 10.000 -85.640 29.7 km Mw 7.6

$Q = 385$   $t^* = 2.4$  s

Quality control: signal/noise  $ScS_1$ : 9.31  $ScS_2$  3.88 Correlation : 0.932

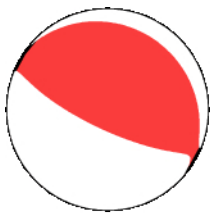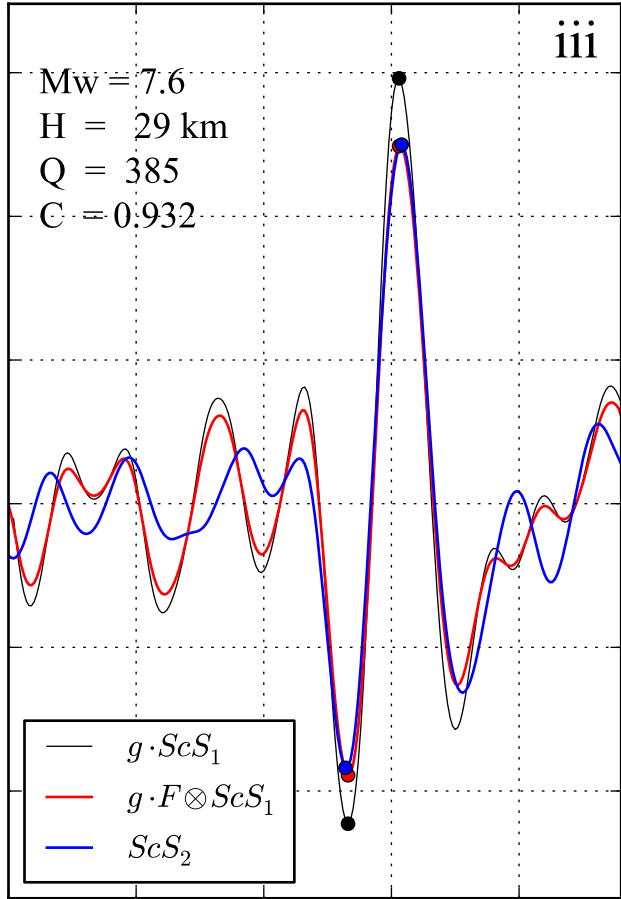

Time [s]

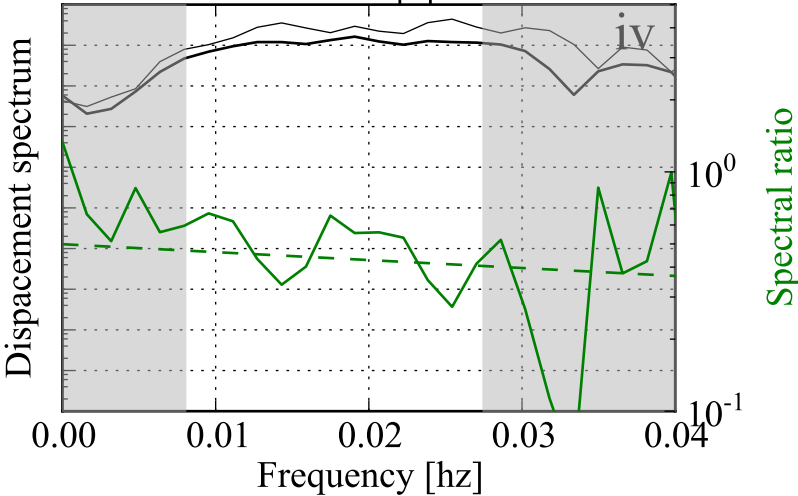

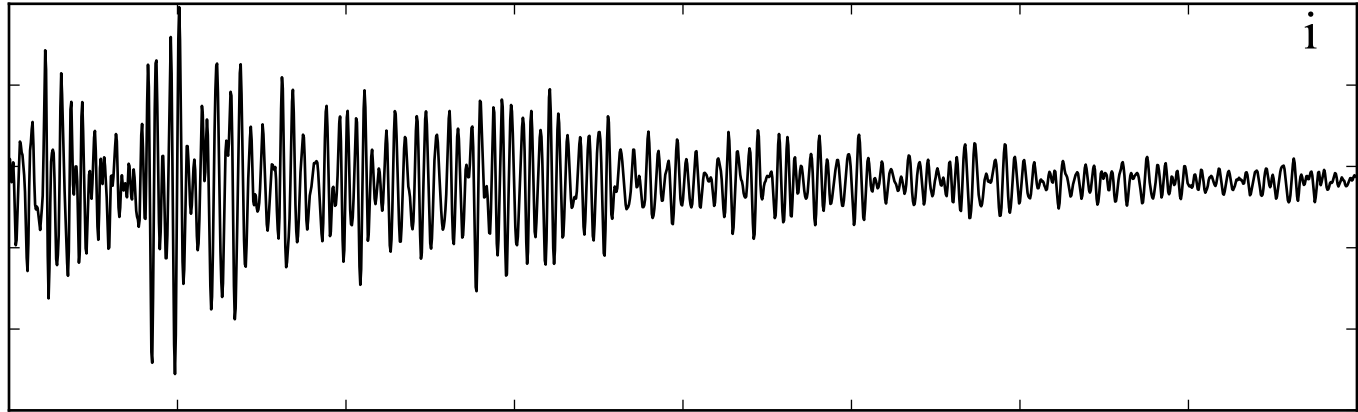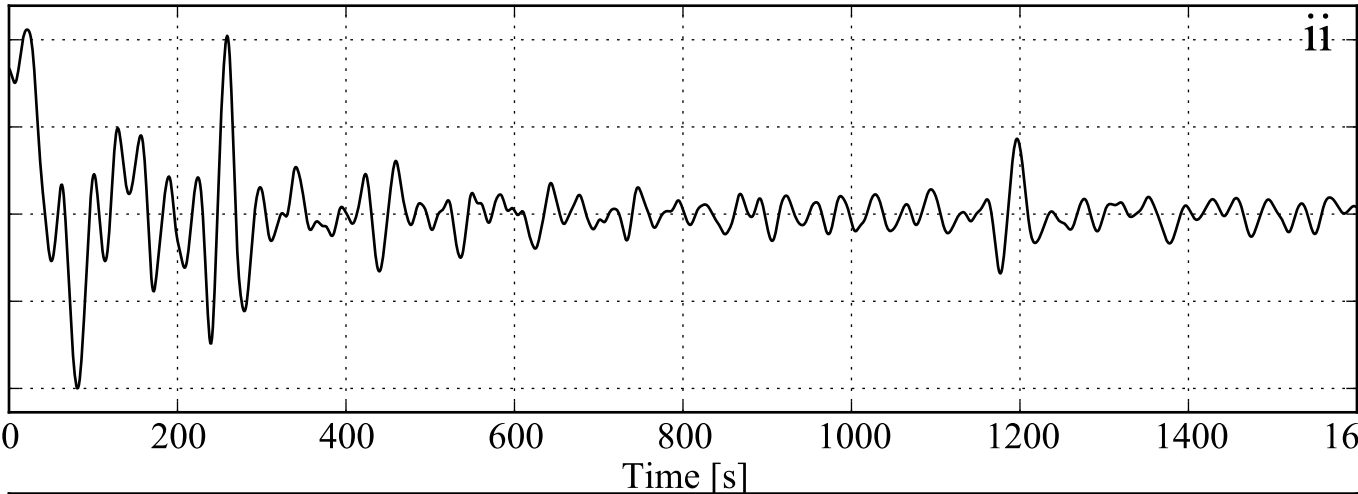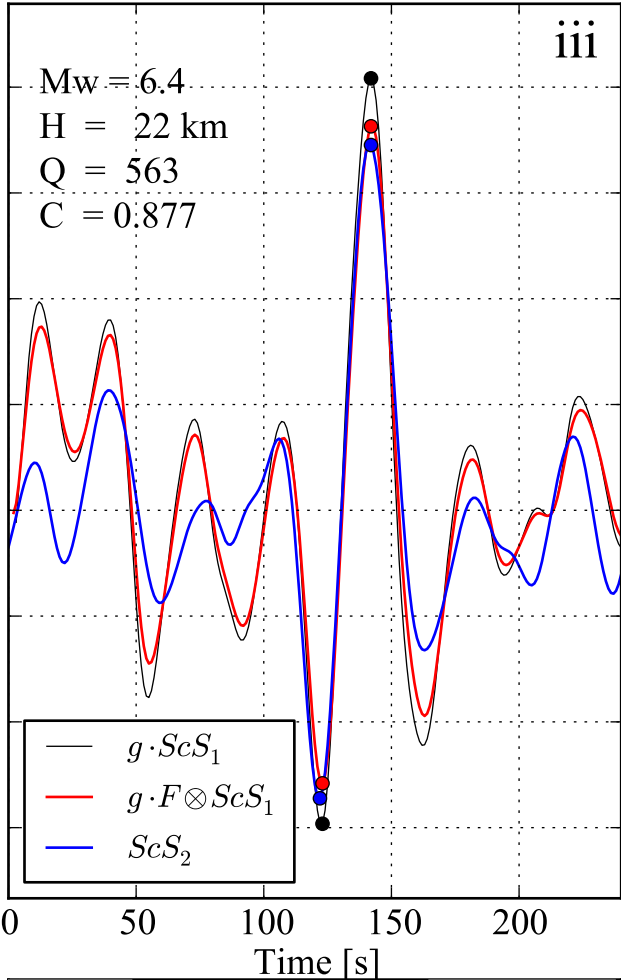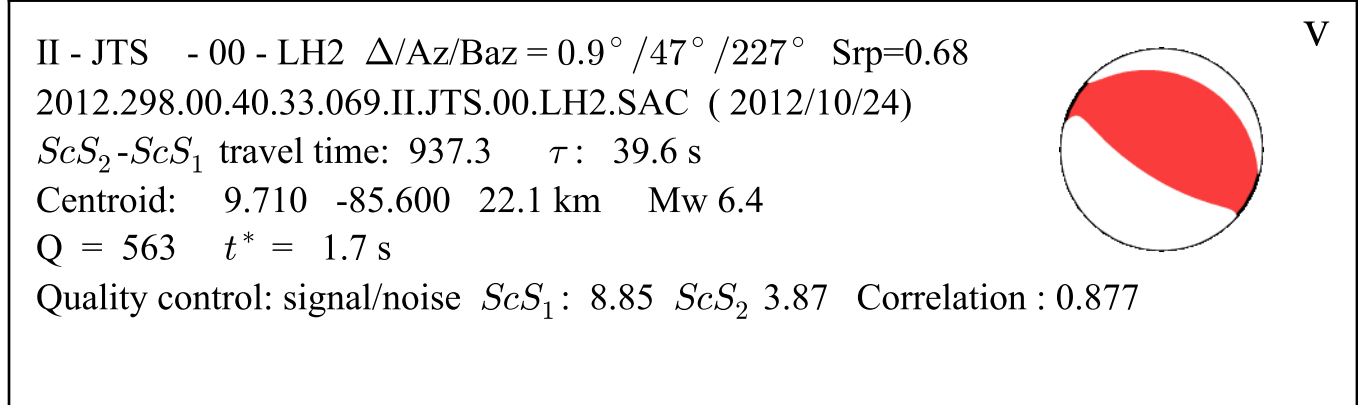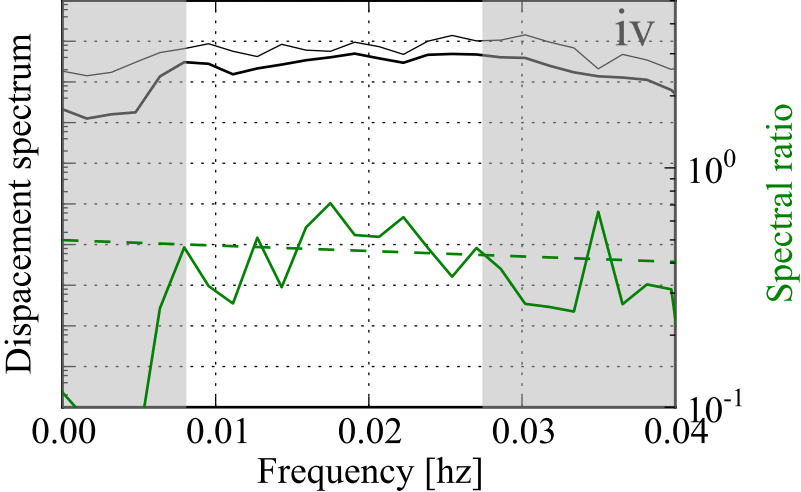

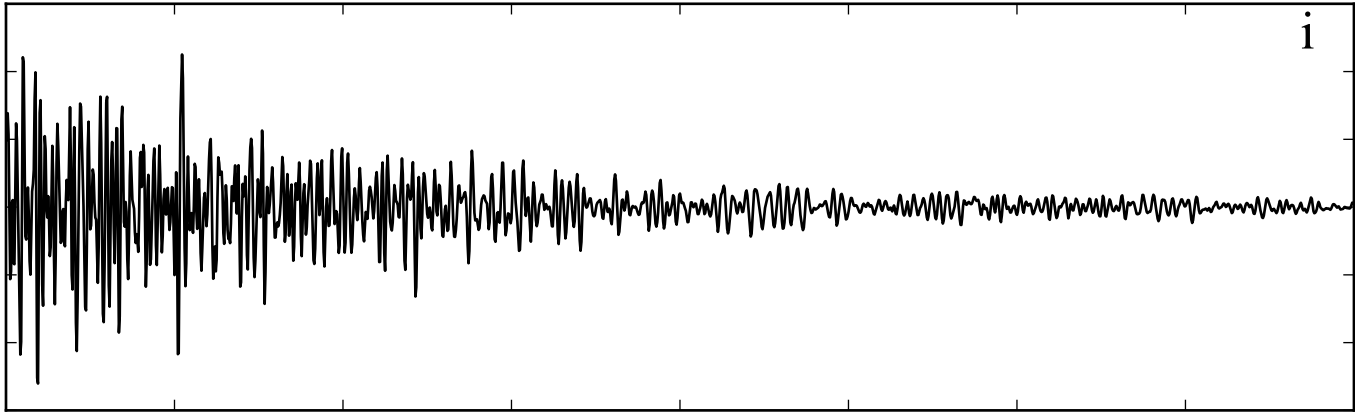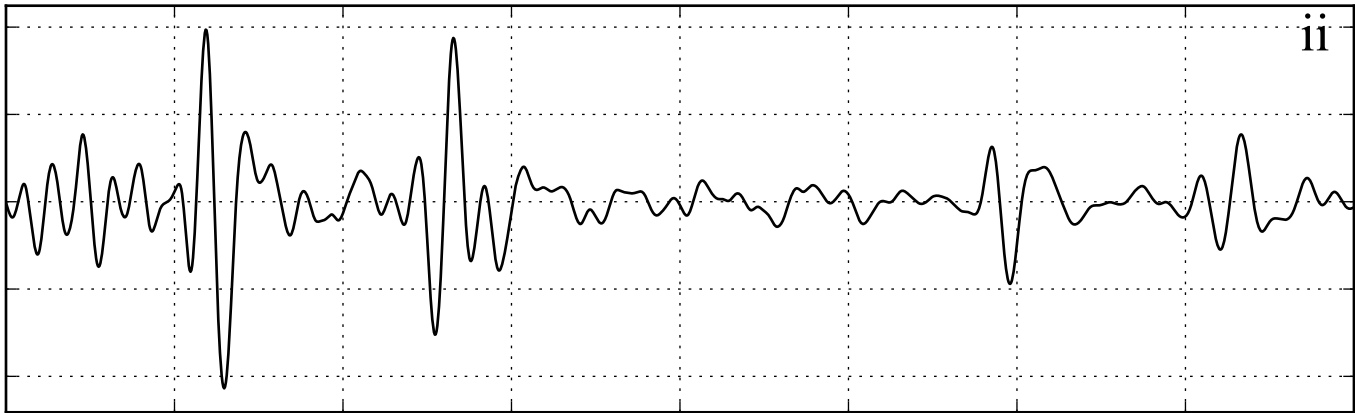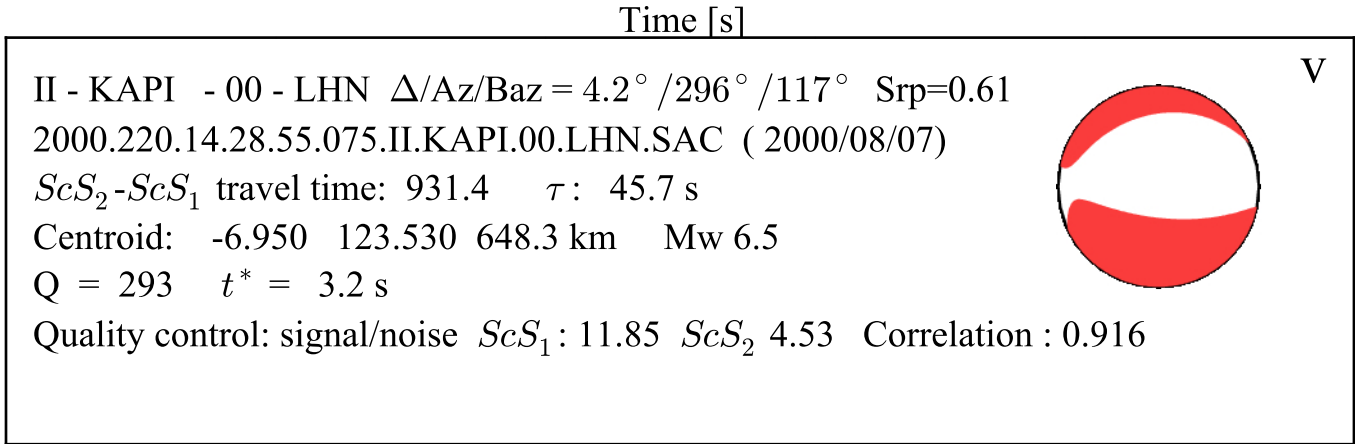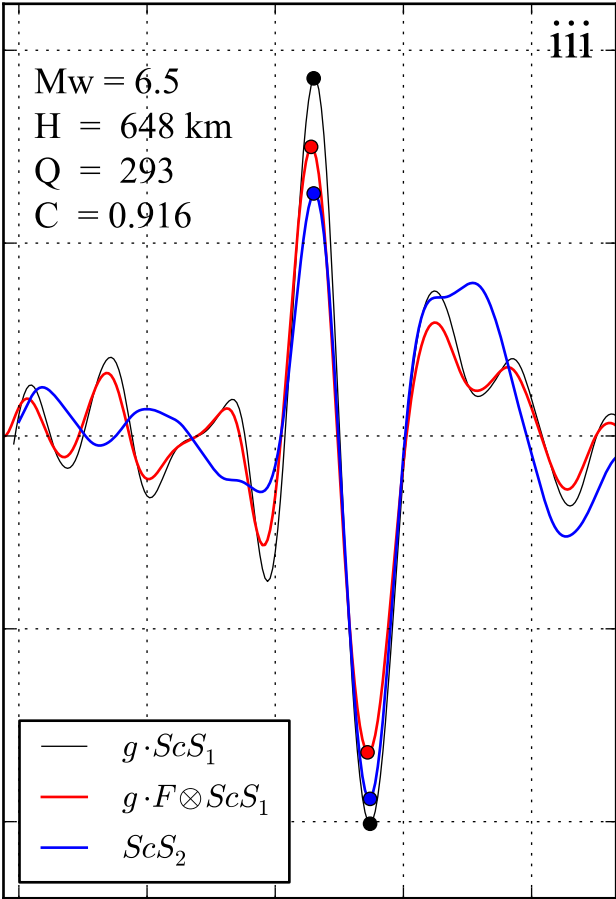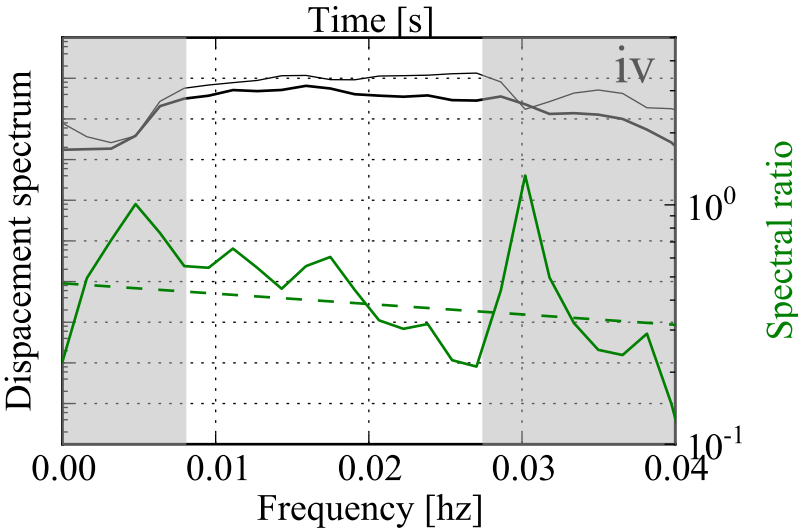

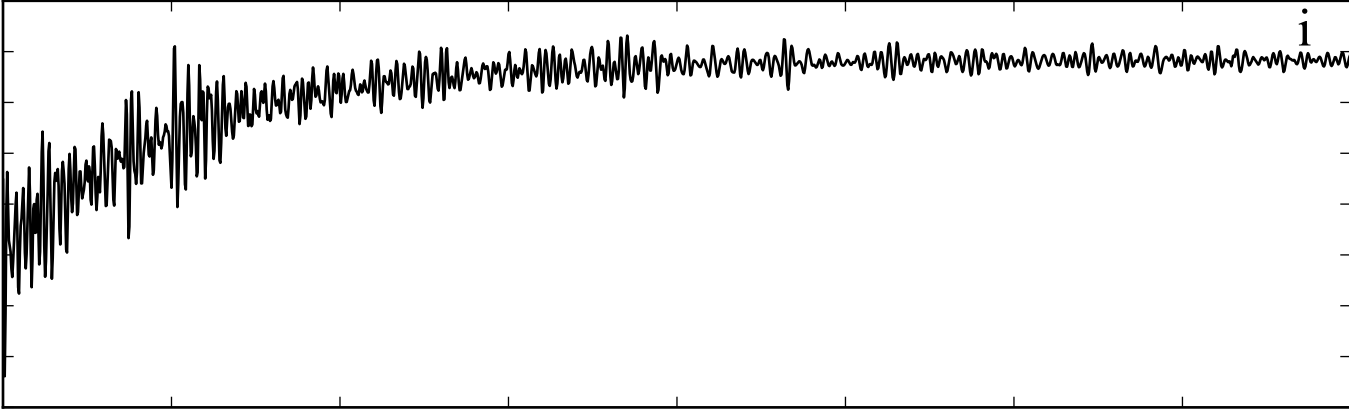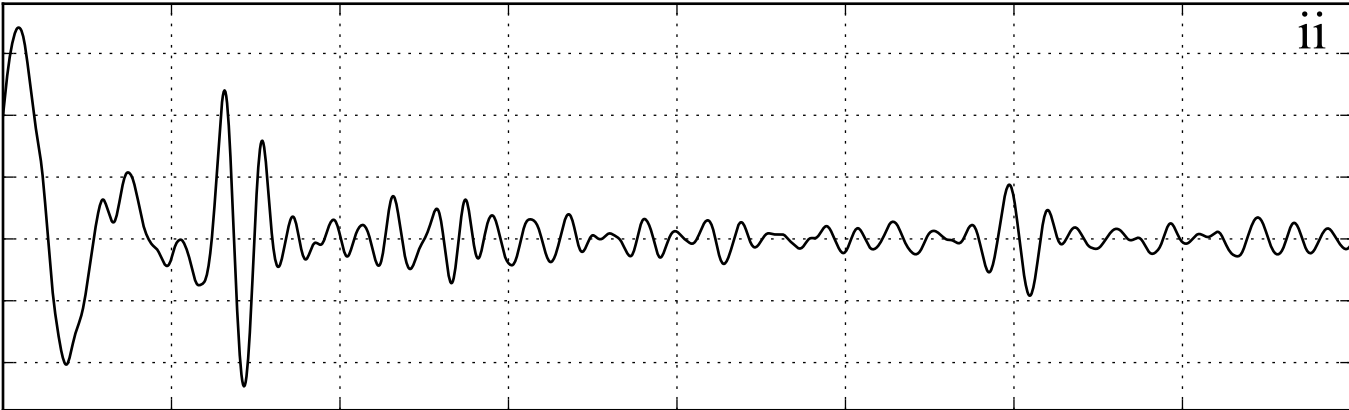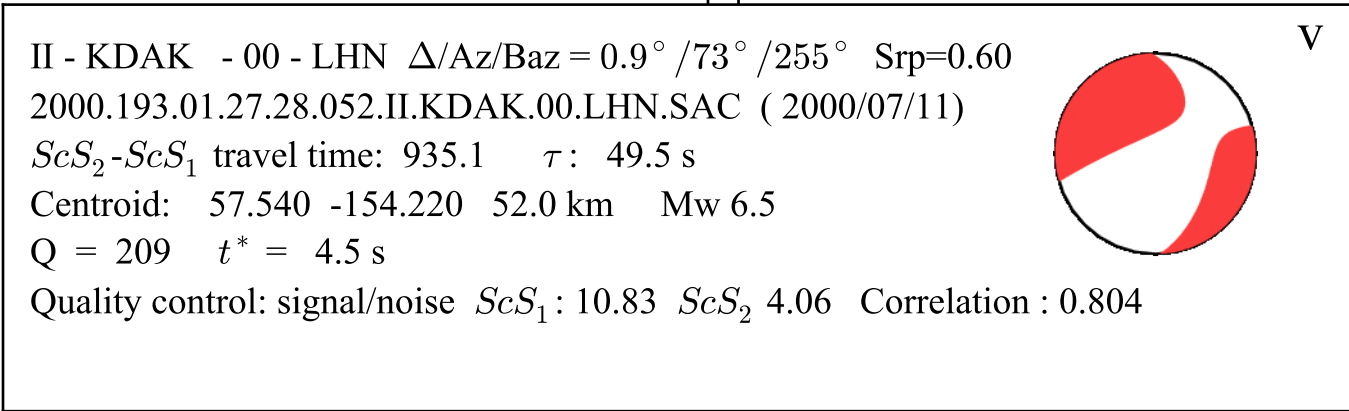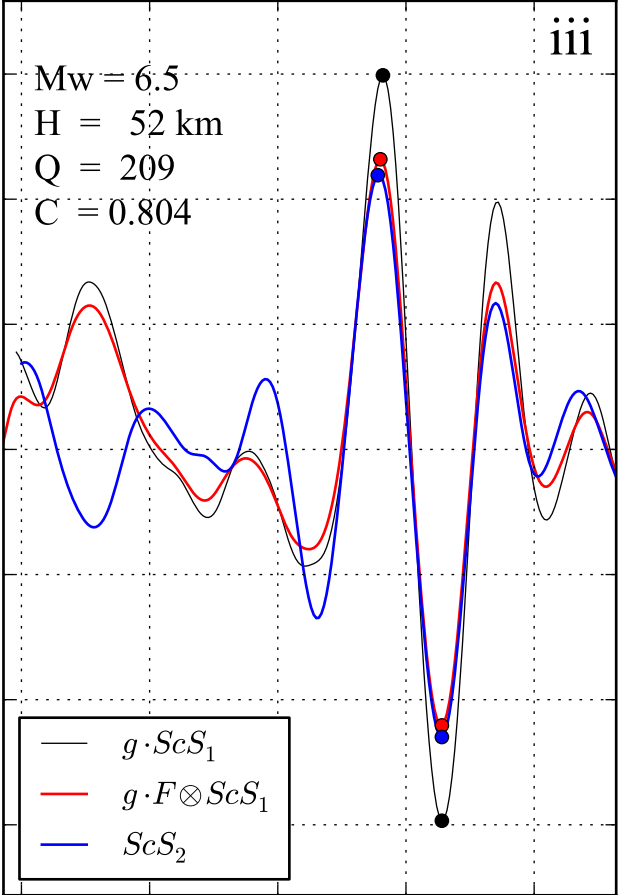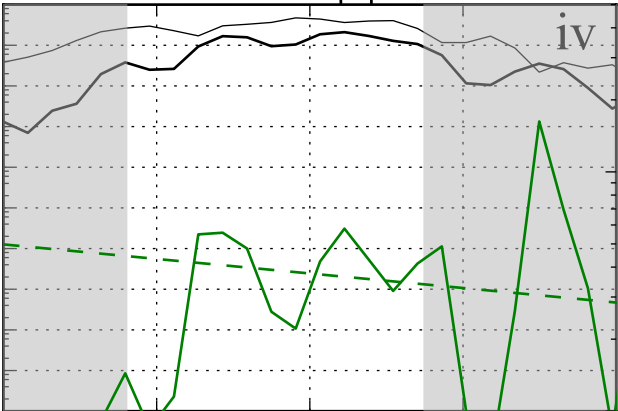

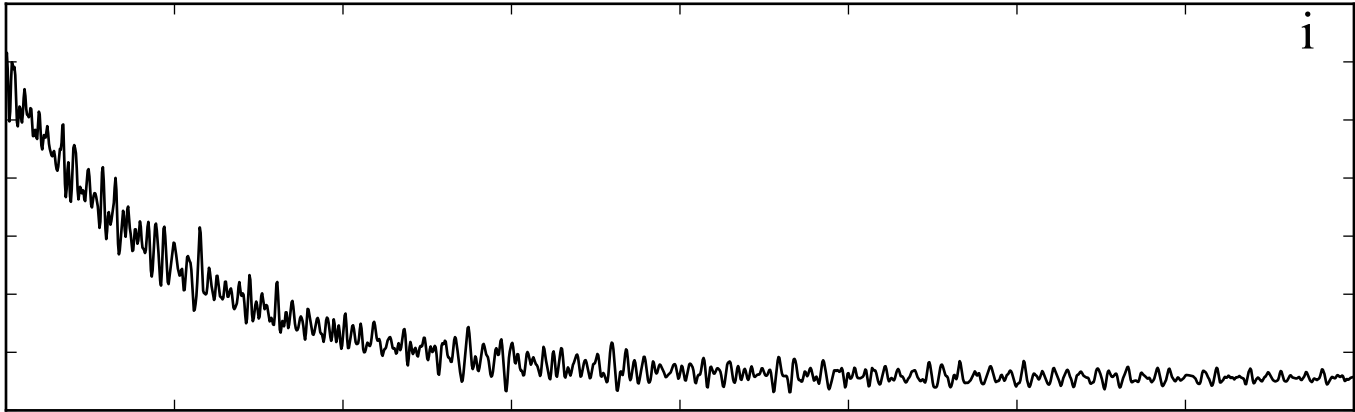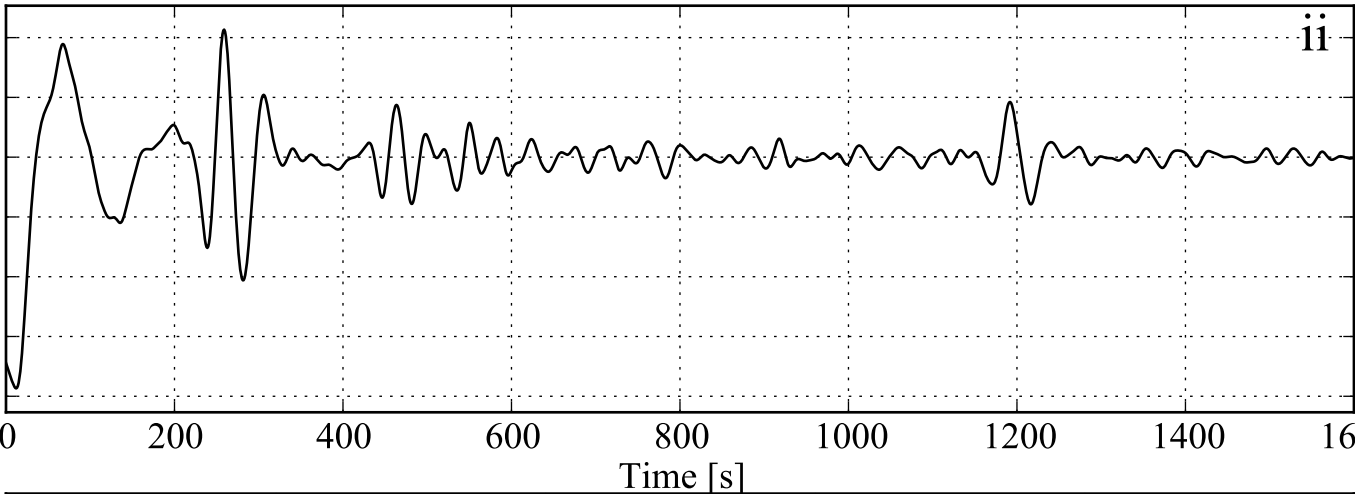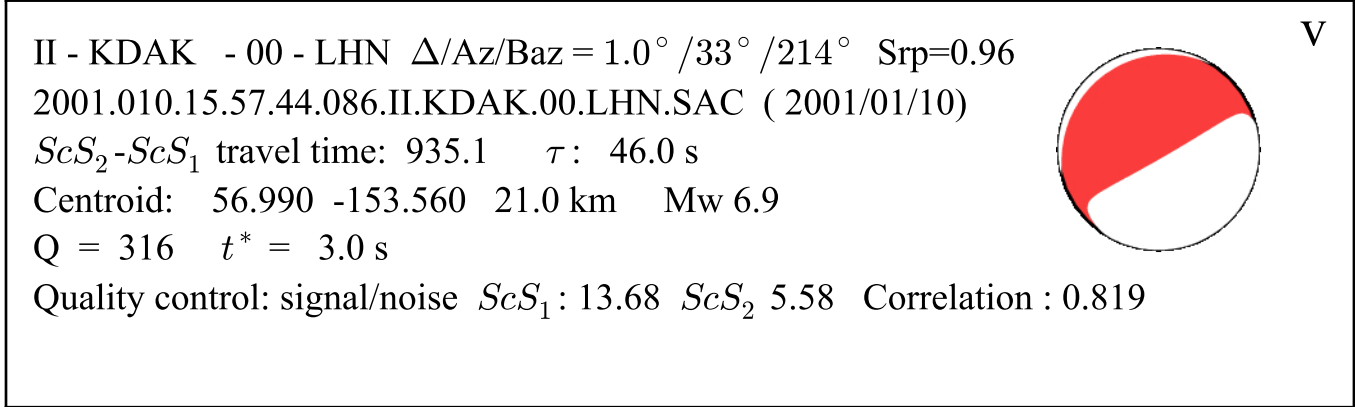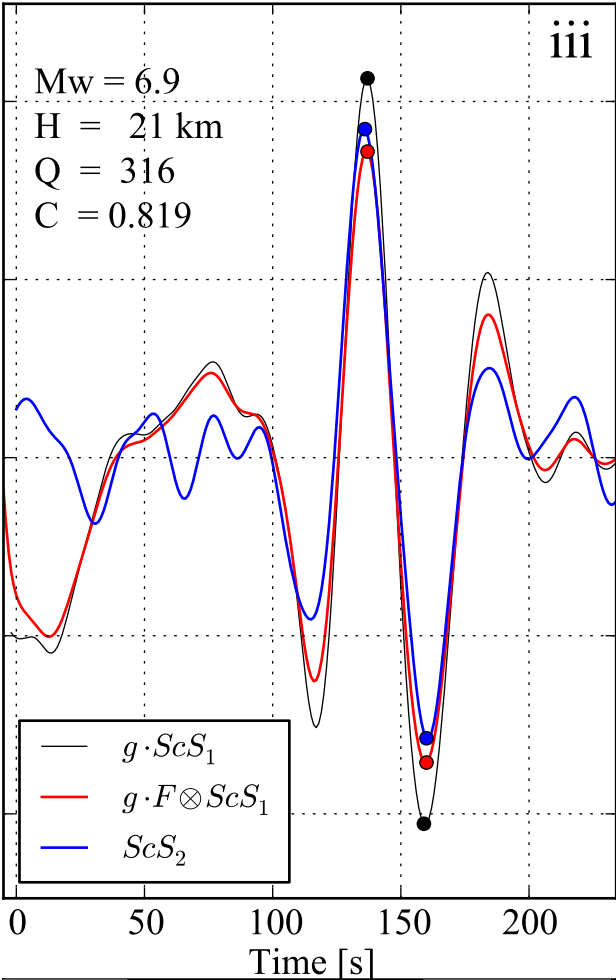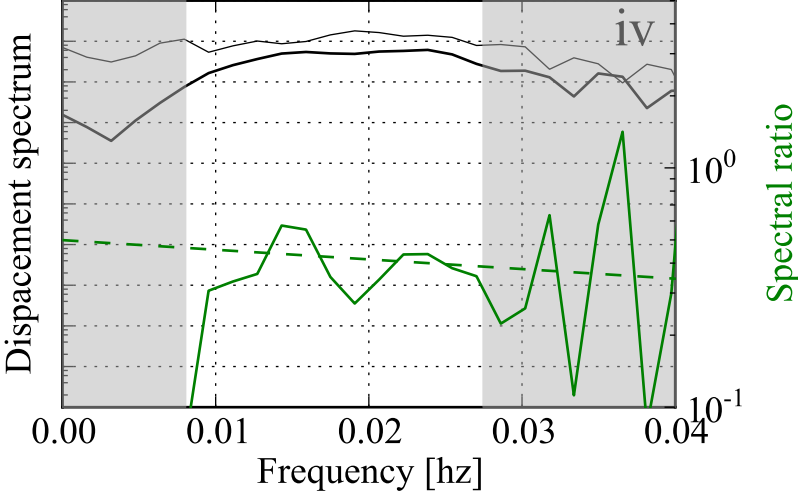



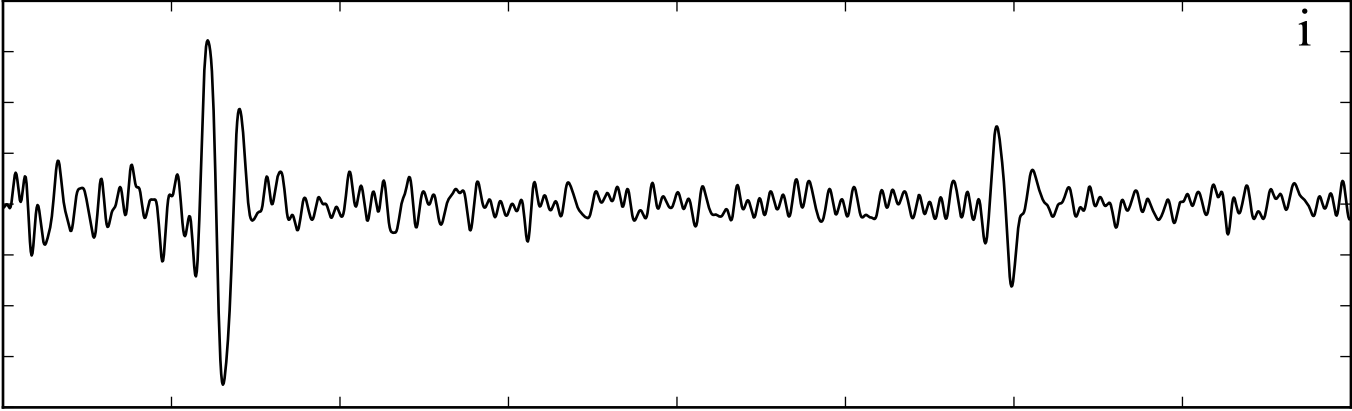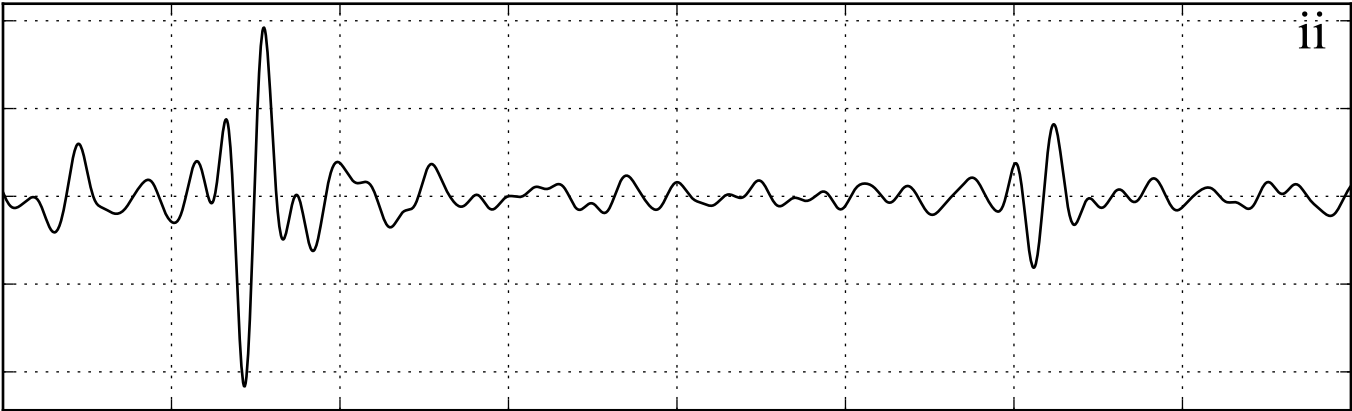

Time [s]

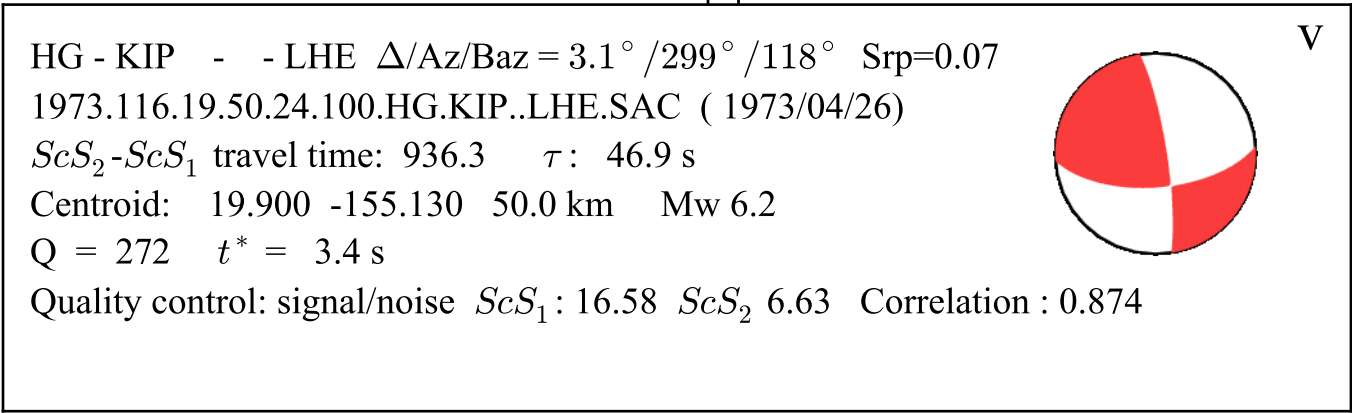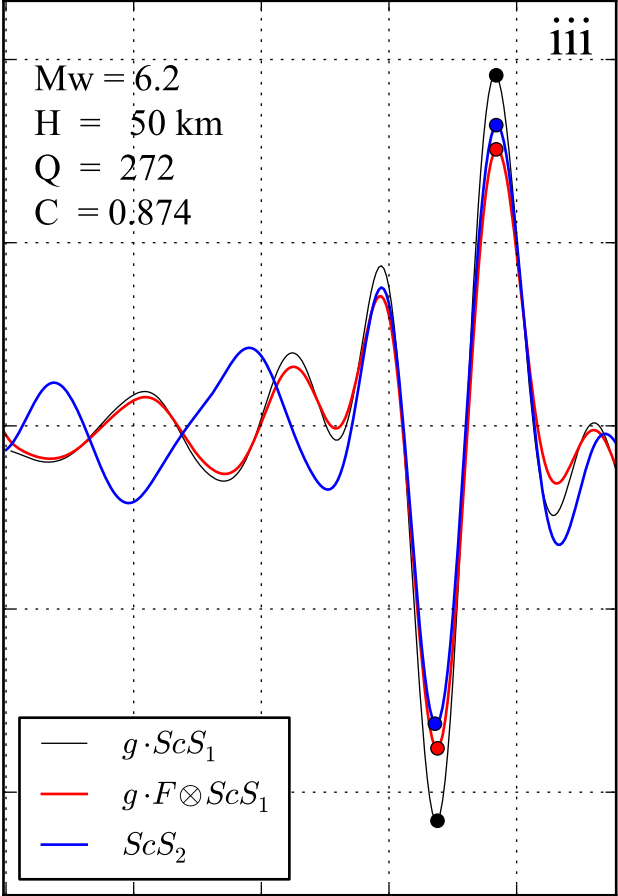

Time [s]

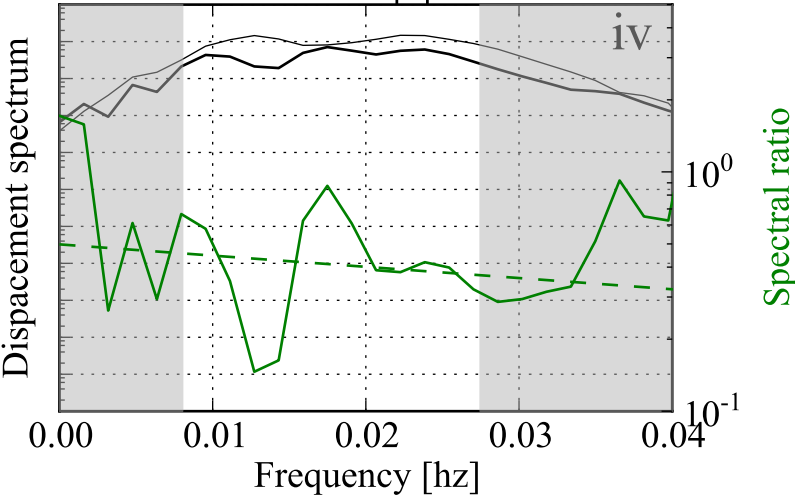

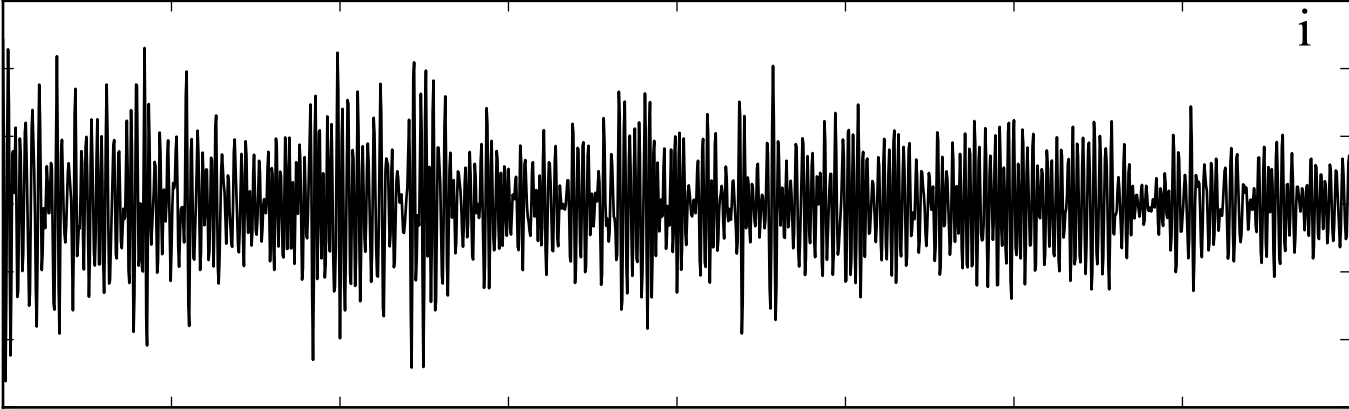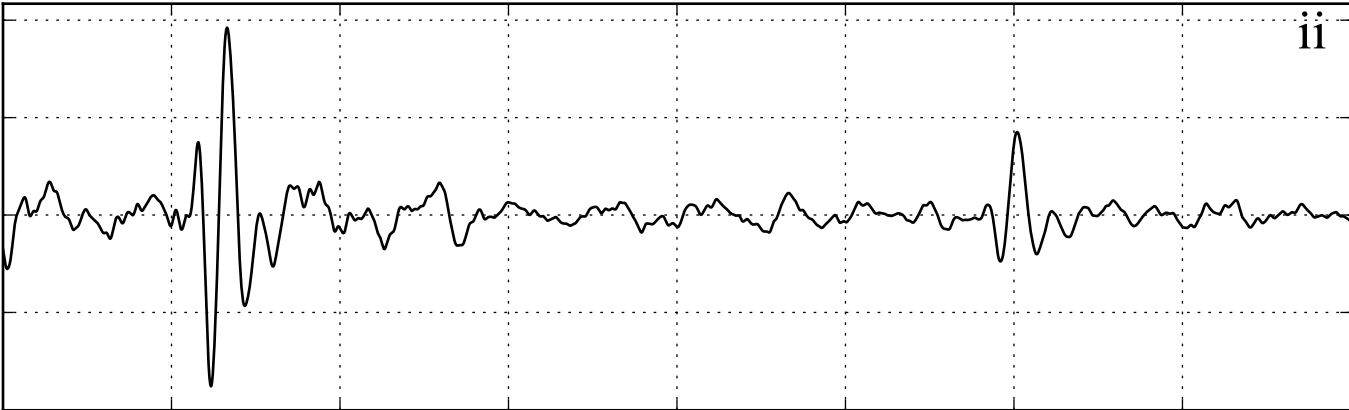

Time [s]

G - KIP - - LHN  $\Delta/Az/Baz = 3.4^\circ/305^\circ/124^\circ$   $Srp=0.97$   
1989.177.03.22.03.157.G.KIP..LHN.SAC ( 1989/06/26)  
 $ScS_2$ - $ScS_1$  travel time: 937.2  $\tau$ : 39.7 s  
Centroid: 19.470 -155.060 15.0 km Mw 6.4  
 $Q = 228$   $t^* = 4.1$  s  
Quality control: signal/noise  $ScS_1$ : 14.44  $ScS_2$  5.21 Correlation : 0.913

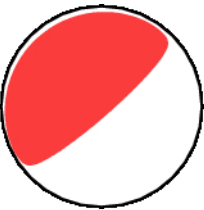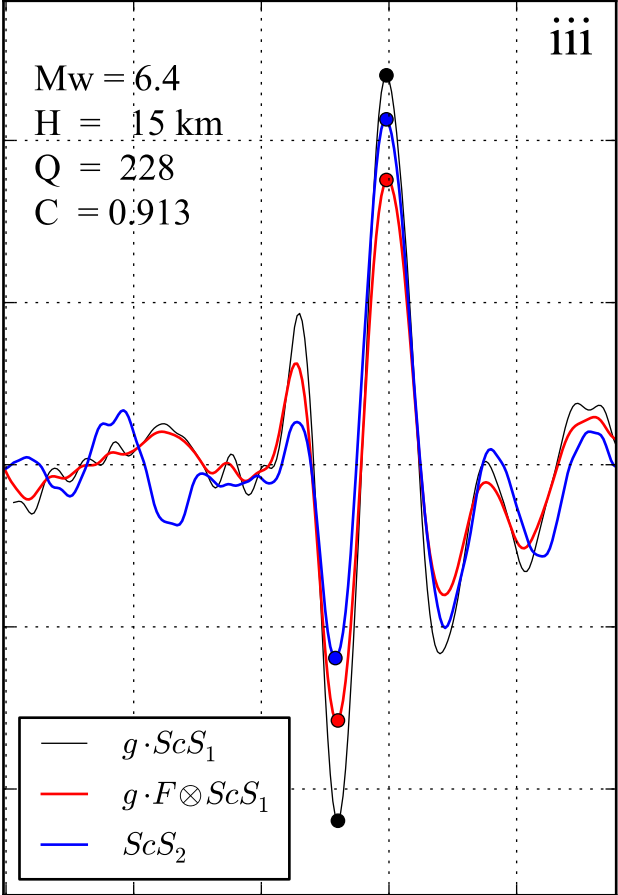

Time [s]

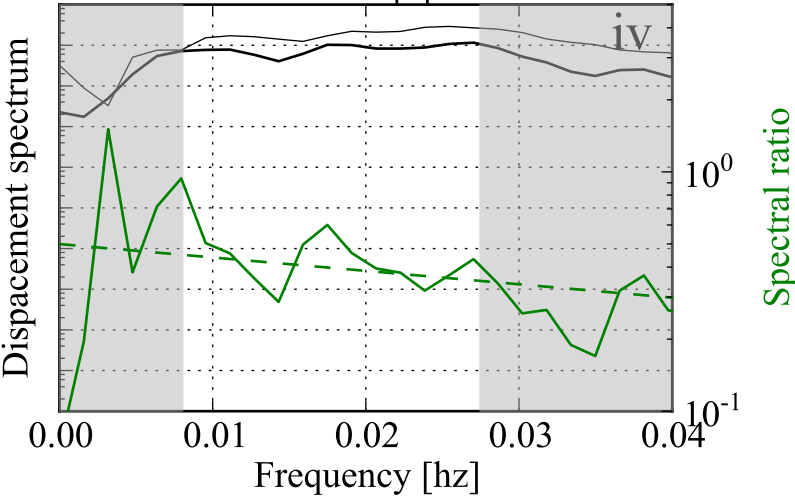

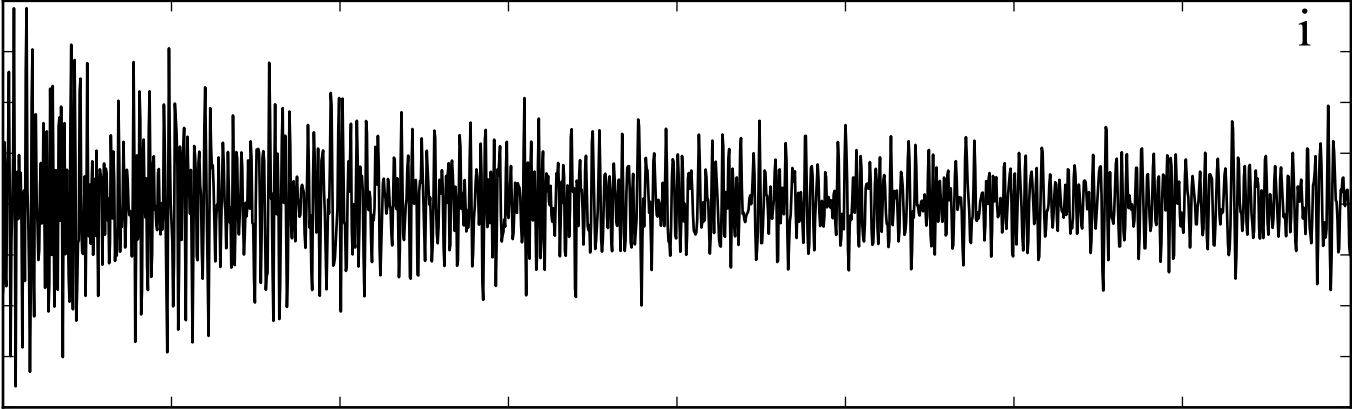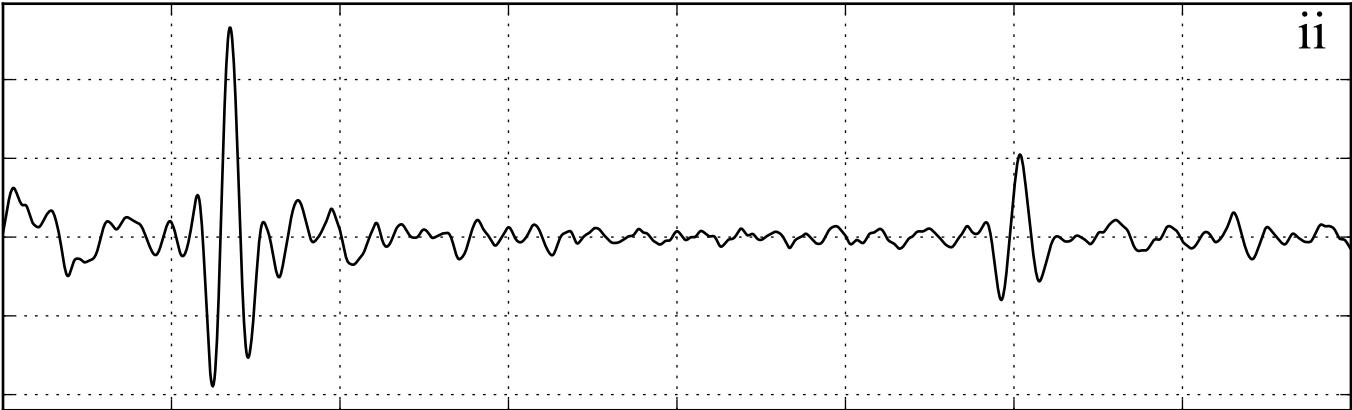

Time [s]

G - KIP - 00 - LHE  $\Delta/Az/Baz = 2.5^\circ/309^\circ/128^\circ$   $Srp=0.56$   
2006.288.17.02.49.048.G.KIP.00.LHE.SAC ( 2006/10/15)  
 $ScS_2-ScS_1$  travel time: 936.4  $\tau$ : 43.9 s  
Centroid: 19.830 -155.940 48.0 km Mw 6.7  
 $Q = 304$   $t^* = 3.1$  s  
Quality control: signal/noise  $ScS_1$ : 24.07  $ScS_2$  9.77 Correlation : 0.947

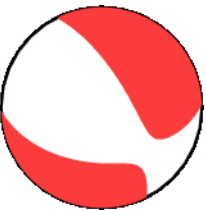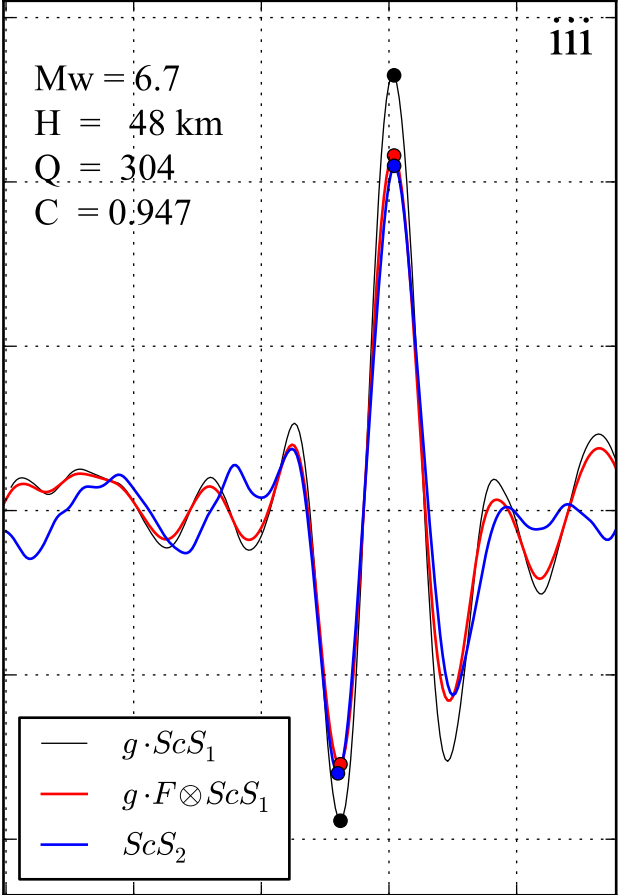

Time [s]

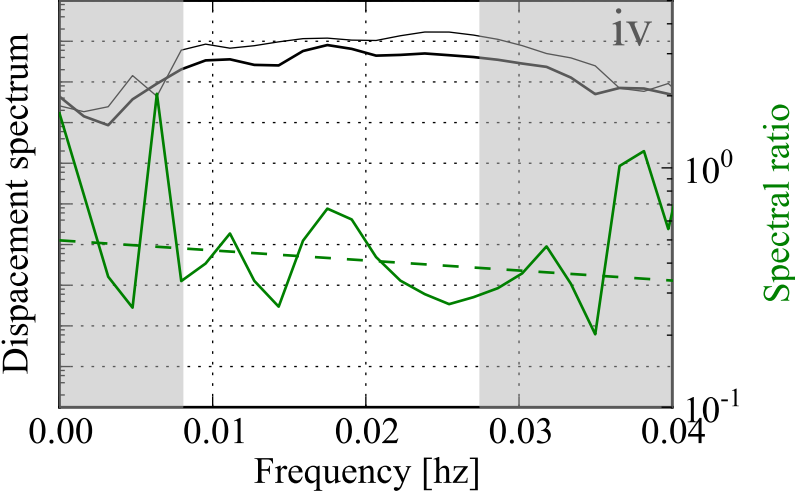

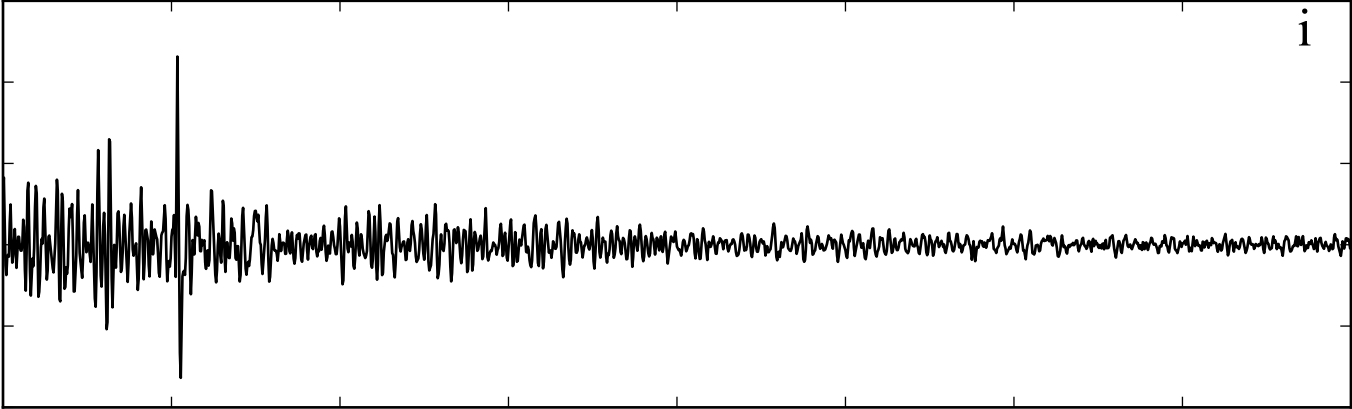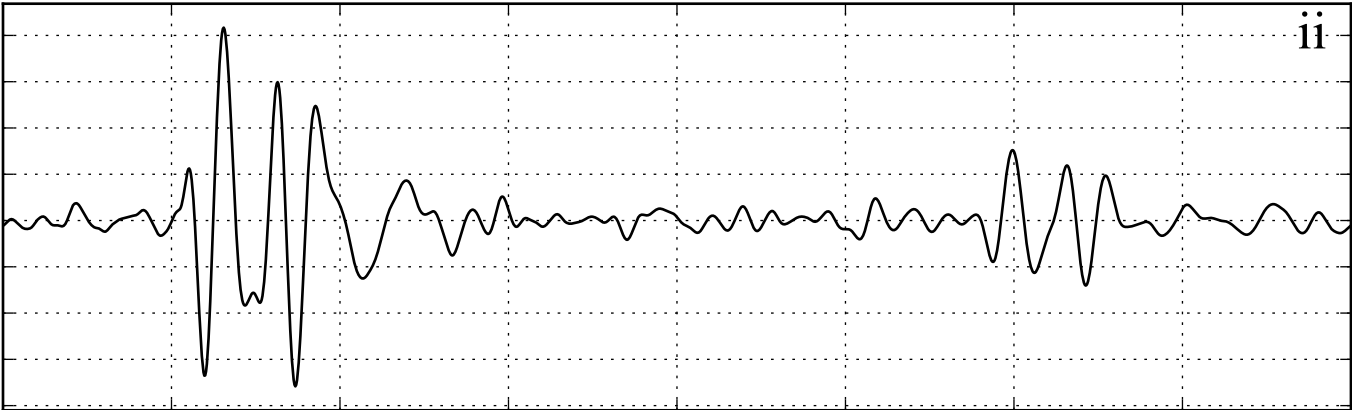

Time [s]

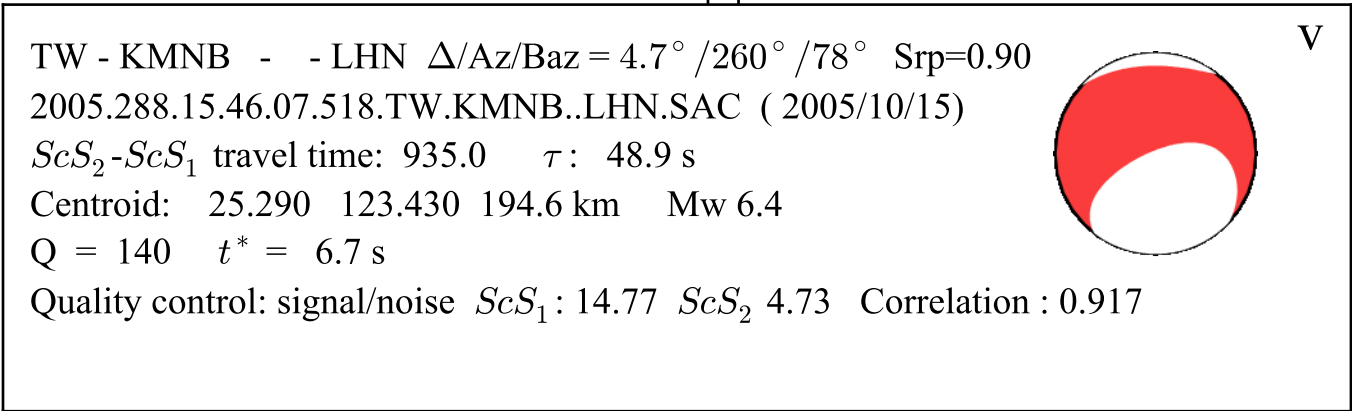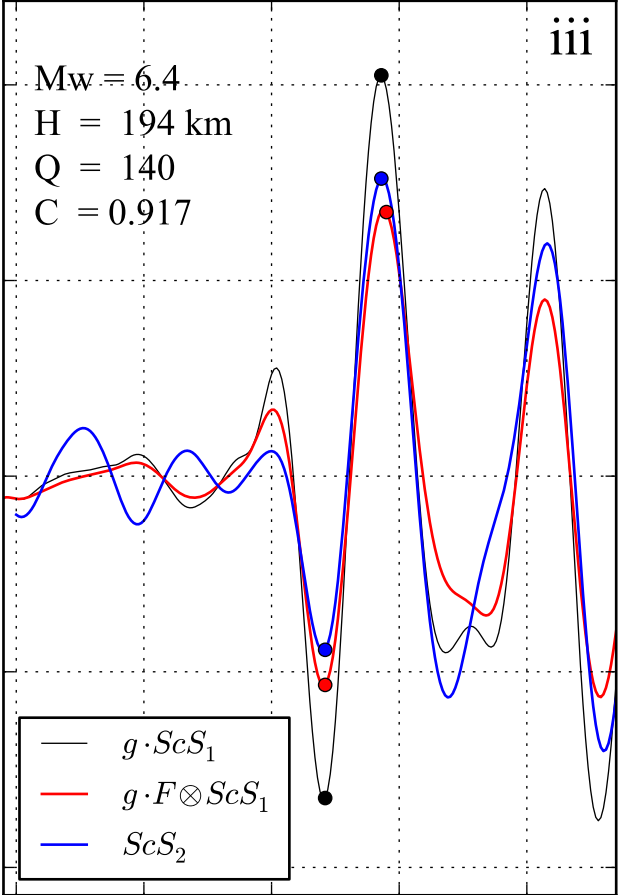

Time [s]

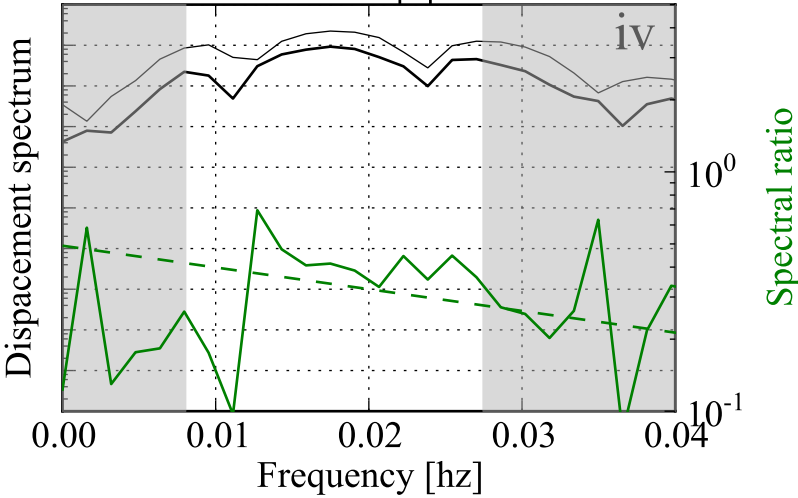

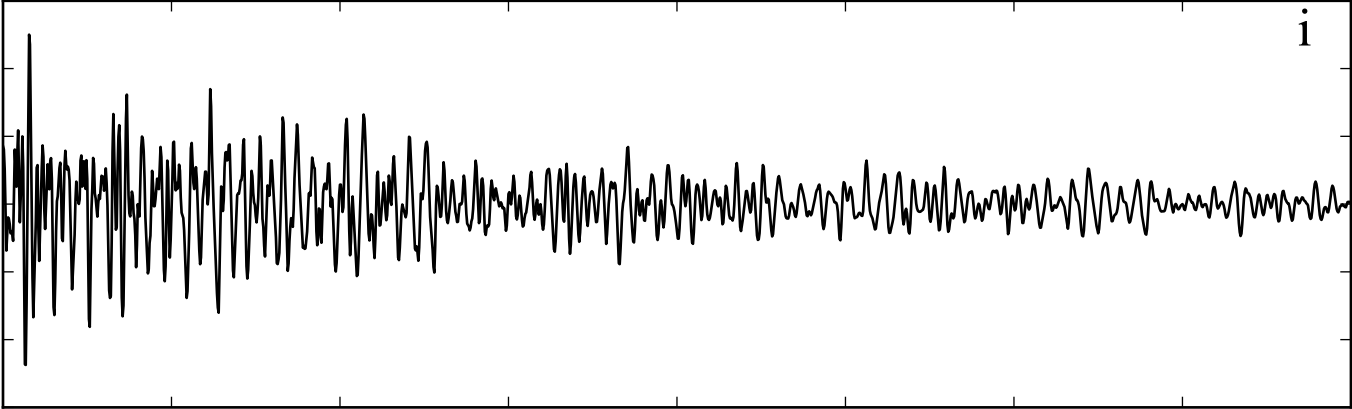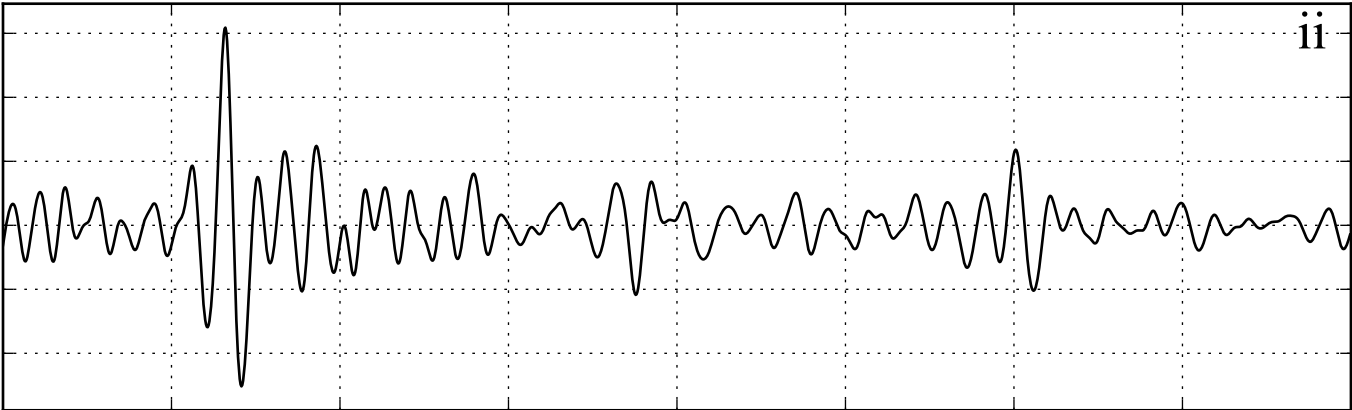

Time [s]

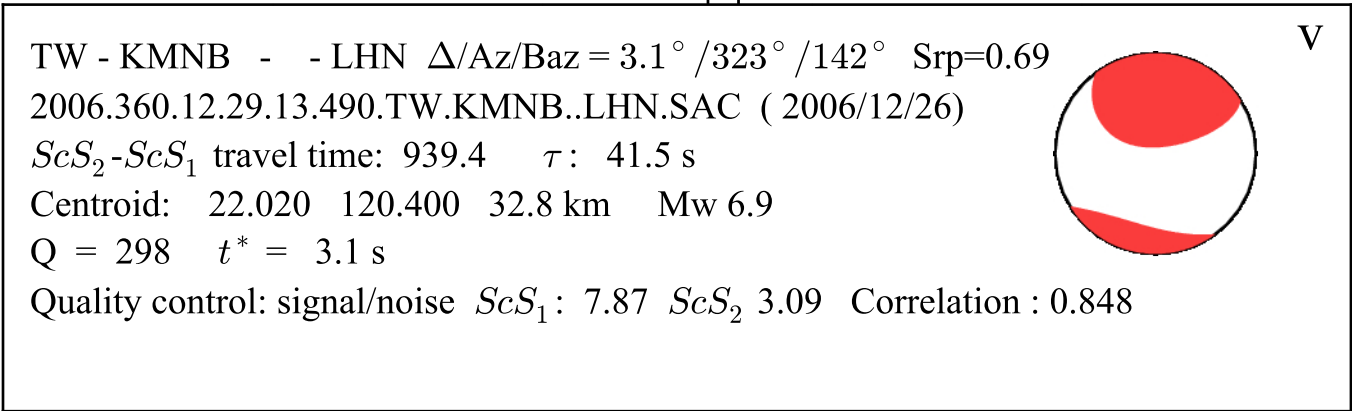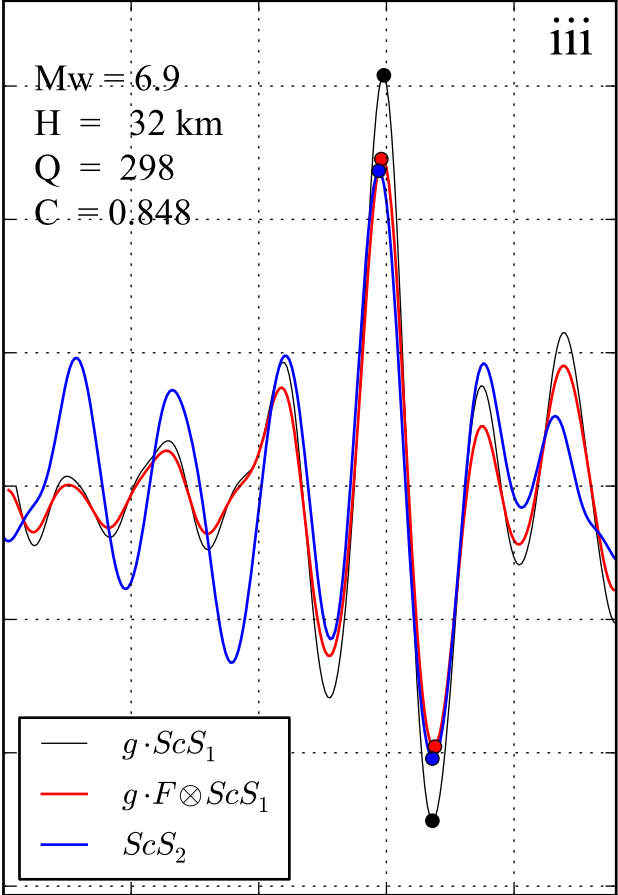

Time [s]

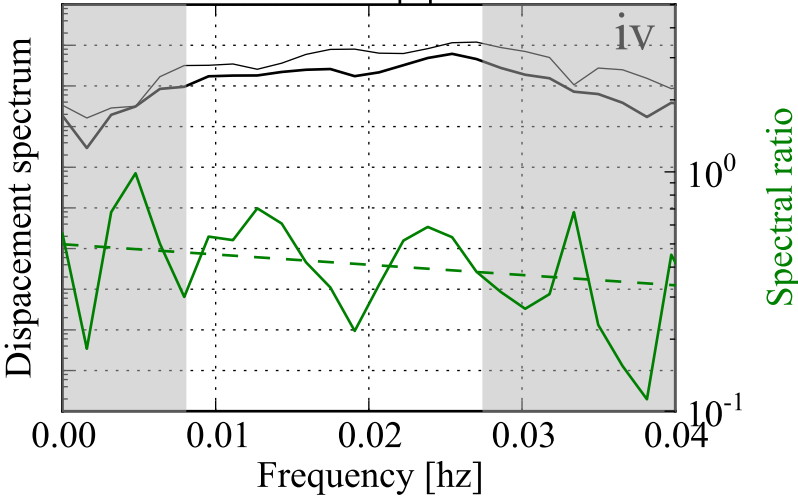

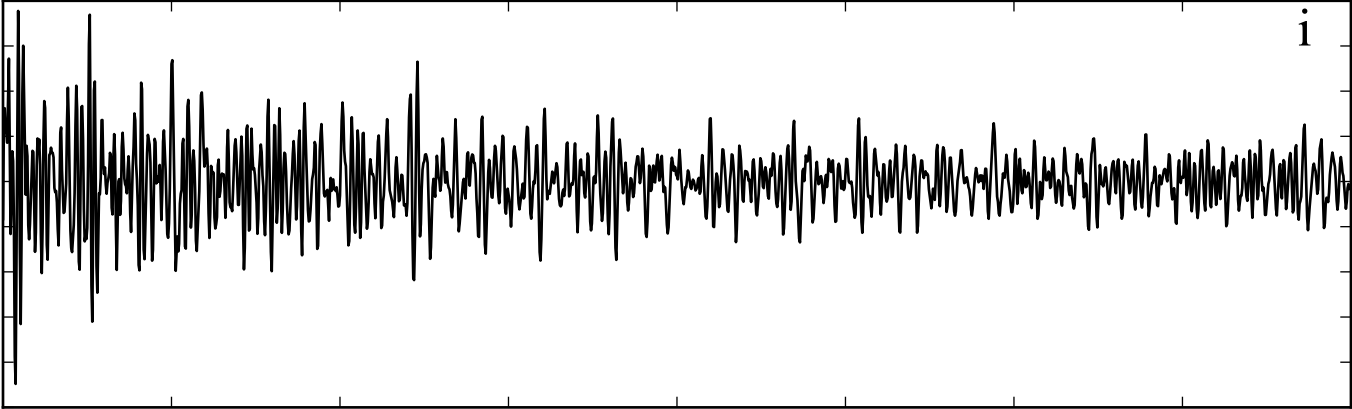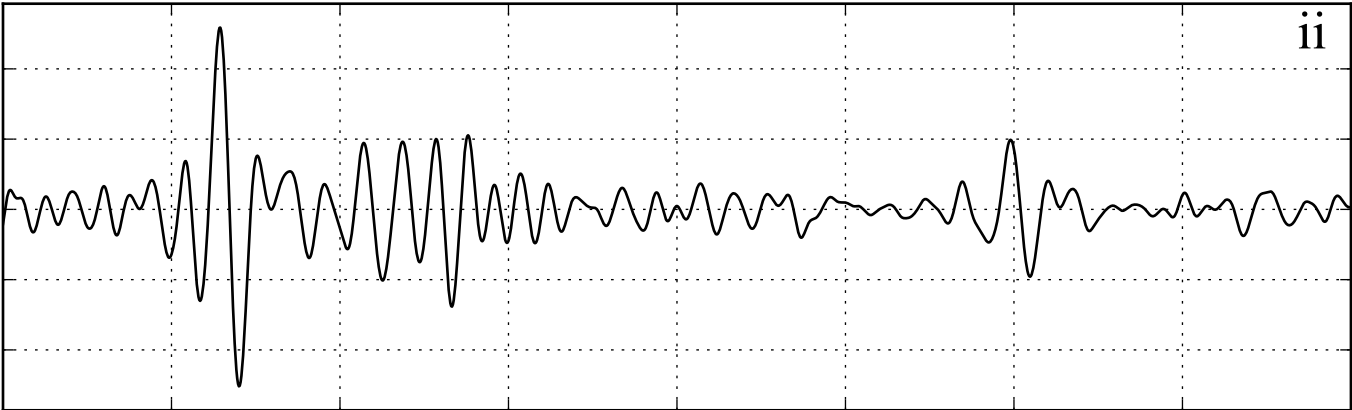

Time [s]

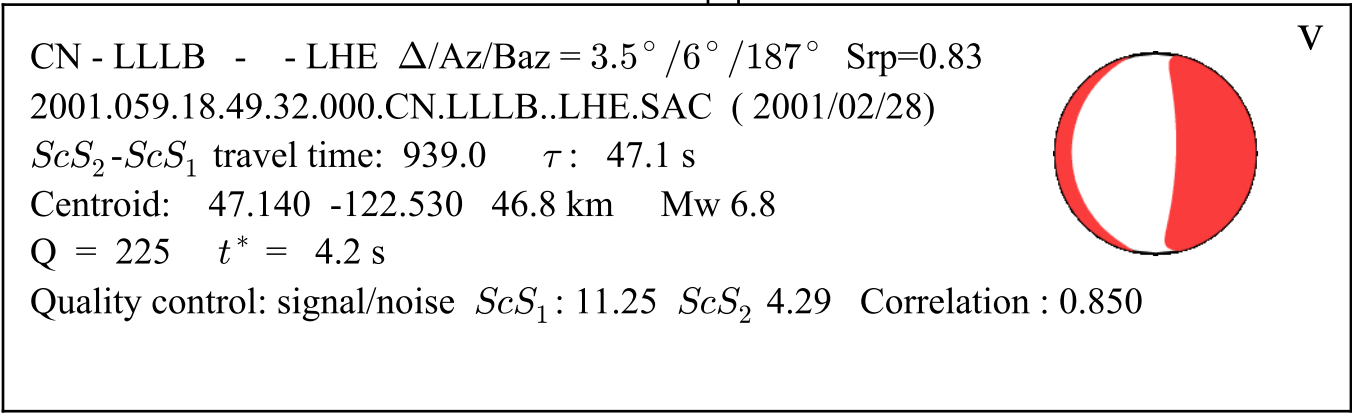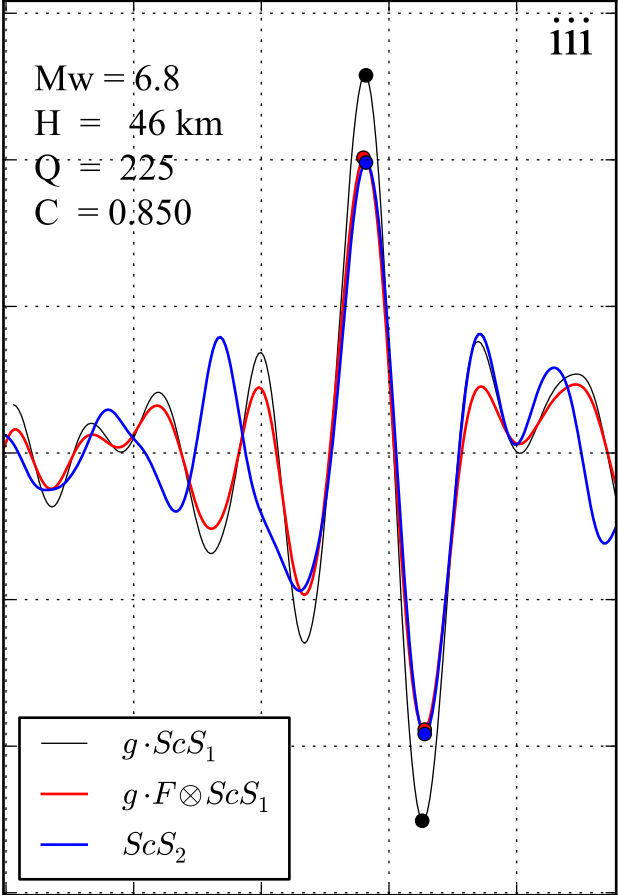

Time [s]

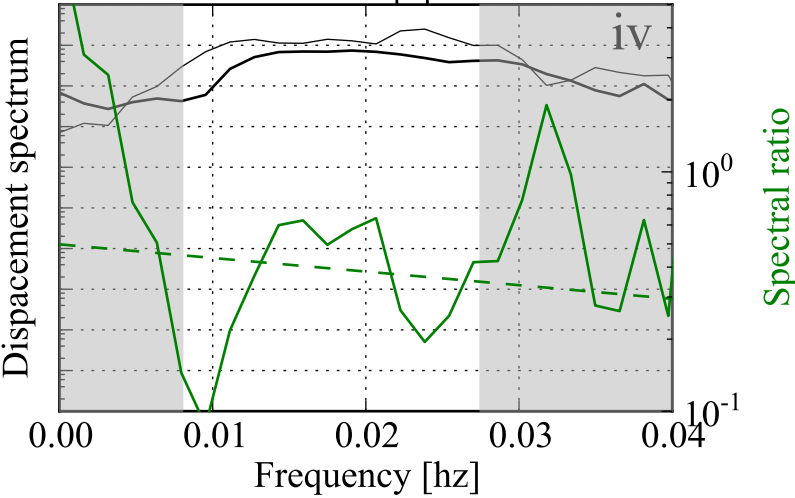

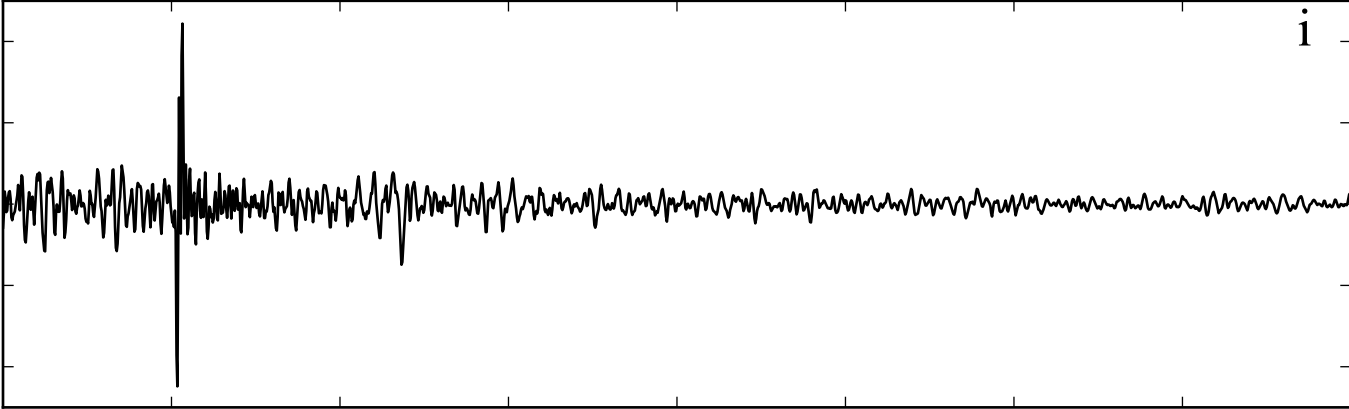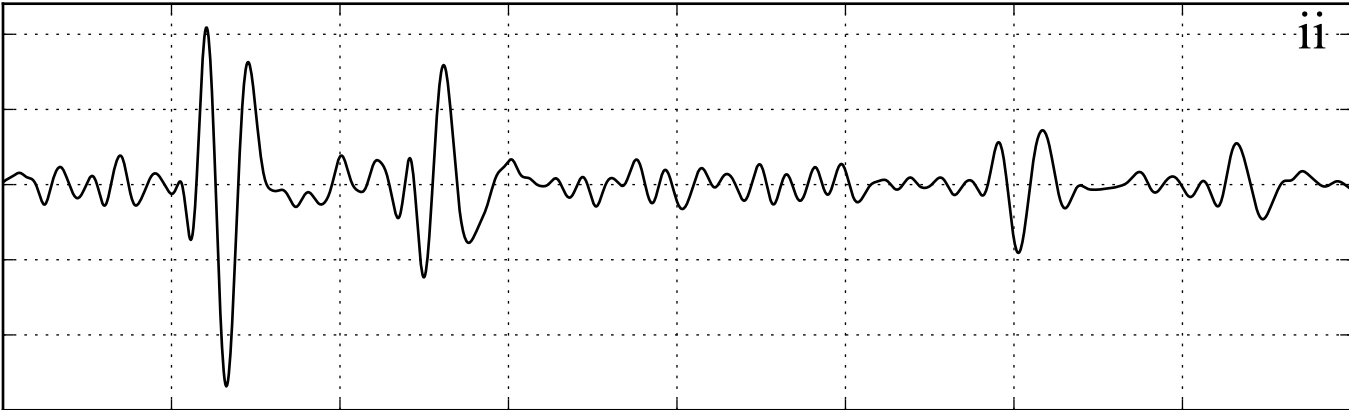

Time [s]

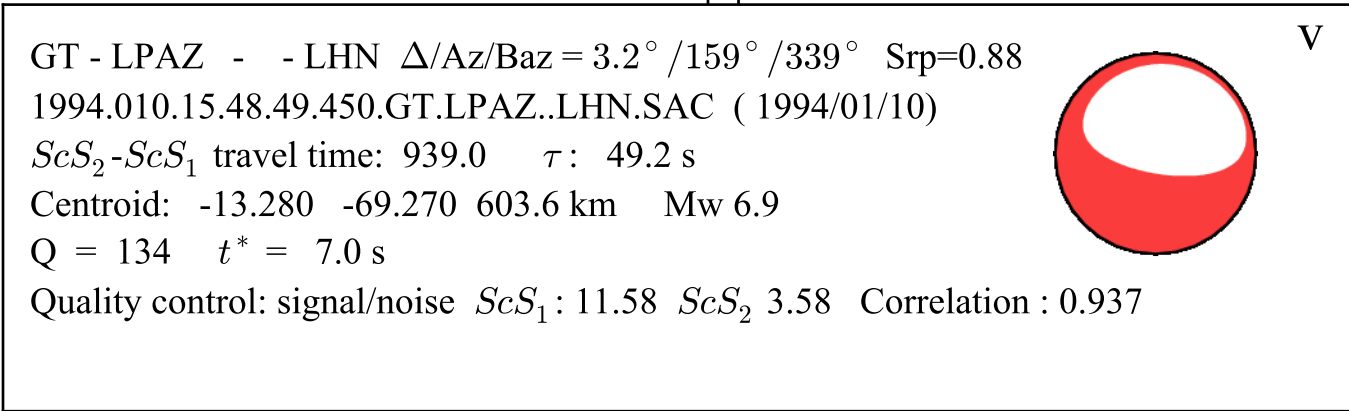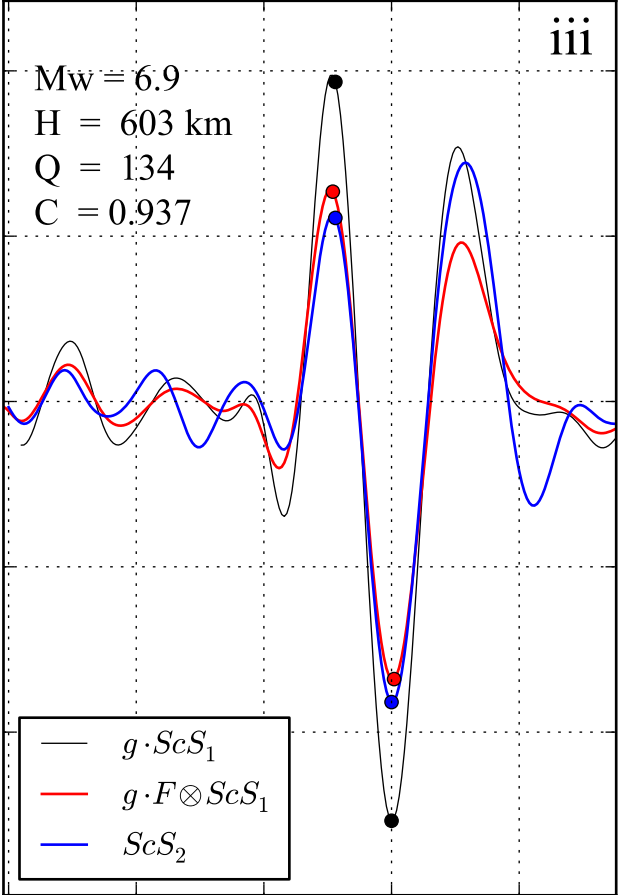

Time [s]

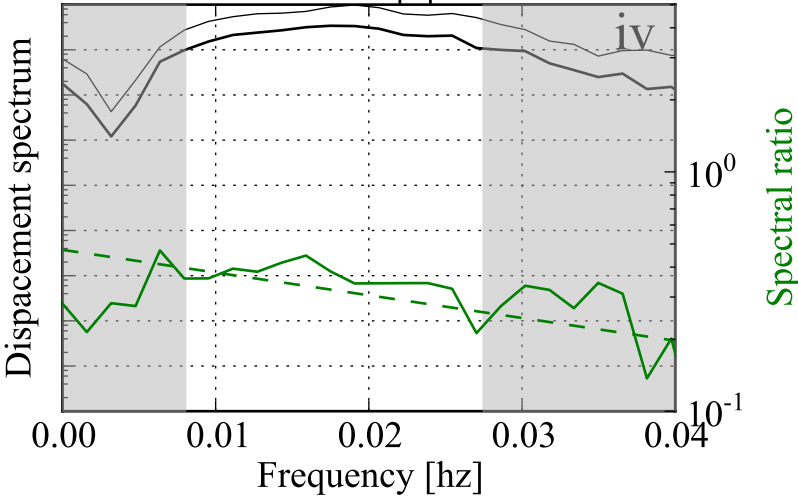

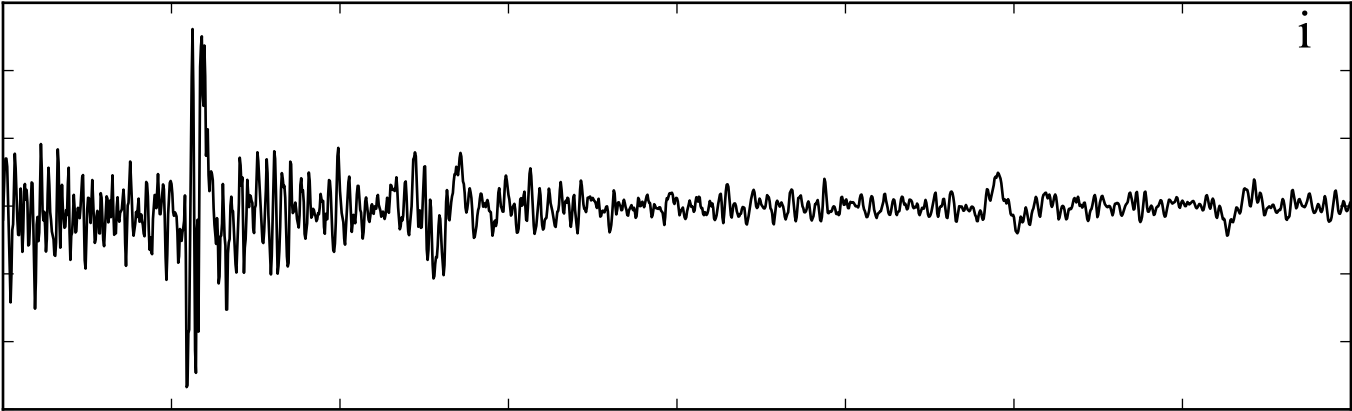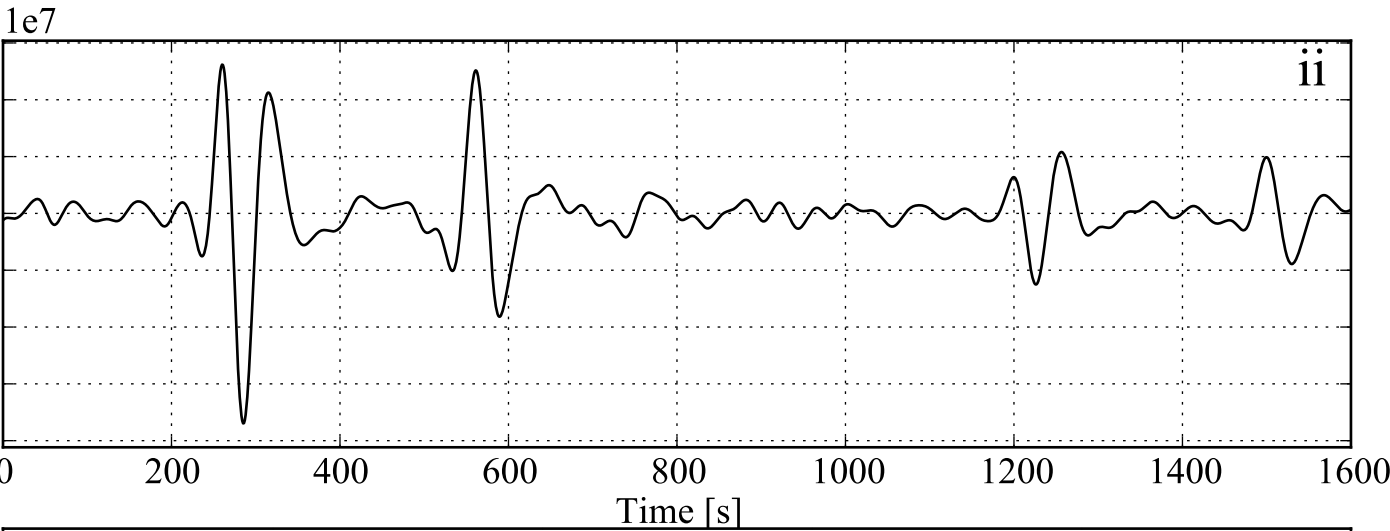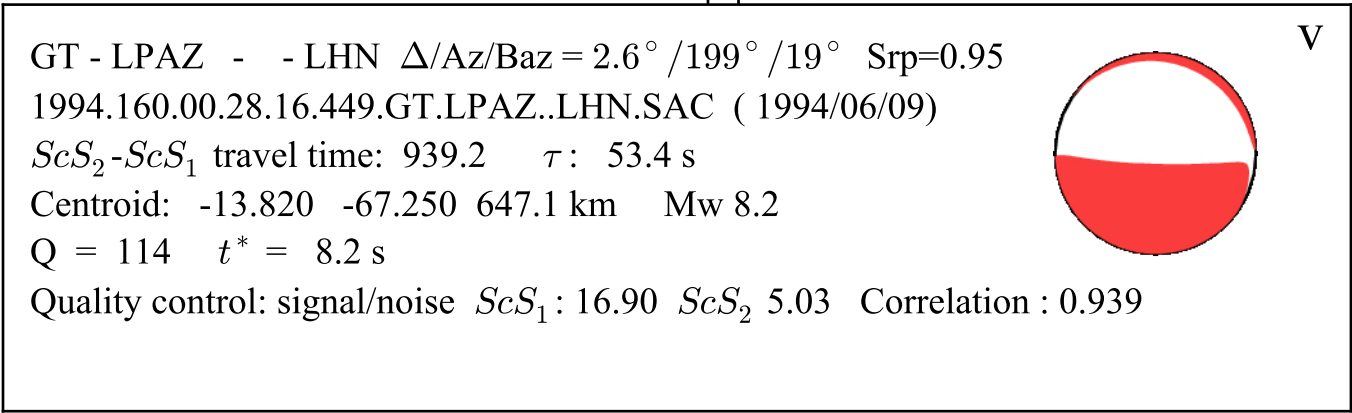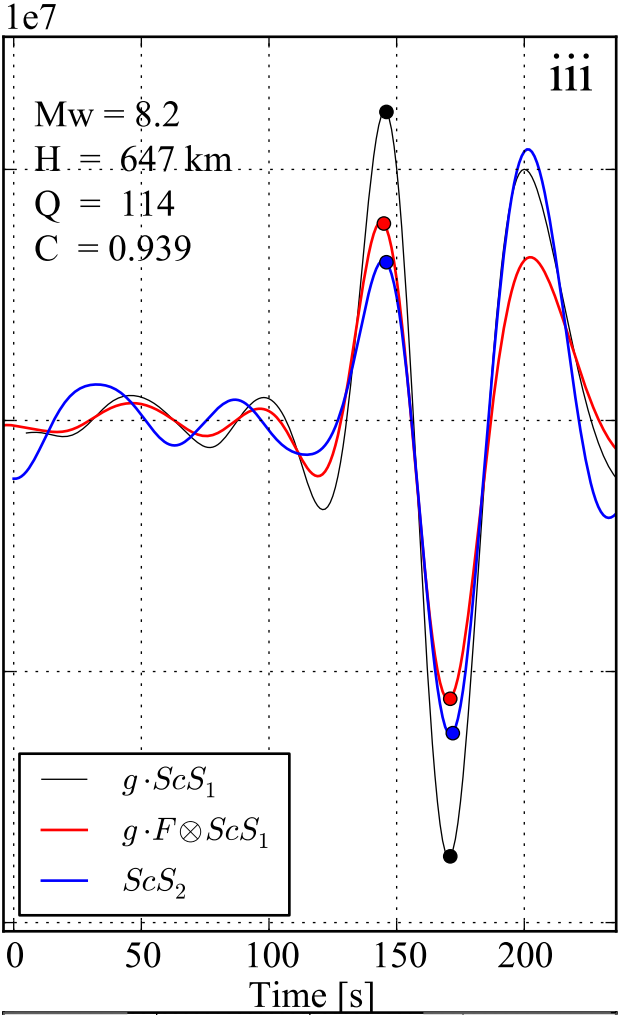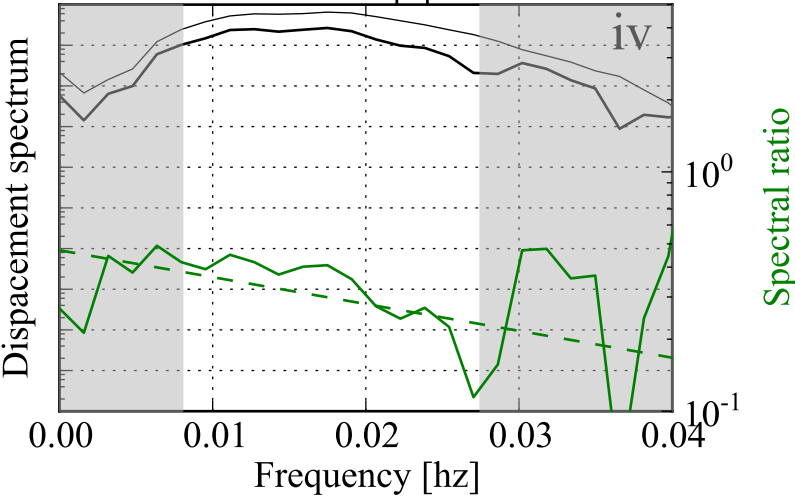



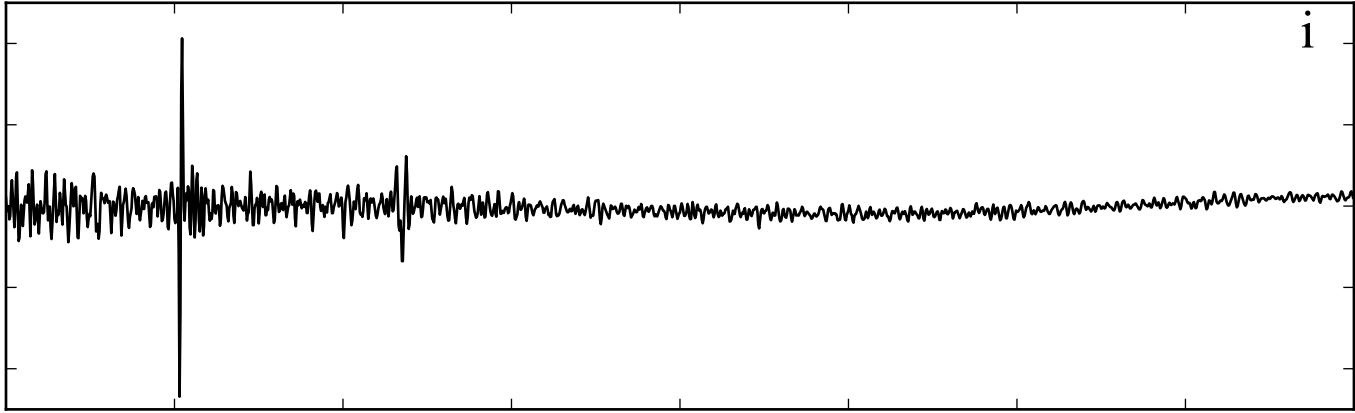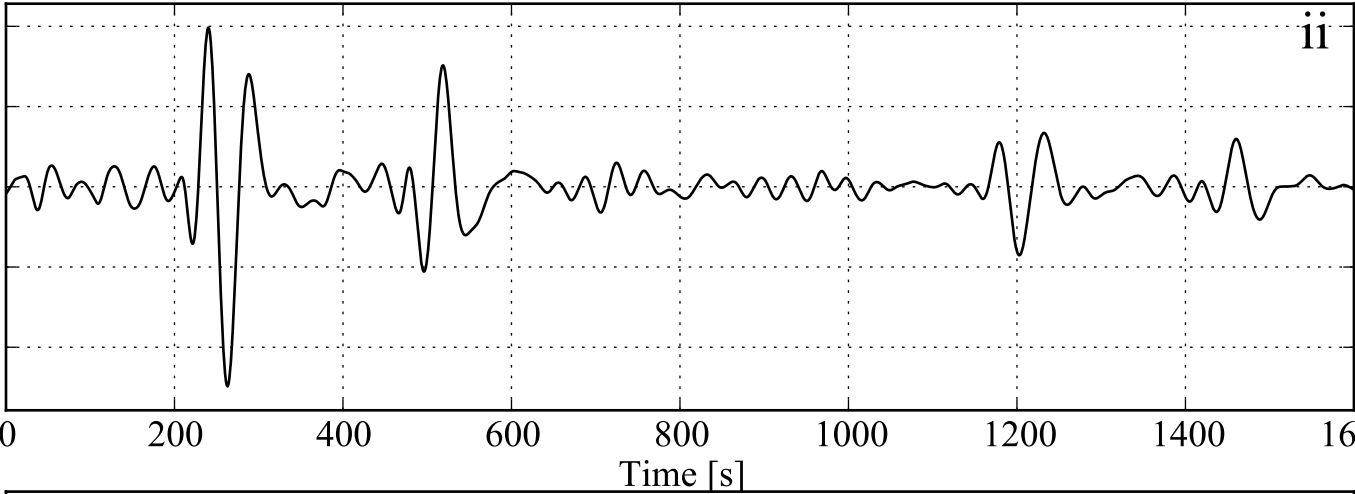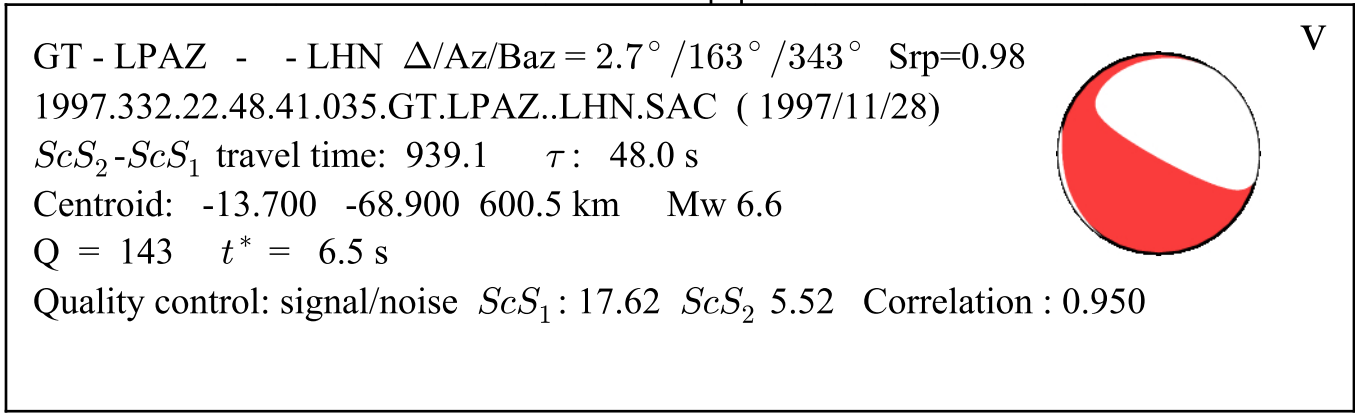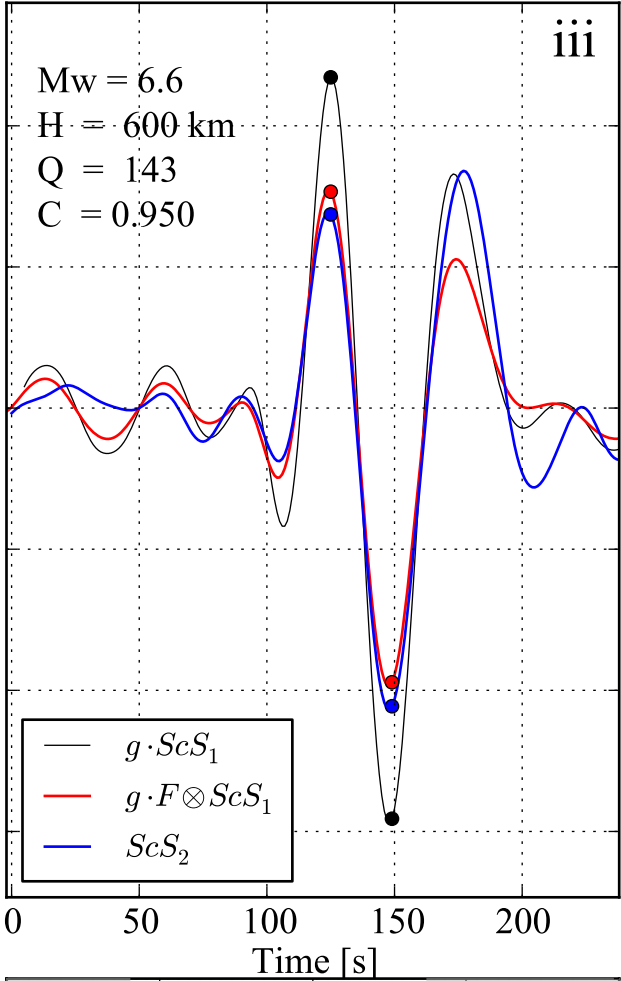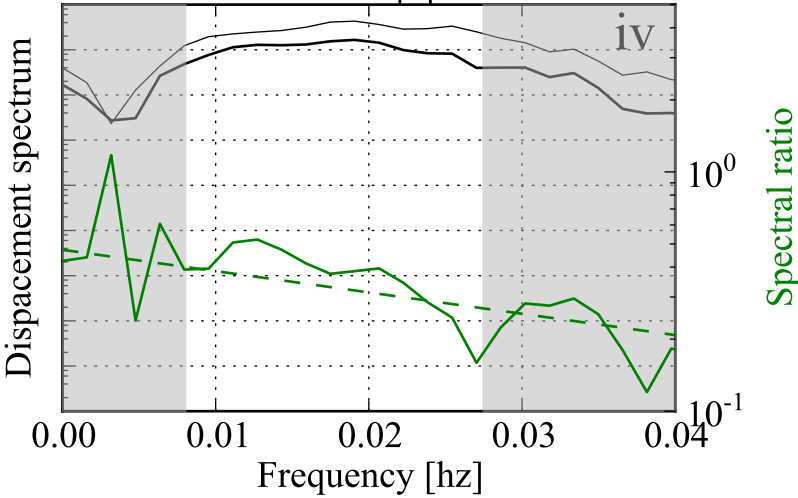

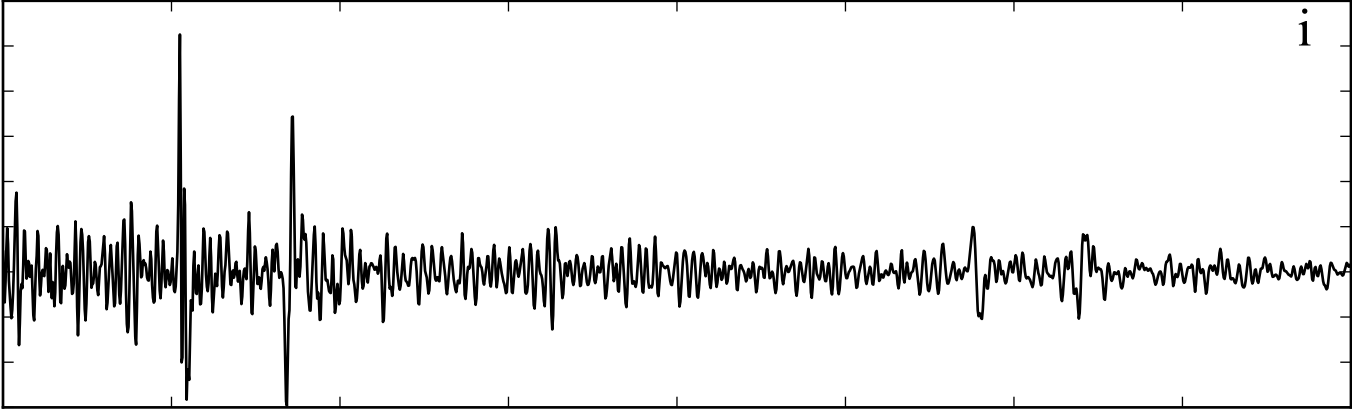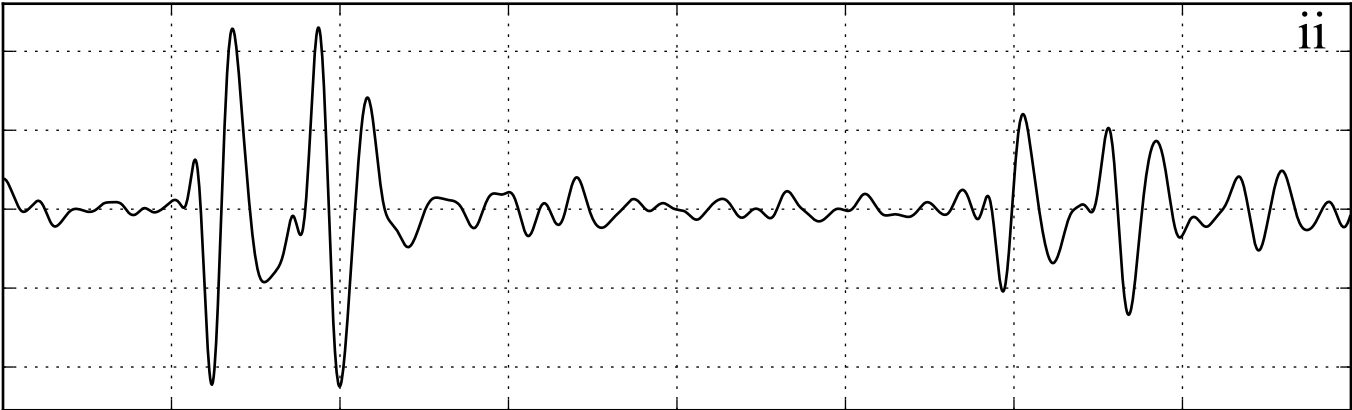

Time [s]

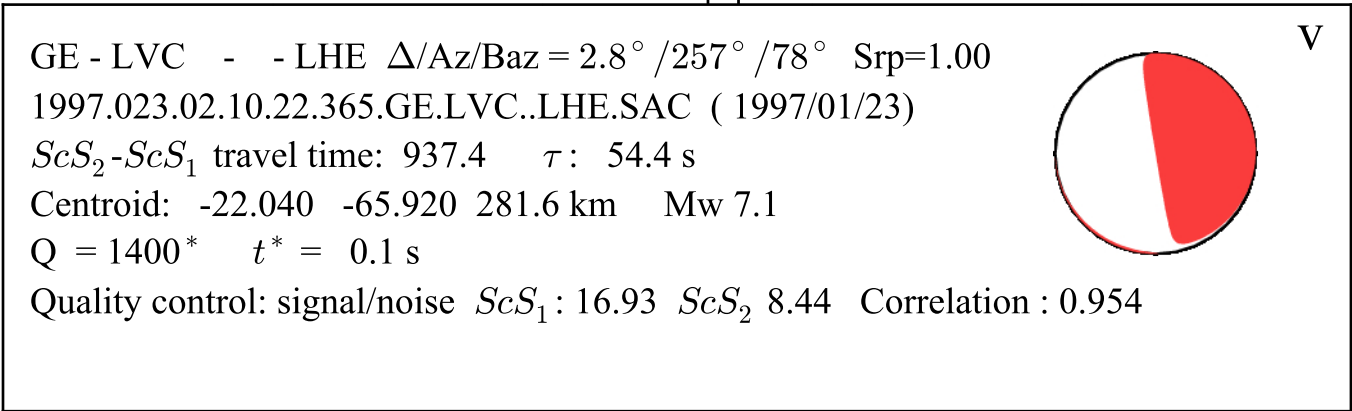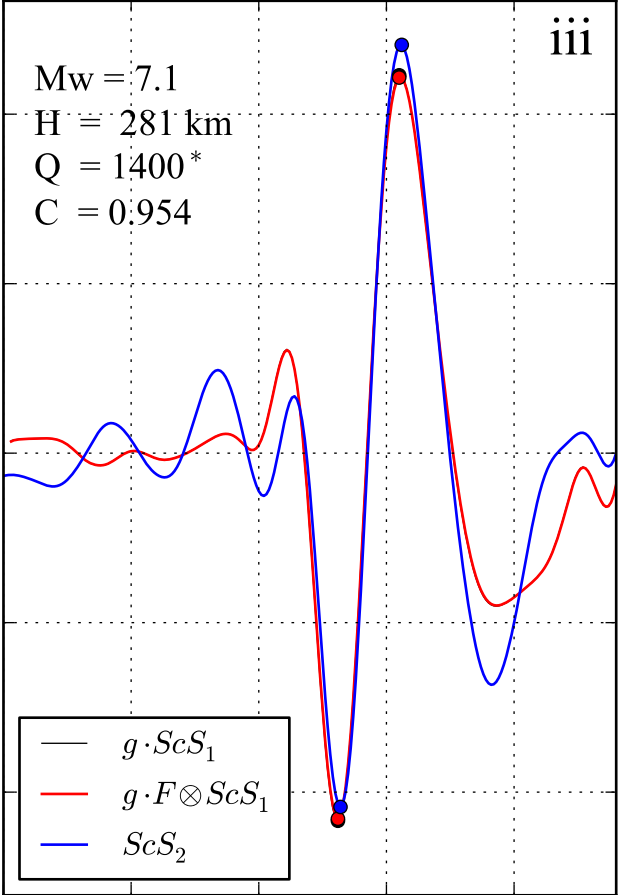

Time [s]

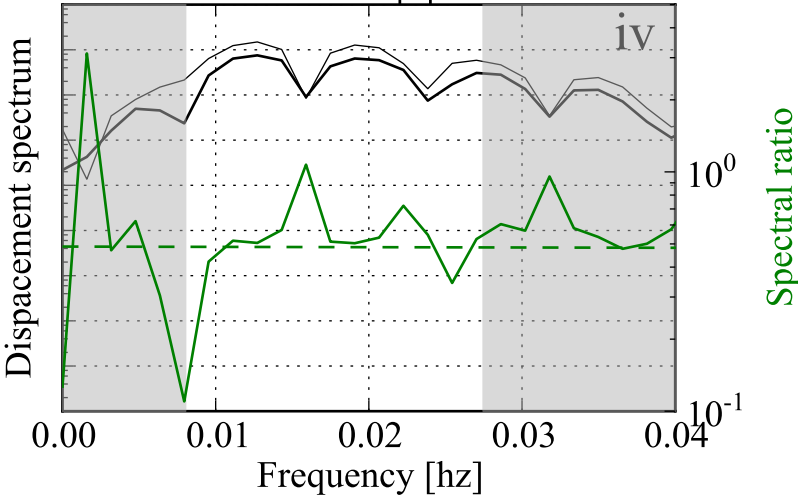

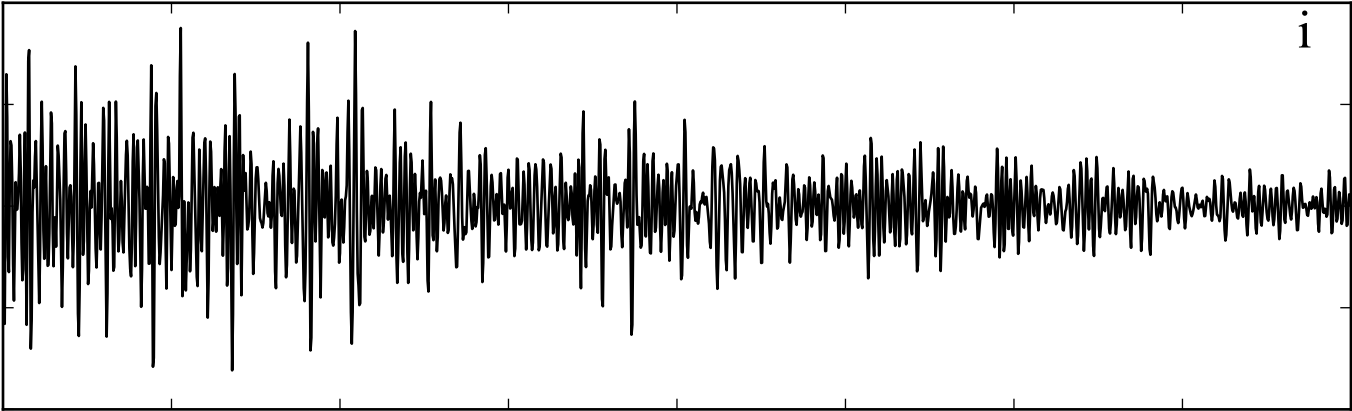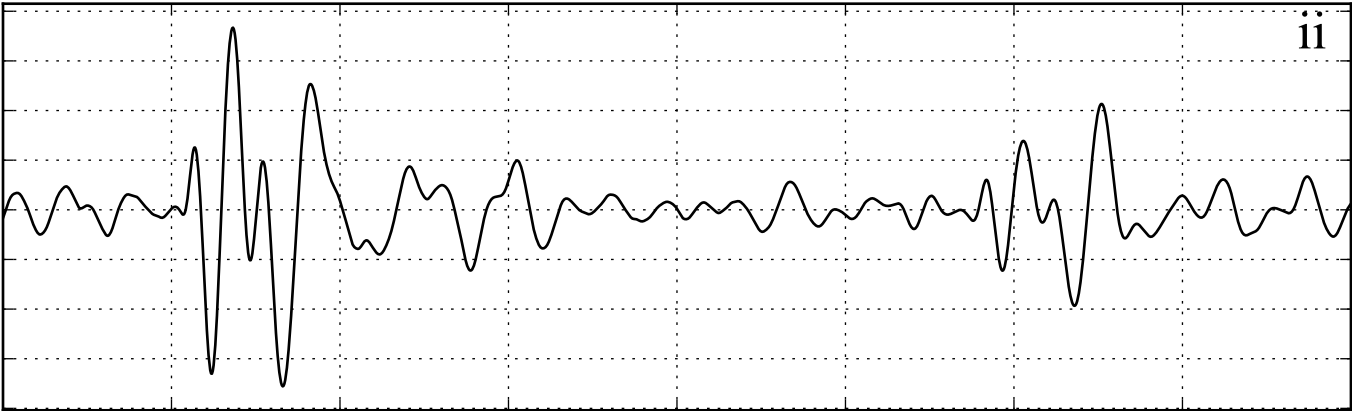

Time [s]

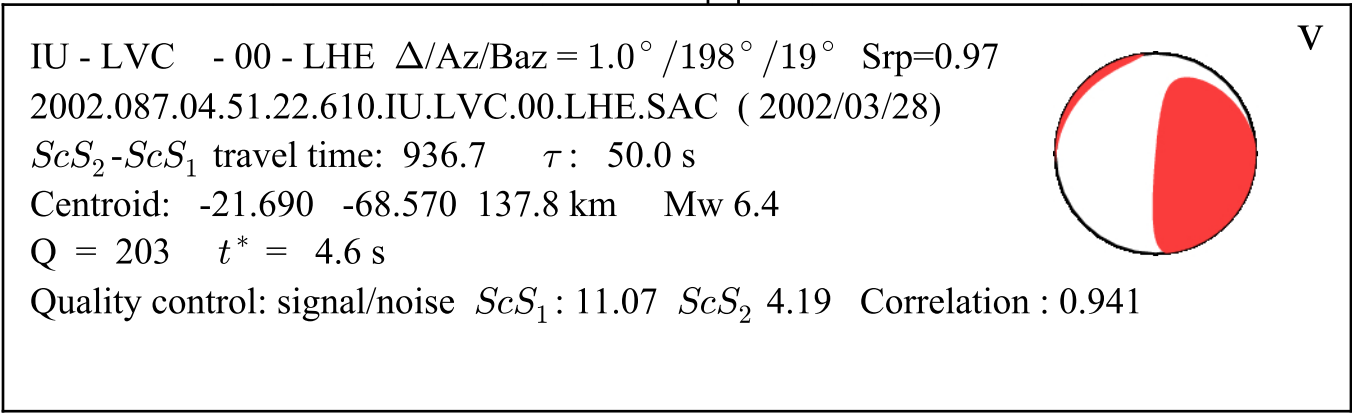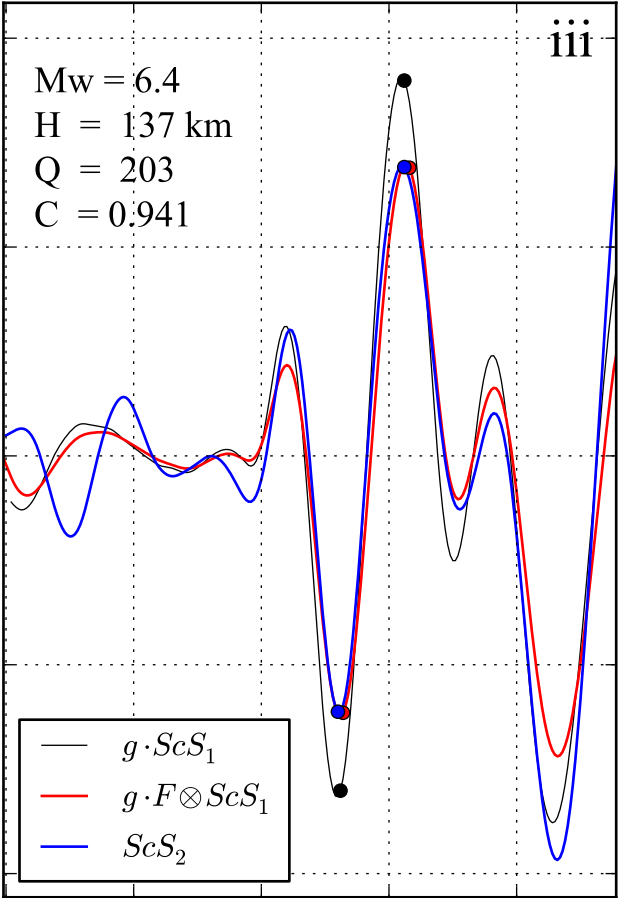

Time [s]

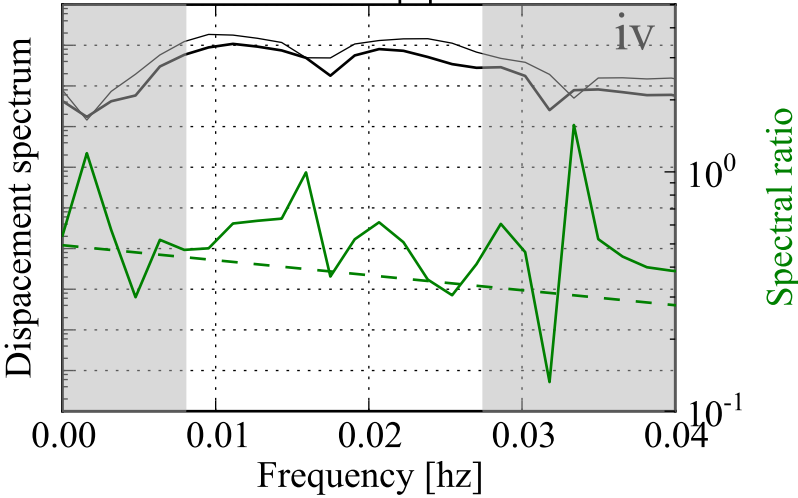

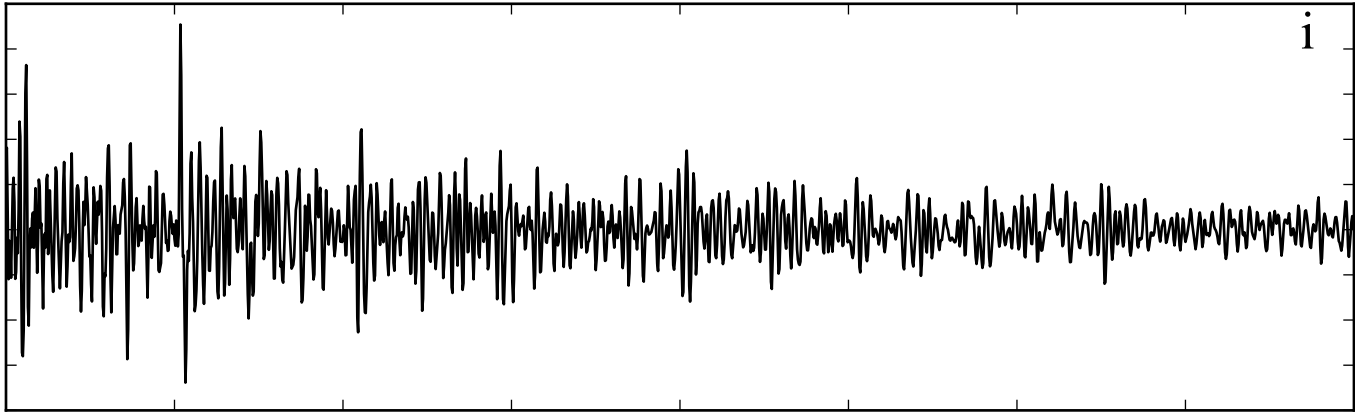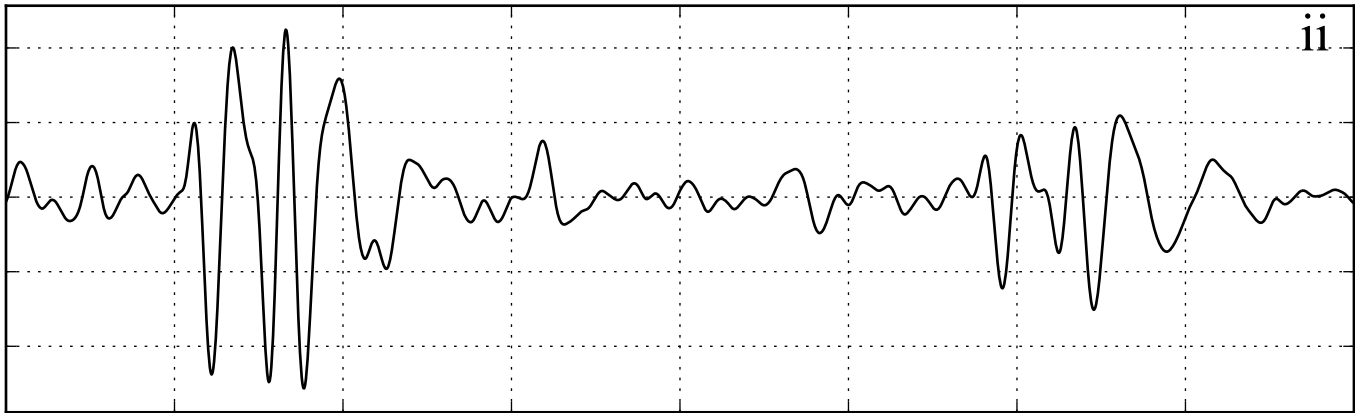

Time [s]

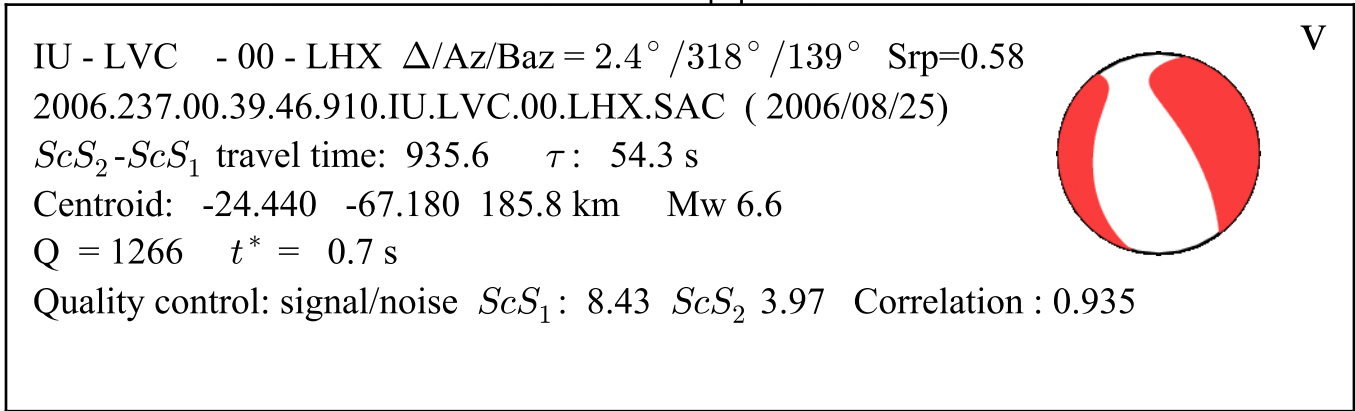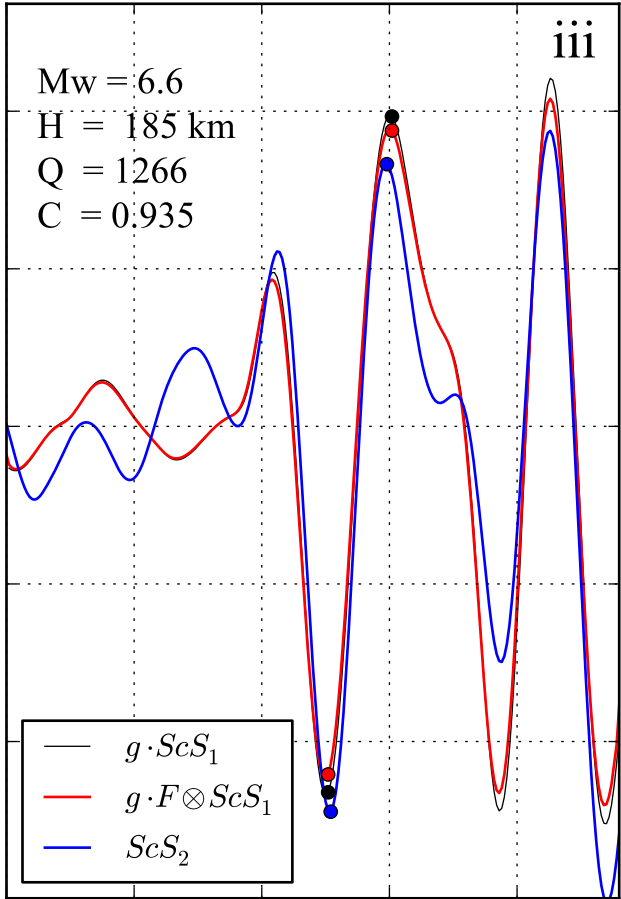

Time [s]

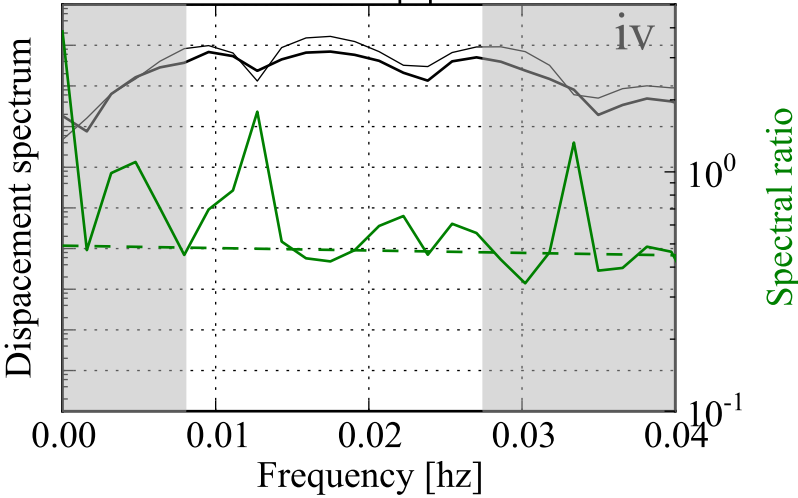

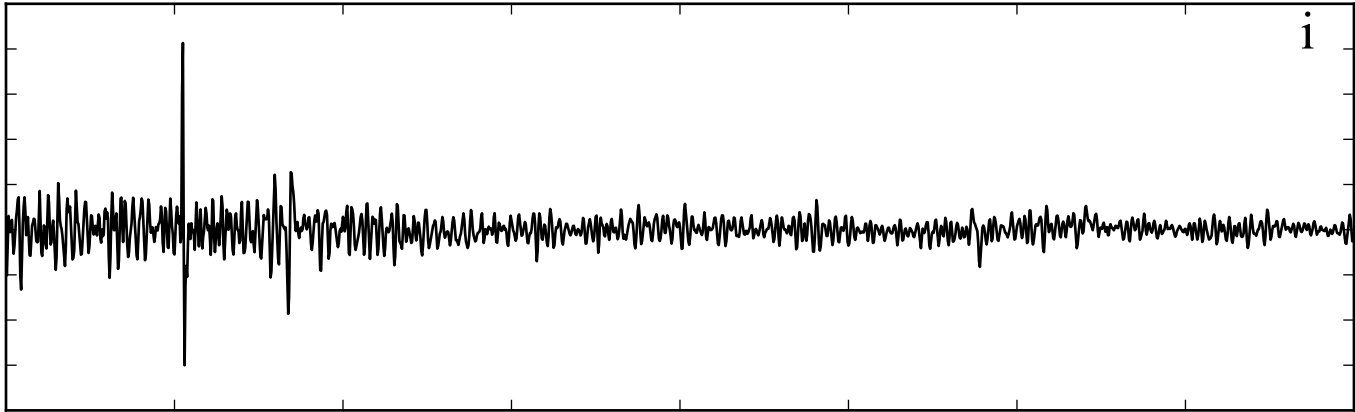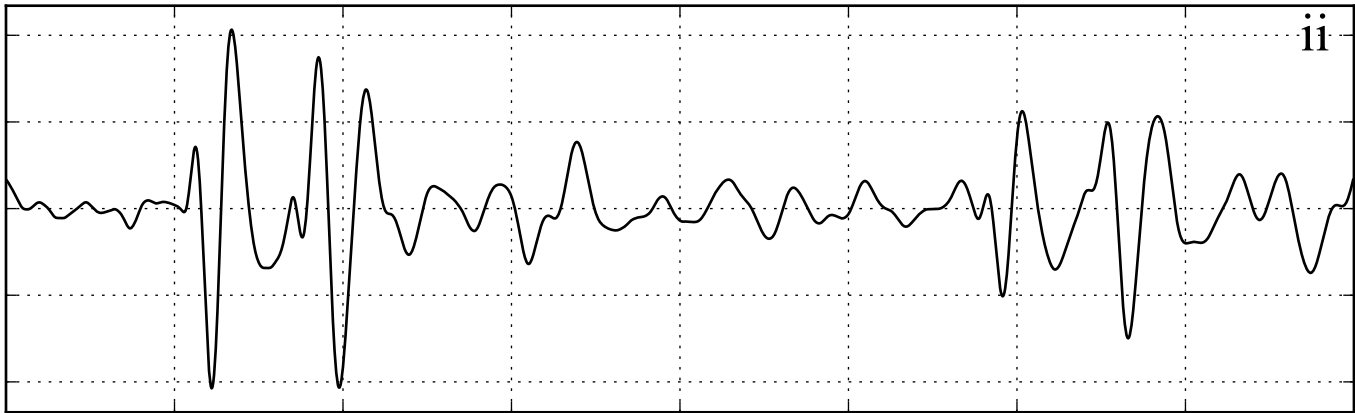

Time [s]

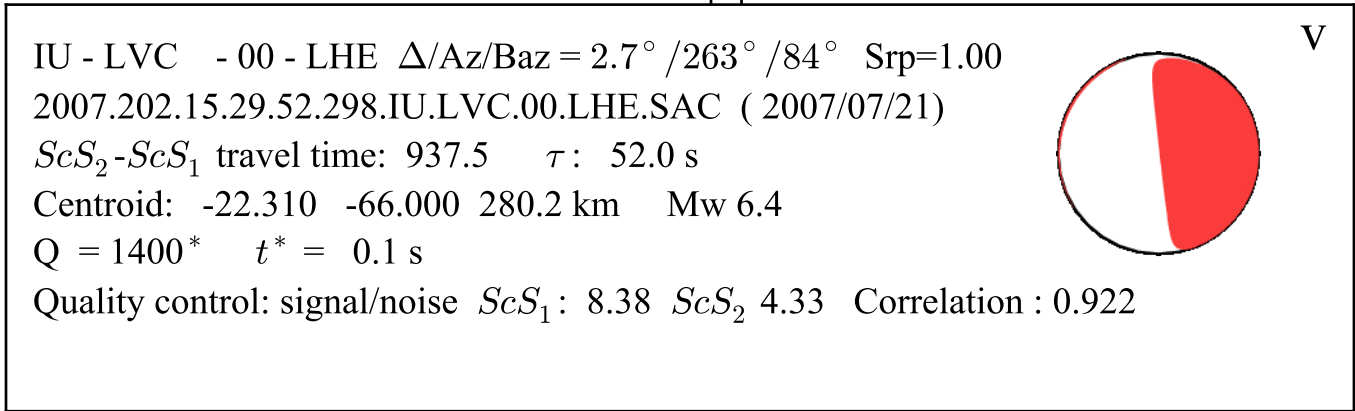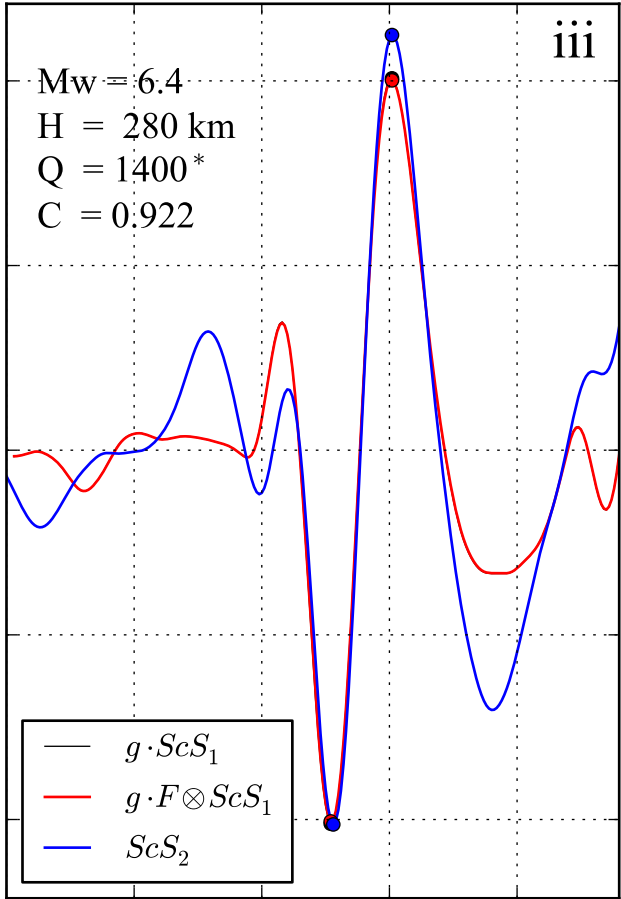

Time [s]

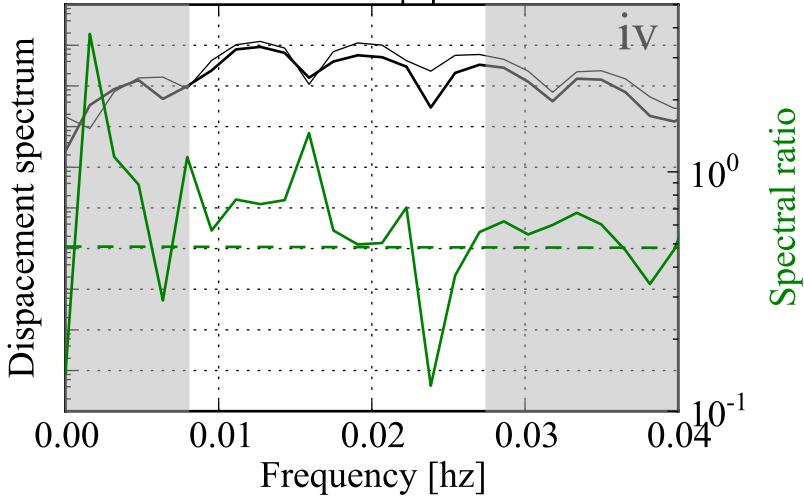

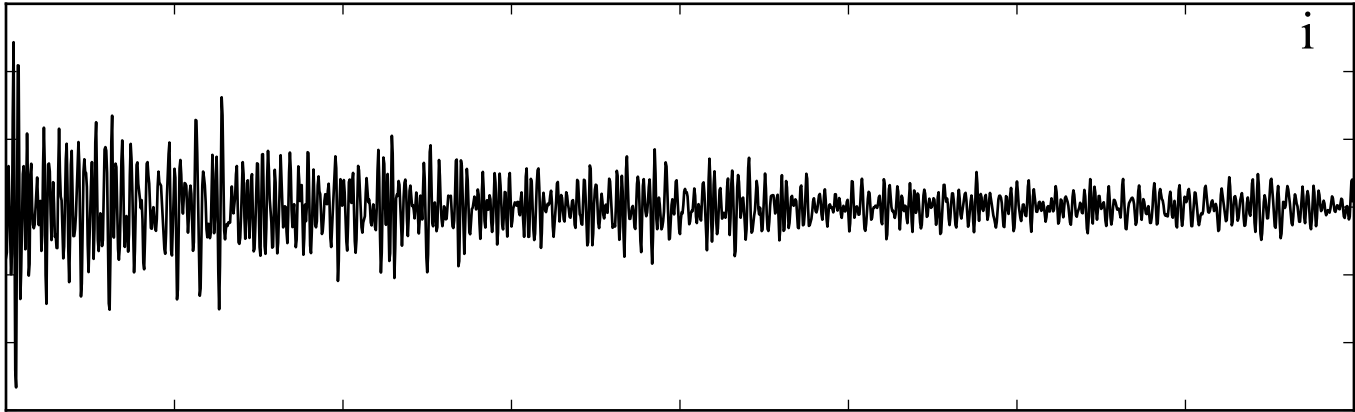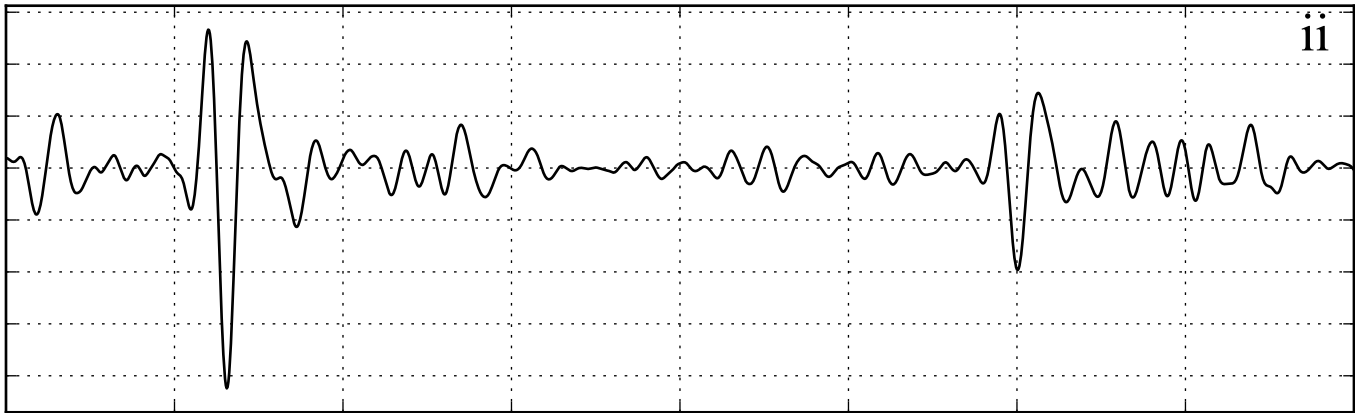

Time [s]

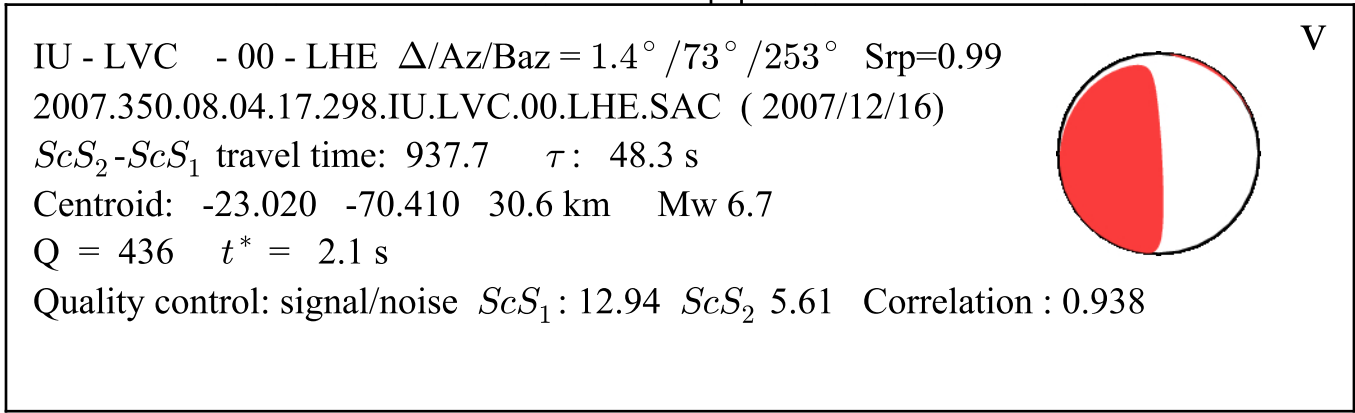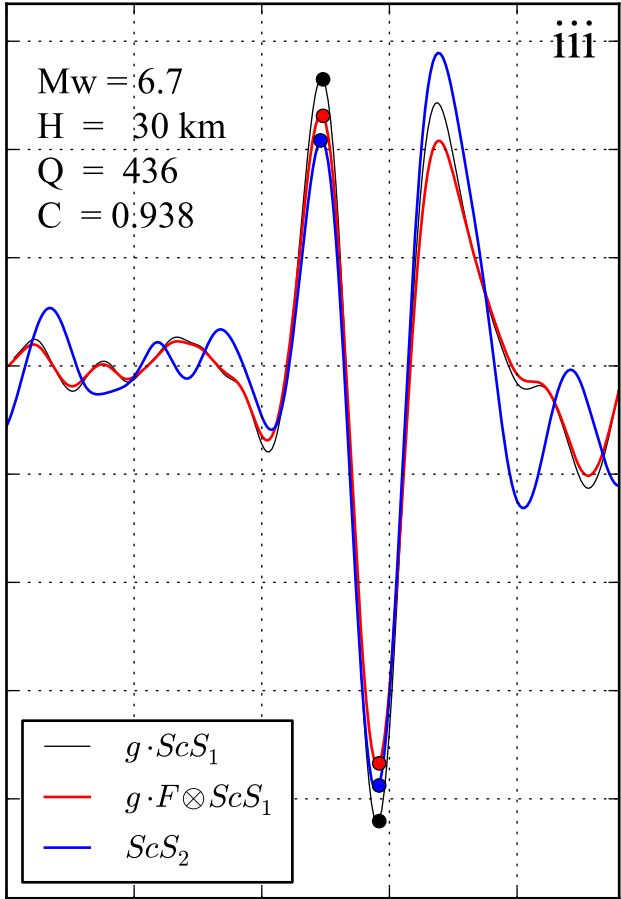

Time [s]

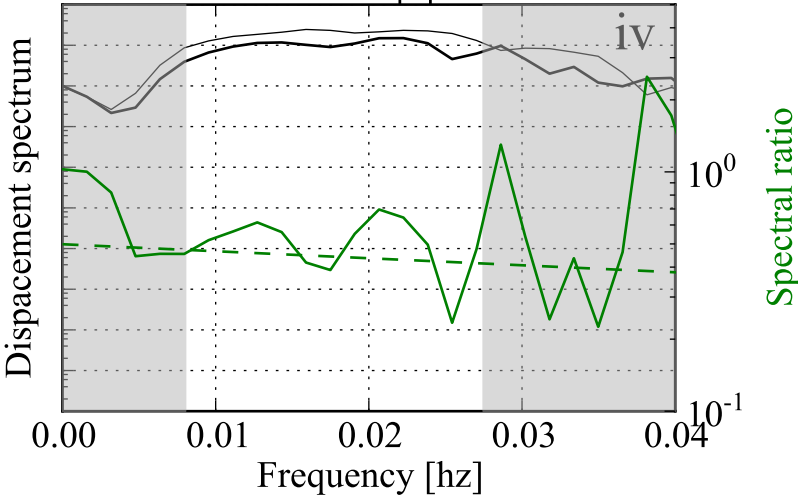

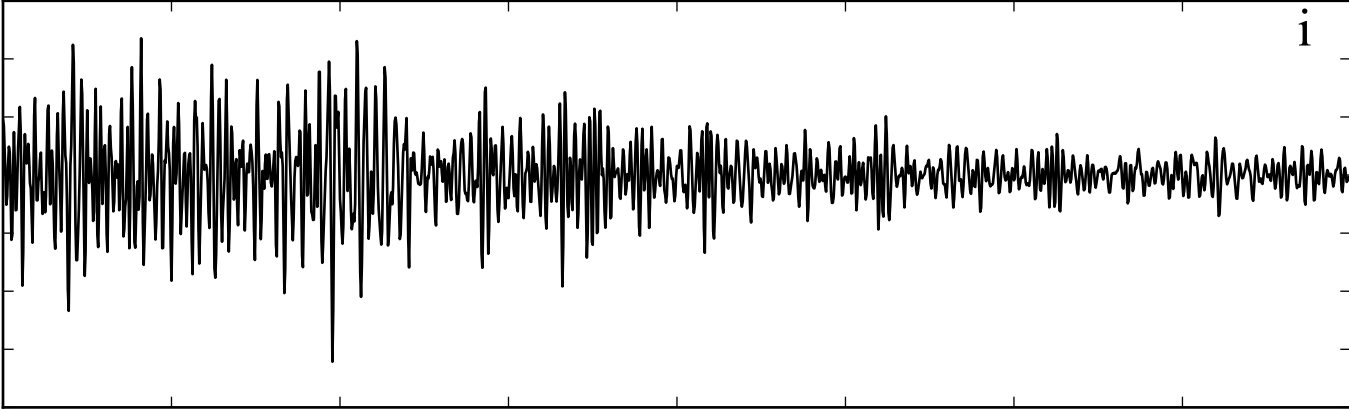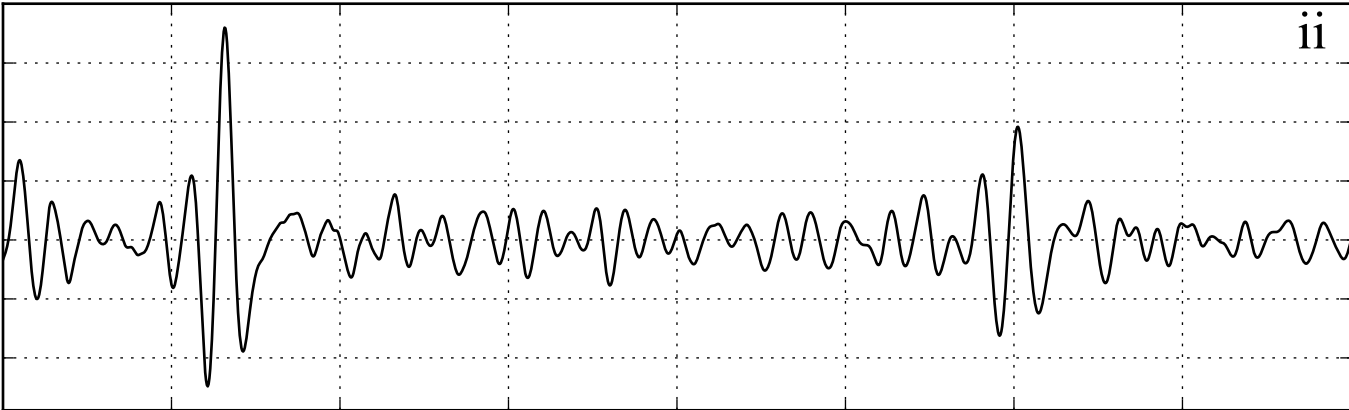

Time [s]

IU - LVC - 00 - LH2  $\Delta/Az/Baz = 3.6^\circ / 147^\circ / 326^\circ$  Srp=0.68

2009.317.03.00.57.069.IU.LVC.00.LH2.SAC ( 2009/11/13)

$ScS_2$ - $ScS_1$  travel time: 940.2  $\tau$ : 43.9 s

Centroid: -19.600 -71.010 36.2 km Mw 6.5

$Q = 1400^*$   $t^* = 0.1$  s

Quality control: signal/noise  $ScS_1$ : 7.18  $ScS_2$  4.18 Correlation : 0.897

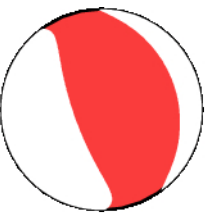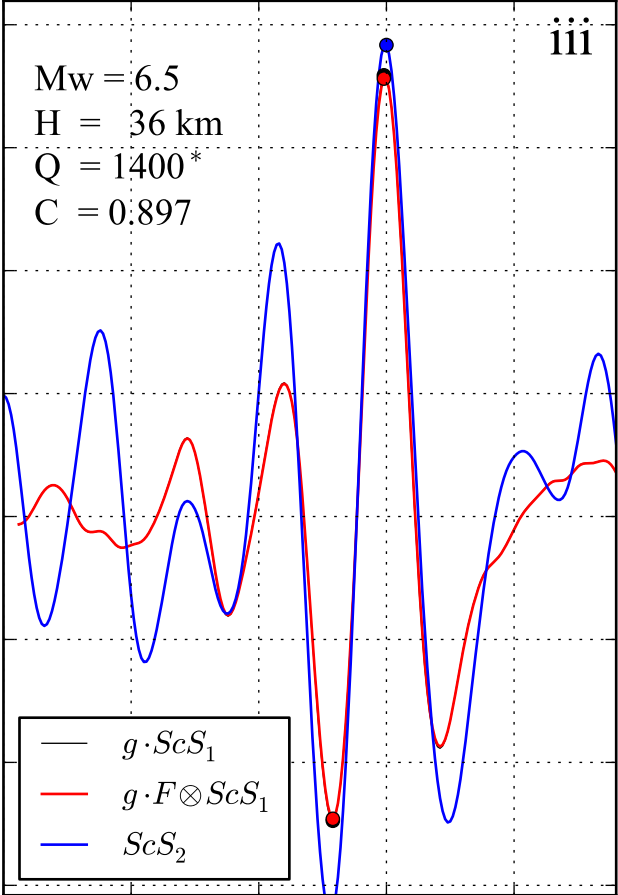

Time [s]

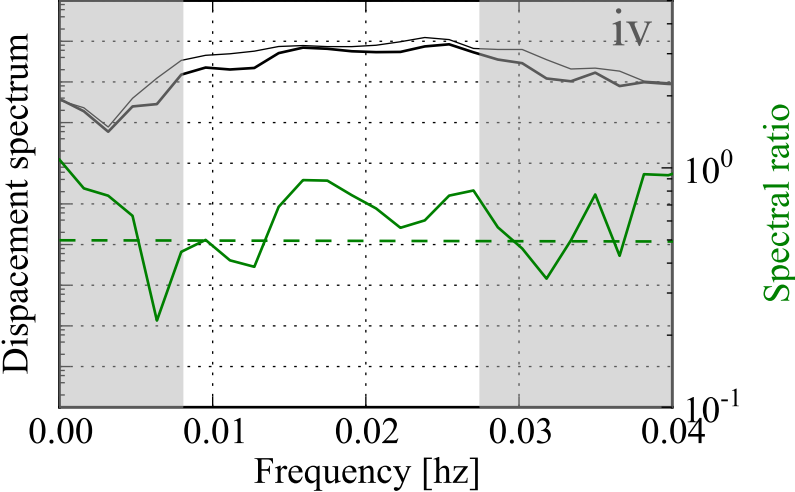

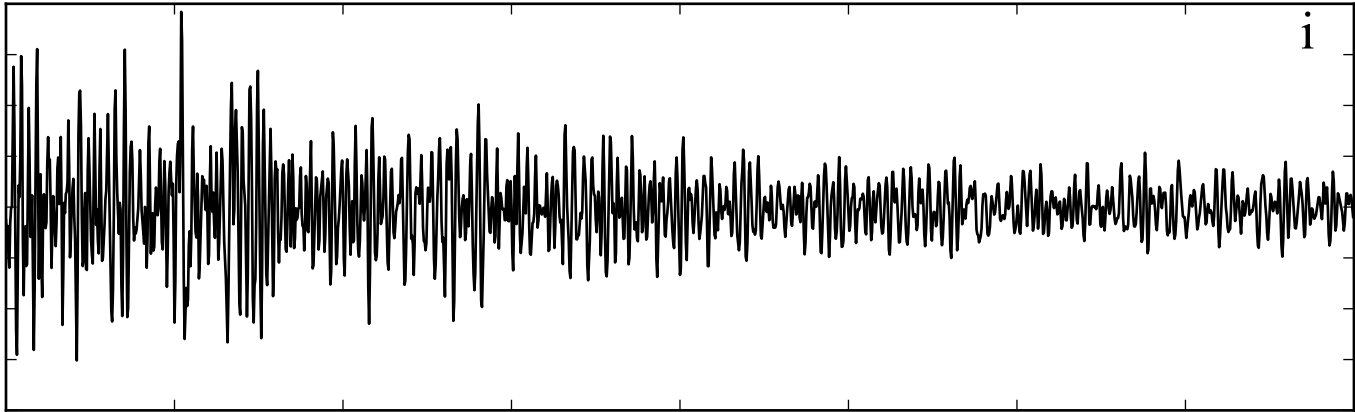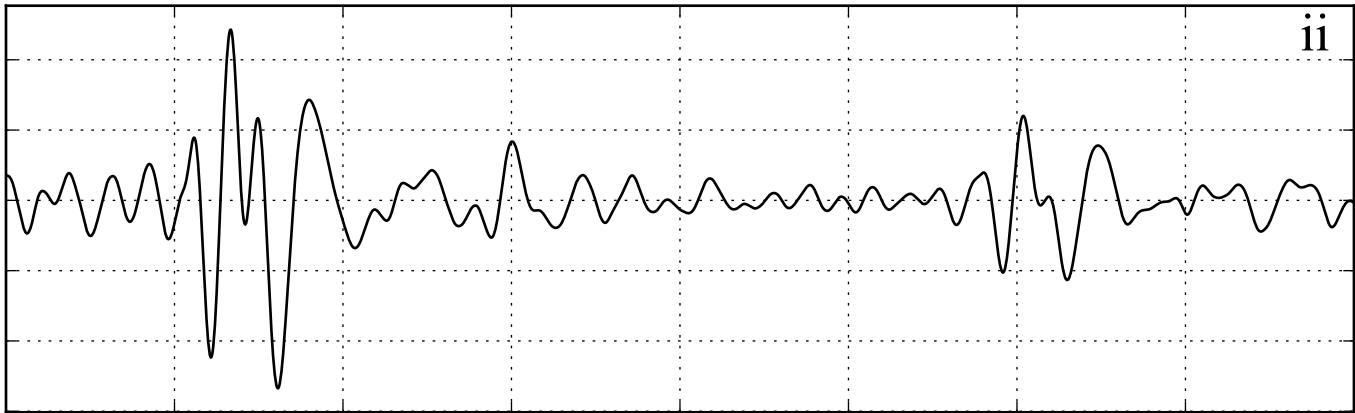

Time [s]

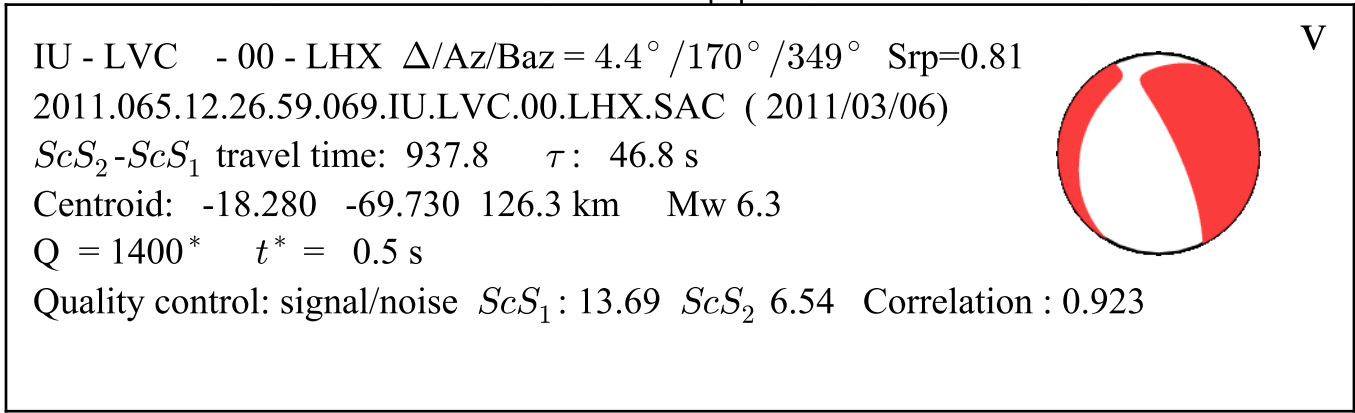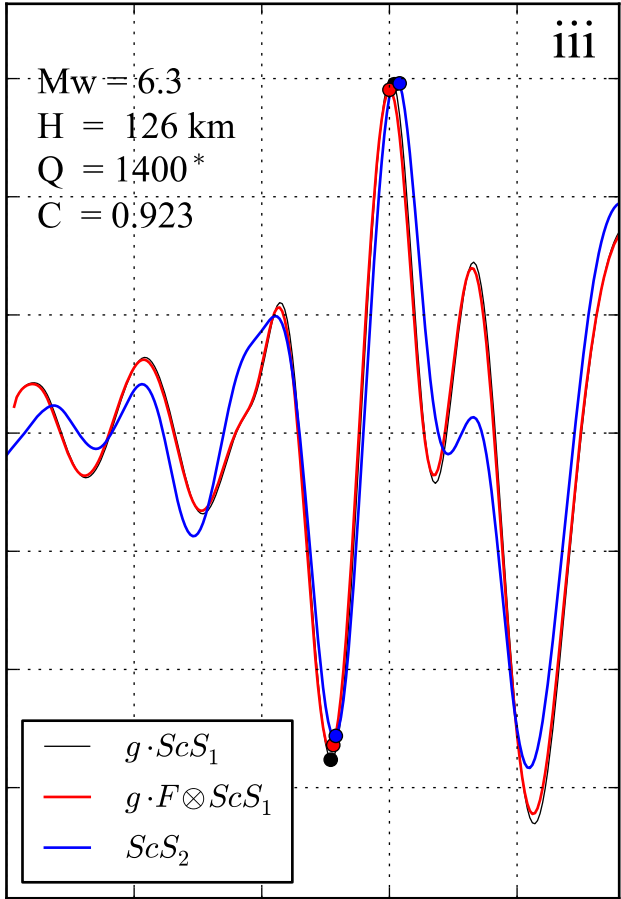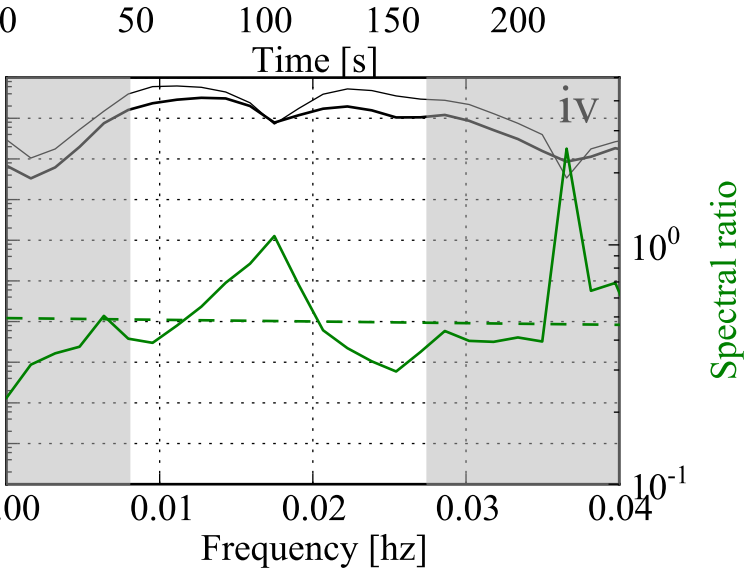



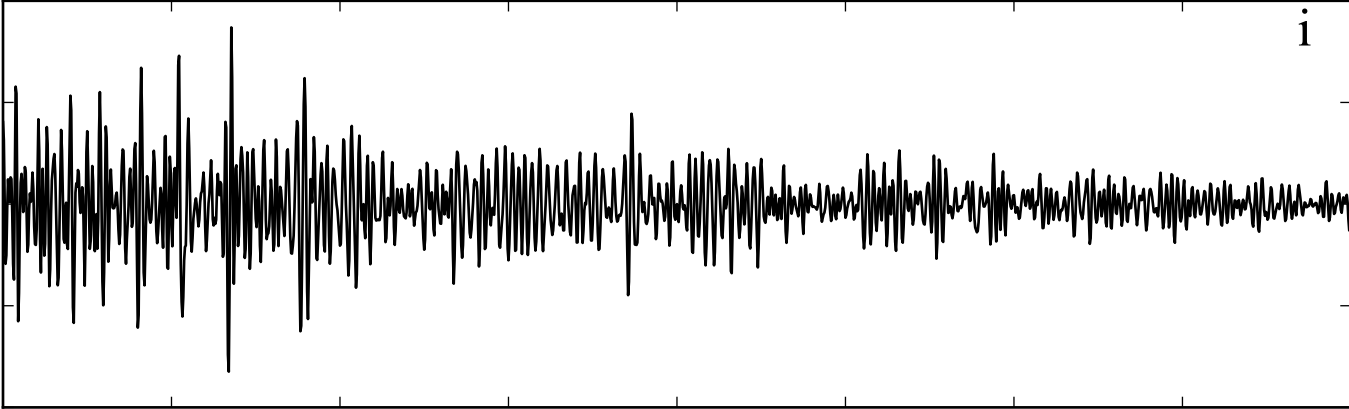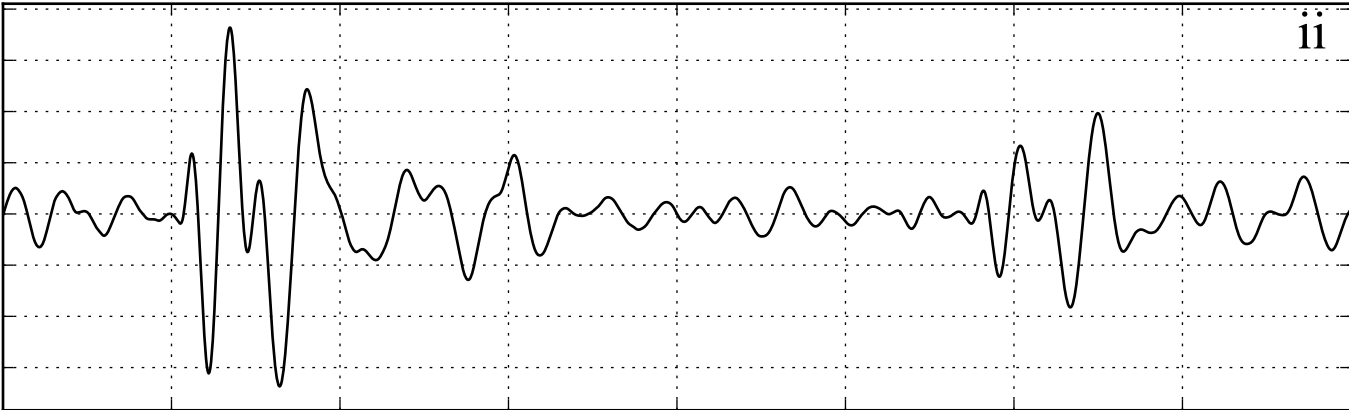

Time [s]

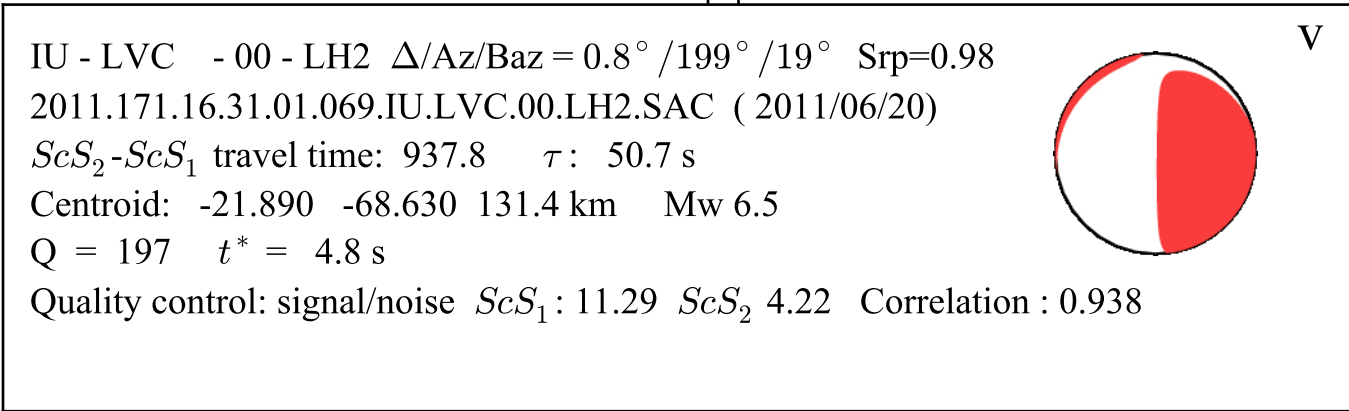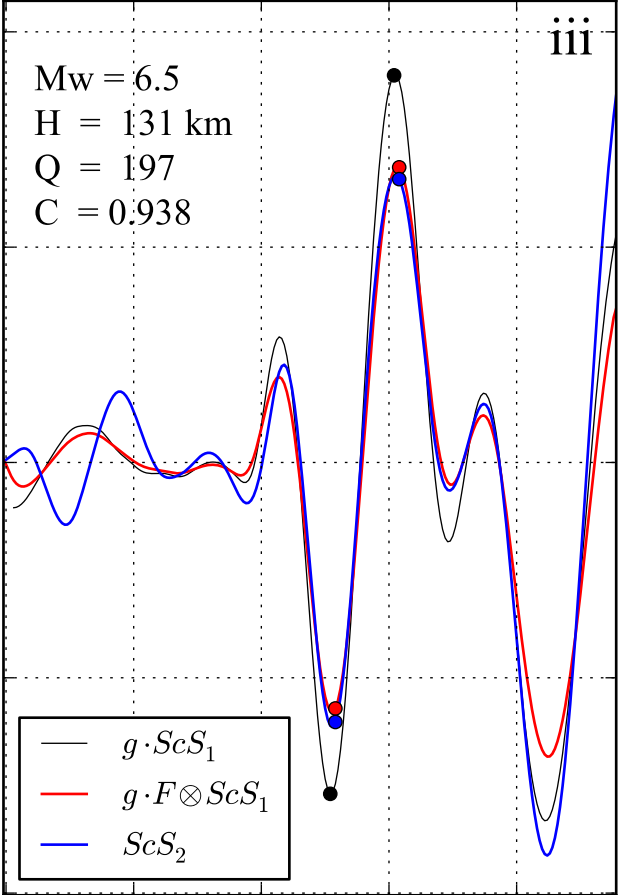

Time [s]

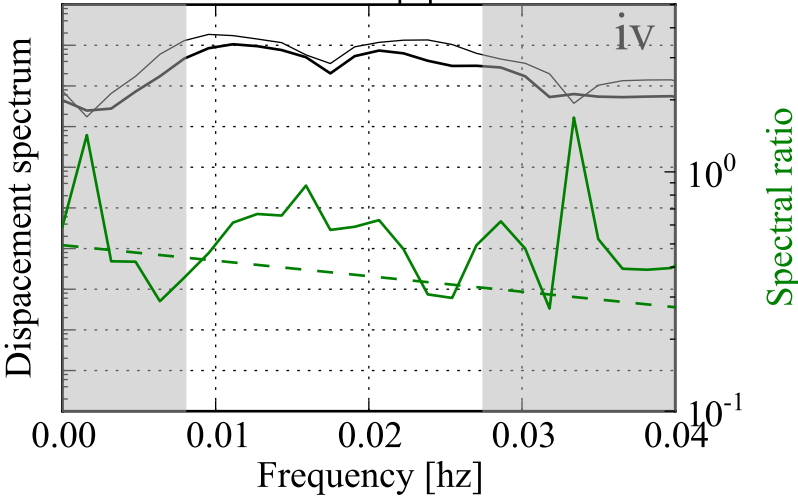

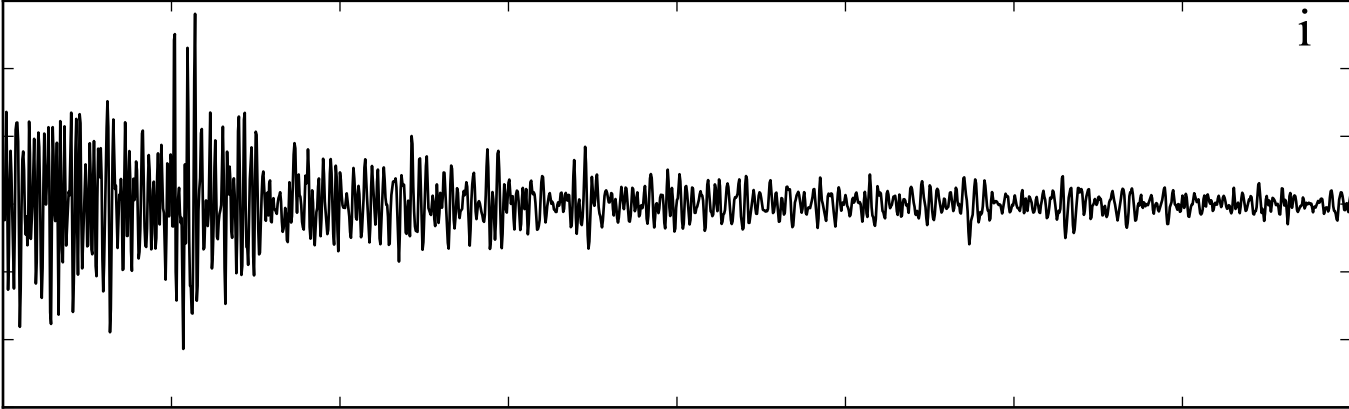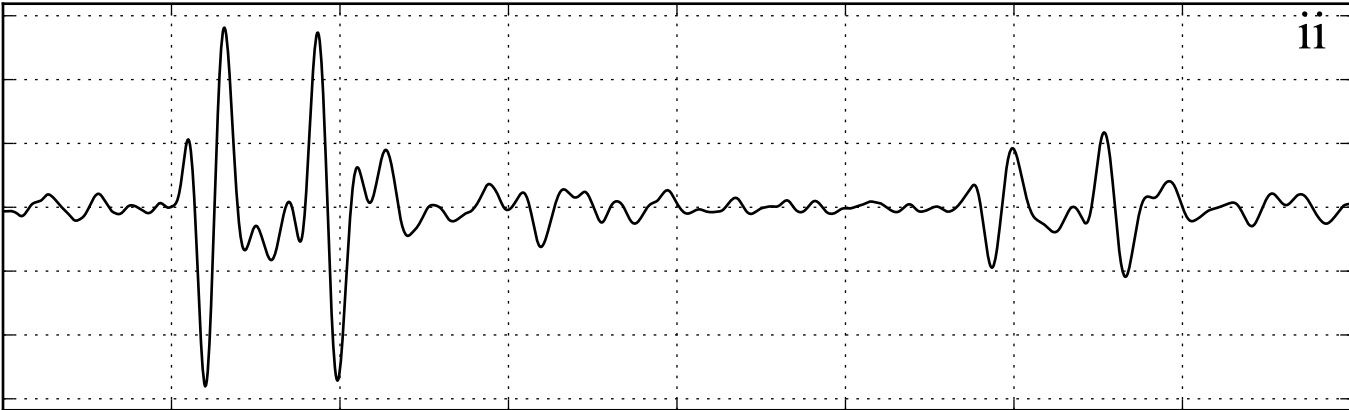

Time [s]

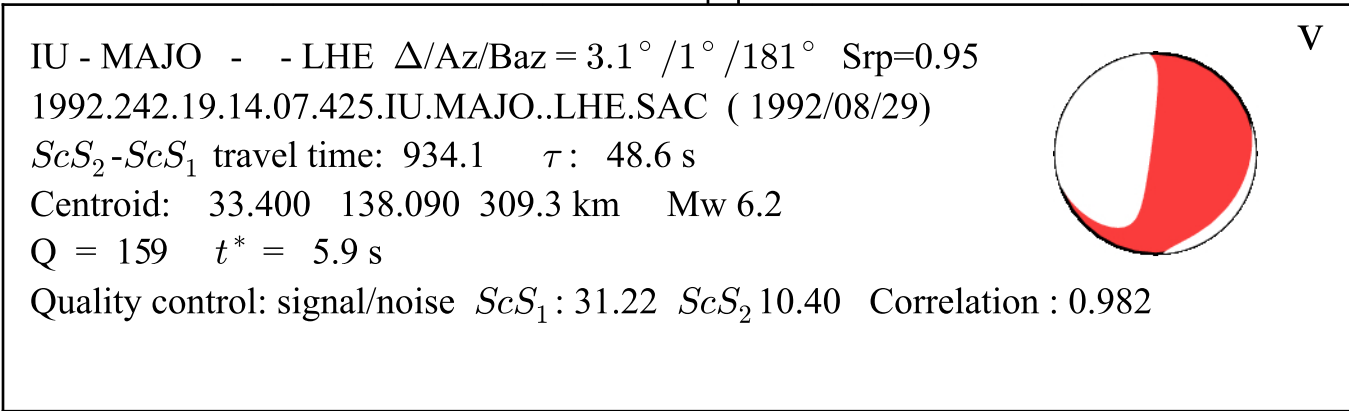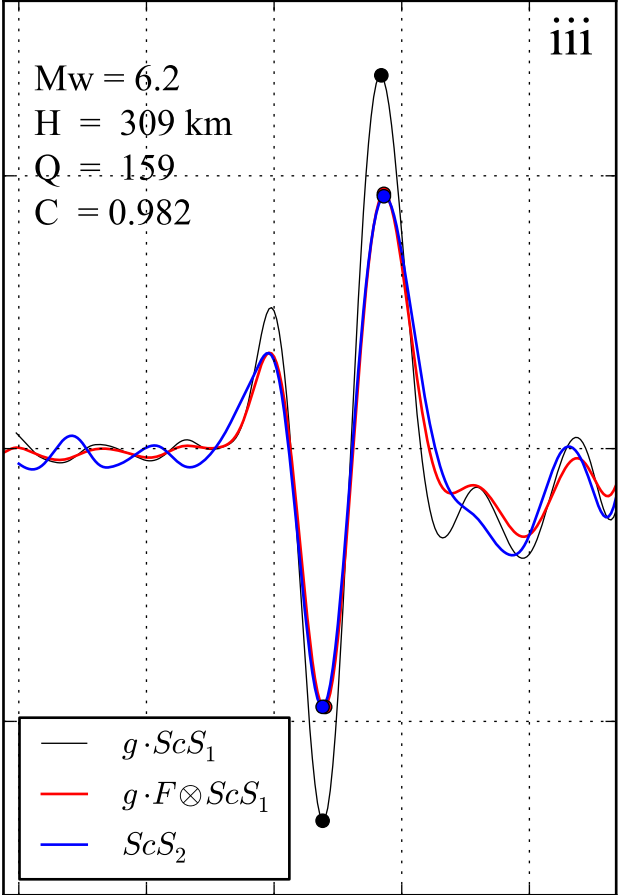

Time [s]

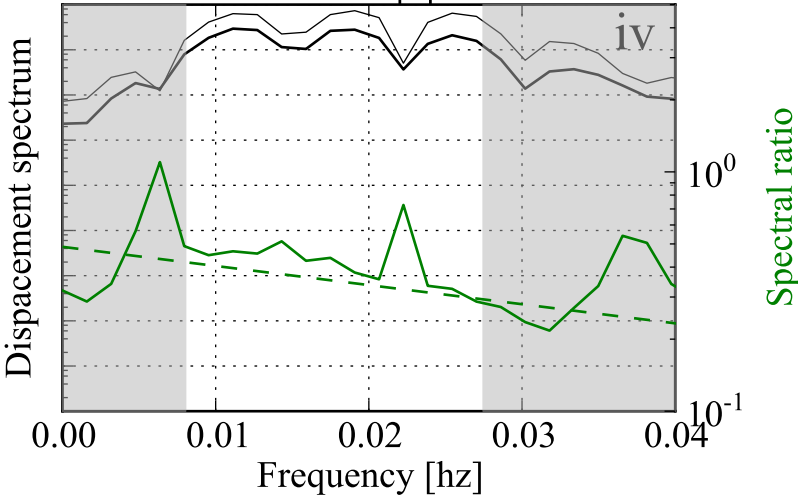

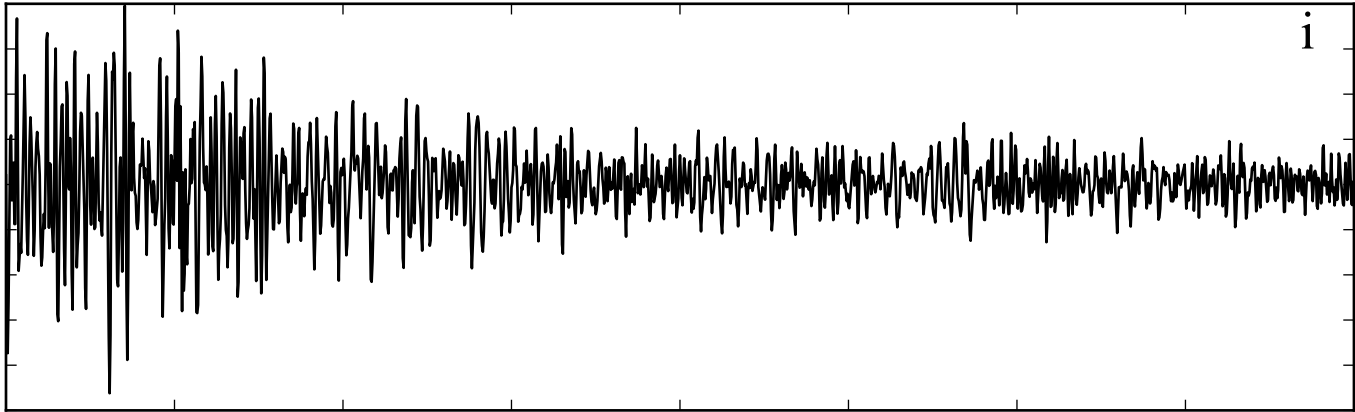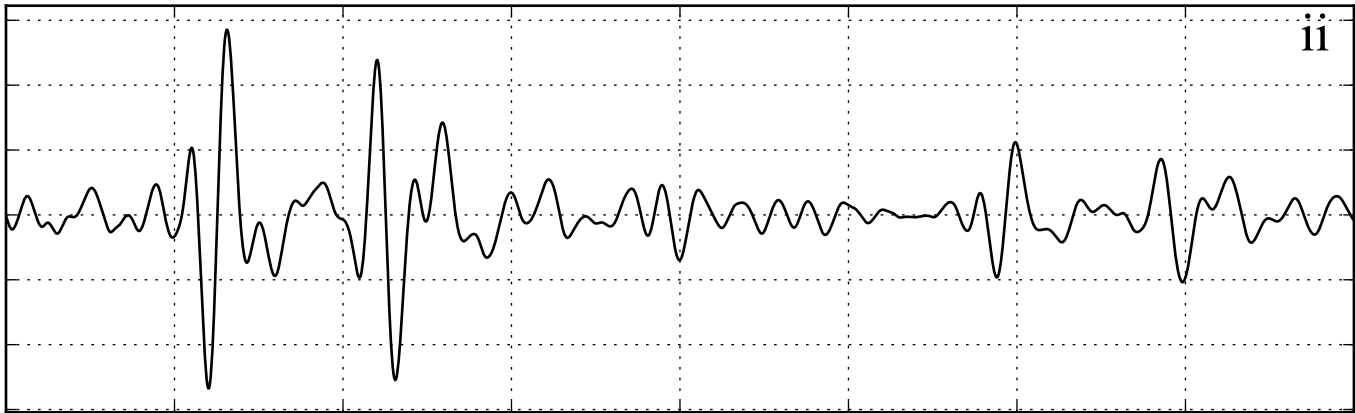

Time [s]

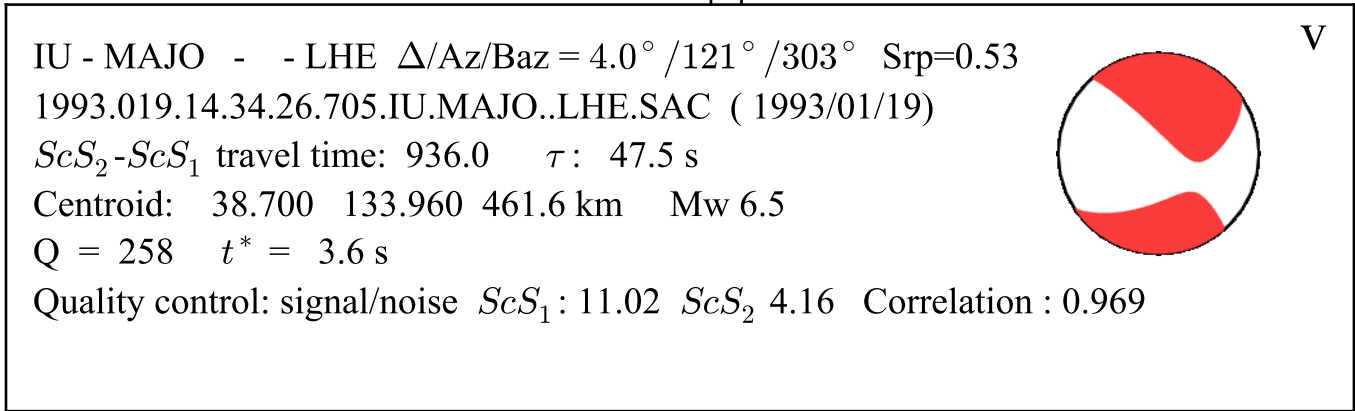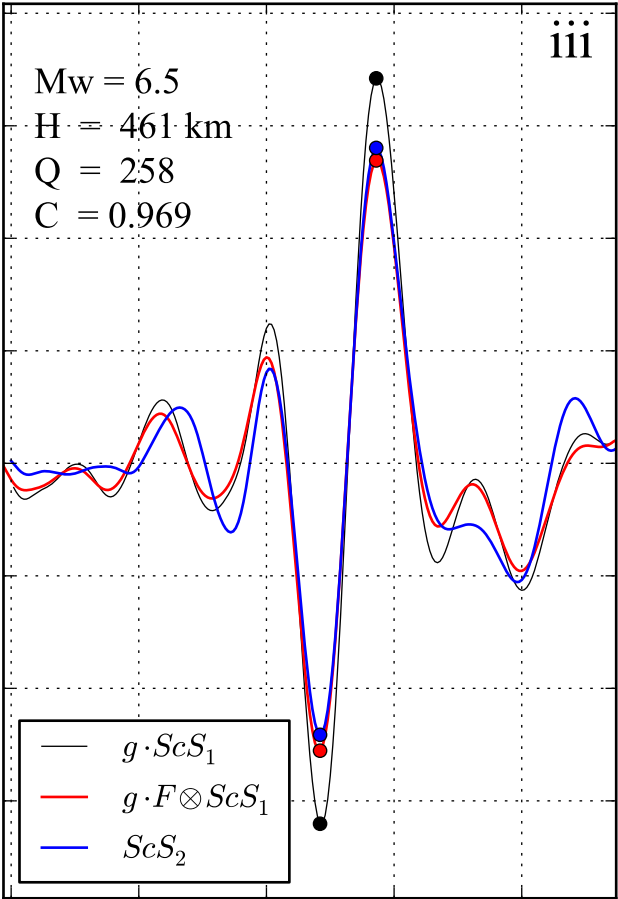

Time [s]

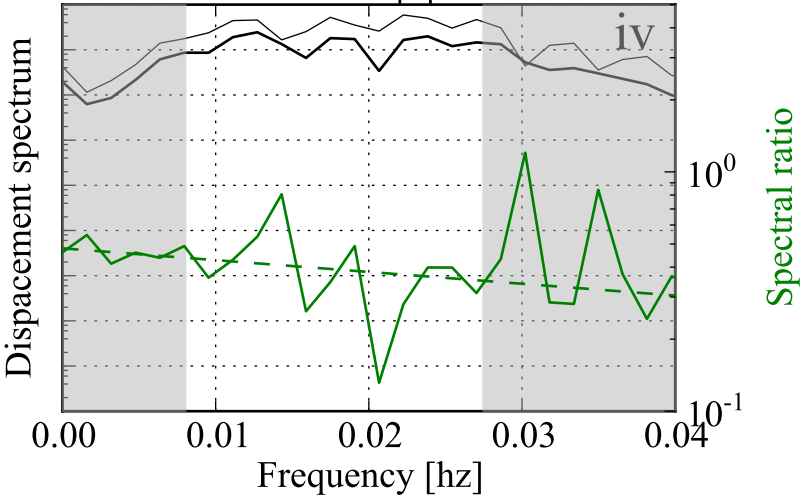

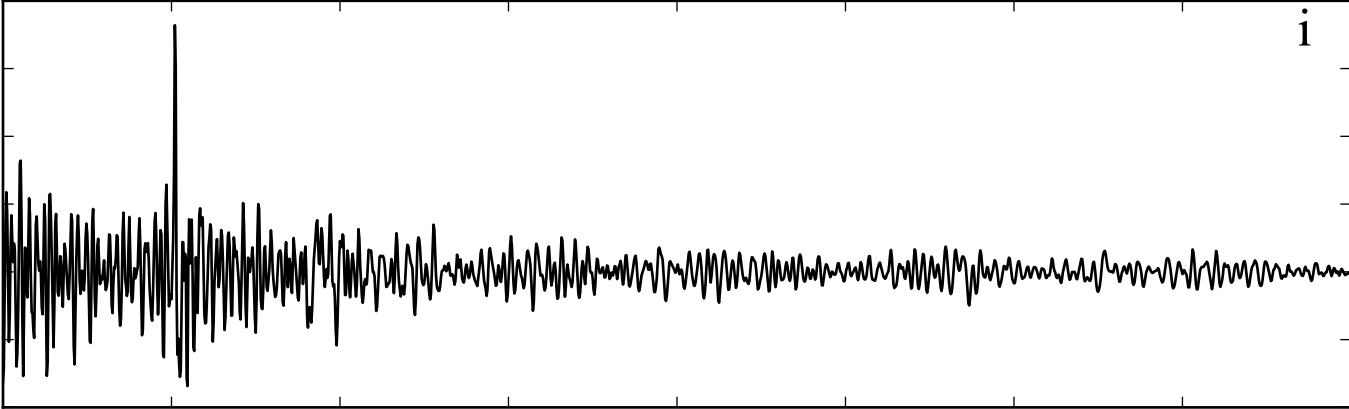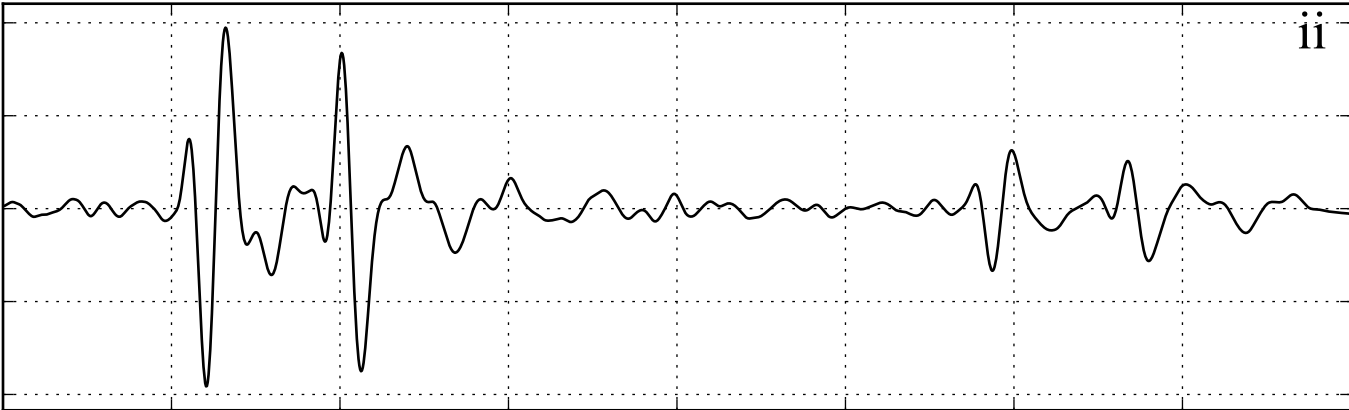

Time [s]

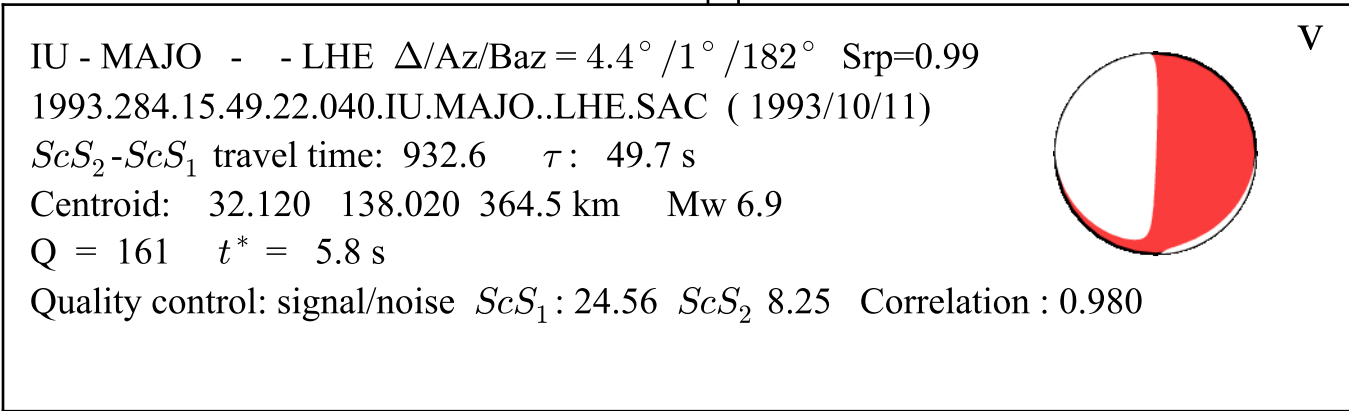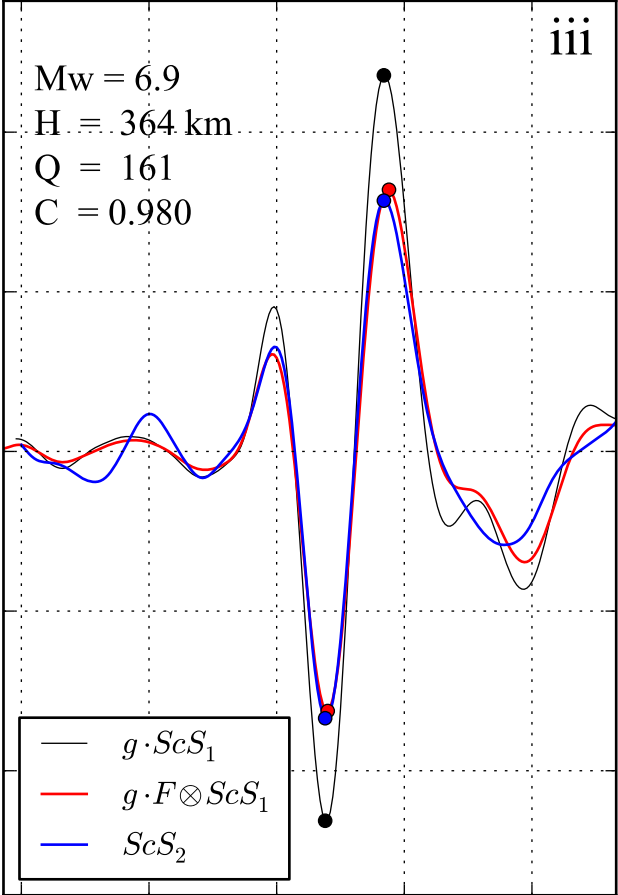

Time [s]

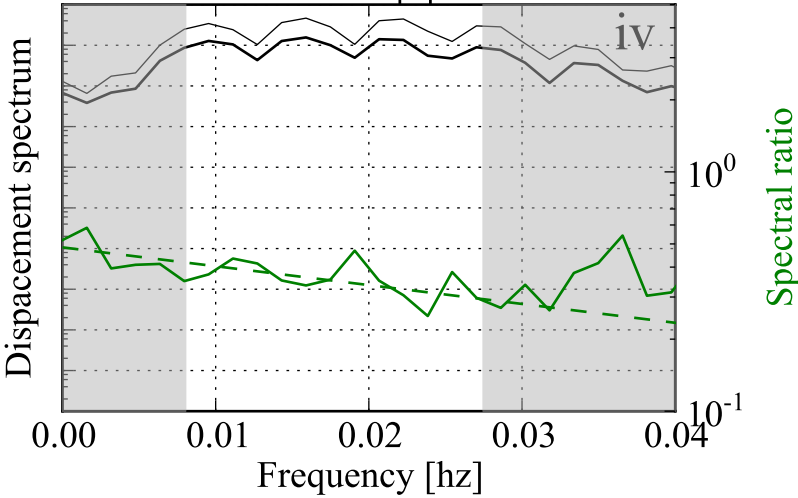

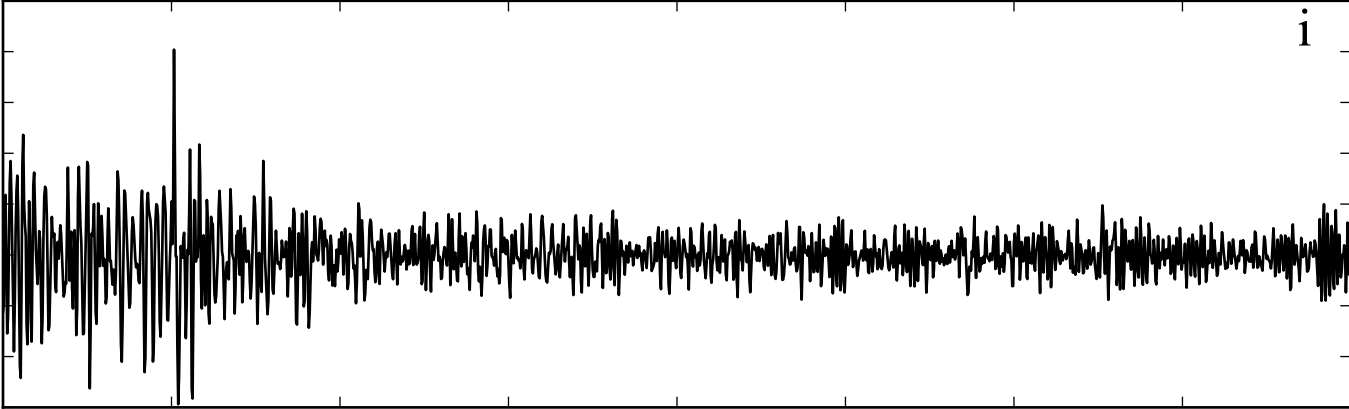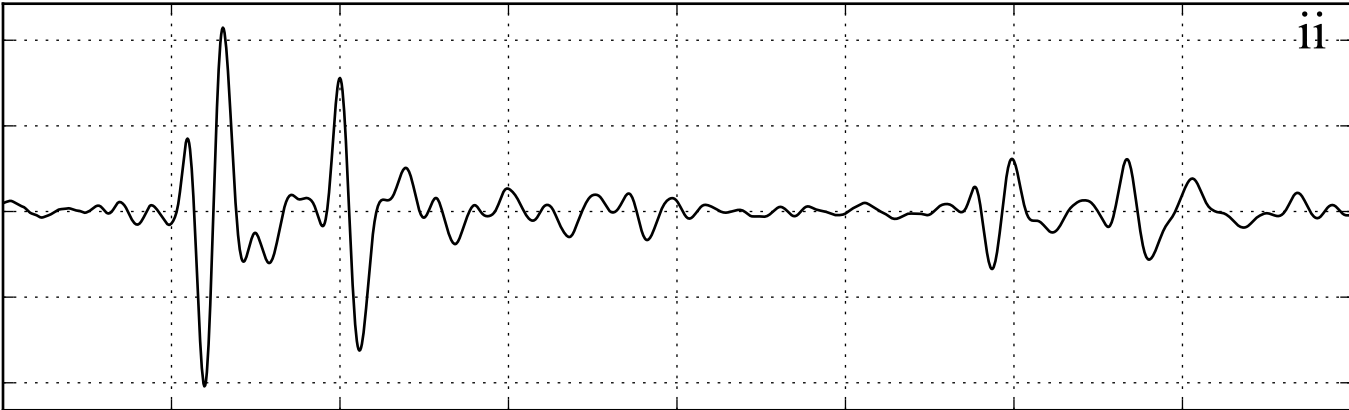

Time [s]

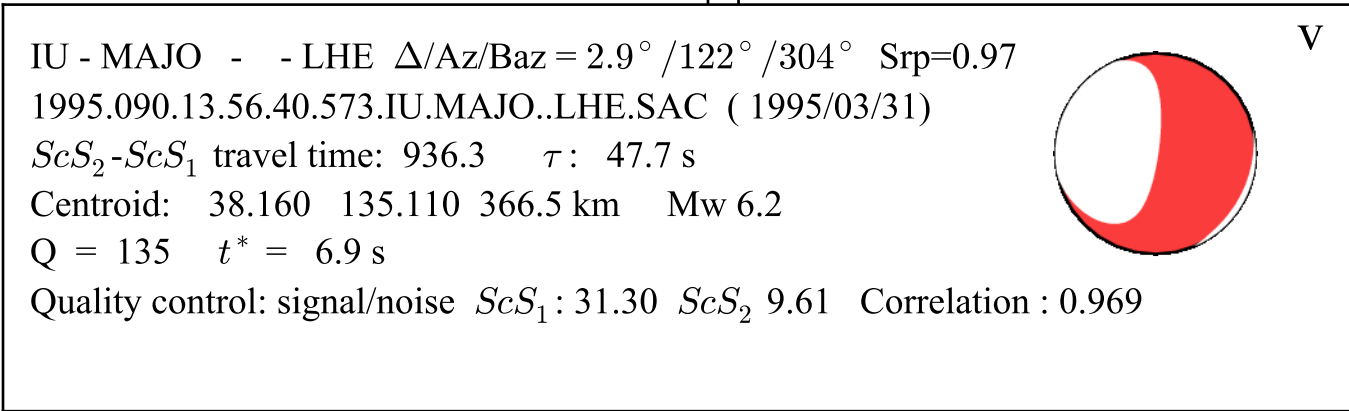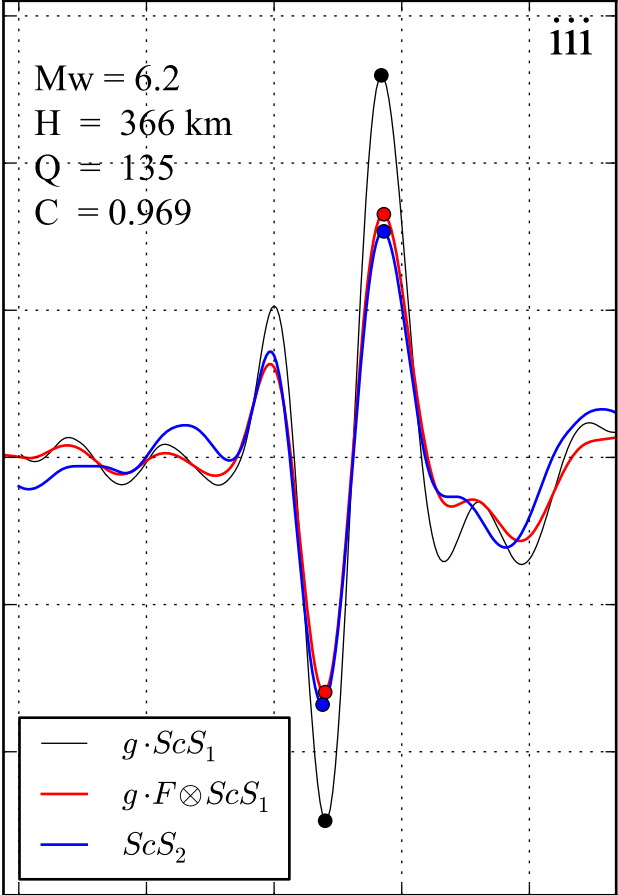

Time [s]

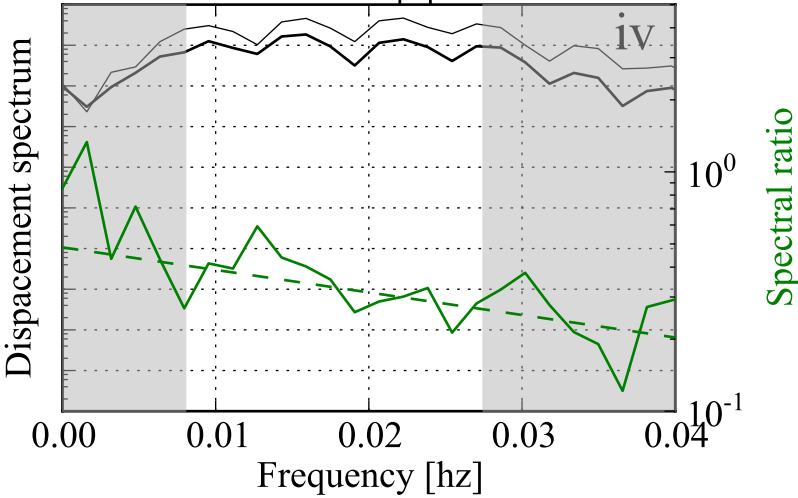

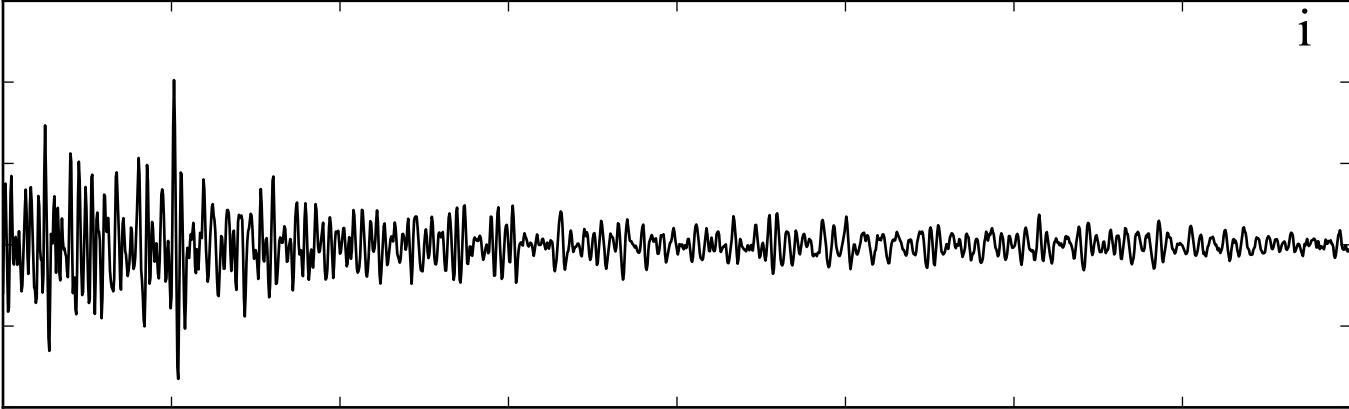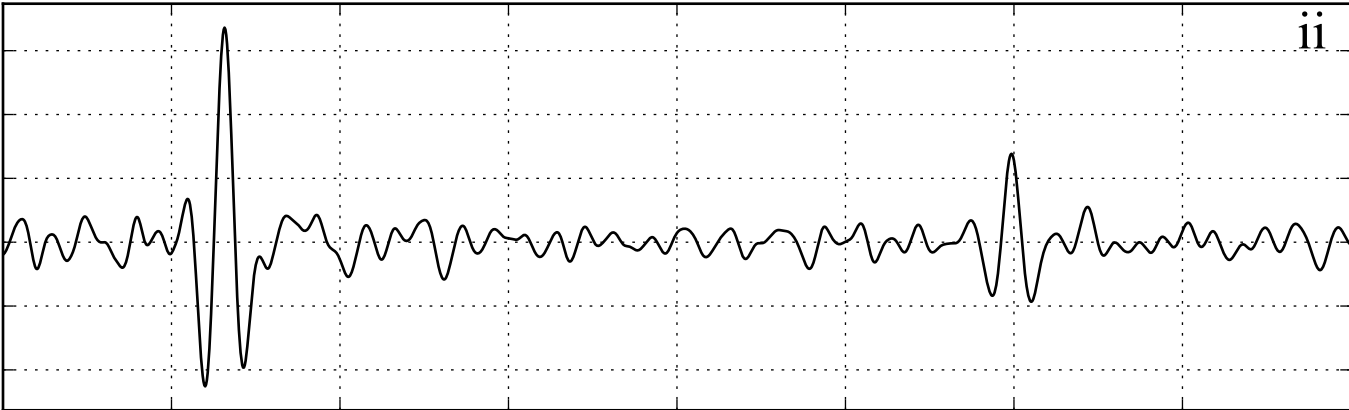

Time [s]

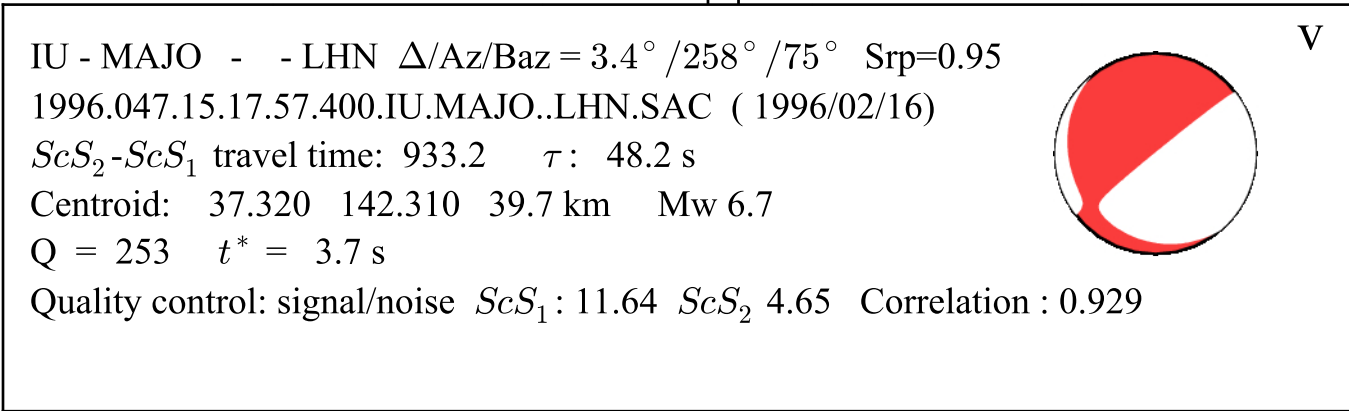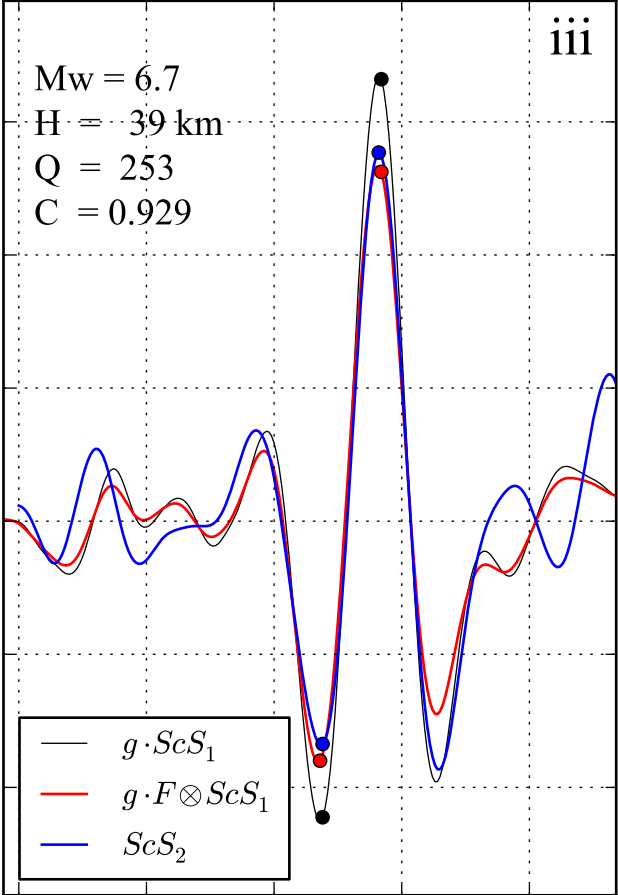

Time [s]

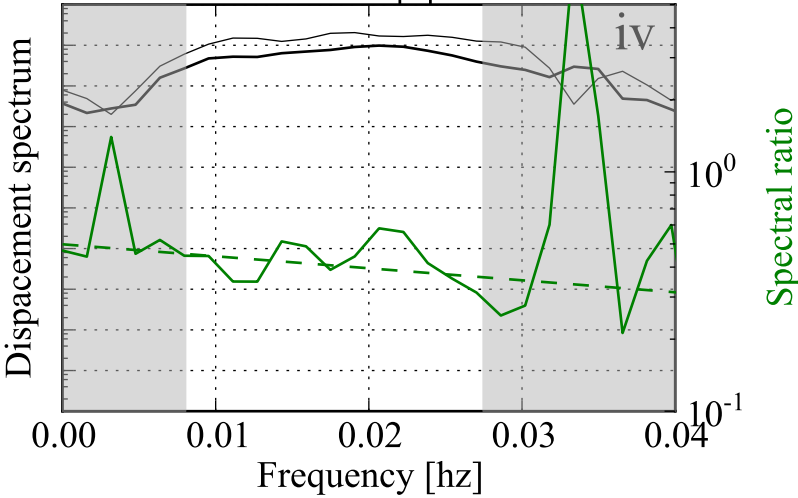

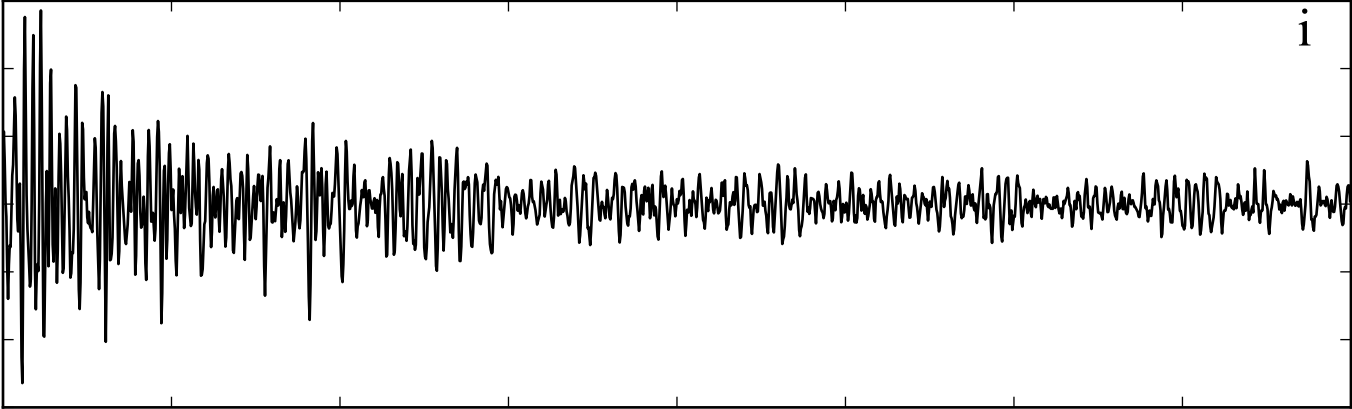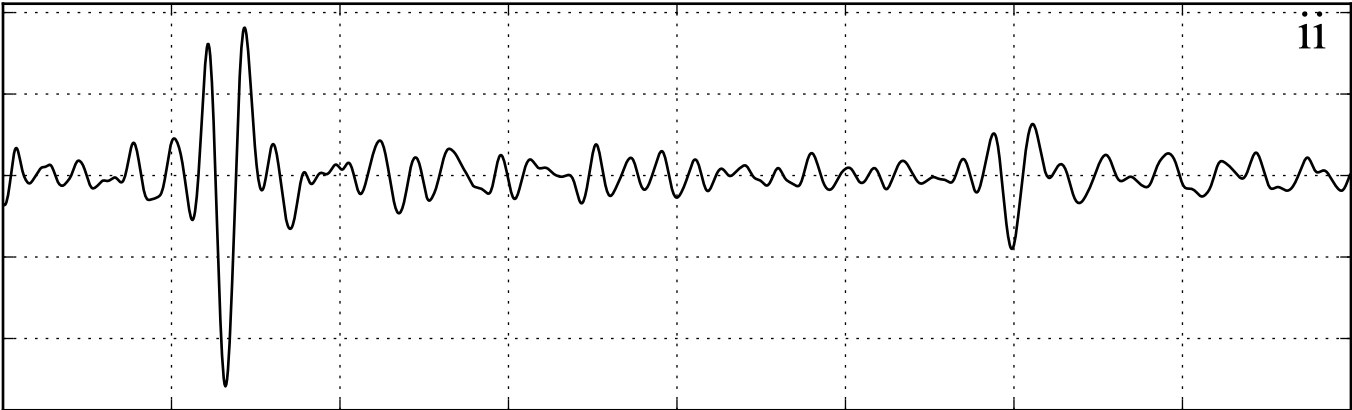

Time [s]

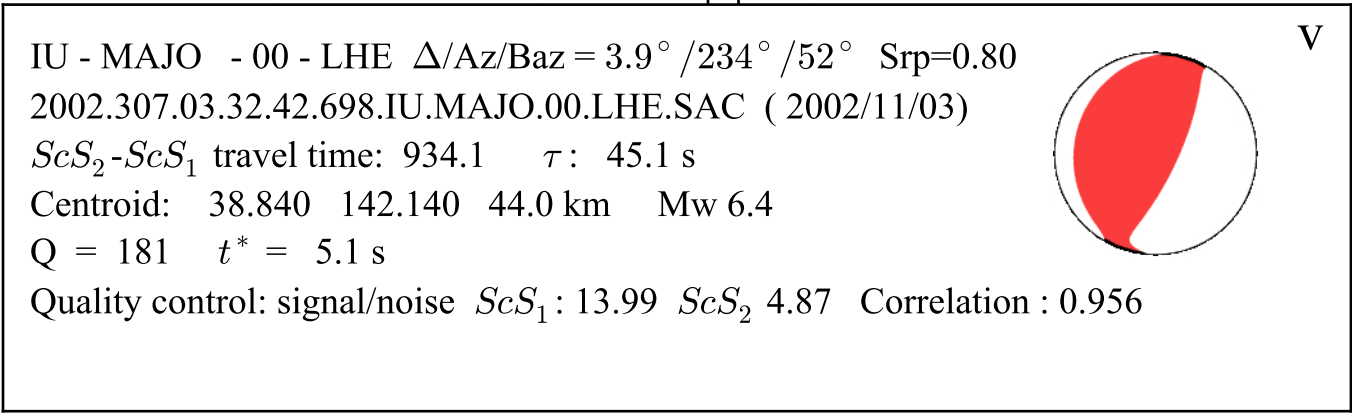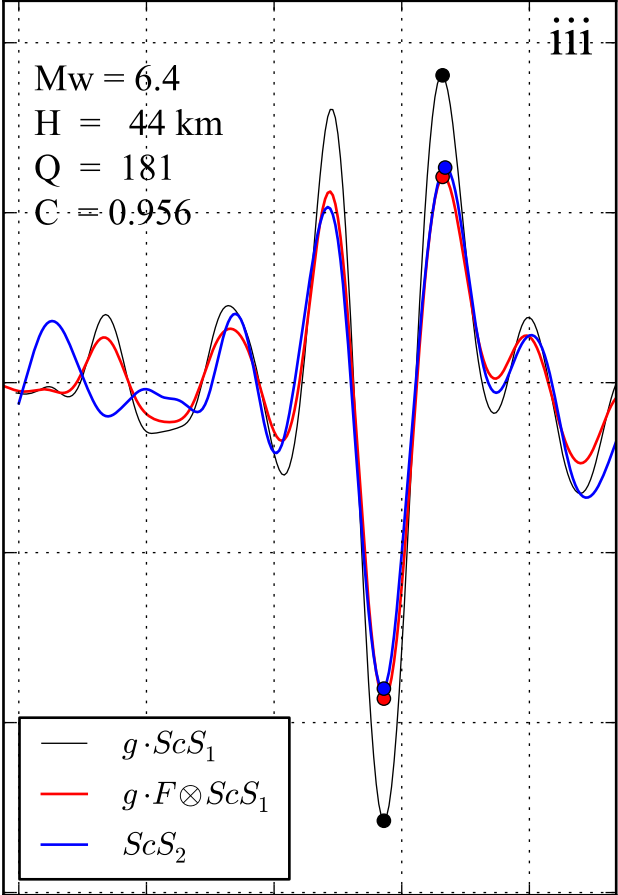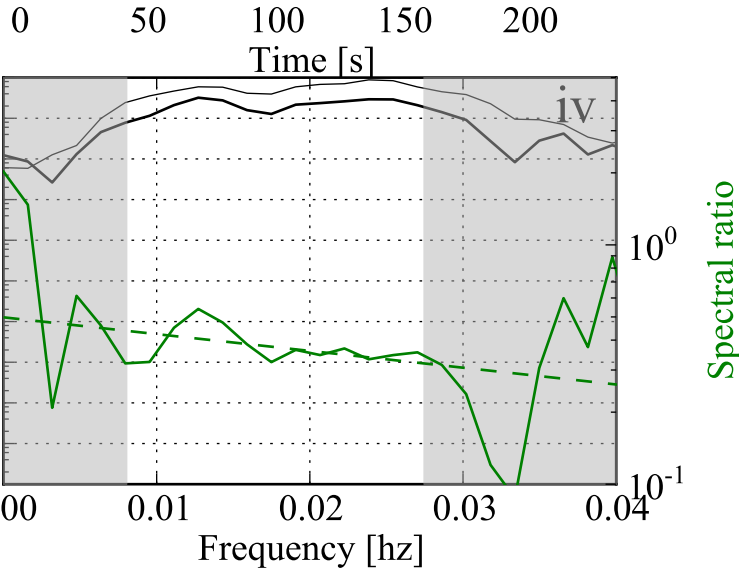

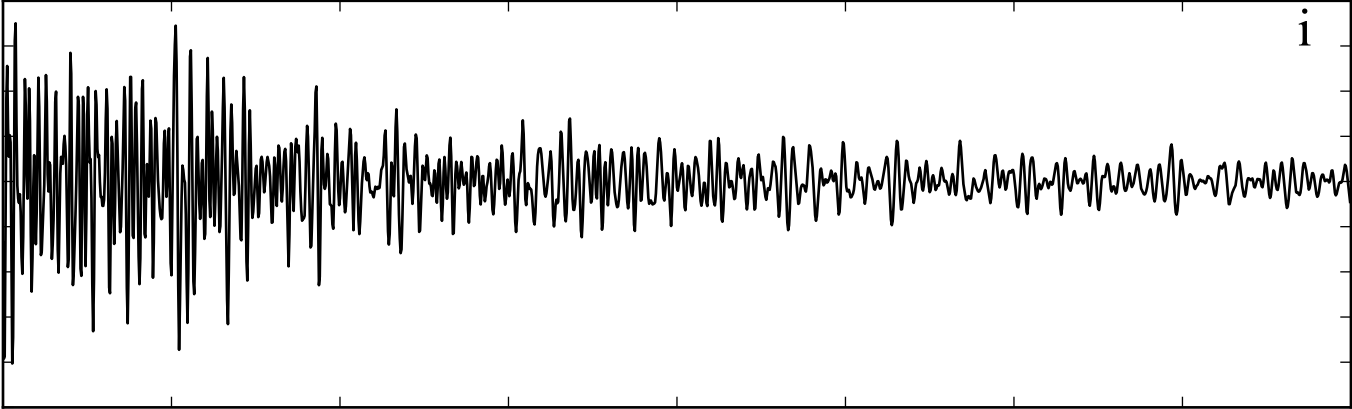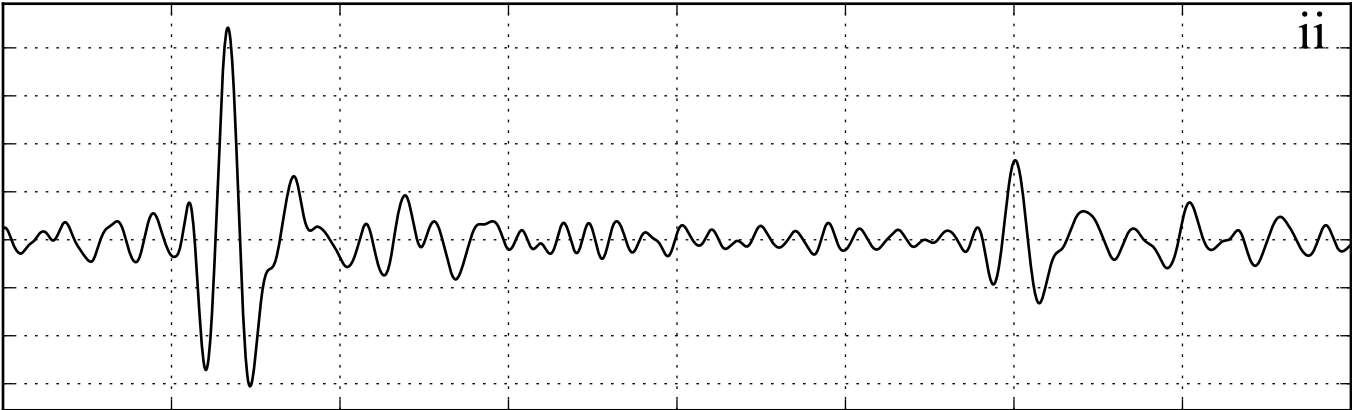

Time [s]

IU - MAJO - 00 - LHE  $\Delta/Az/Baz = 3.6^\circ / 229^\circ / 47^\circ$  Srp=0.80

2003.146.09.19.33.248.IU.MAJO.00.LHE.SAC ( 2003/05/26)

$ScS_2$ - $ScS_1$  travel time: 935.2  $\tau$ : 53.5 s

Centroid: 38.940 141.570 61.0 km Mw 7.0

Q = 248  $t^* = 3.8$  s

Quality control: signal/noise  $ScS_1$ : 16.85  $ScS_2$  6.72 Correlation : 0.978

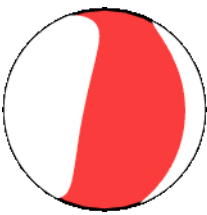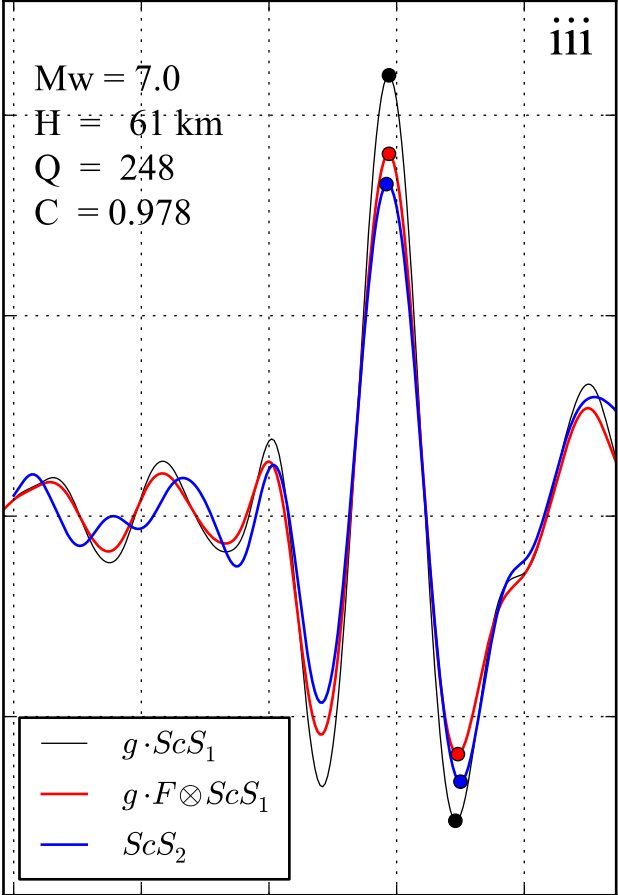

Time [s]

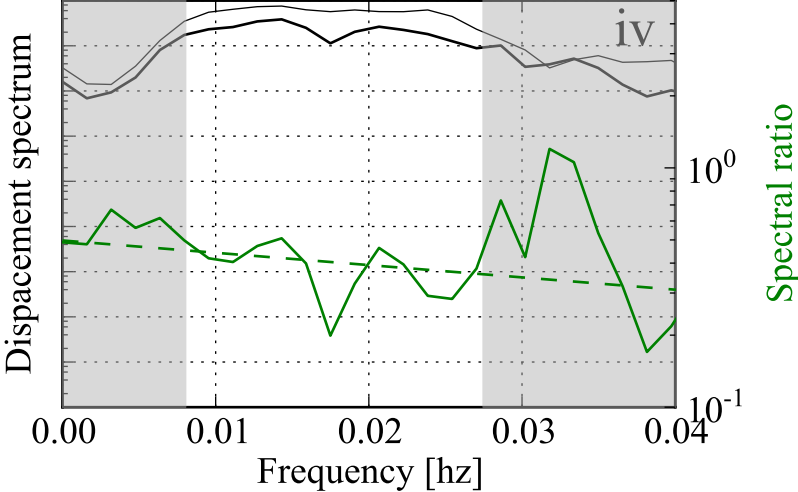



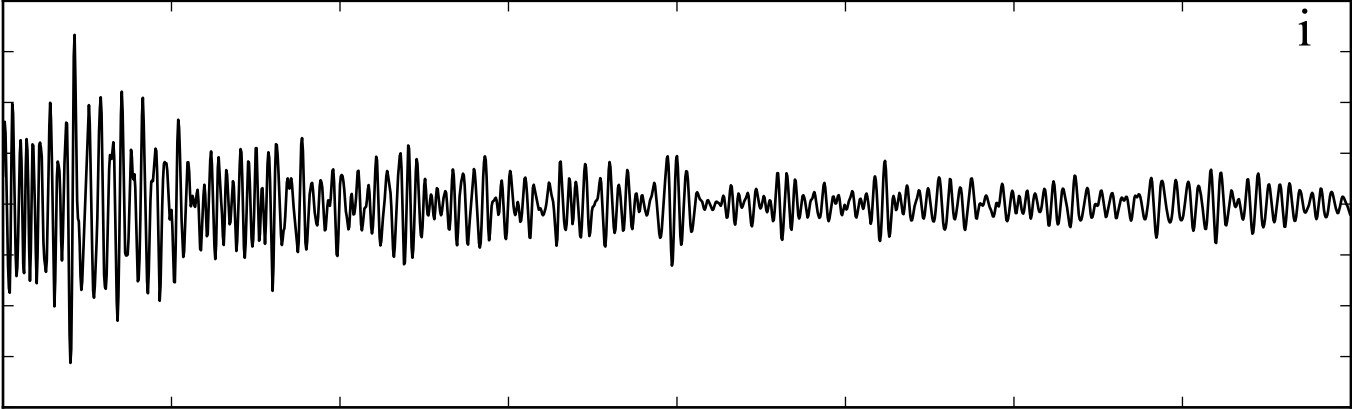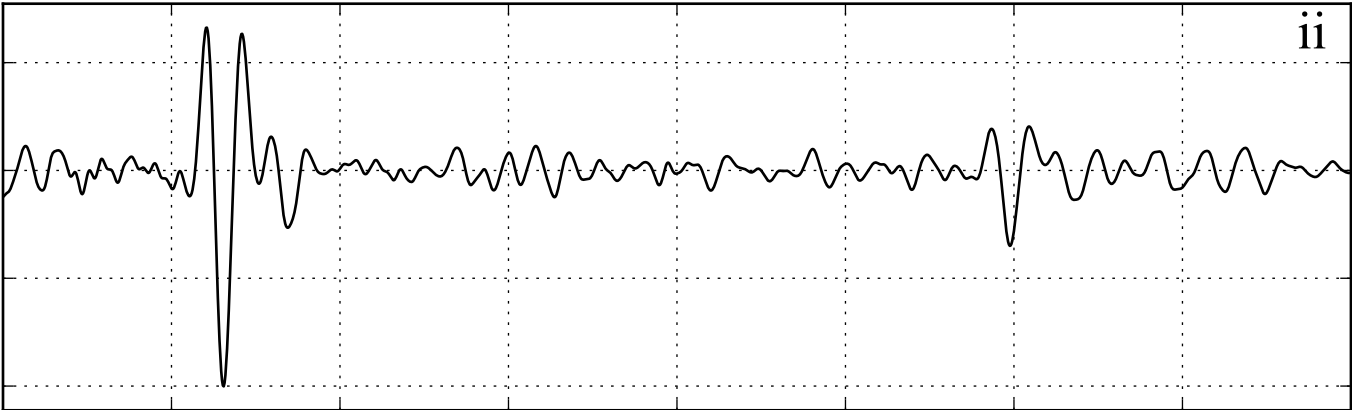

Time [s]

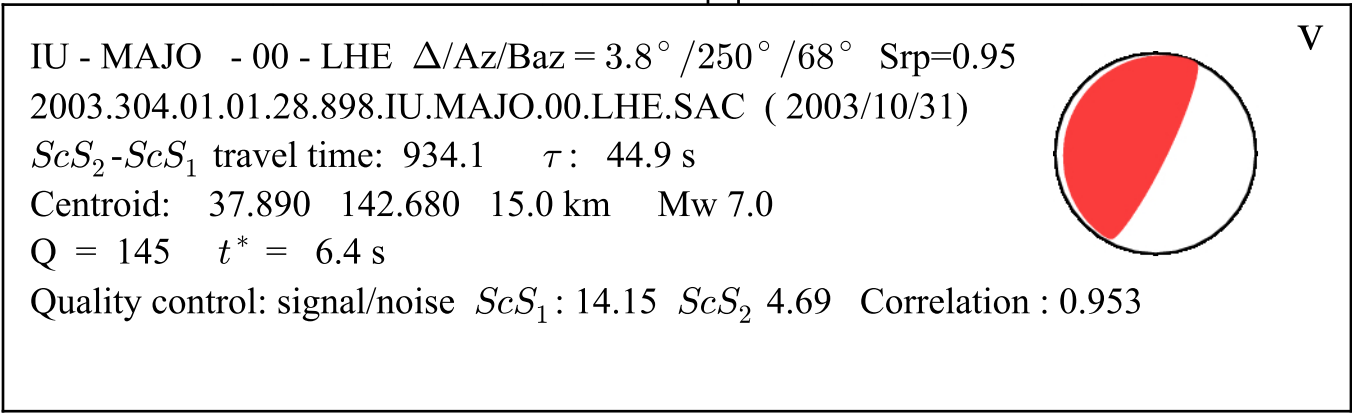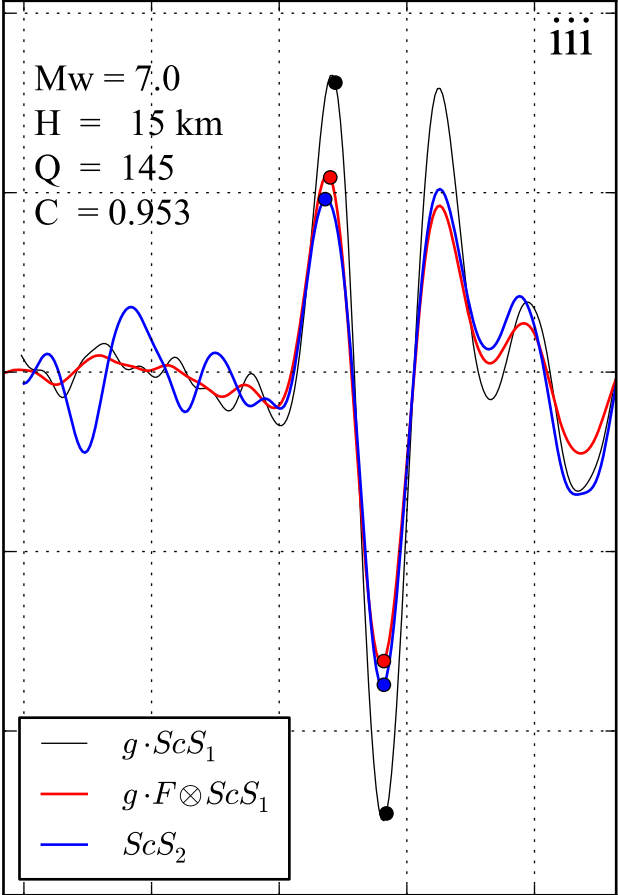

Time [s]

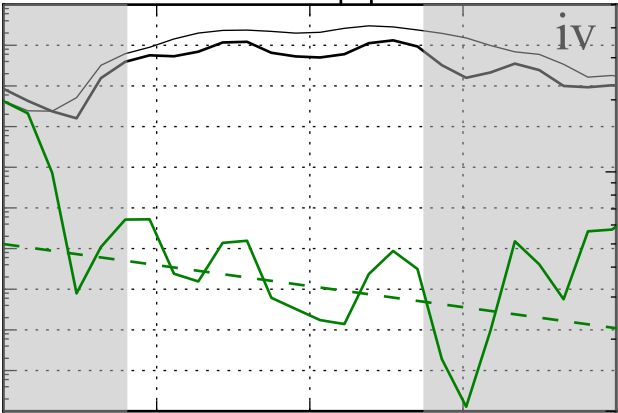

Frequency [hz]

Spectral ratio

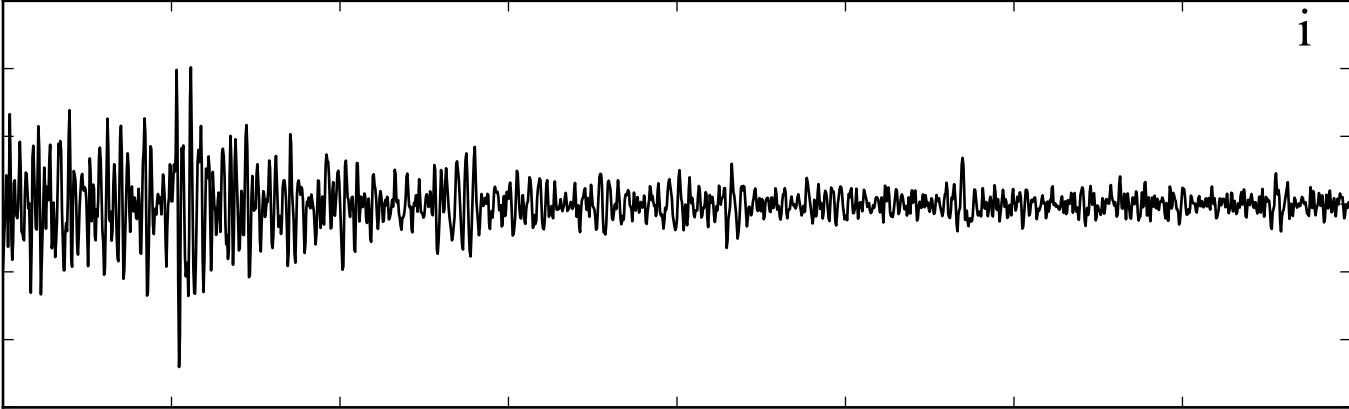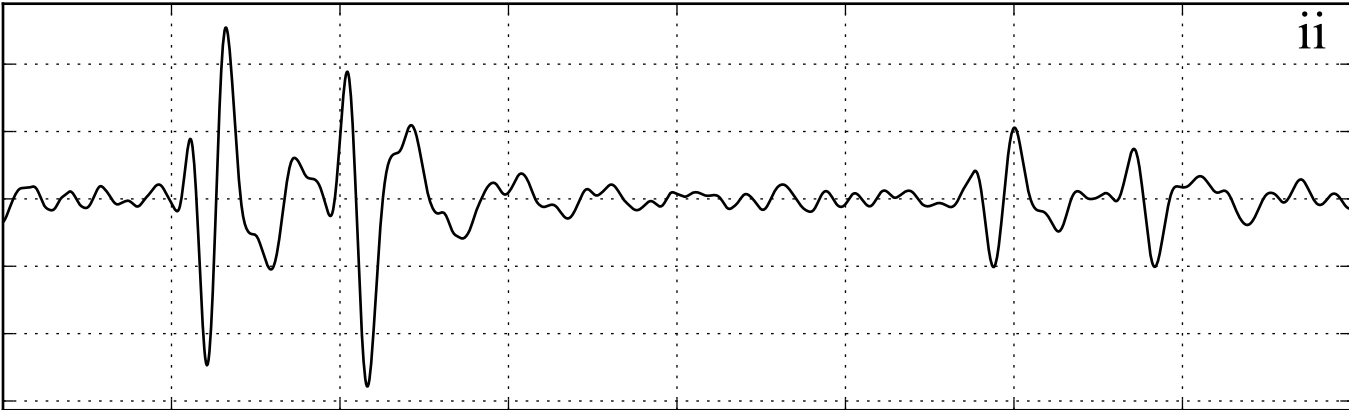

Time [s]

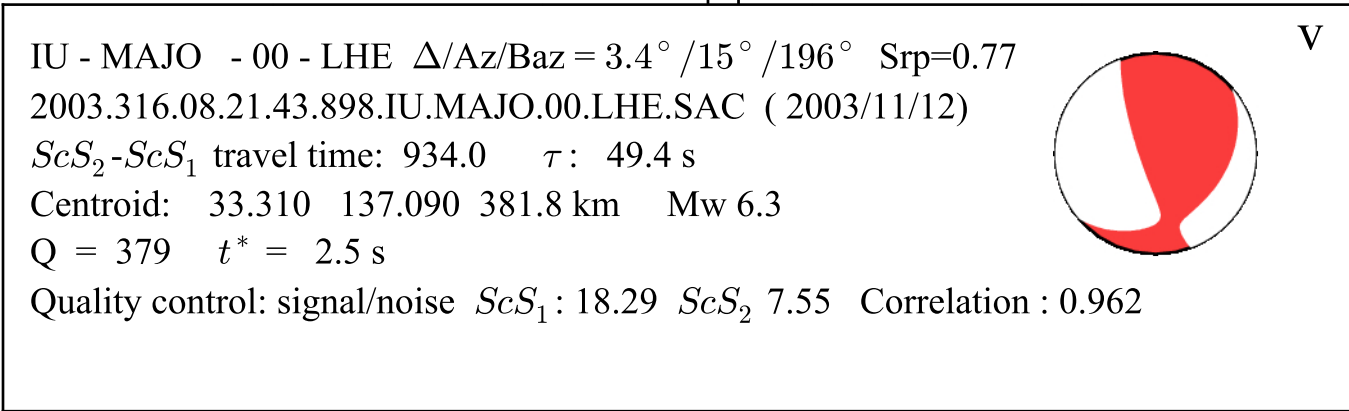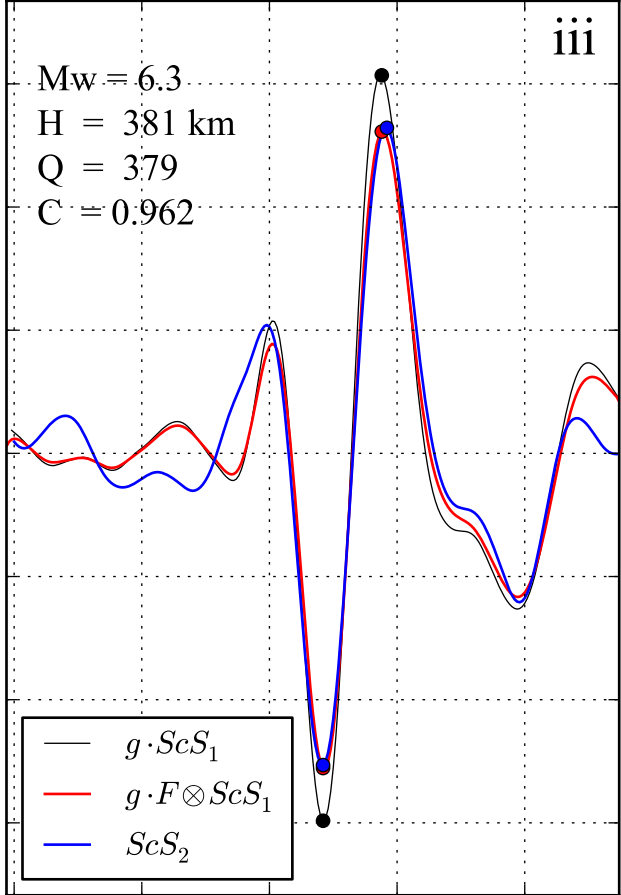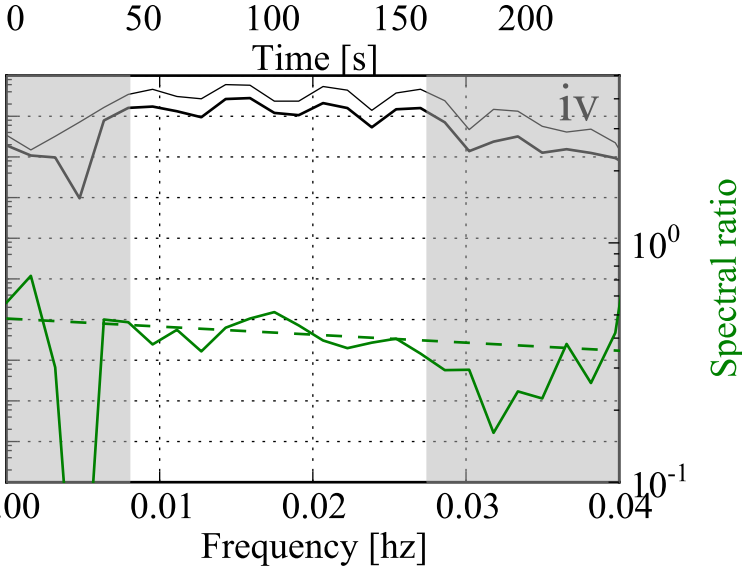

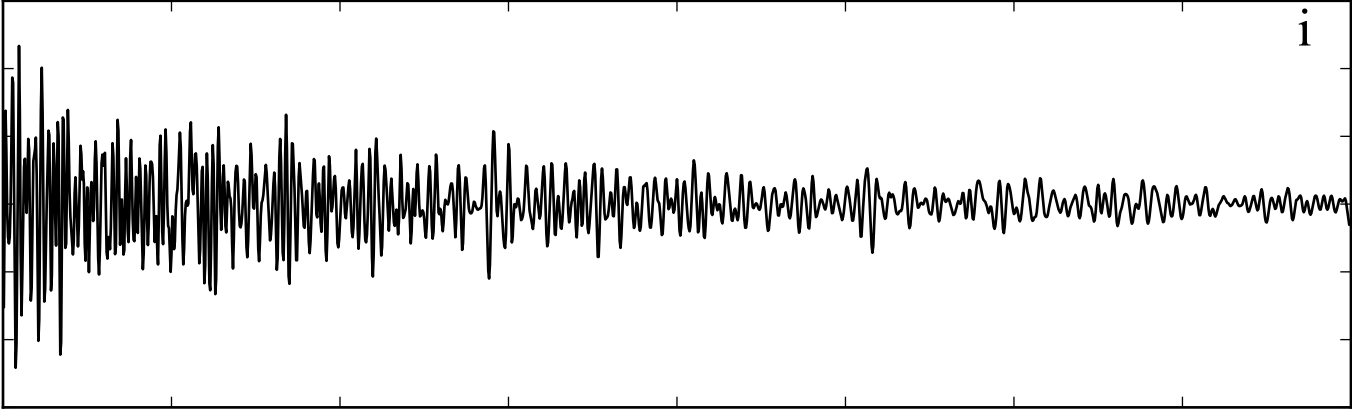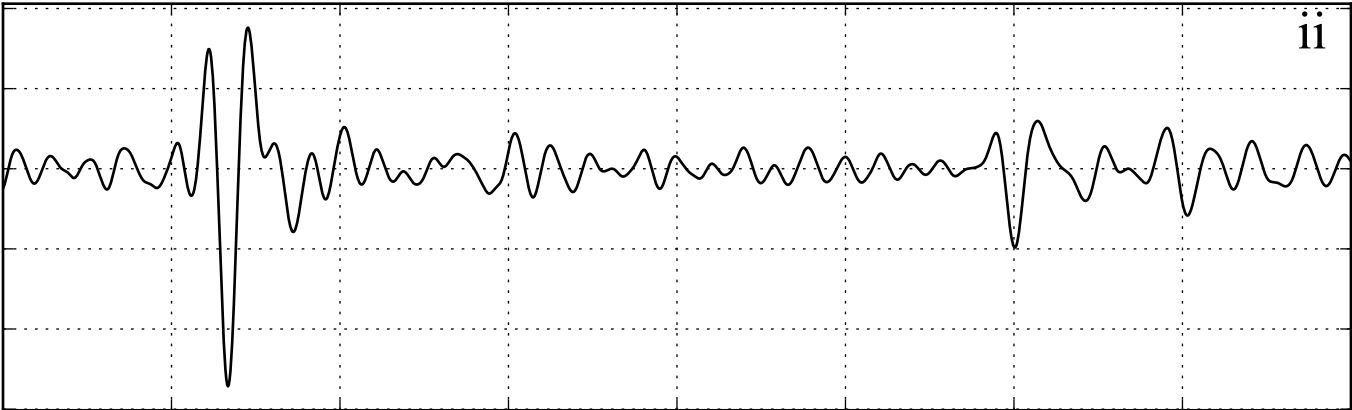

Time [s]

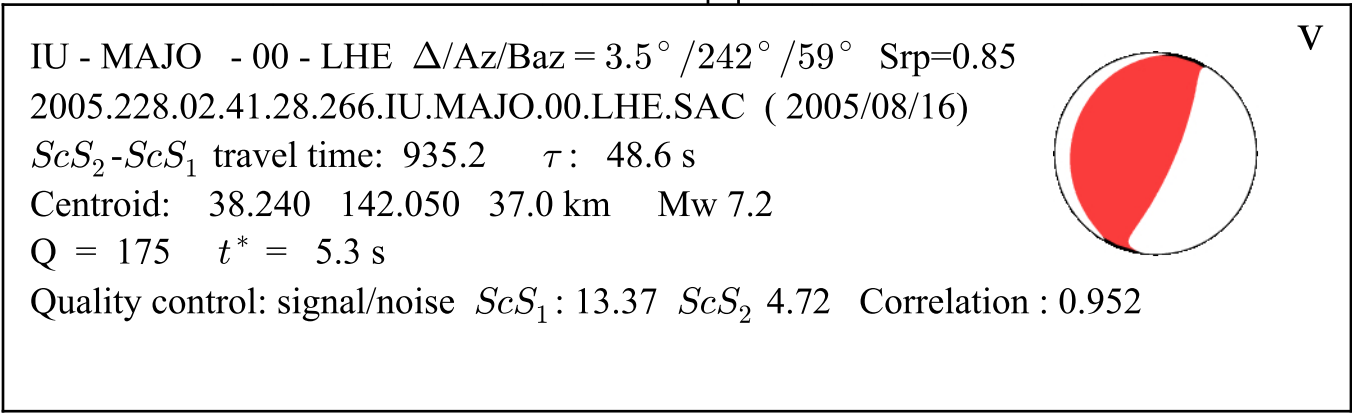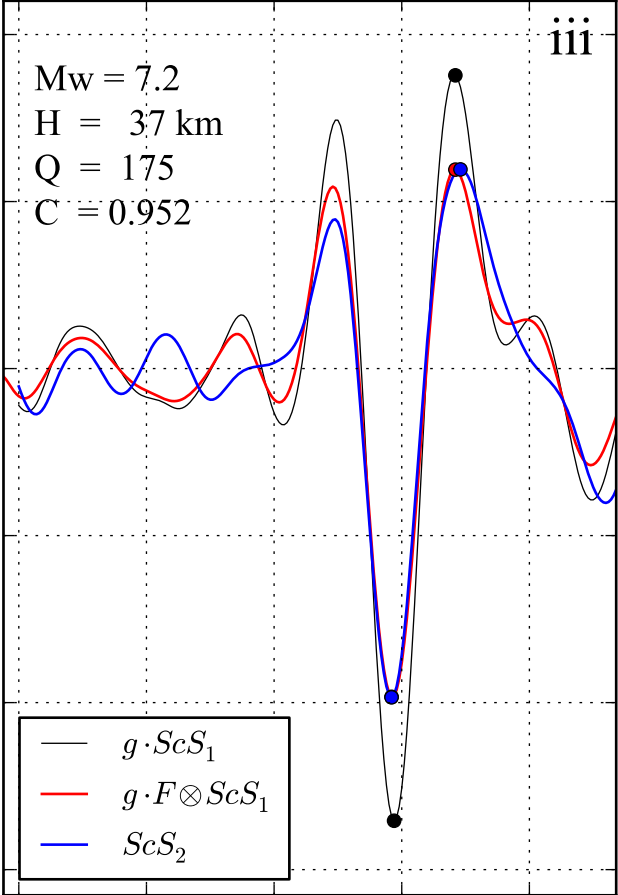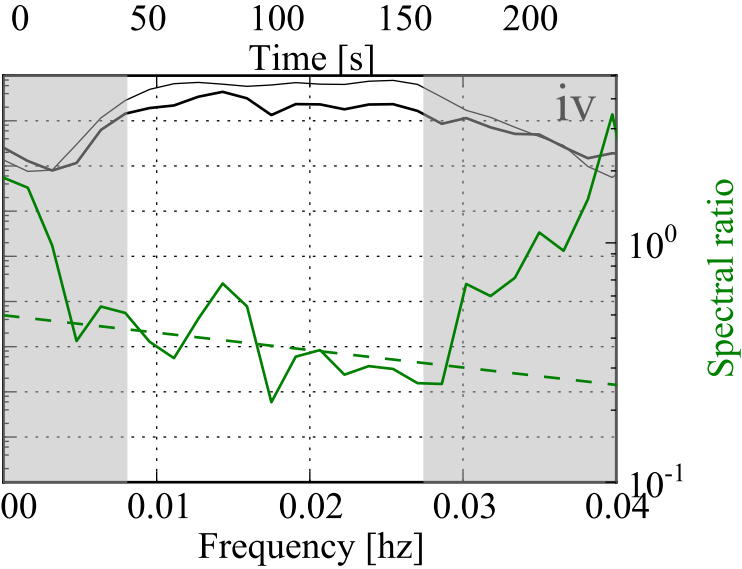

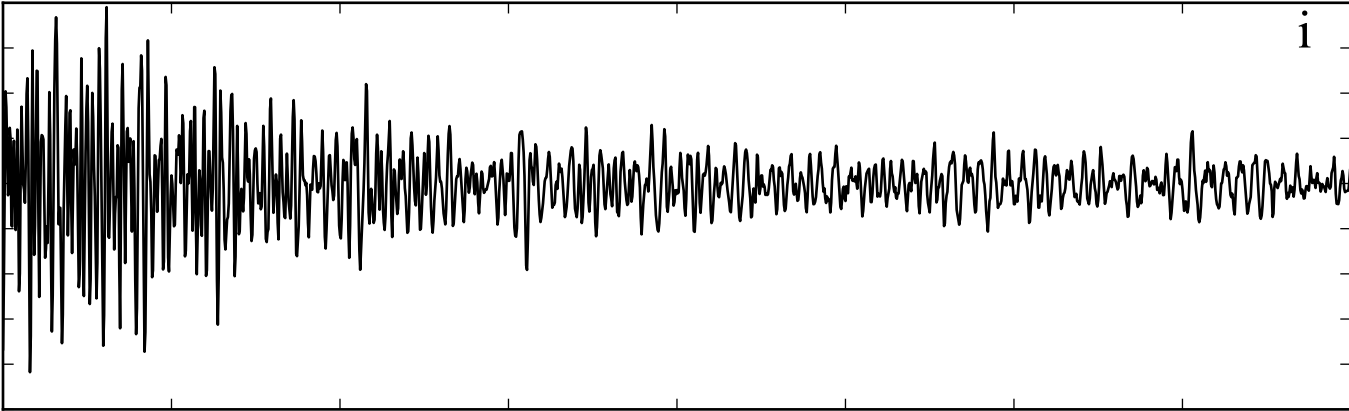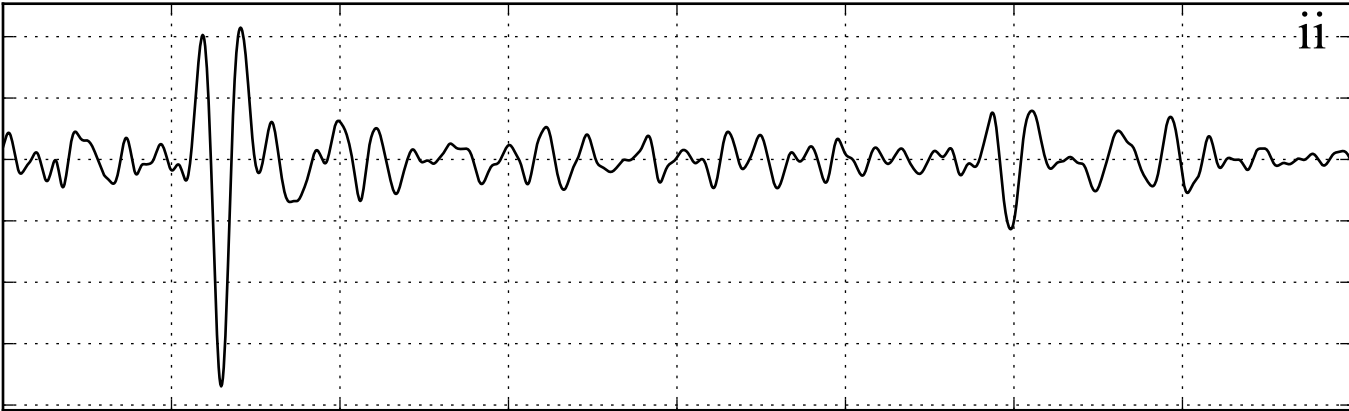

Time [s]

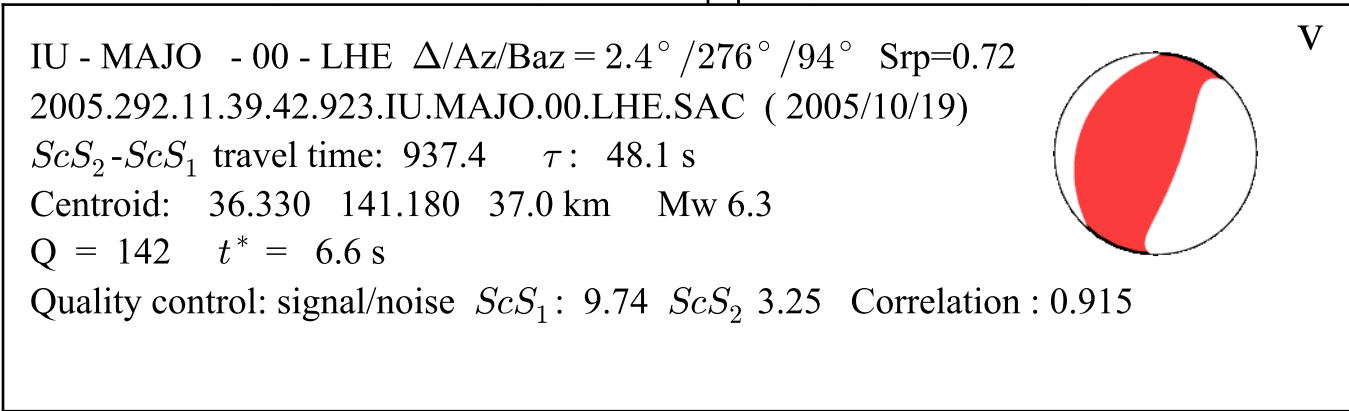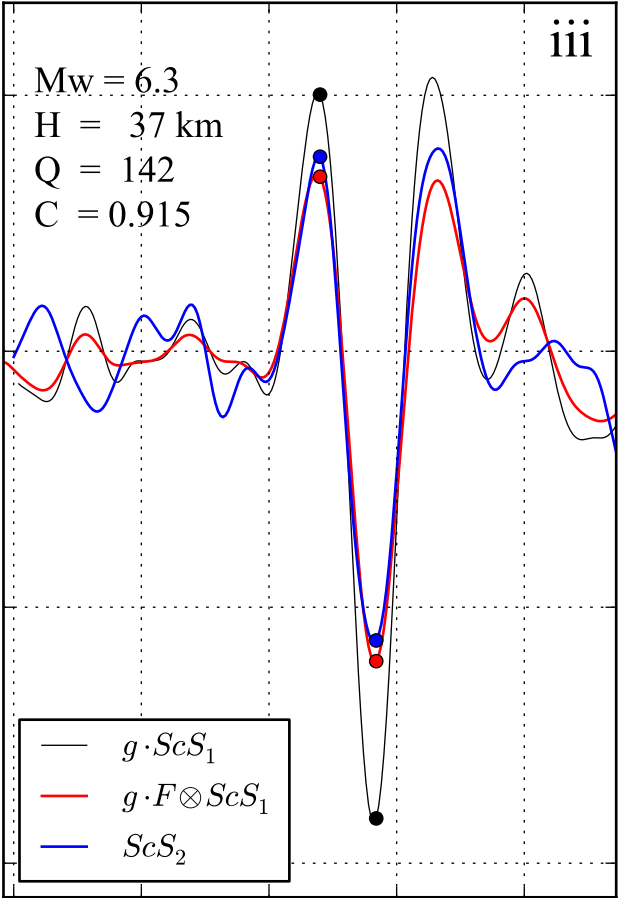

Time [s]

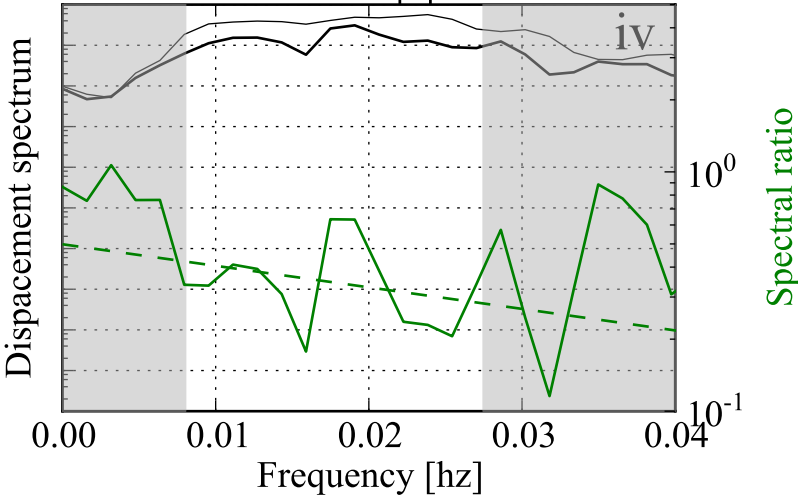

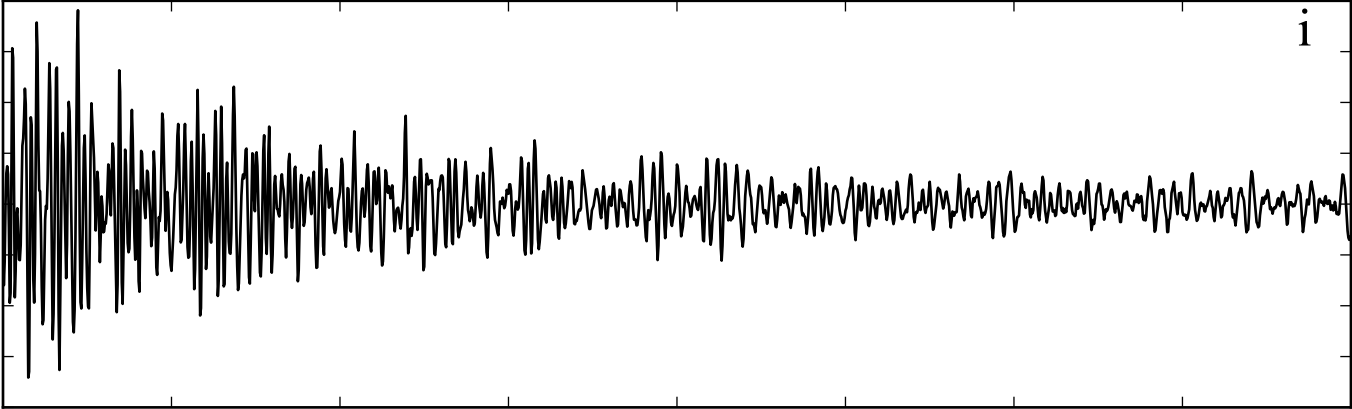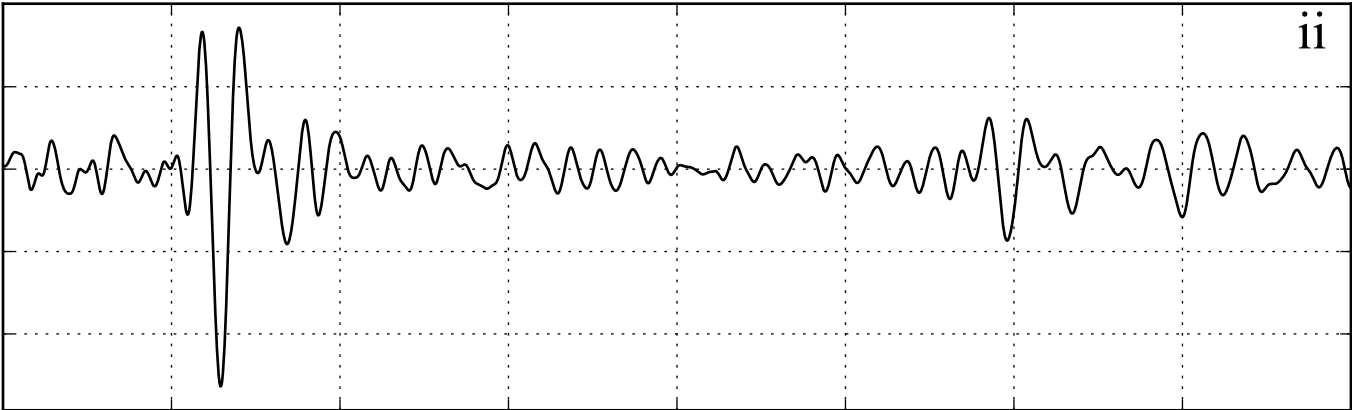

Time [s]

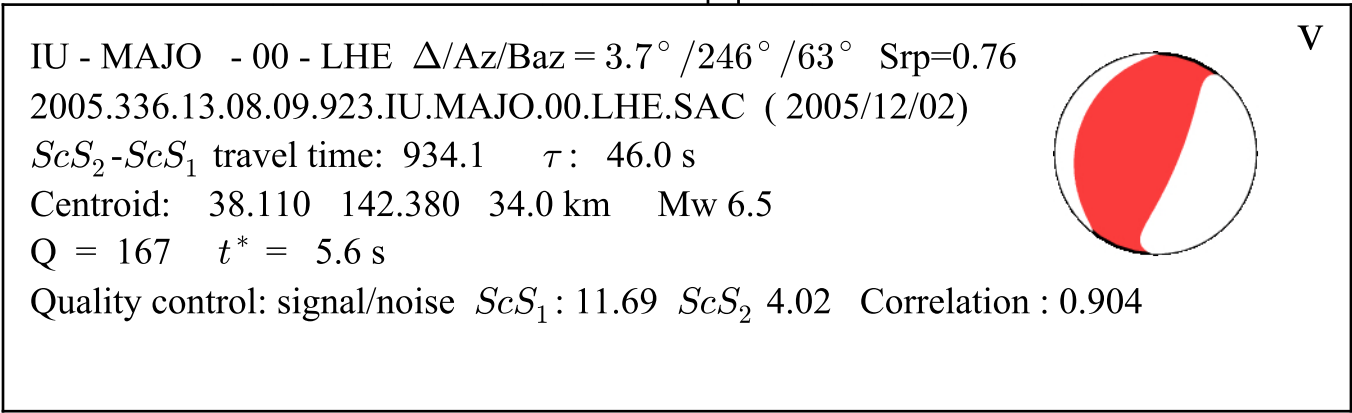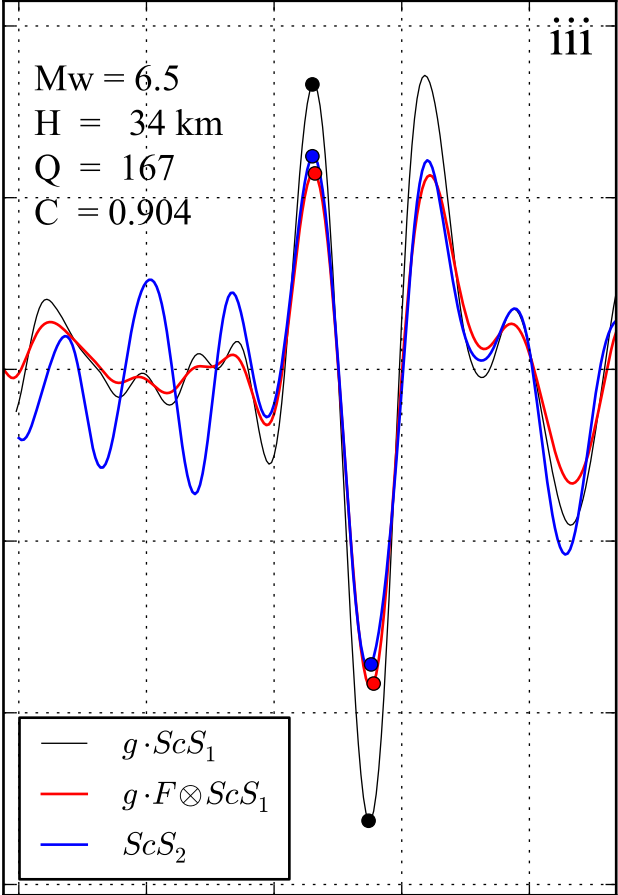

Time [s]

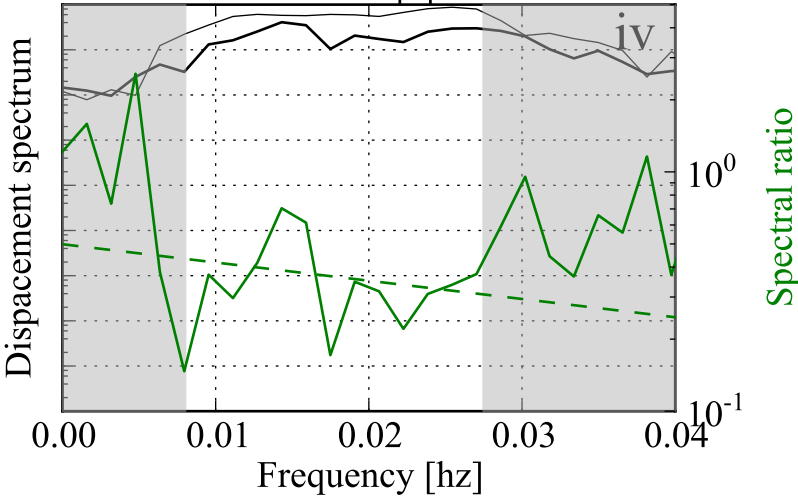

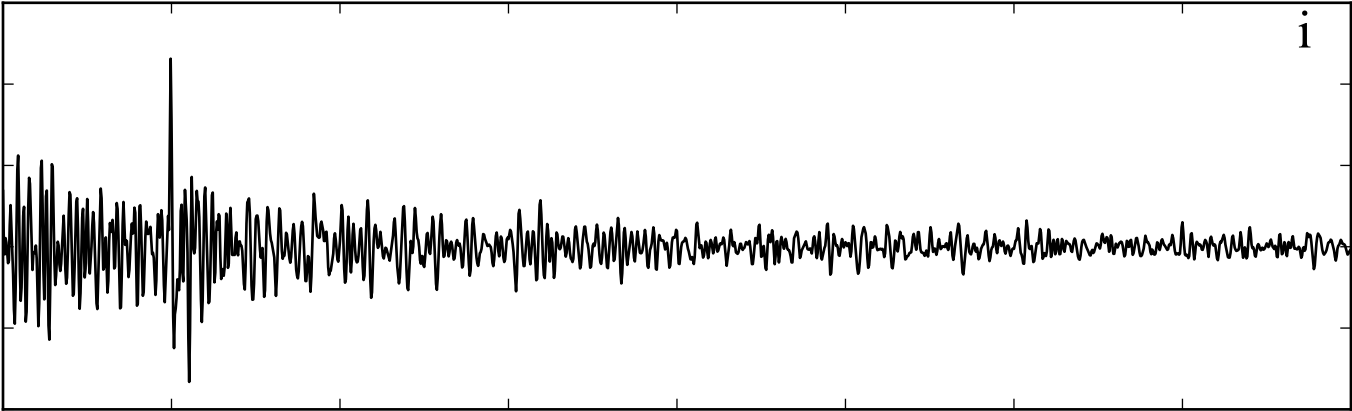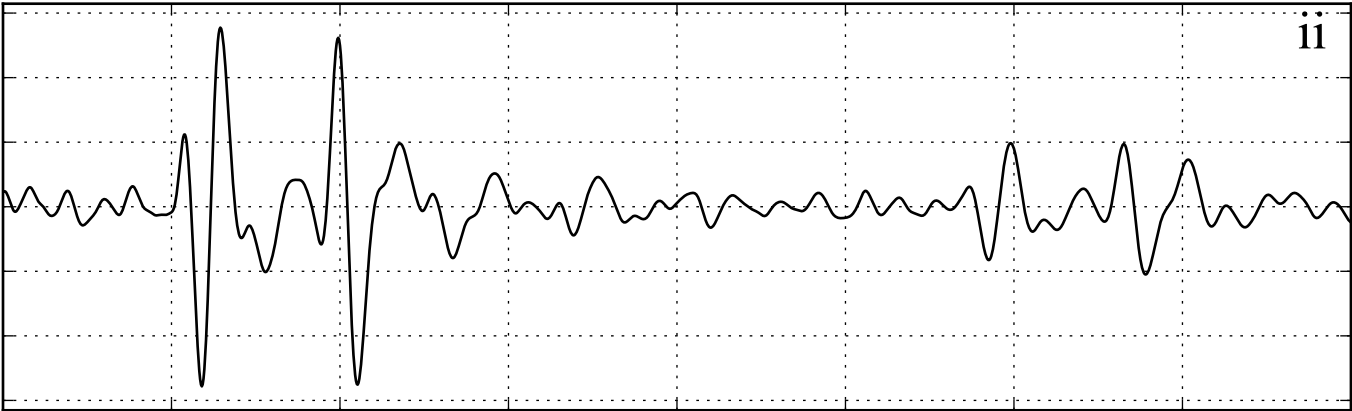

Time [s]

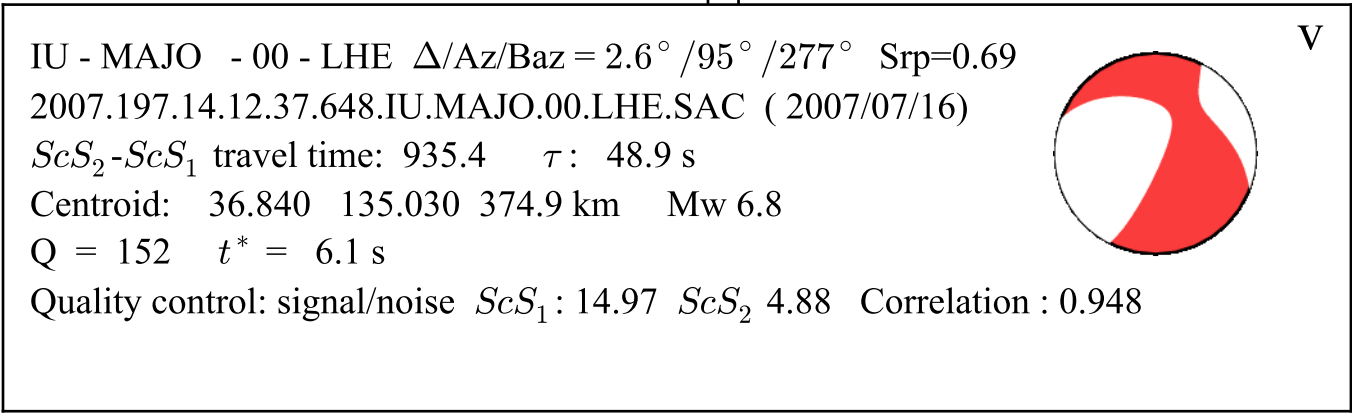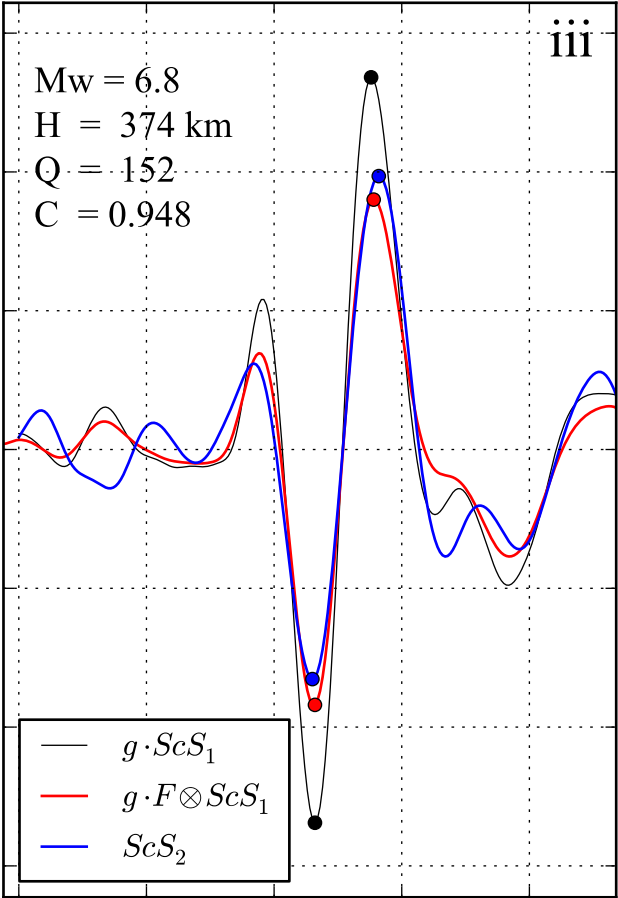

Time [s]

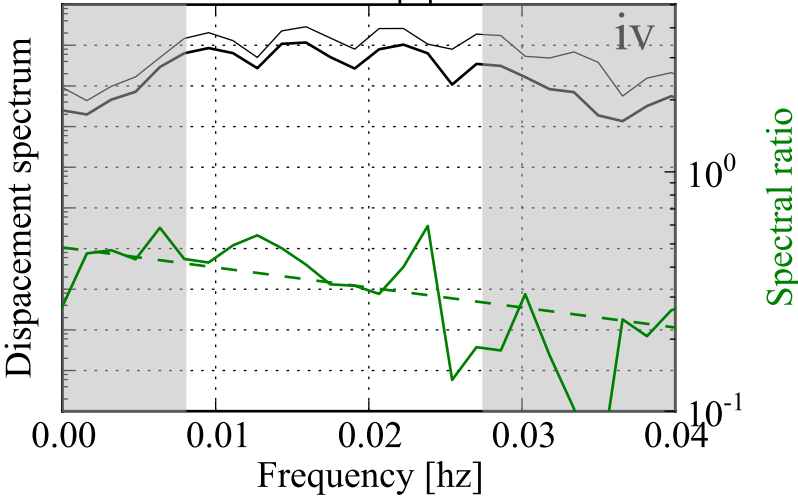

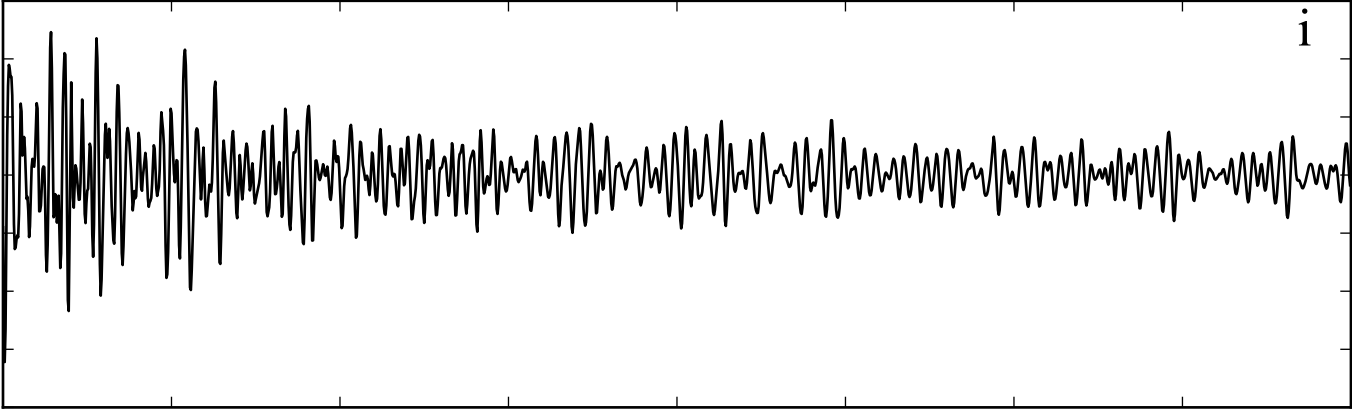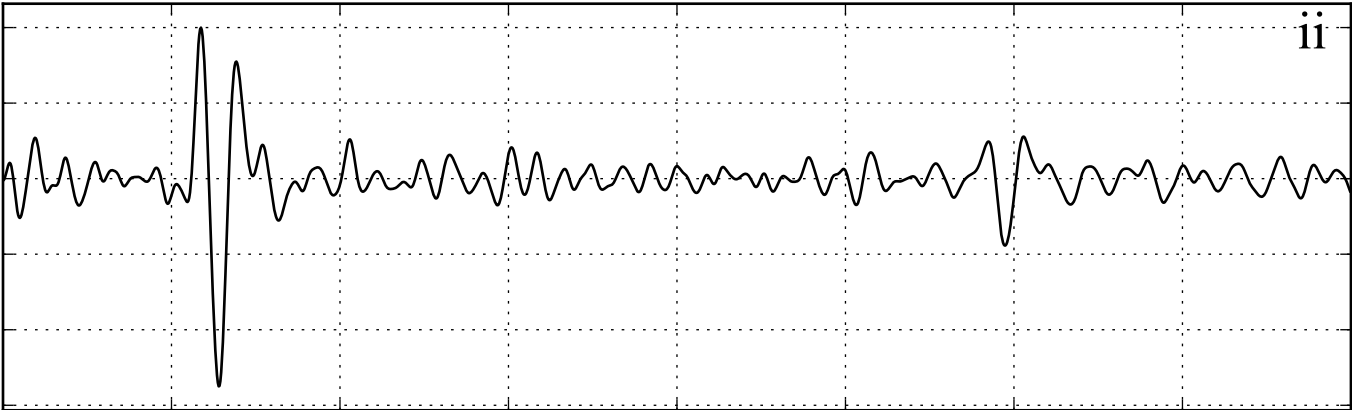

Time [s]

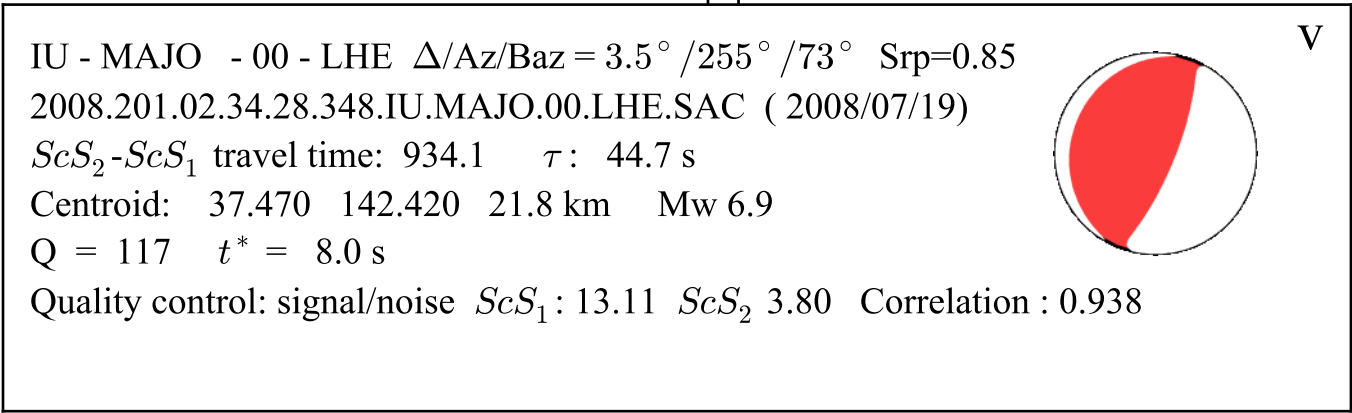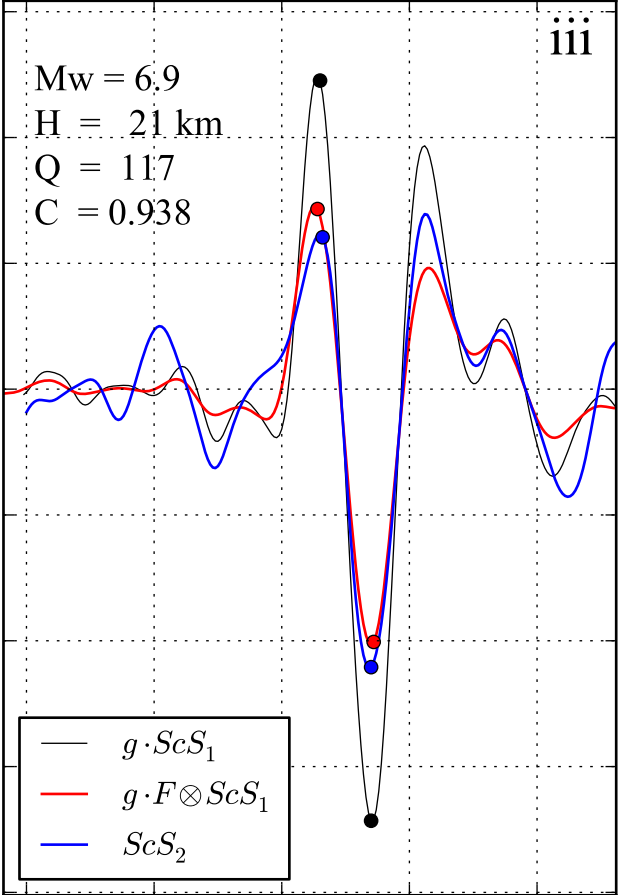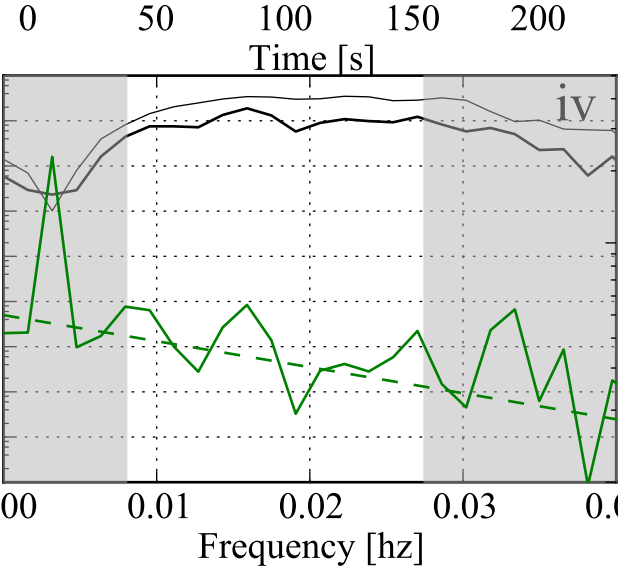

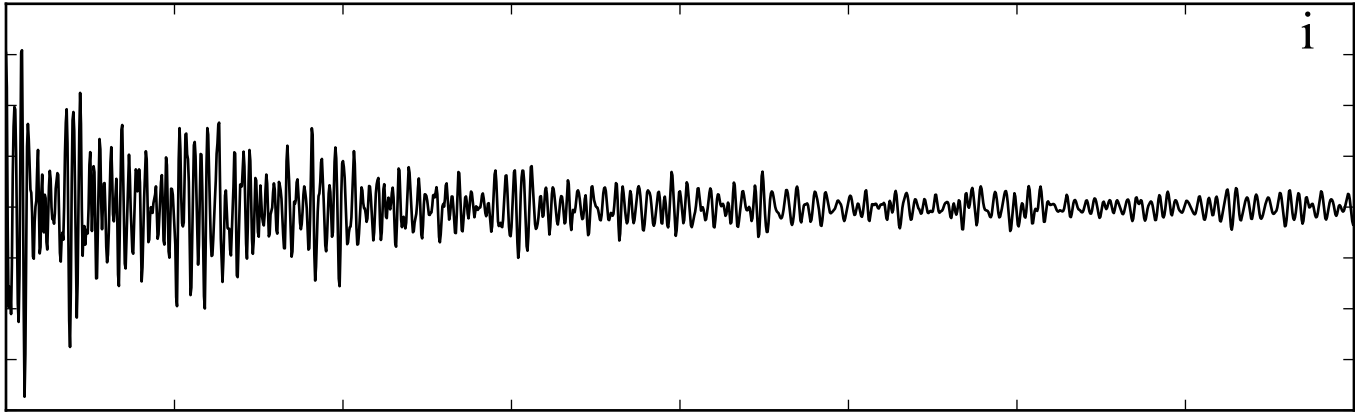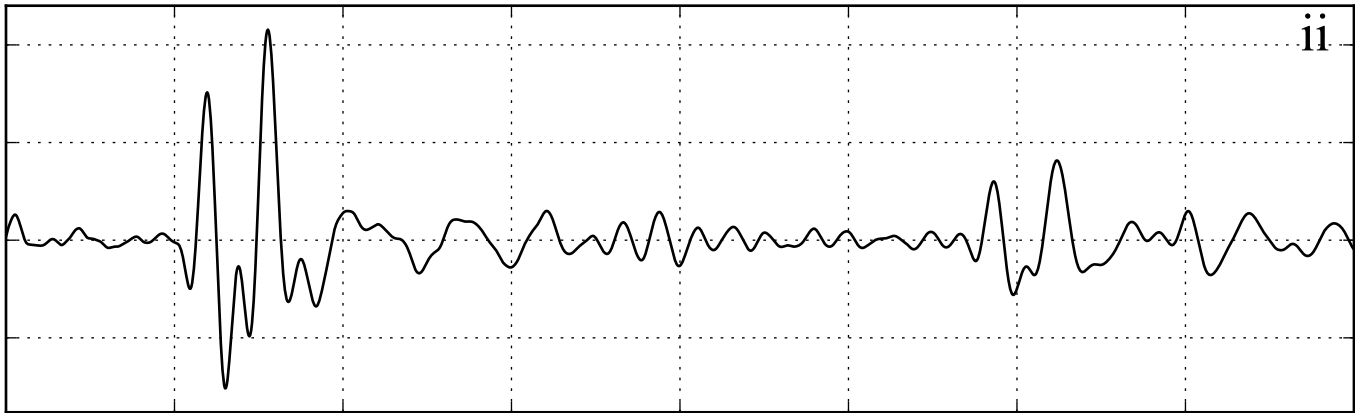

Time [s]

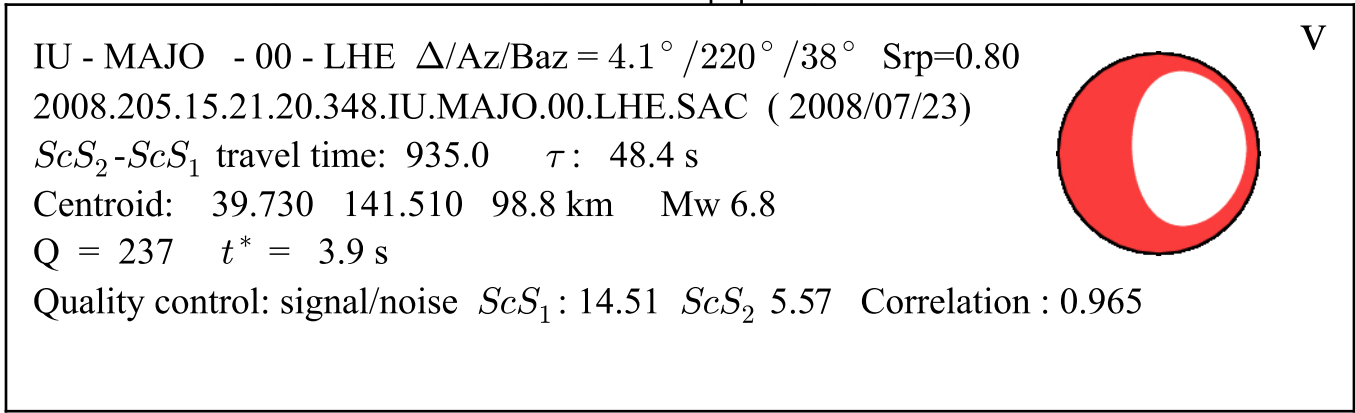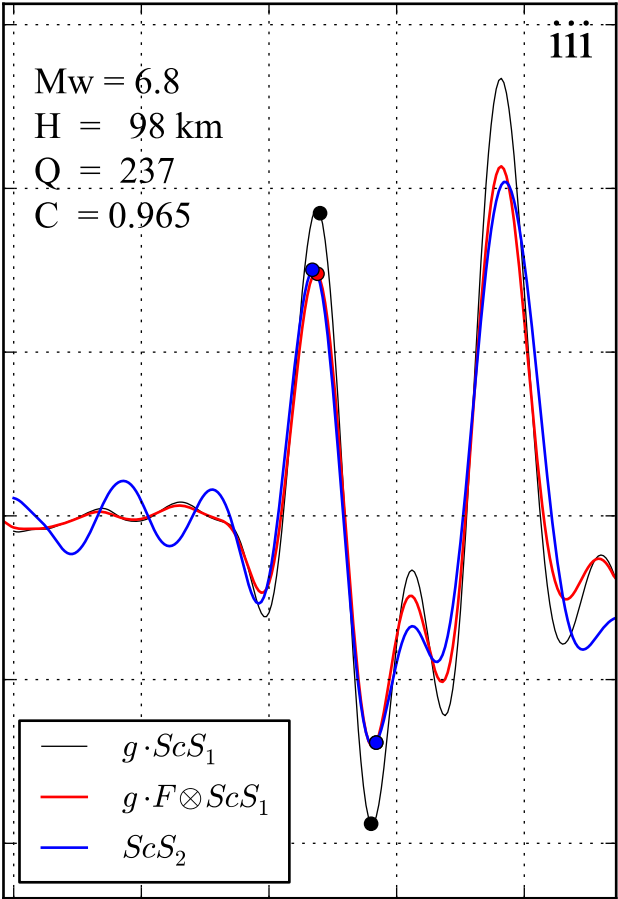

Time [s]

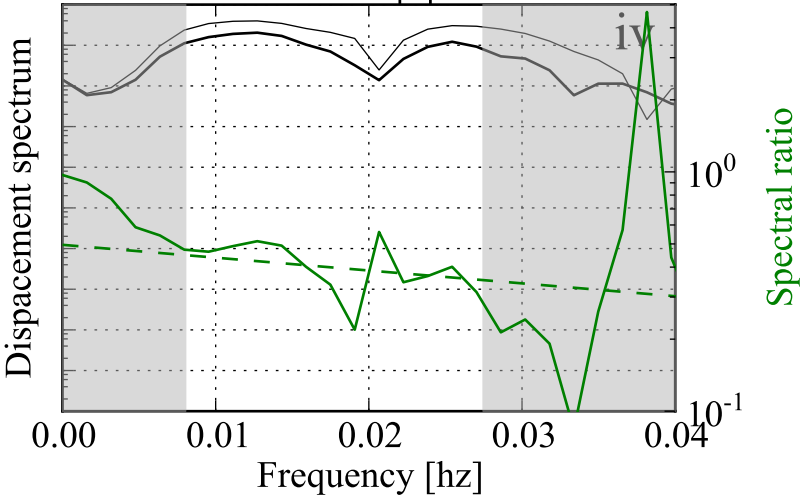



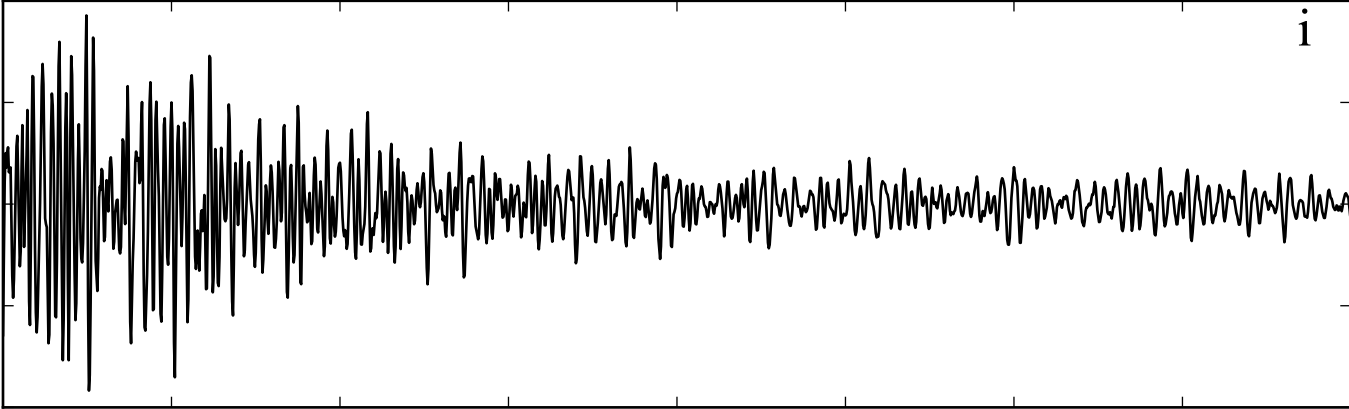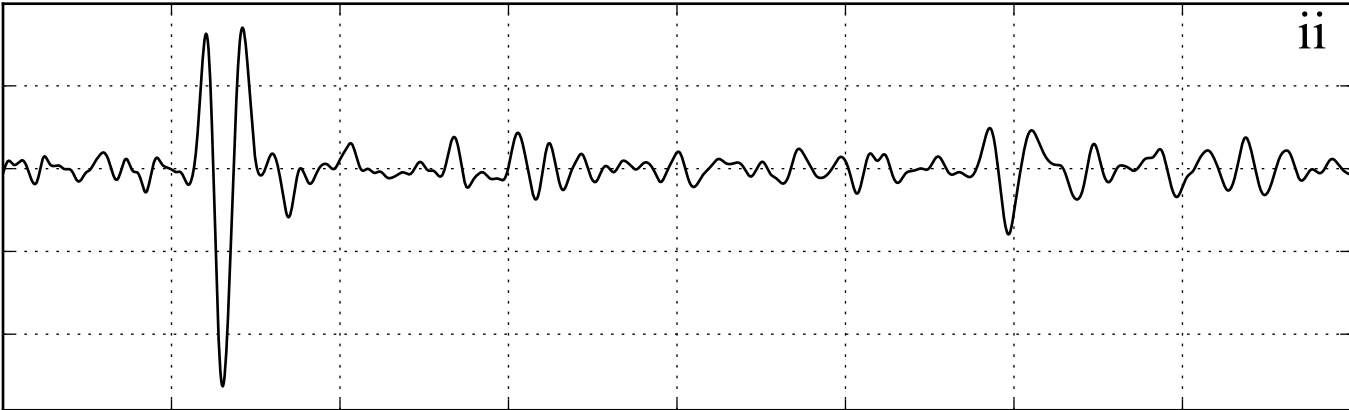

Time [s]

IU - MAJO - 00 - LH2  $\Delta/Az/Baz = 3.2^\circ/250^\circ/67^\circ$   $Srp=0.67$

2010.073.08.03.04.069.IU.MAJO.00.LH2.SAC (2010/03/14)

$ScS_2$ - $ScS_1$  travel time: 933.2  $\tau$ : 46.3 s

Centroid: 37.700 141.980 45.9 km Mw 6.5

$Q = 117$   $t^* = 7.9$  s

Quality control: signal/noise  $ScS_1$ : 12.51  $ScS_2$  3.76 Correlation : 0.936

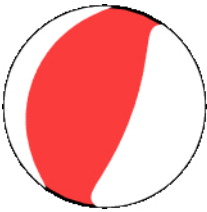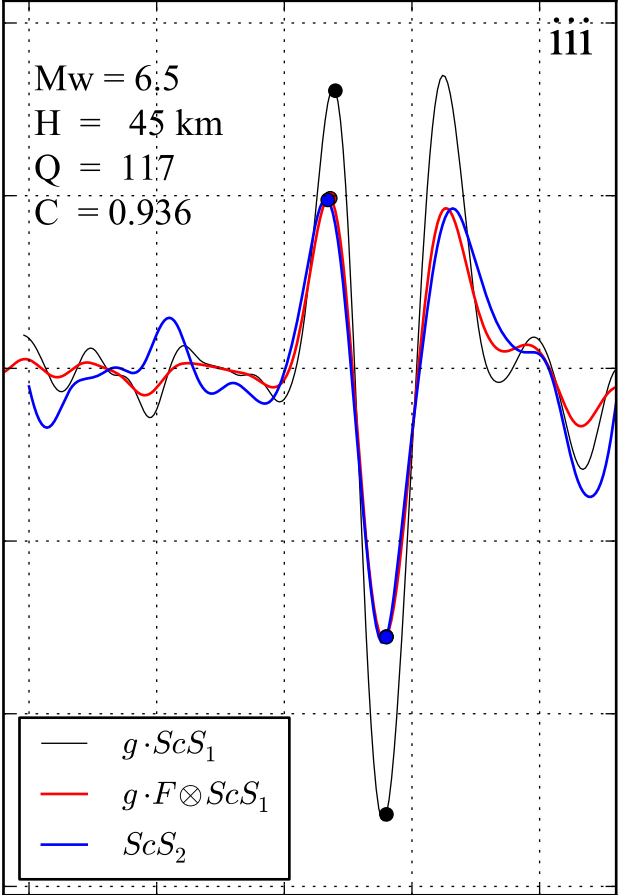

Time [s]

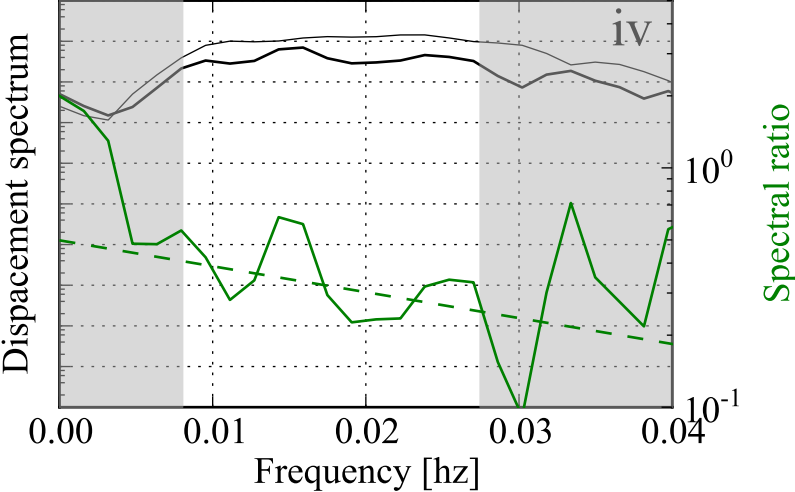

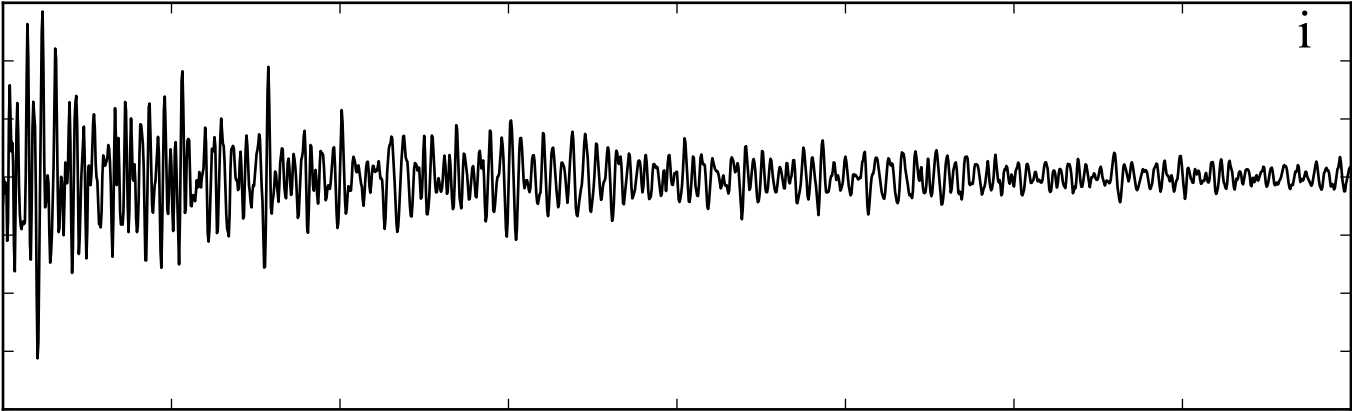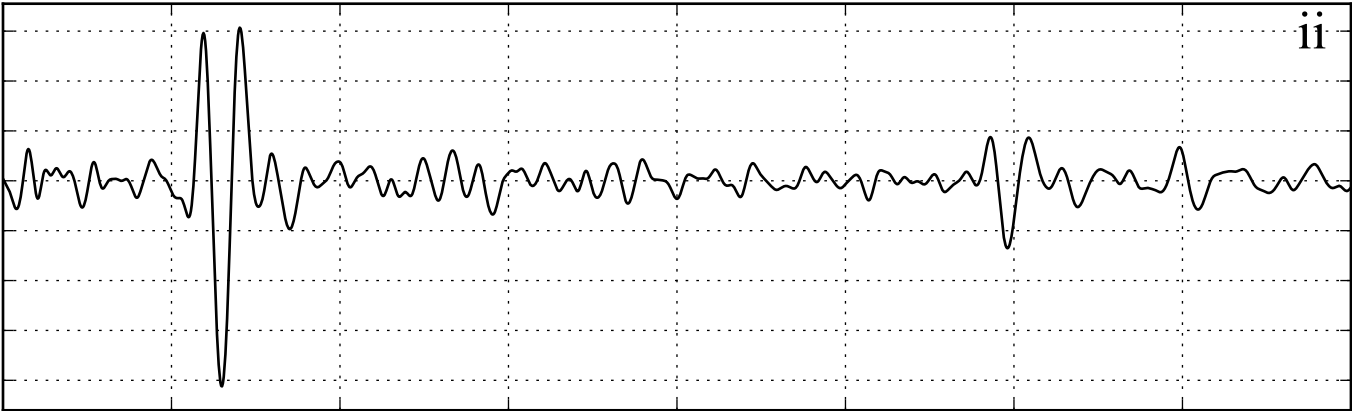

Time [s]

IU - MAJO - 00 - LH2  $\Delta/Az/Baz = 4.8^\circ/230^\circ/47^\circ$   $Srp=0.72$

2010.185.21.50.52.069.IU.MAJO.00.LH2.SAC ( 2010/07/04)

$ScS_2$ - $ScS_1$  travel time: 933.8  $\tau$ : 45.3 s

Centroid: 39.680 142.770 35.3 km Mw 6.3

$Q = 133$   $t^* = 7.0$  s

Quality control: signal/noise  $ScS_1$ : 16.22  $ScS_2$  5.14 Correlation : 0.955

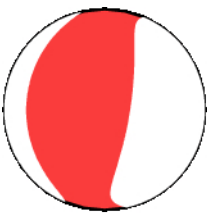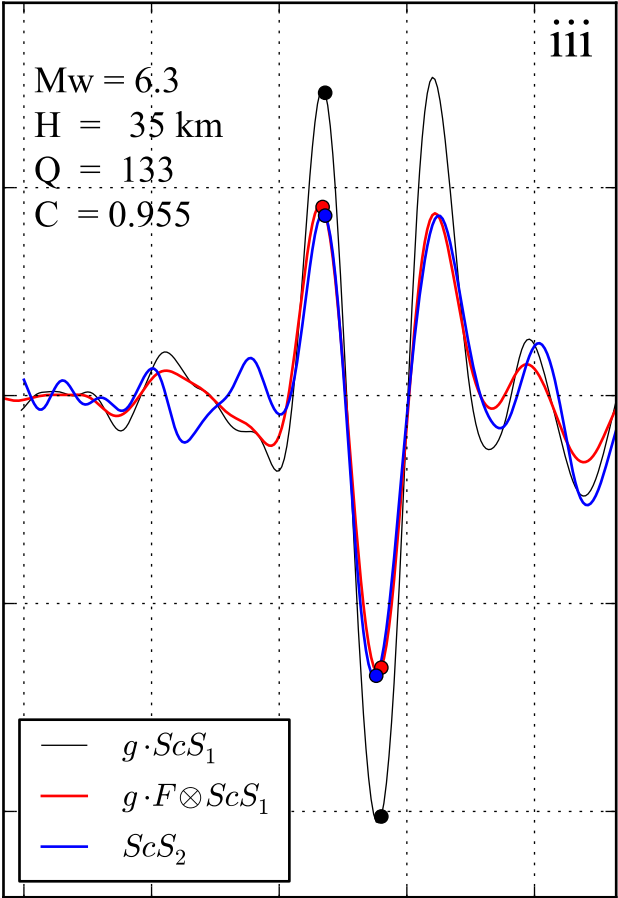

Time [s]

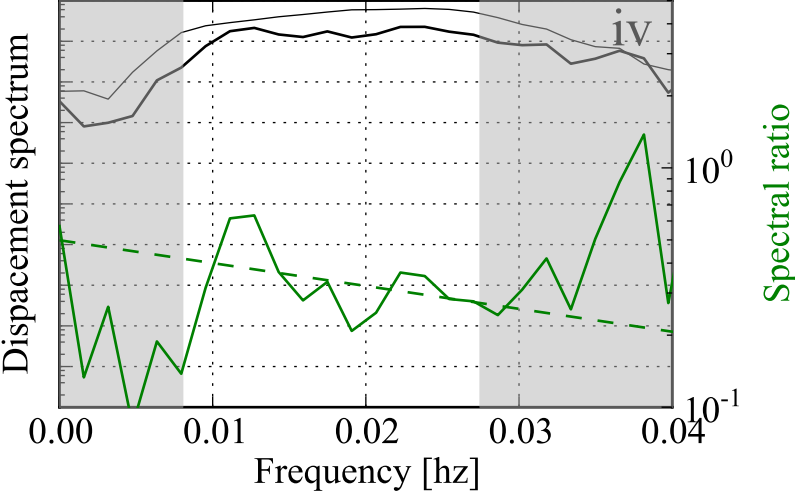

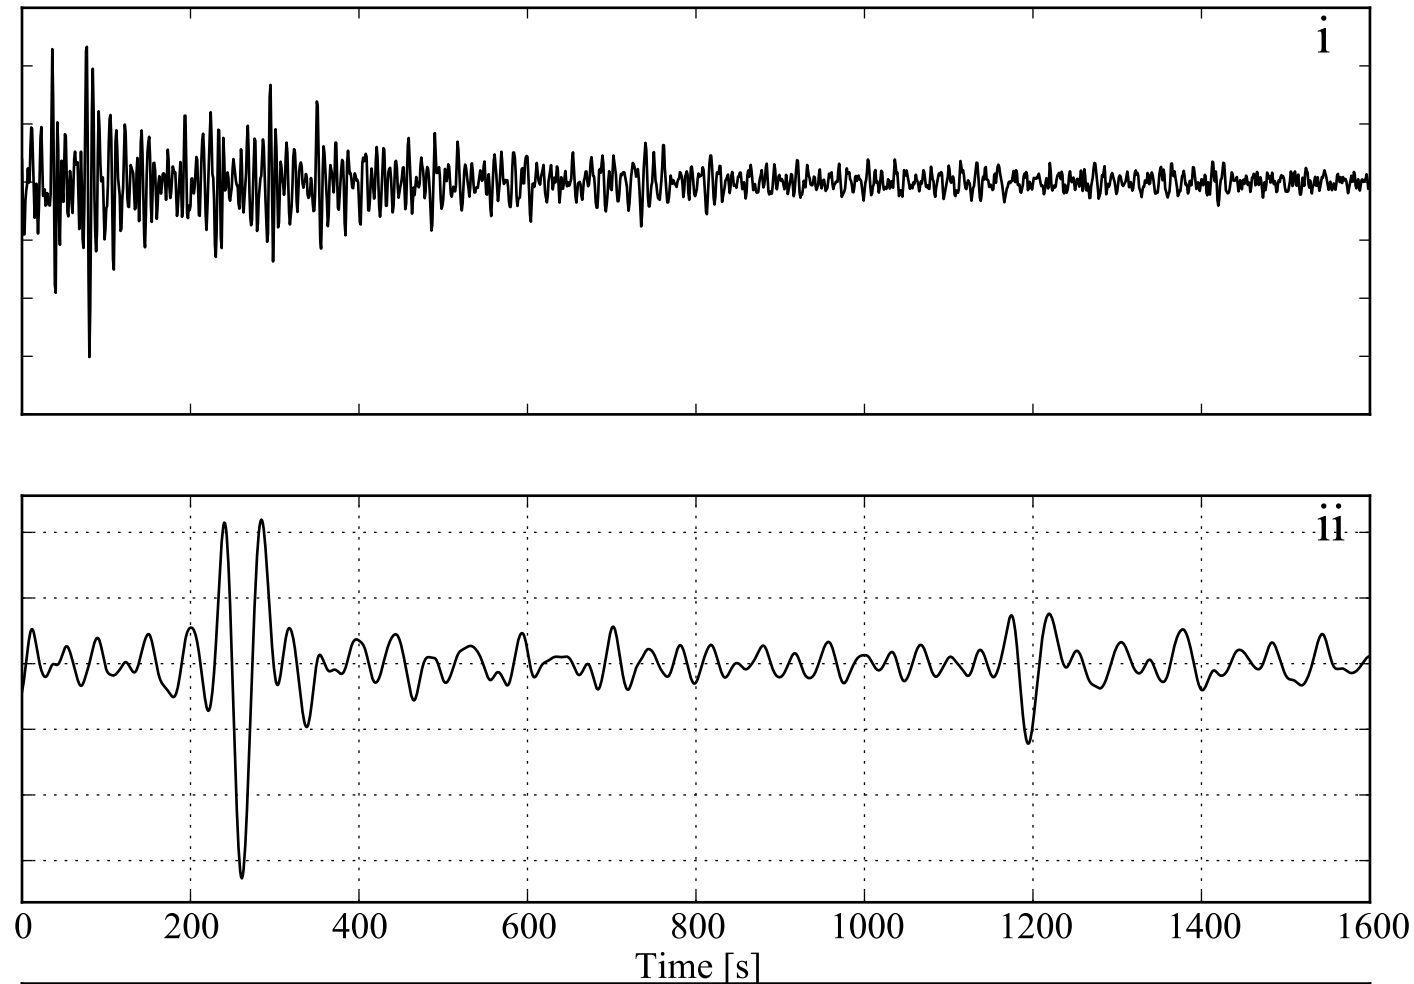

IU - MAJO - 00 - LH2  $\Delta/Az/Baz = 3.9^\circ / 235^\circ / 53^\circ$   $Srp=0.68$   
 2011.084.11.31.24.069.IU.MAJO.00.LH2.SAC ( 2011/03/25)  
 $ScS_2$ - $ScS_1$  travel time: 934.1  $\tau$ : 45.3 s  
 Centroid: 38.780 142.170 45.9 km Mw 6.2  
 $Q = 200$   $t^* = 4.7$  s  
 Quality control: signal/noise  $ScS_1$ : 11.91  $ScS_2$  4.29 Correlation : 0.938

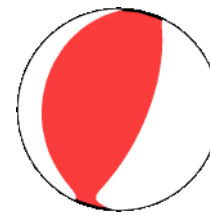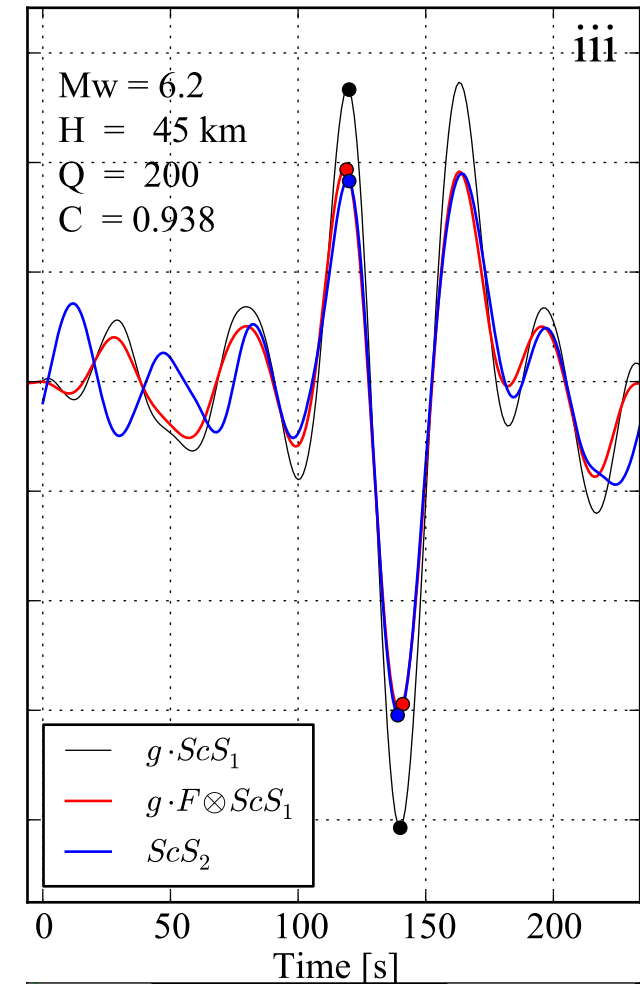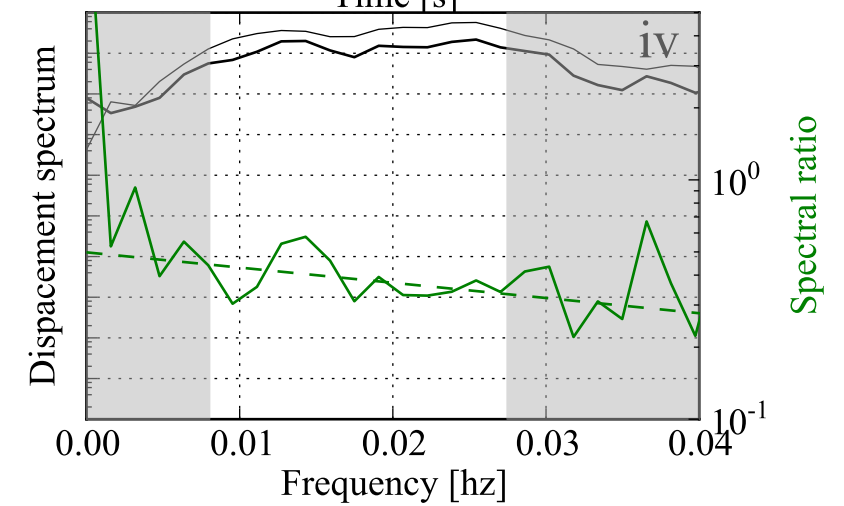

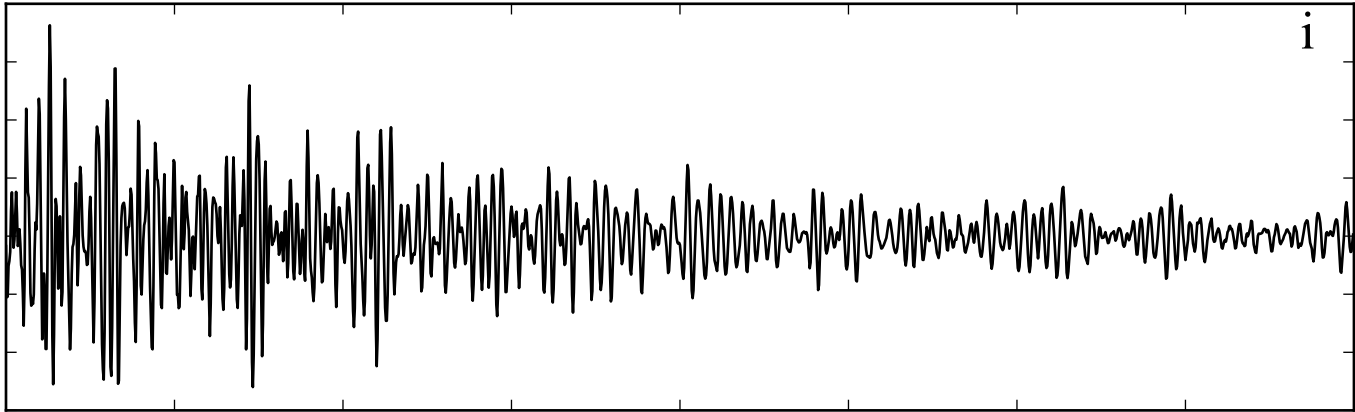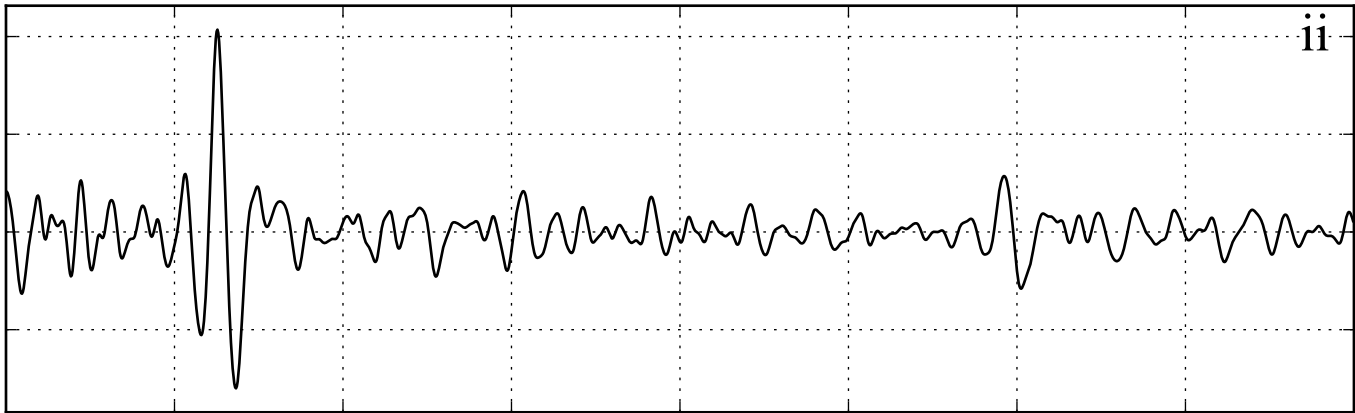

Time [s]

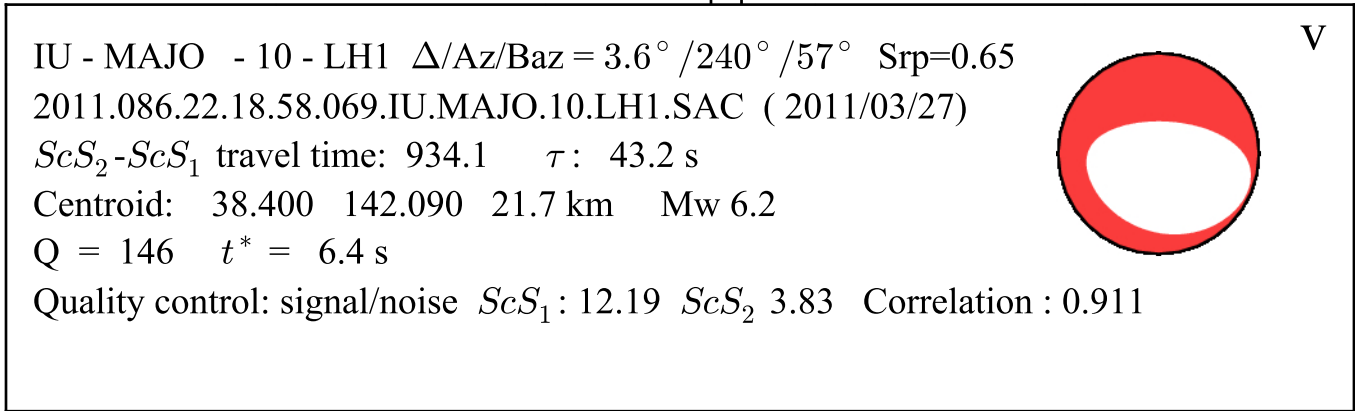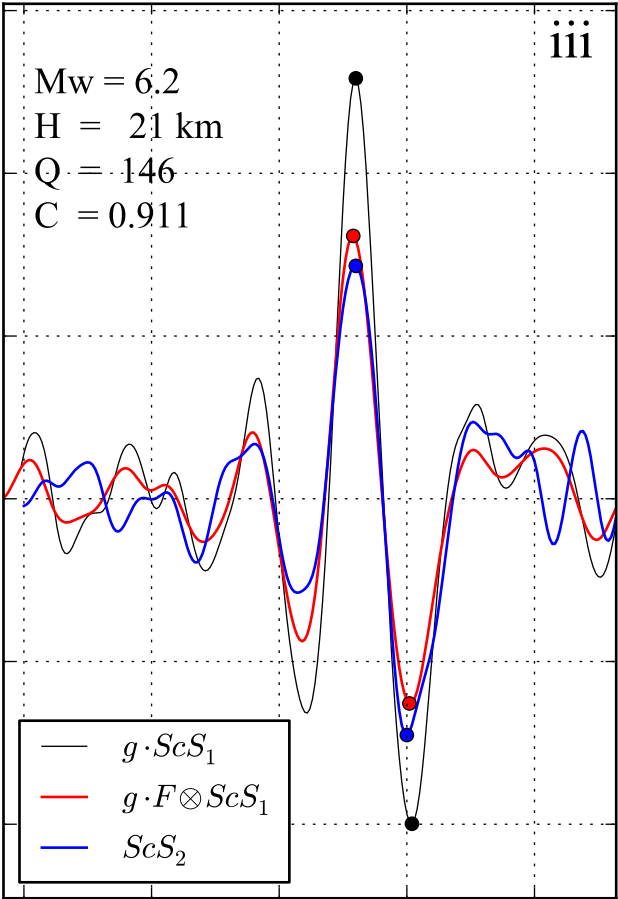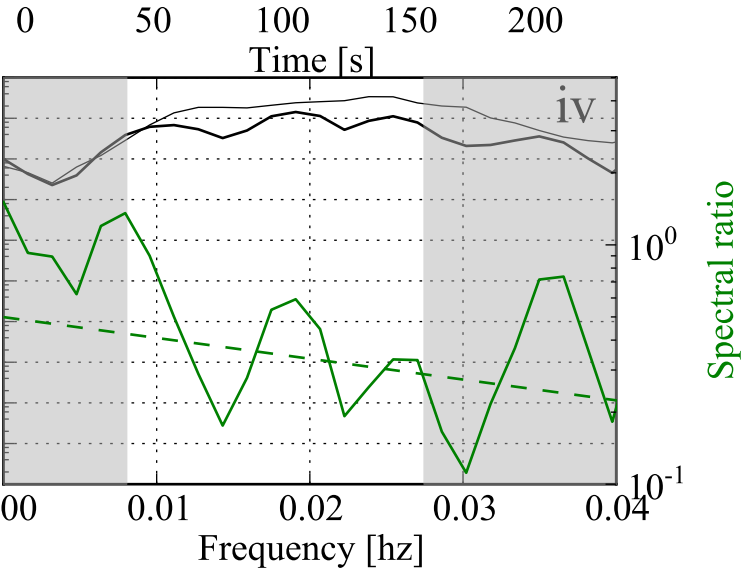

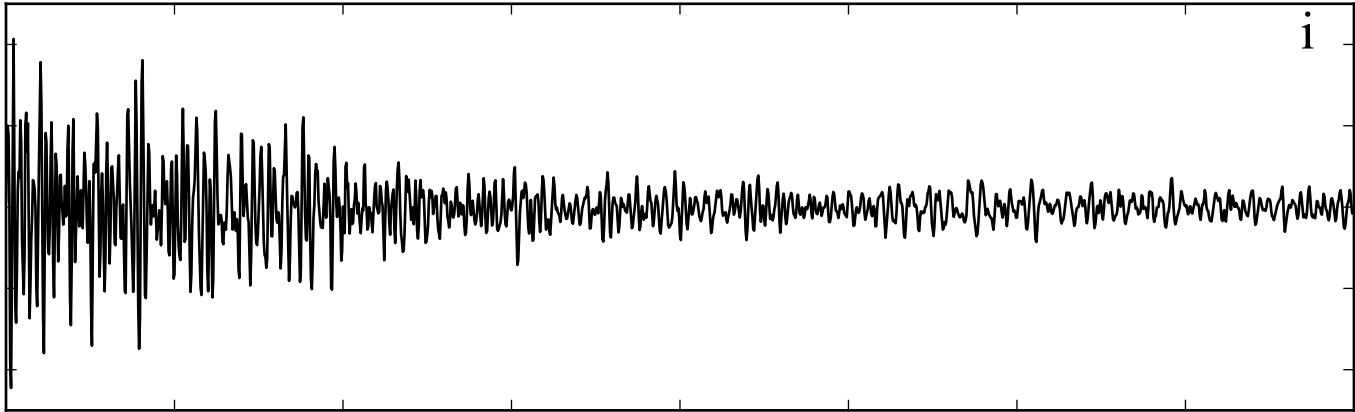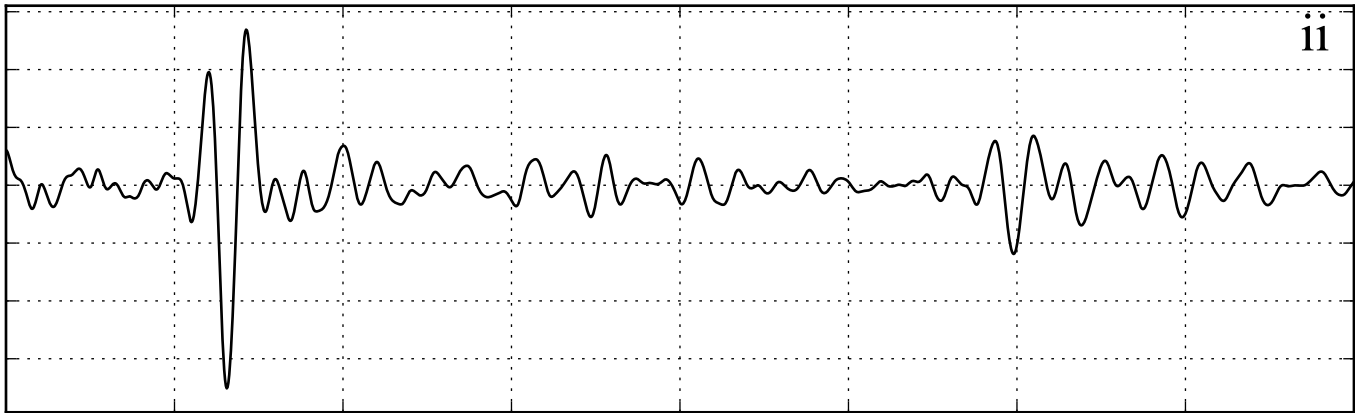

Time [s]

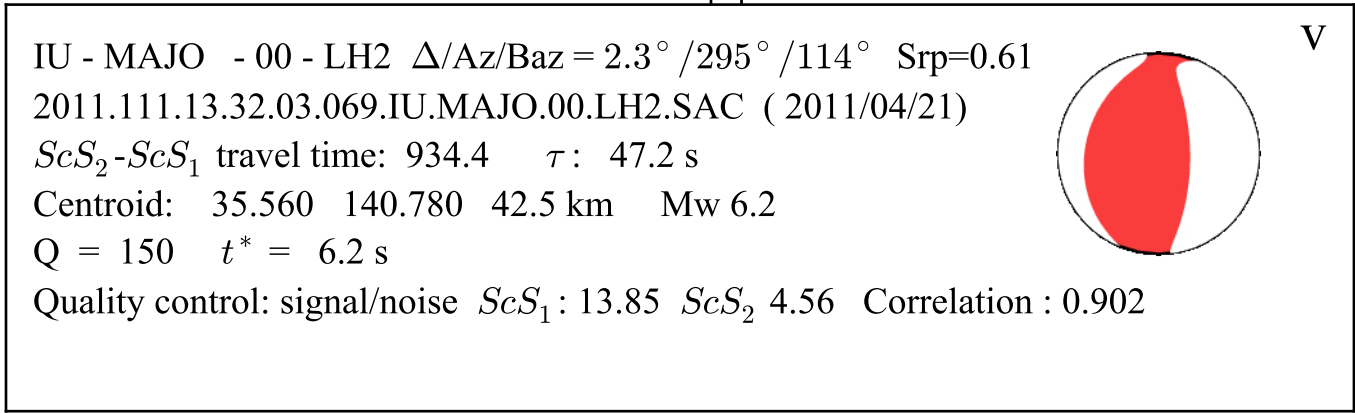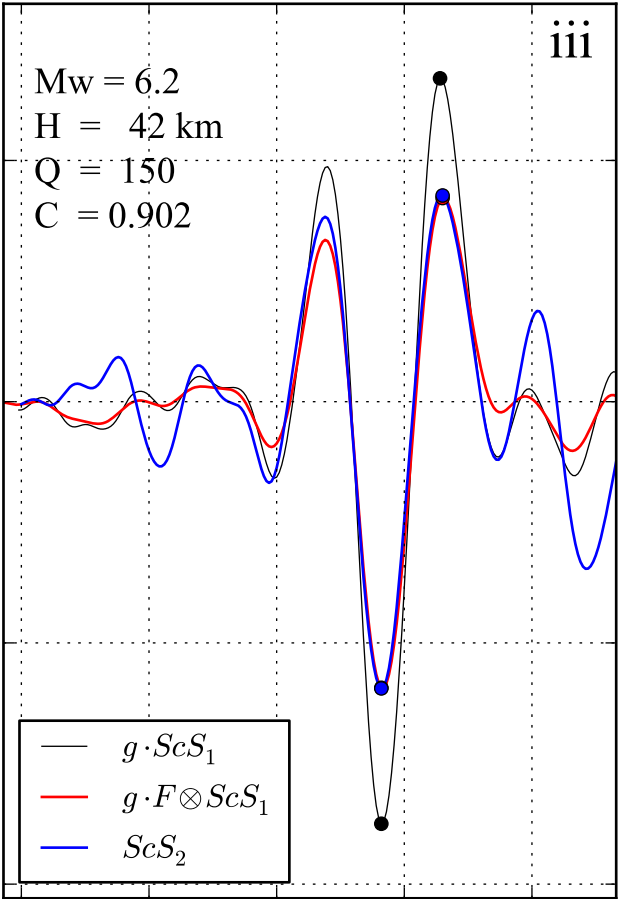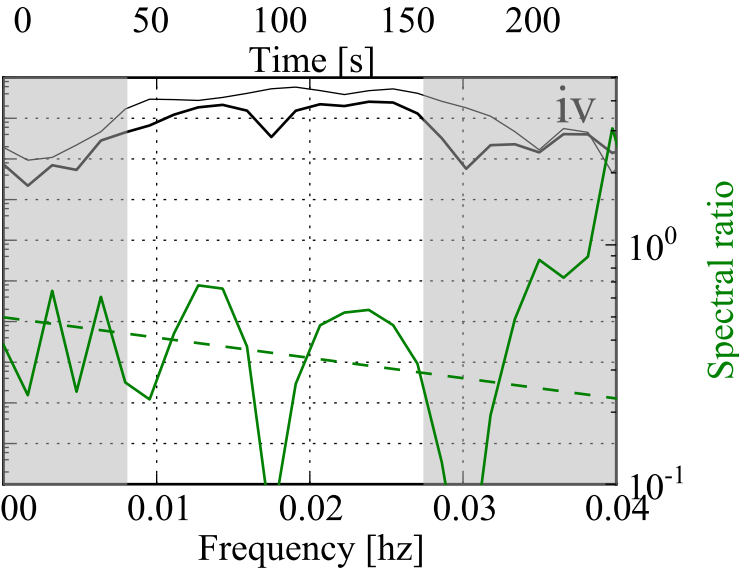

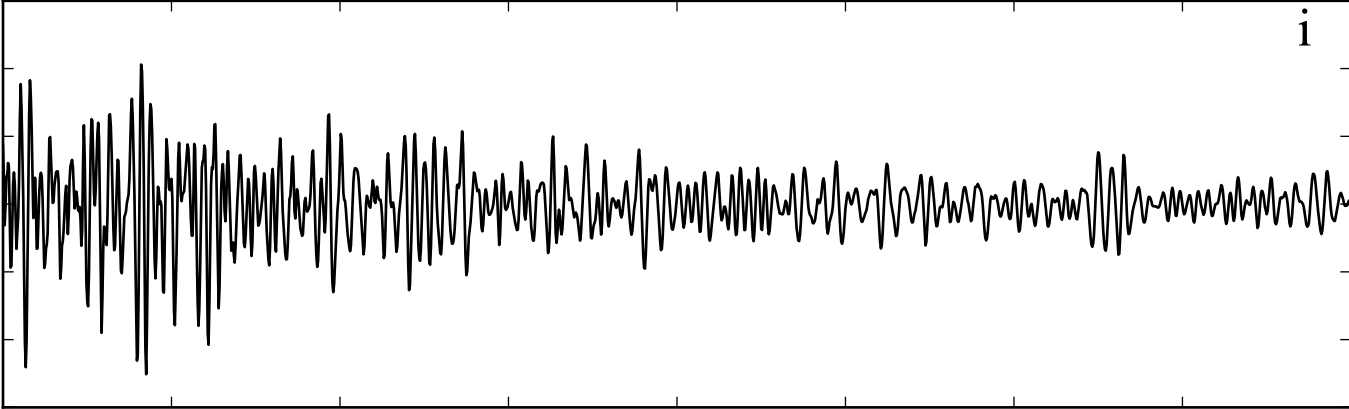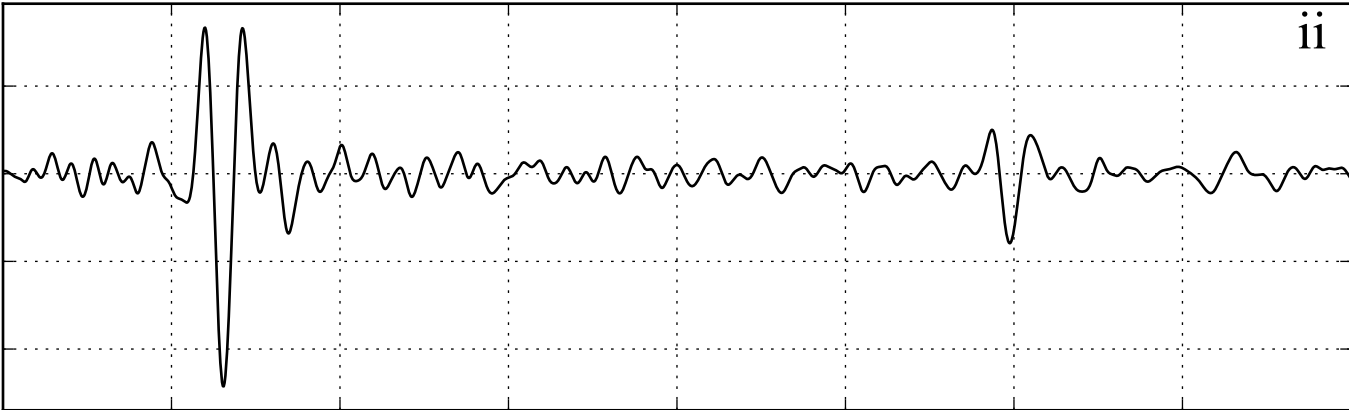

Time [s]

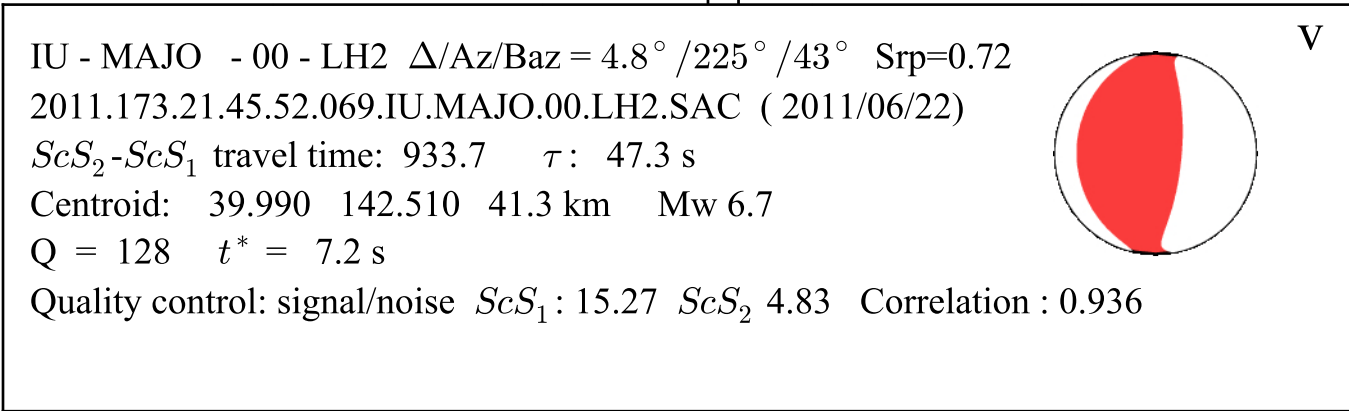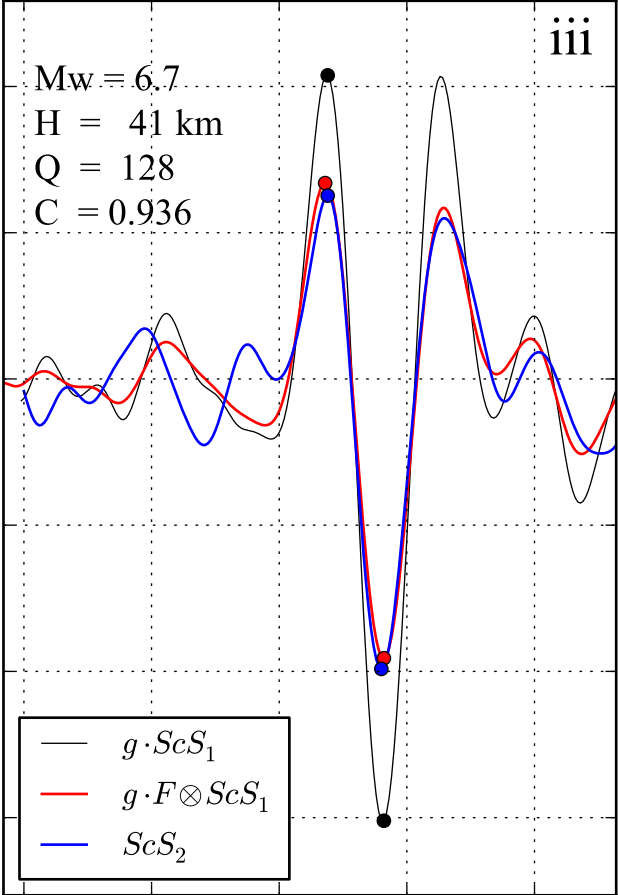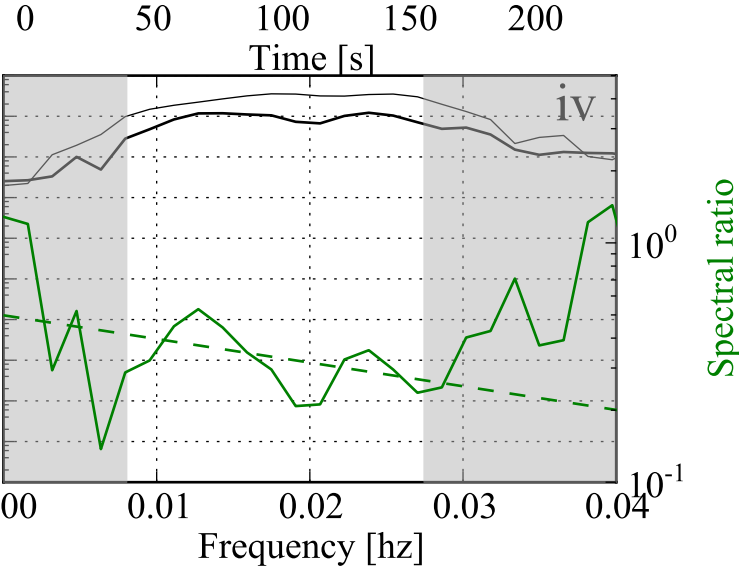

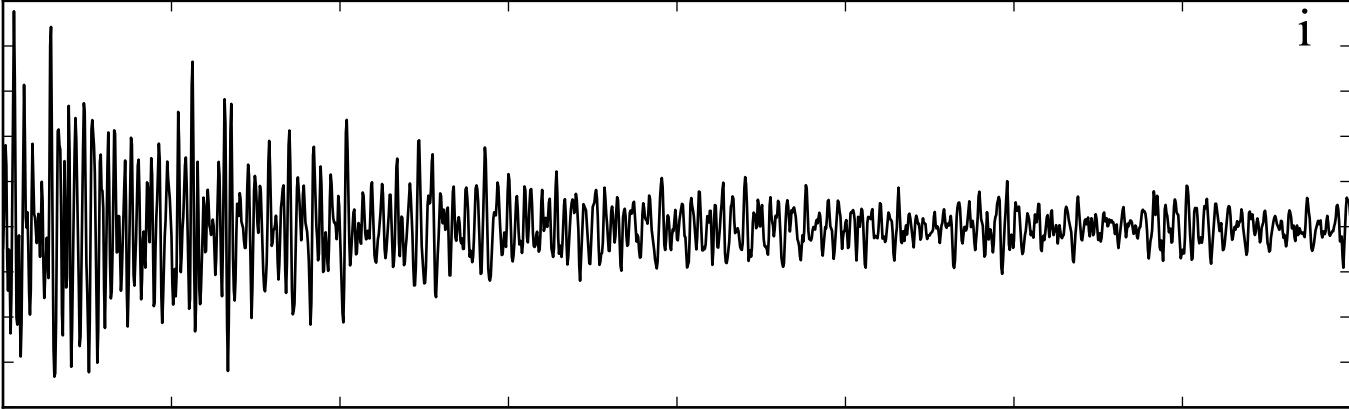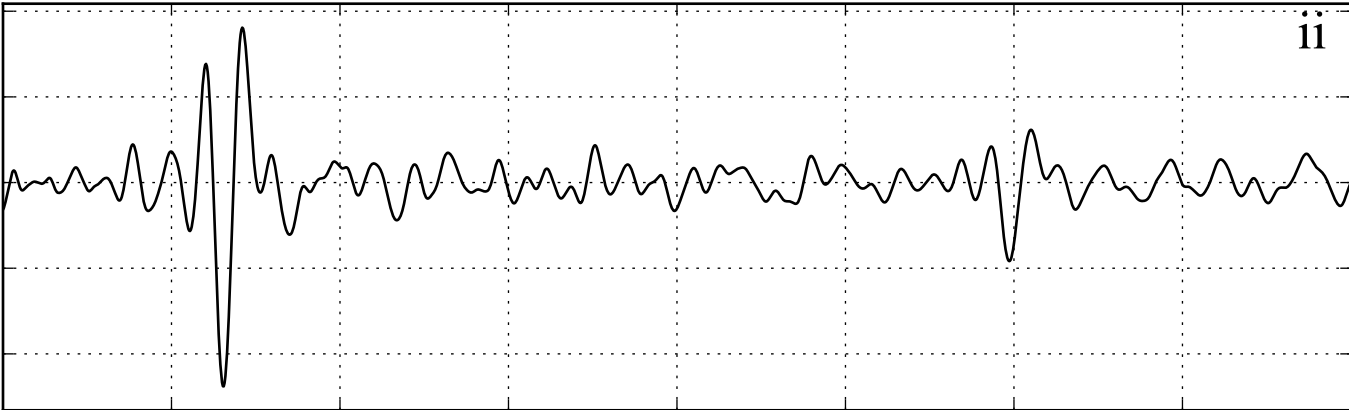

Time [s]

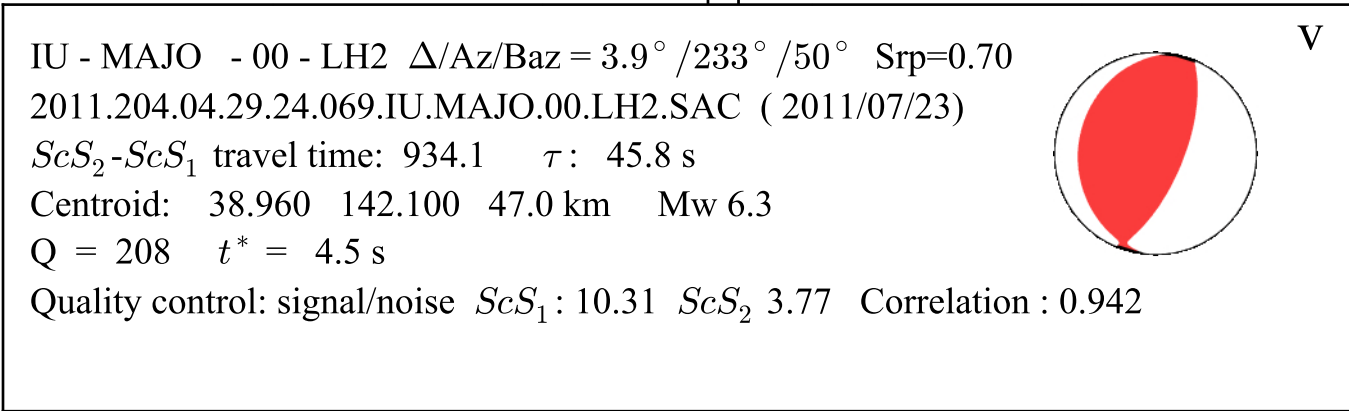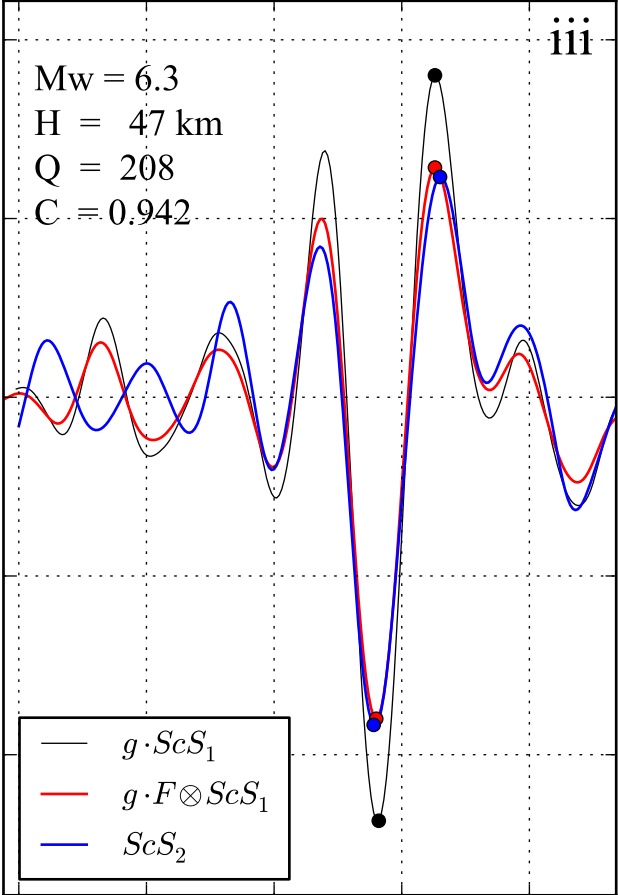

Time [s]

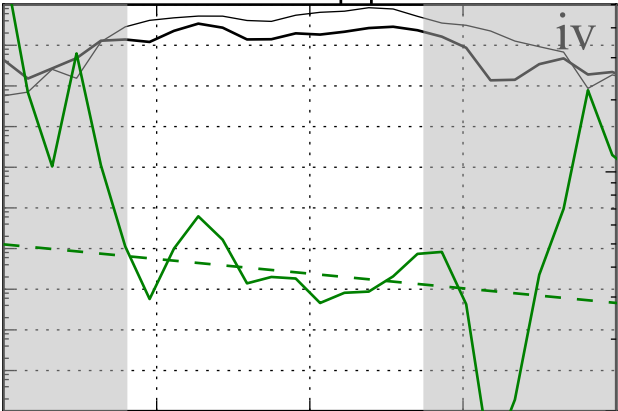

Frequency [hz]

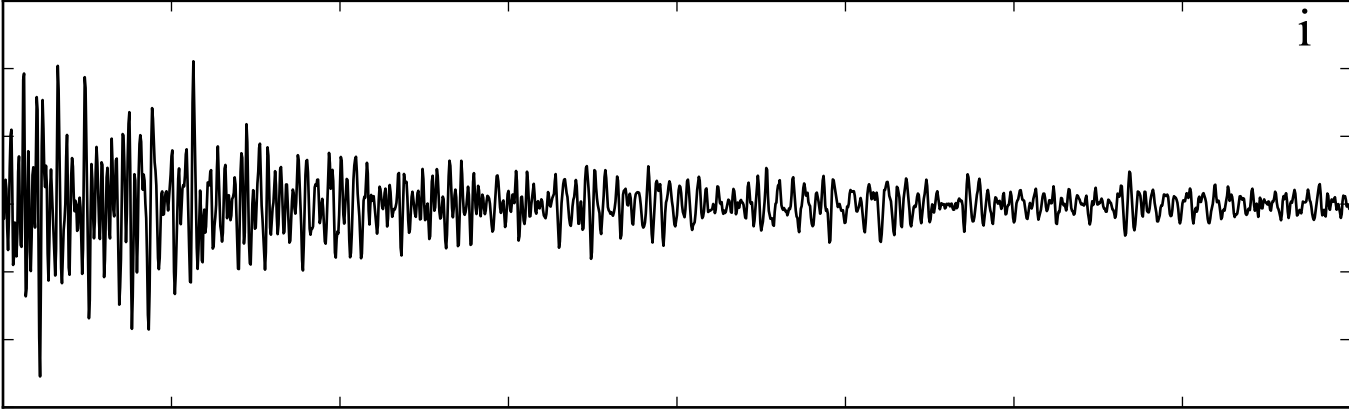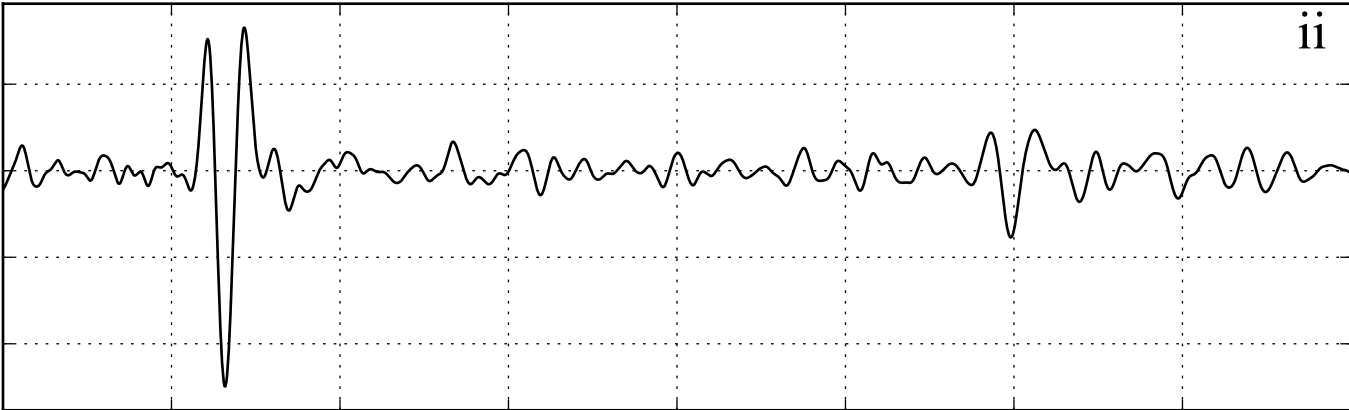

Time [s]

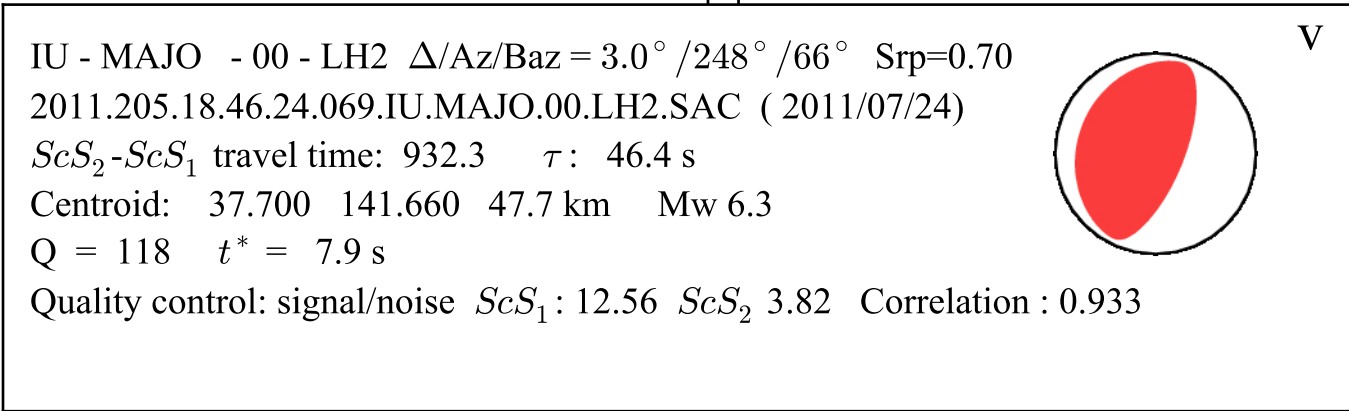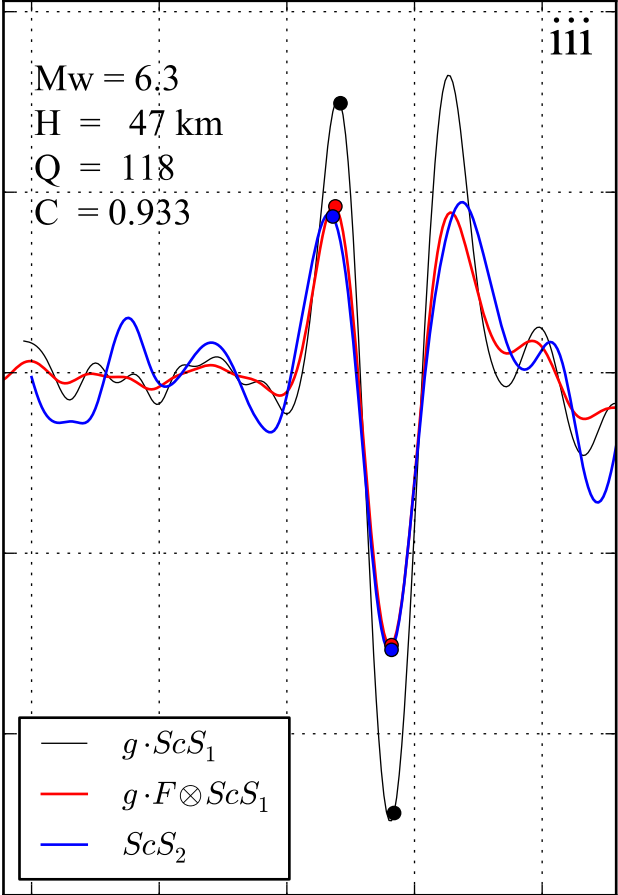

Time [s]

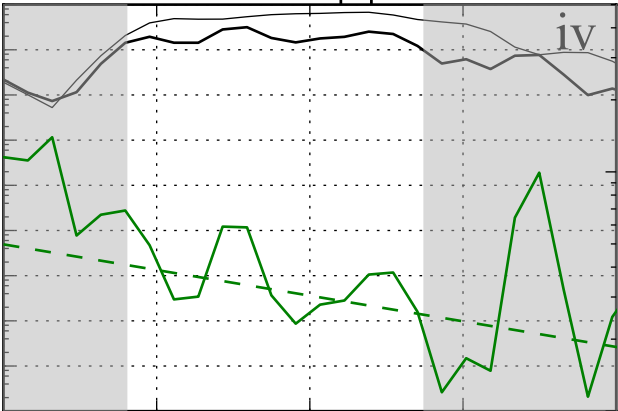

Frequency [hz]

Displacement spectrum

Spectral ratio



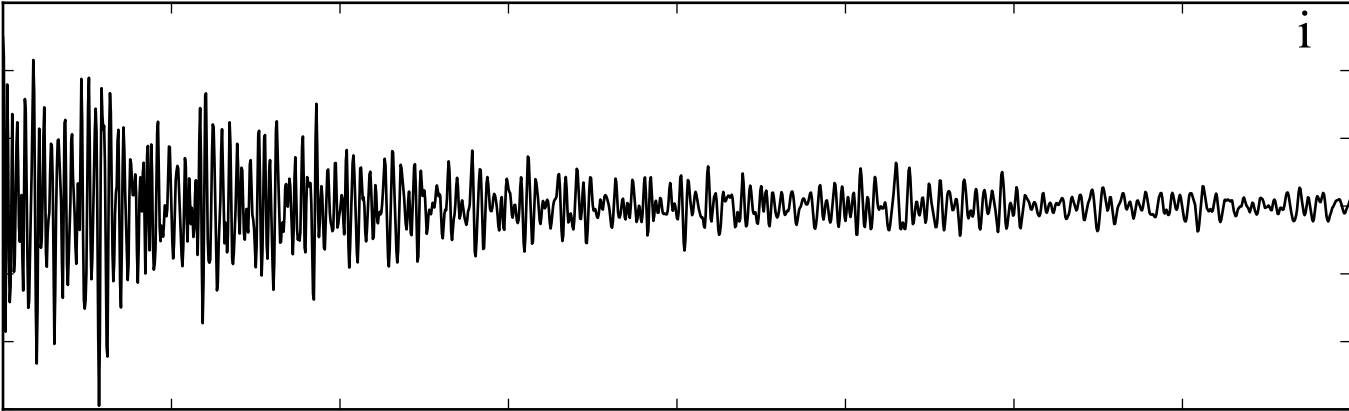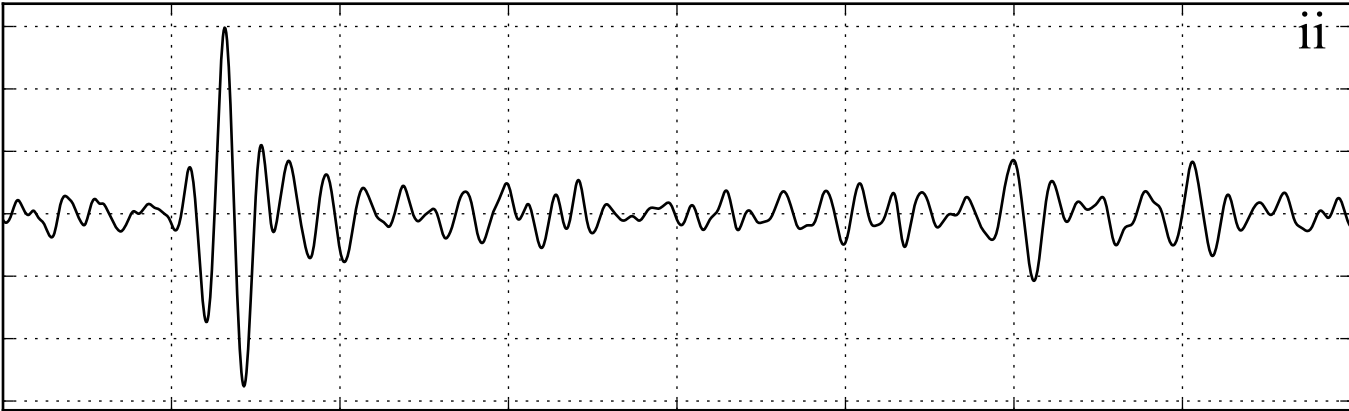

Time [s]

IU - MAJO - 10 - LH2  $\Delta/Az/Baz = 2.4^\circ/260^\circ/78^\circ$   $Srp=0.37$   
2011.211.18.48.49.069.IU.MAJO.10.LH2.SAC (2011/07/30)  
 $ScS_2$ - $ScS_1$  travel time: 935.4  $\tau$ : 45.4 s  
Centroid: 37.000 141.160 52.7 km Mw 6.4  
 $Q = 160$   $t^* = 5.8$  s  
Quality control: signal/noise  $ScS_1$ : 8.76  $ScS_2$  2.95 Correlation : 0.852

v

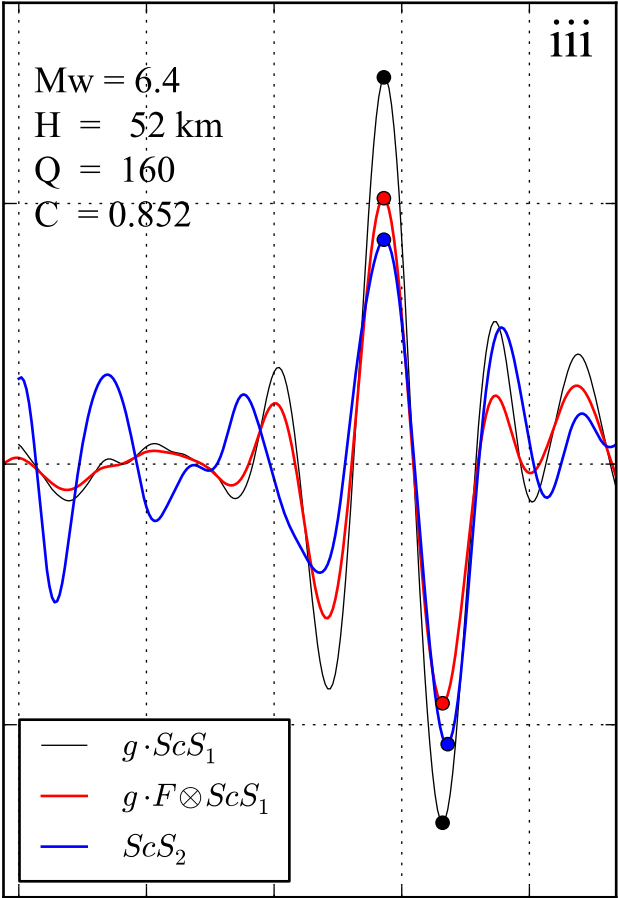

Time [s]

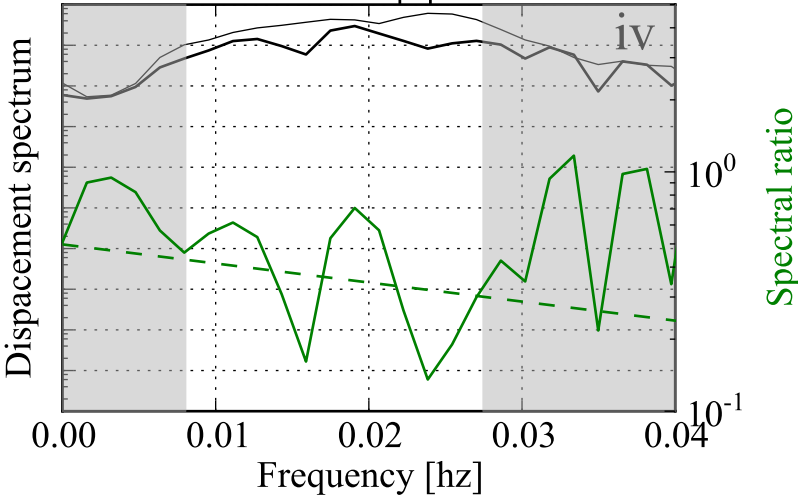

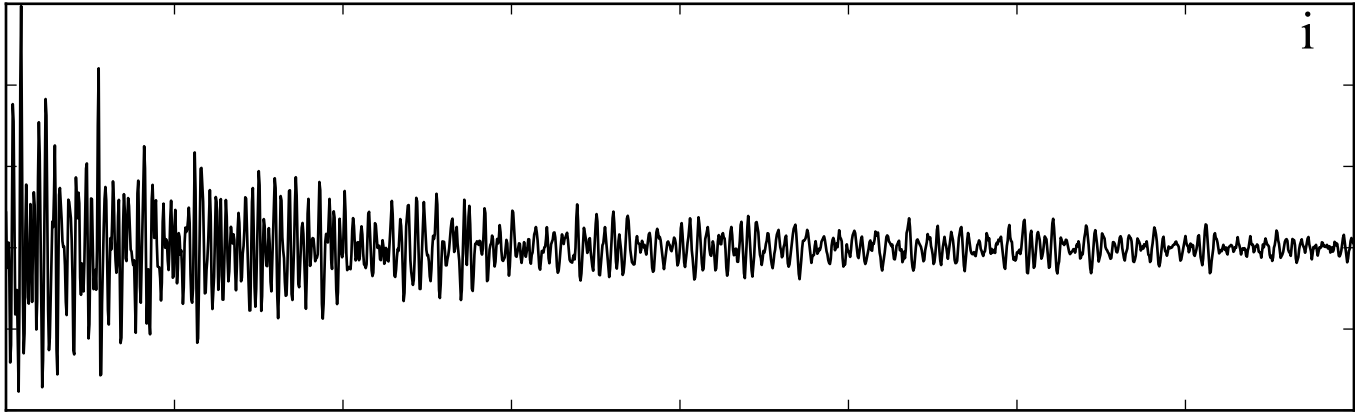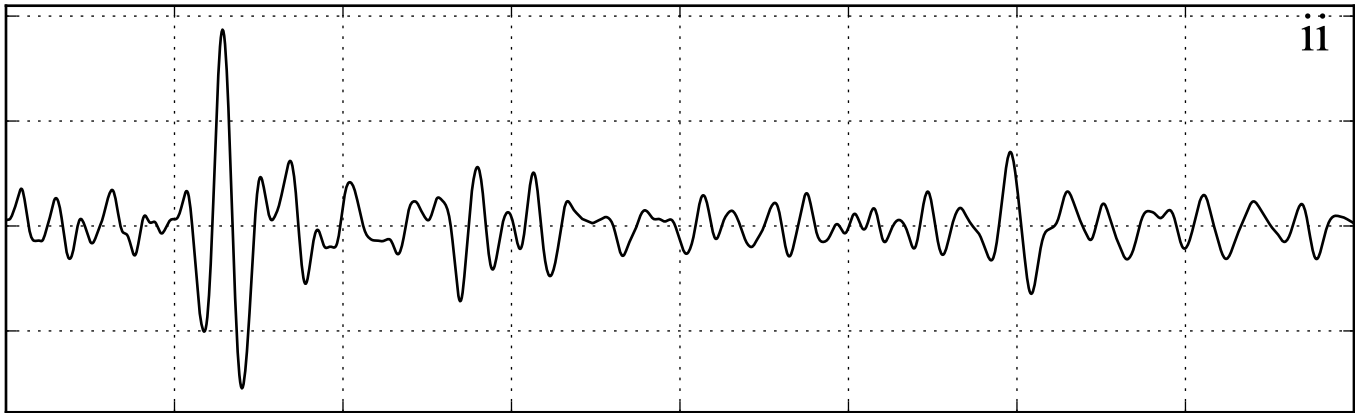

Time [s]

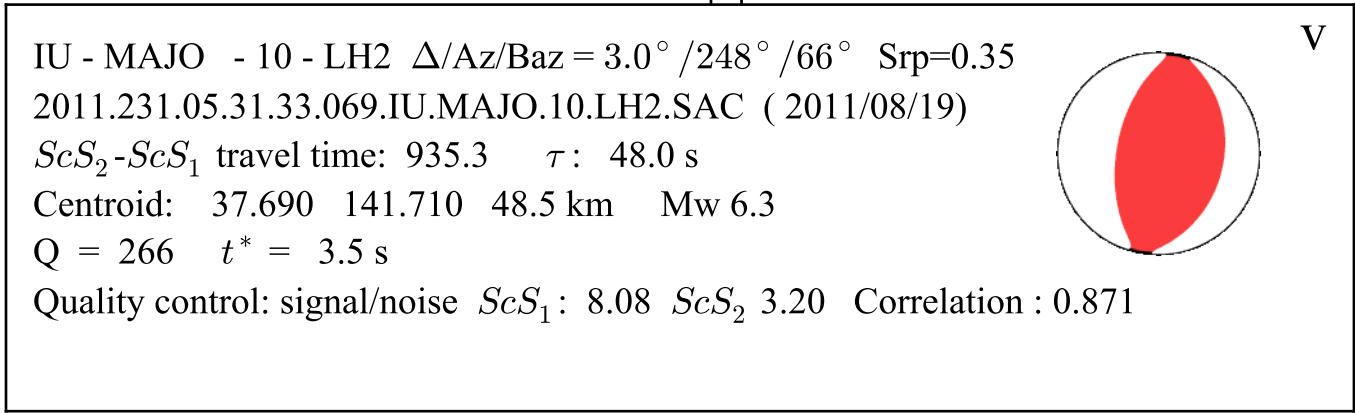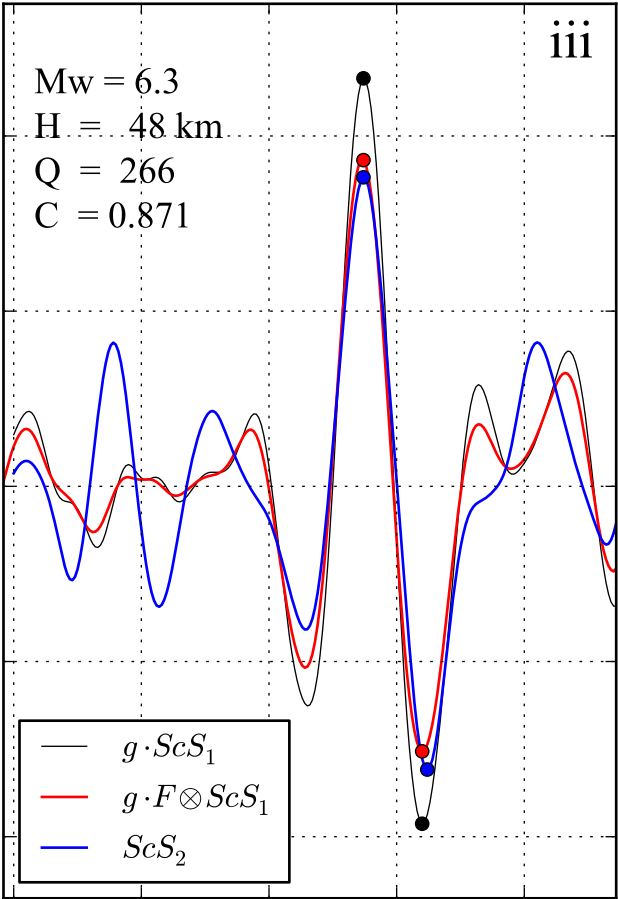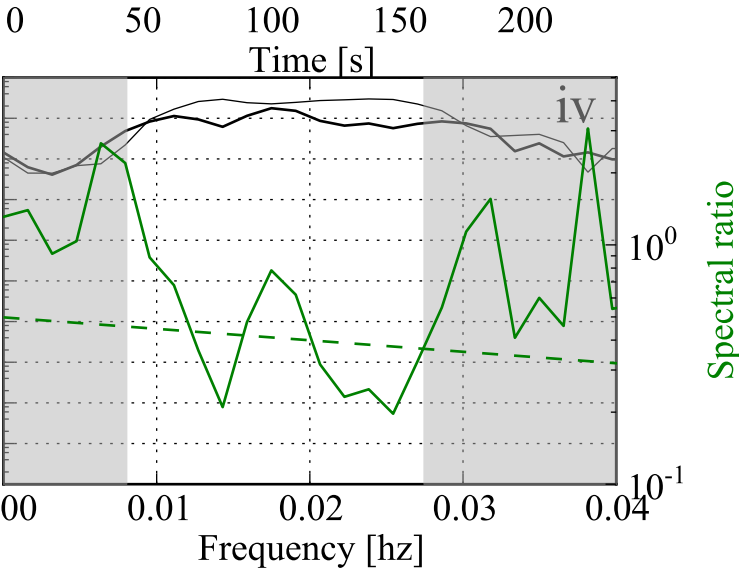

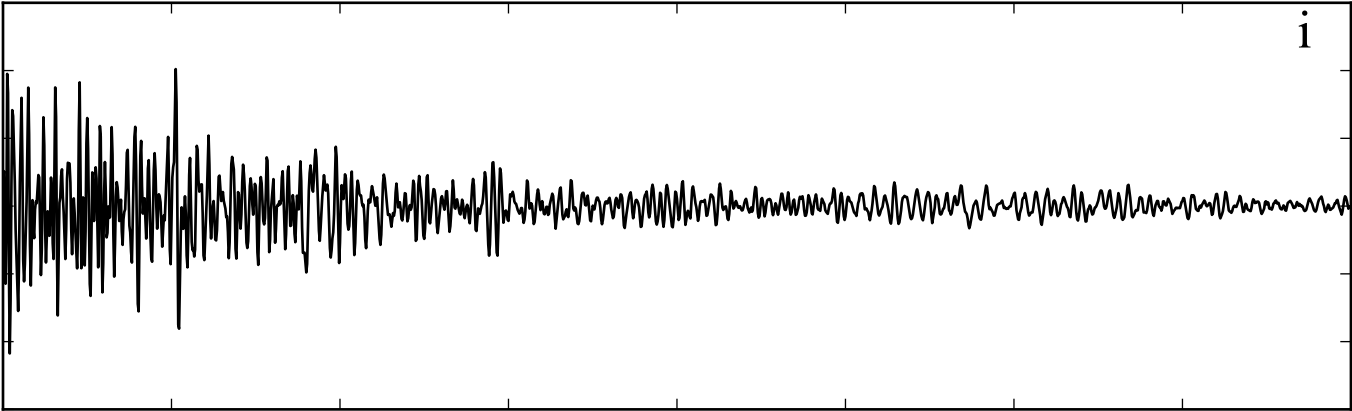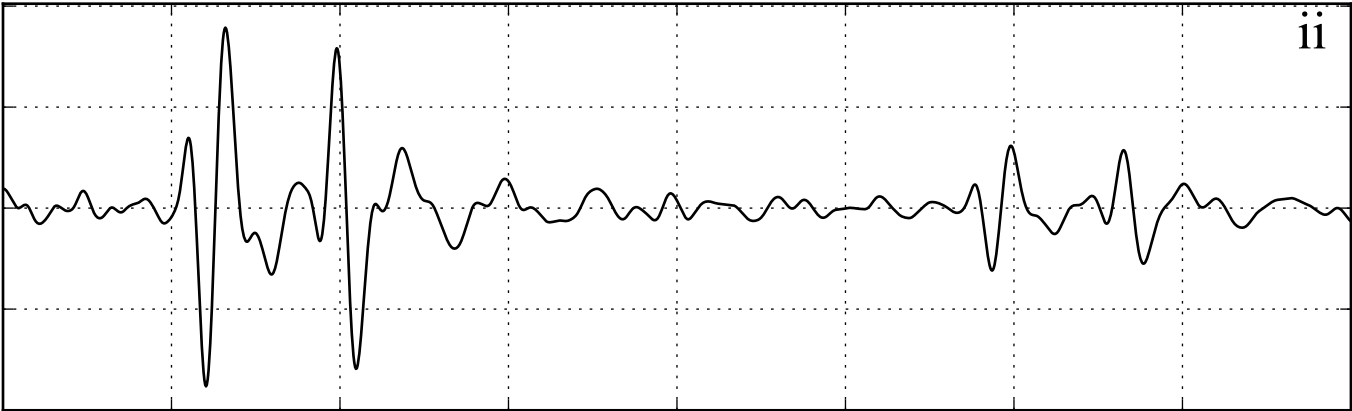

Time [s]

IU - MAJO - 00 - LH2  $\Delta/Az/Baz = 4.9^\circ / 0^\circ / 180^\circ$   $Srp=0.93$   
2012.001.05.22.56.069.IU.MAJO.00.LH2.SAC ( 2012/01/01)  
 $ScS_2-ScS_1$  travel time: 933.4  $\tau$ : 50.1 s  
Centroid: 31.610 138.170 352.0 km Mw 6.8  
 $Q = 177$   $t^* = 5.3$  s  
Quality control: signal/noise  $ScS_1$ : 19.63  $ScS_2$  6.83 Correlation : 0.975

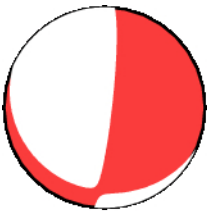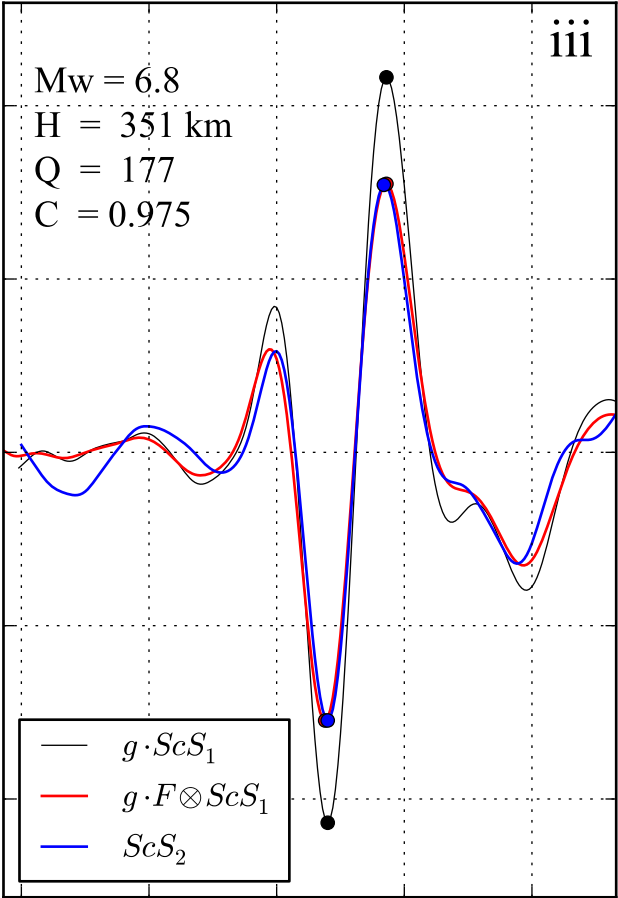

Time [s]

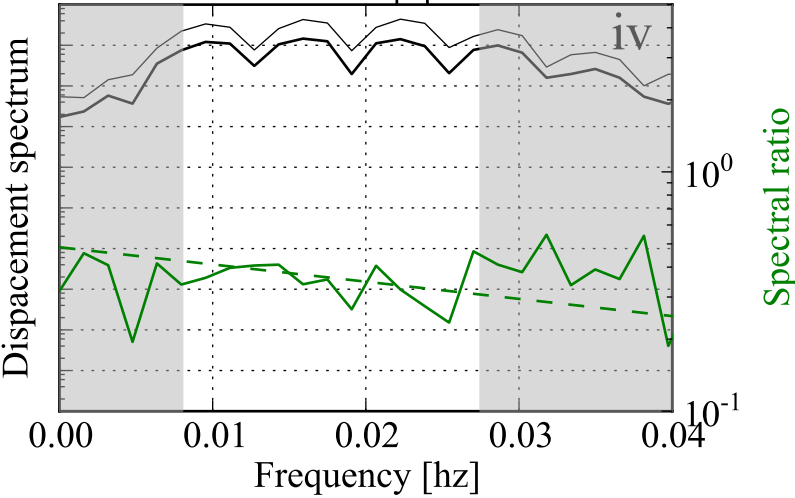

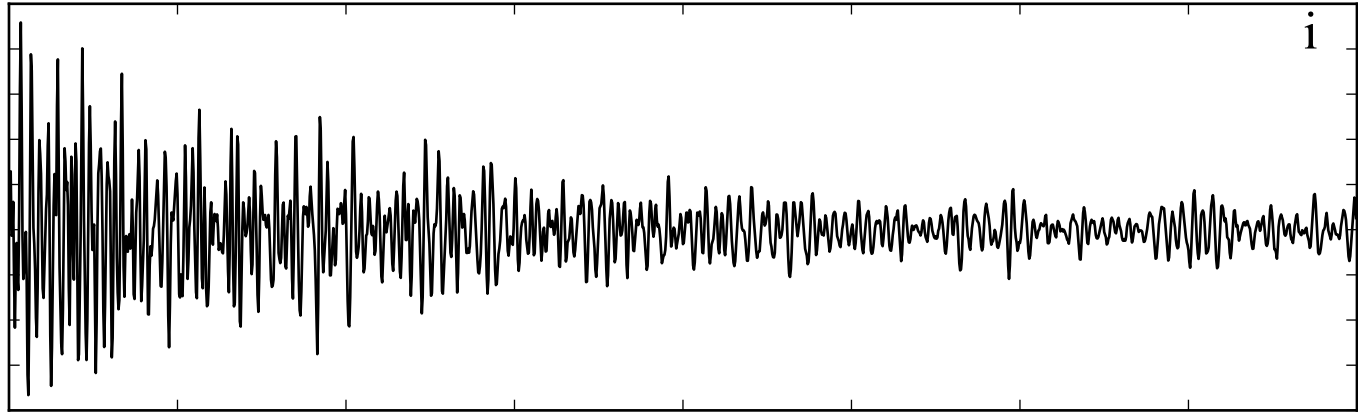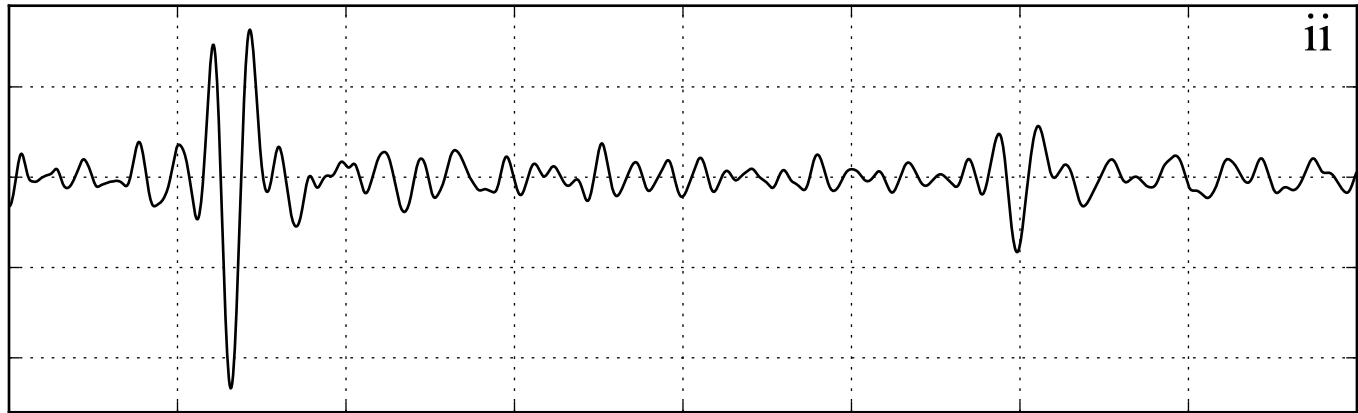

Time [s]

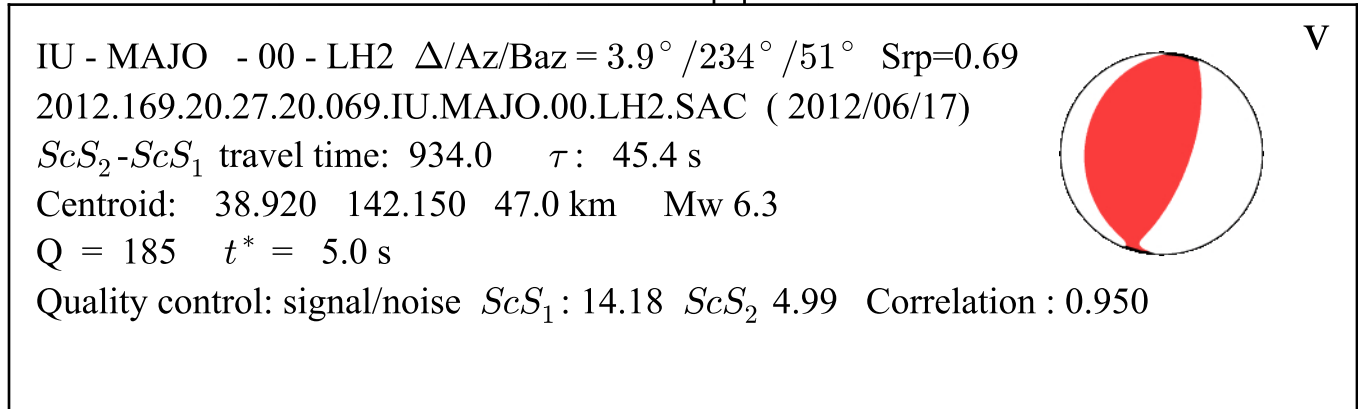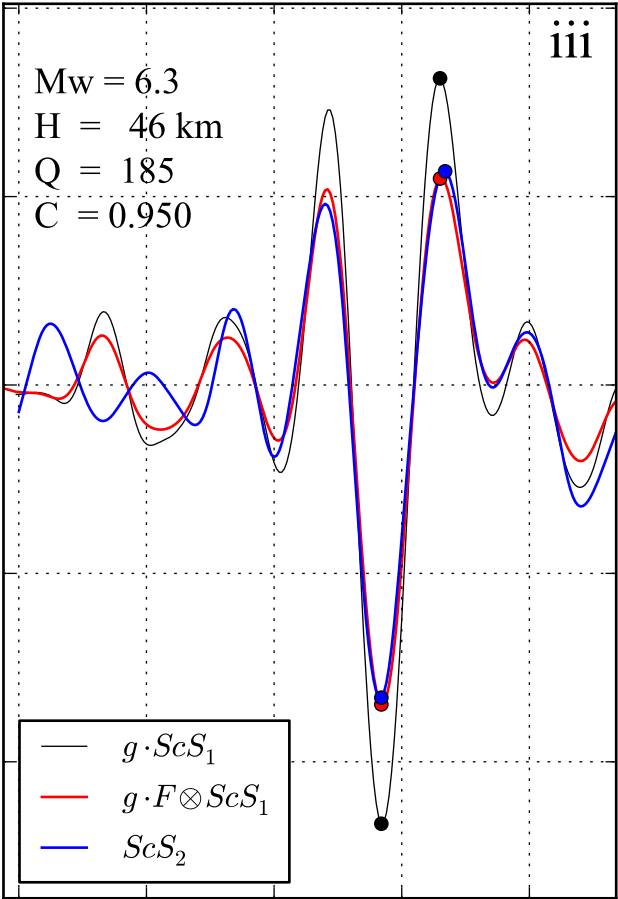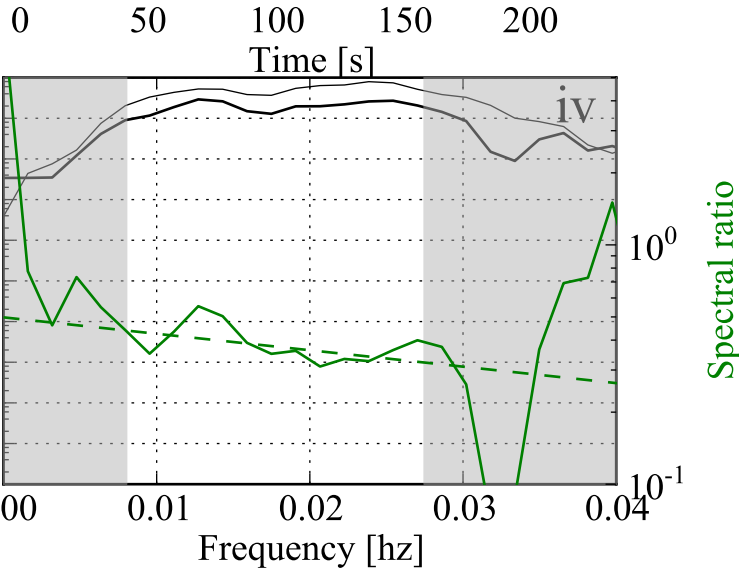

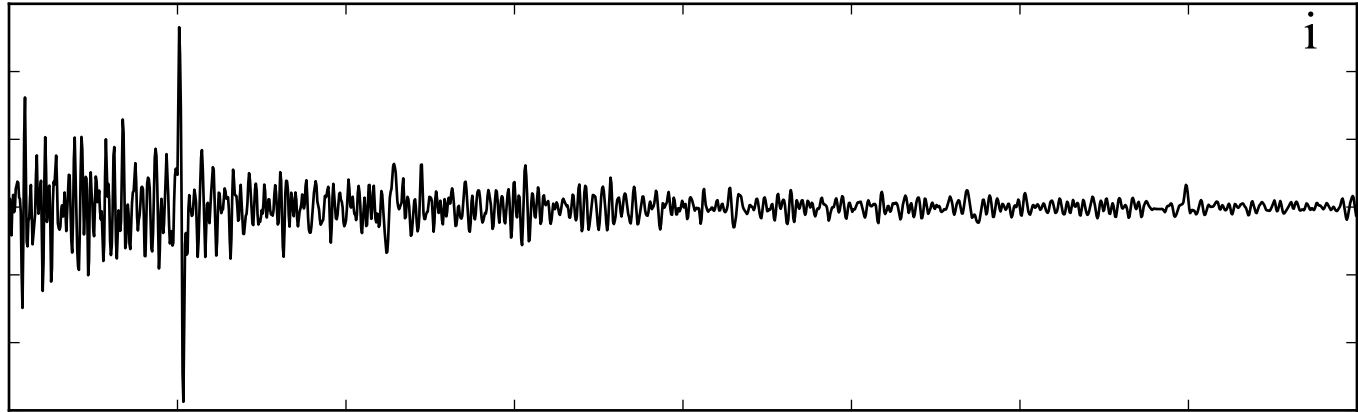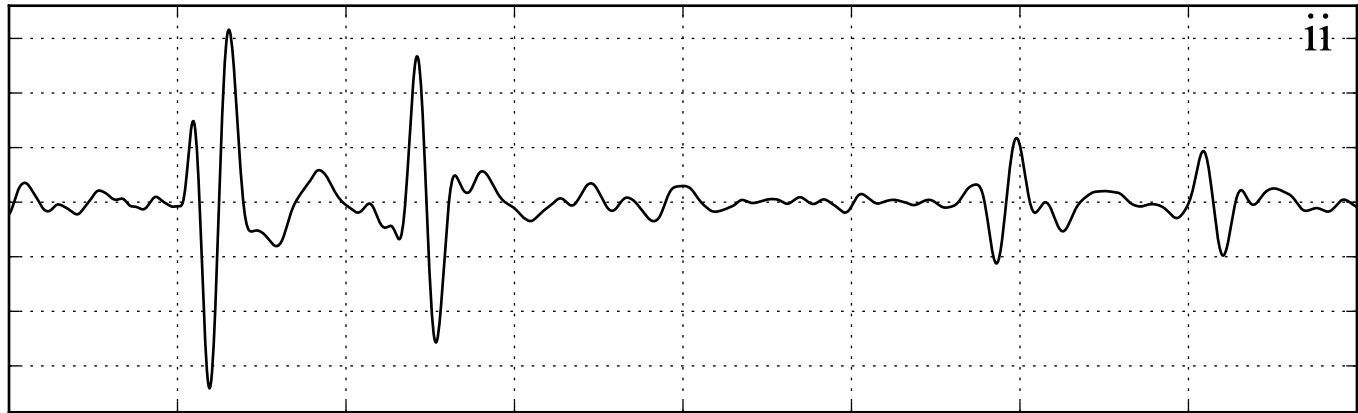

Time [s]

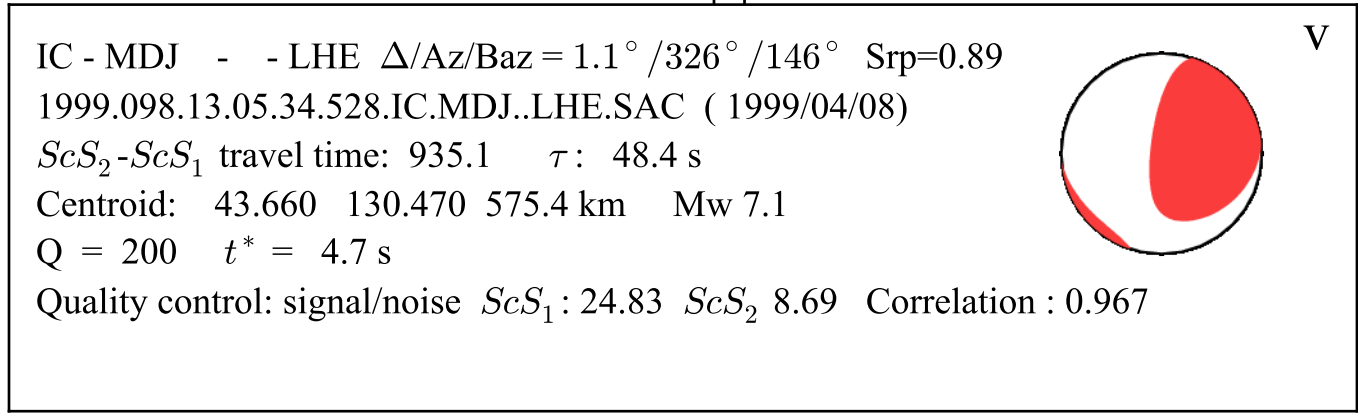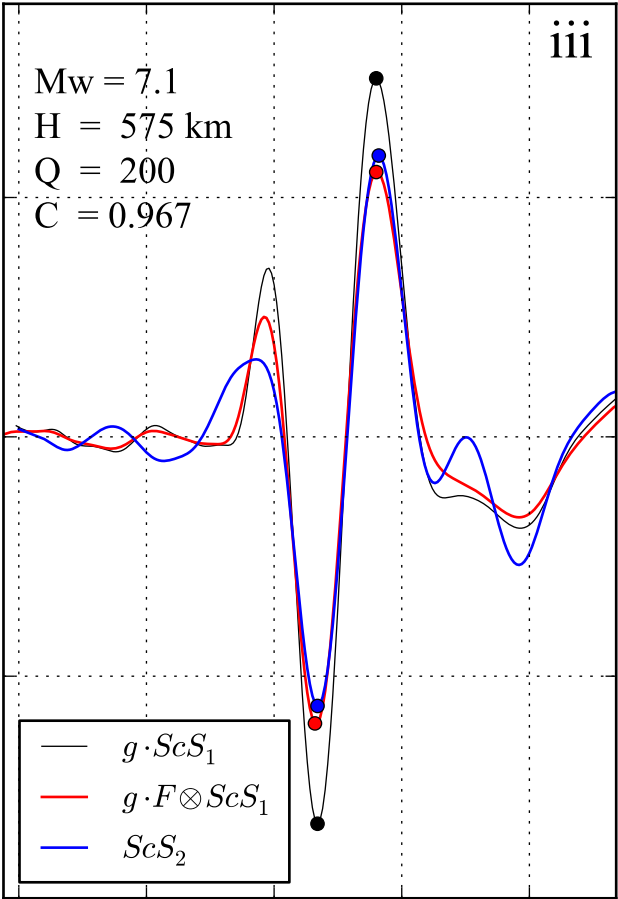

Time [s]

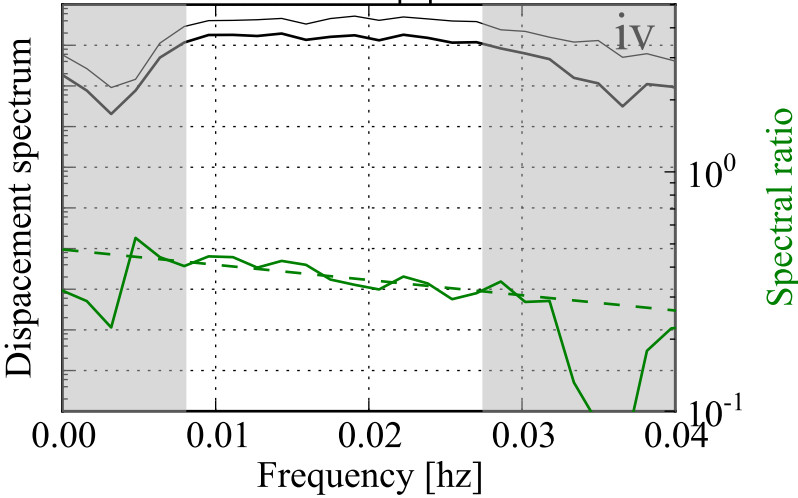

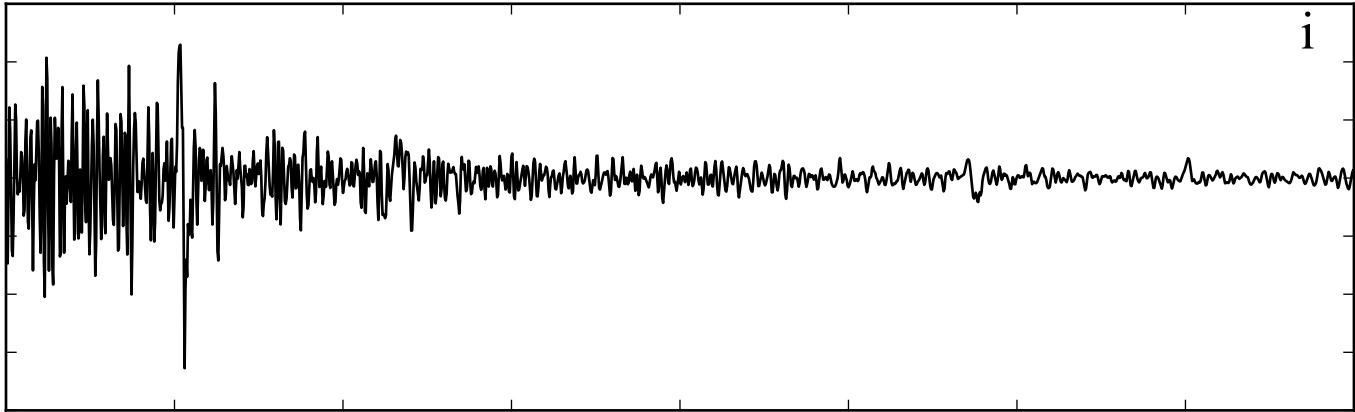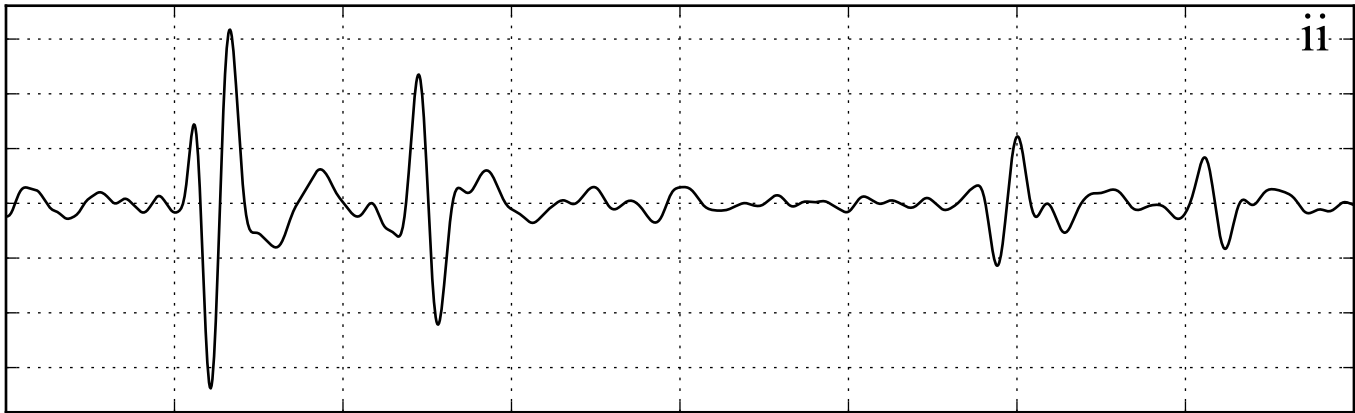

Time [s]

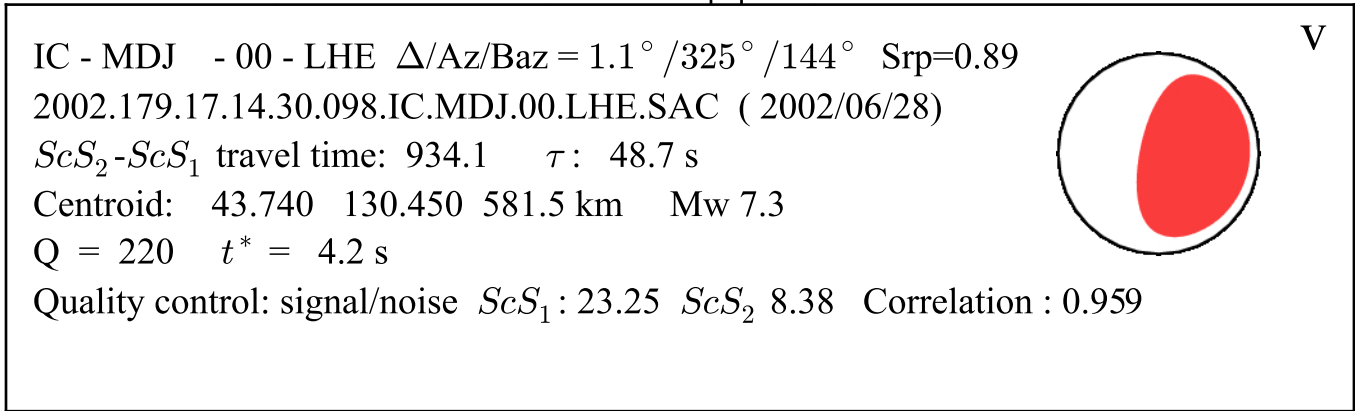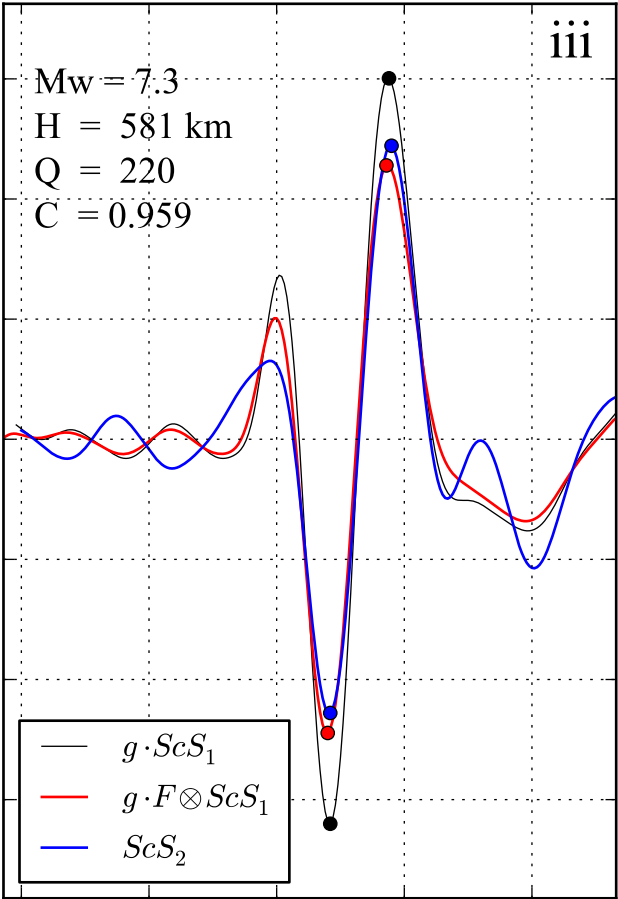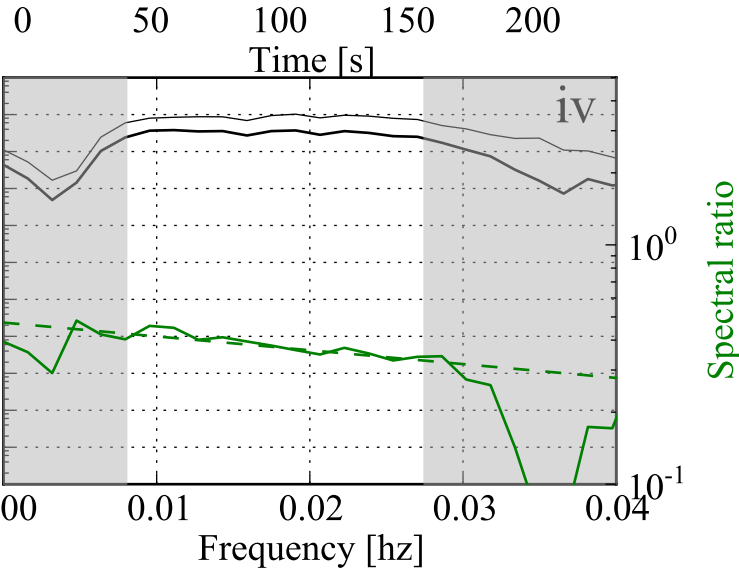

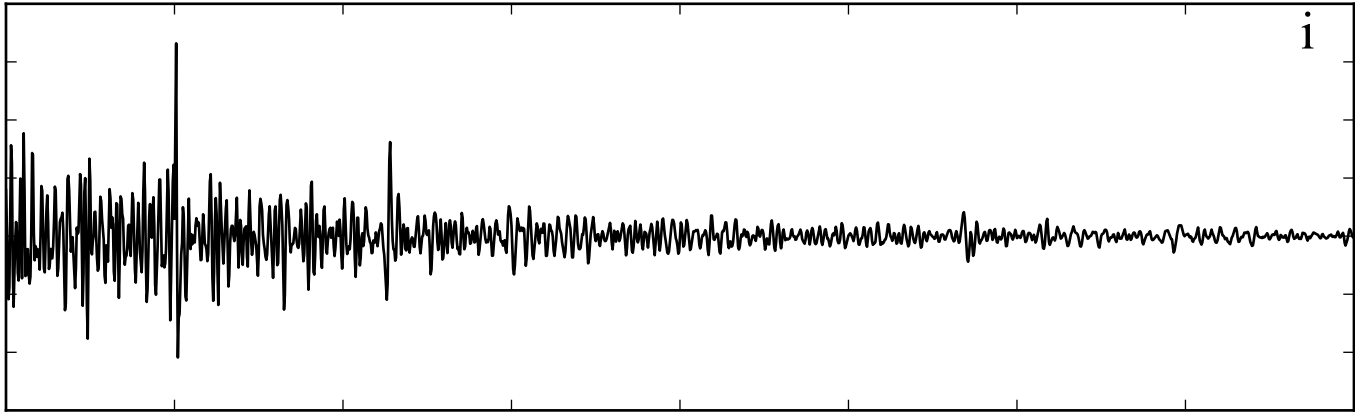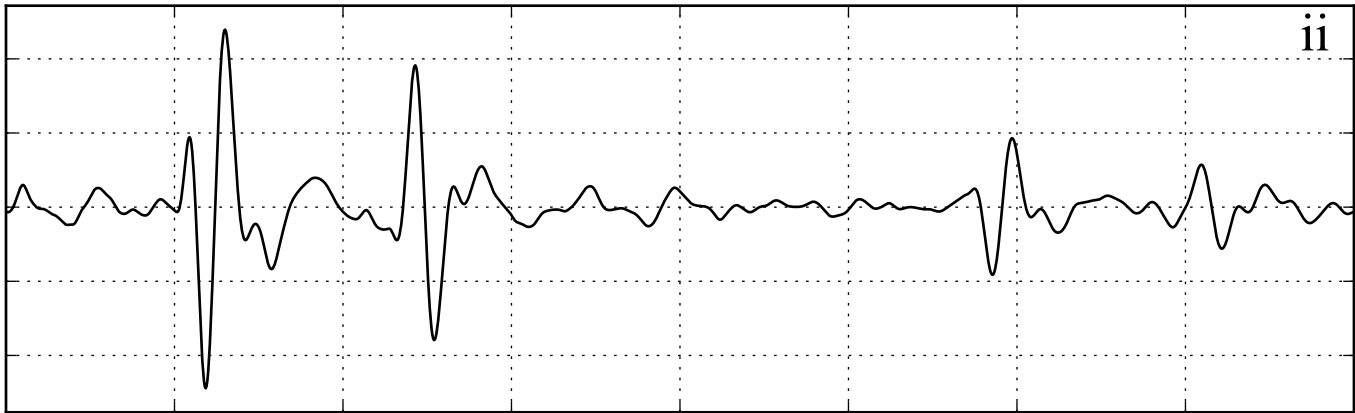

Time [s]

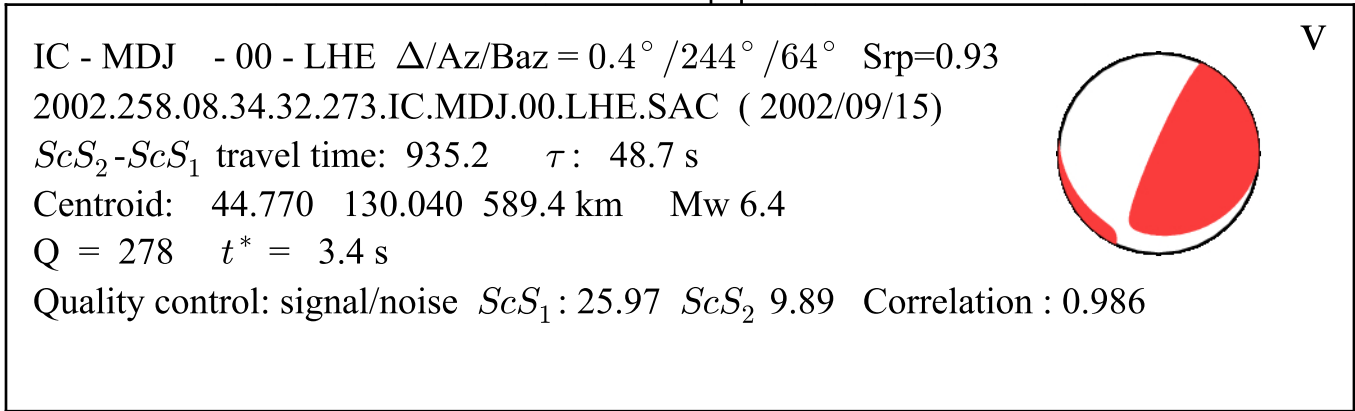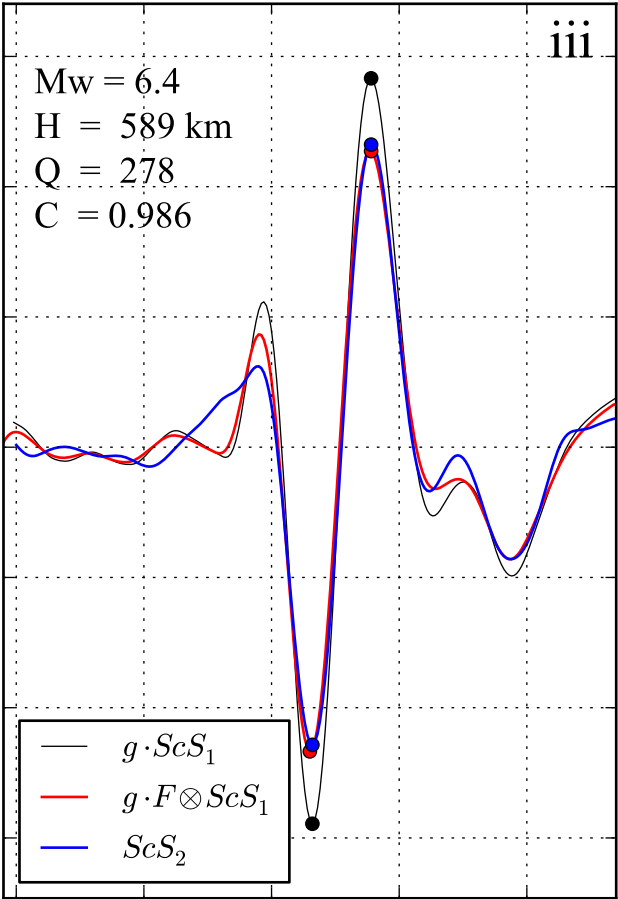

Time [s]

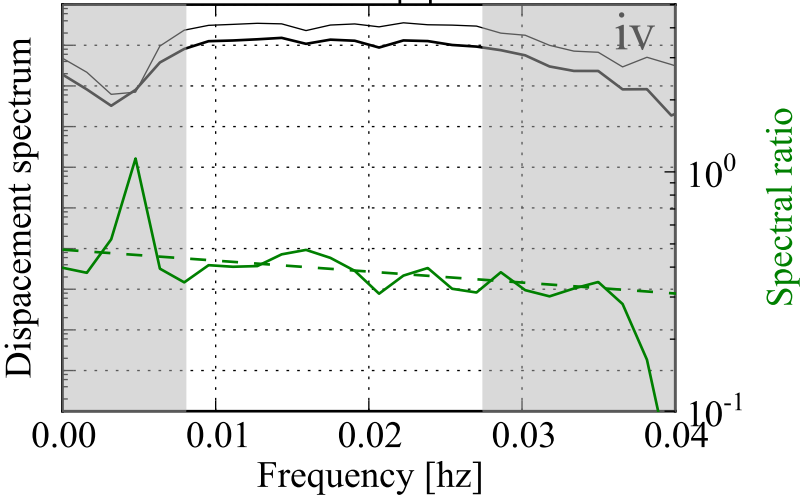

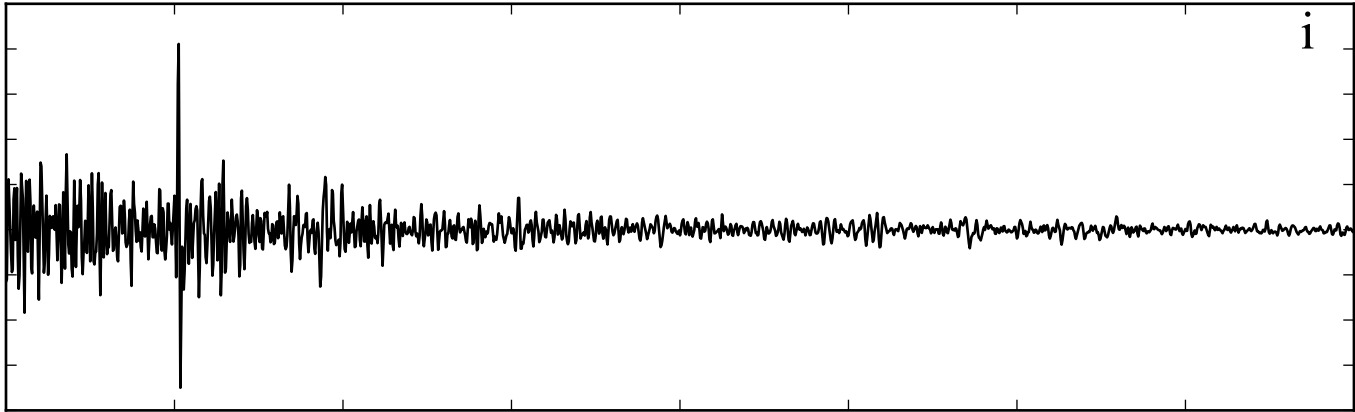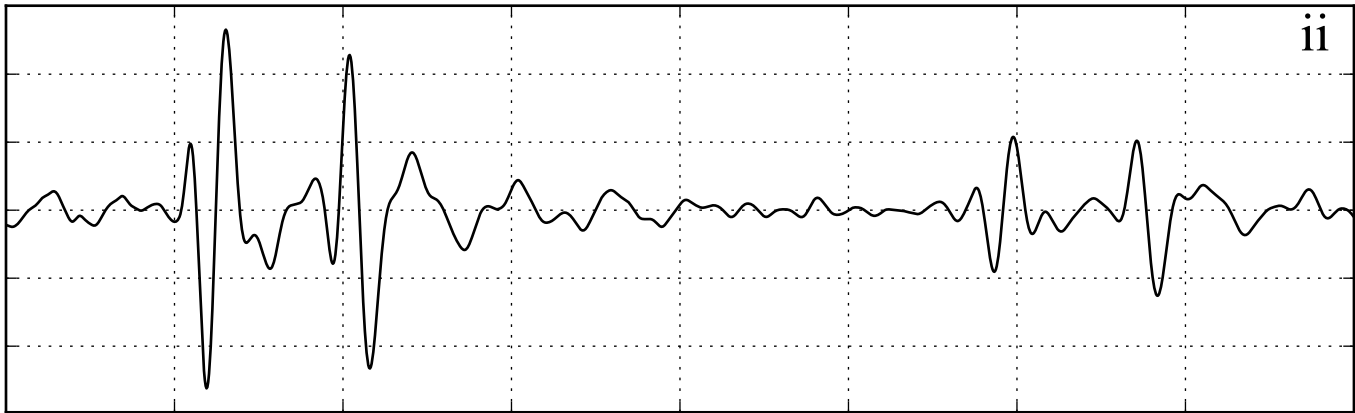

Time [s]

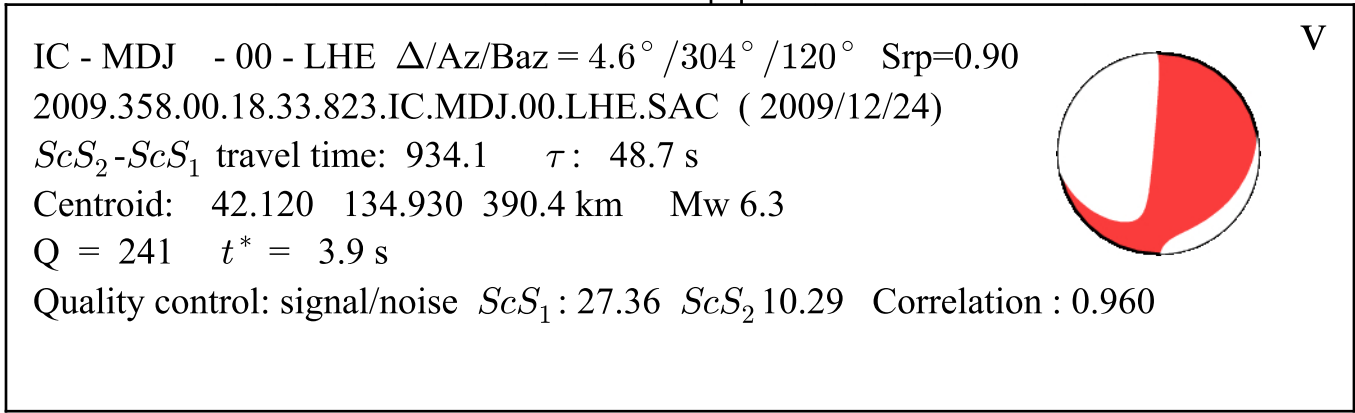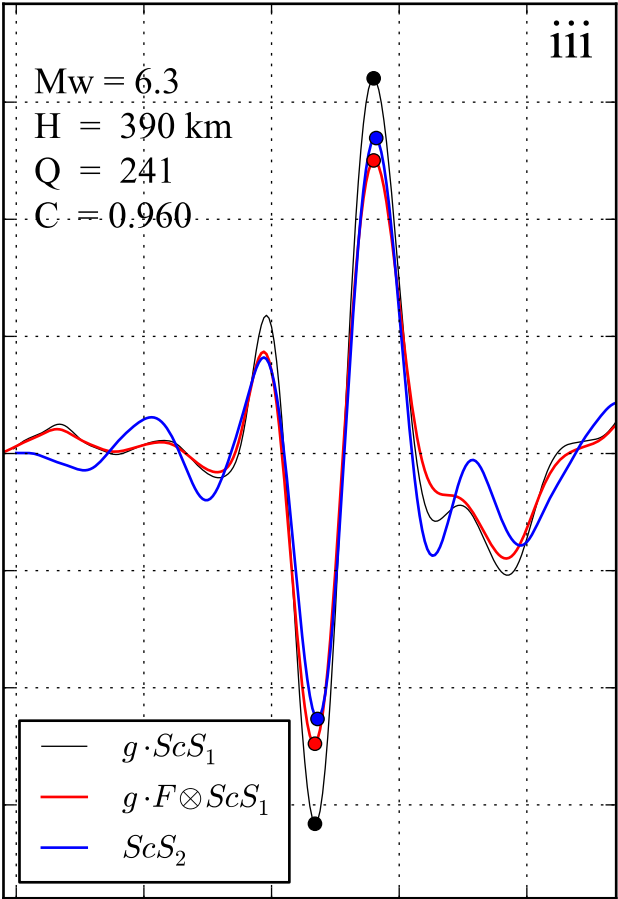

Time [s]

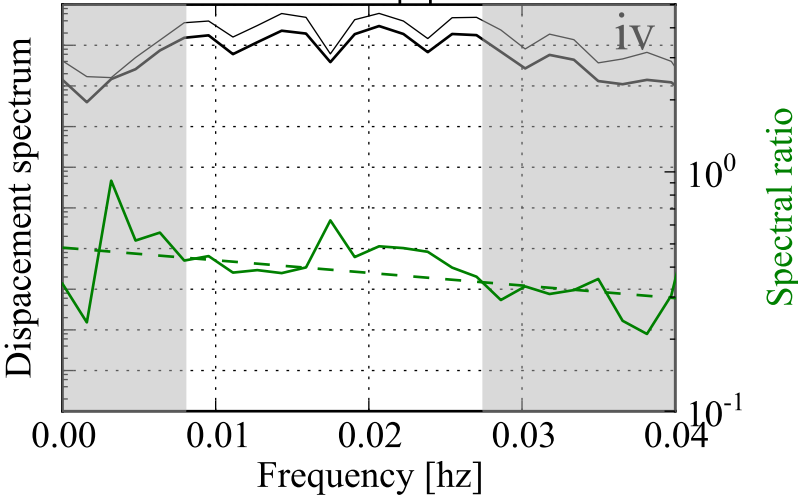



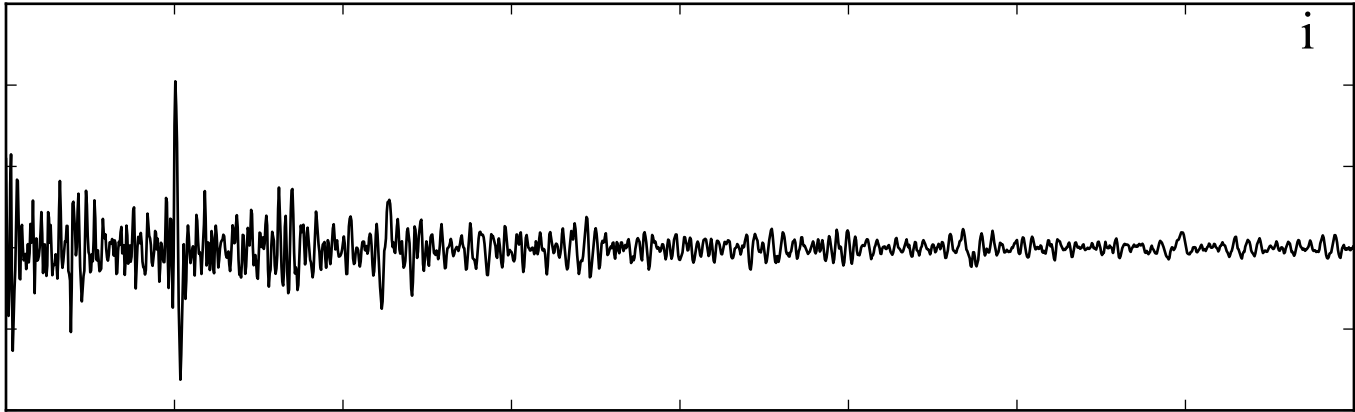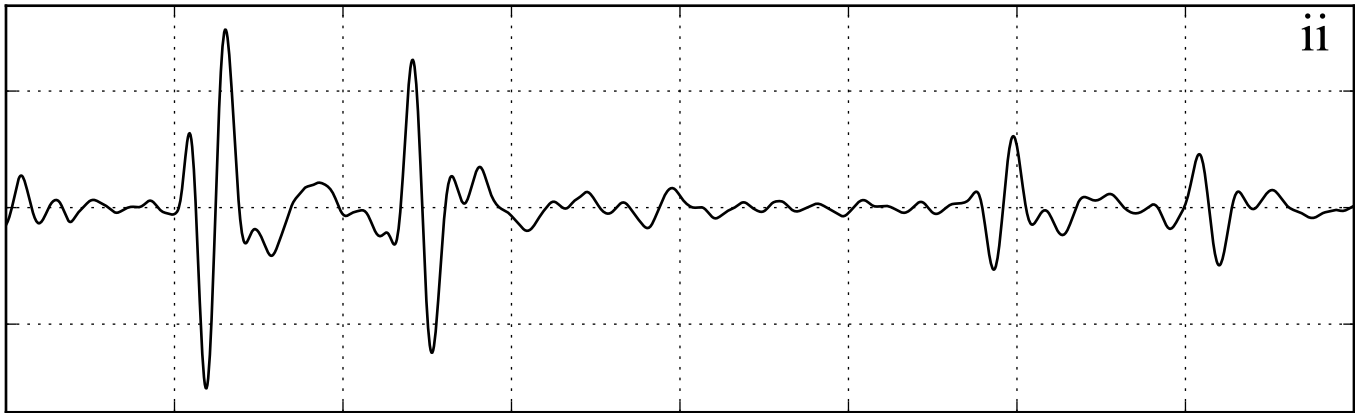

Time [s]

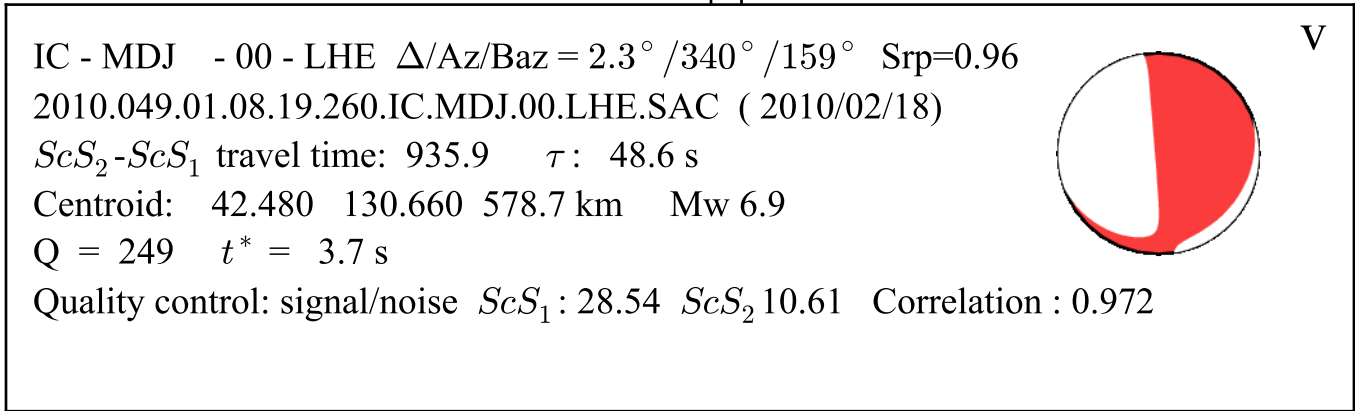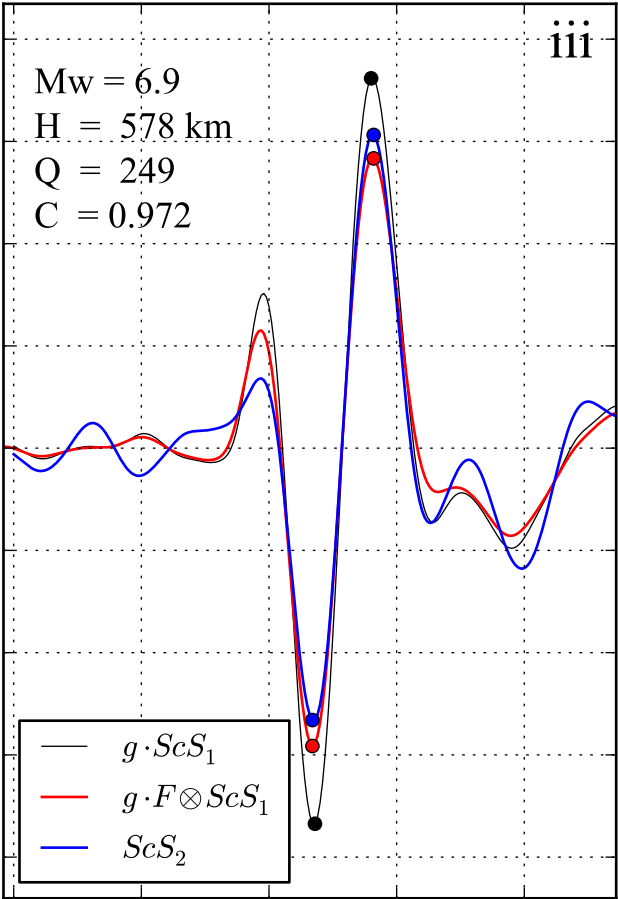

Time [s]

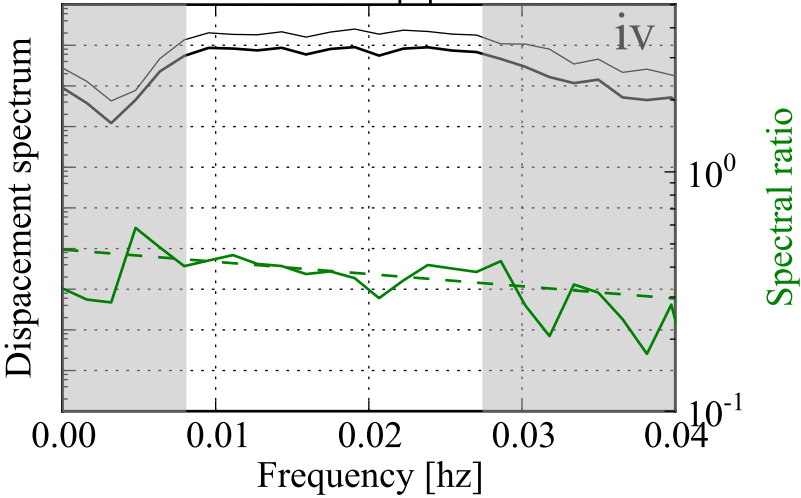

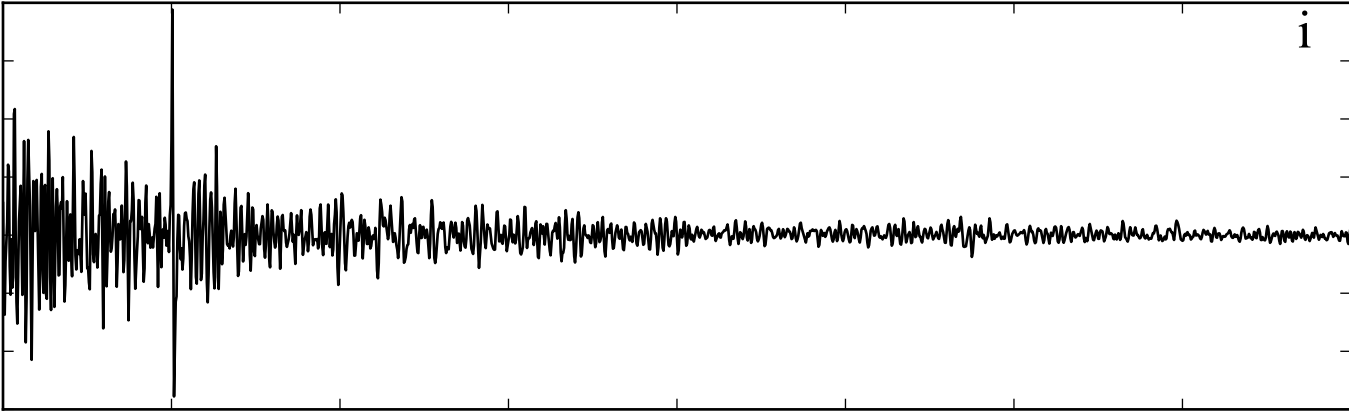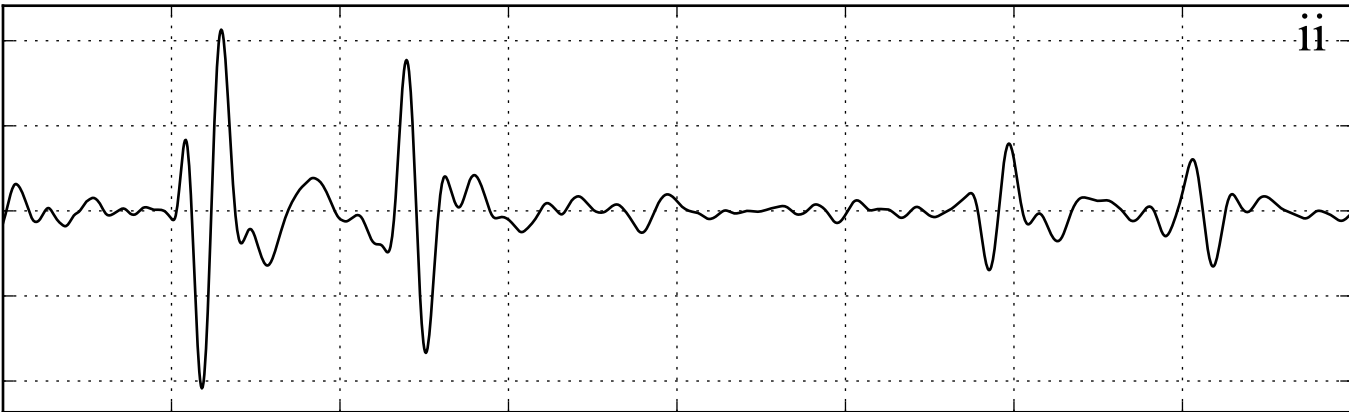

Time [s]

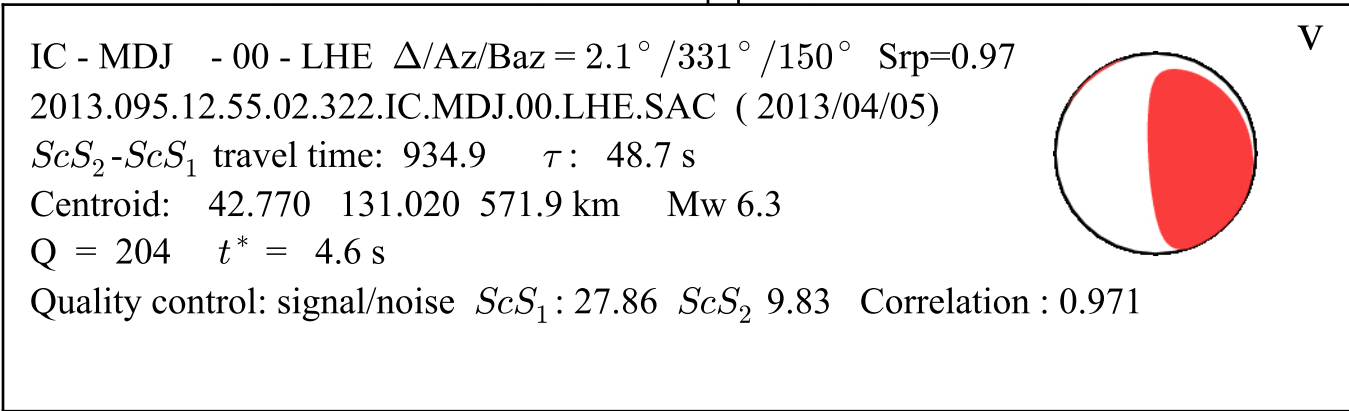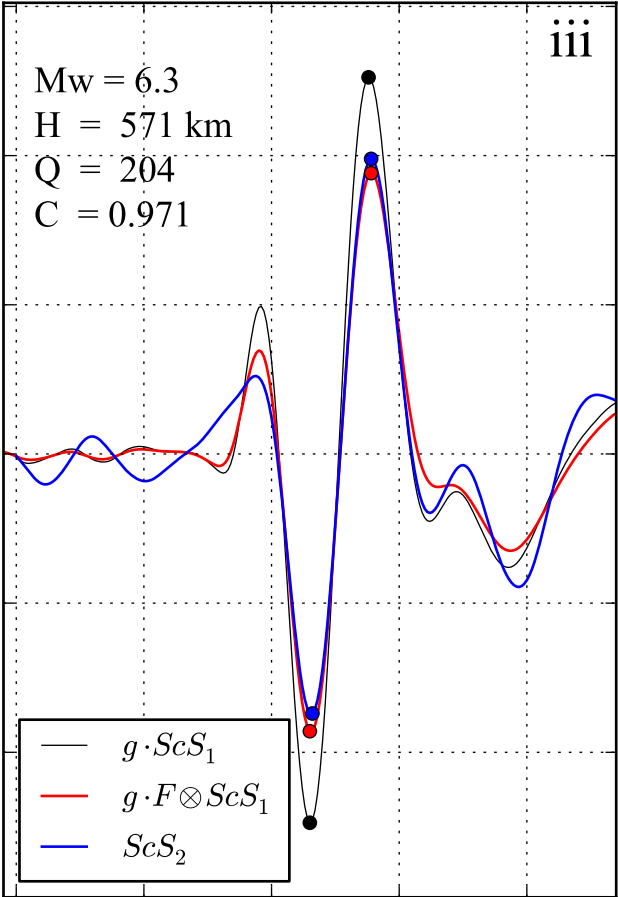

Time [s]

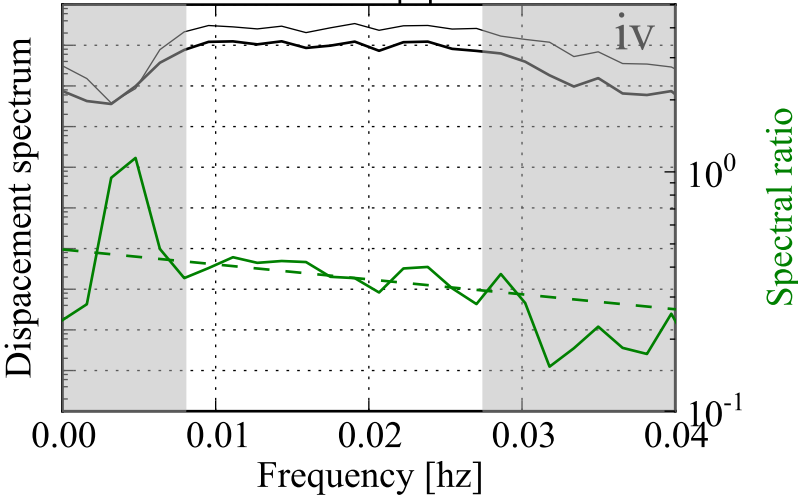

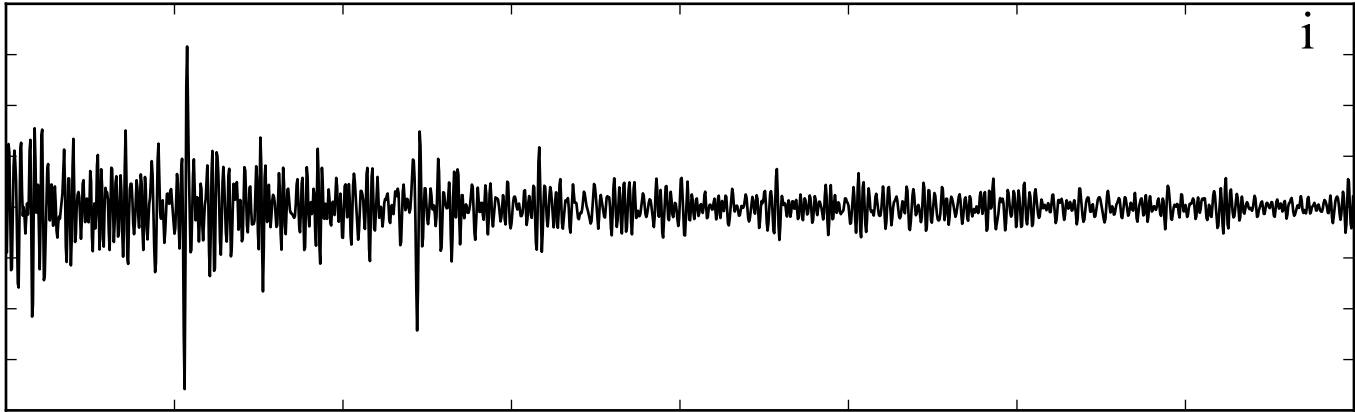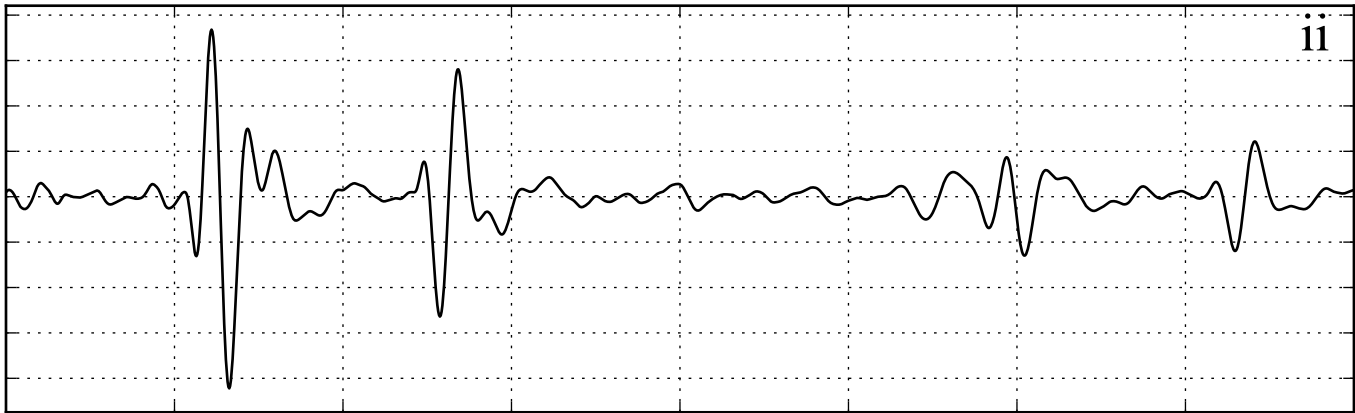

Time [s]

II - MSVF - 00 - LH2  $\Delta/Az/Baz = 4.0^\circ / 317^\circ / 138^\circ$   $Srp=0.87$

1995.017.16.49.12.998.II.MSVF.00.LH2.SAC ( 1995/01/17)

$ScS_2$ - $ScS_1$  travel time: 942.9  $\tau$ : 44.3 s

Centroid: -20.710 -179.130 649.4 km Mw 6.3

$Q = 118$   $t^* = 8.0$  s

Quality control: signal/noise  $ScS_1$ : 17.03  $ScS_2$  4.67 Correlation : 0.832

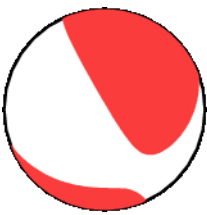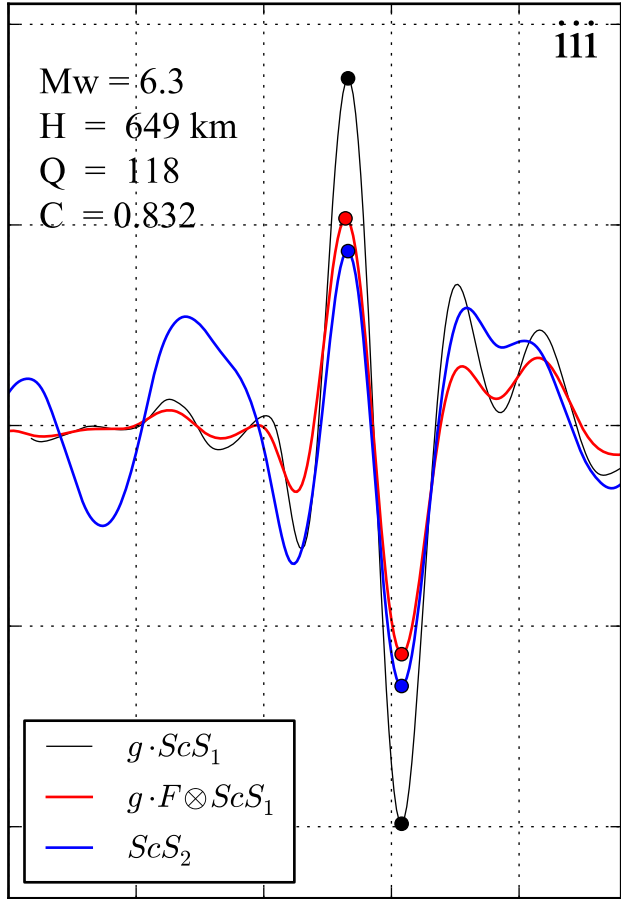

Time [s]

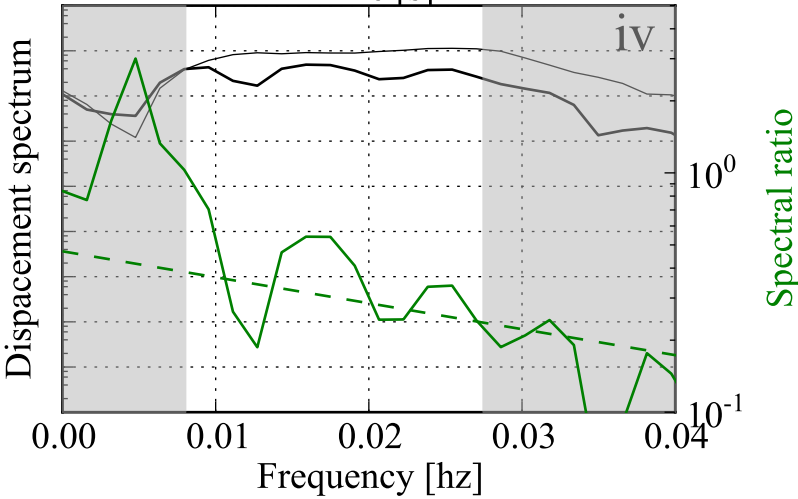

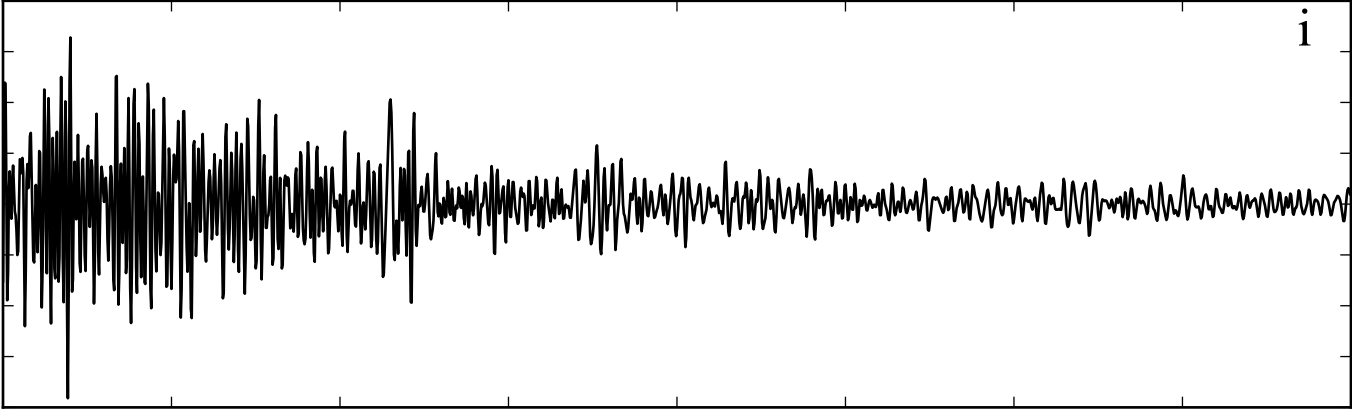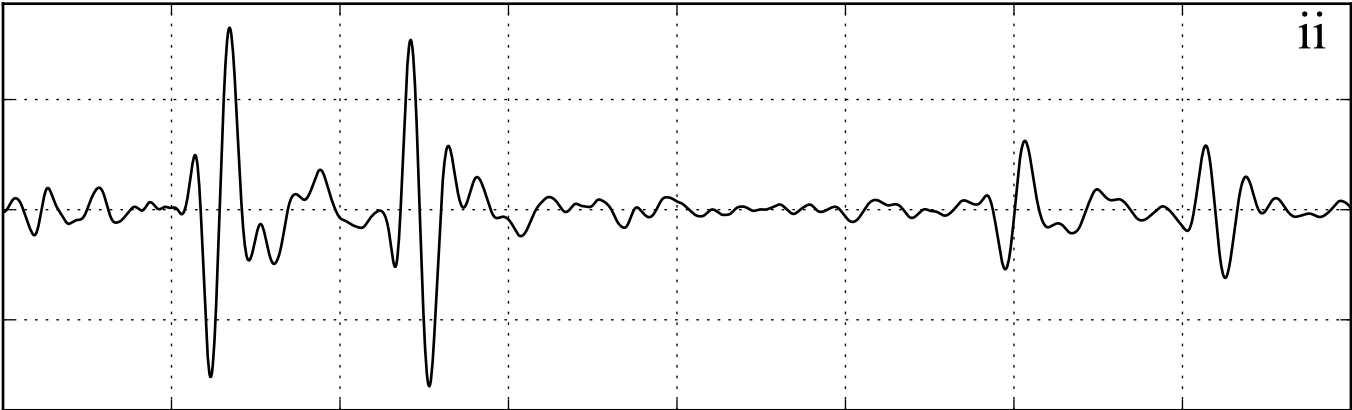

Time [s]

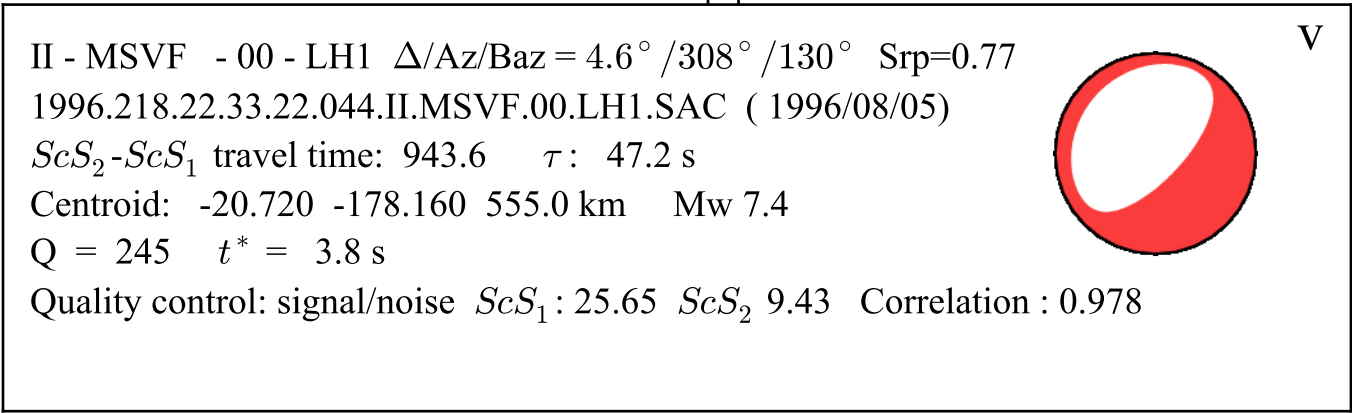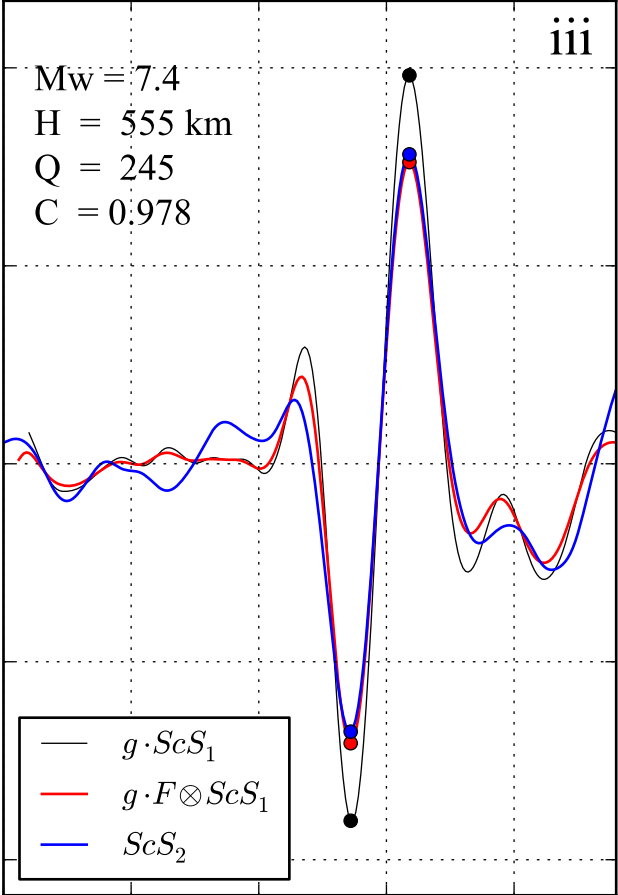

Time [s]

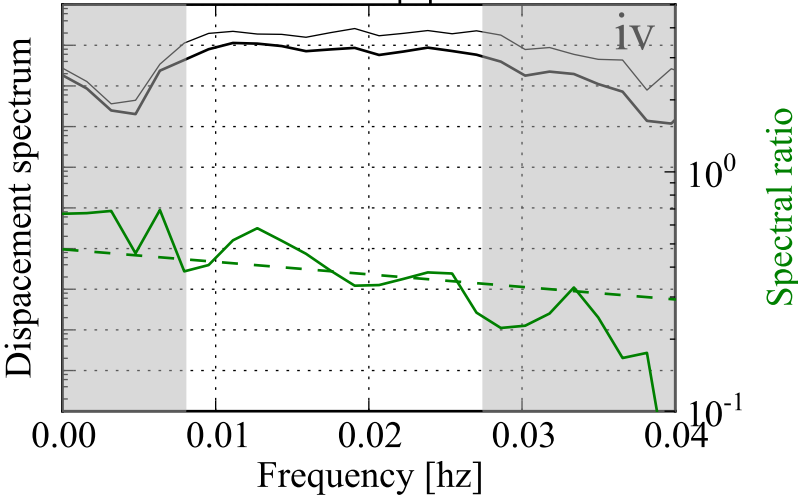

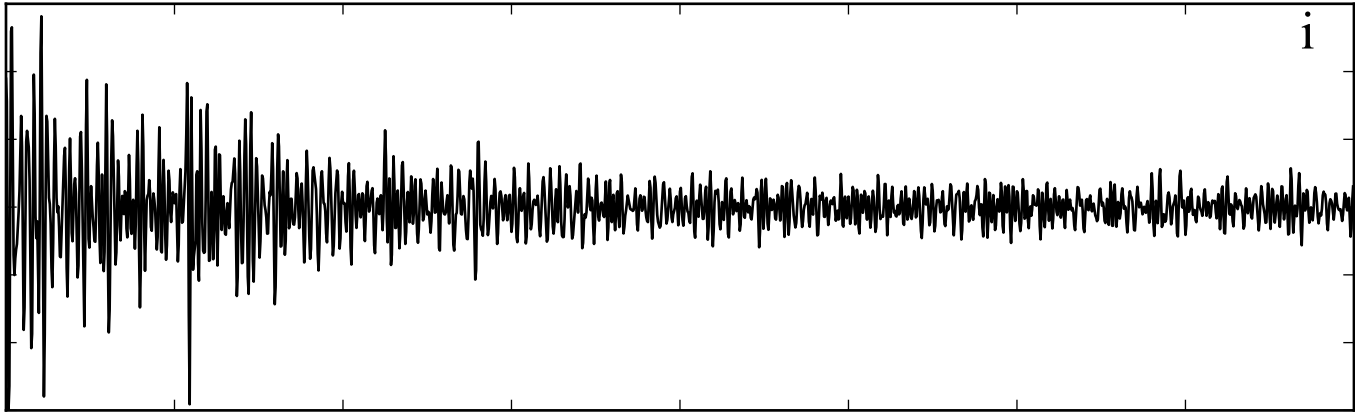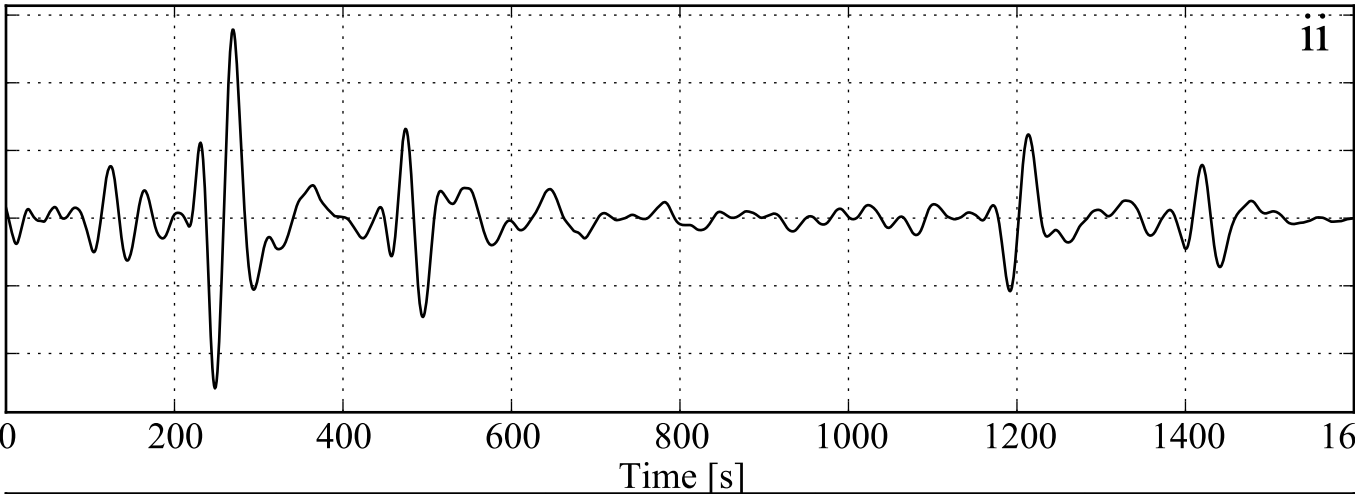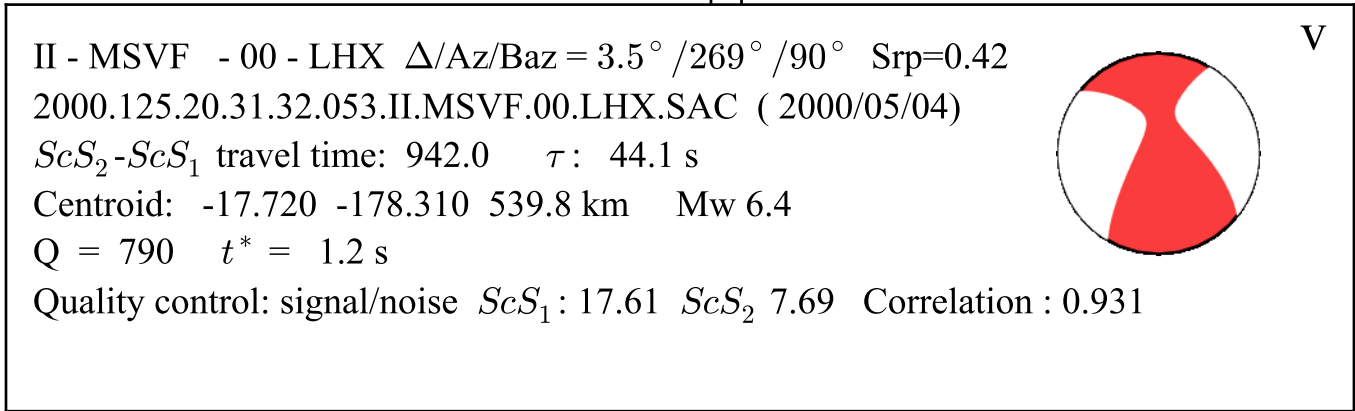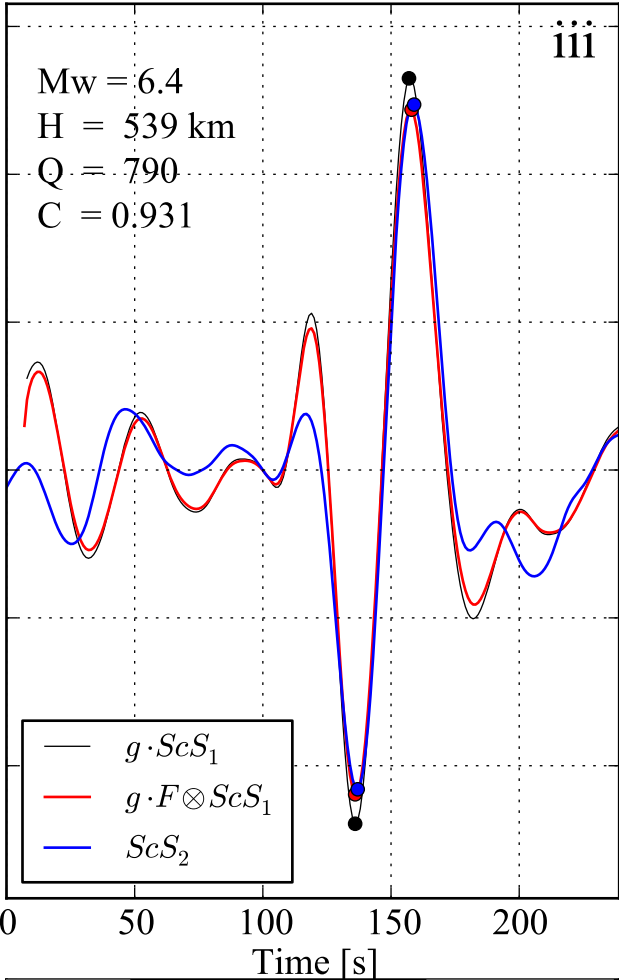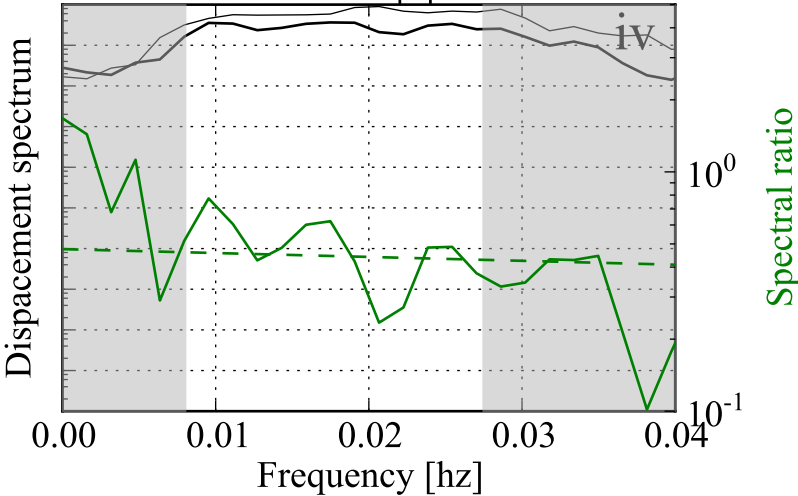

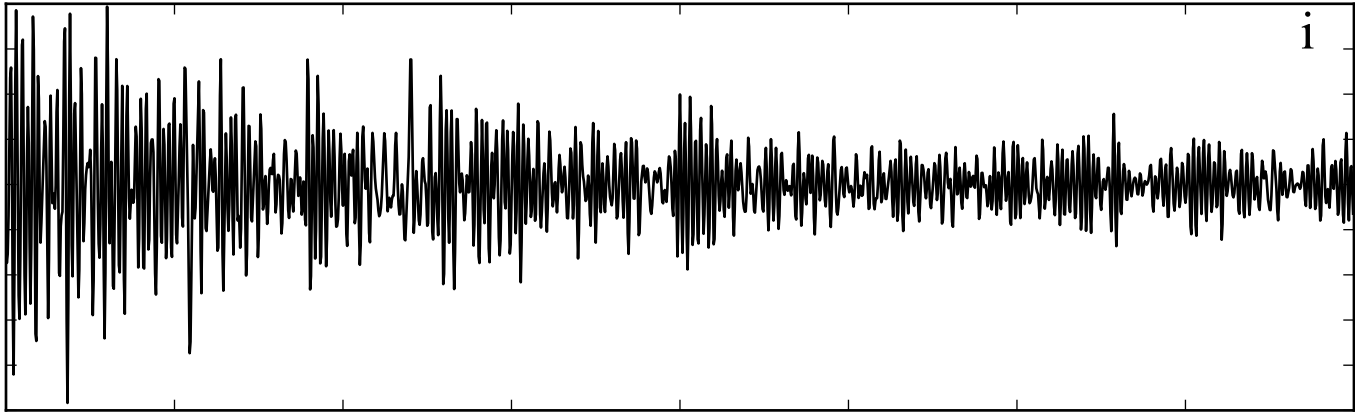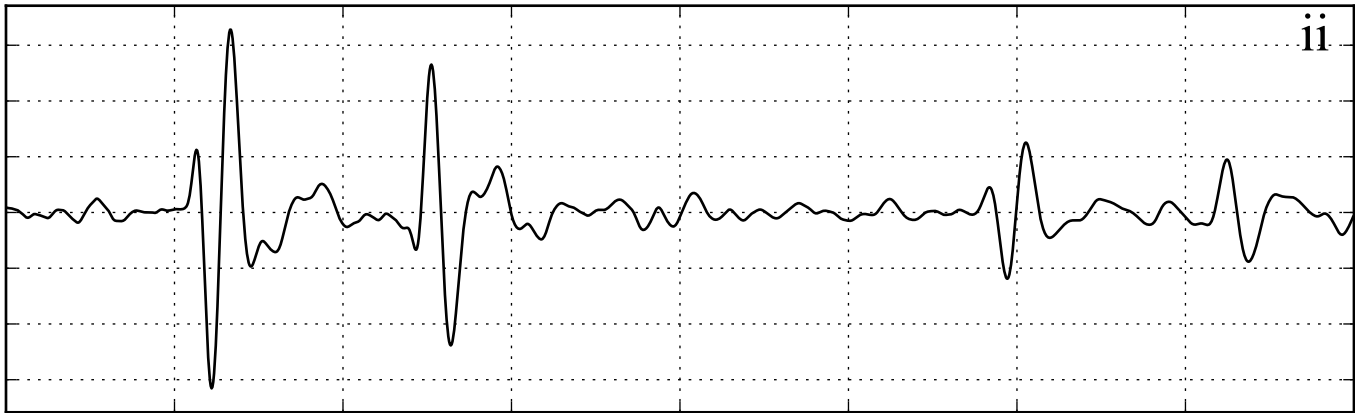

Time [s]

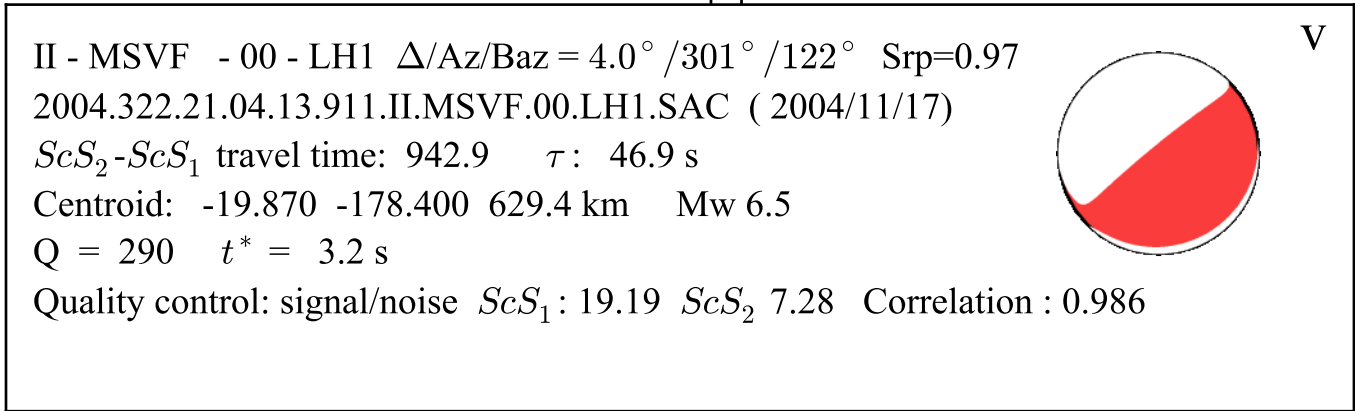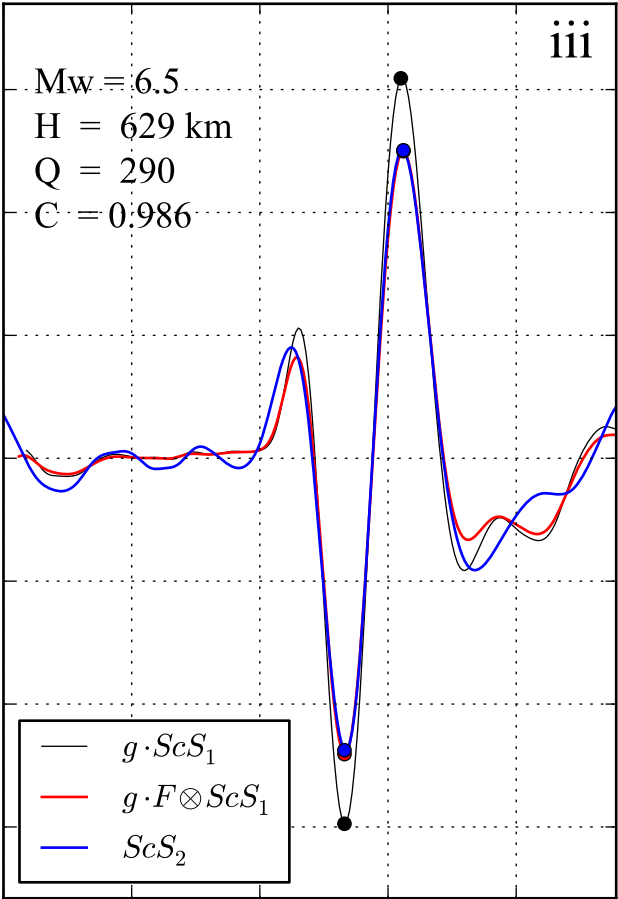

Time [s]

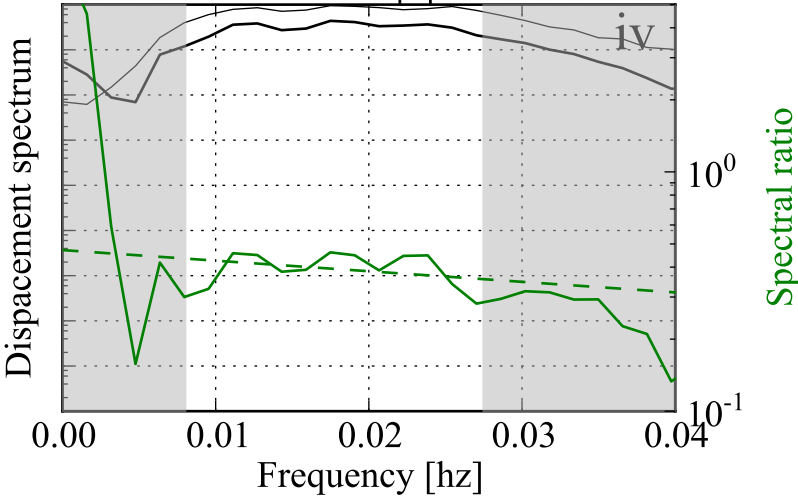

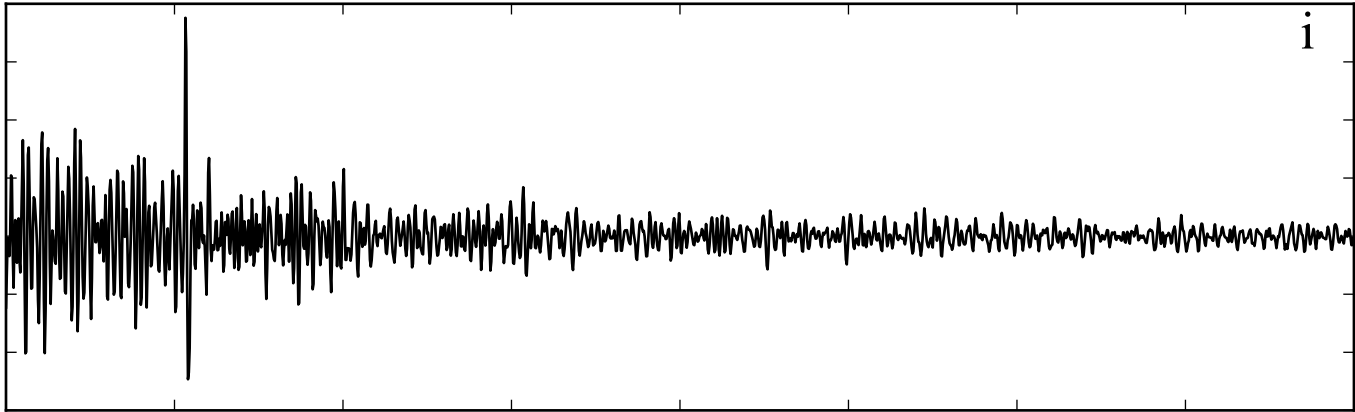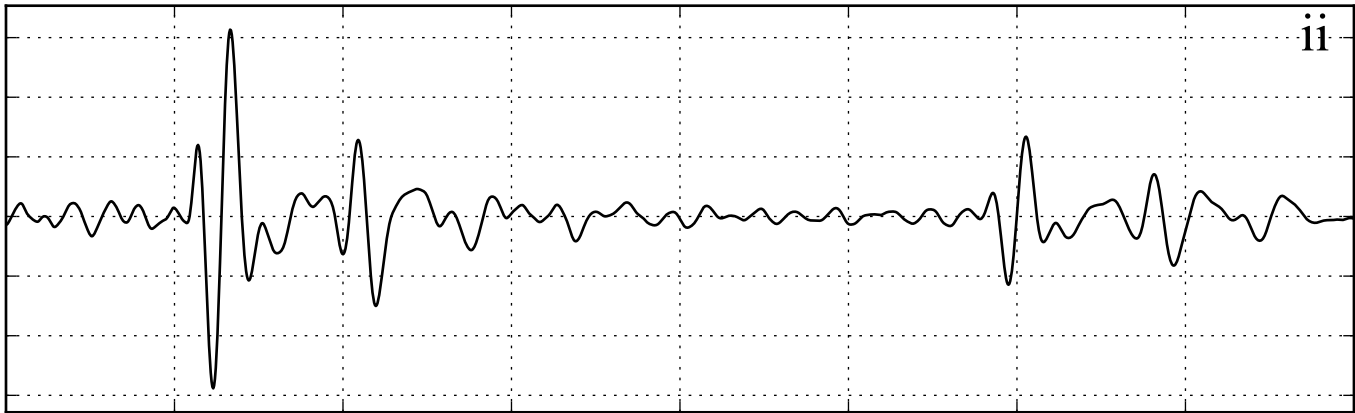

Time [s]

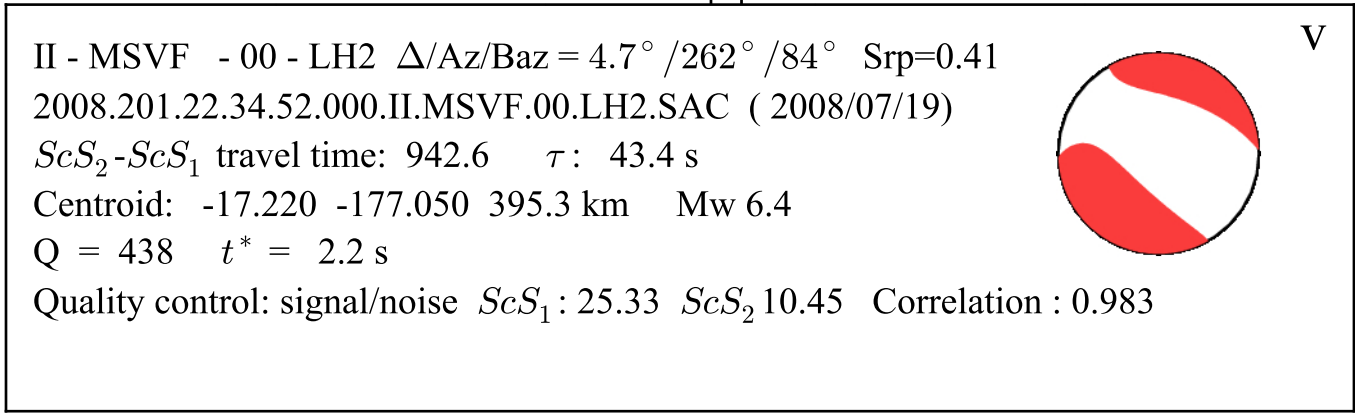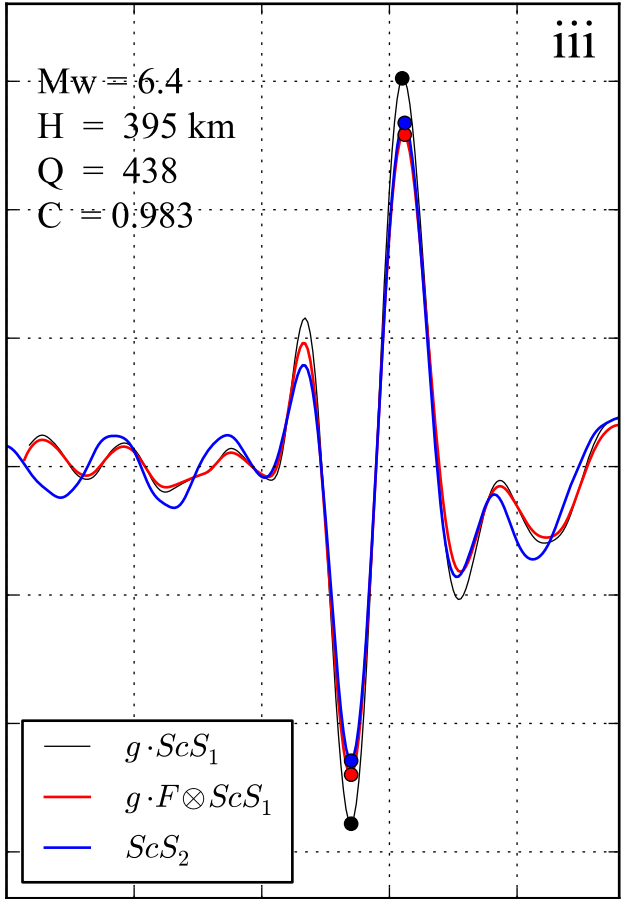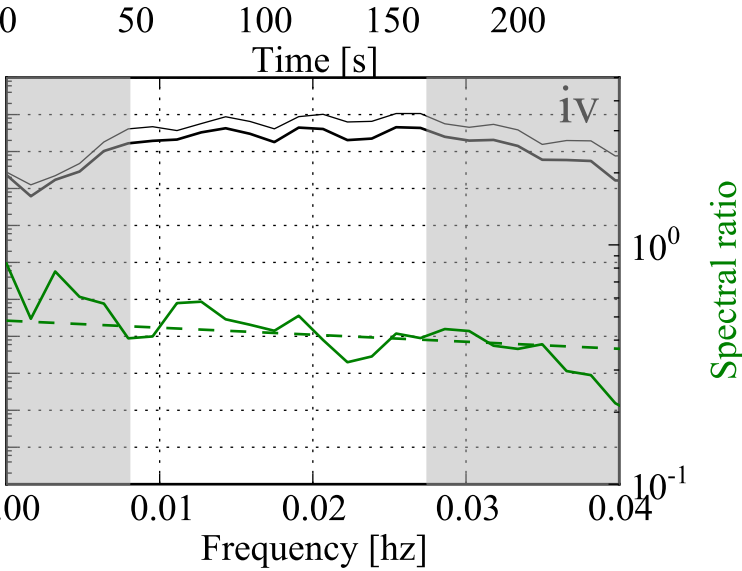

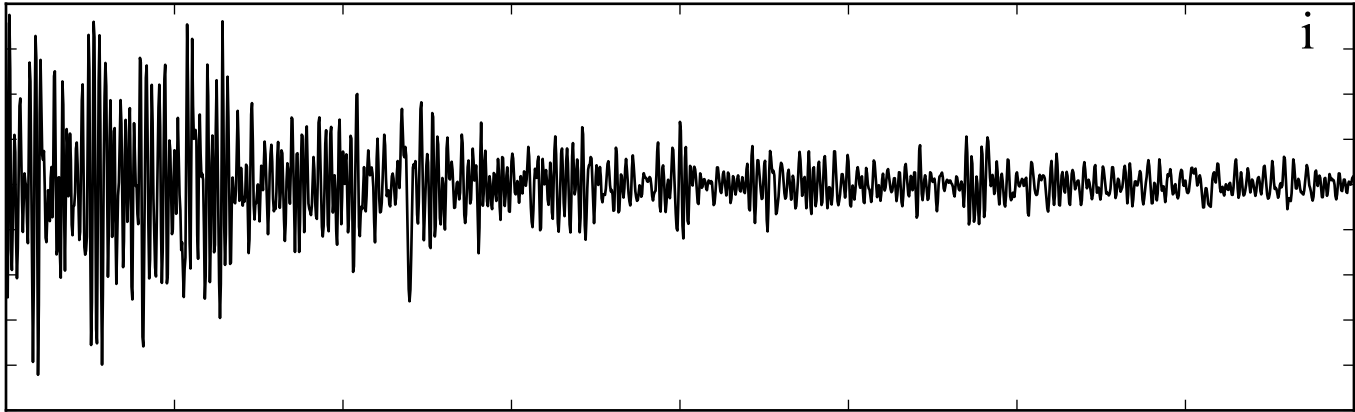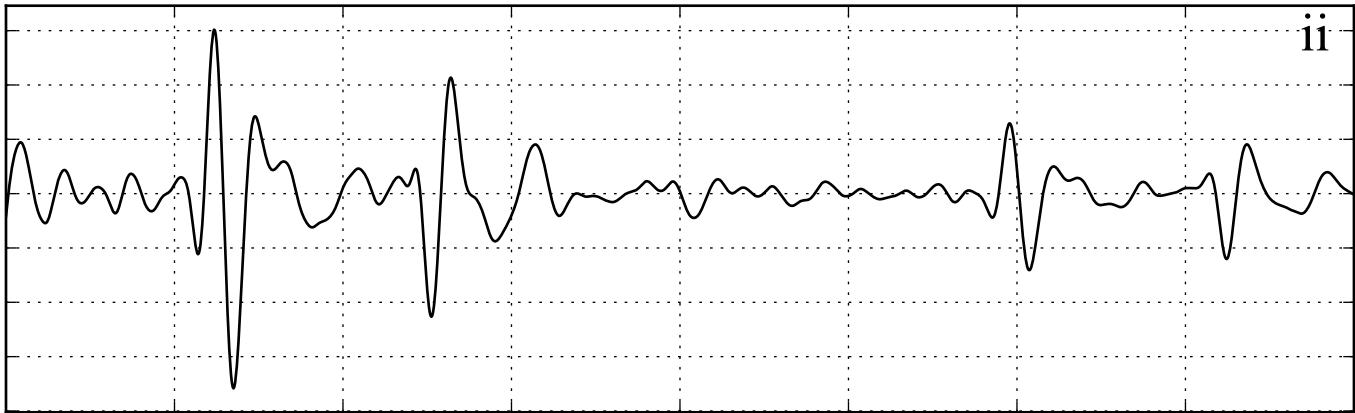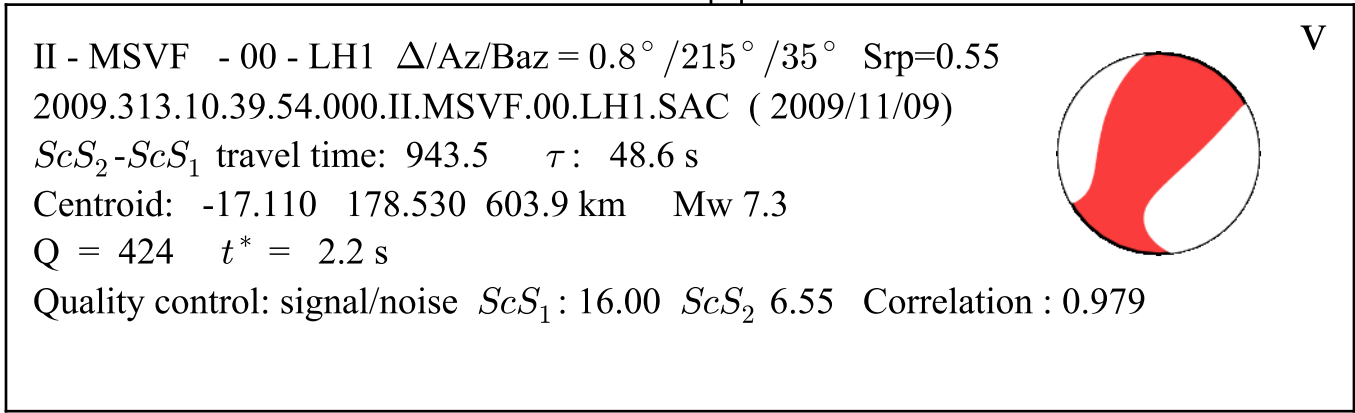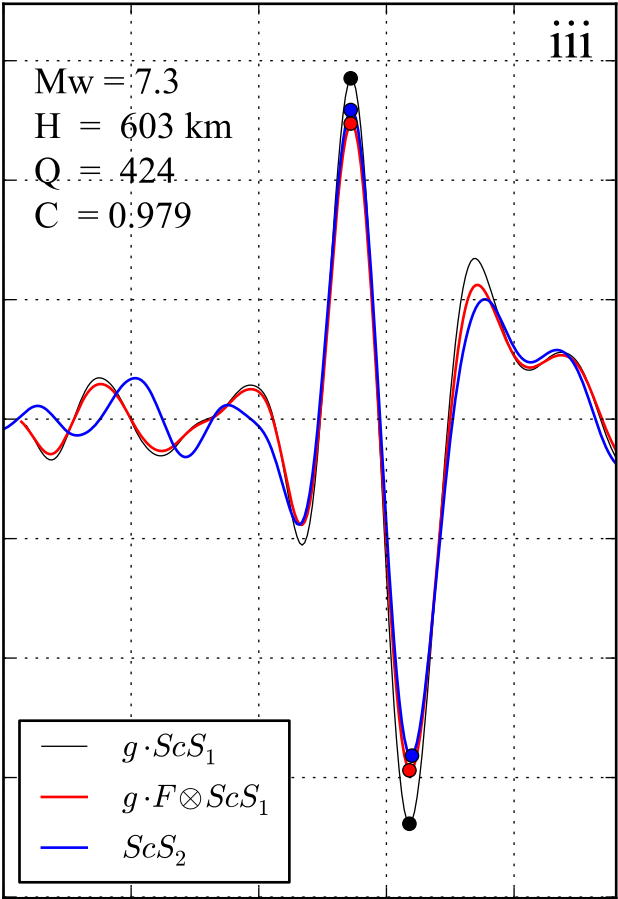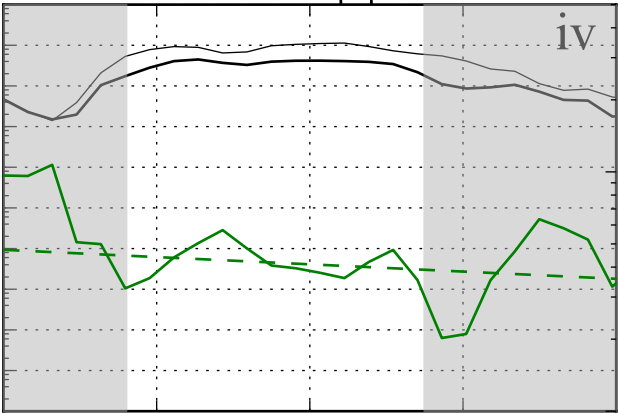



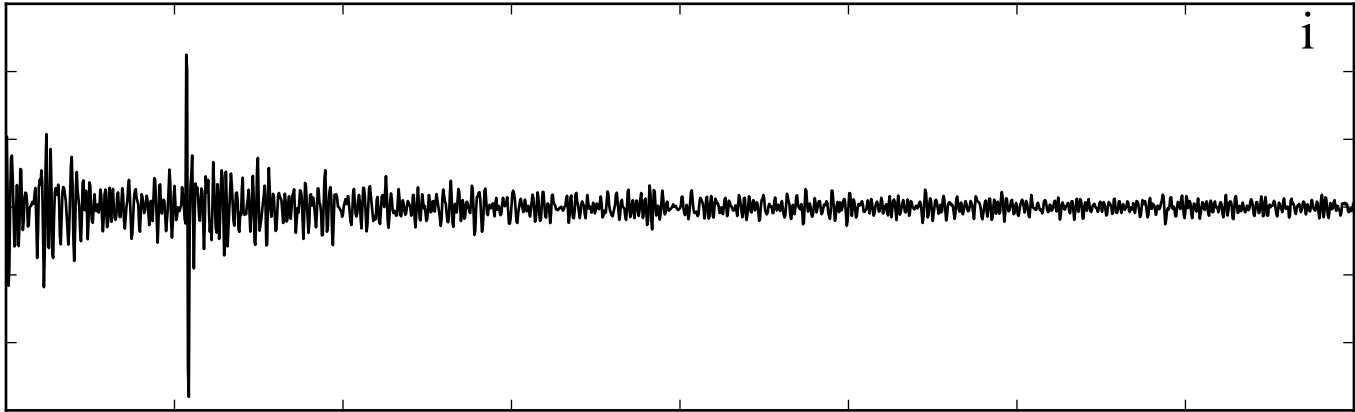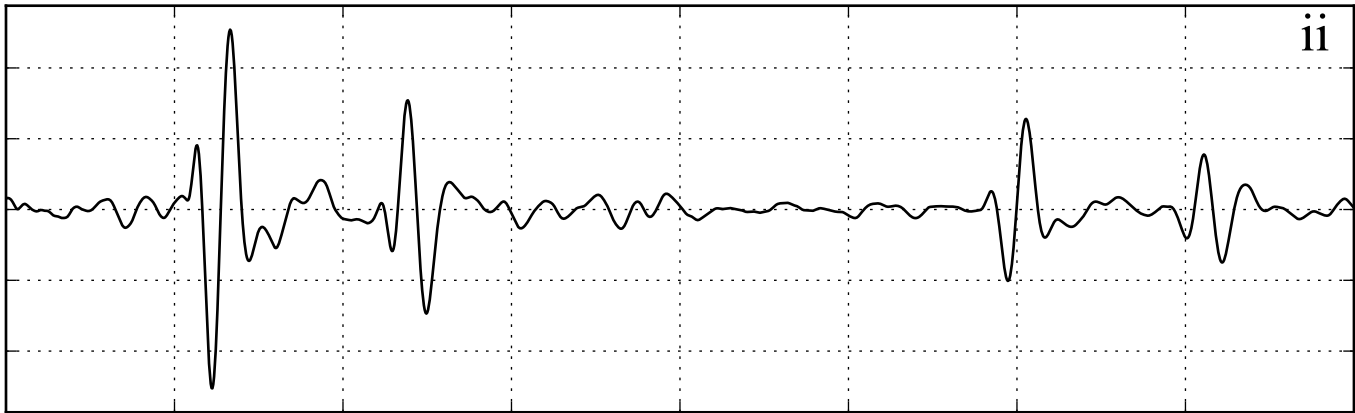

Time [s]

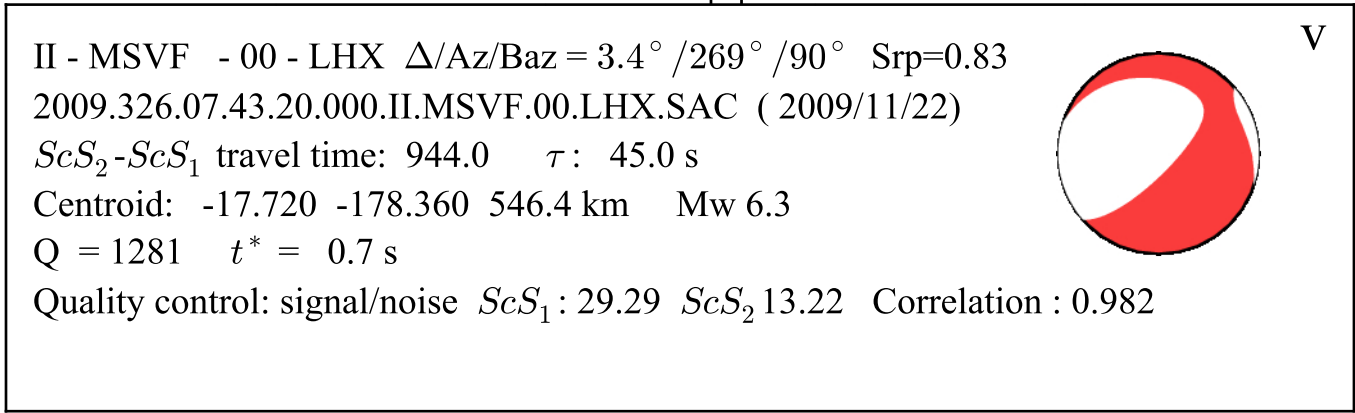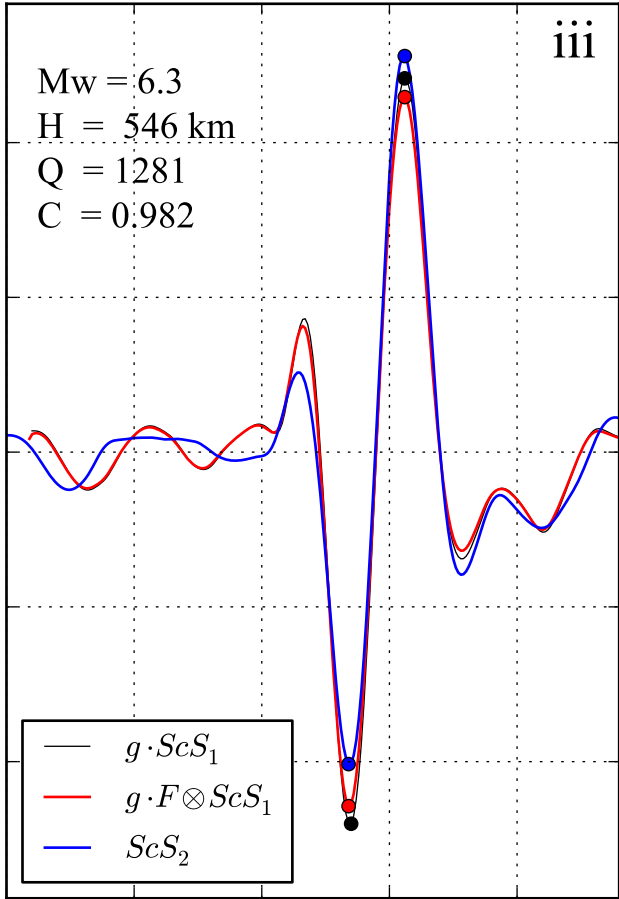

Time [s]

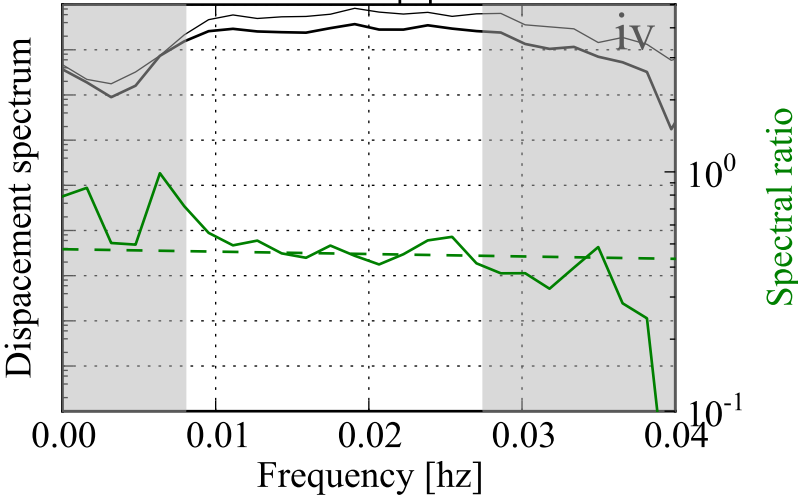

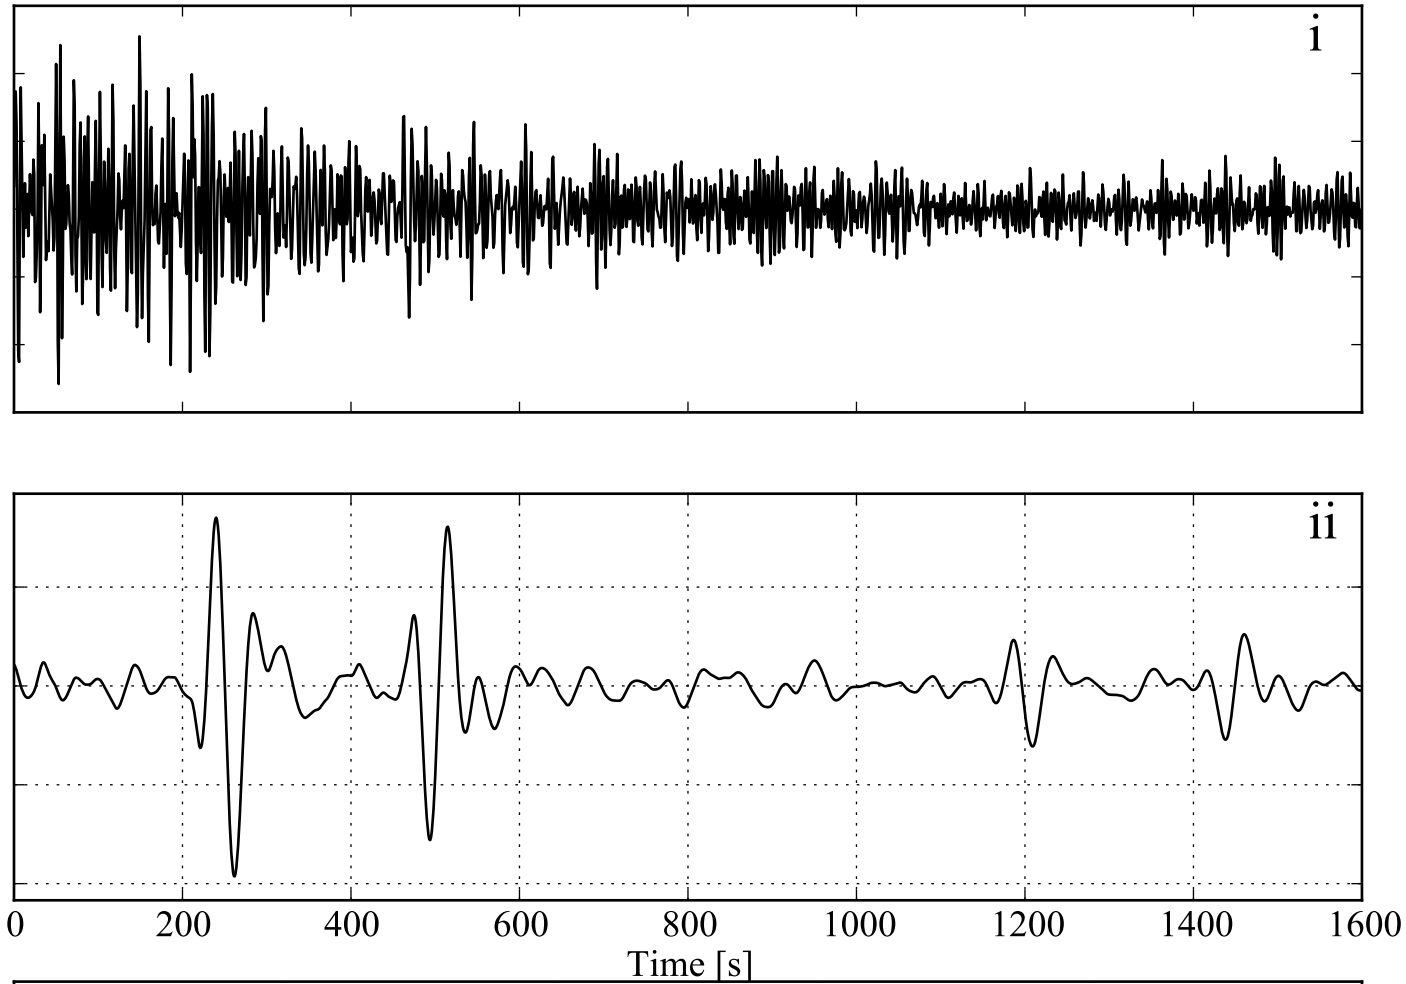

II - MSVF - 00 - LH2  $\Delta/Az/Baz = 4.3^\circ / 313^\circ / 134^\circ$   $Srp=0.67$   
 2010.228.19.30.49.000.II.MSVF.00.LH2.SAC (2010/08/16)  
 $ScS_2$ - $ScS_1$  travel time: 946.8  $\tau$ : 45.8 s  
 Centroid: -20.740 -178.670 604.0 km Mw 6.2  
 $Q = 135$   $t^* = 7.0$  s  
 Quality control: signal/noise  $ScS_1$ : 12.46  $ScS_2$  3.70 Correlation : 0.950

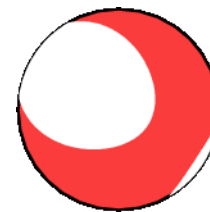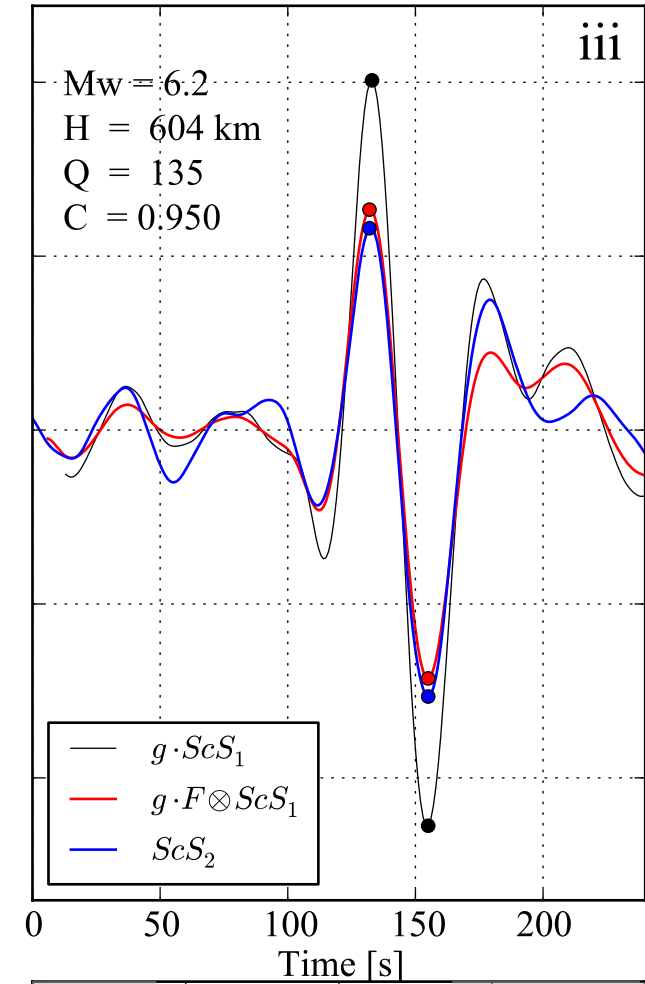

Mw = 6.2  
 H = 604 km  
 $Q = 135$   
 $C = 0.950$

$g \cdot ScS_1$   
 $g \cdot F \otimes ScS_1$   
 $ScS_2$

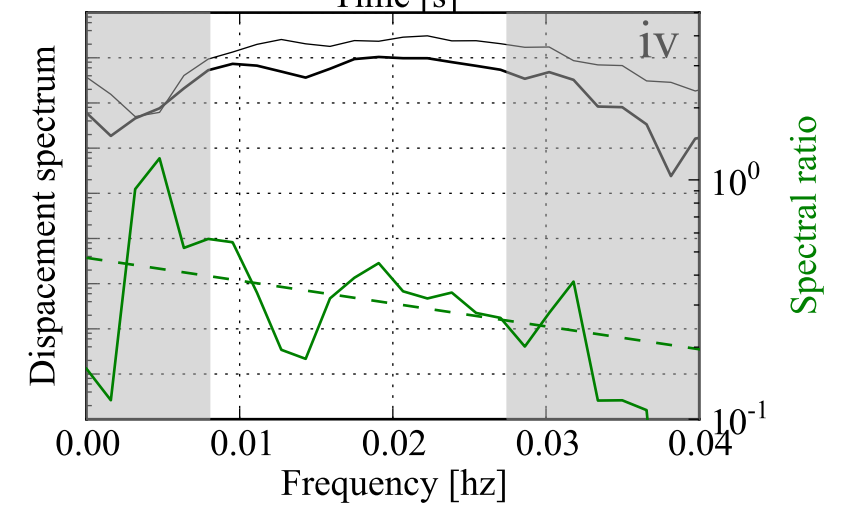

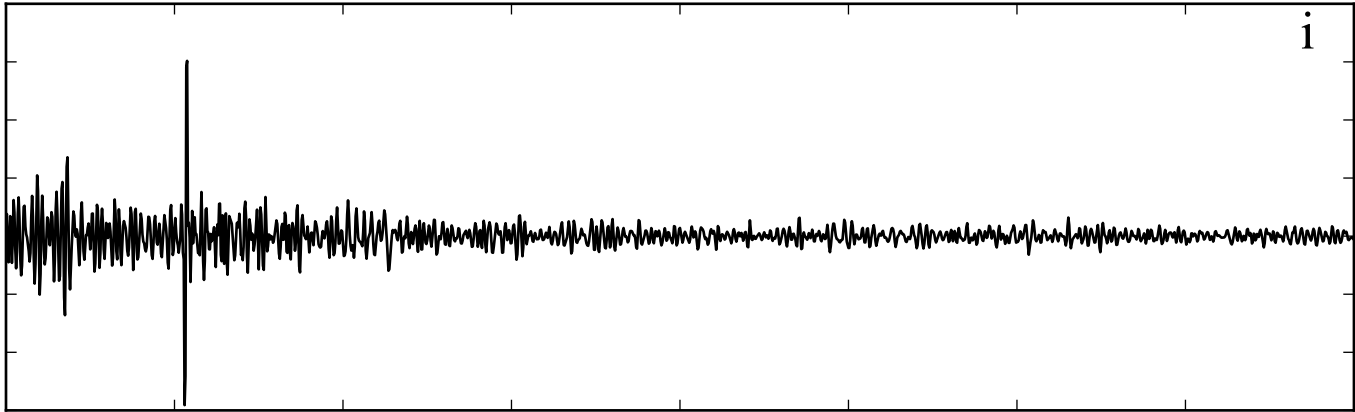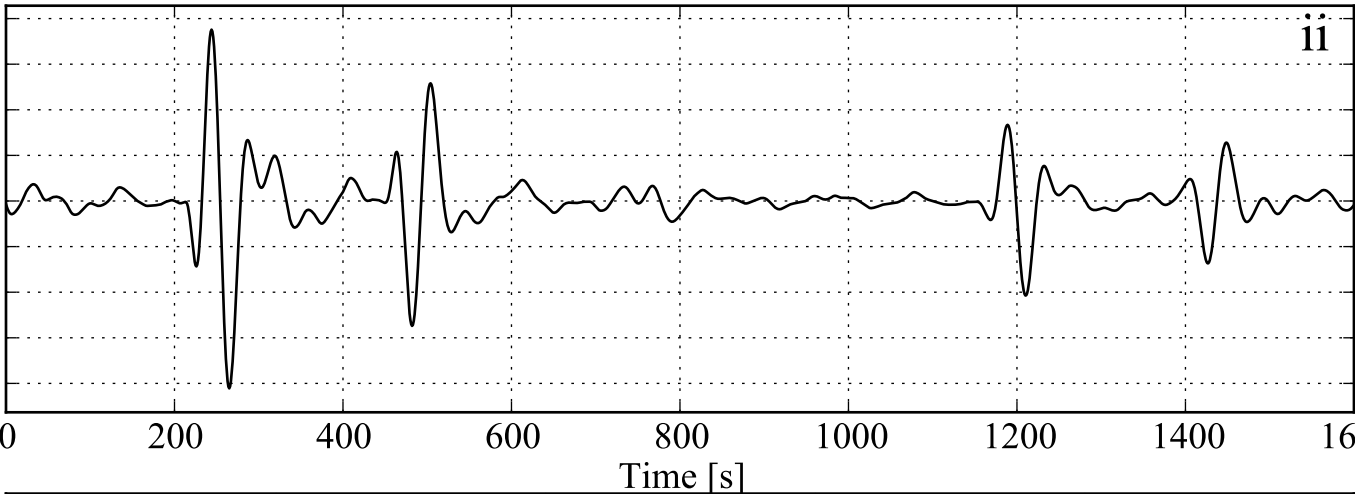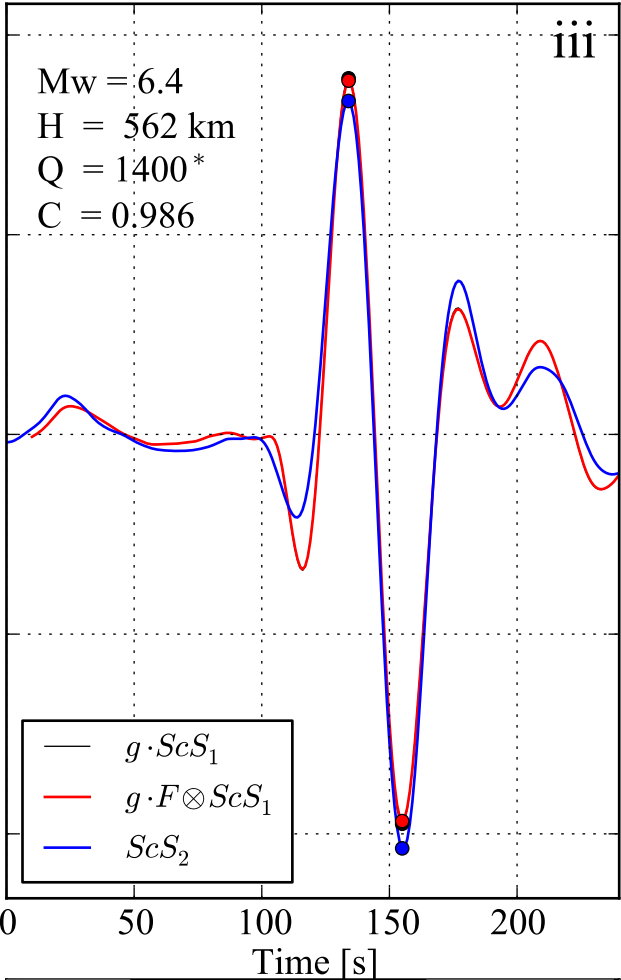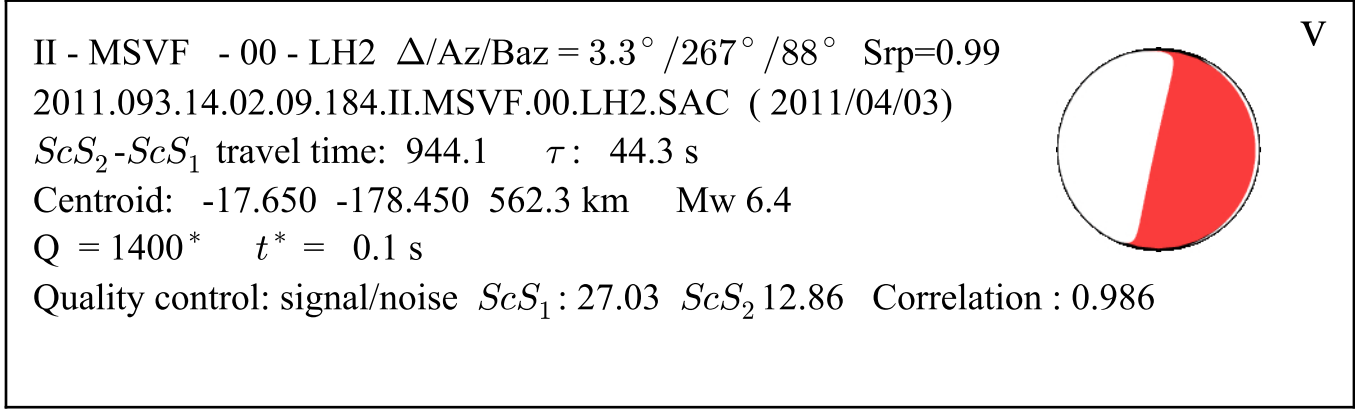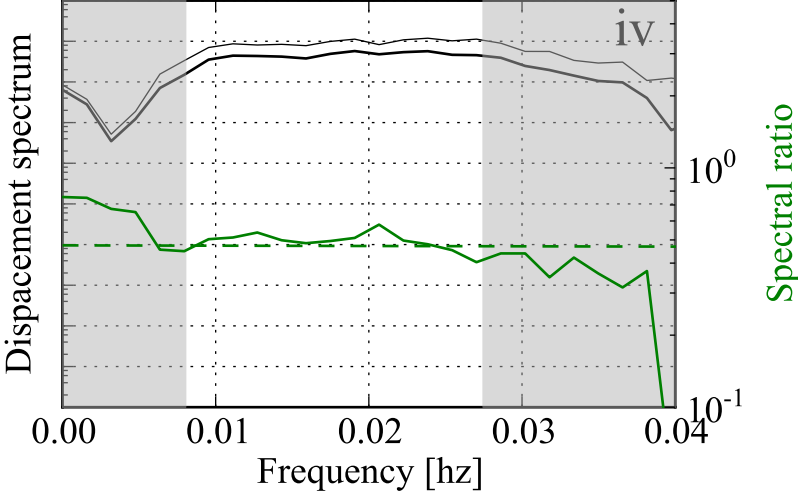

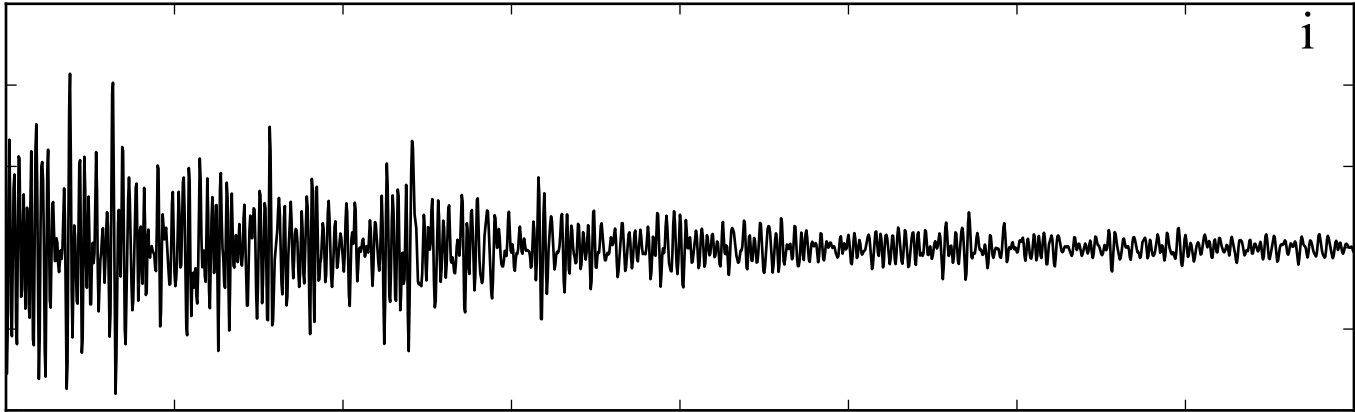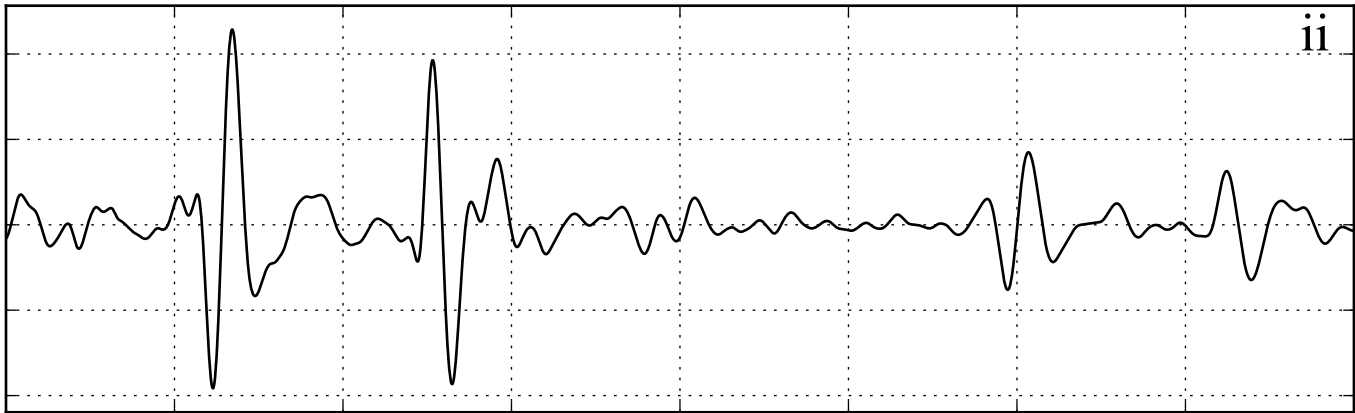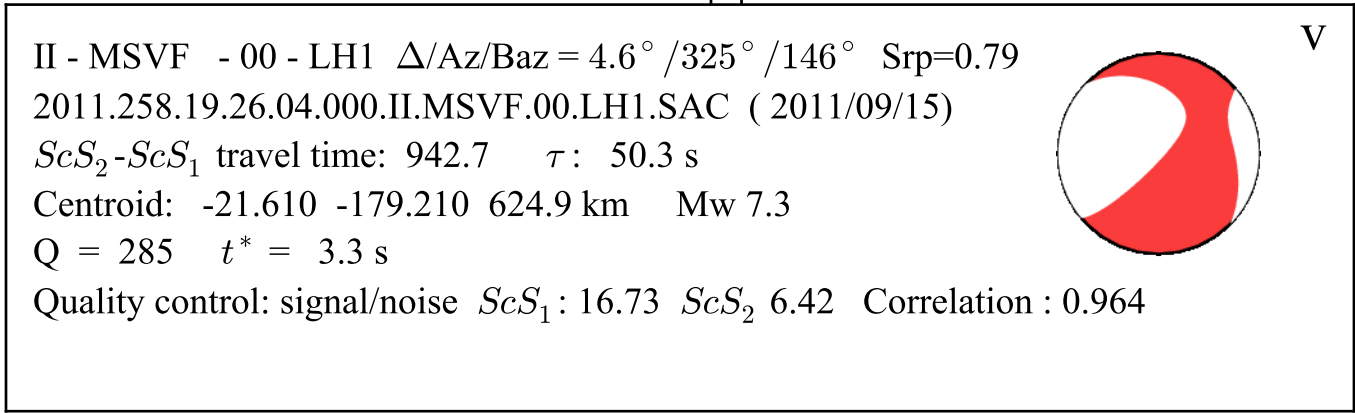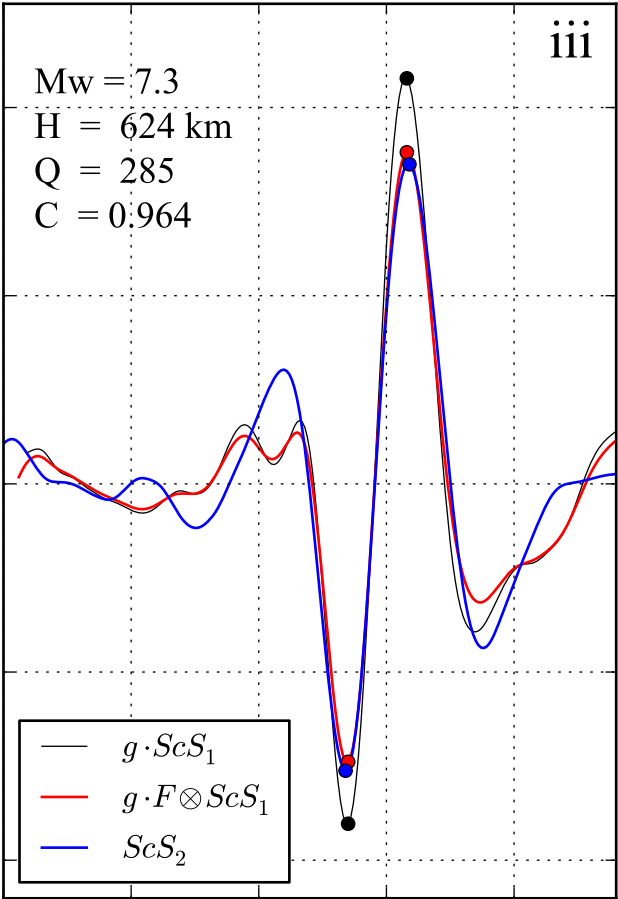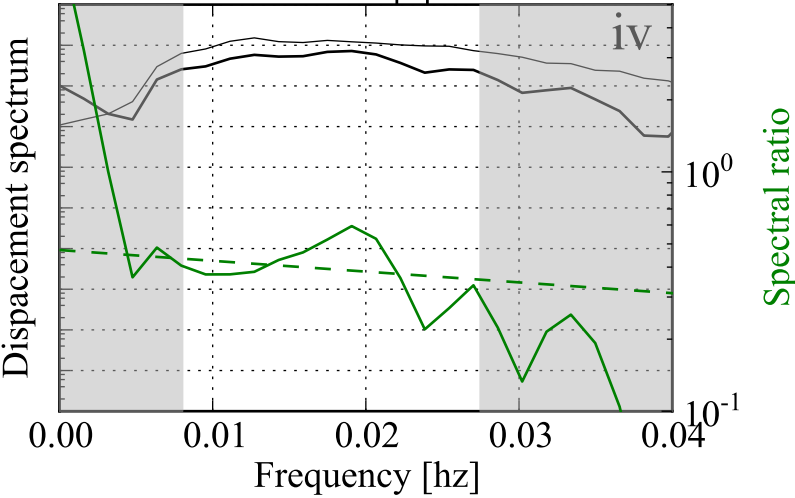

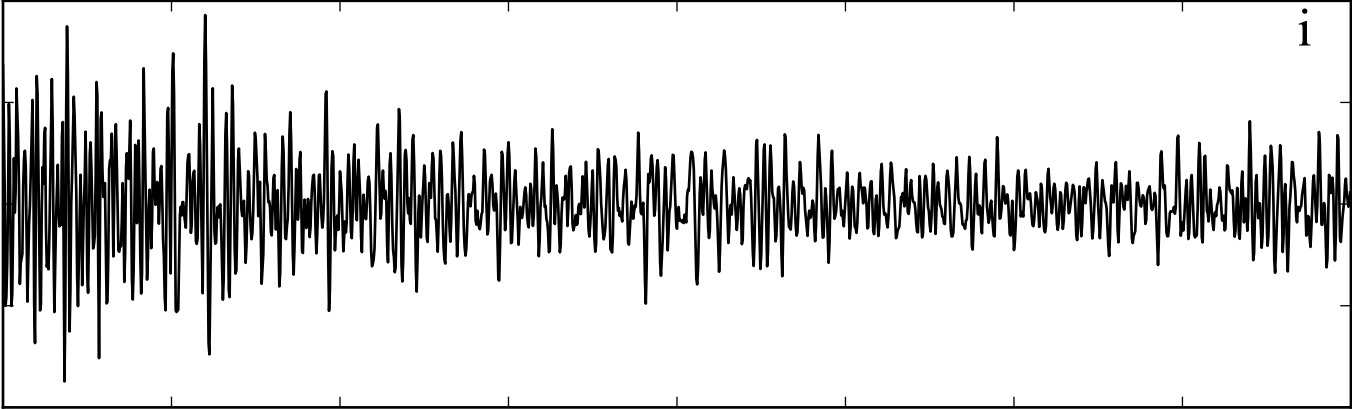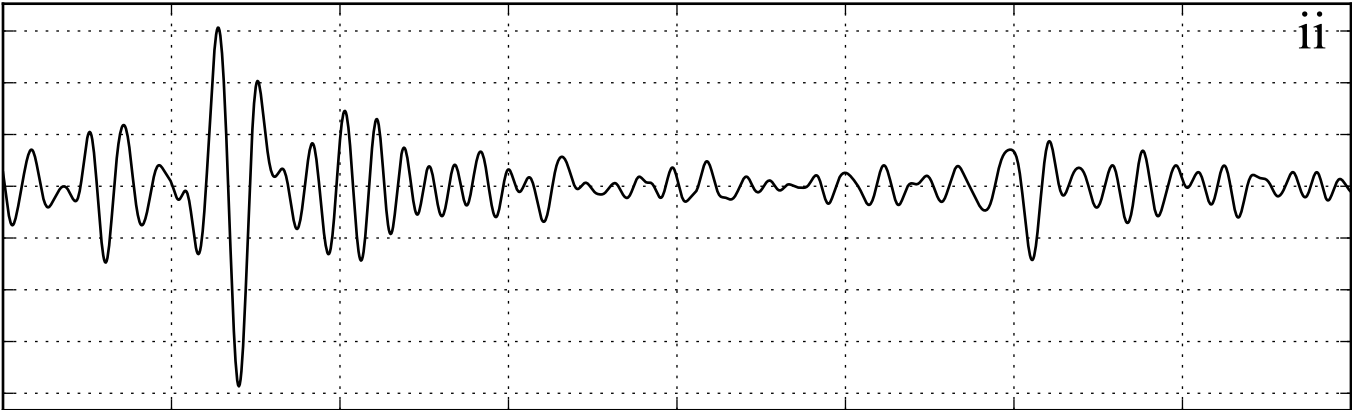

Time [s]

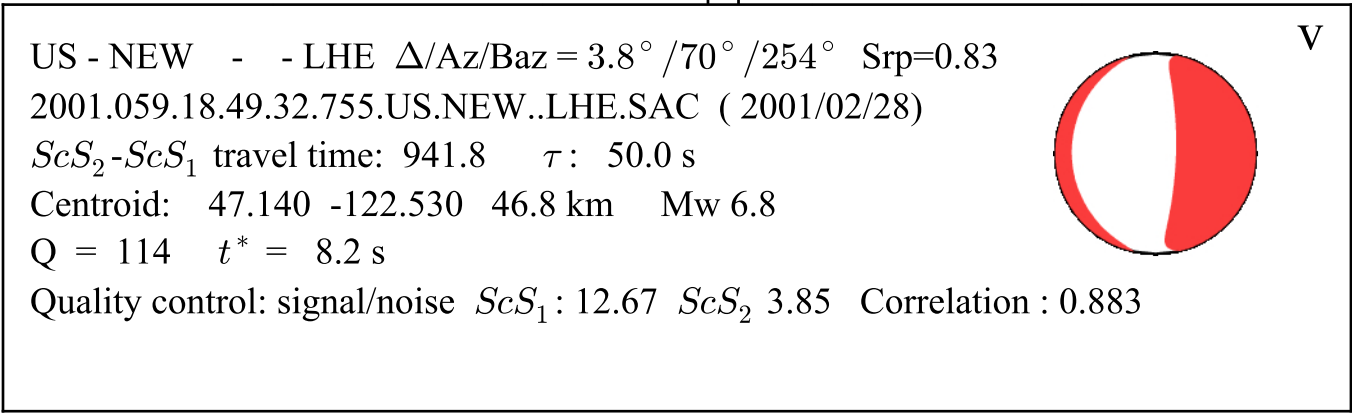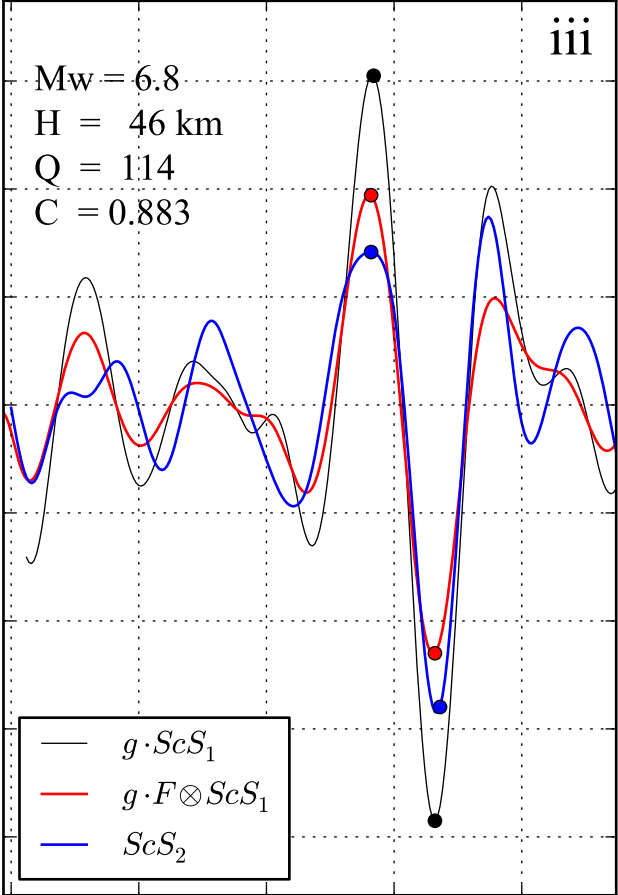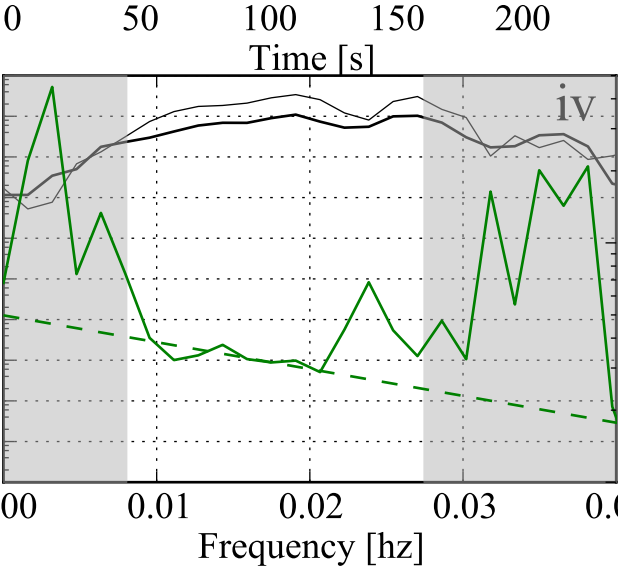

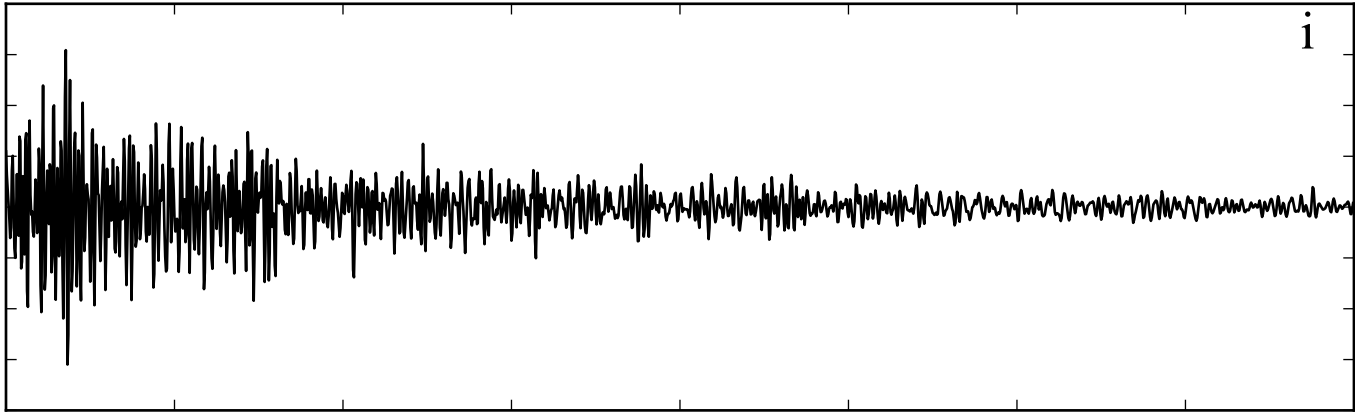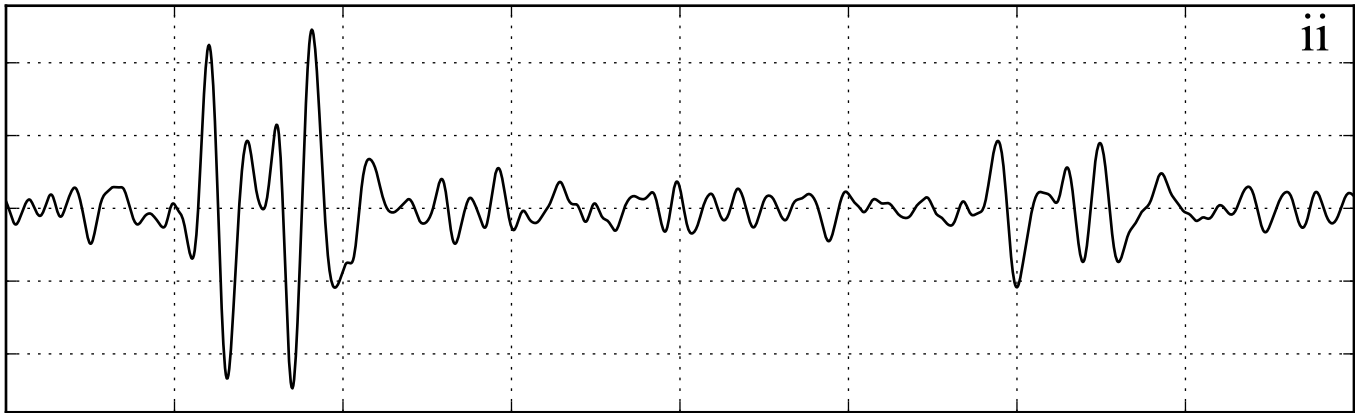

Time [s]

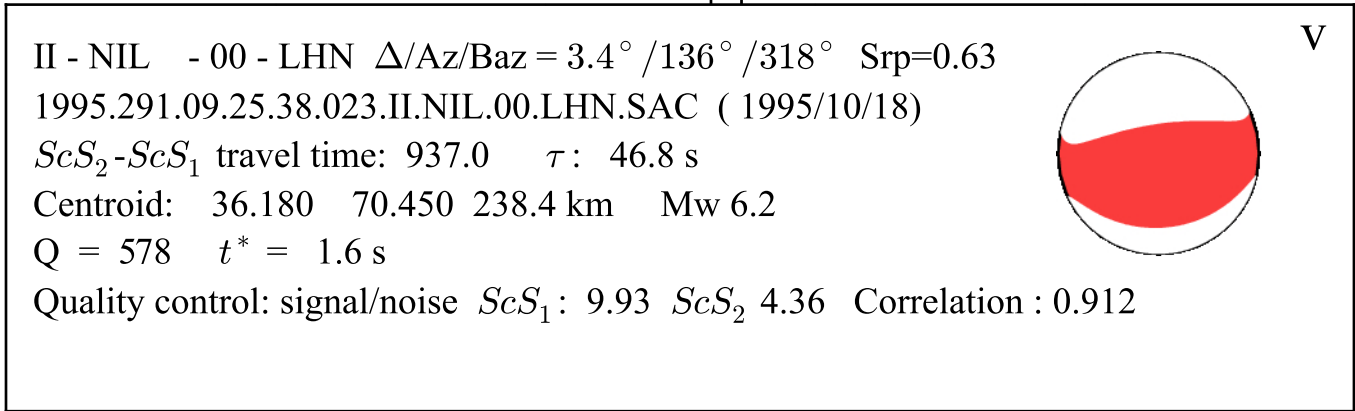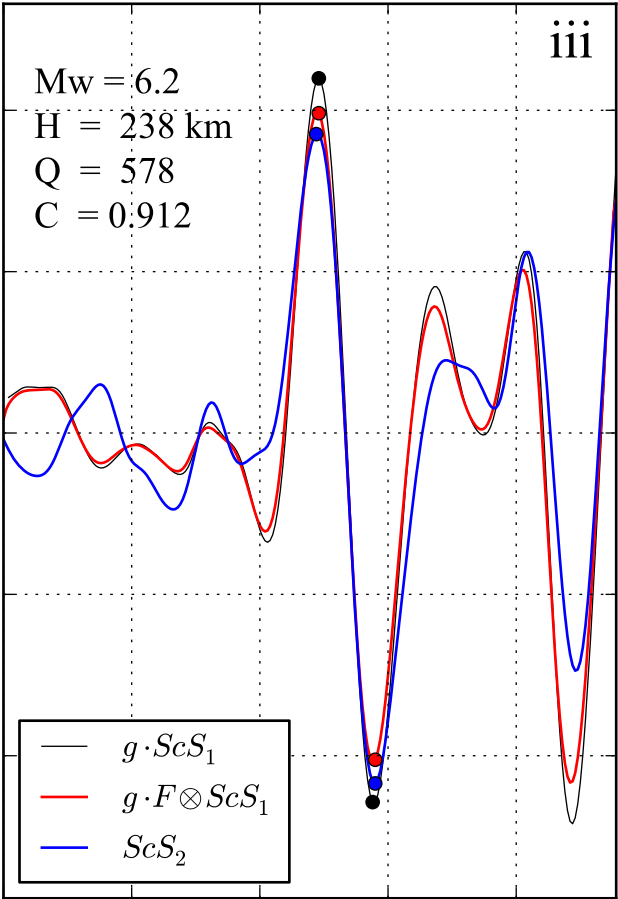

Time [s]

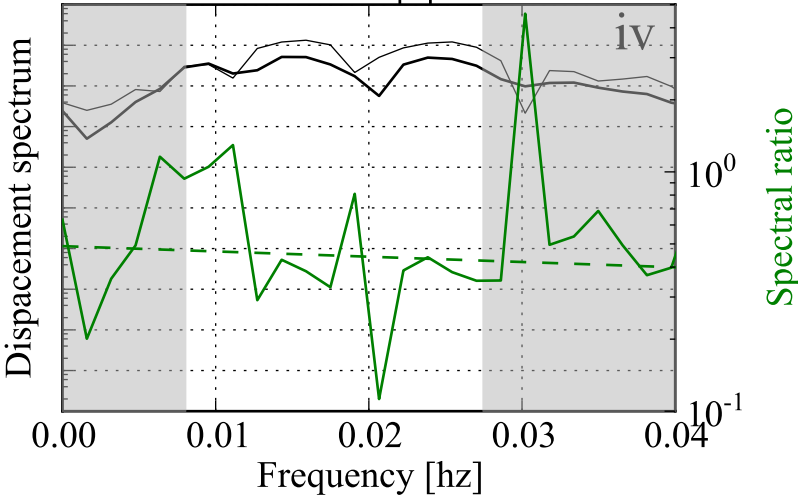

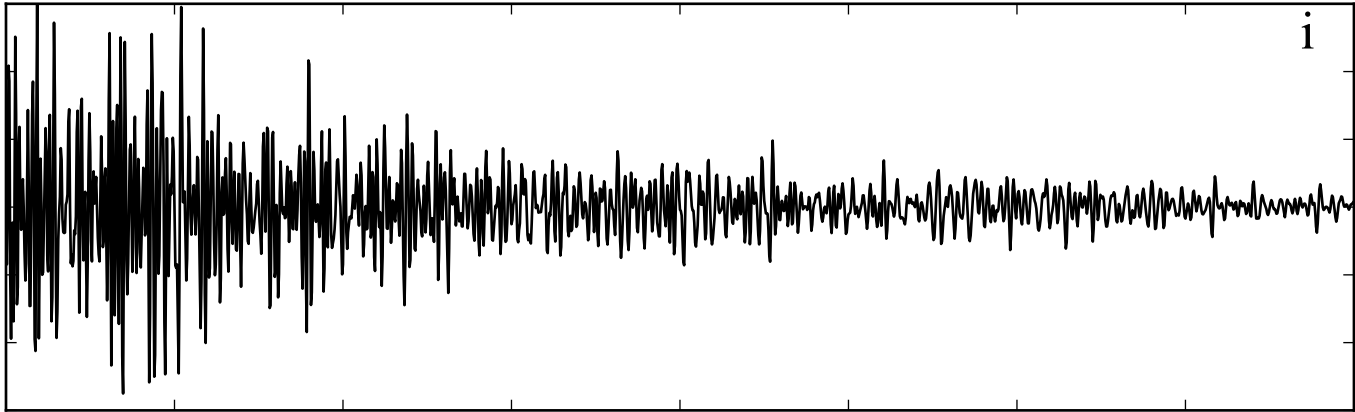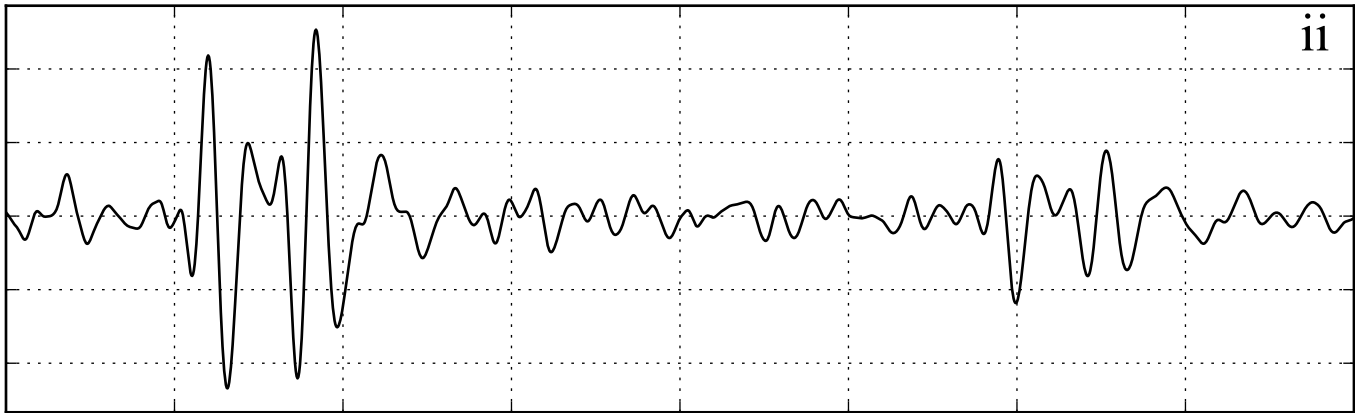

Time [s]

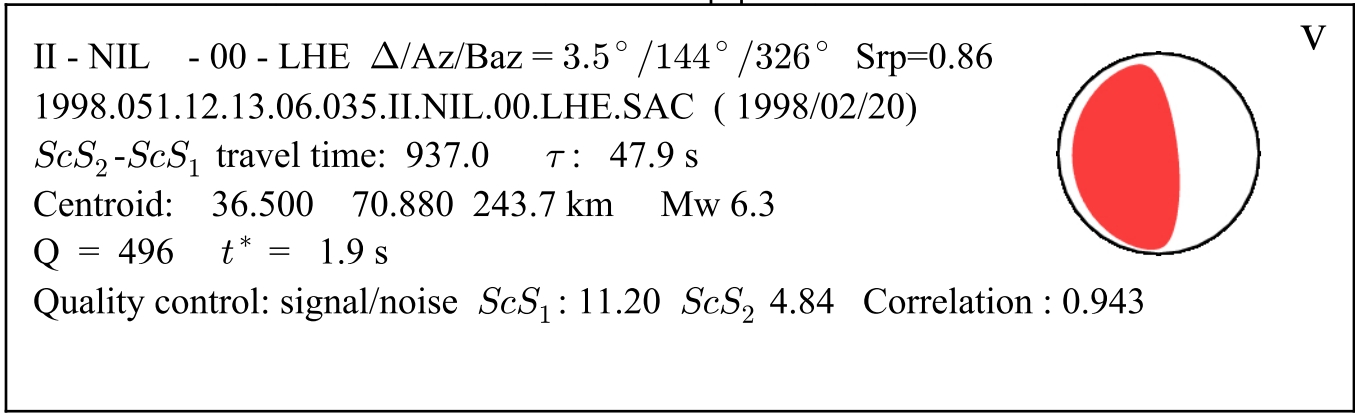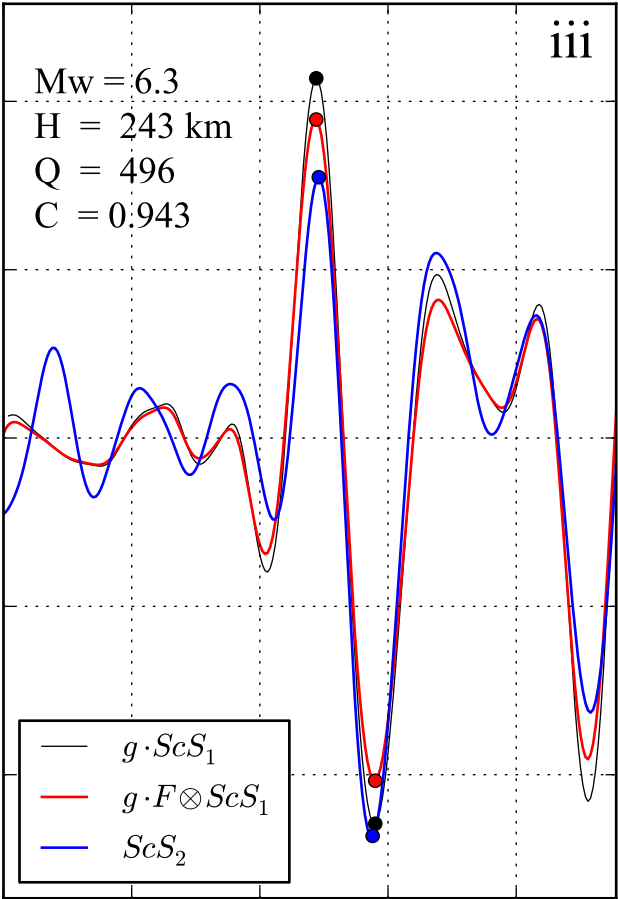

Time [s]

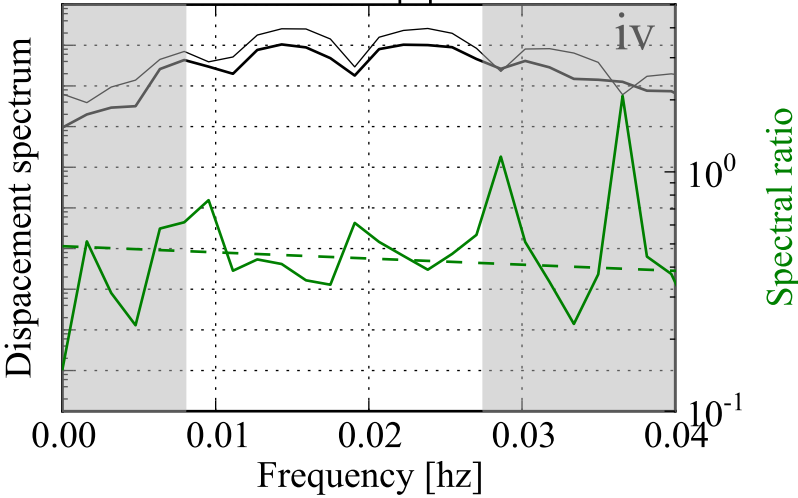

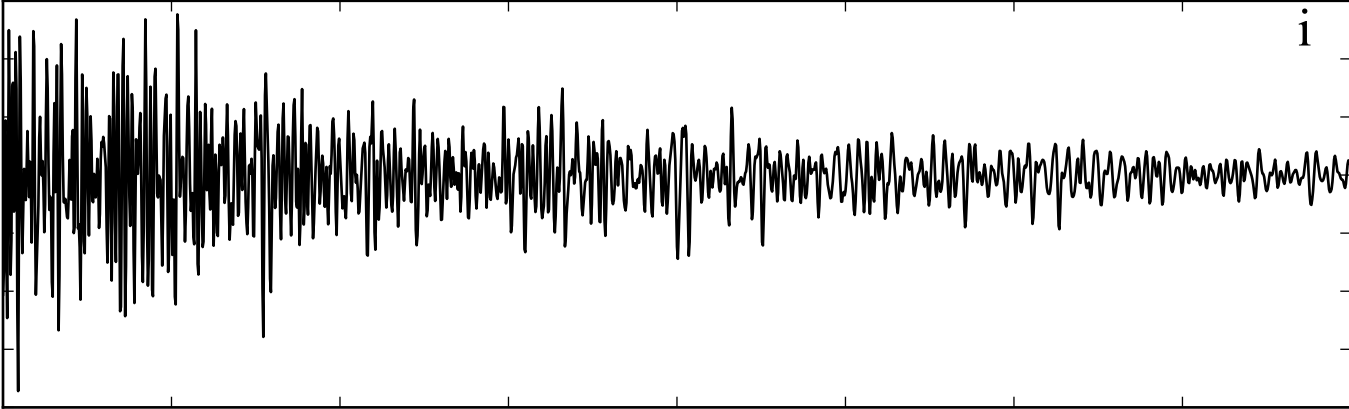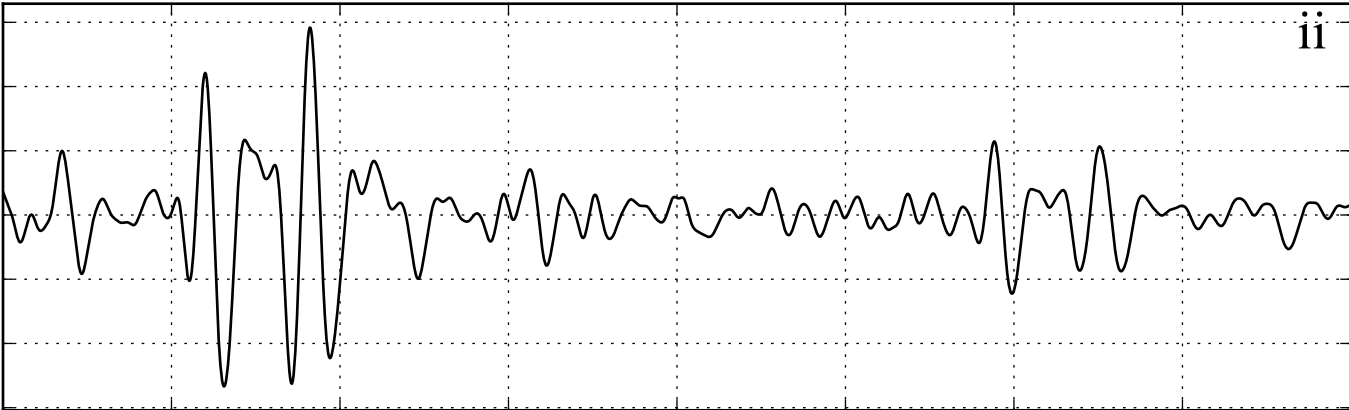

Time [s]

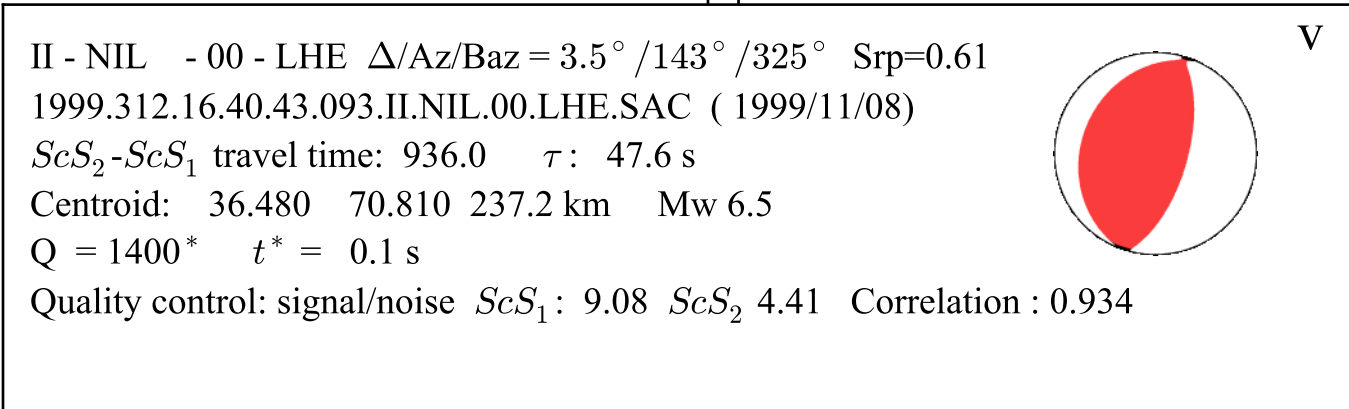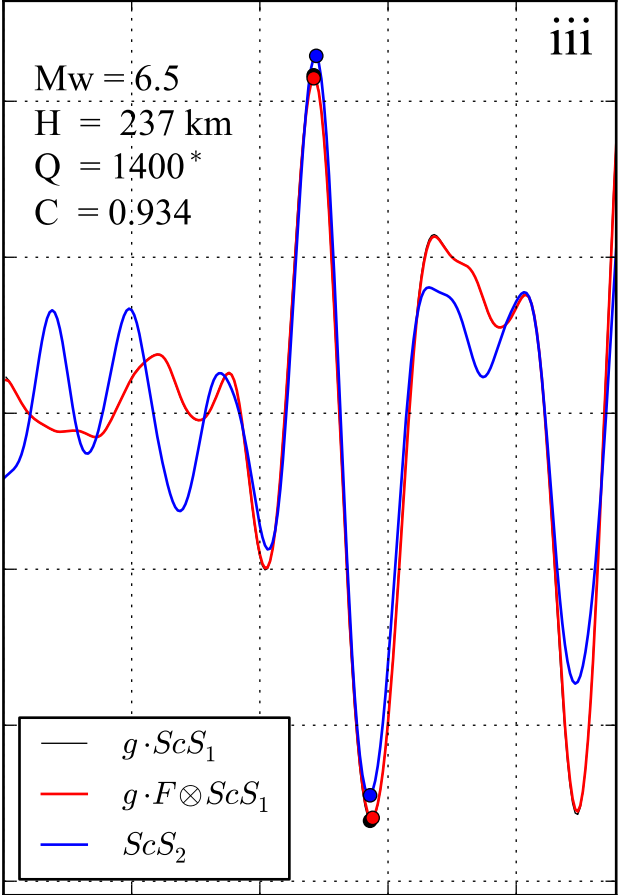

Time [s]

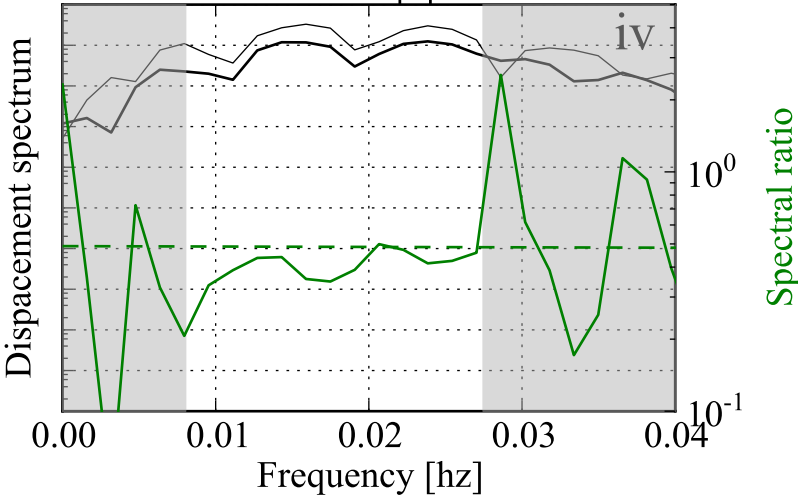



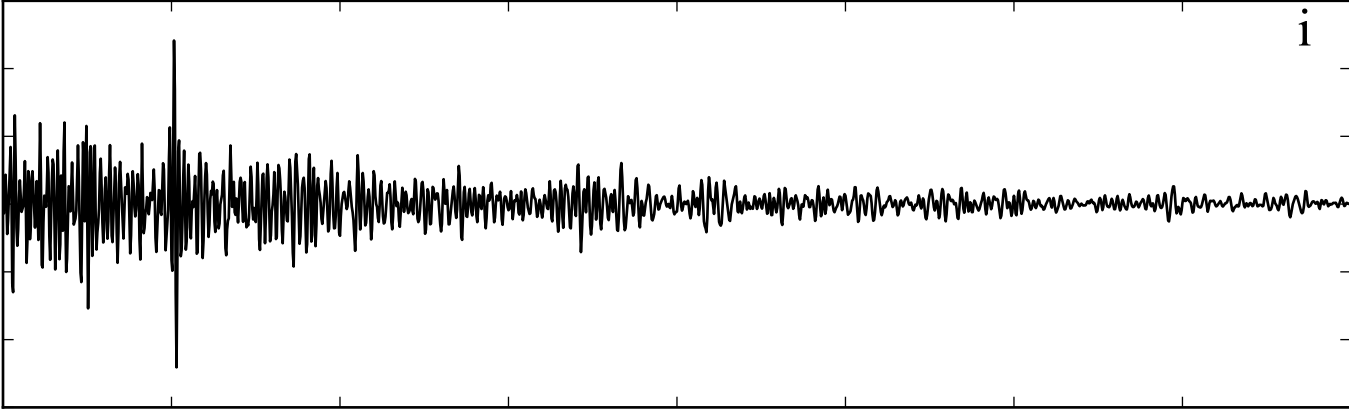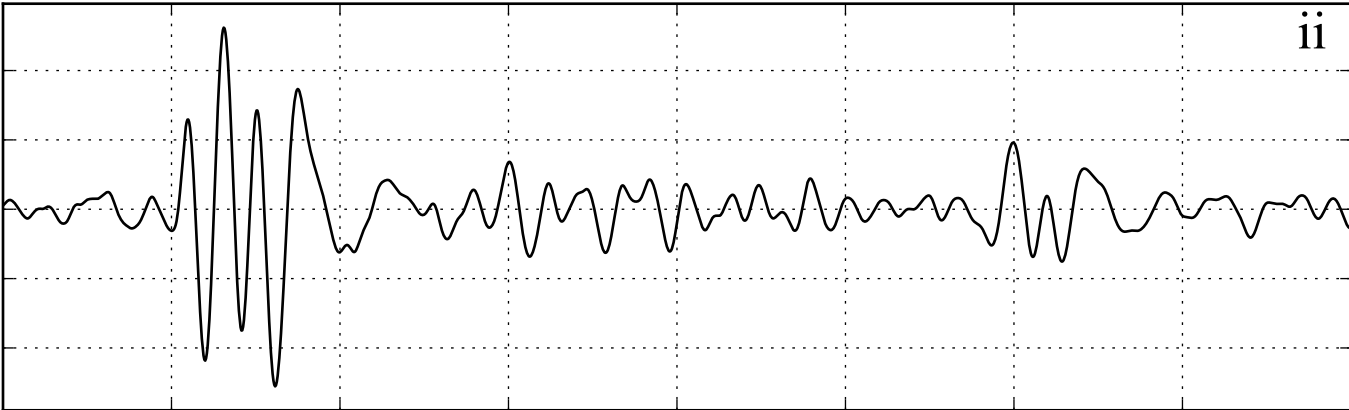

Time [s]

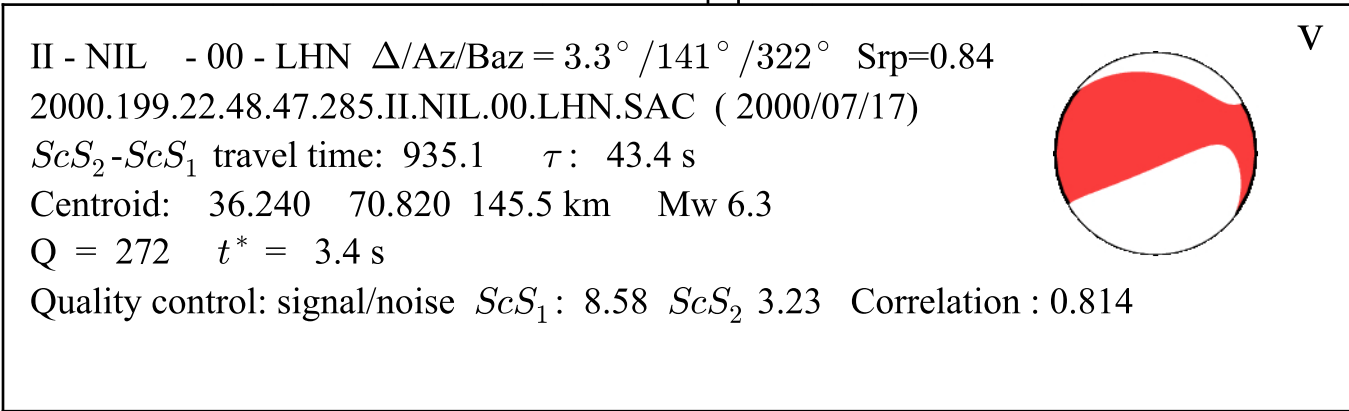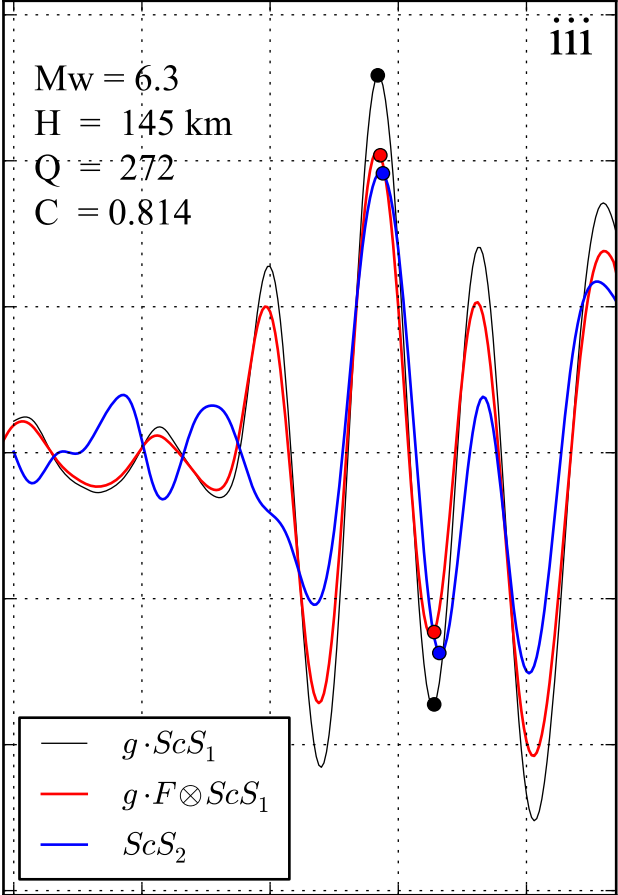

Time [s]

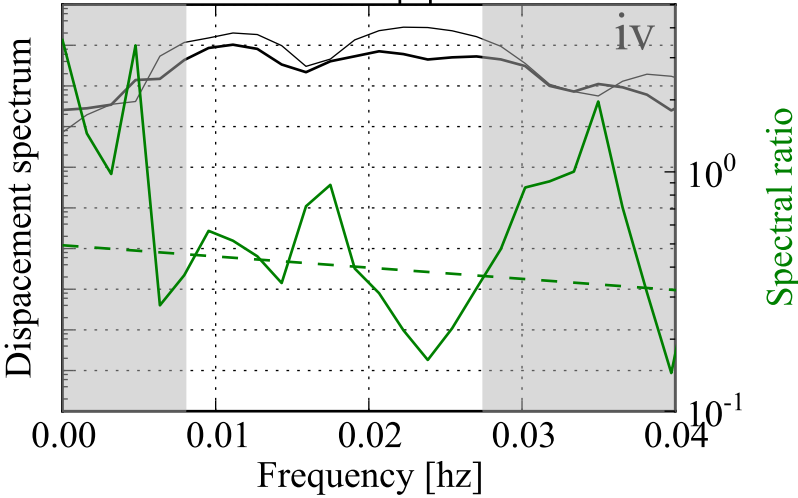

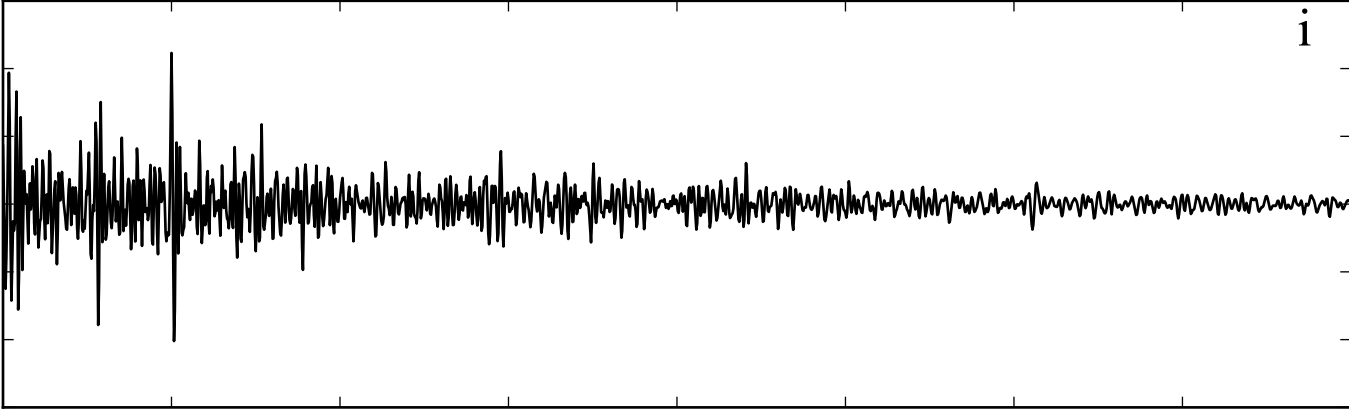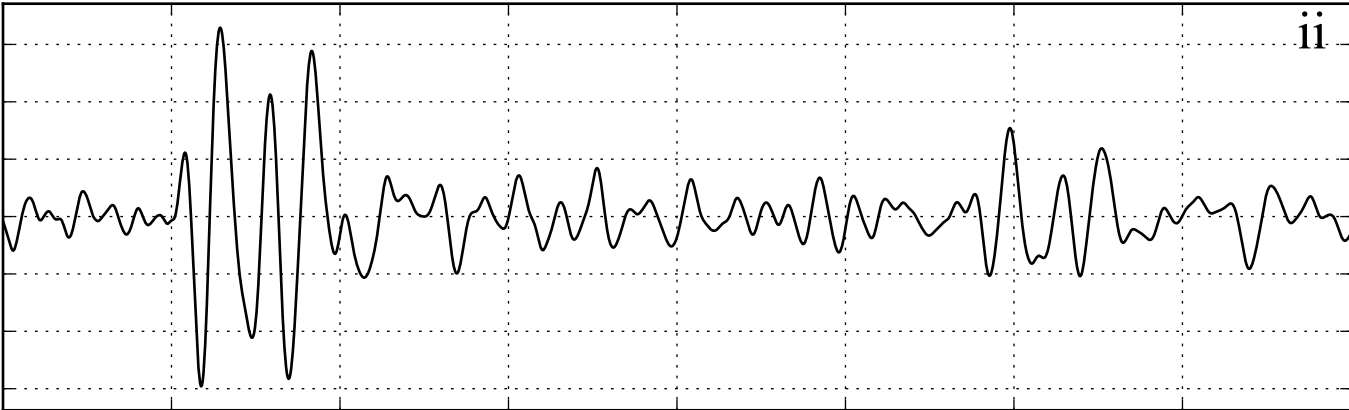

Time [s]

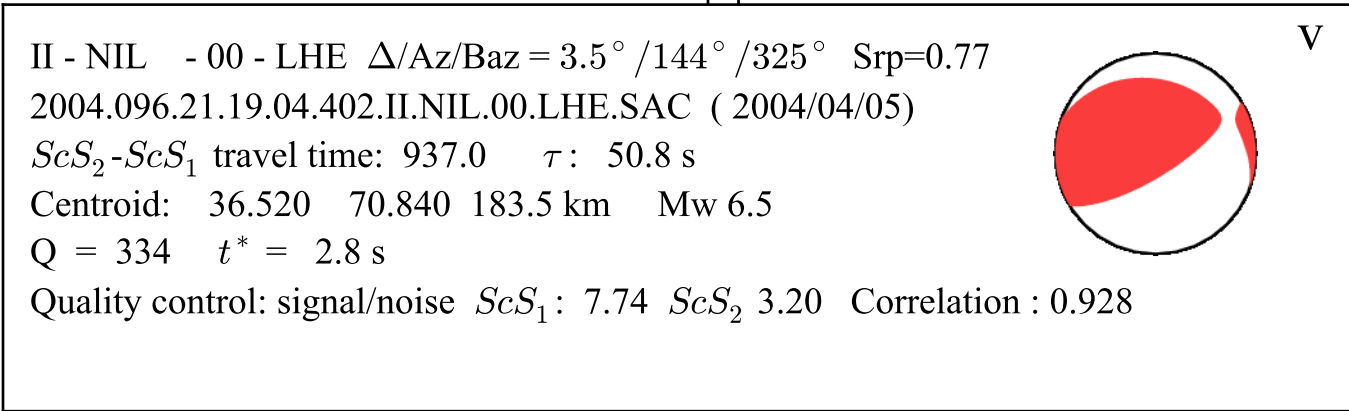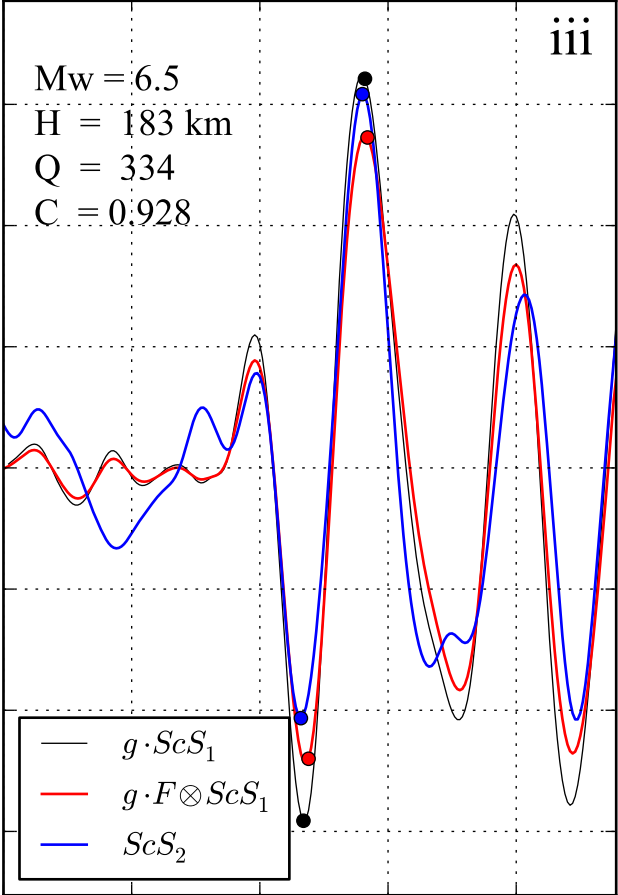

Time [s]

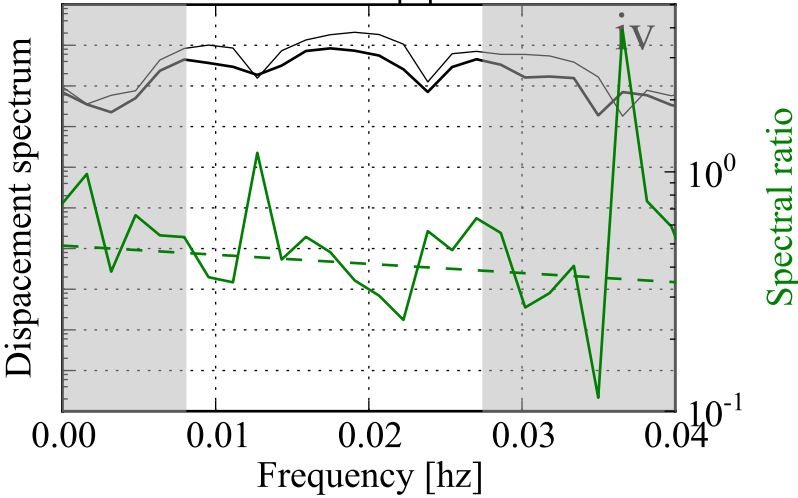

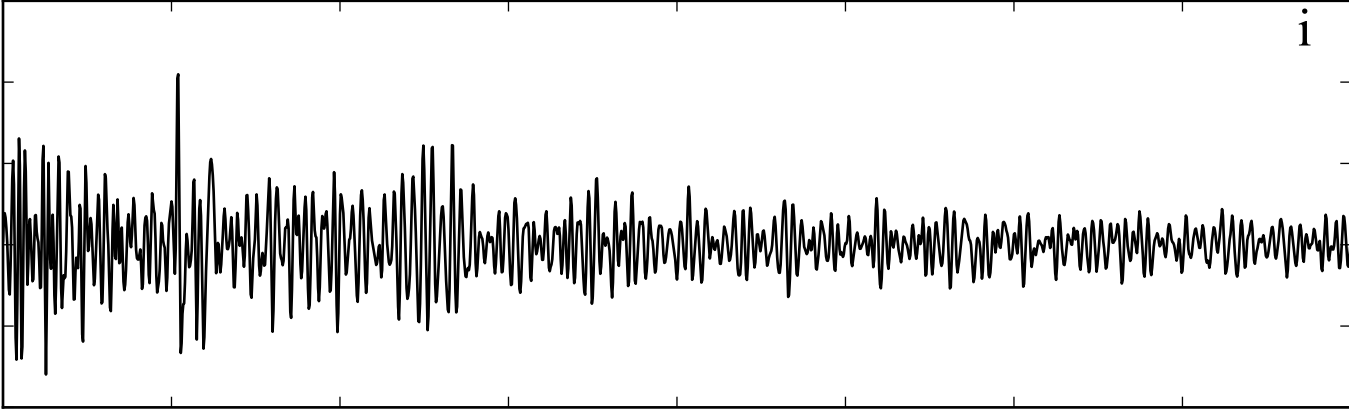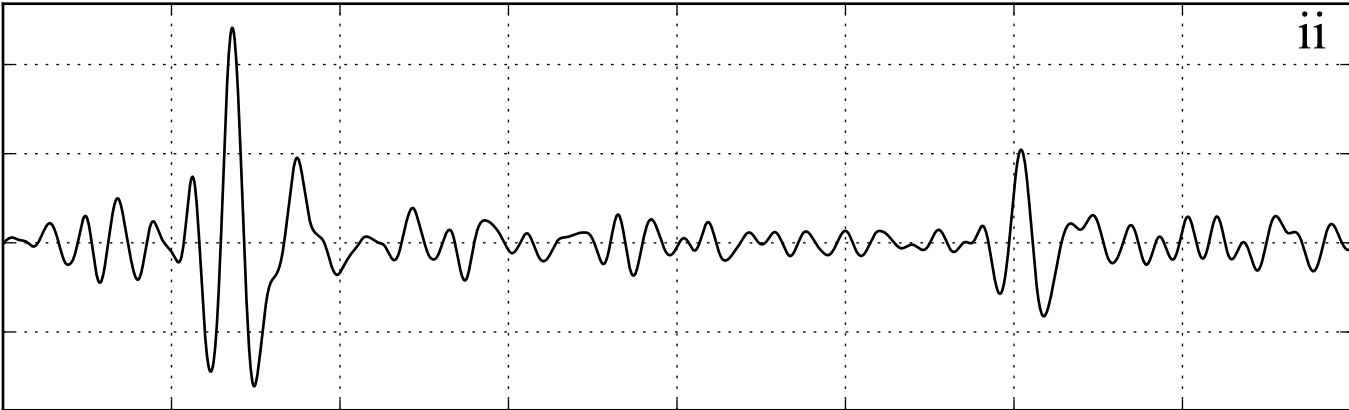

Time [s]

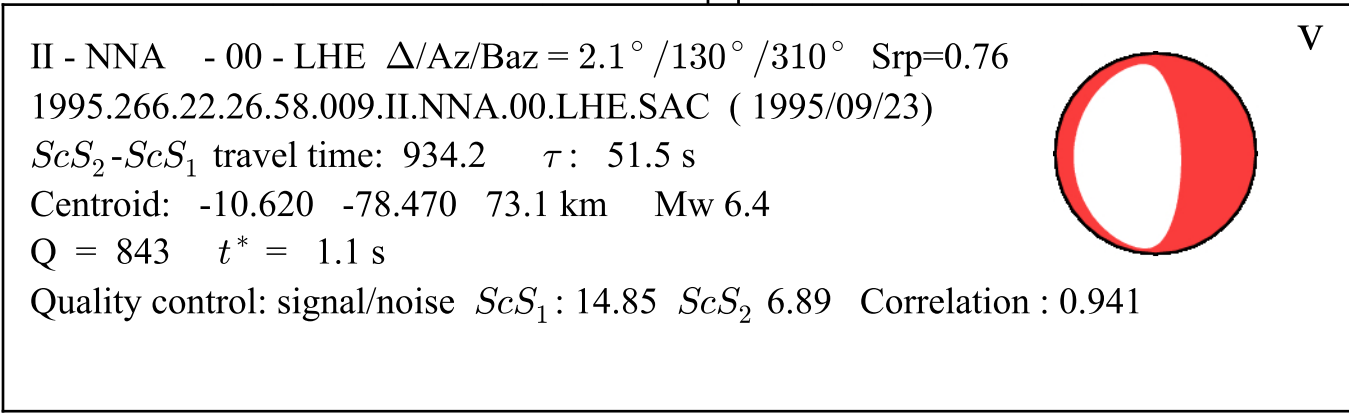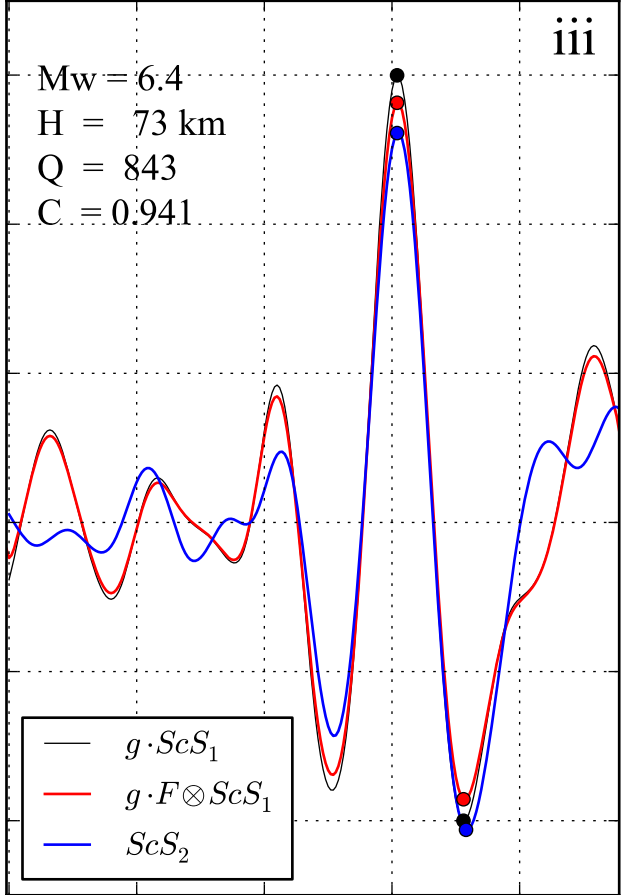

Time [s]

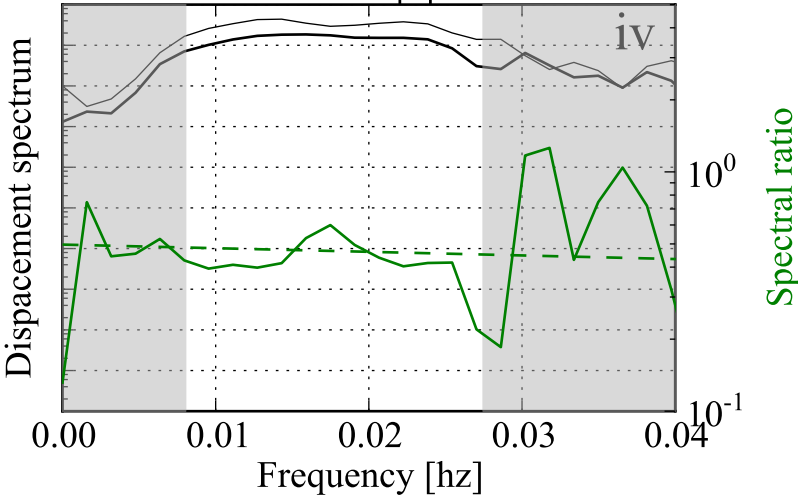

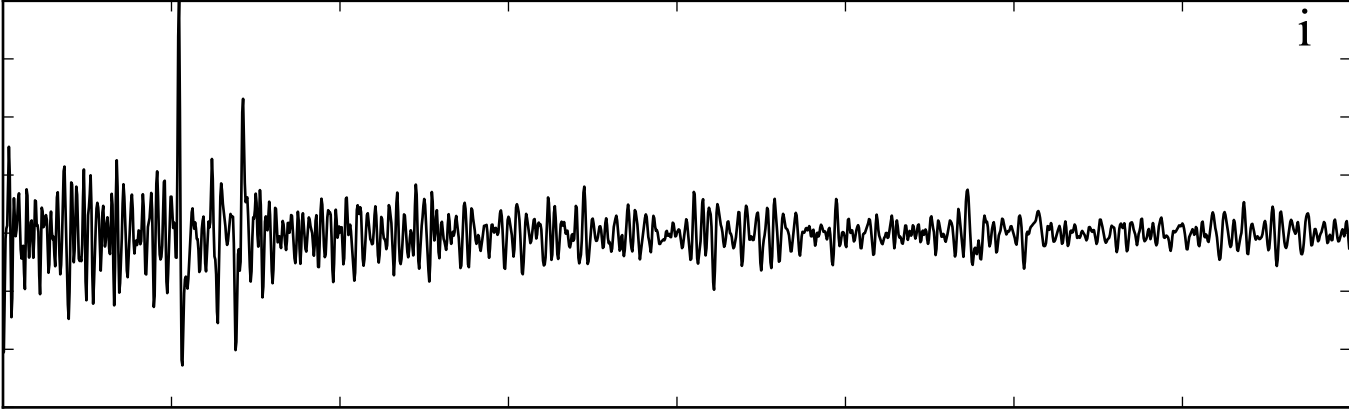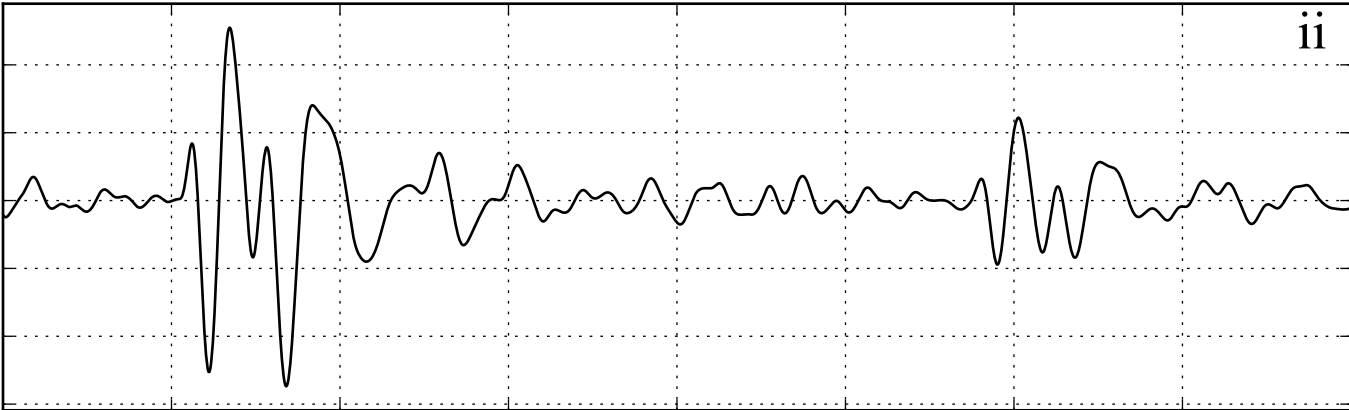

Time [s]

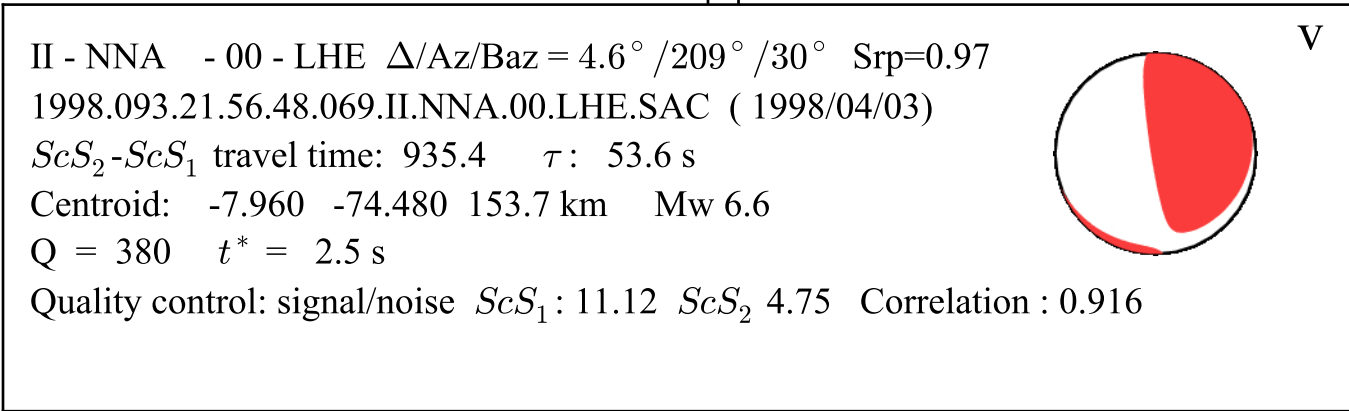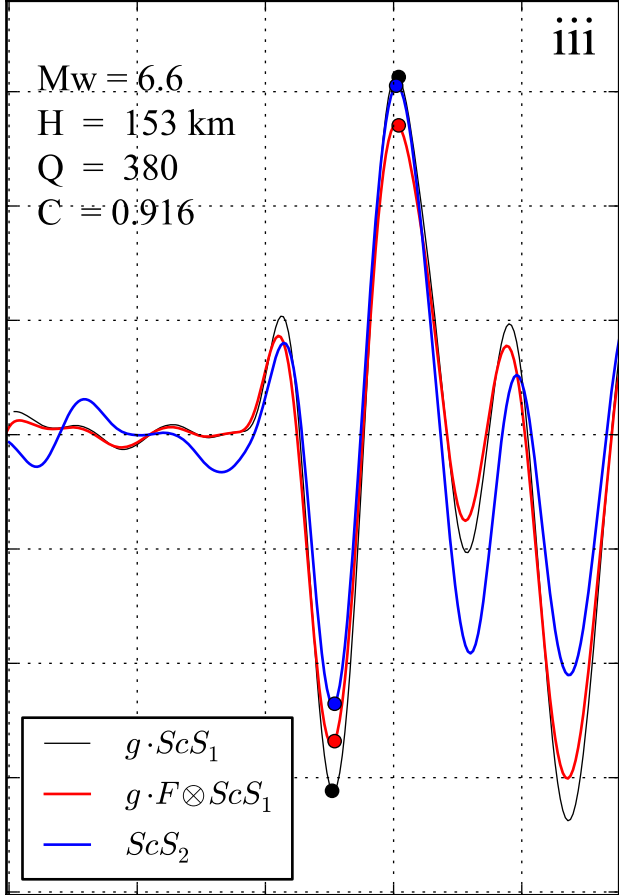

Time [s]

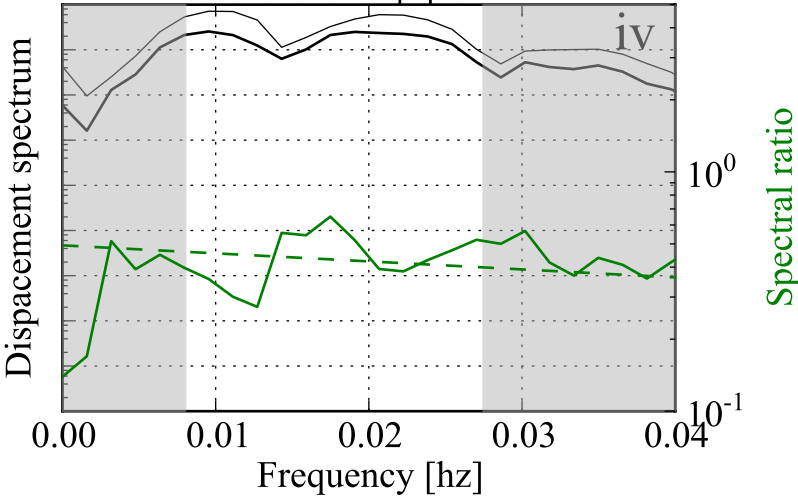

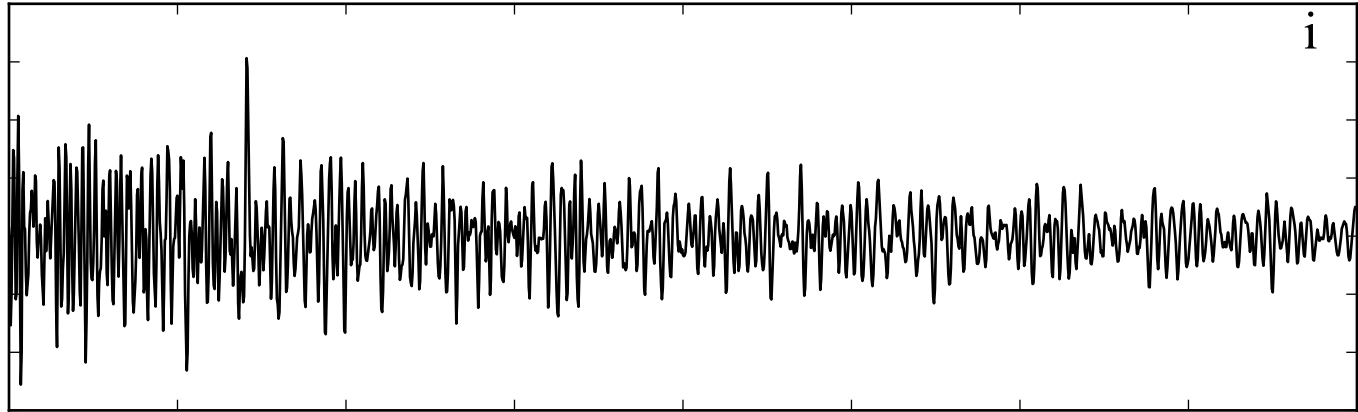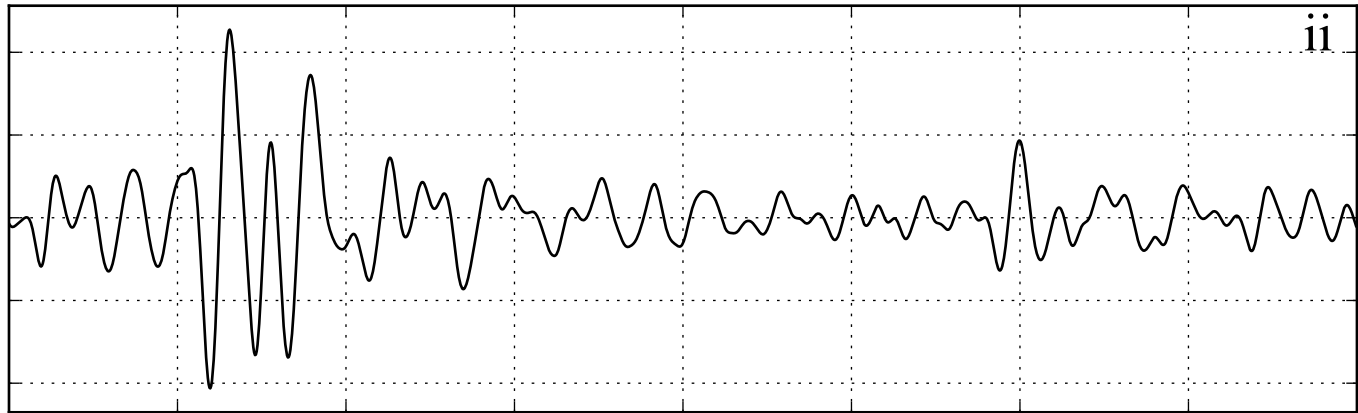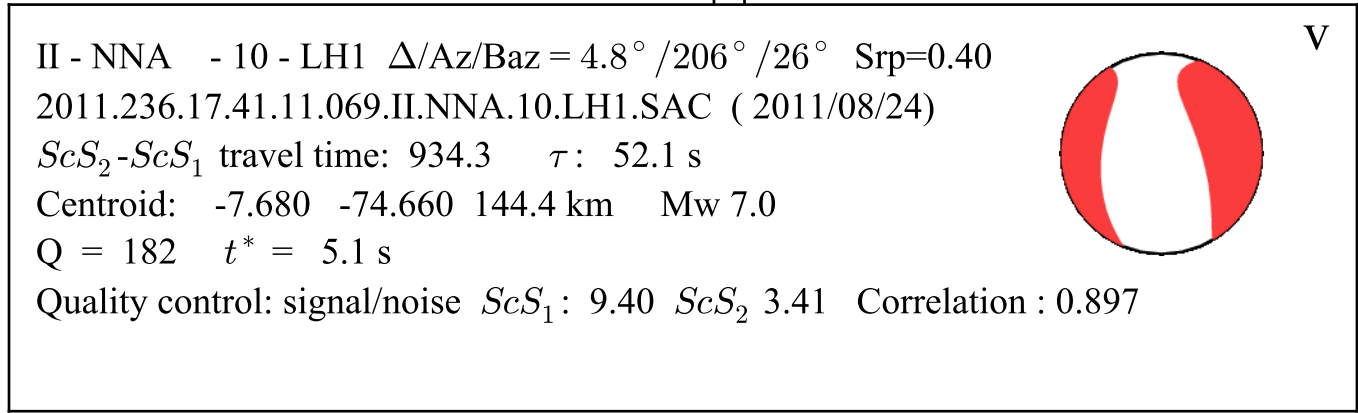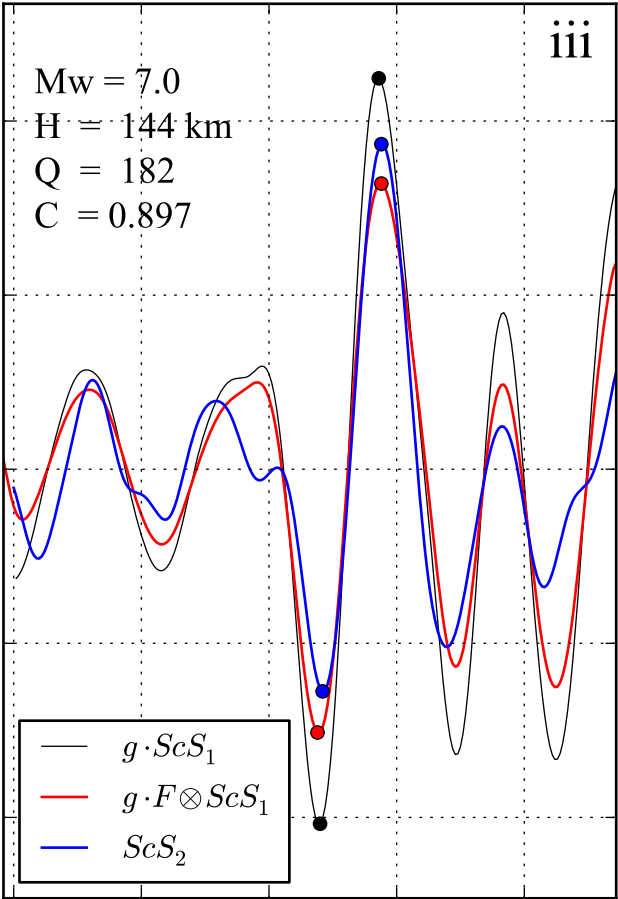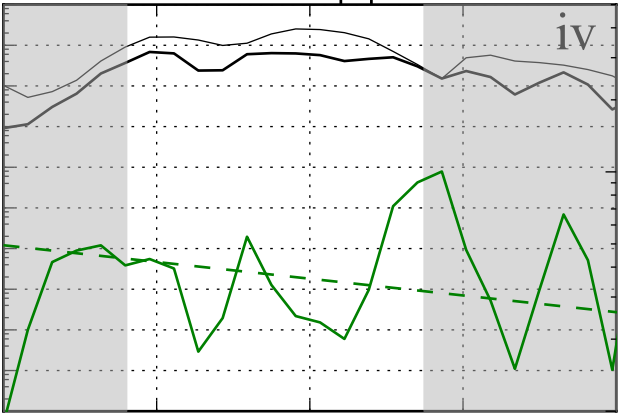

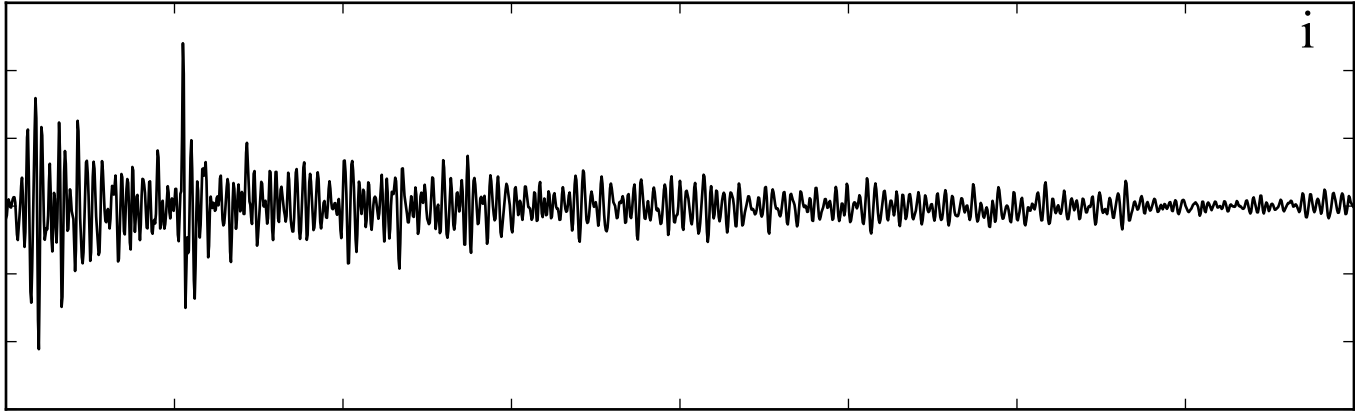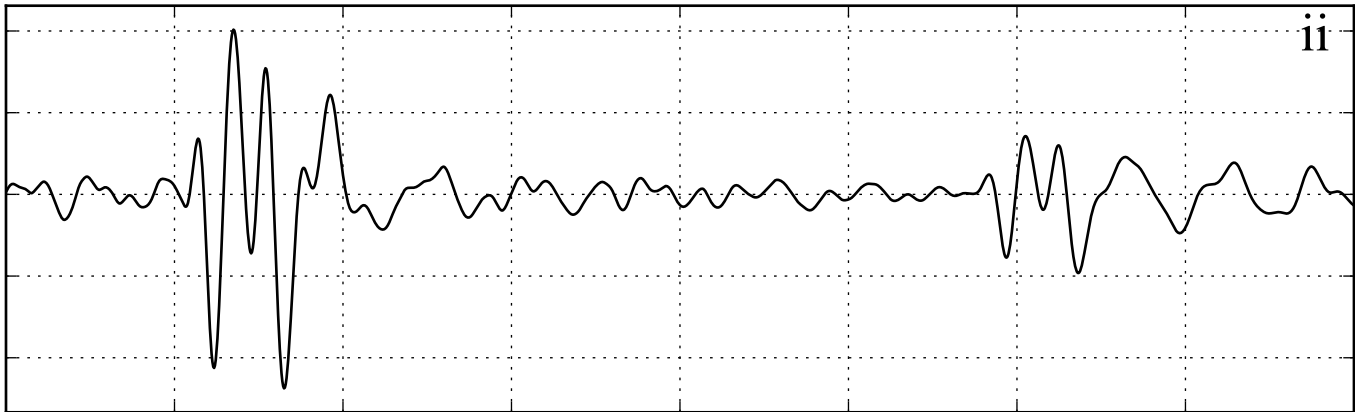

Time [s]

G - NOUC - - LHE  $\Delta/Az/Baz = 3.6^\circ / 222^\circ / 43^\circ$   $Srp=0.96$   
1995.180.12.19.03.212.G.NOUC..LHE.SAC ( 1995/06/29)  
 $ScS_2-ScS_1$  travel time: 940.1  $\tau$ : 46.2 s  
Centroid: -19.420 168.950 142.7 km Mw 6.6  
 $Q = 191$   $t^* = 4.9$  s  
Quality control: signal/noise  $ScS_1$ : 15.81  $ScS_2$  5.72 Correlation : 0.981

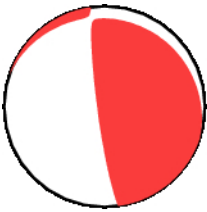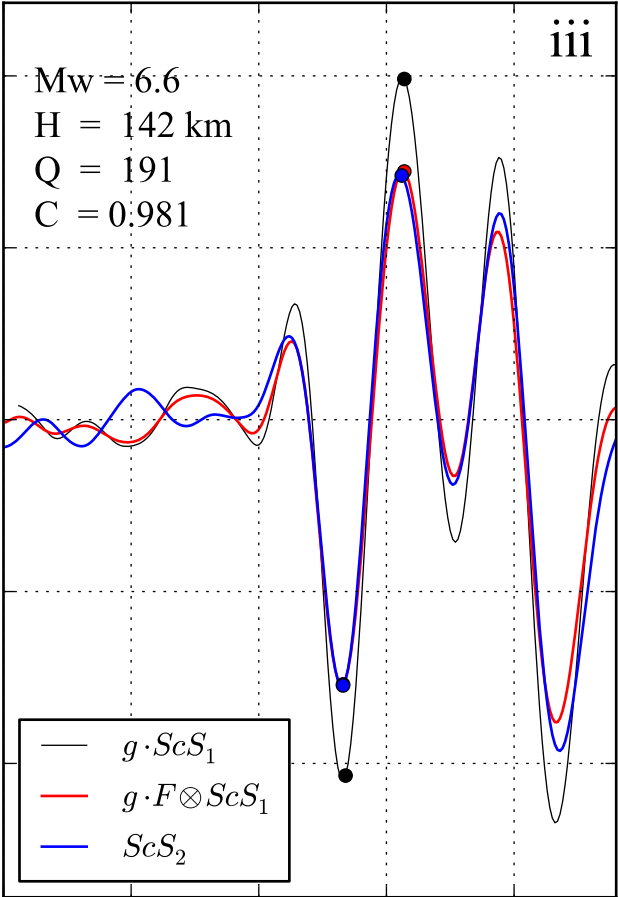

Time [s]

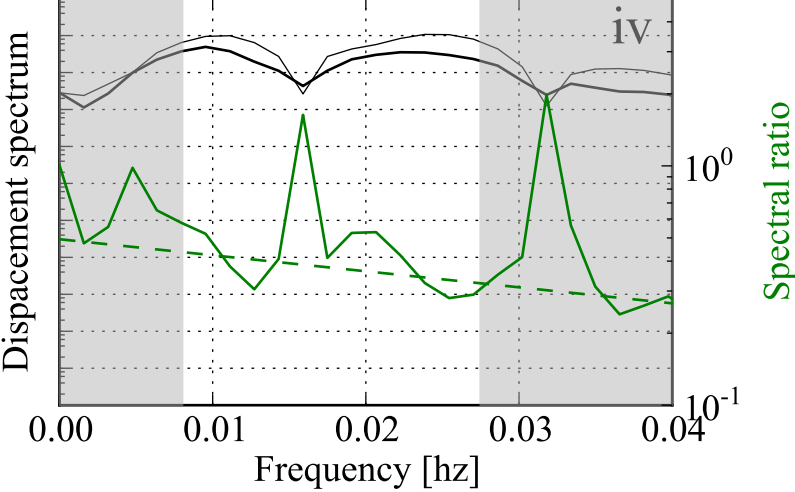

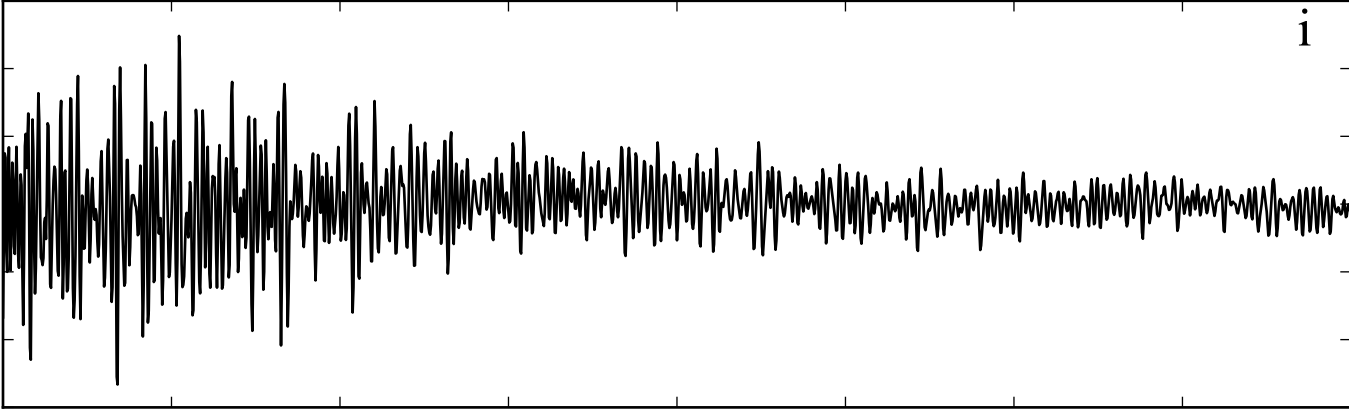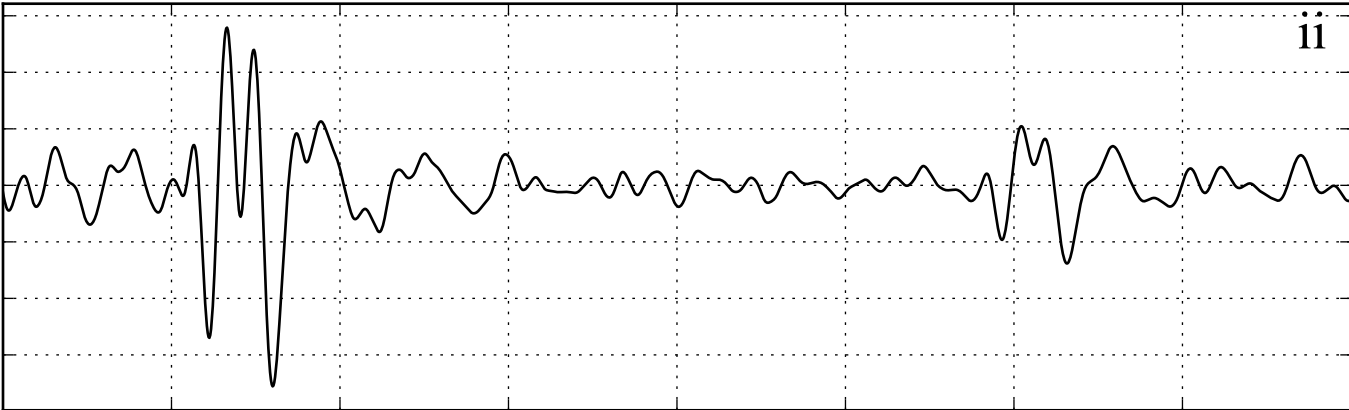

Time [s]

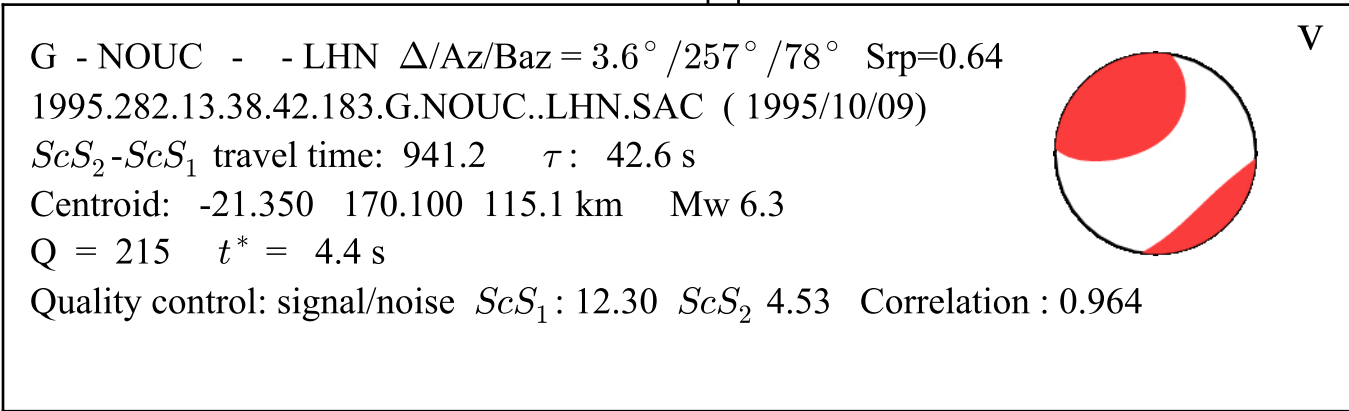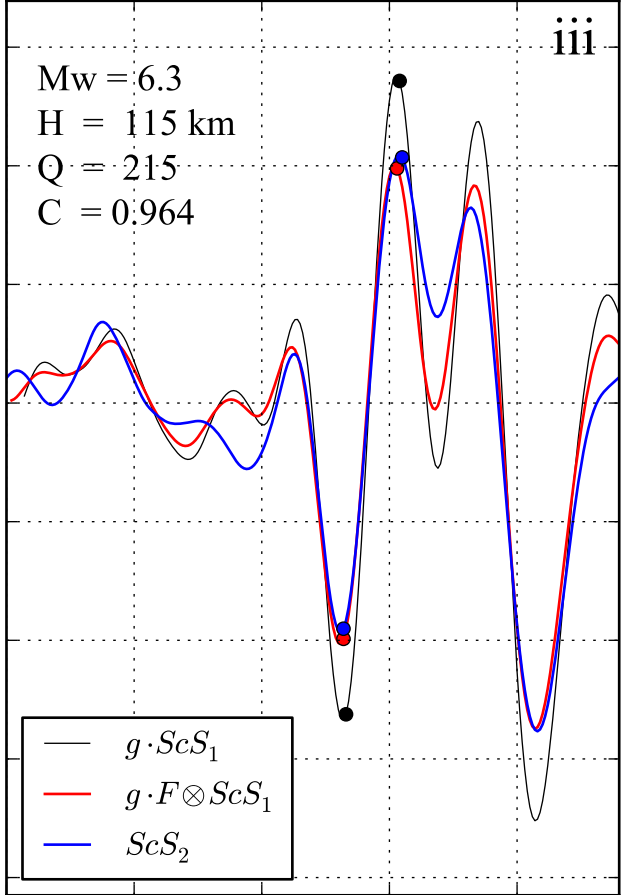

Time [s]

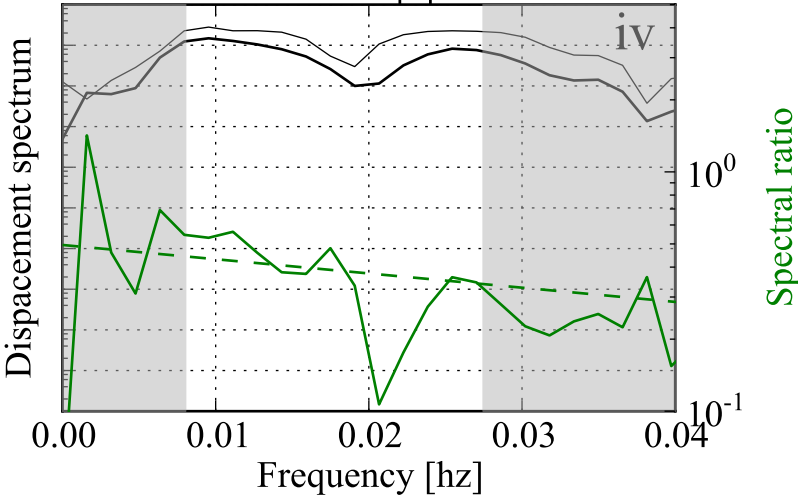

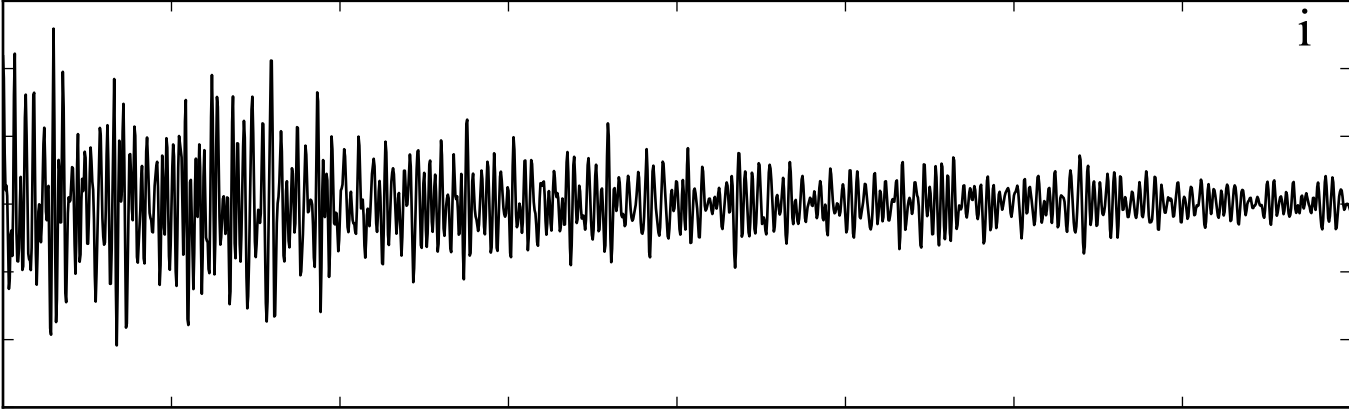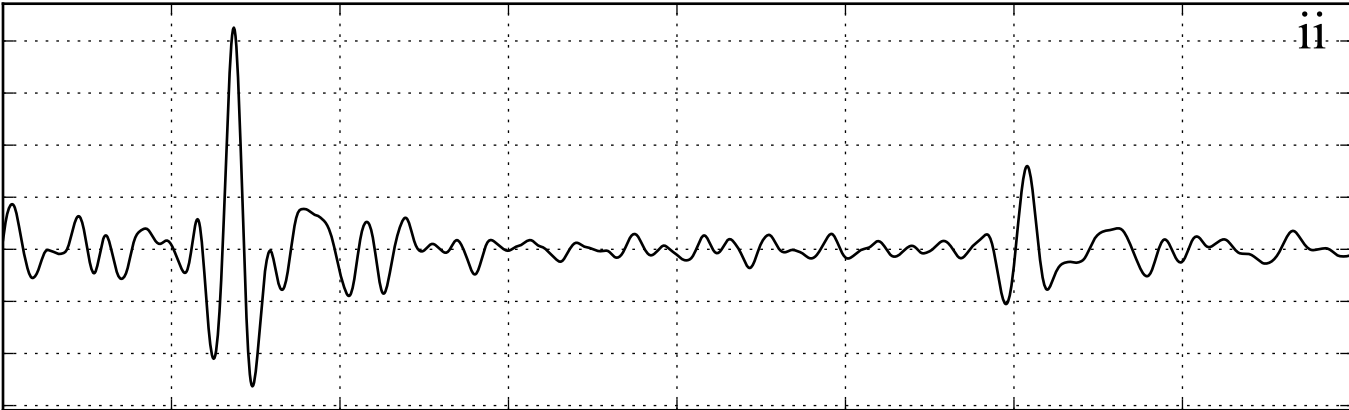

Time [s]

G - NOUC - - LHE  $\Delta/Az/Baz = 3.1^\circ/234^\circ/55^\circ$   $Srp=0.68$   
1997.141.14.05.26.584.G.NOUC..LHE.SAC ( 1997/05/21)  
 $ScS_2-ScS_1$  travel time: 941.3  $\tau$ : 47.9 s  
Centroid: -20.340 169.030 64.0 km Mw 6.7  
 $Q = 327$   $t^* = 2.9$  s  
Quality control: signal/noise  $ScS_1$ : 15.54  $ScS_2$  6.40 Correlation : 0.945

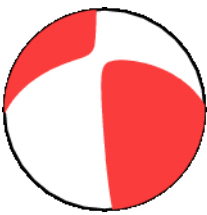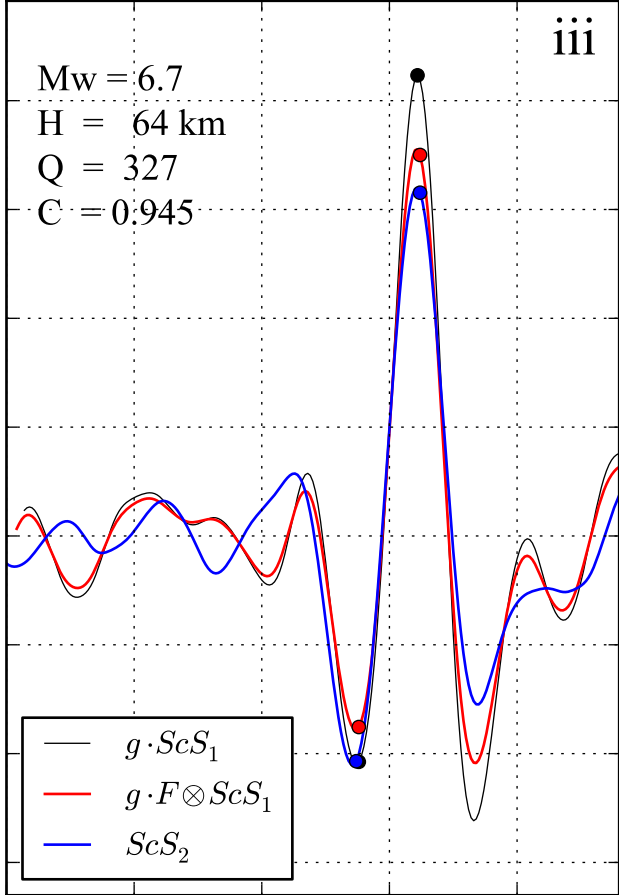

Time [s]

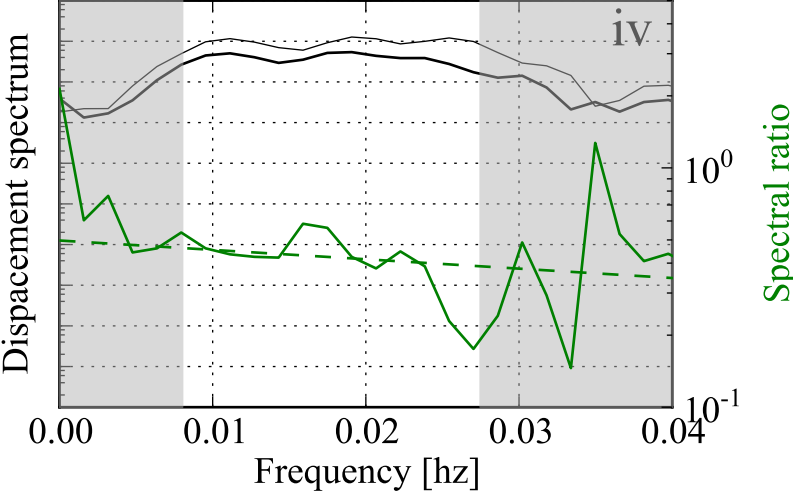



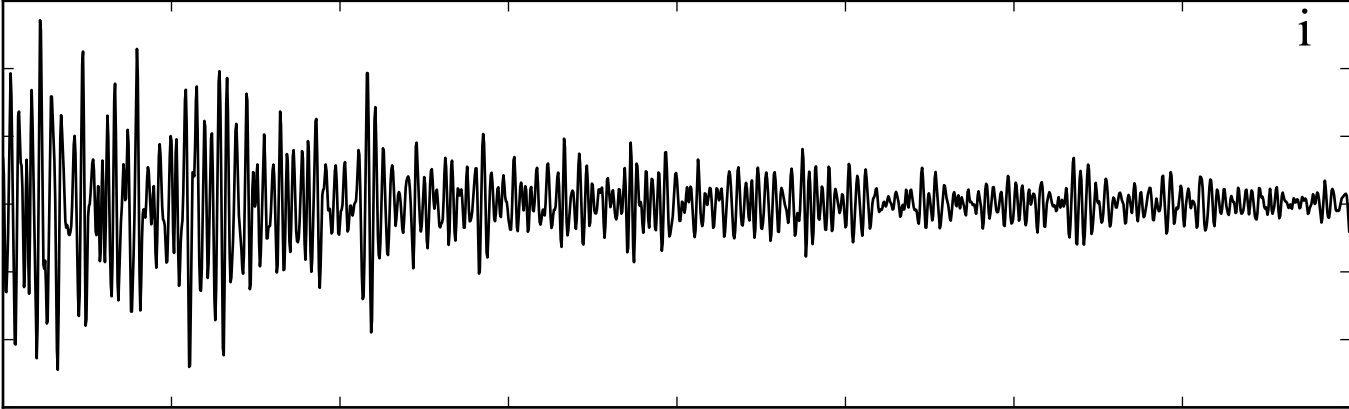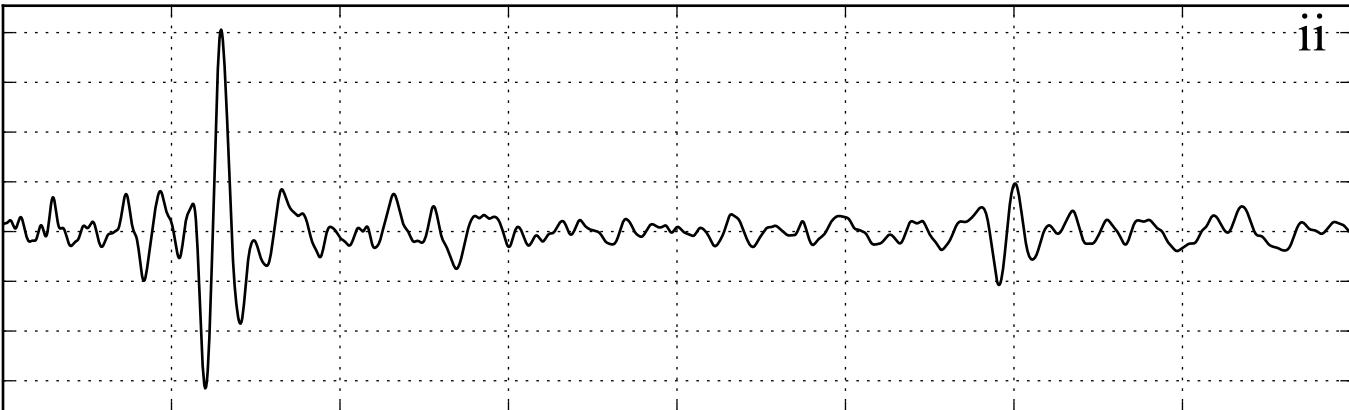

Time [s]

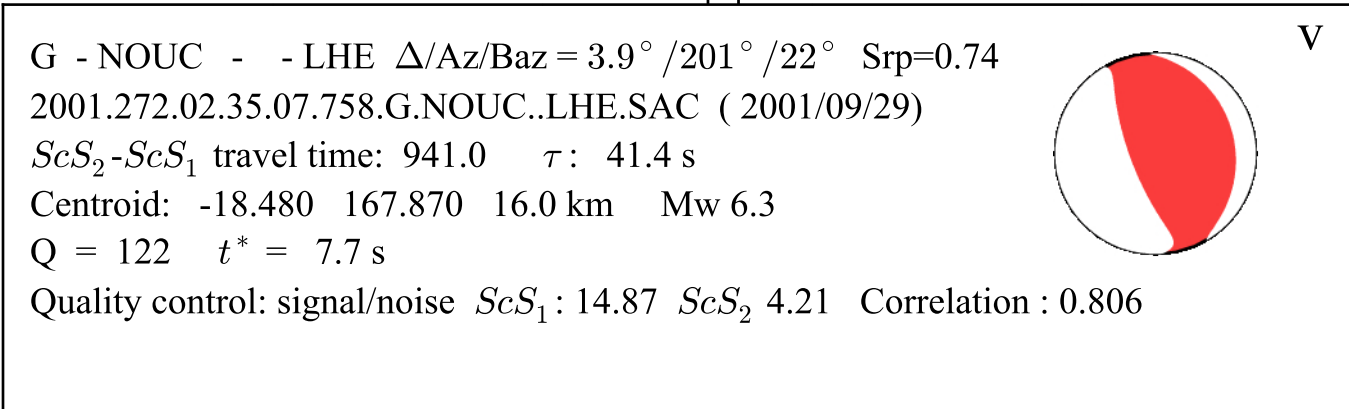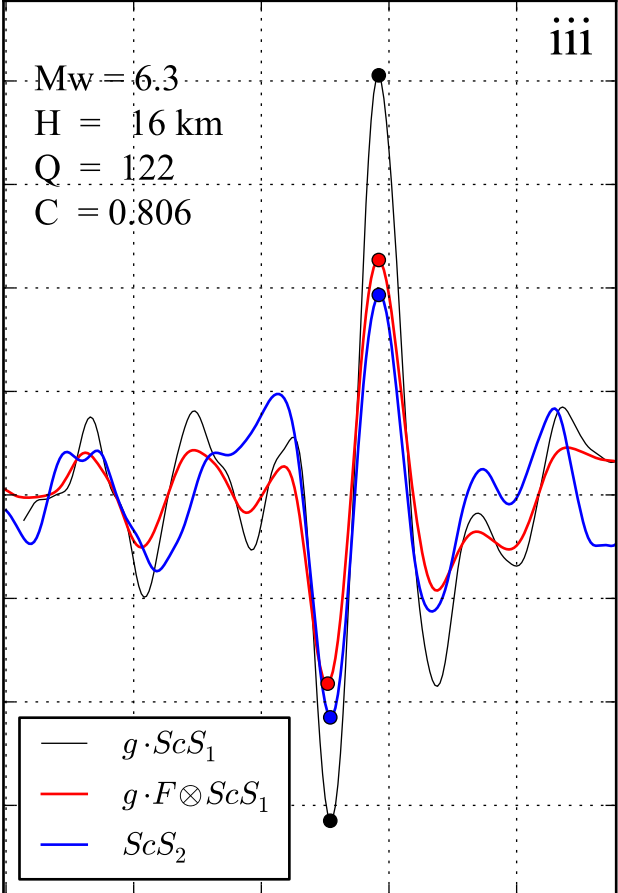

Time [s]

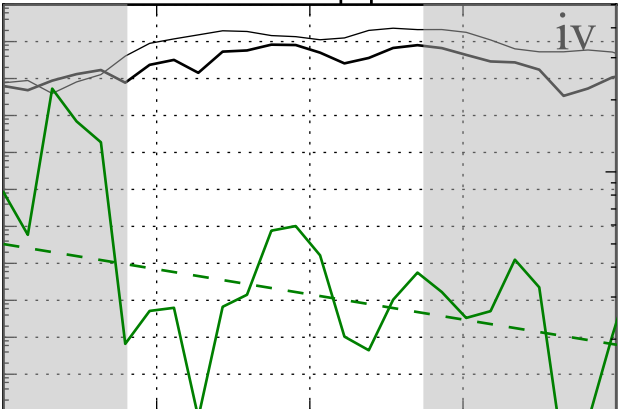

Frequency [hz]

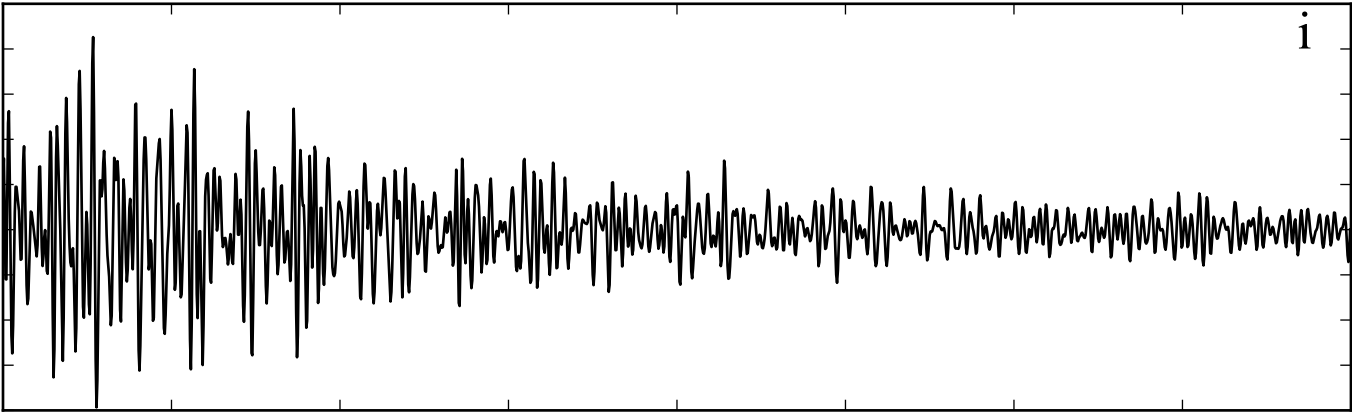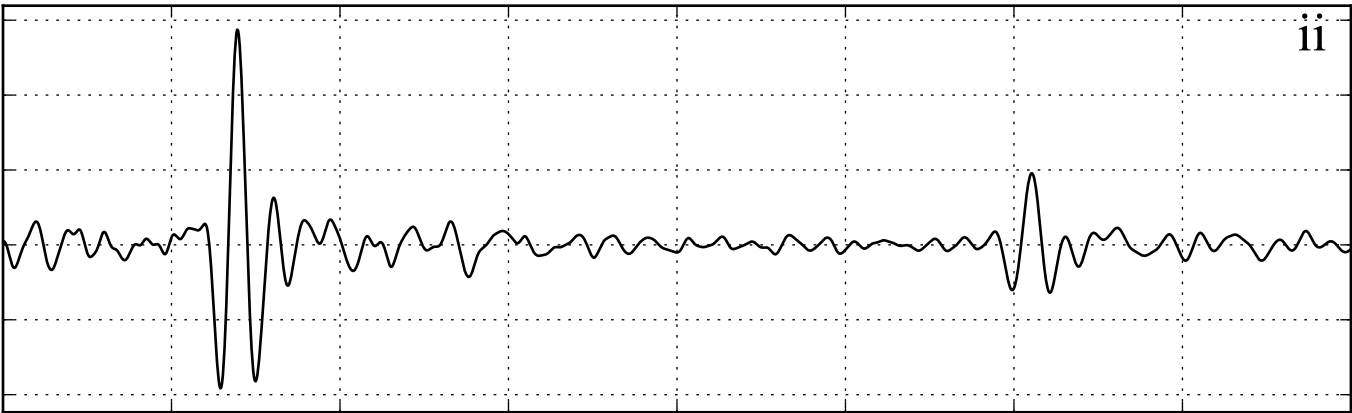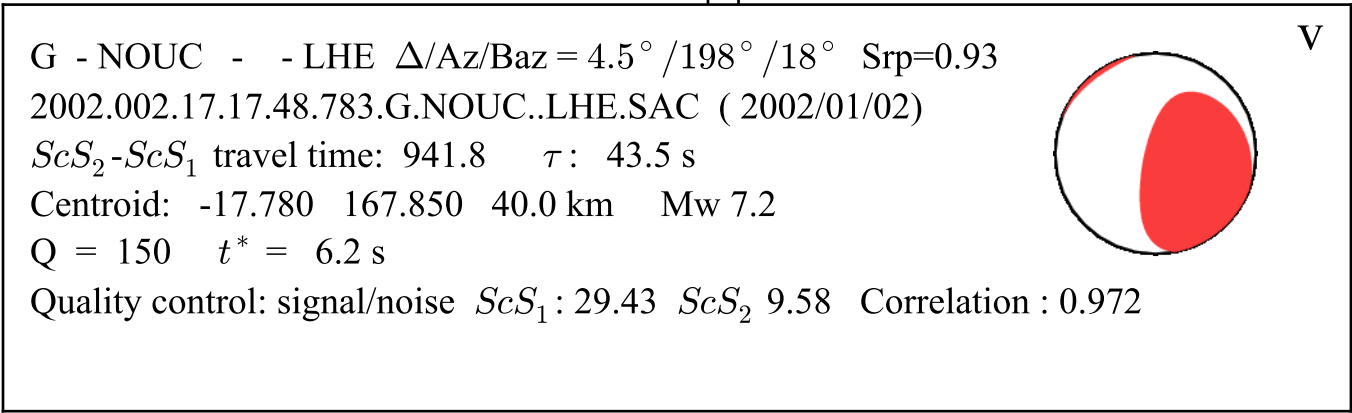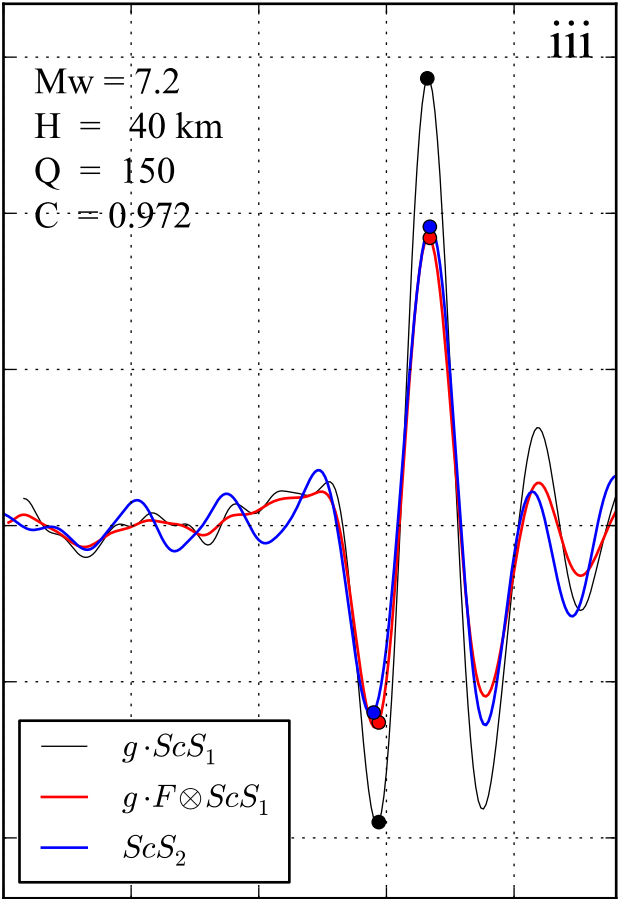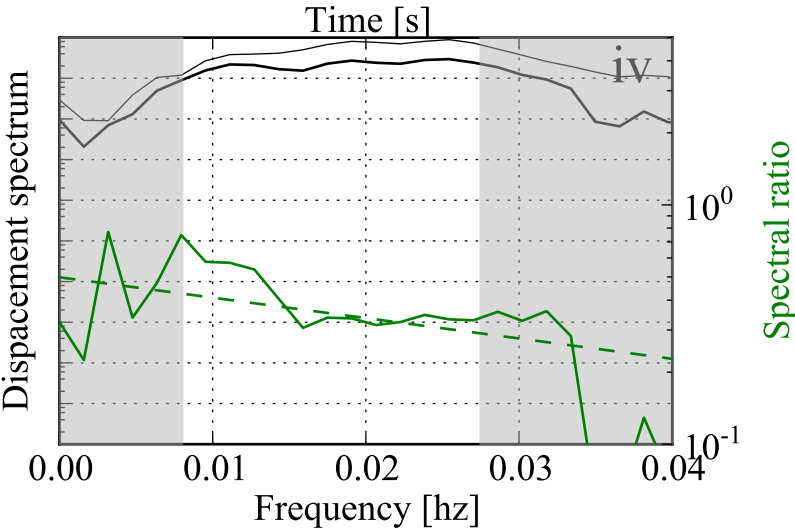

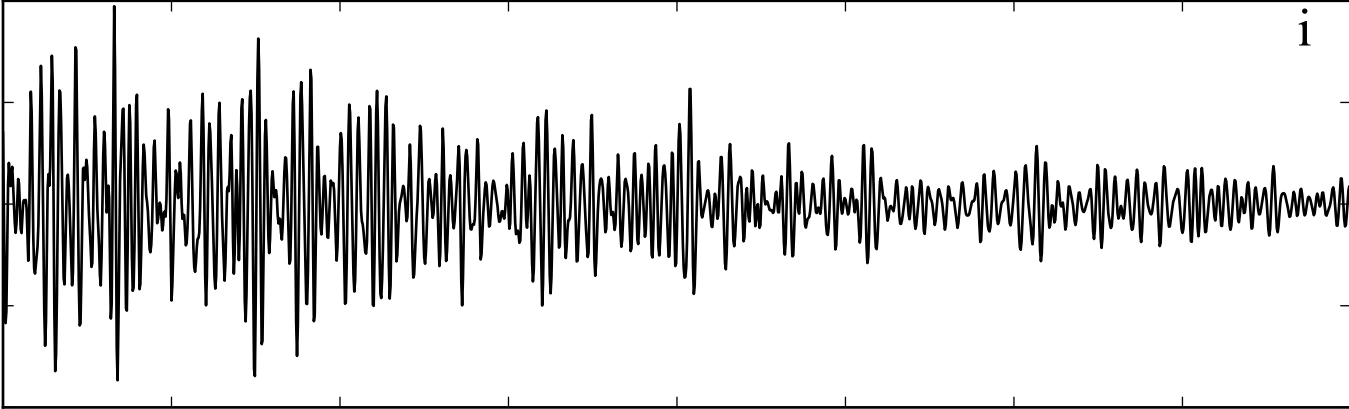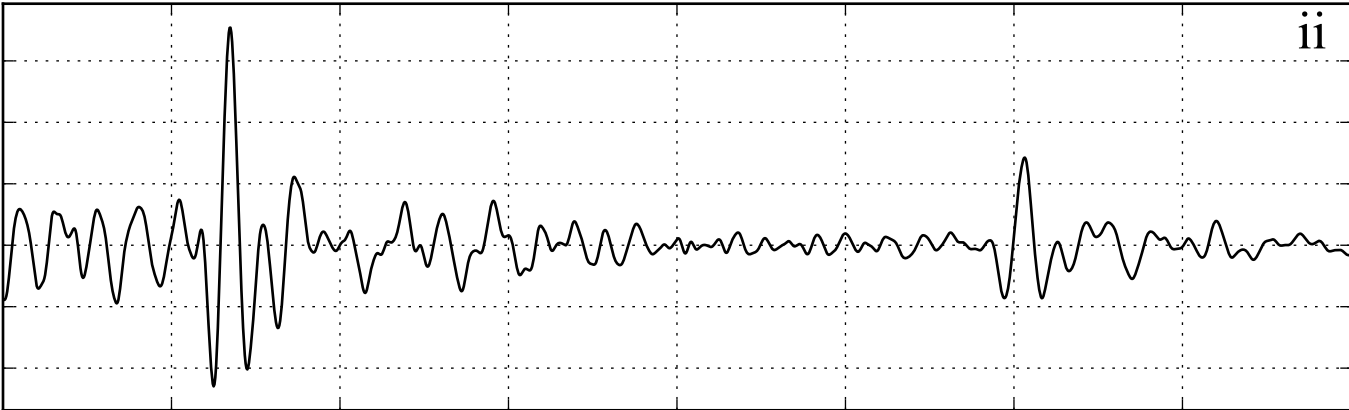

Time [s]

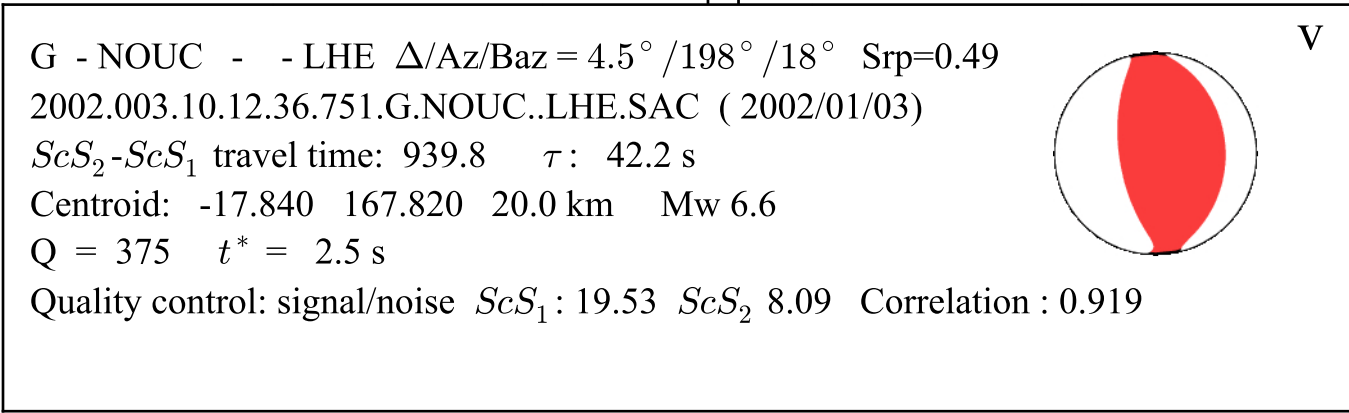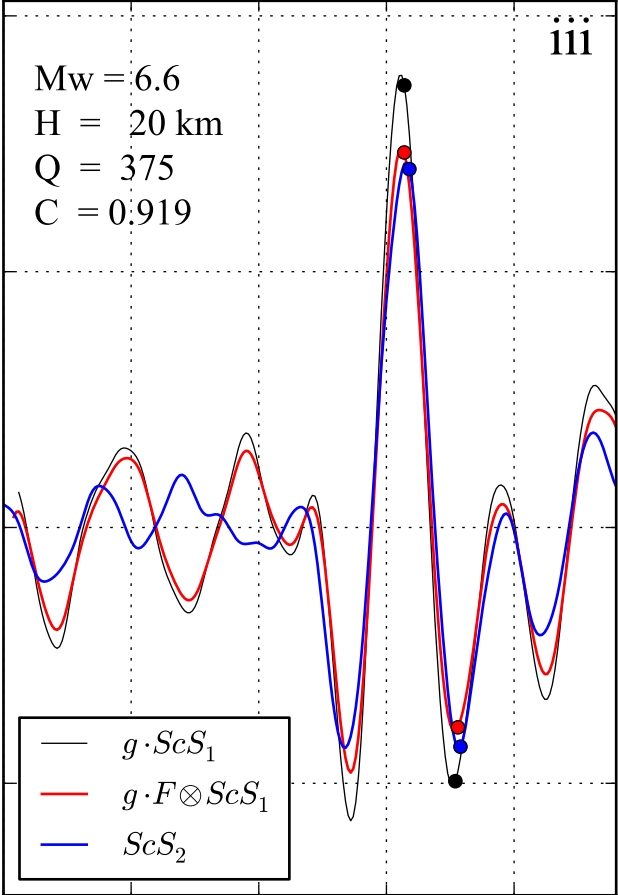

Time [s]

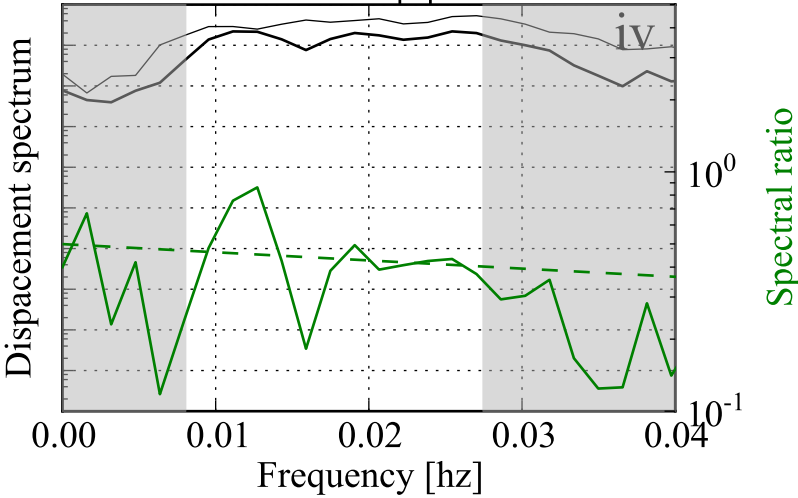

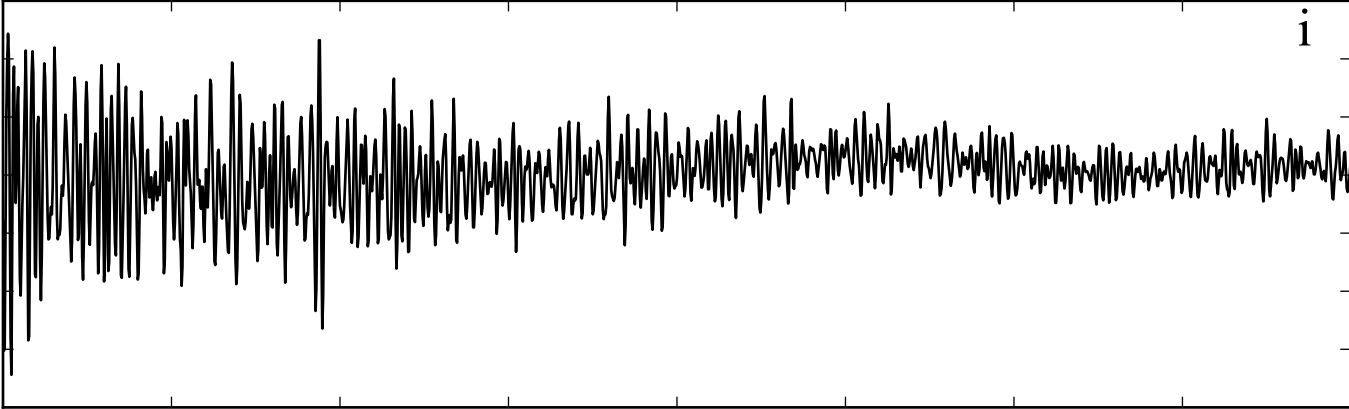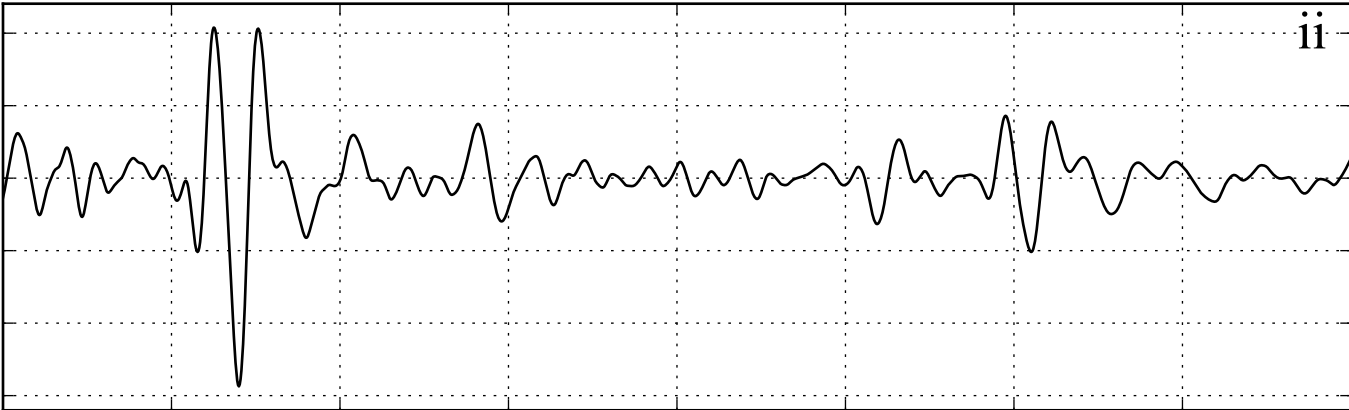

Time [s]

G - NOUC - - LHE  $\Delta/Az/Baz = 3.4^\circ / 249^\circ / 70^\circ$   $Srp=0.51$   
2003.117.15.58.40.065.G.NOUC..LHE.SAC ( 2003/04/27)  
 $ScS_2-ScS_1$  travel time: 939.2  $\tau$ : 50.5 s  
Centroid: -20.940 169.710 83.8 km Mw 6.3  
 $Q = 203$   $t^* = 4.6$  s  
Quality control: signal/noise  $ScS_1$ : 8.44  $ScS_2$  3.20 Correlation : 0.880

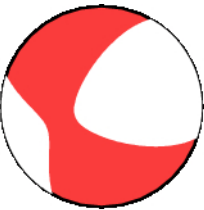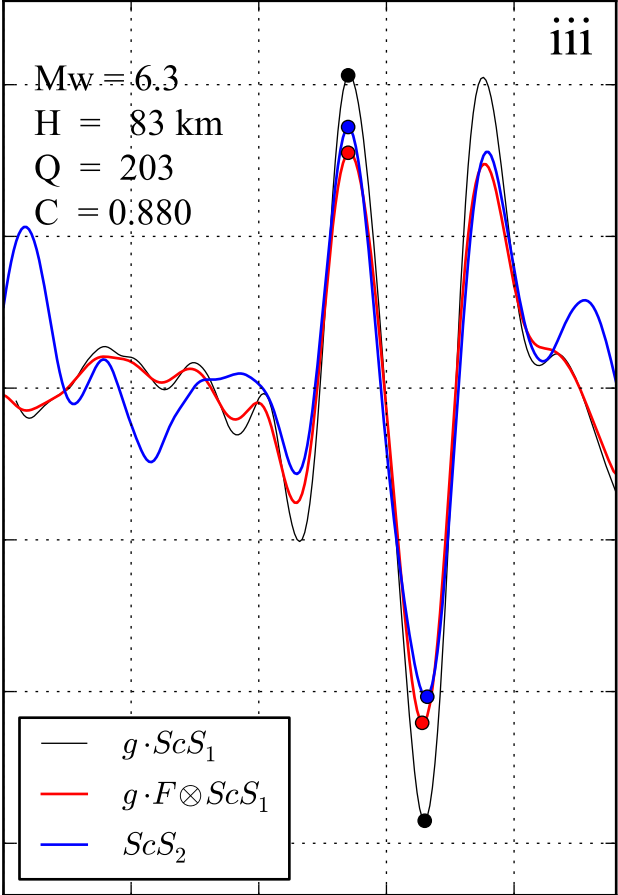

Time [s]

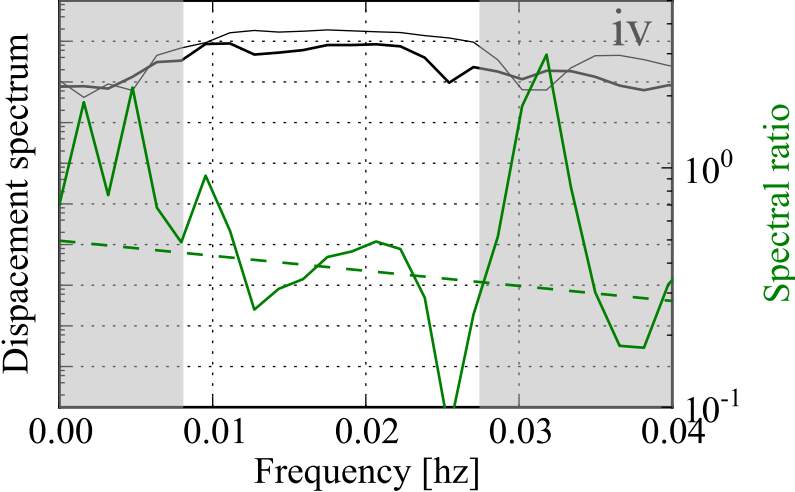

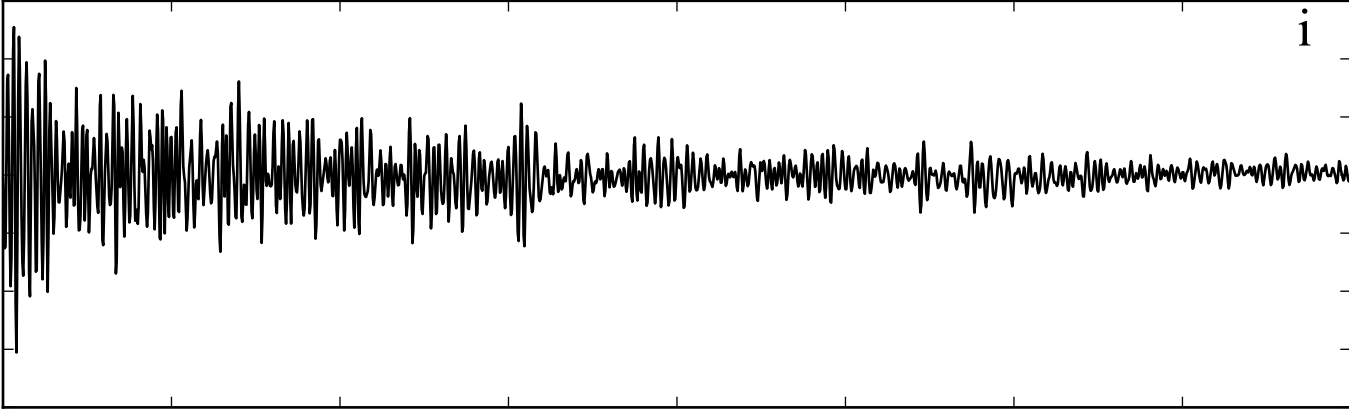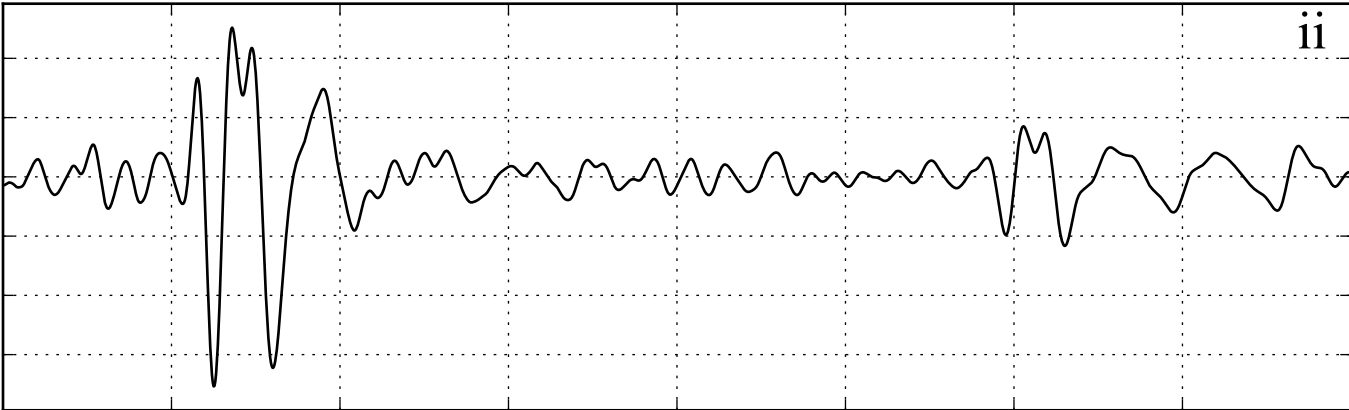

Time [s]

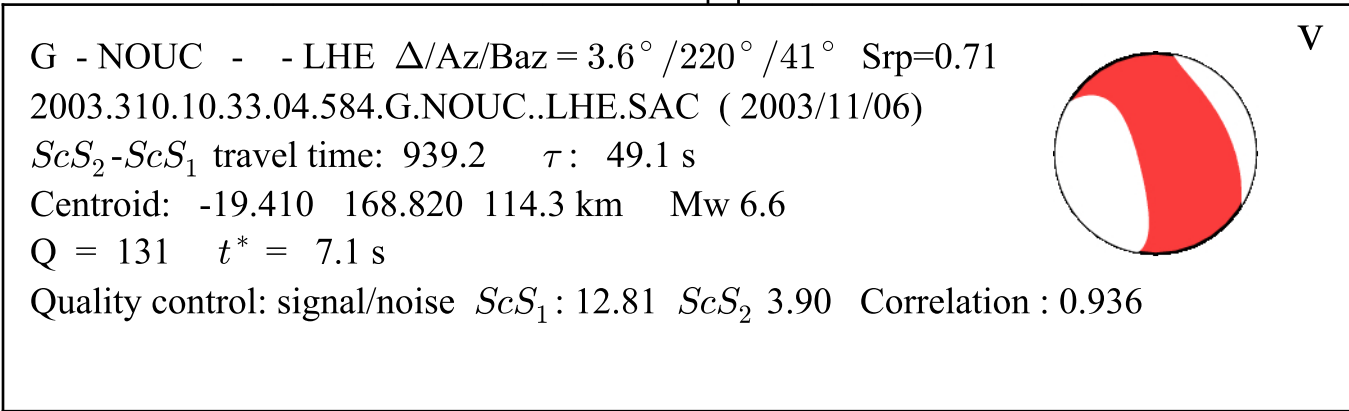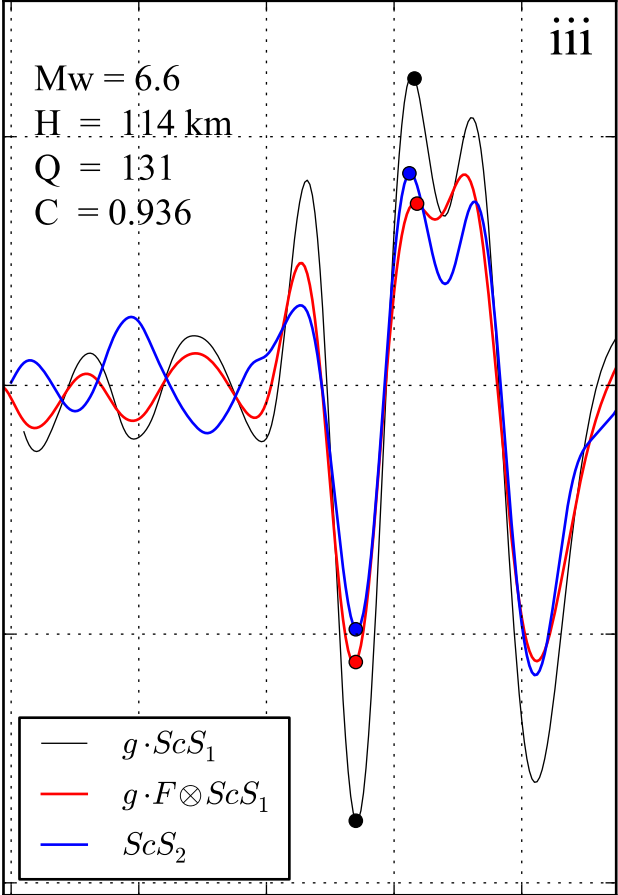

Time [s]

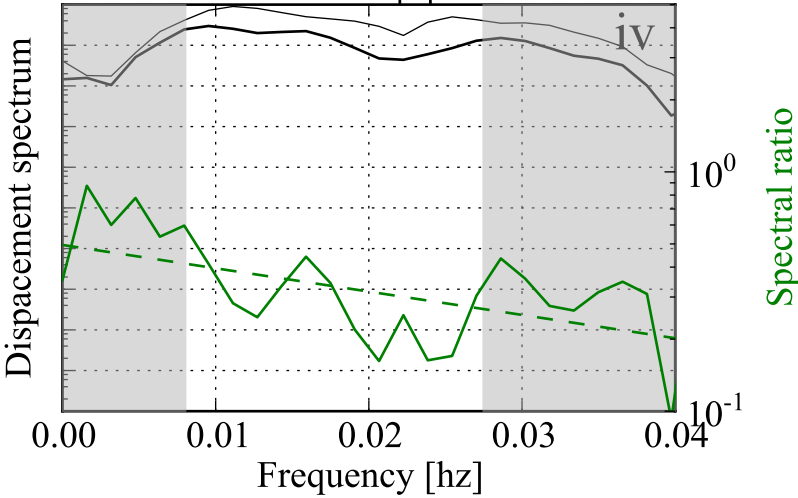

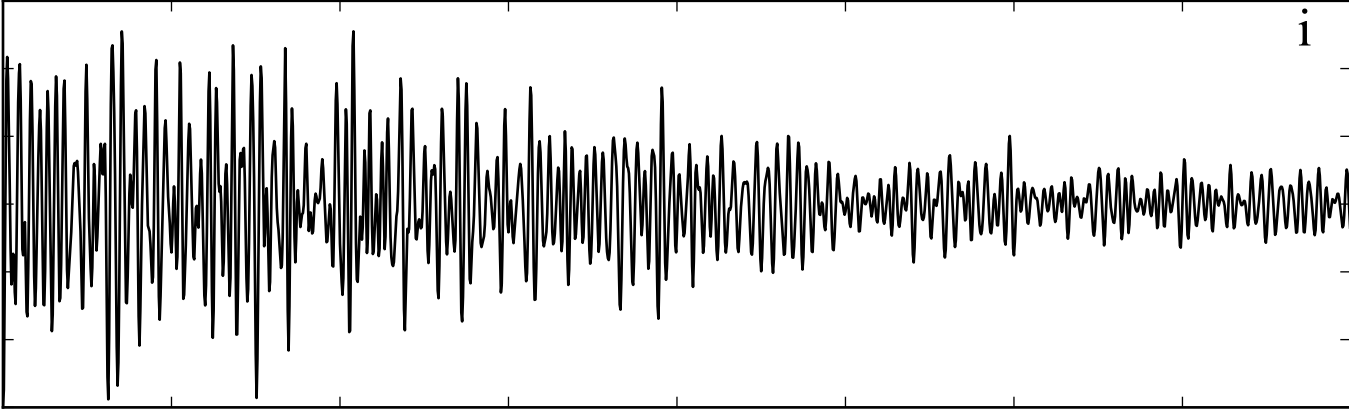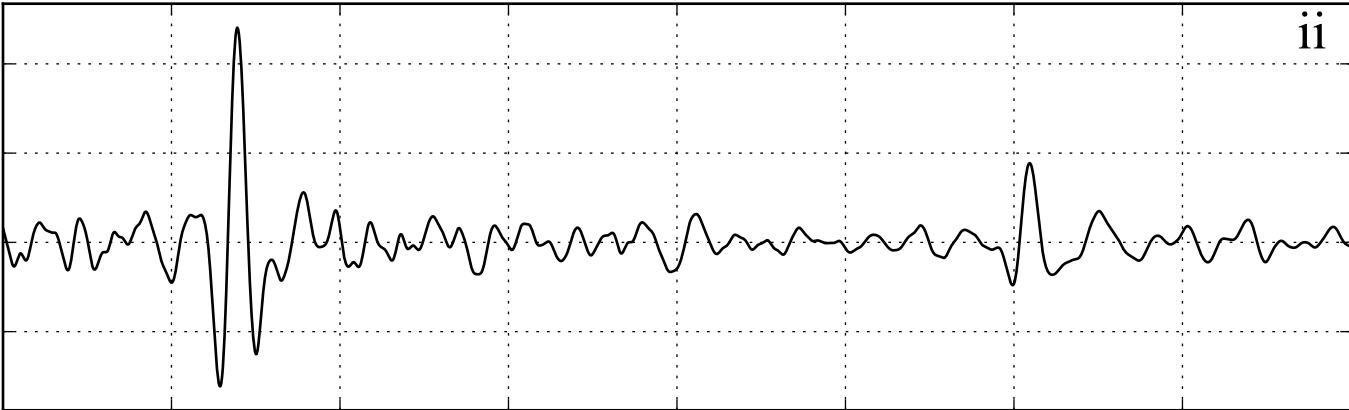

Time [s]

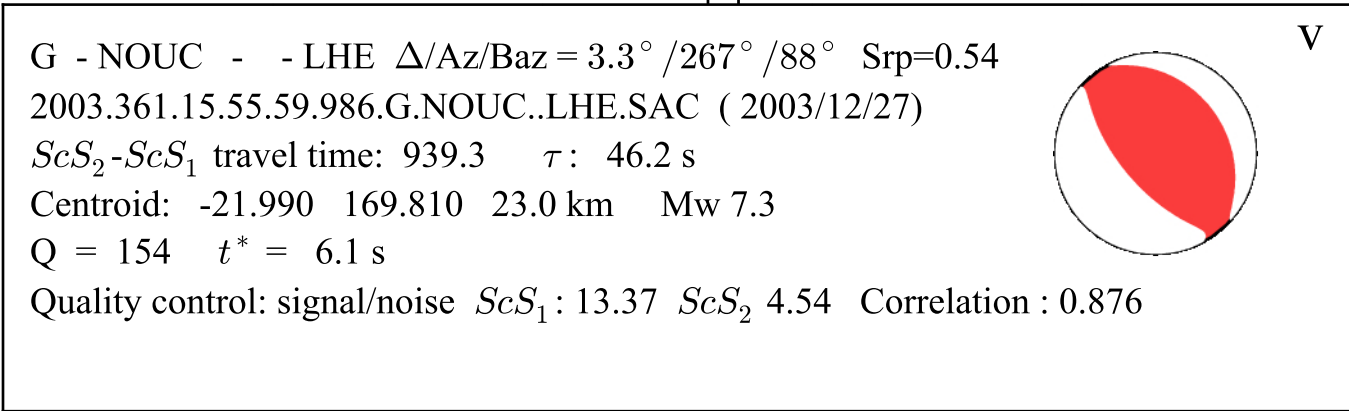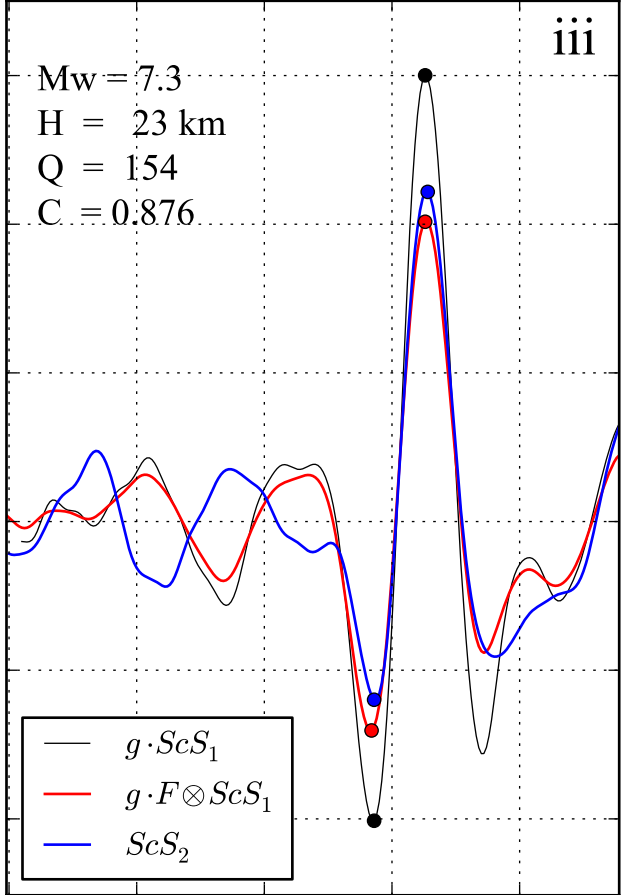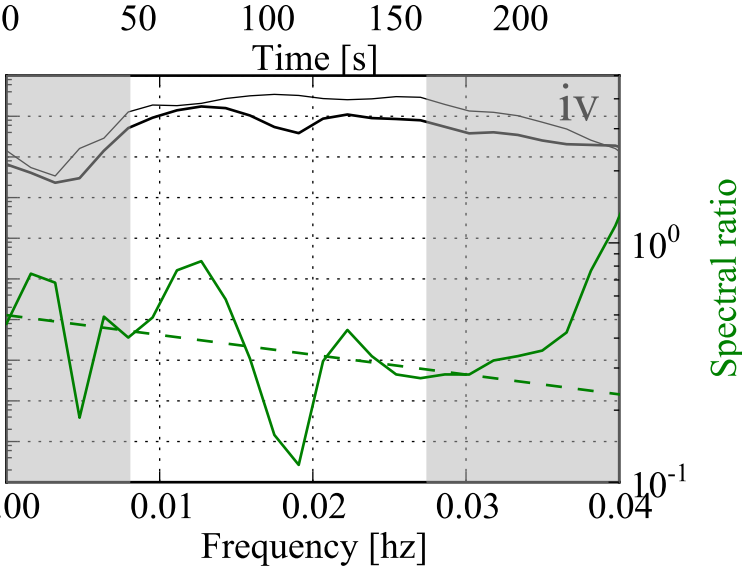

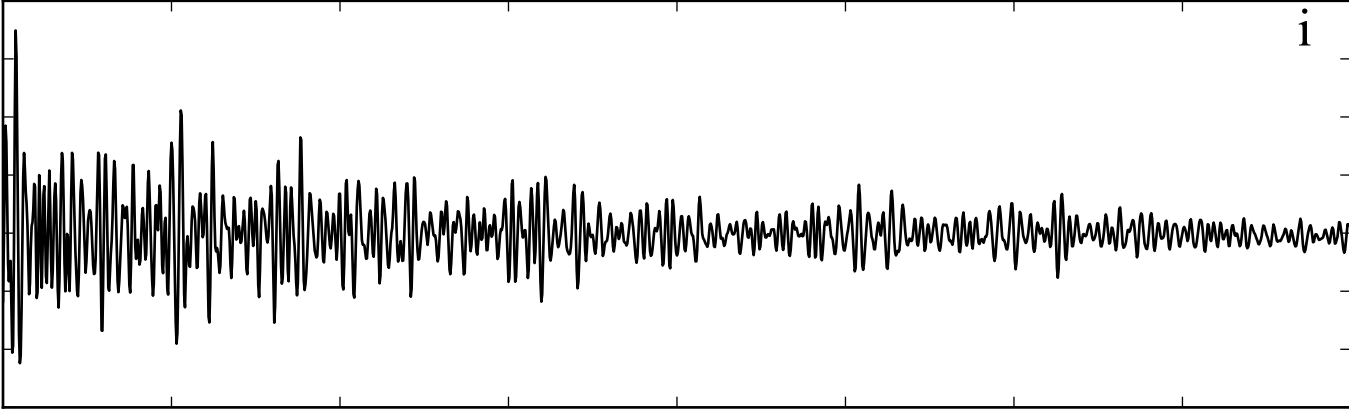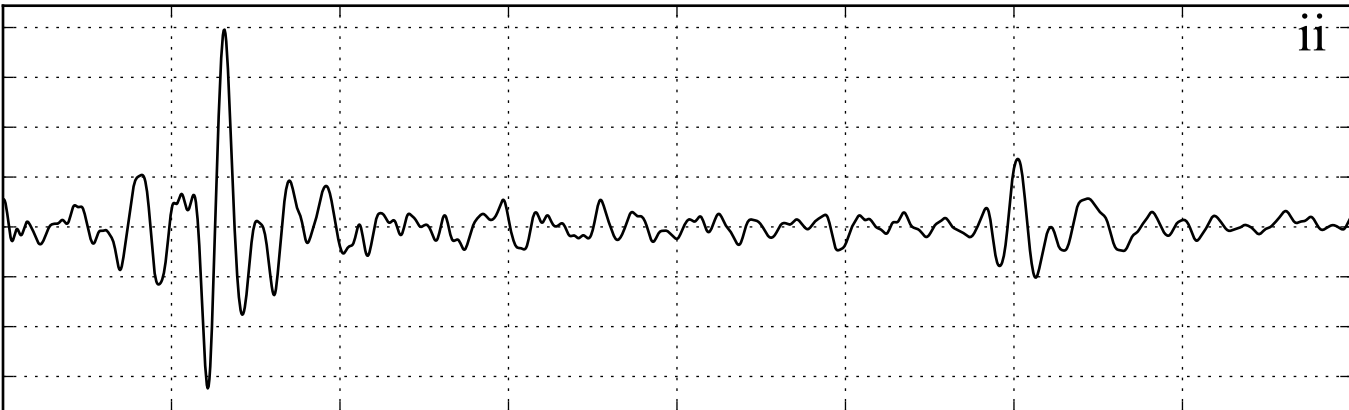

Time [s]

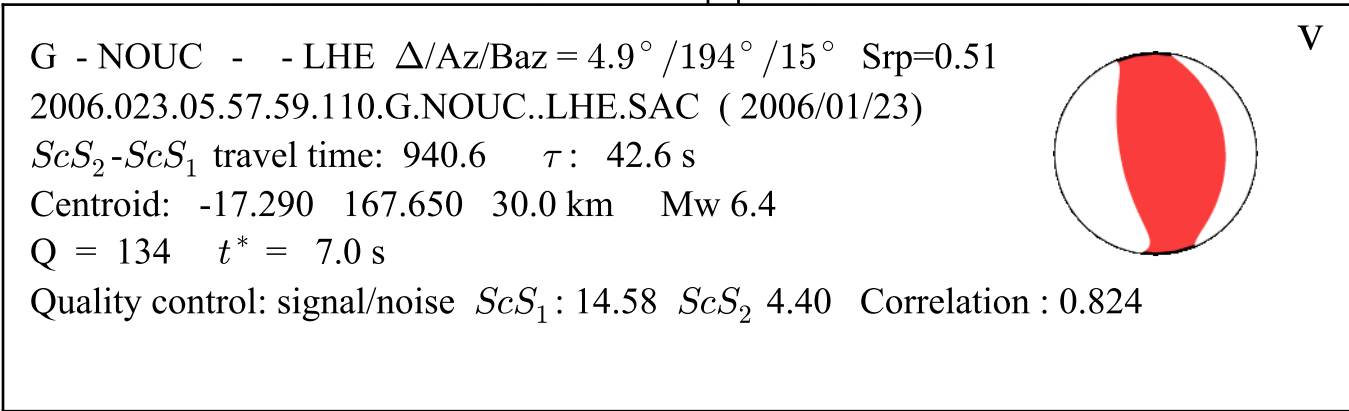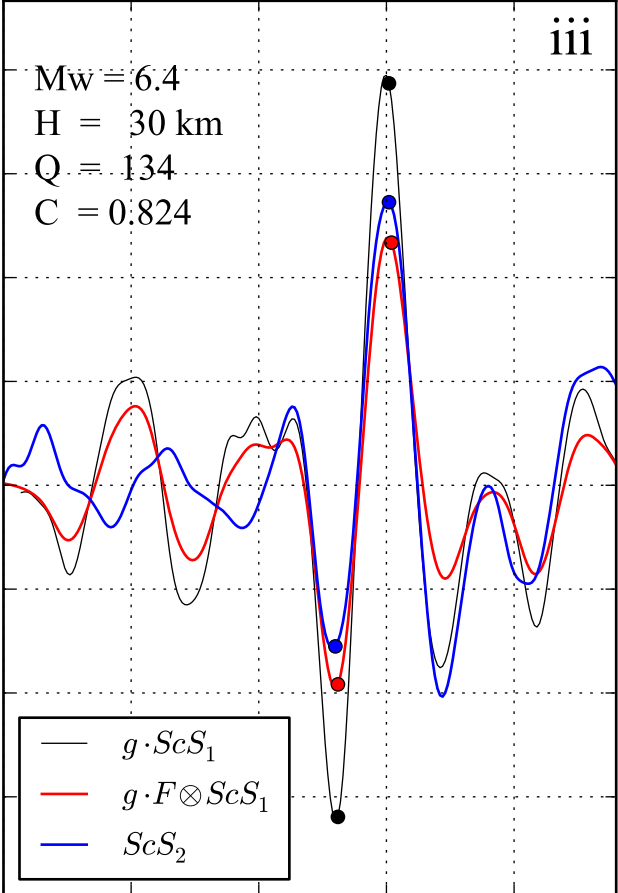

Time [s]

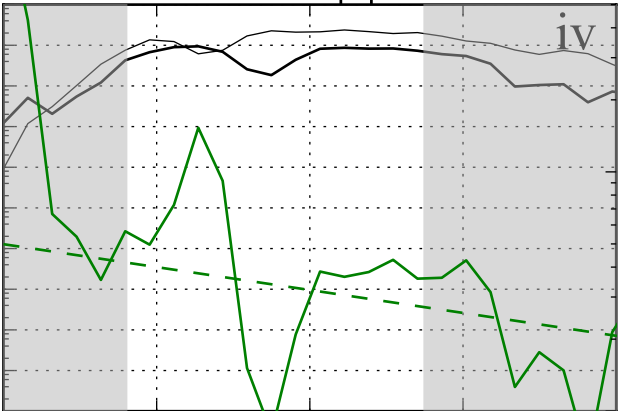

Frequency [hz]

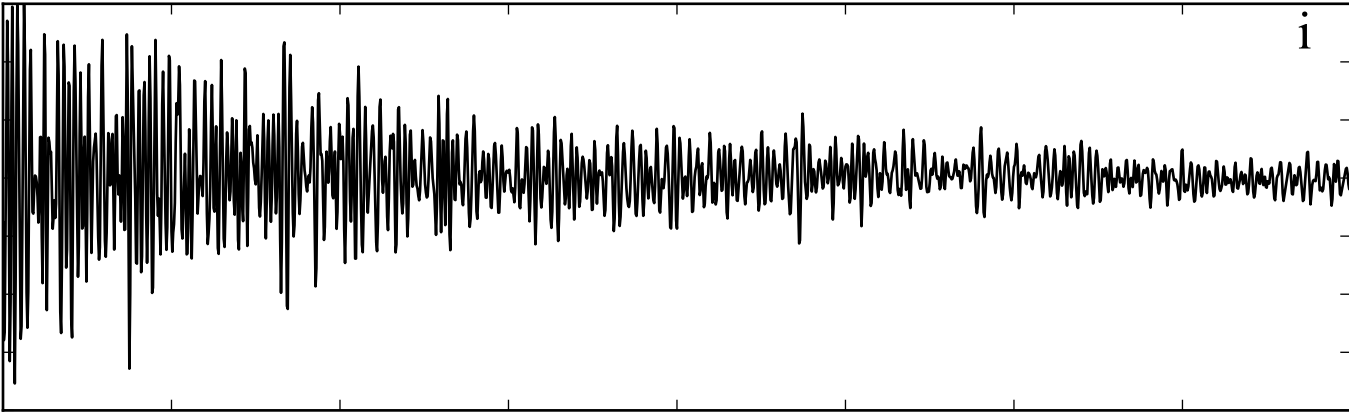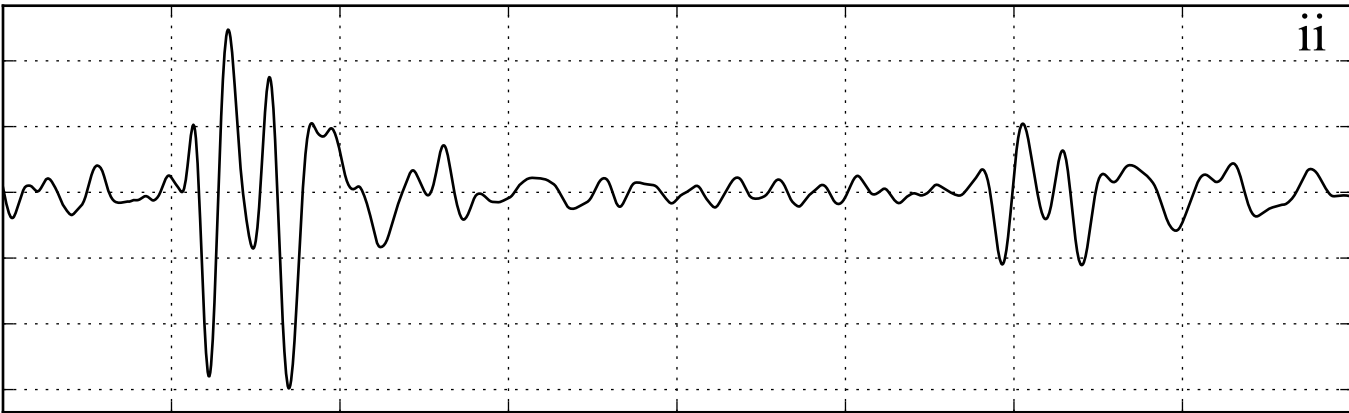

Time [s]

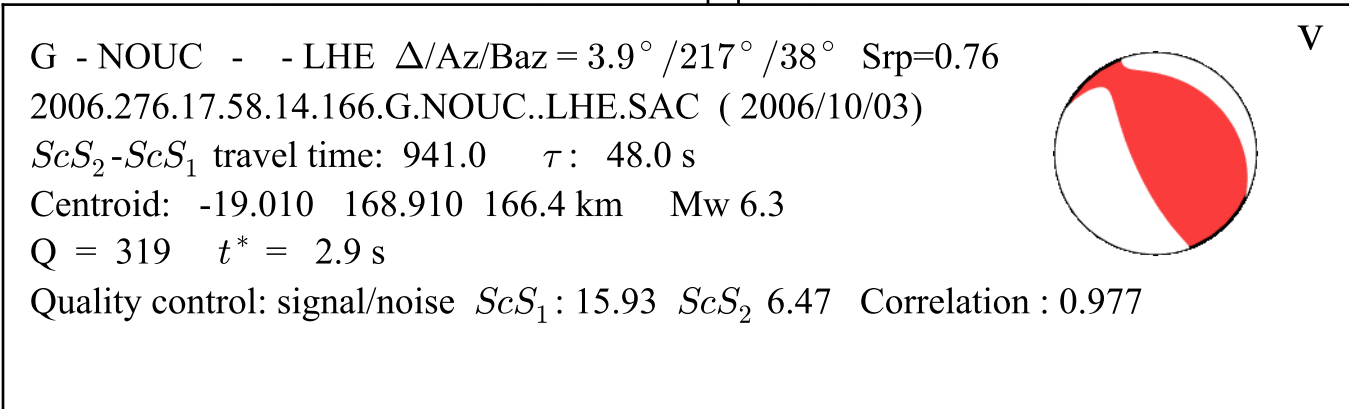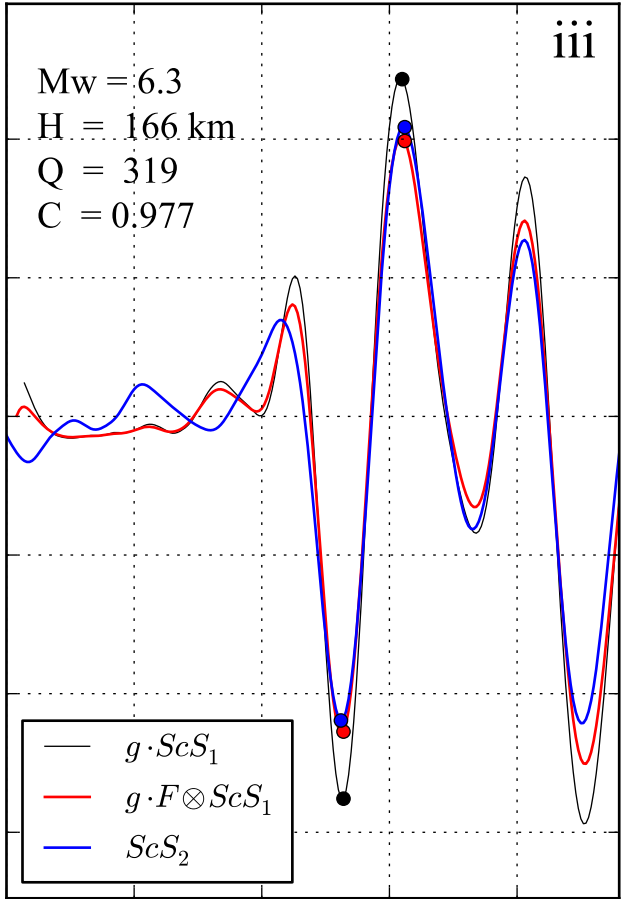

Time [s]

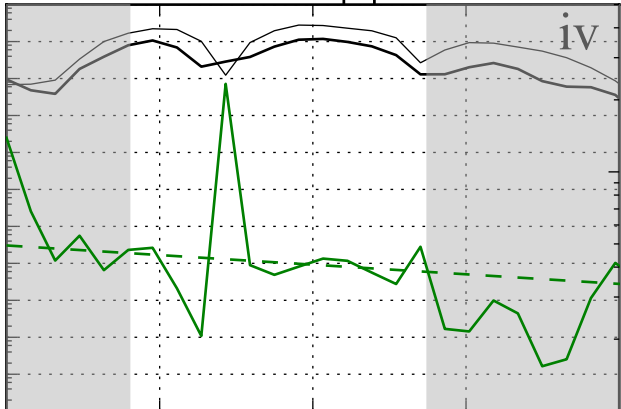

Frequency [hz]

Spectral ratio



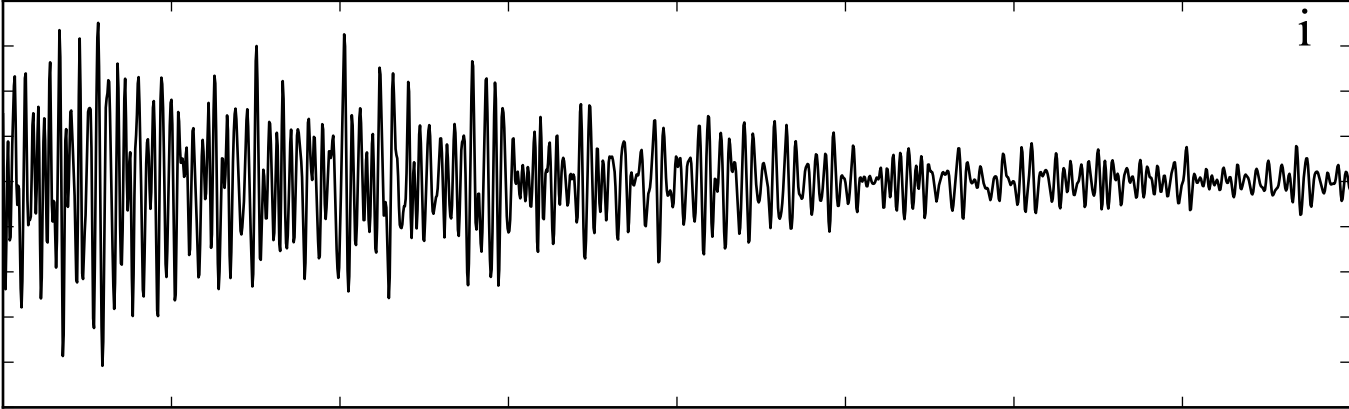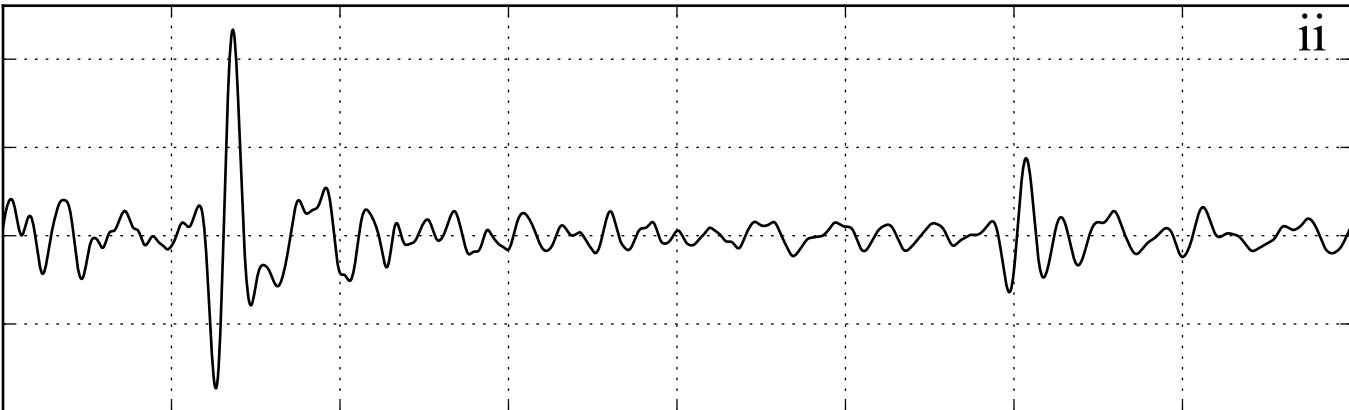

Time [s]

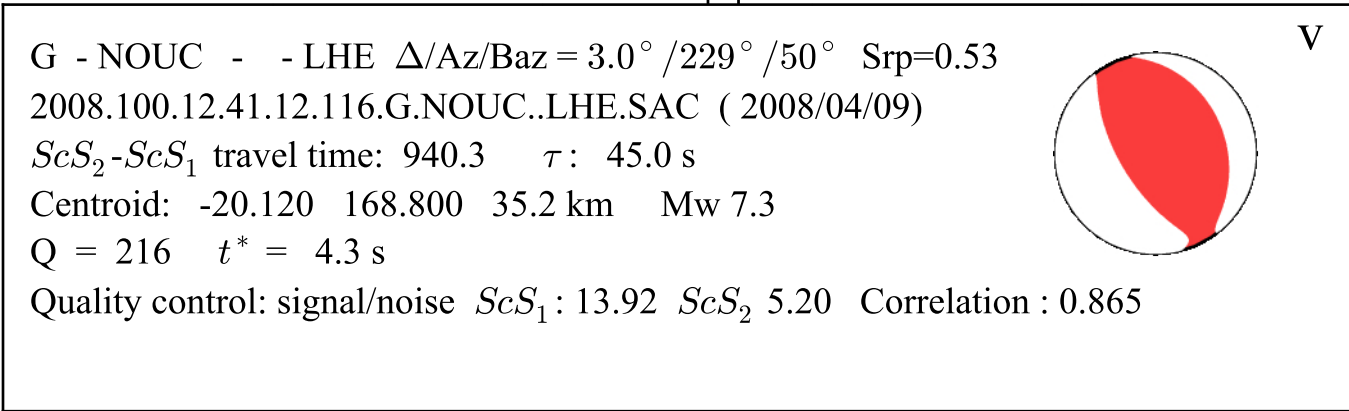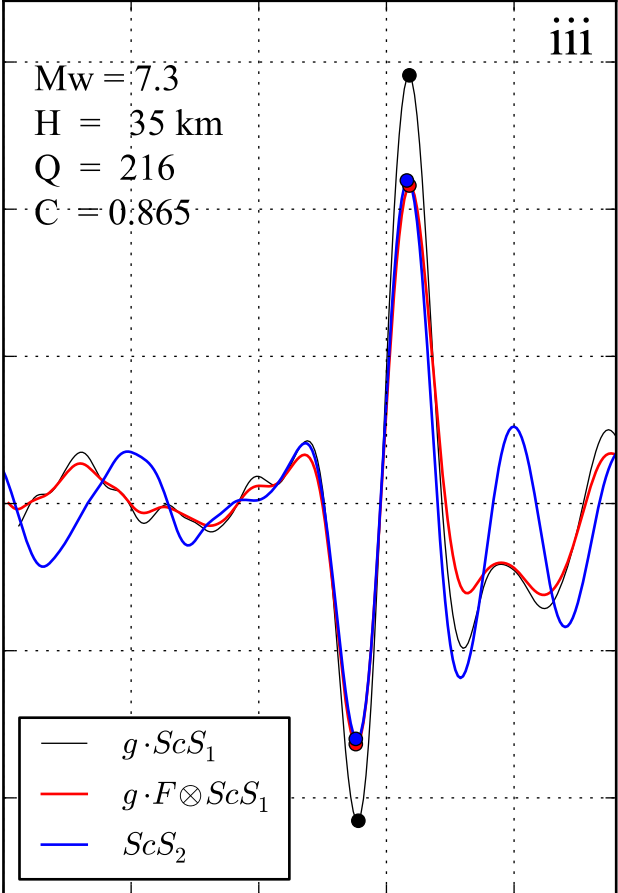

Time [s]

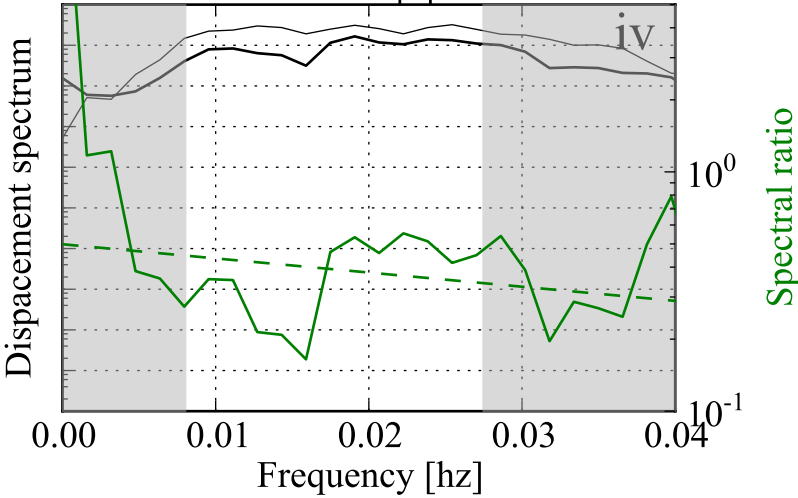

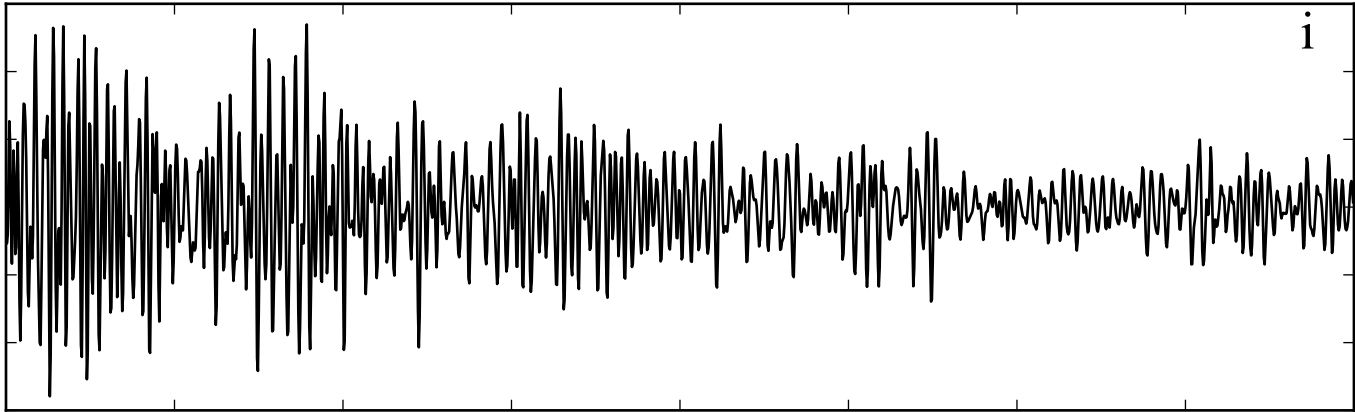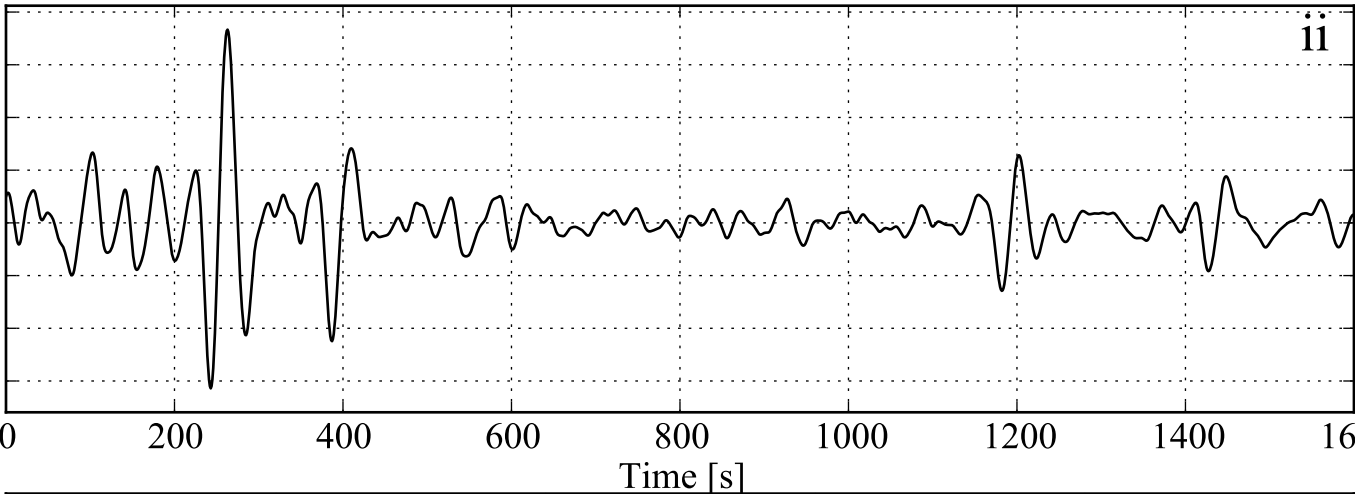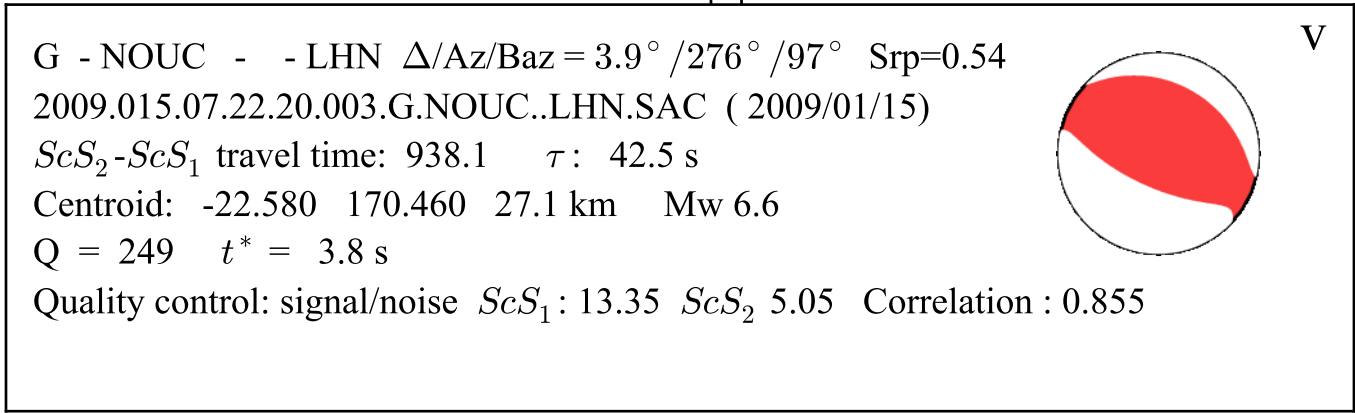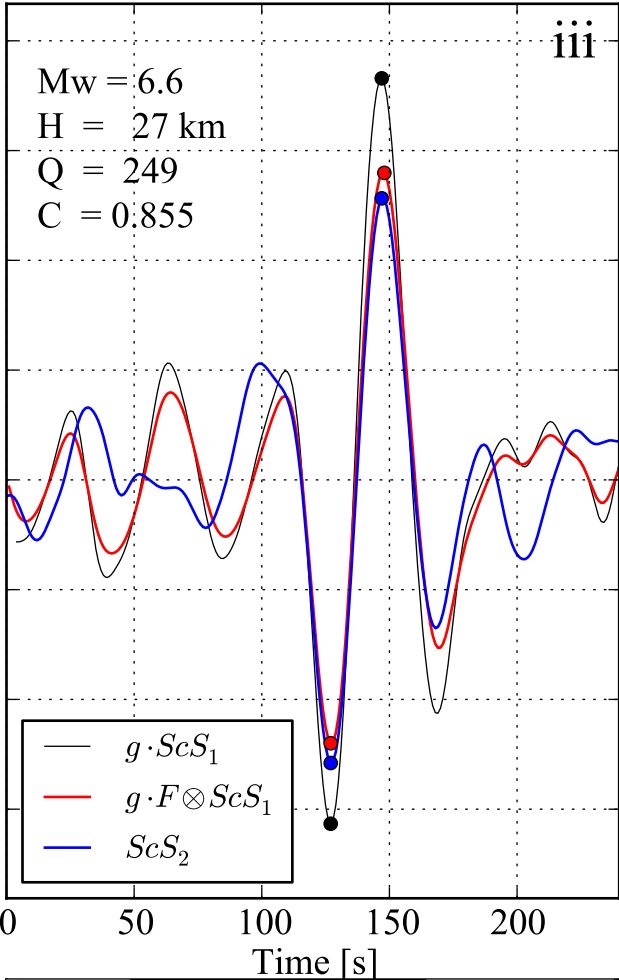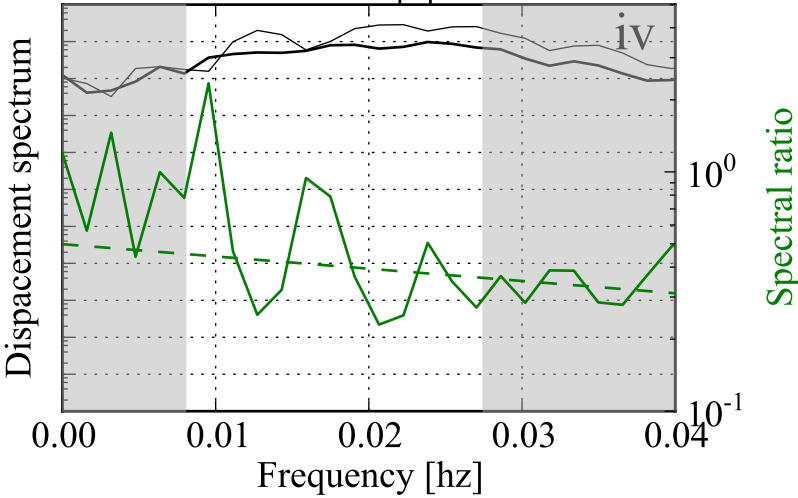

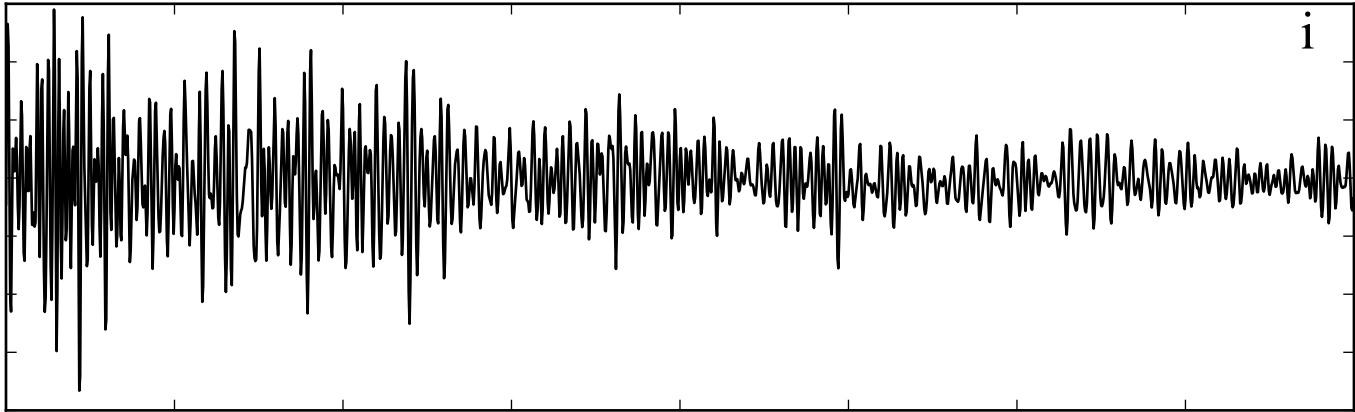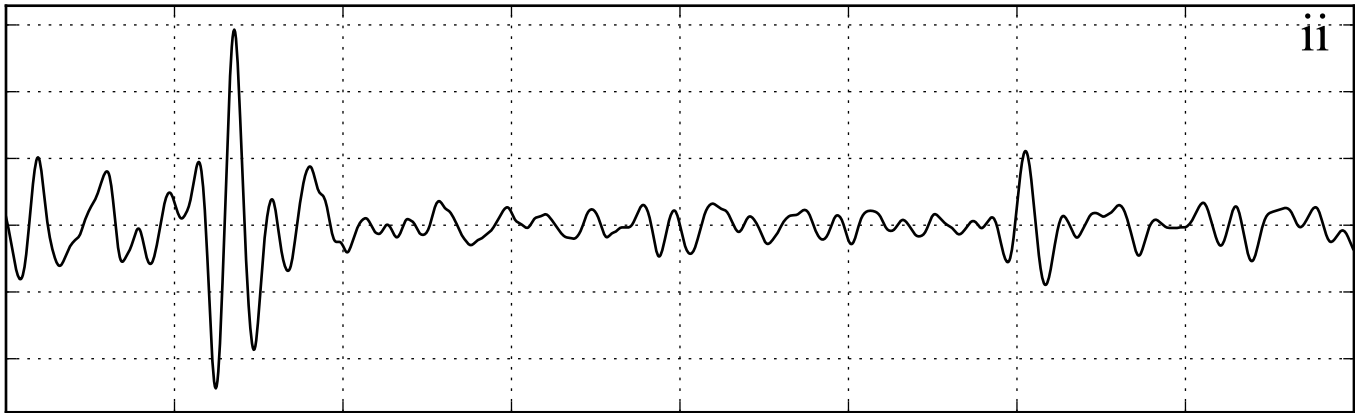

Time [s]

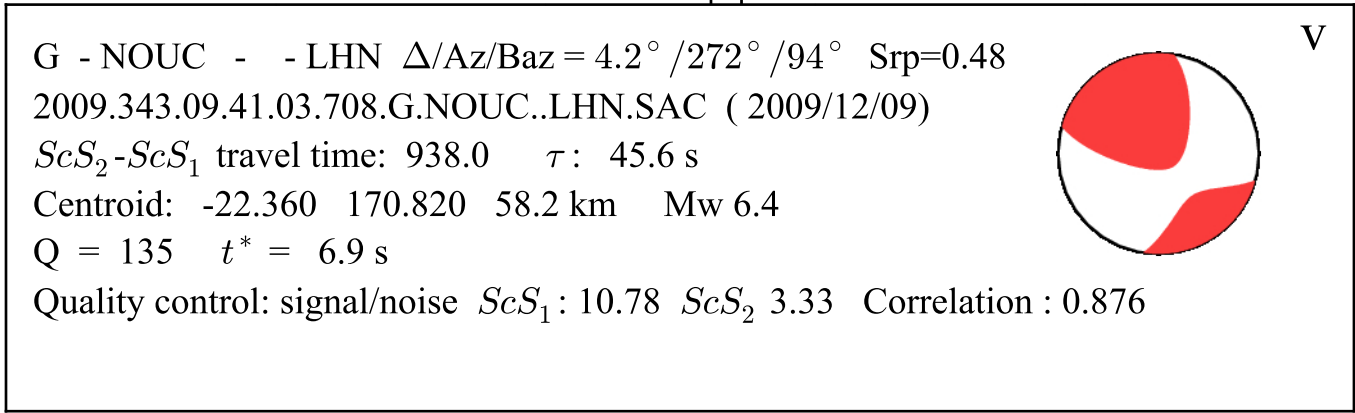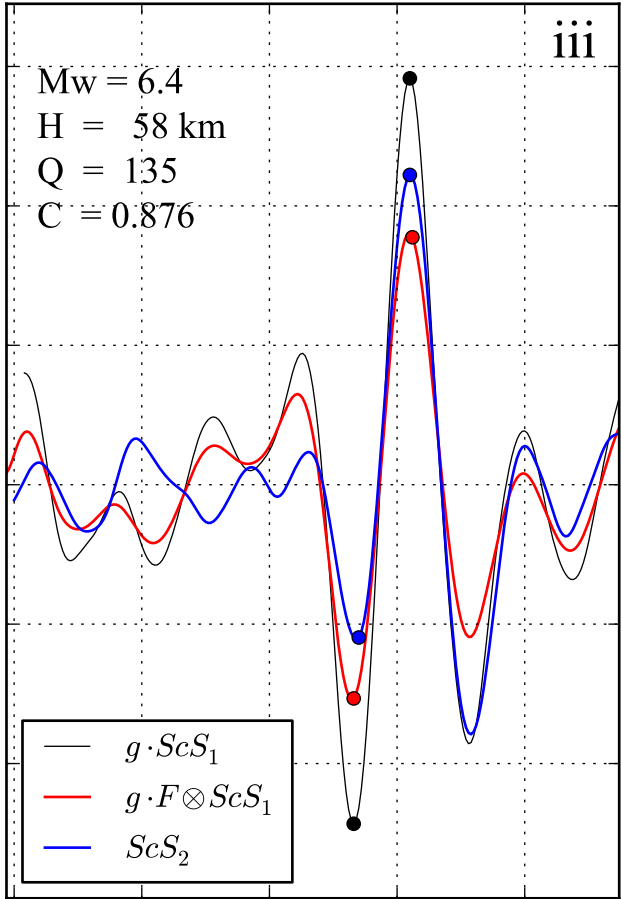

Time [s]

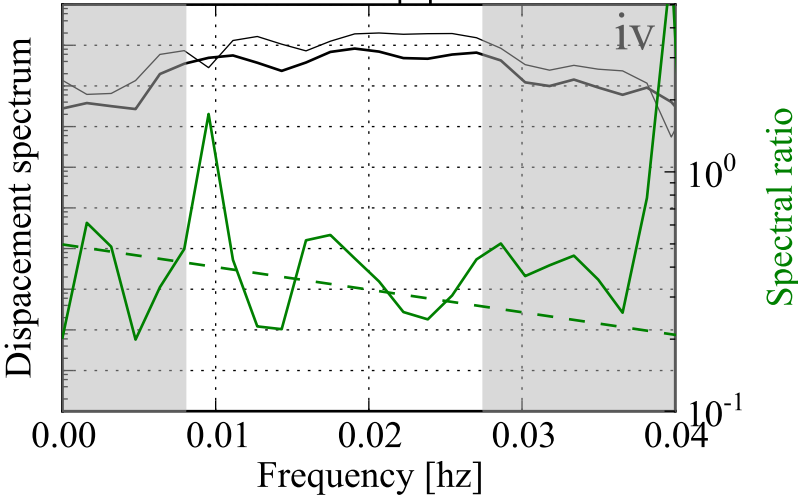

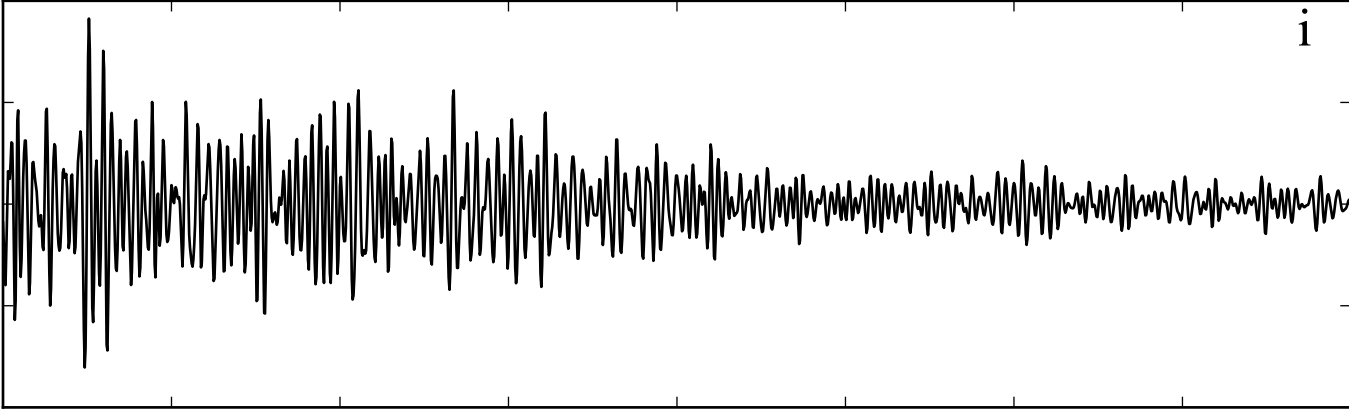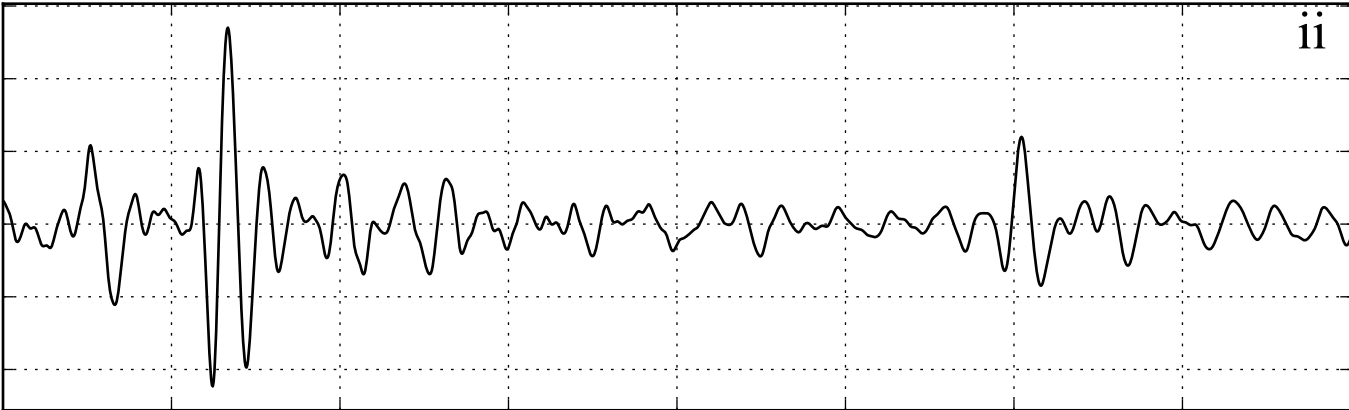

Time [s]

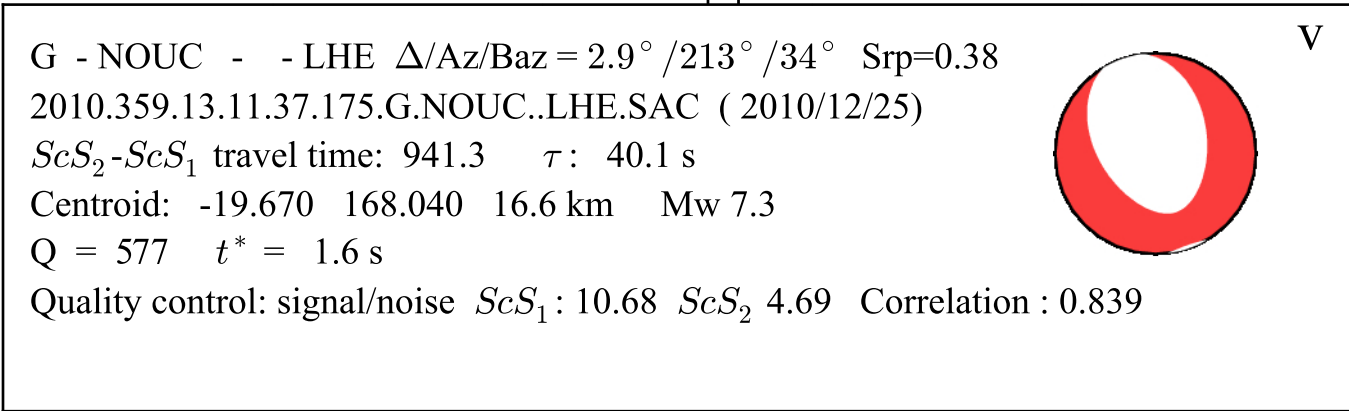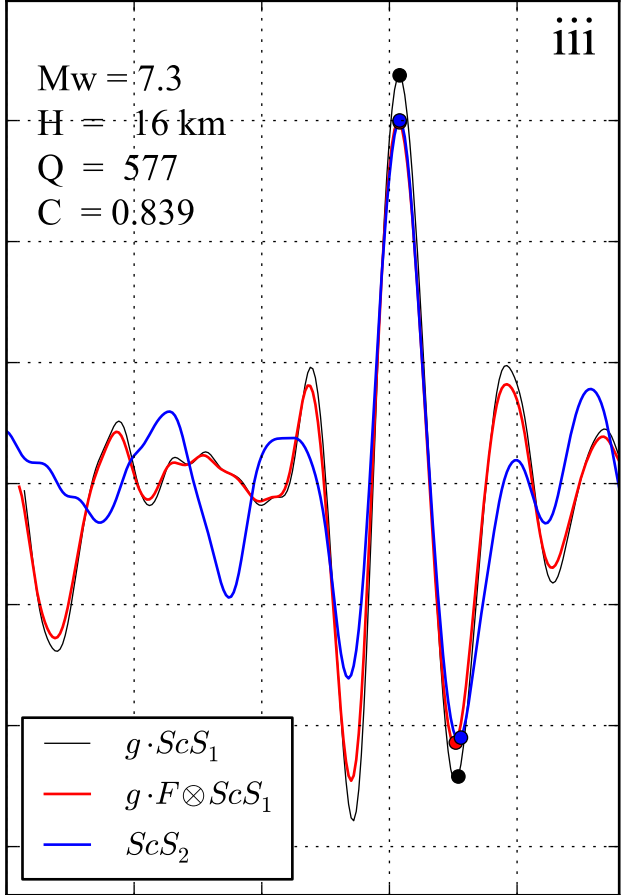

Time [s]

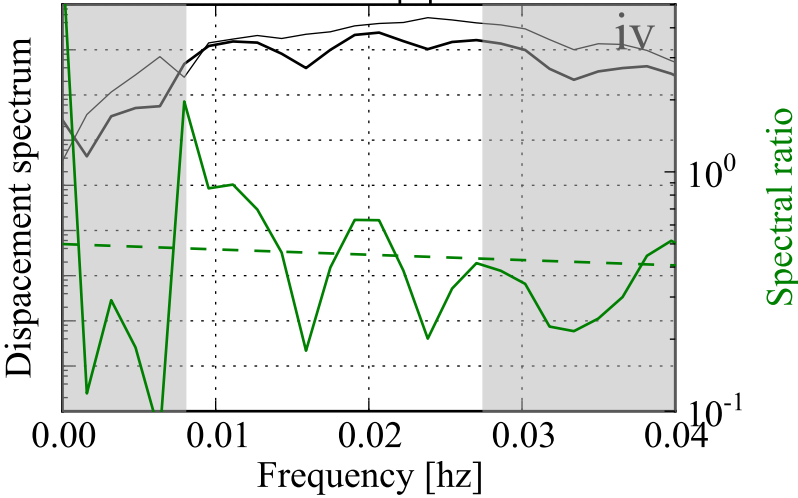

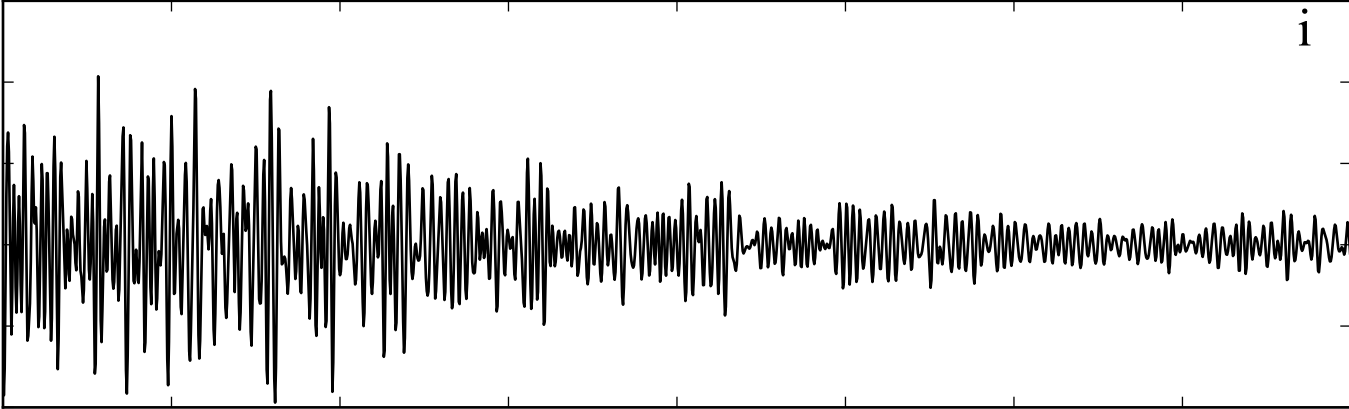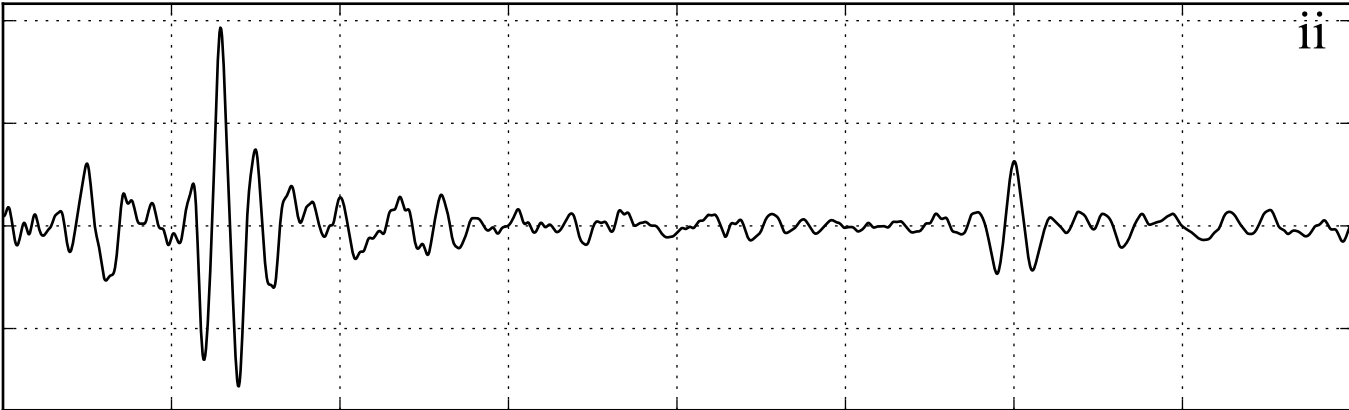

Time [s]

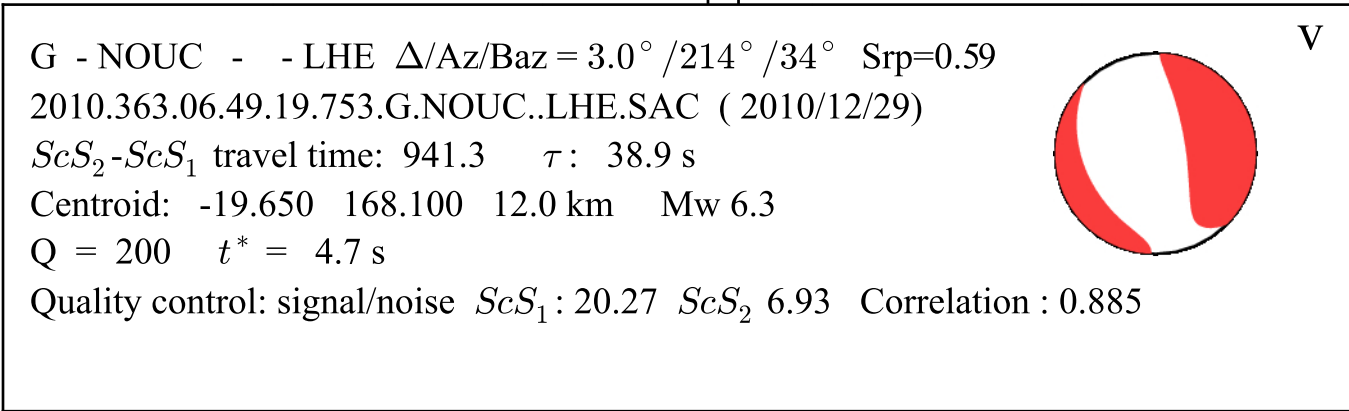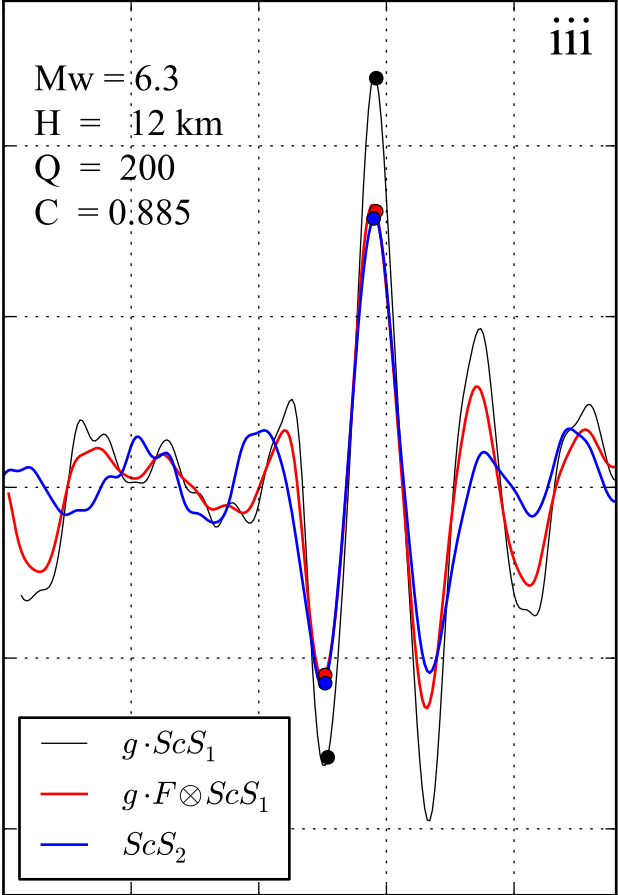

Time [s]

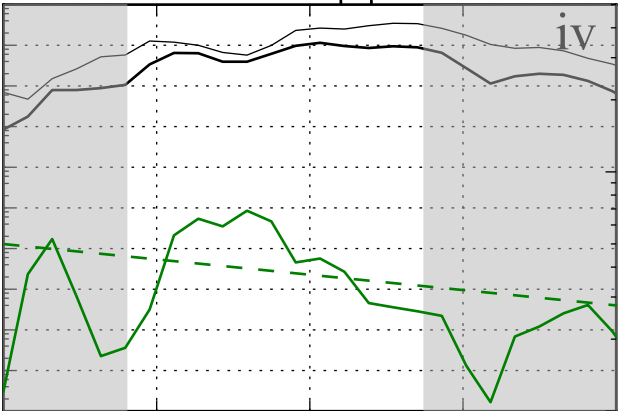

Displacement spectrum

Spectral ratio

Frequency [hz]

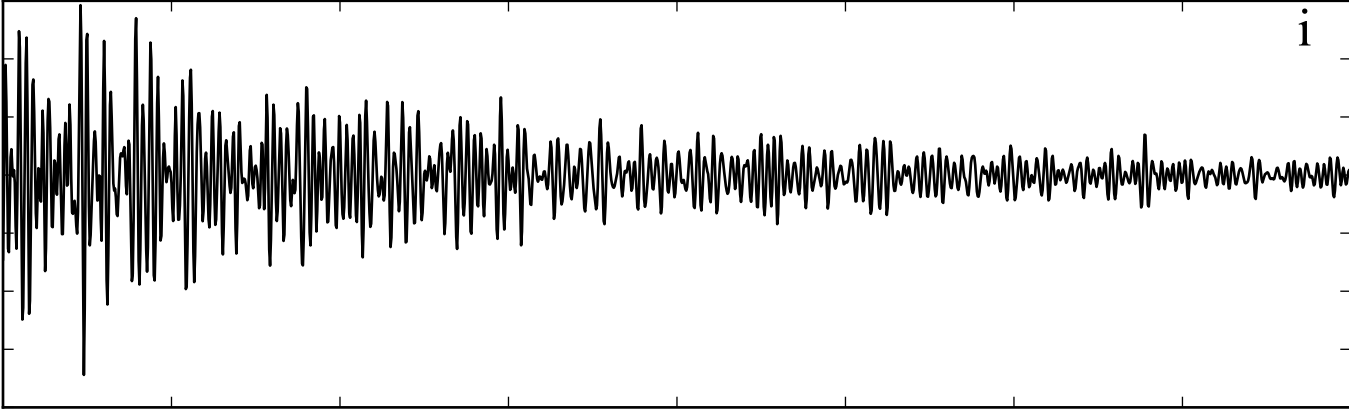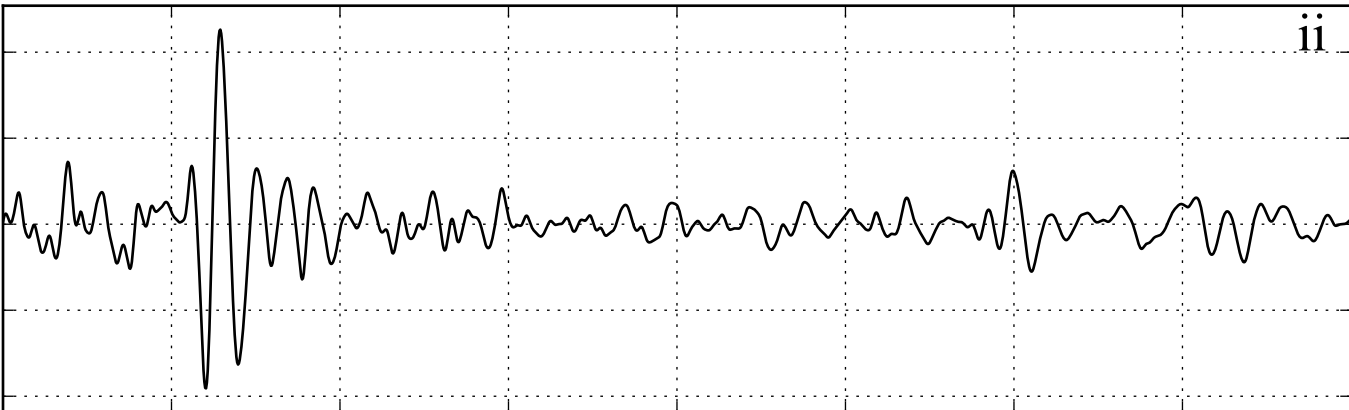

Time [s]

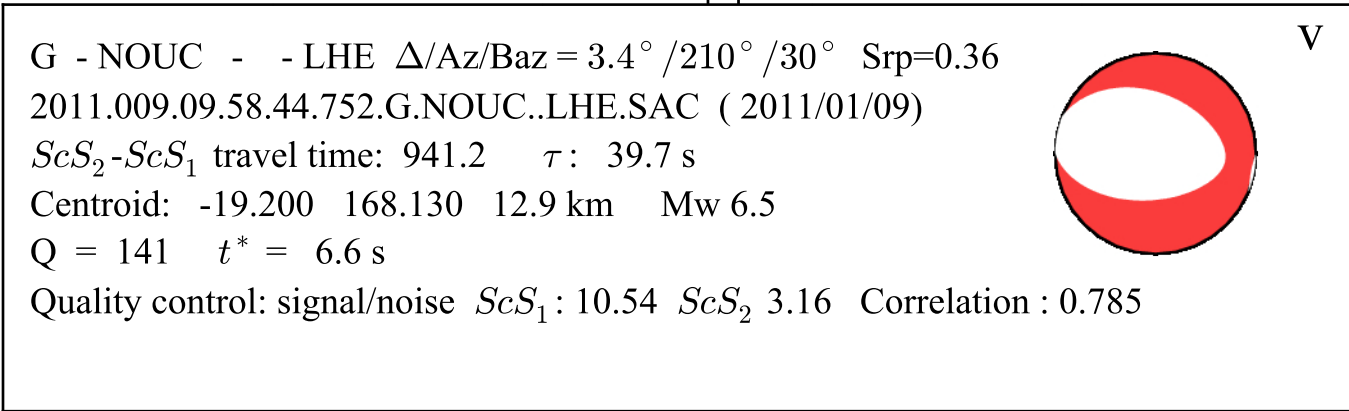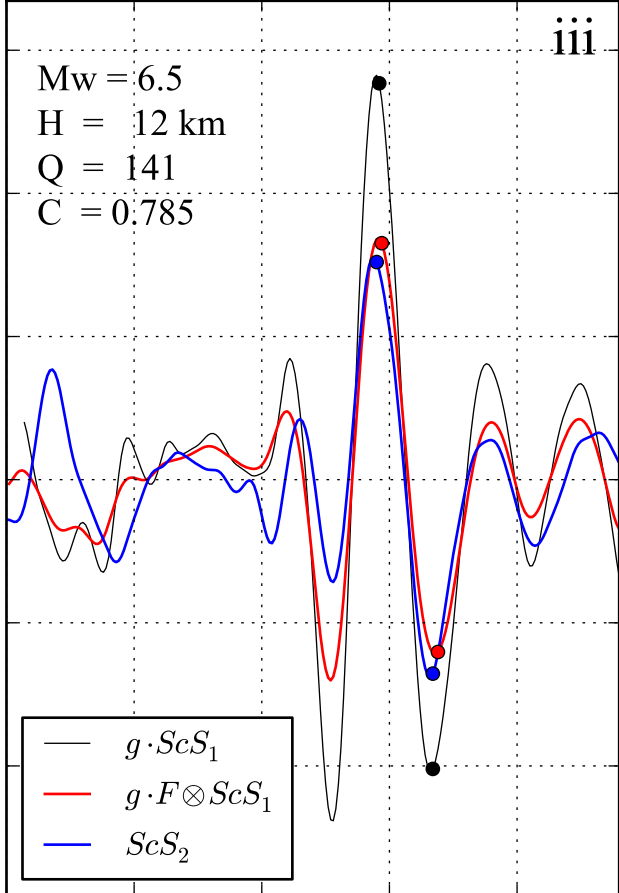

Time [s]

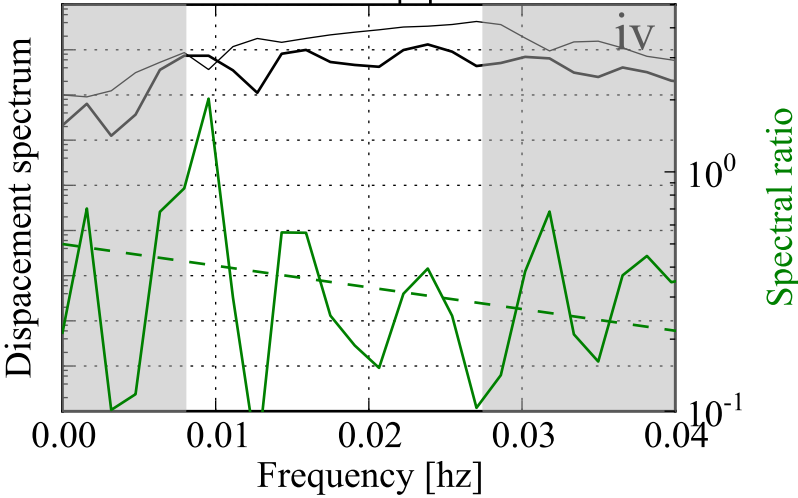

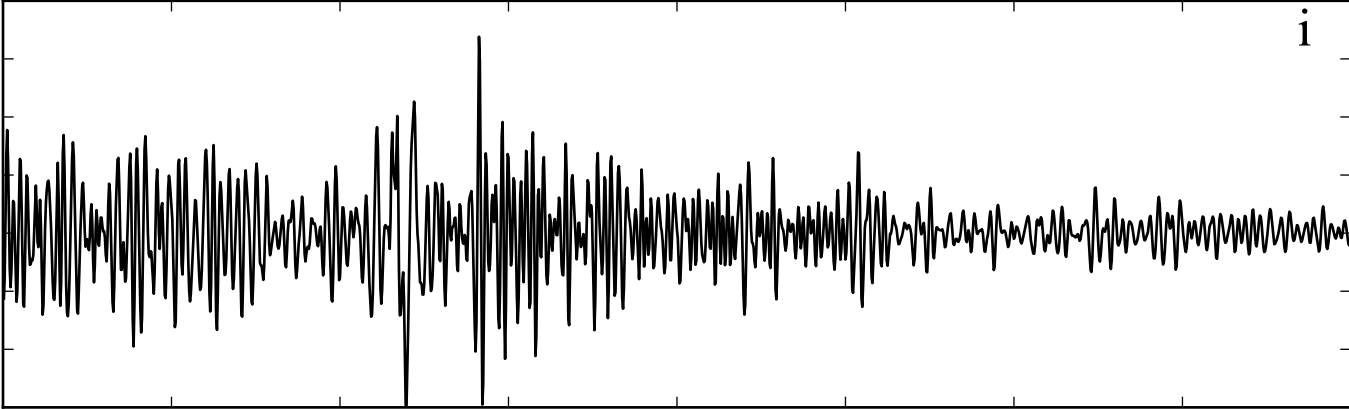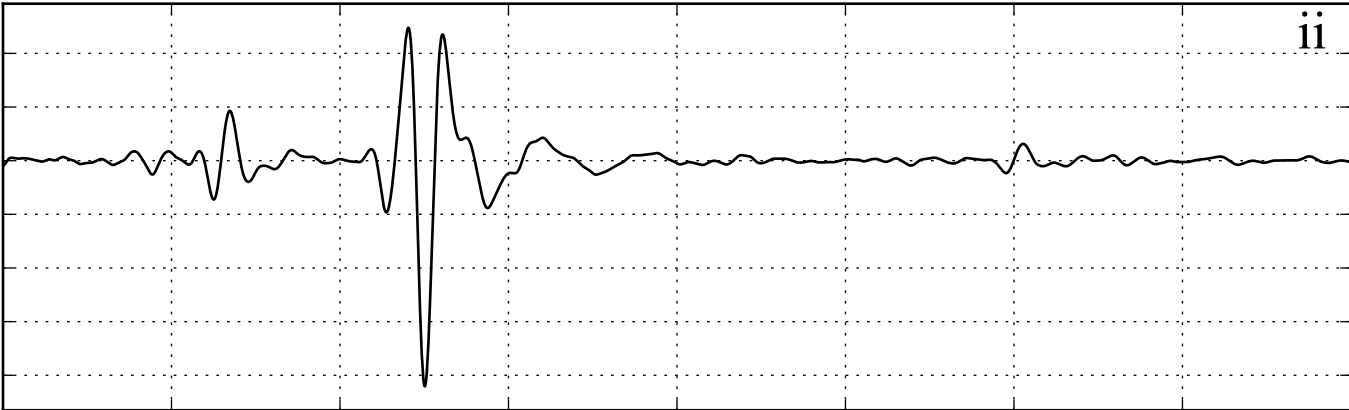

Time [s]

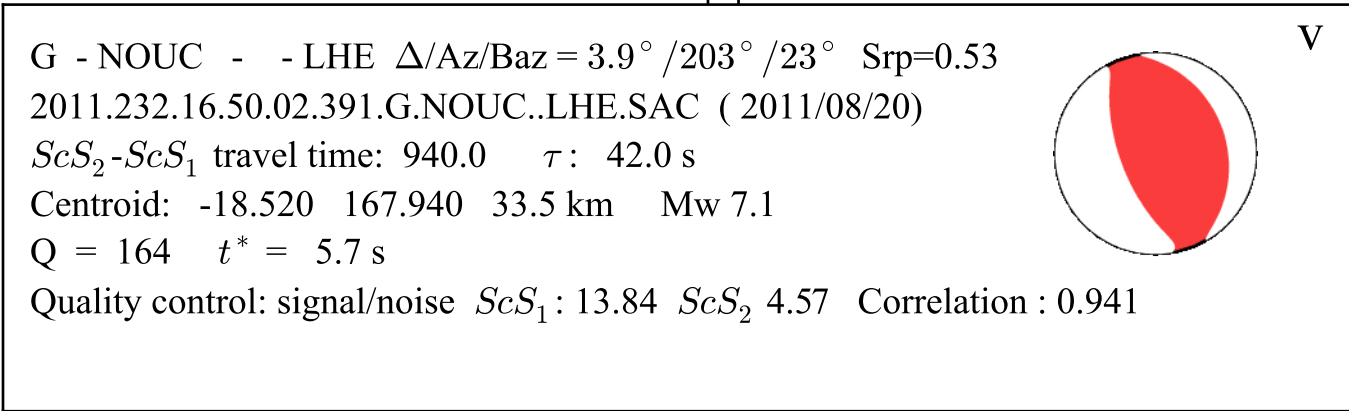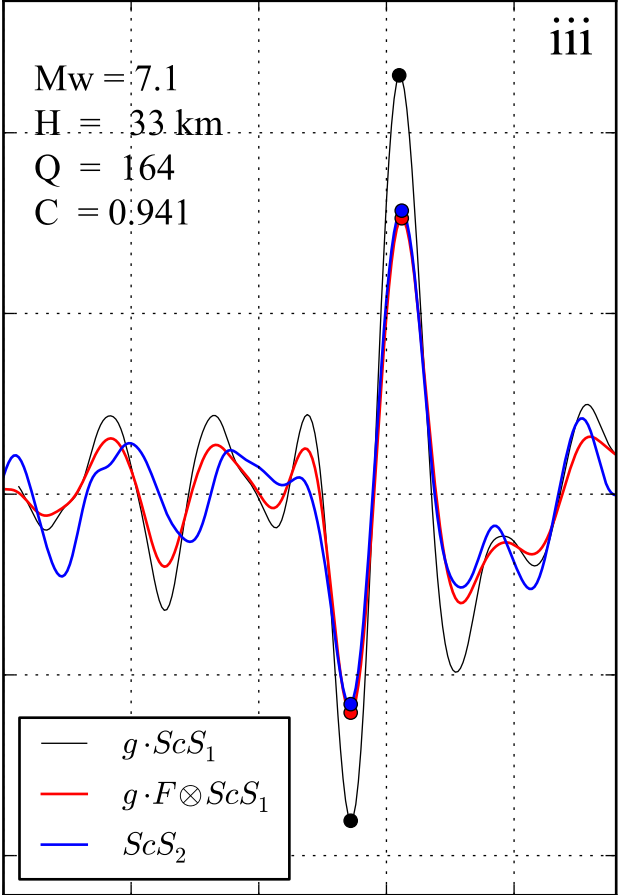

Time [s]

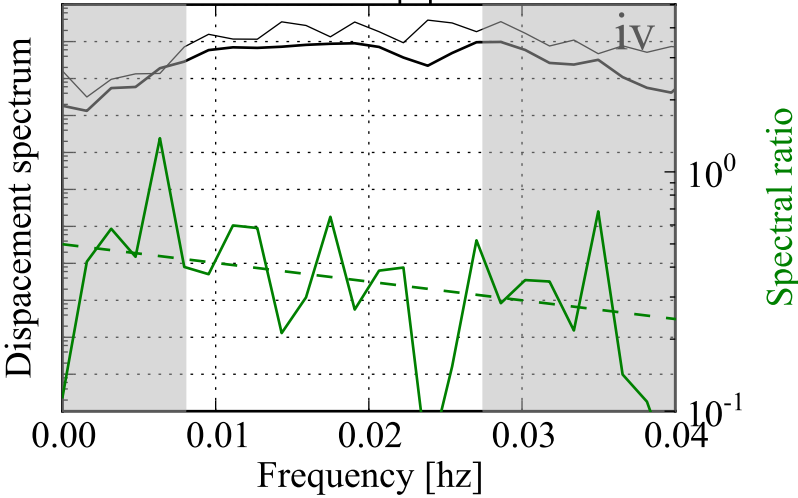

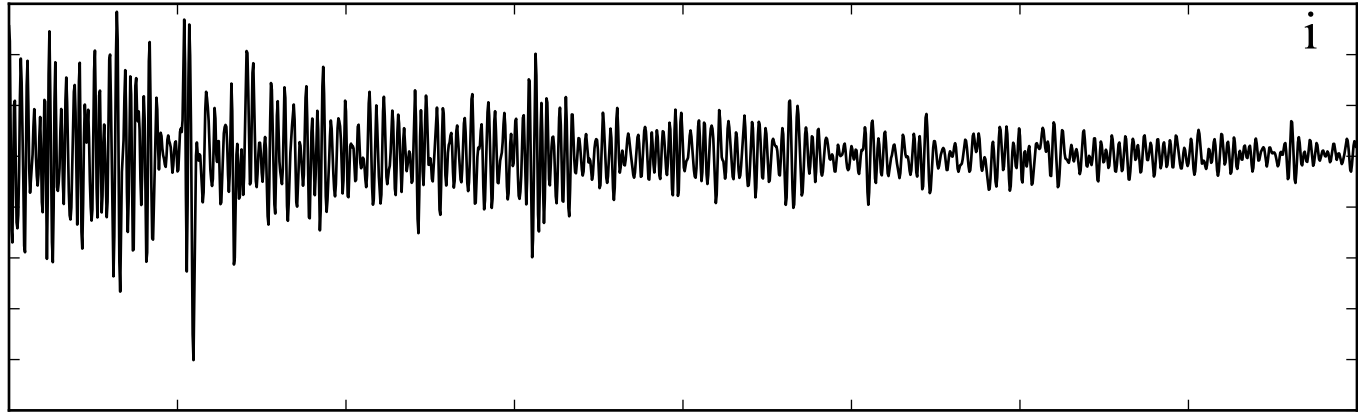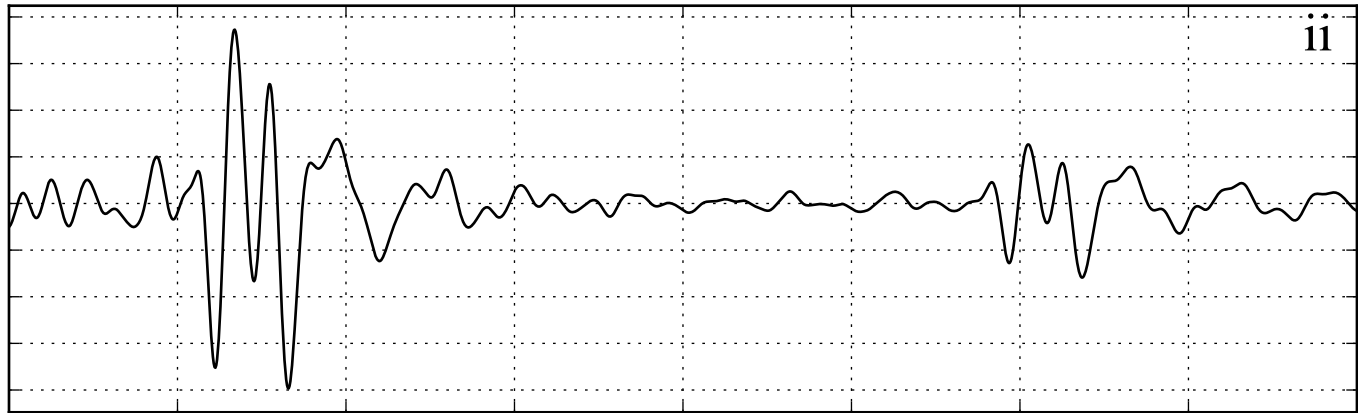

Time [s]

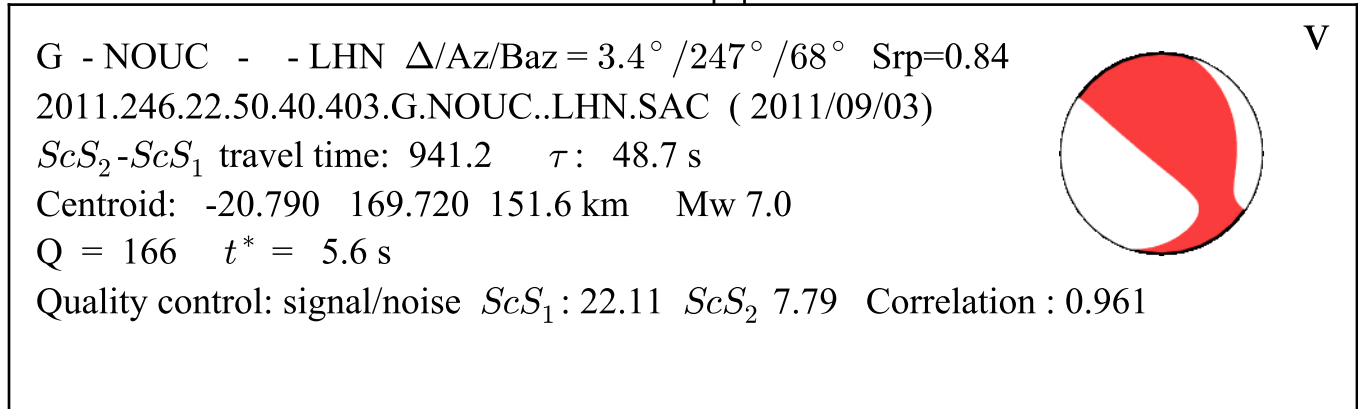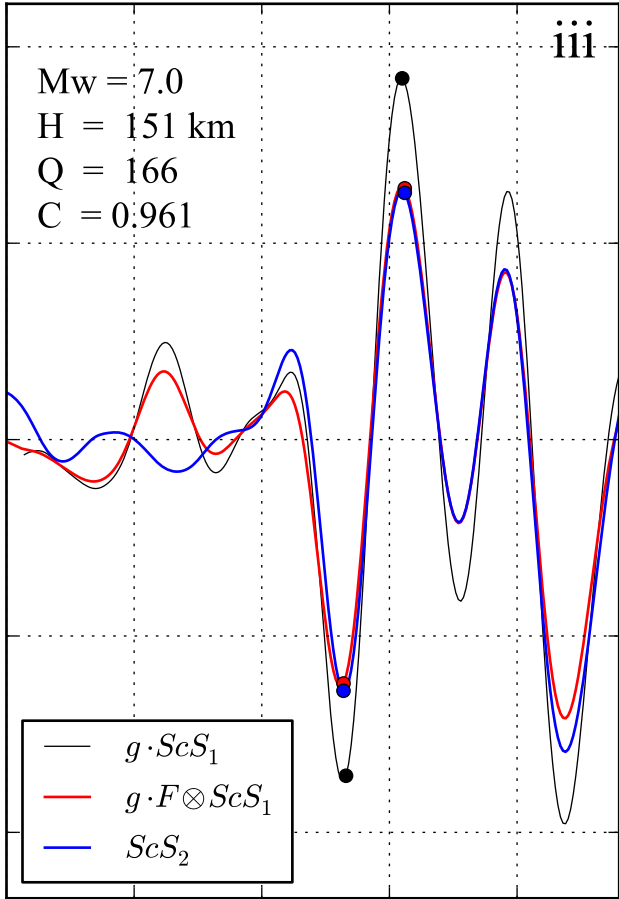

Time [s]

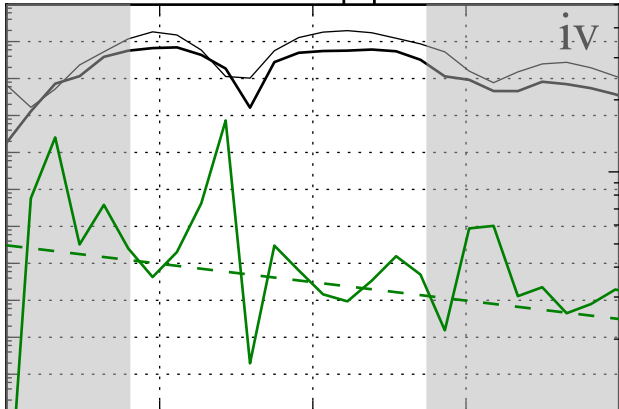

Frequency [hz]



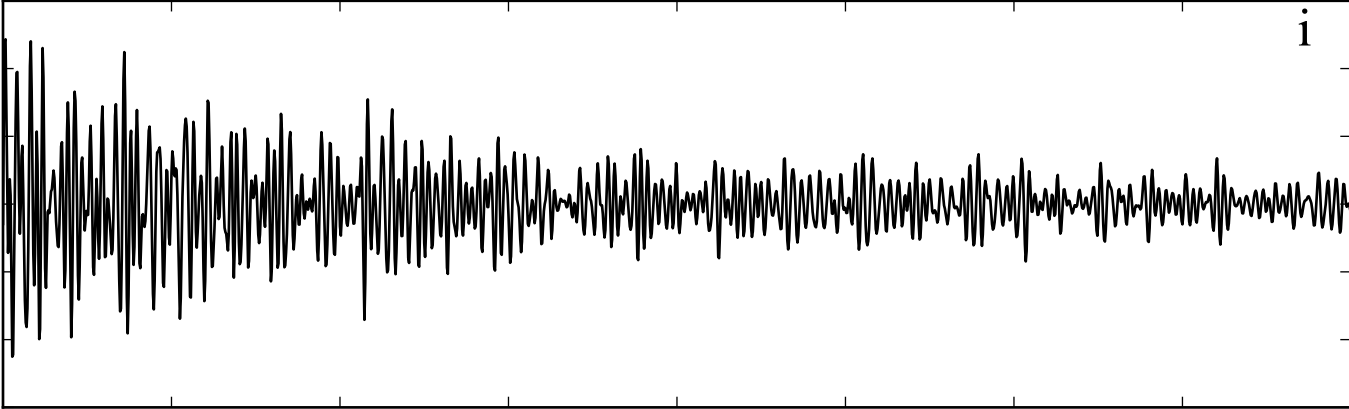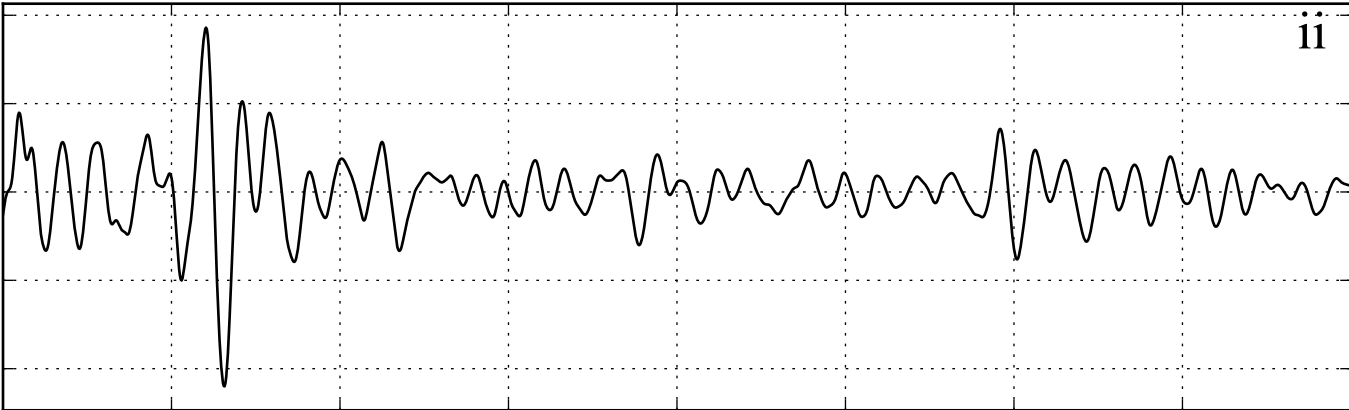

Time [s]

G - NOUC - - LHN  $\Delta/Az/Baz = 4.5^\circ/189^\circ/9^\circ$   $Srp=0.28$   
2012.033.13.29.40.013.G.NOUC..LHN.SAC ( 2012/02/02)  
 $ScS_2-ScS_1$  travel time: 940.8  $\tau$ : 46.4 s  
Centroid: -17.690 167.110 20.5 km Mw 7.0  
 $Q = 186$   $t^* = 5.1$  s  
Quality control: signal/noise  $ScS_1$ : 8.59  $ScS_2$  3.12 Correlation : 0.866

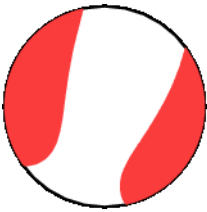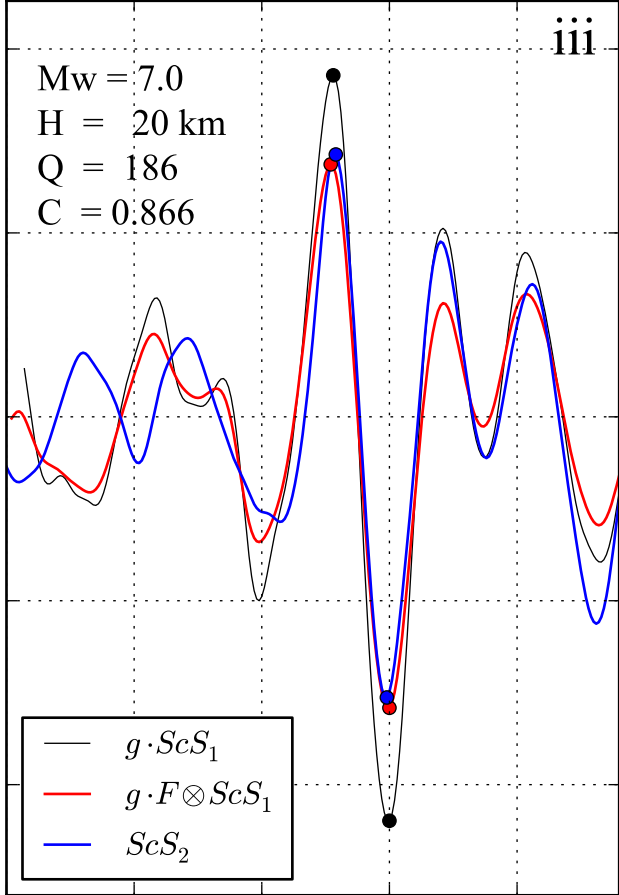

Time [s]

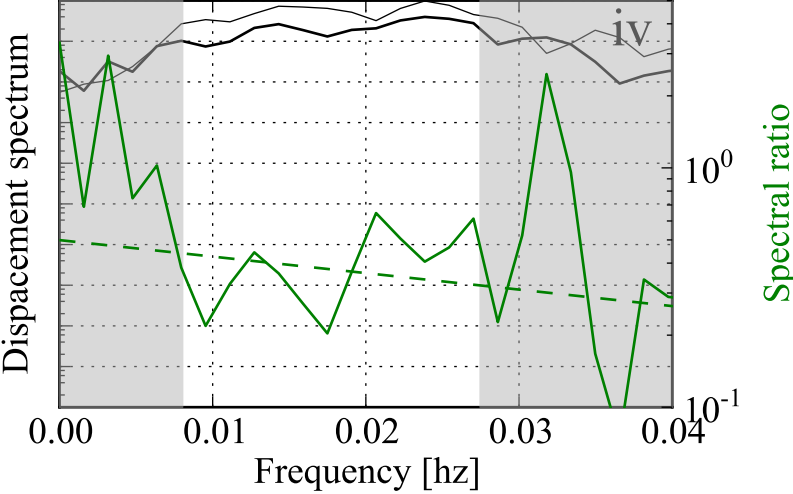

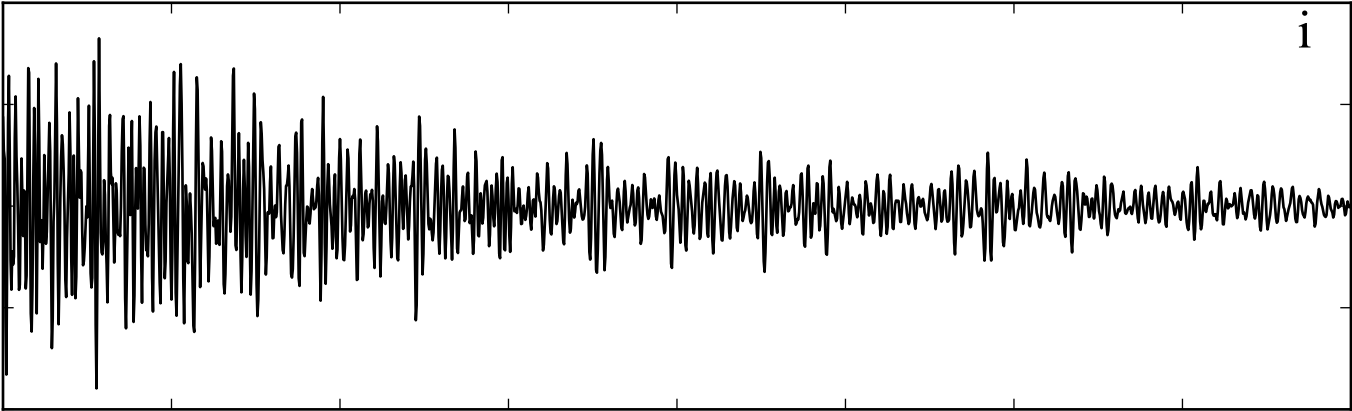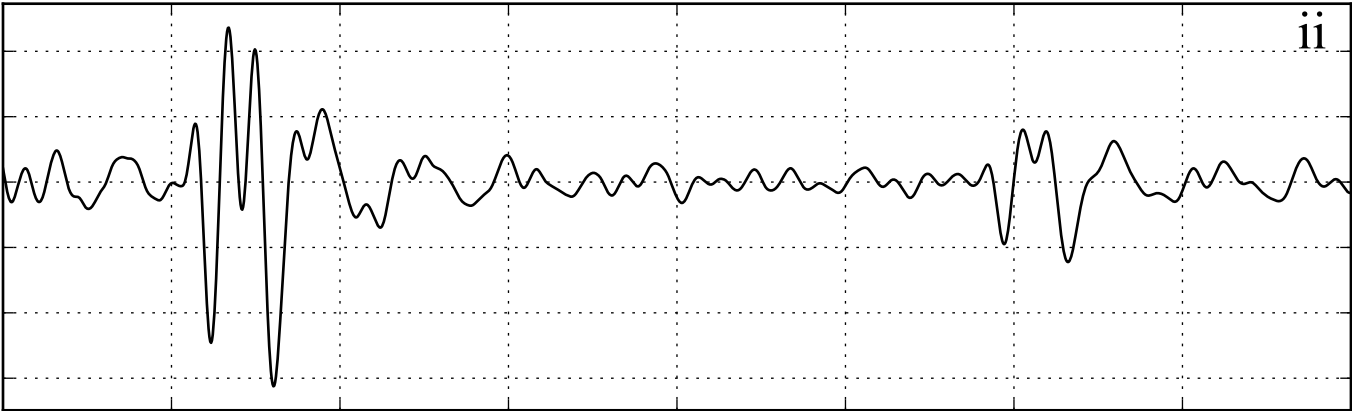

Time [s]

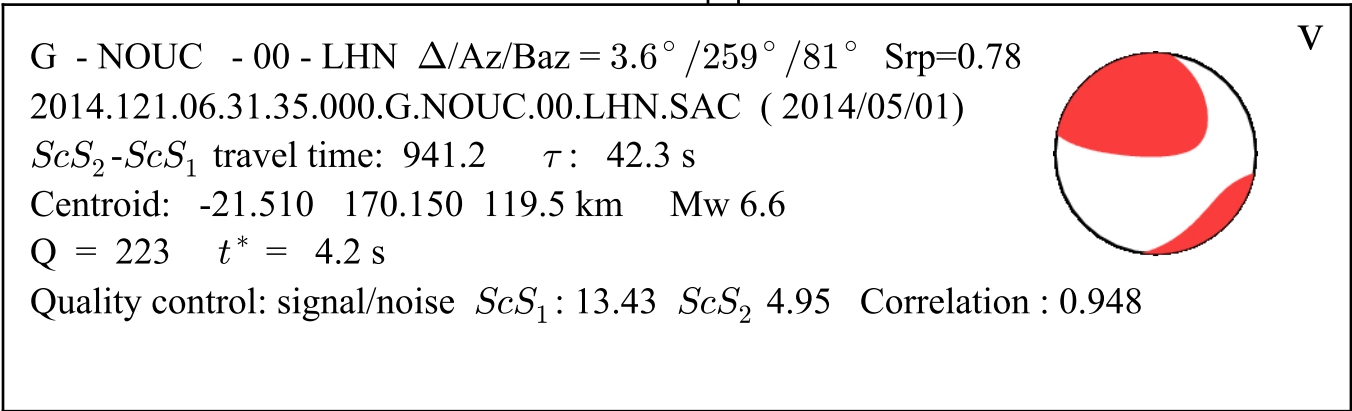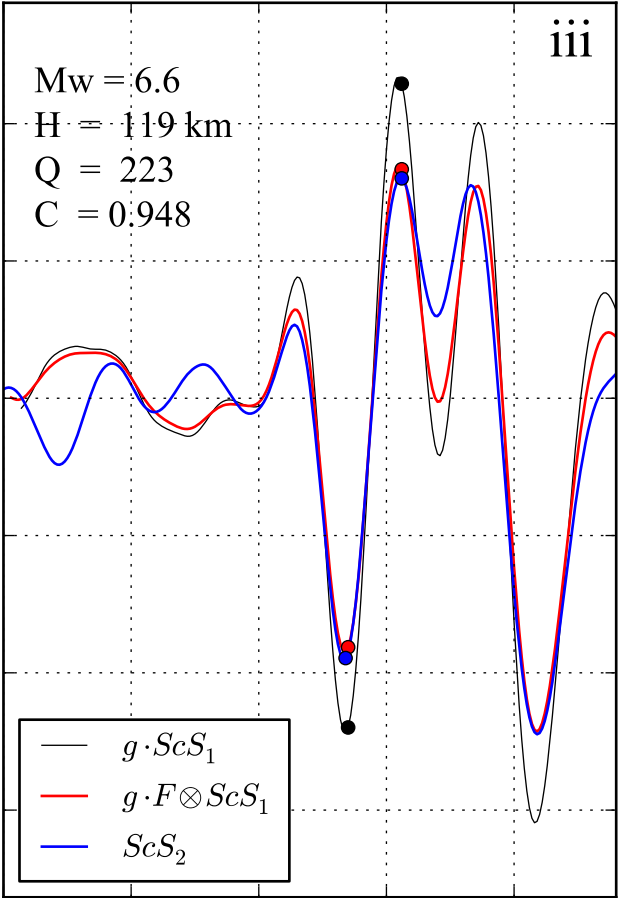

Time [s]

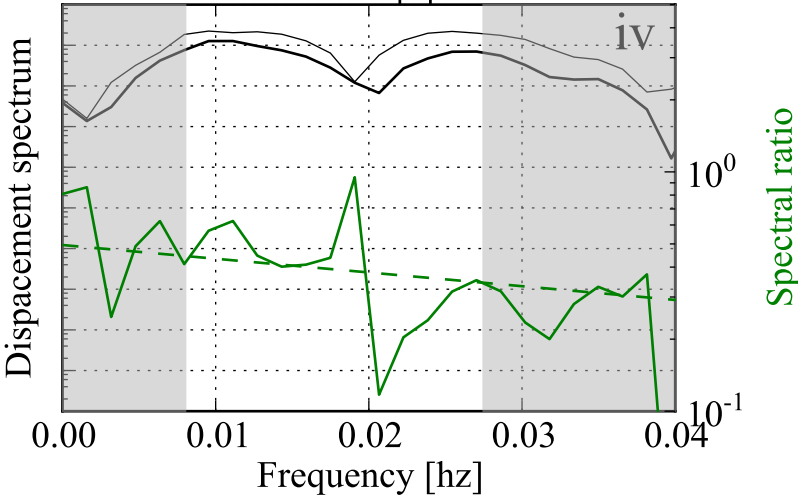

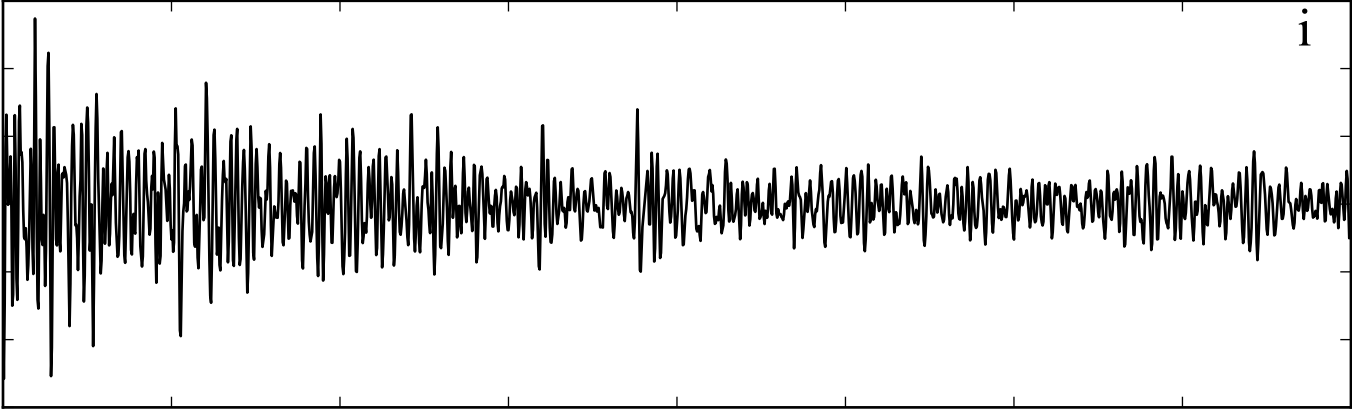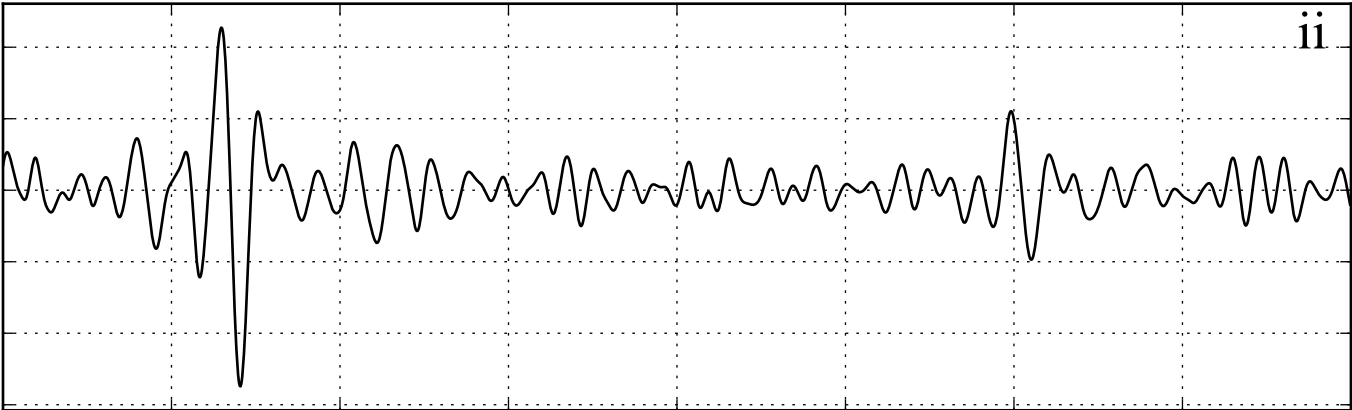

Time [s]

US - OCWA - - LHE  $\Delta/Az/Baz = 1.3^\circ/299^\circ/117^\circ$   $Srp=0.83$   
2001.059.18.49.32.389.US.OCWA..LHE.SAC ( 2001/02/28)  
 $ScS_2-ScS_1$  travel time: 939.3  $\tau$ : 47.3 s  
Centroid: 47.140 -122.530 46.8 km Mw 6.8  
 $Q = 314$   $t^* = 3.0$  s  
Quality control: signal/noise  $ScS_1$ : 9.18  $ScS_2$  3.79 Correlation : 0.874

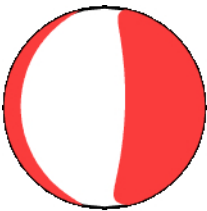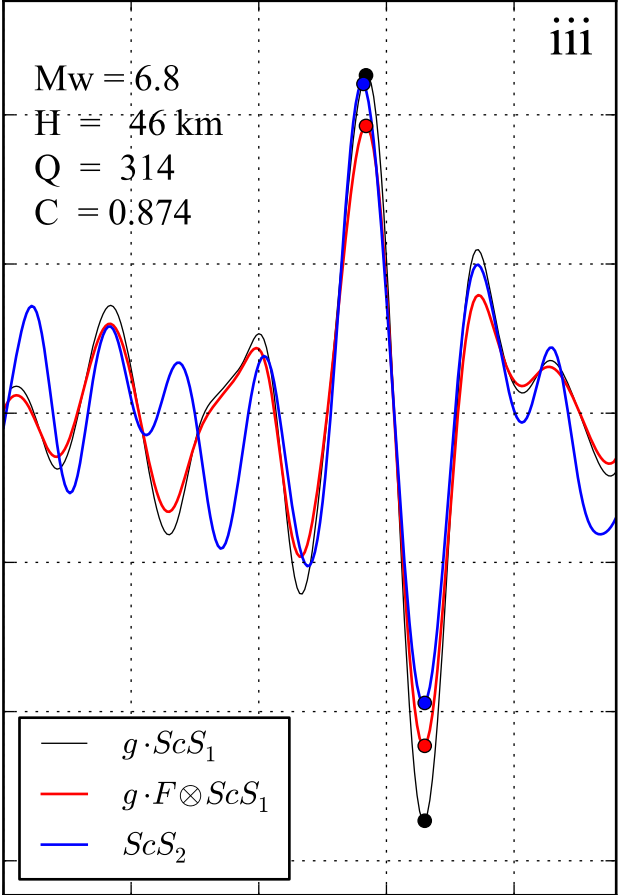

Time [s]

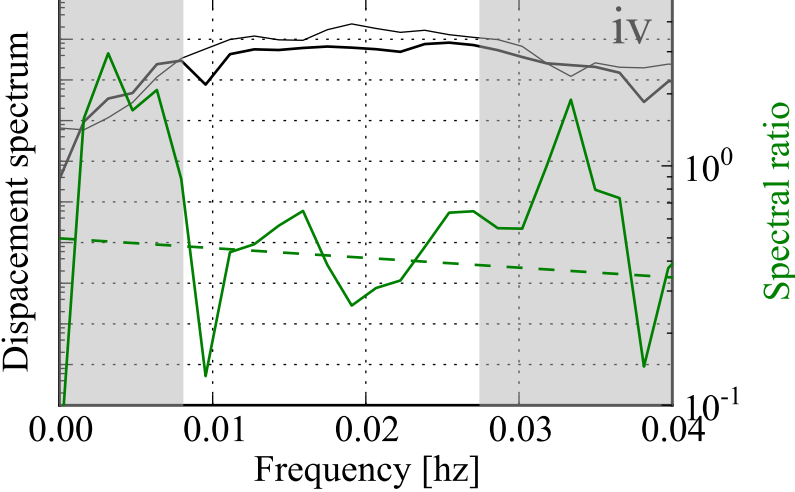

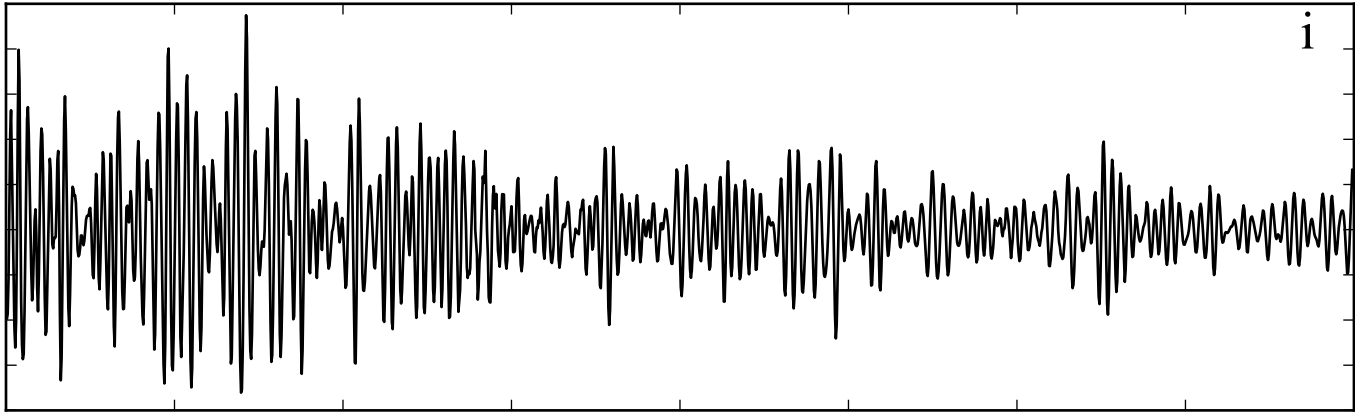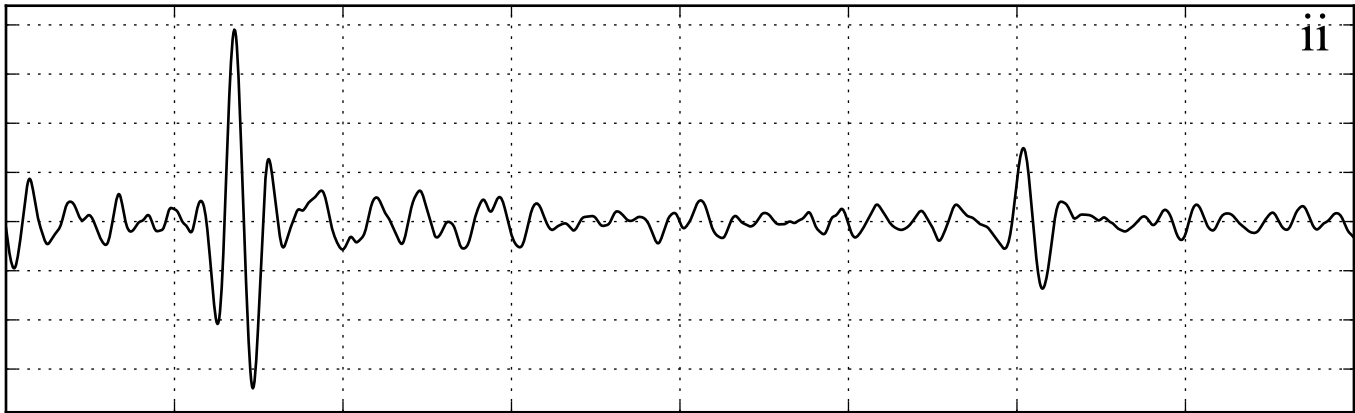

Time [s]

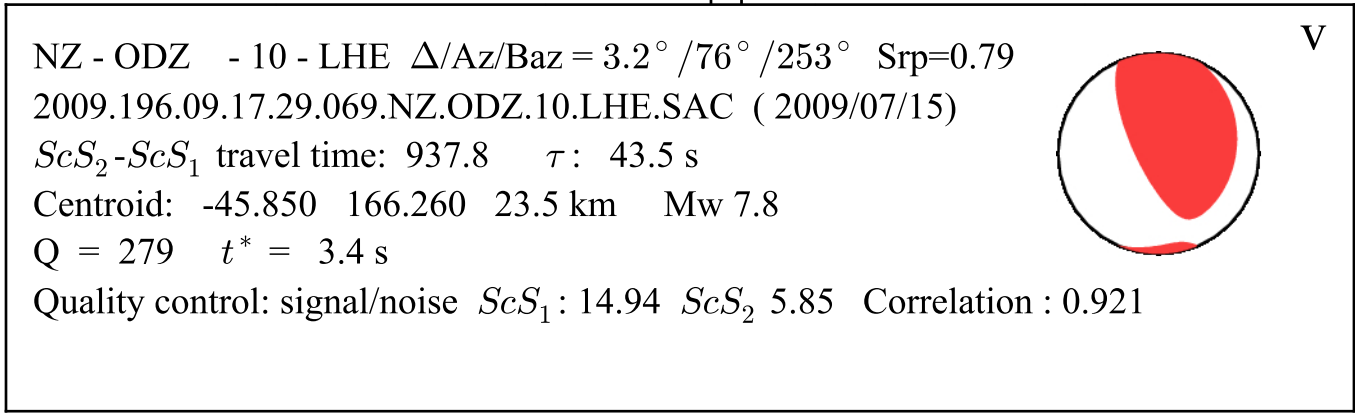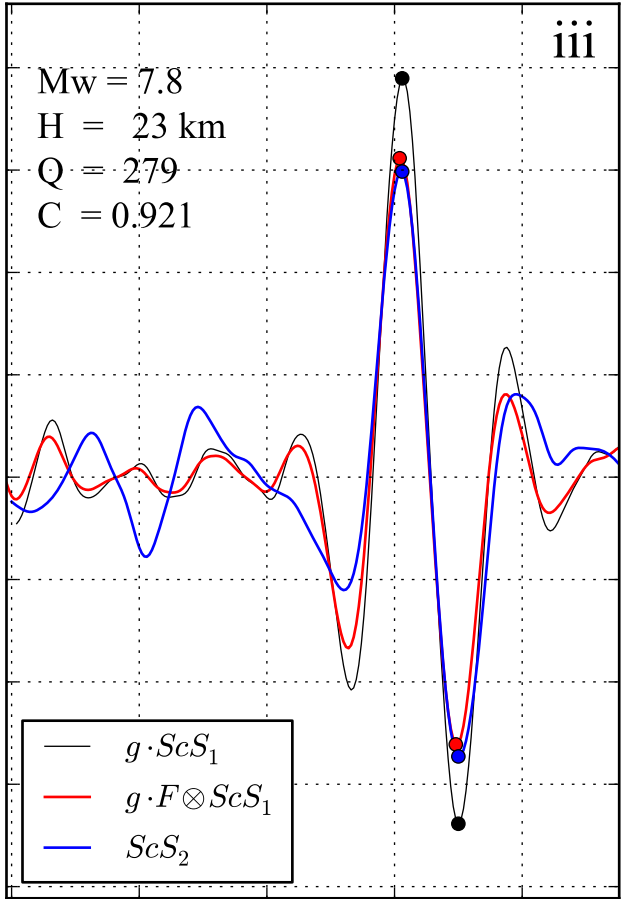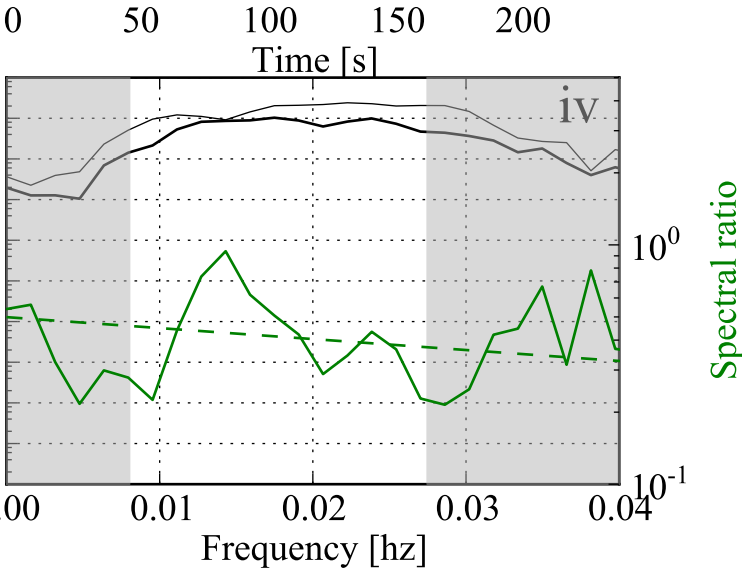

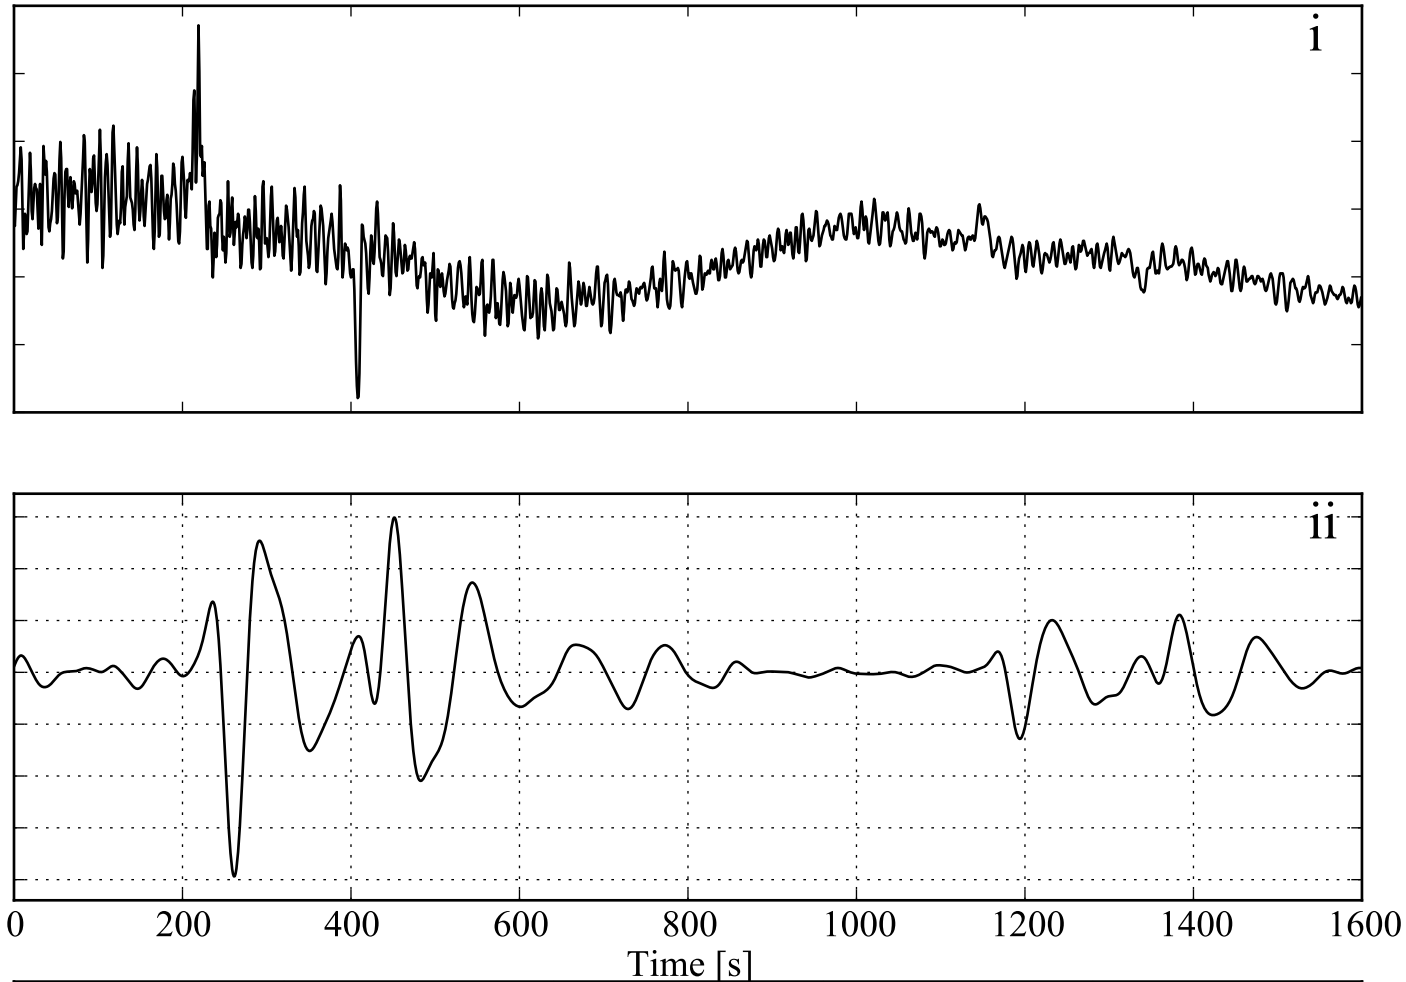

PS - OGS - - LHE  $\Delta/Az/Baz = 3.1^\circ / 127^\circ / 309^\circ$   $Srp=0.88$   
 1998.232.06.35.55.000.PS.OGS..LHE.SAC ( 1998/08/20)  
 $ScS_2$ - $ScS_1$  travel time: 933.7  $\tau$ : 61.0 s  
 Centroid: 28.990 139.470 425.5 km Mw 7.1  
 $Q = 146$   $t^* = 6.4$  s  
 Quality control: signal/noise  $ScS_1$ : 21.58  $ScS_2$  7.64 Correlation : 0.968

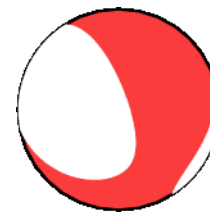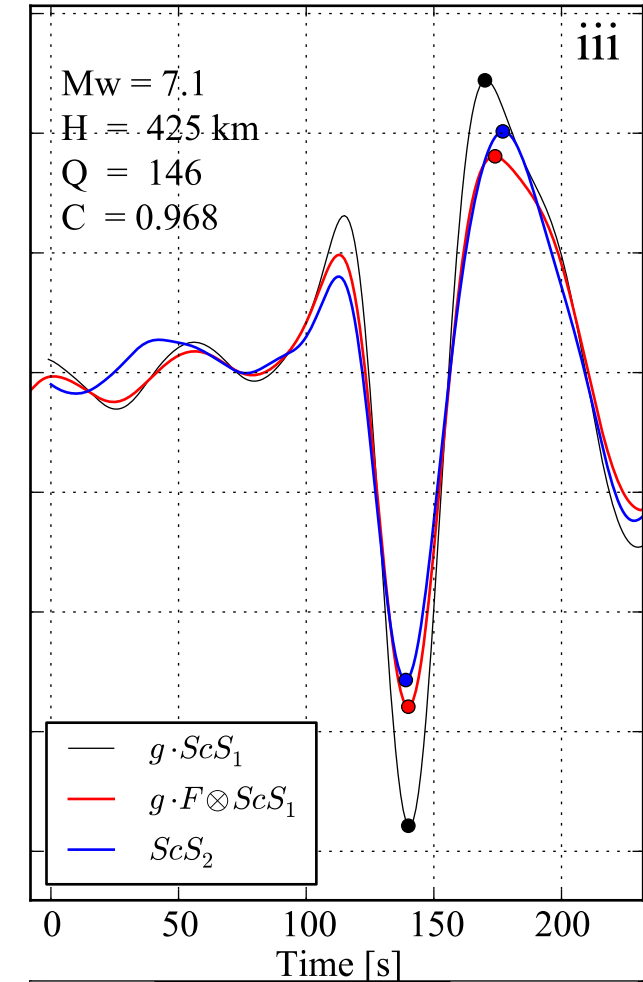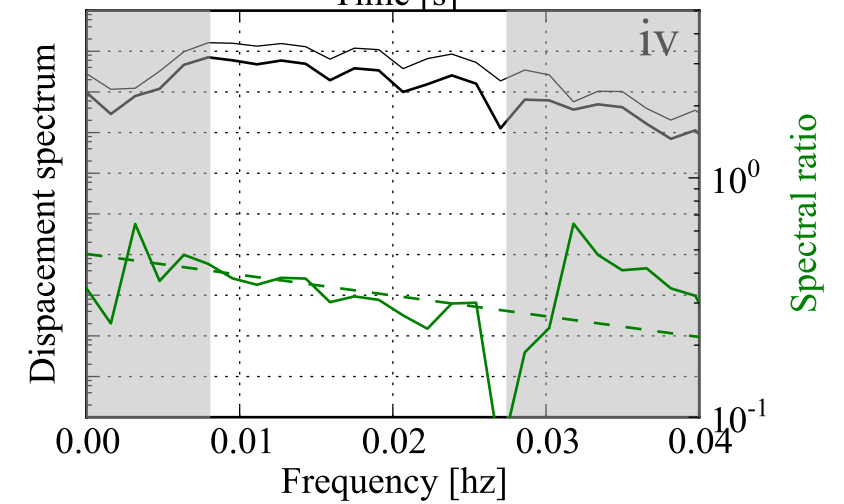

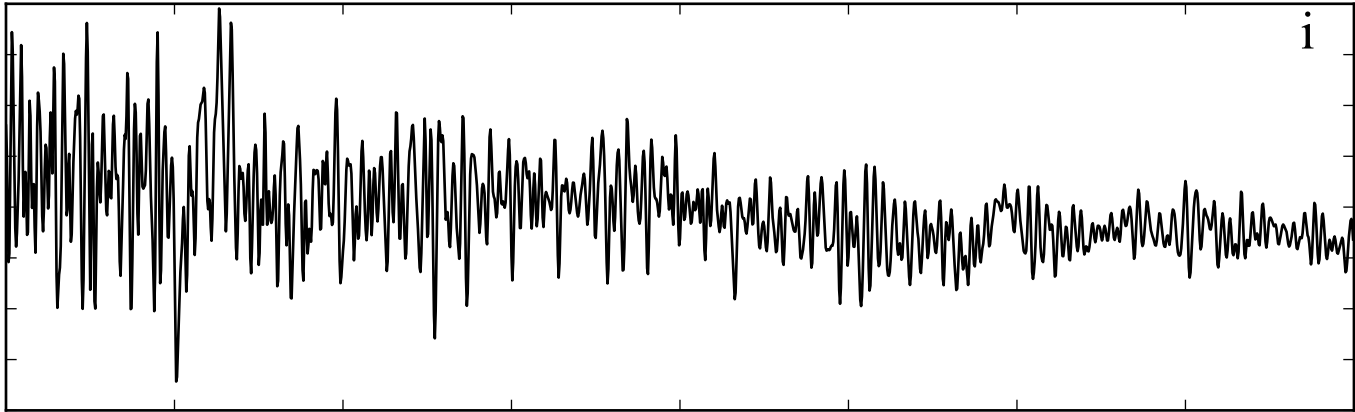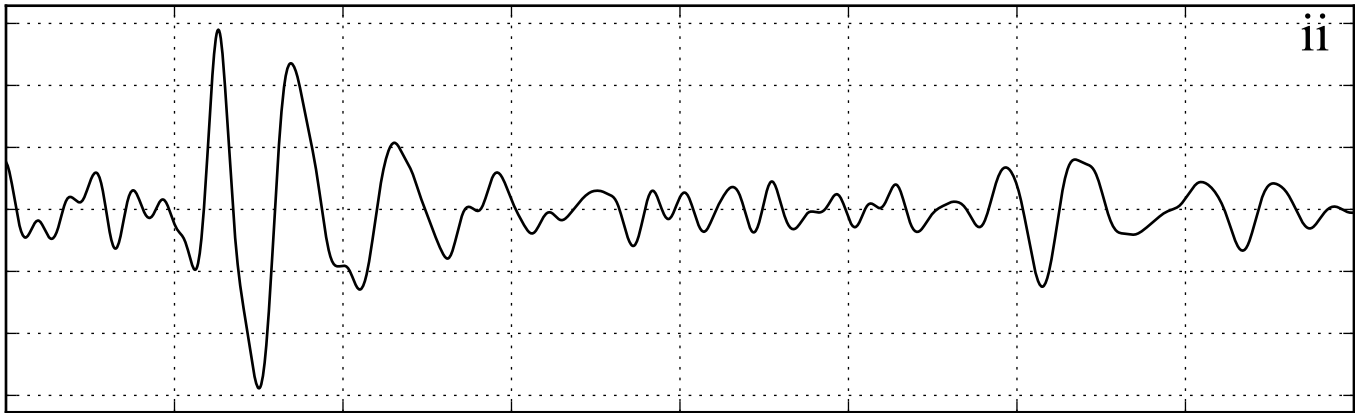

Time [s]

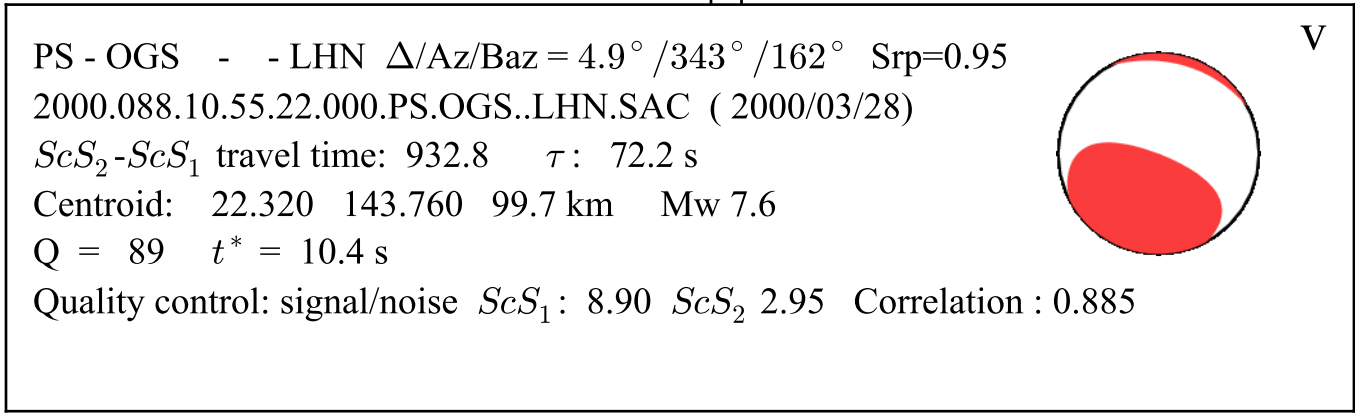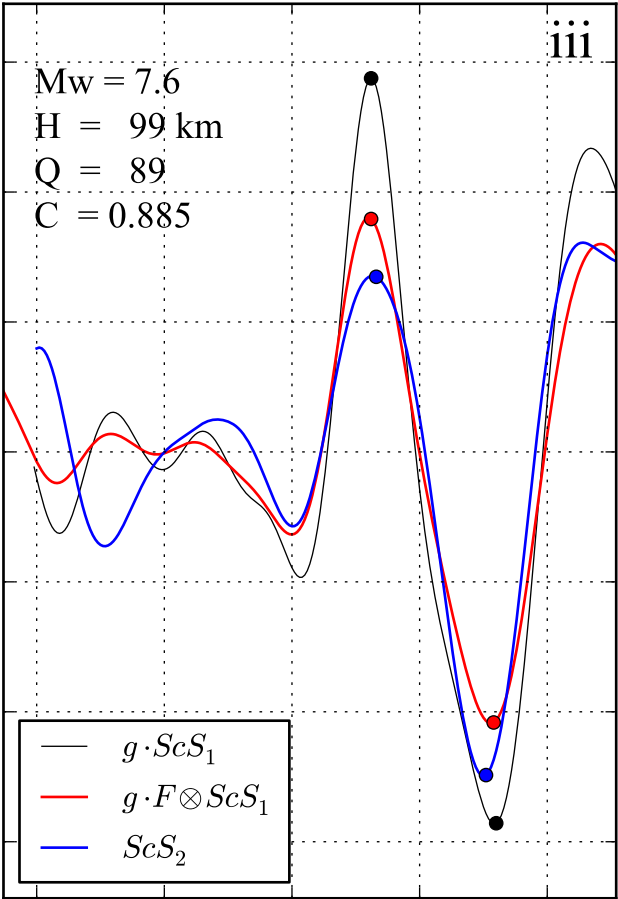

Time [s]

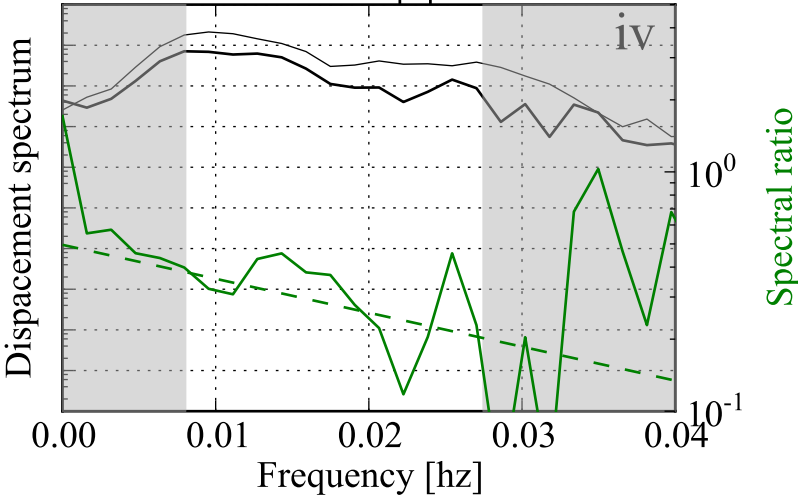

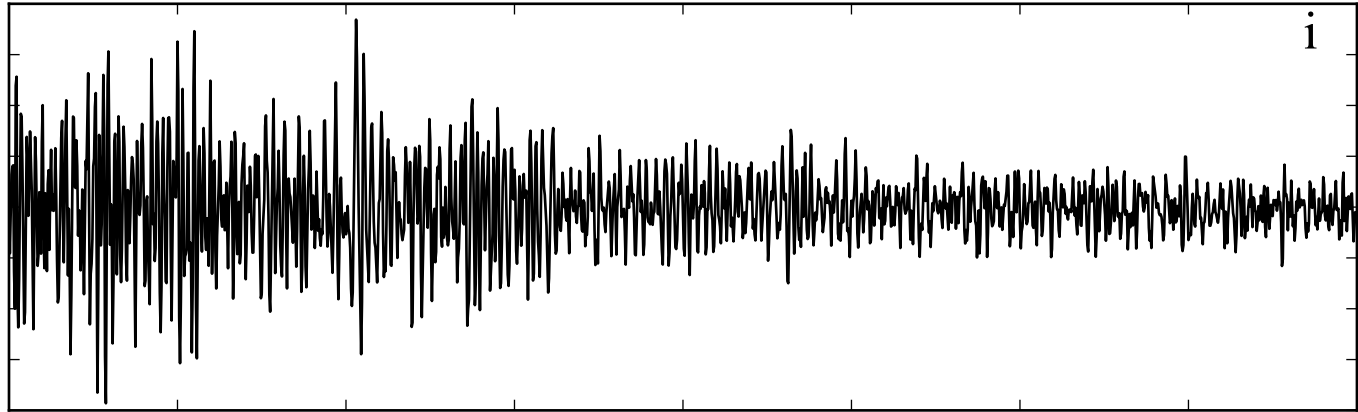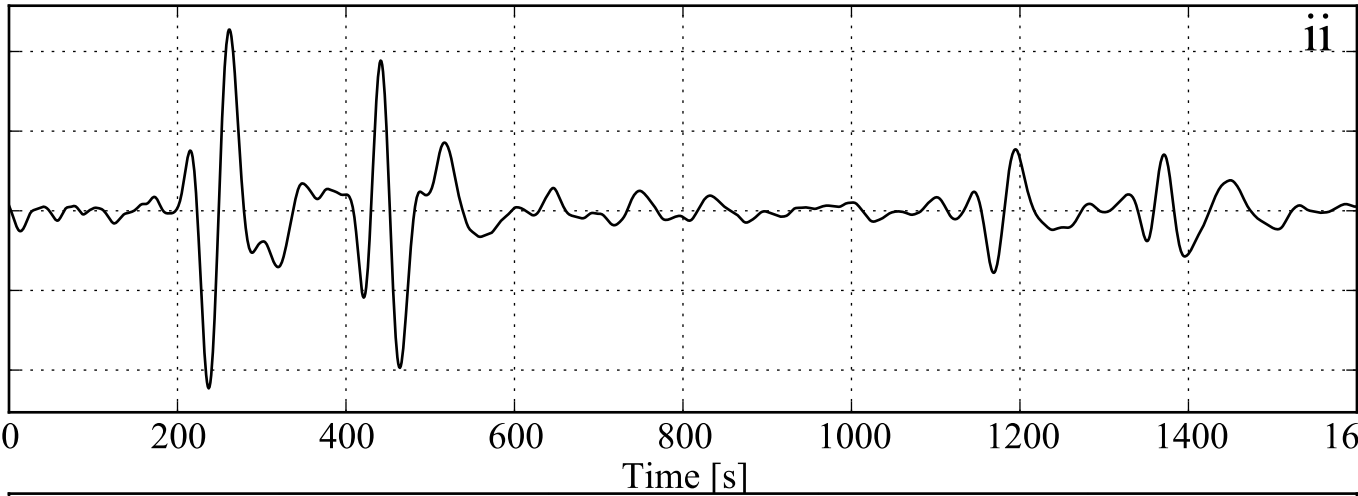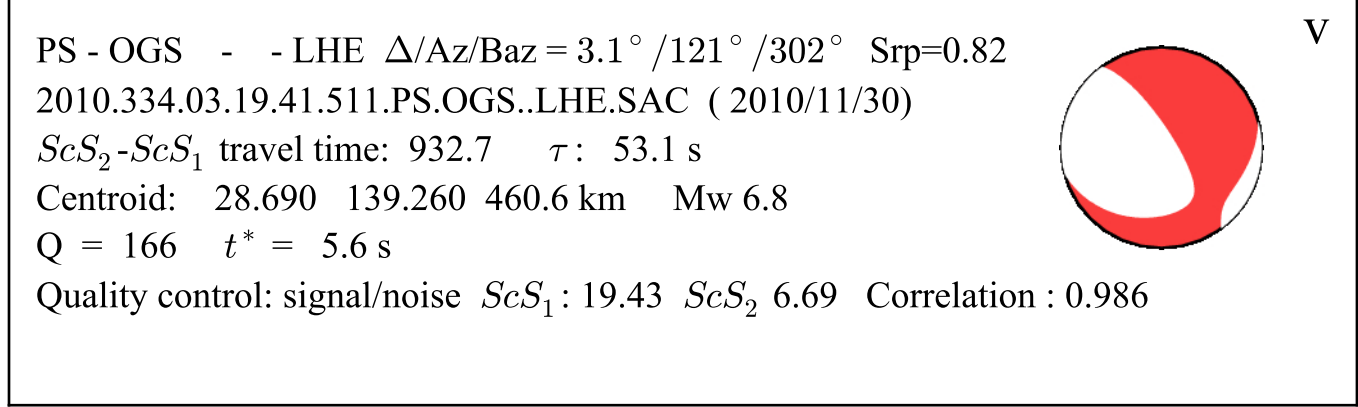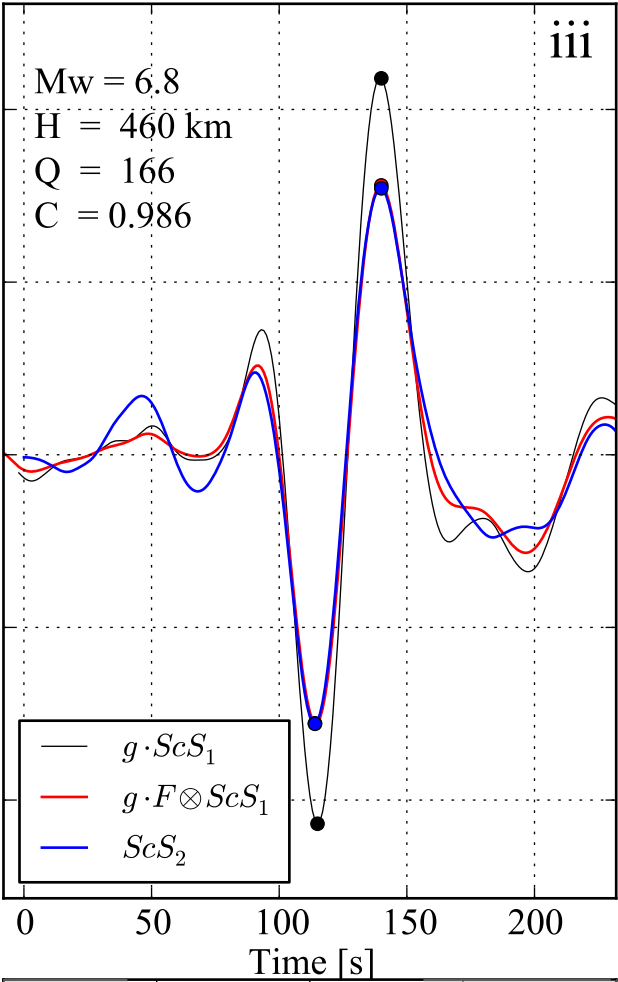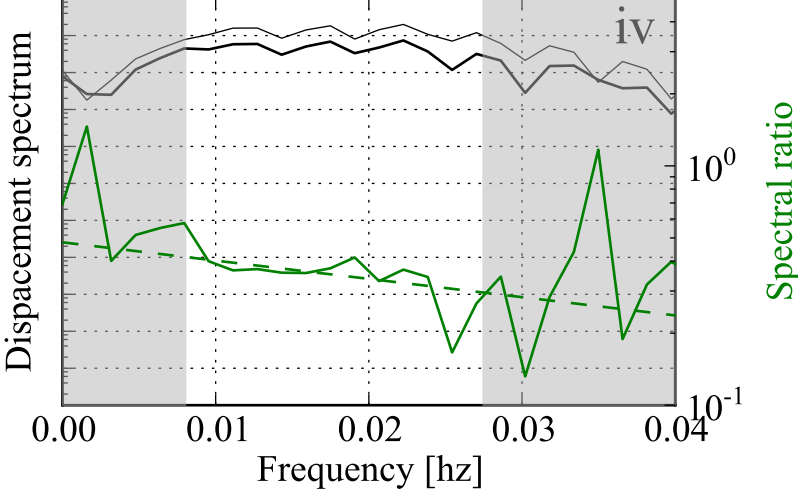

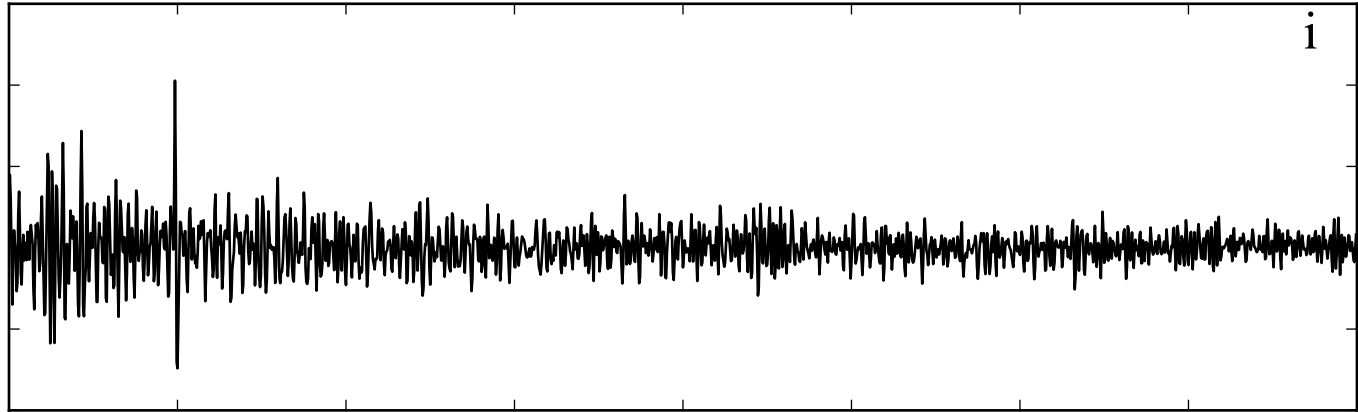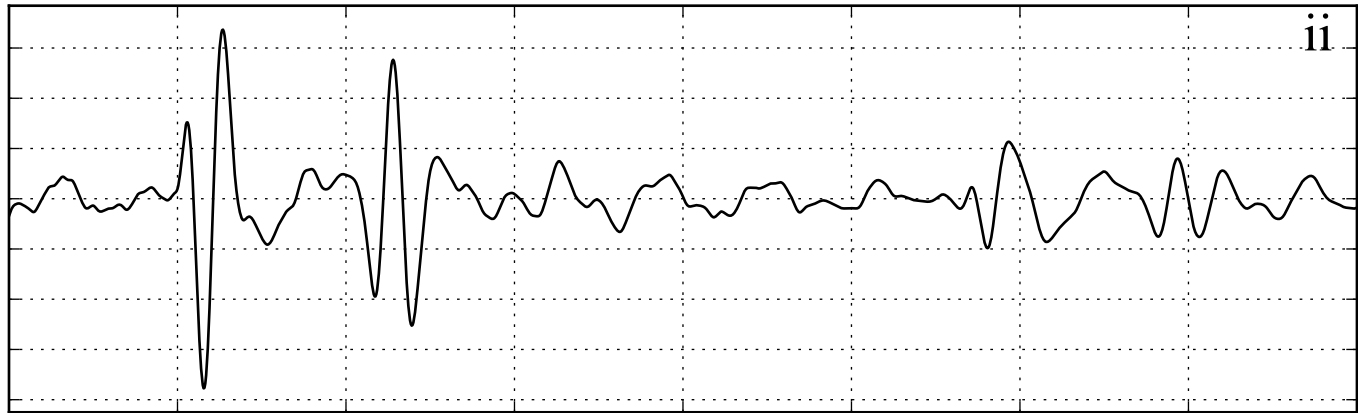

Time [s]

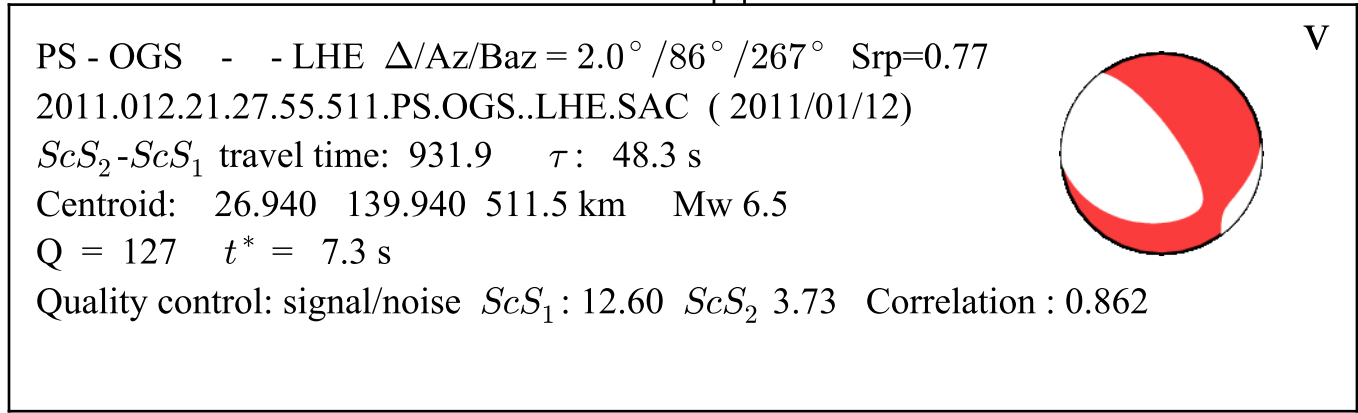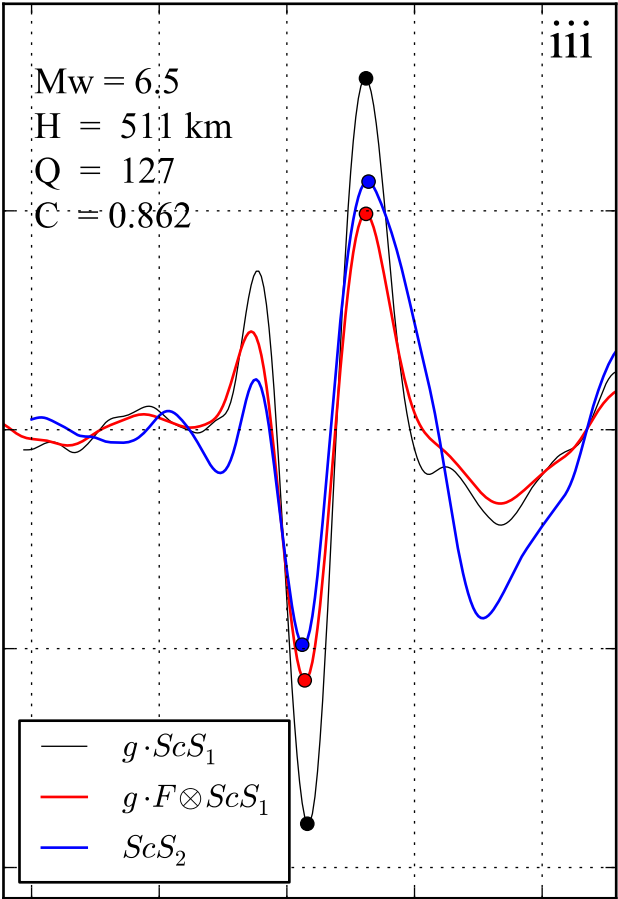

Time [s]

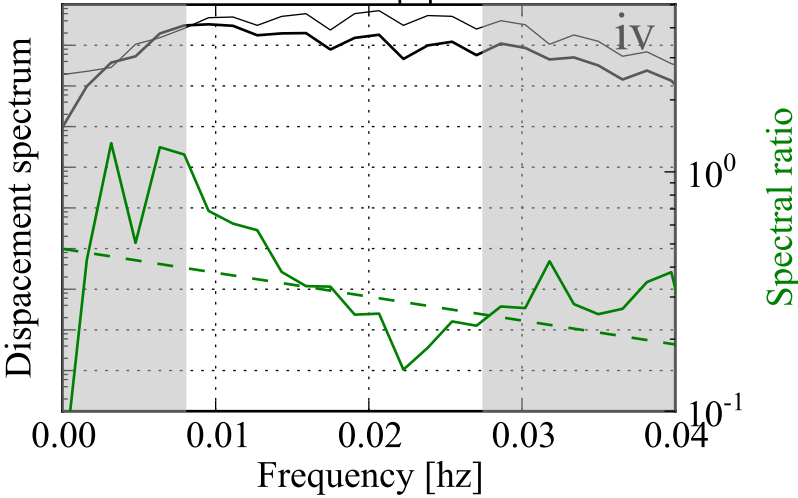



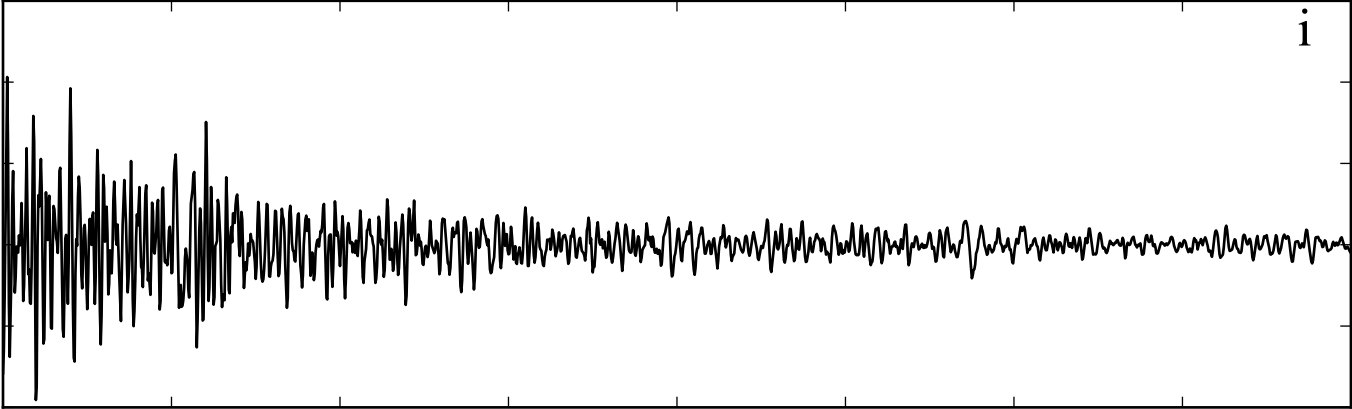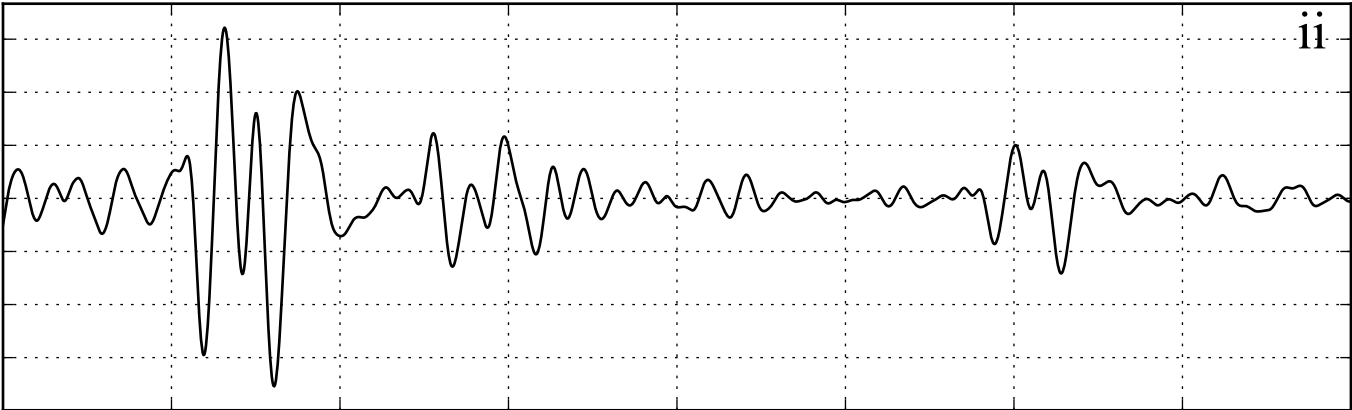

Time [s]

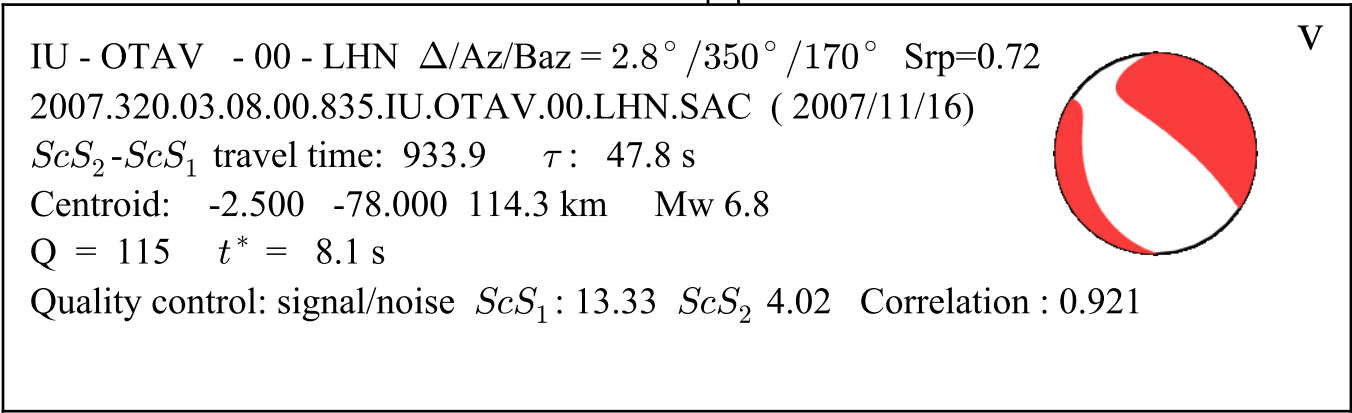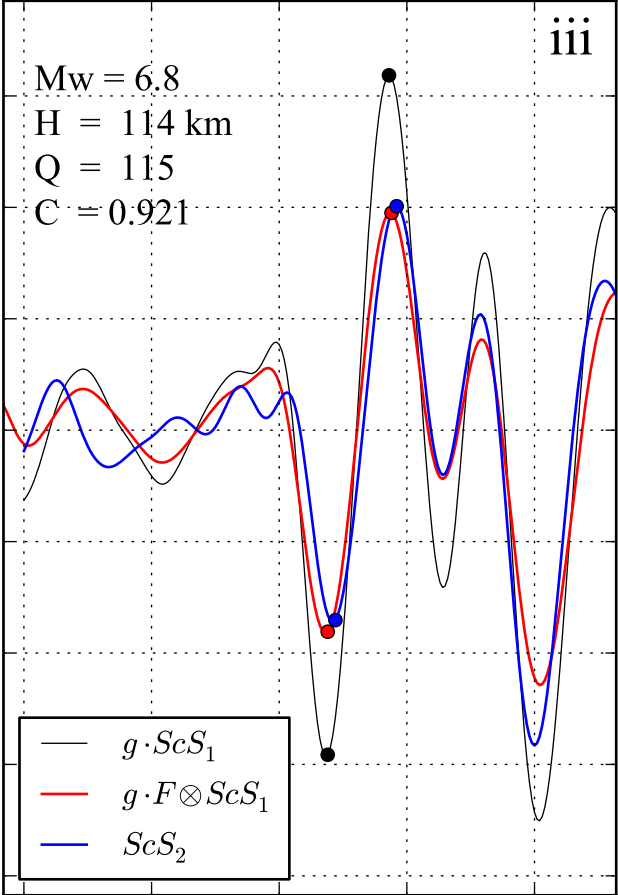

Time [s]

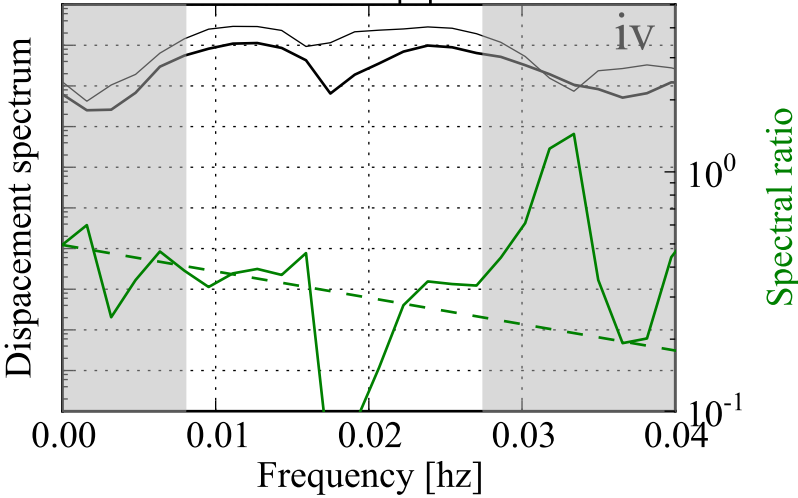

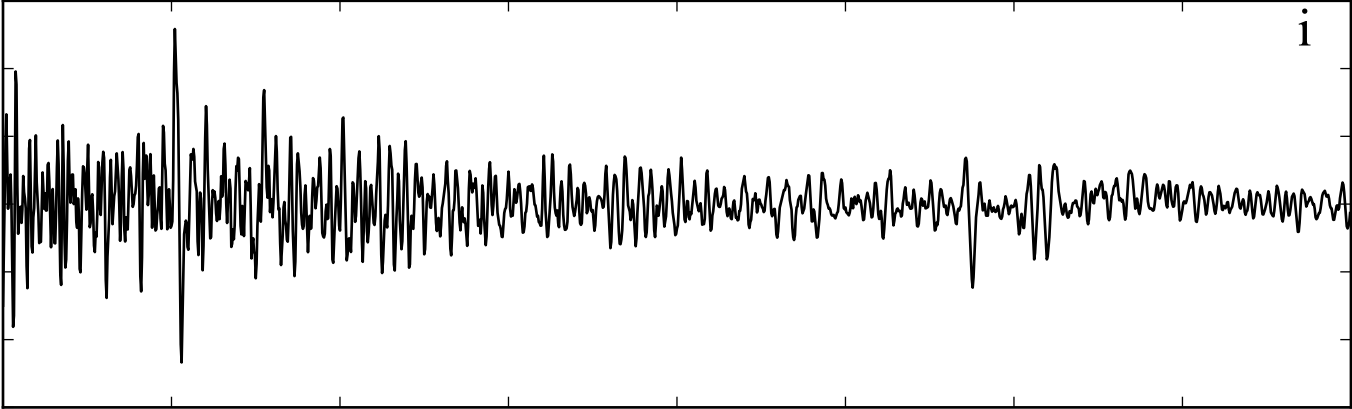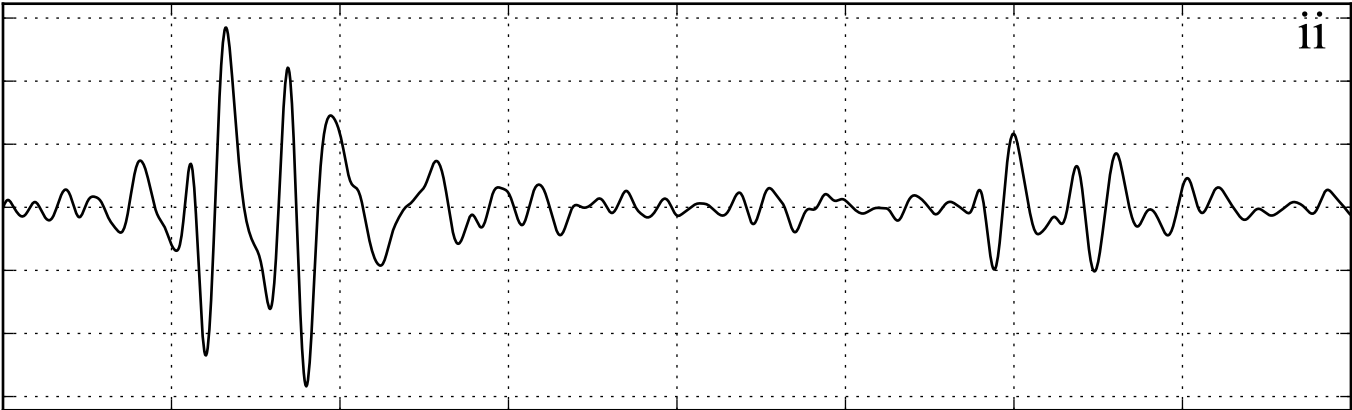

Time [s]

IU - OTAV - 00 - LH1  $\Delta/Az/Baz = 2.0^\circ/331^\circ/151^\circ$   $Srp=0.77$

2010.224.11.49.15.069.IU.OTAV.00.LH1.SAC (2010/08/12)

$ScS_2-ScS_1$  travel time: 934.0  $\tau$ : 53.3 s

Centroid: -1.510 -77.510 197.8 km Mw 7.1

$Q = 352$   $t^* = 2.6$  s

Quality control: signal/noise  $ScS_1$ : 12.60  $ScS_2$  5.29 Correlation : 0.890

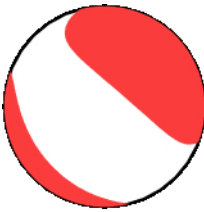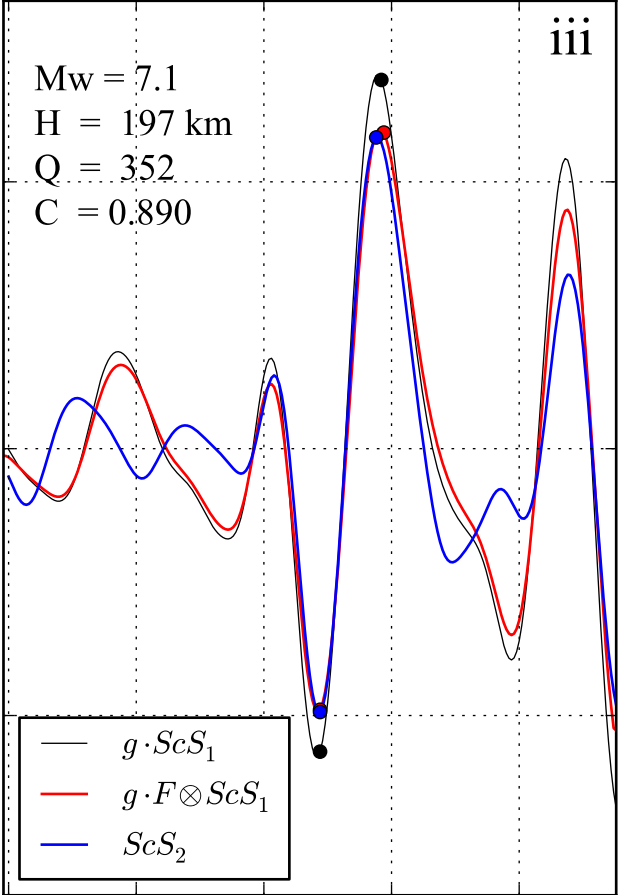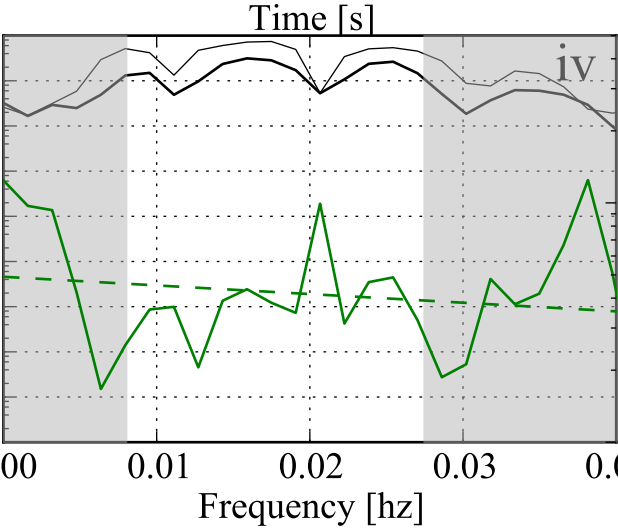

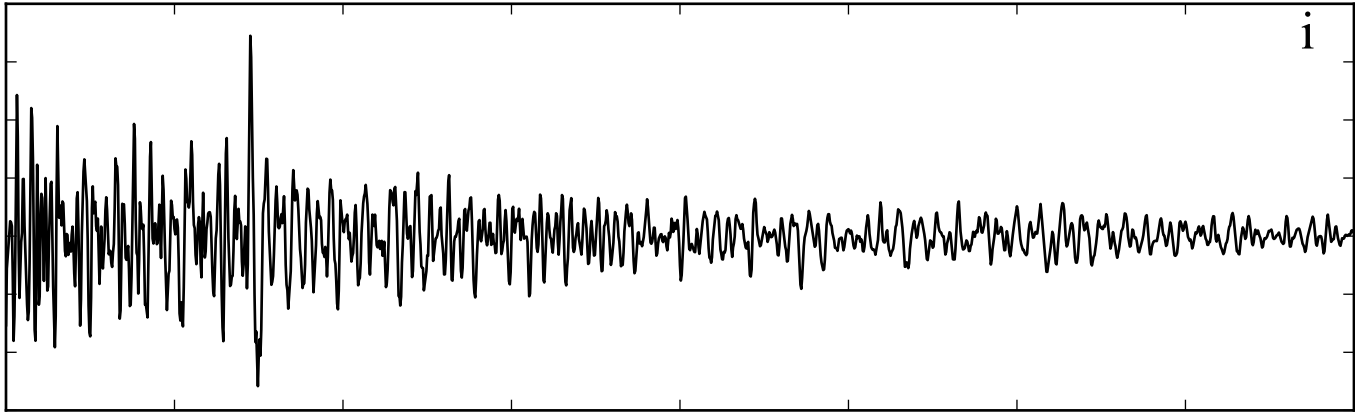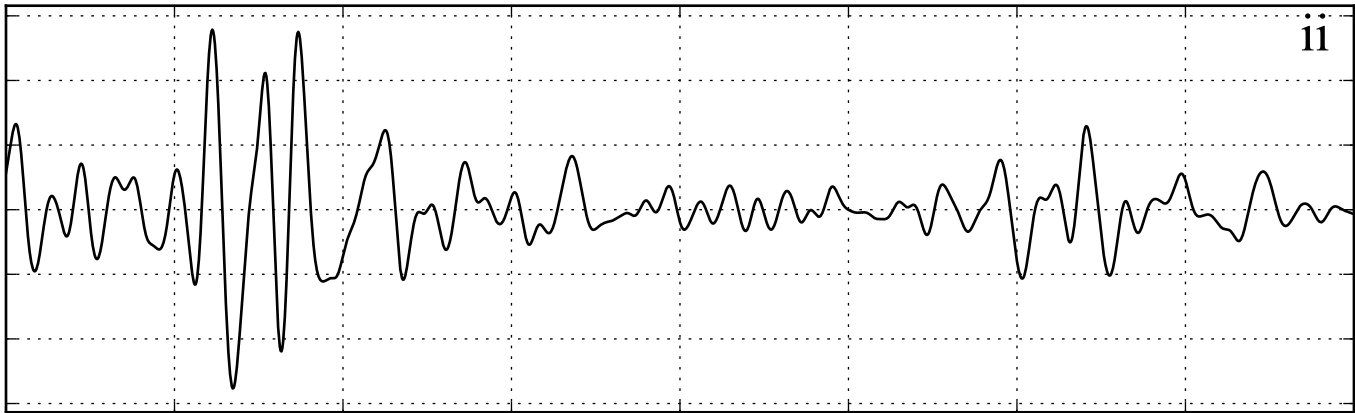

Time [s]

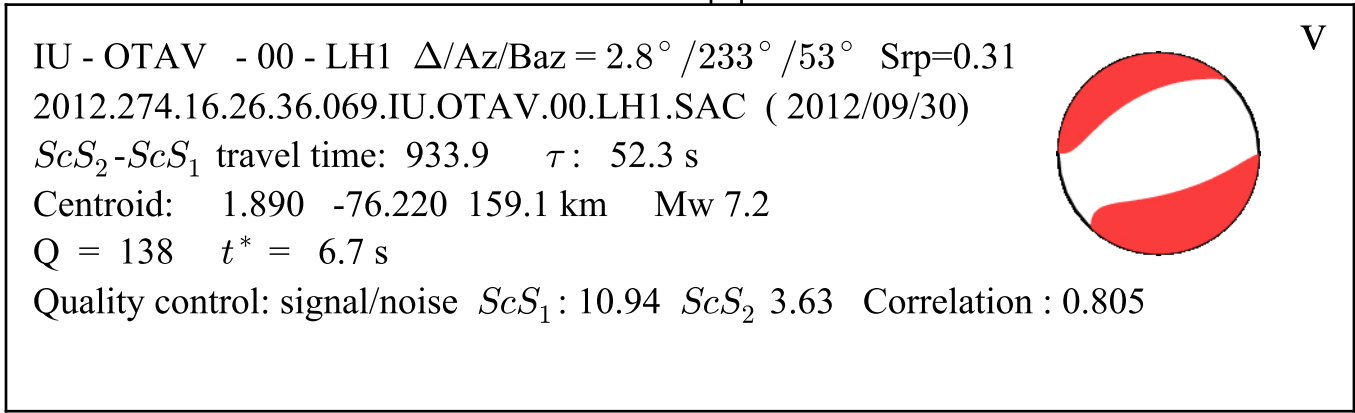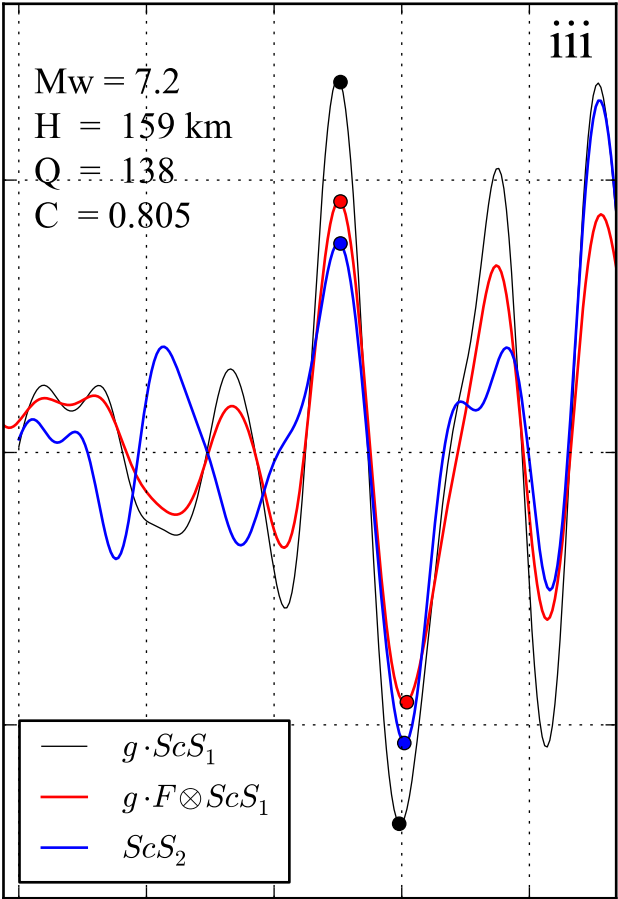

Time [s]

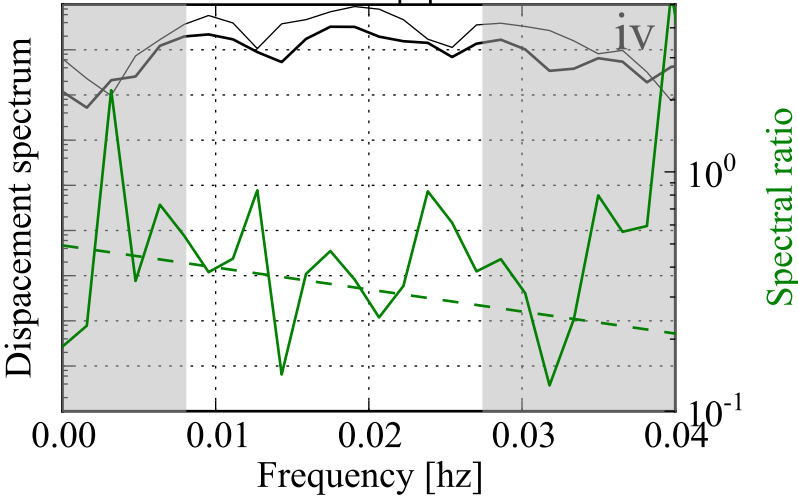

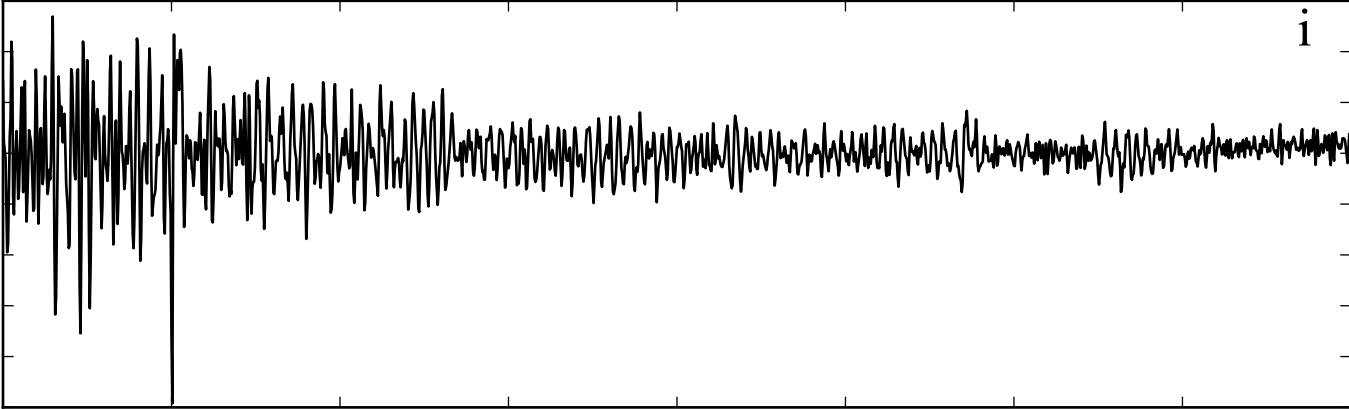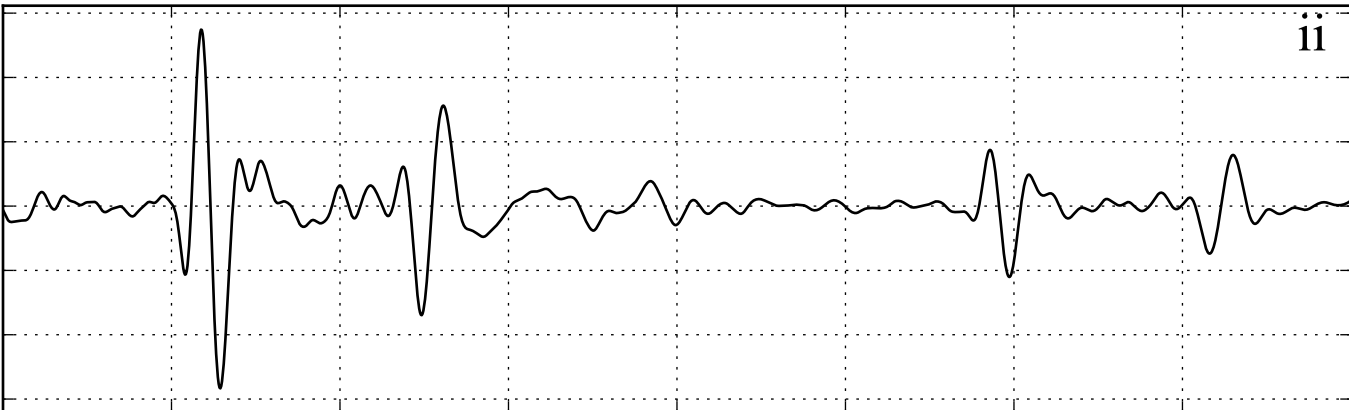

Time [s]

IU - PAB - 00 - LH2  $\Delta/Az/Baz = 2.5^\circ/348^\circ/167^\circ$  Srp=0.78

2010.101.22.03.12.069.IU.PAB.00.LH2.SAC (2010/04/11)

$ScS_2$ - $ScS_1$  travel time: 936.5  $\tau$ : 47.2 s

Centroid: 37.100 -3.690 616.5 km Mw 6.3

$Q = 216$   $t^* = 4.3$  s

Quality control: signal/noise  $ScS_1$ : 28.28  $ScS_2$  10.01 Correlation : 0.943

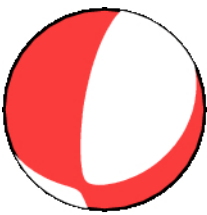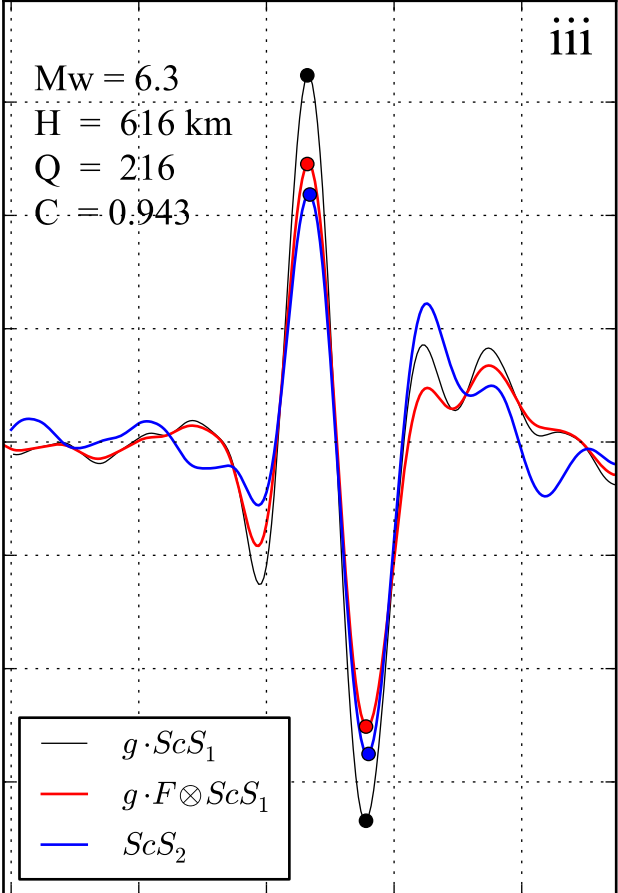

Time [s]

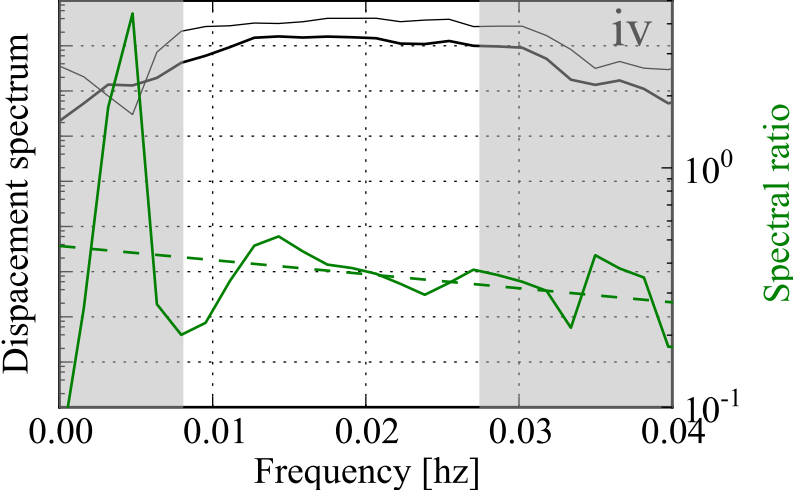

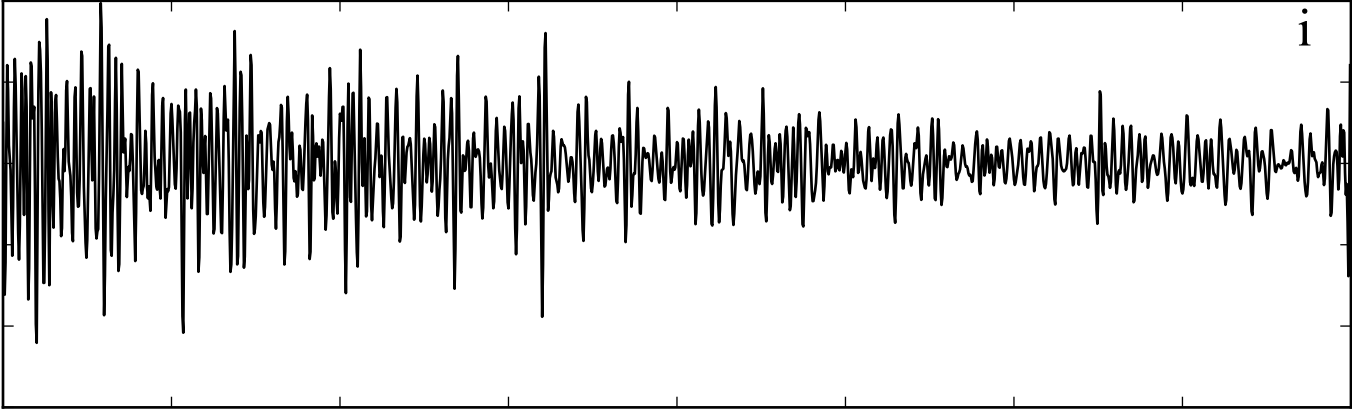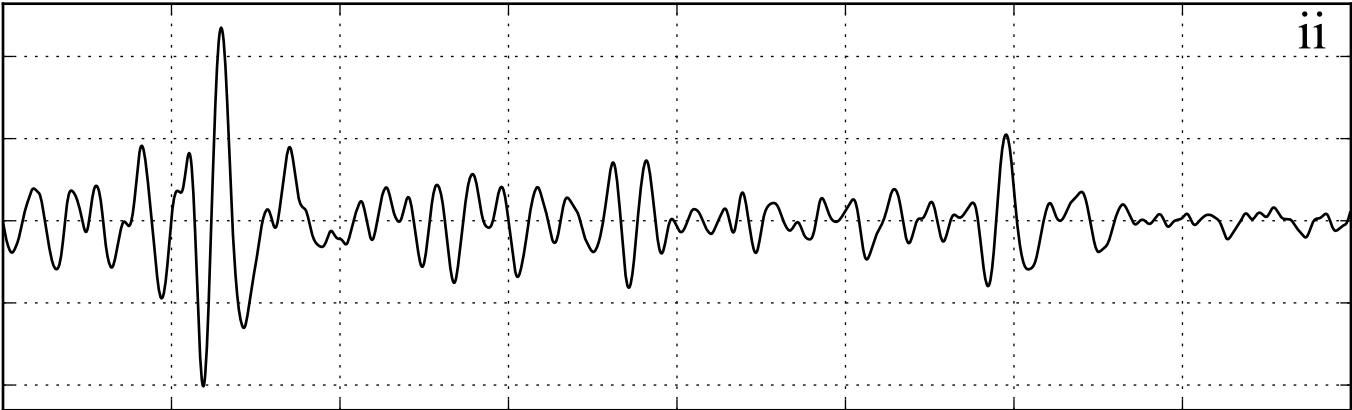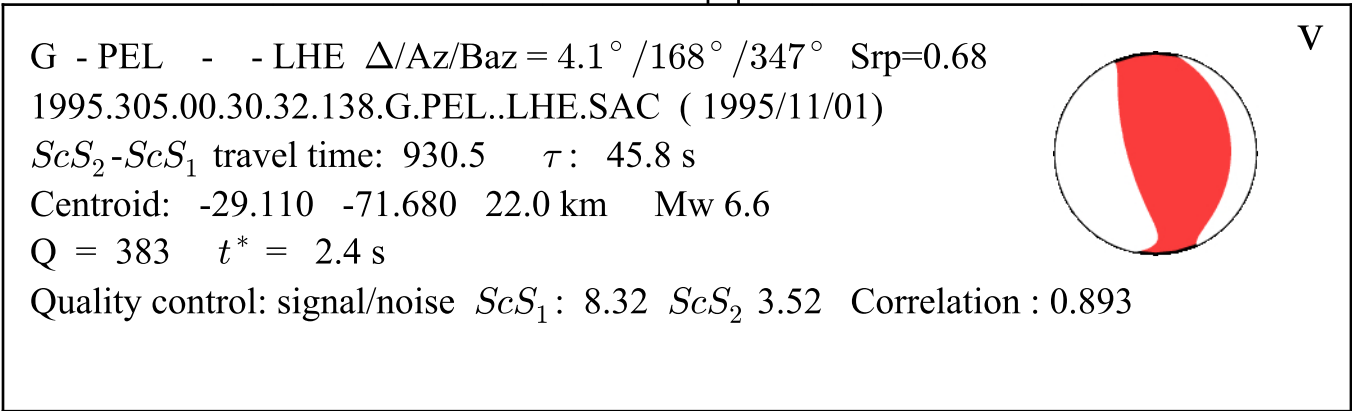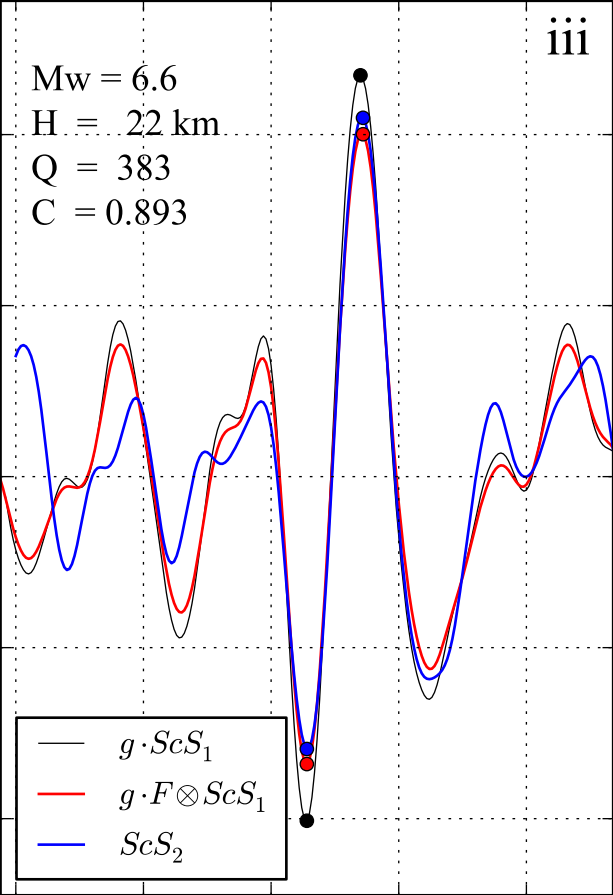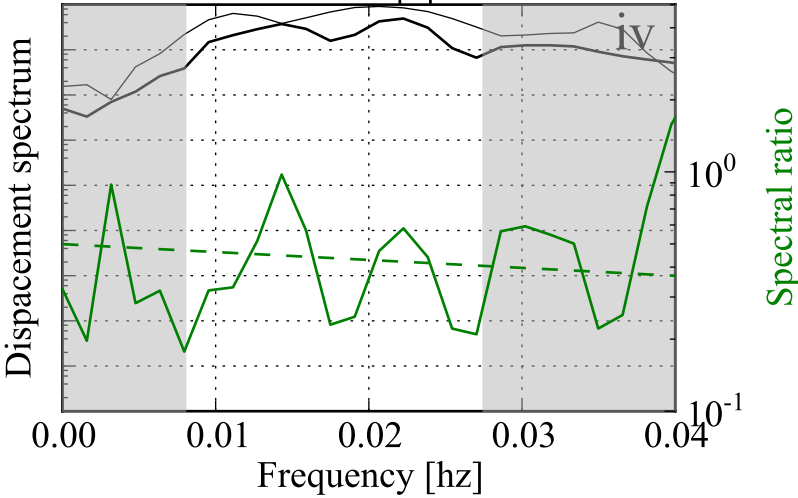

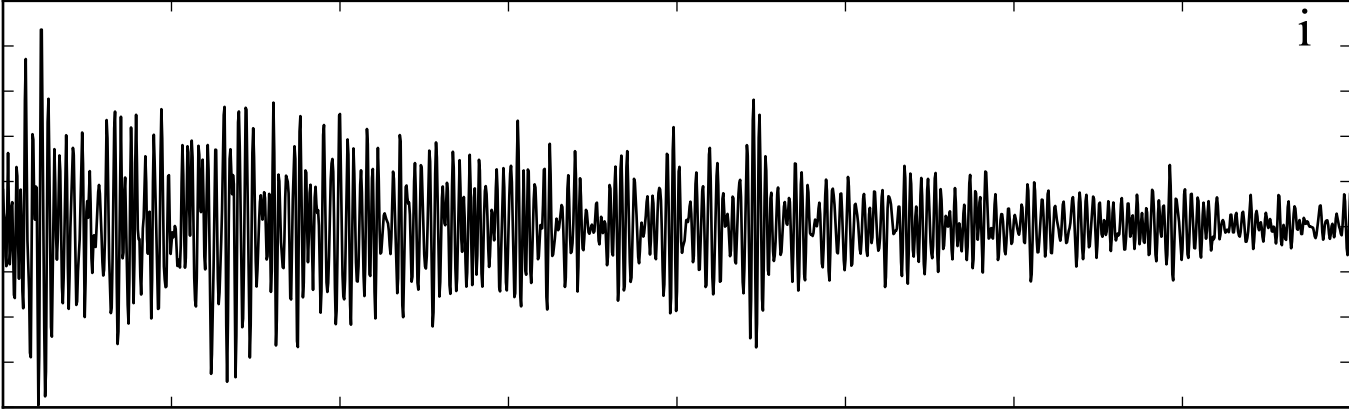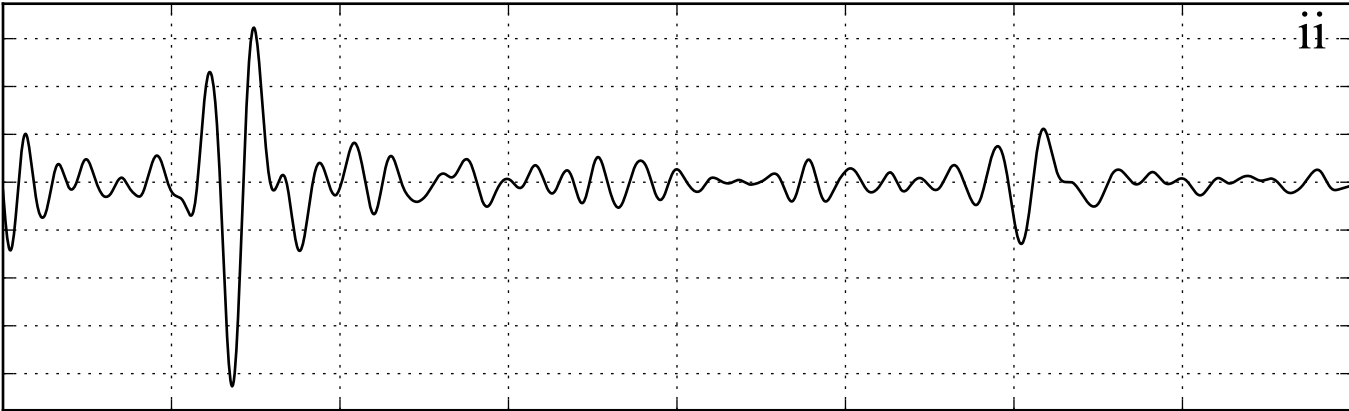

Time [s]

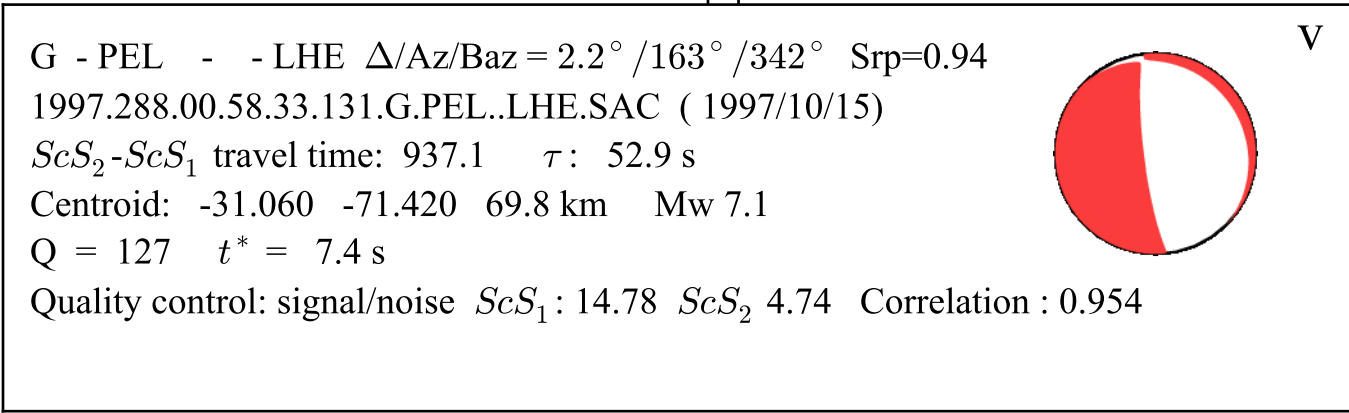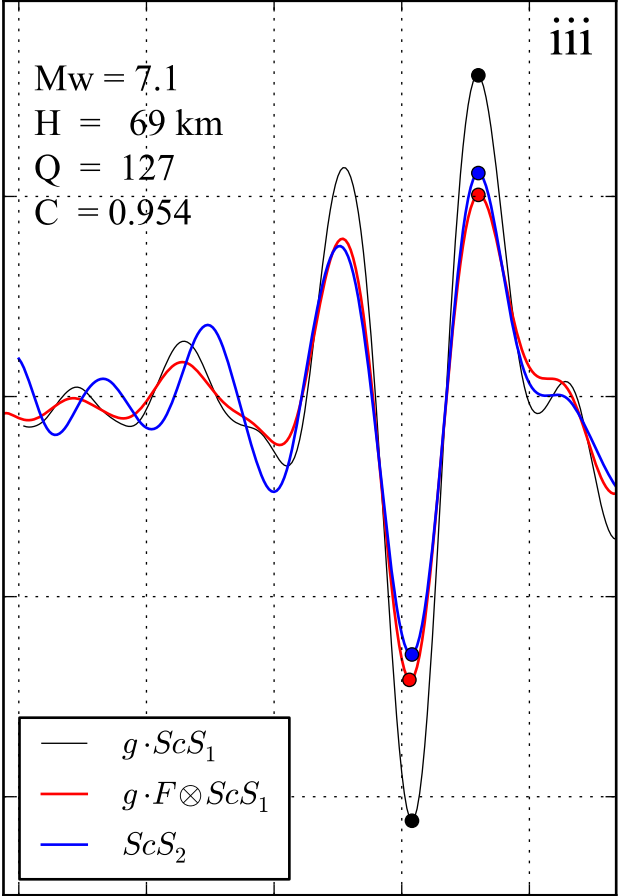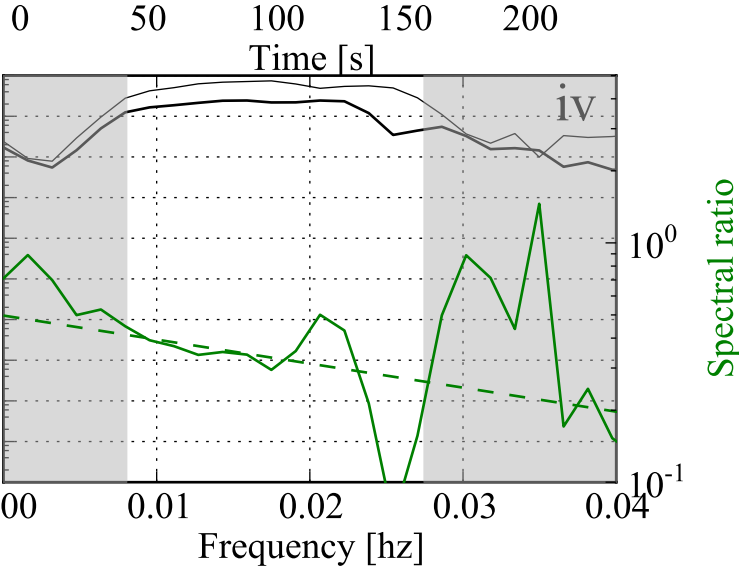

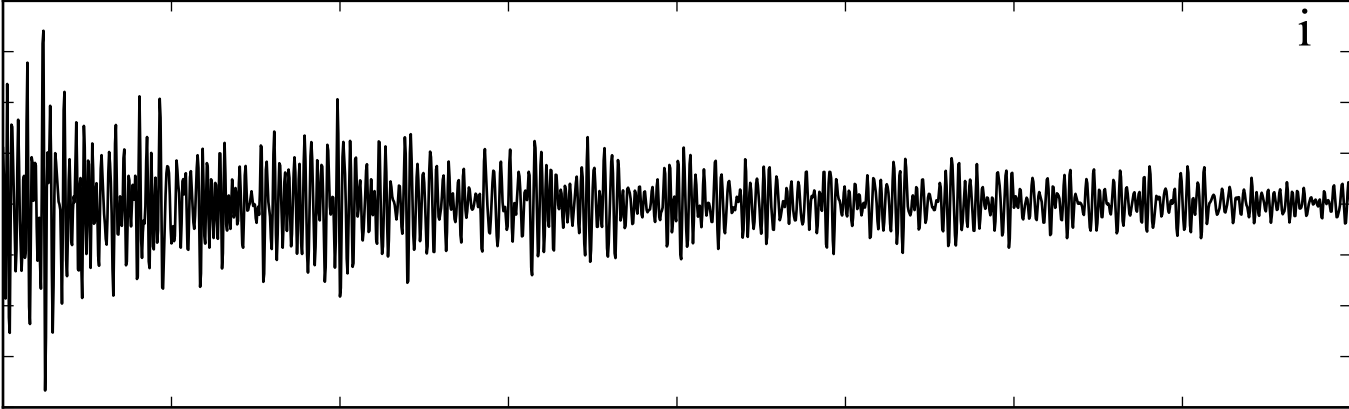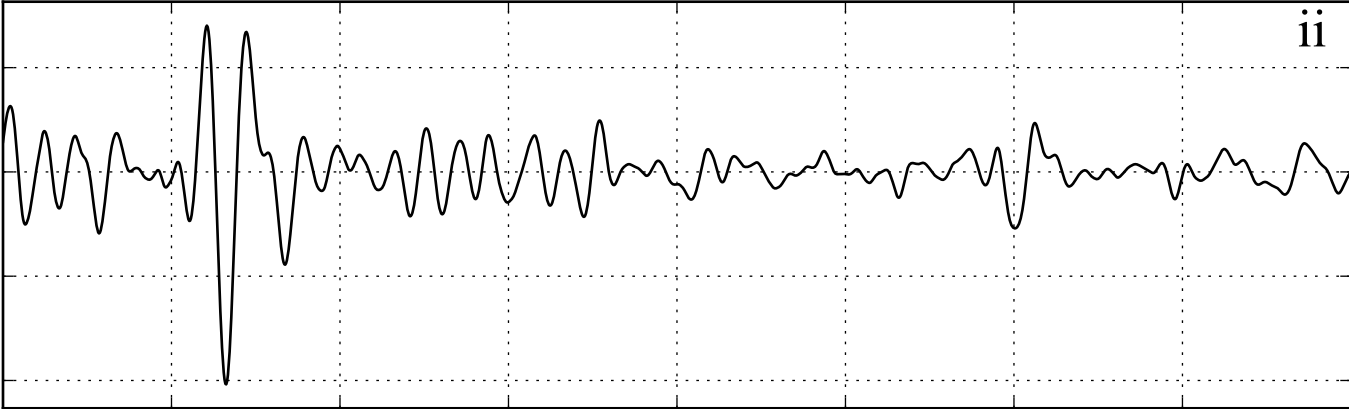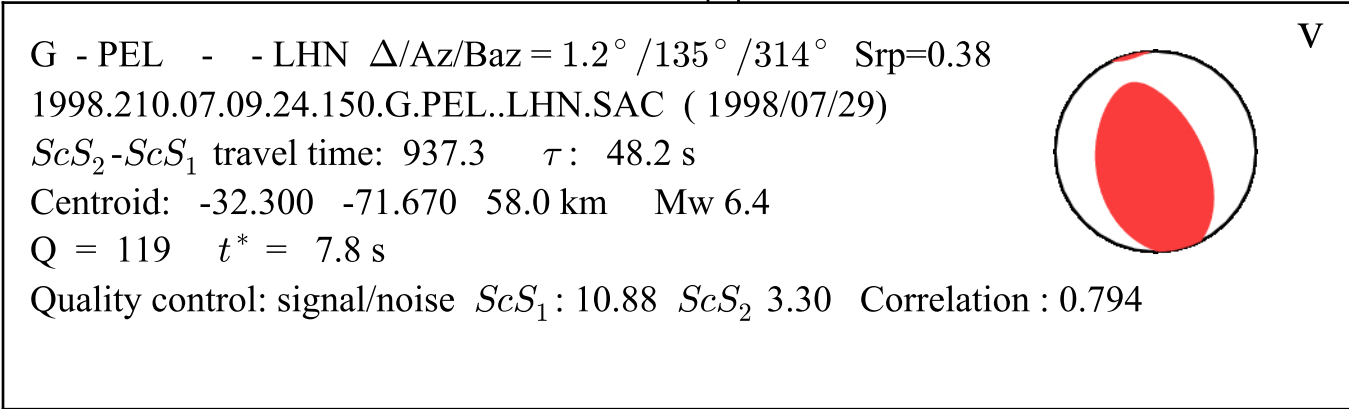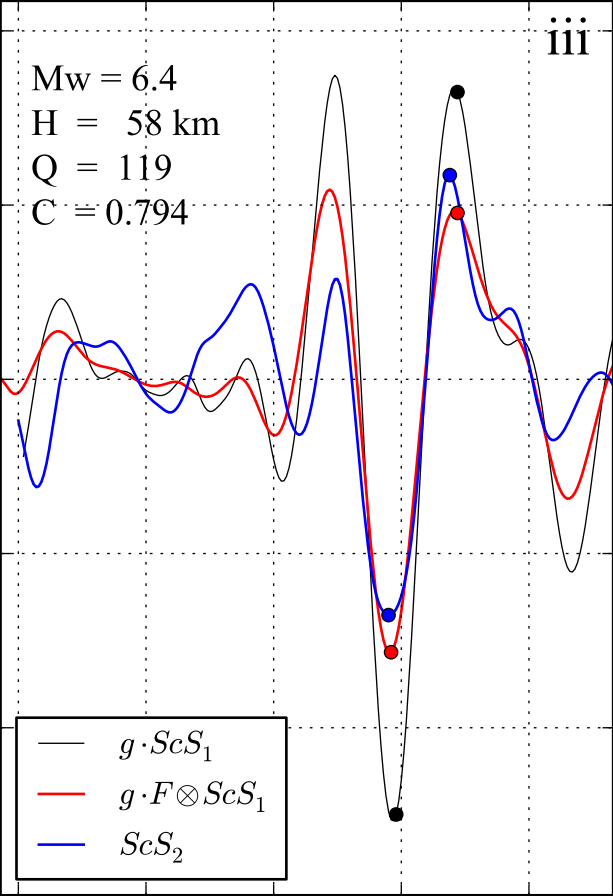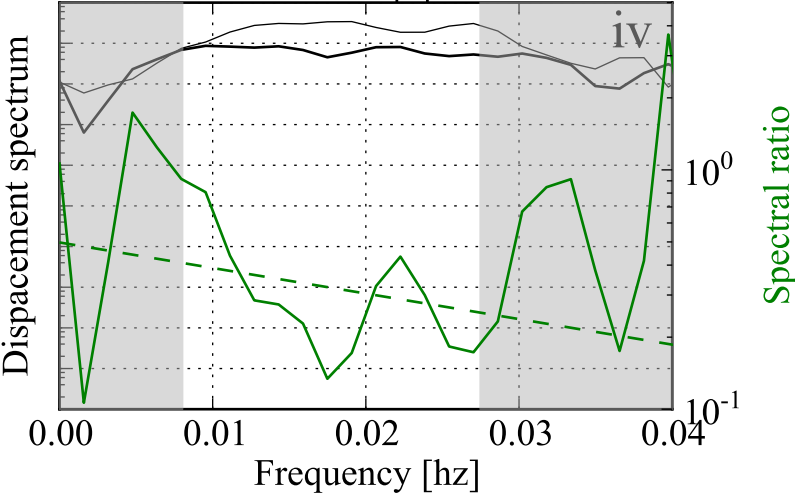

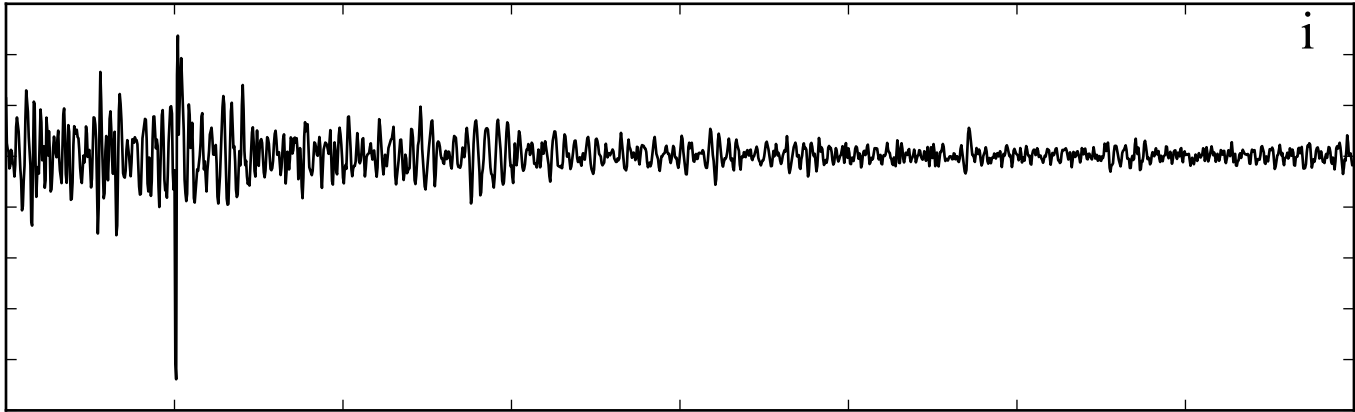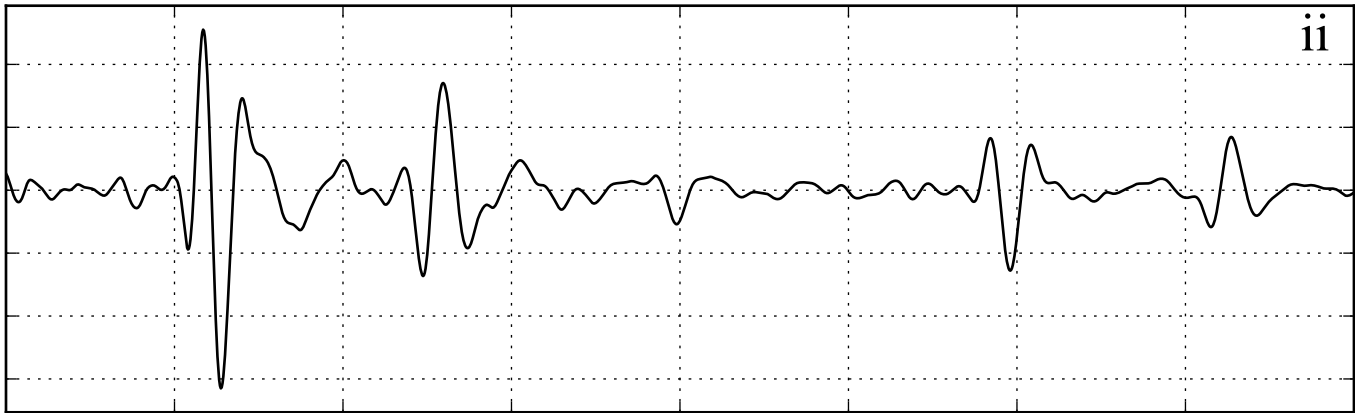

Time [s]

PM - PESTR - - LHE  $\Delta/Az/Baz = 3.6^\circ/300^\circ/118^\circ$   $Srp=0.78$   
2010.101.22.03.12.150.PM.PESTR..LHE.SAC ( 2010/04/11)  
 $ScS_2$ - $ScS_1$  travel time: 935.1  $\tau$ : 46.7 s  
Centroid: 37.100 -3.690 616.5 km Mw 6.3  
 $Q = 255$   $t^* = 3.7$  s  
Quality control: signal/noise  $ScS_1$ : 17.04  $ScS_2$  6.29 Correlation : 0.959



v

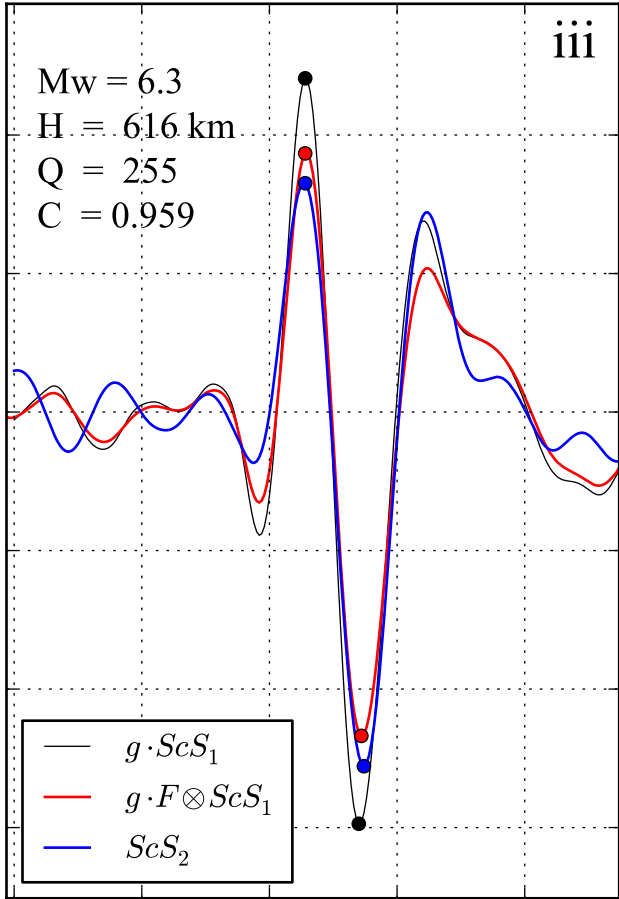

Time [s]

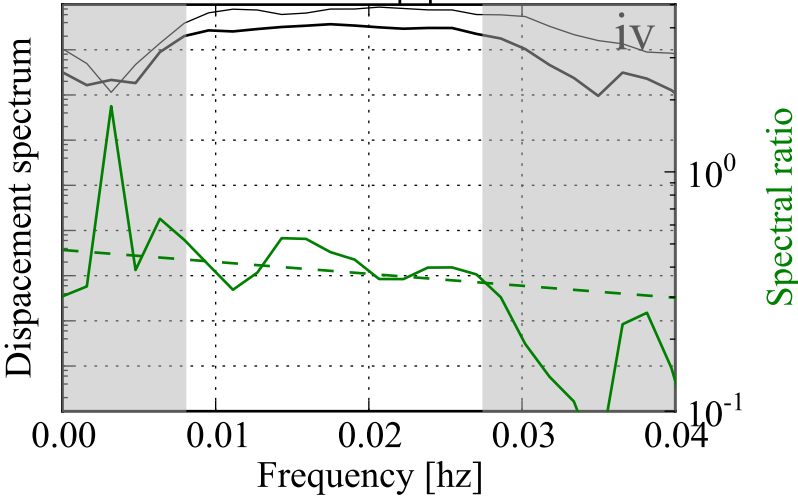



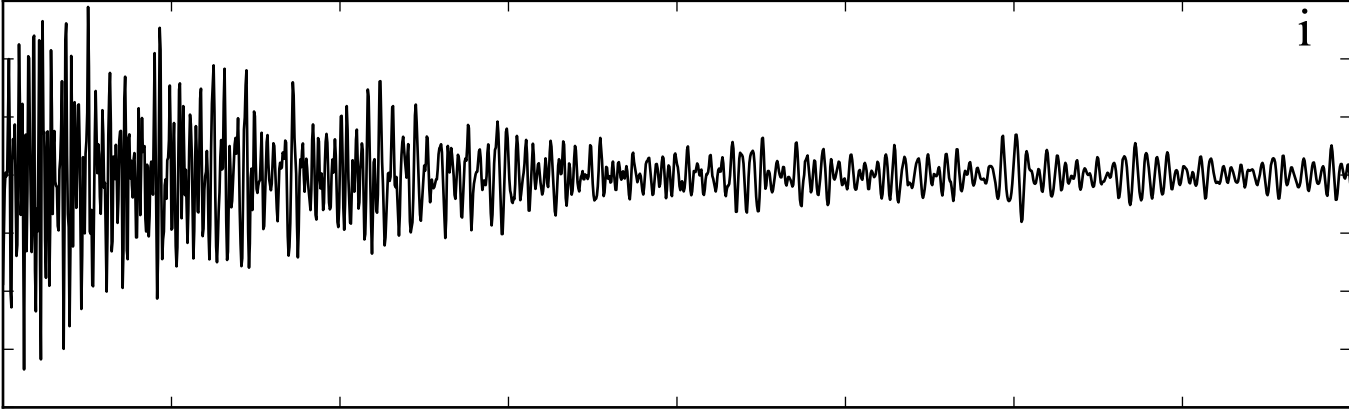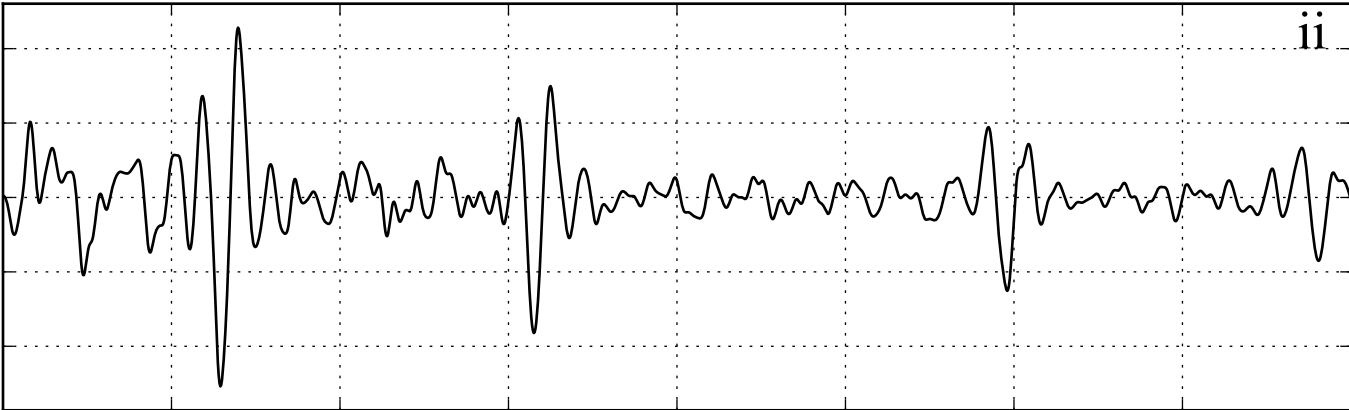

Time [s]

IU - PET - 00 - LHE  $\Delta/Az/Baz = 1.2^\circ/291^\circ/109^\circ$   $Srp=0.75$

2001.281.18.09.26.386.IU.PET.00.LHE.SAC (2001/10/08)

$ScS_2$ - $ScS_1$  travel time: 932.7  $\tau$ : 42.2 s

Centroid: 52.590 160.560 28.0 km Mw 6.4

$Q = 369$   $t^* = 2.5$  s

Quality control: signal/noise  $ScS_1$ : 10.51  $ScS_2$  4.26 Correlation : 0.880

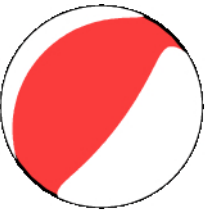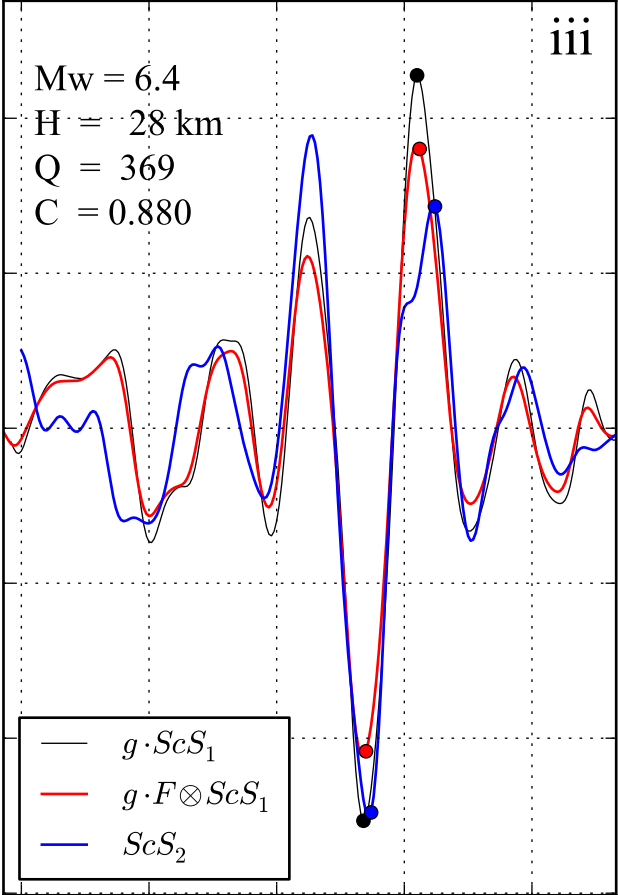

Time [s]

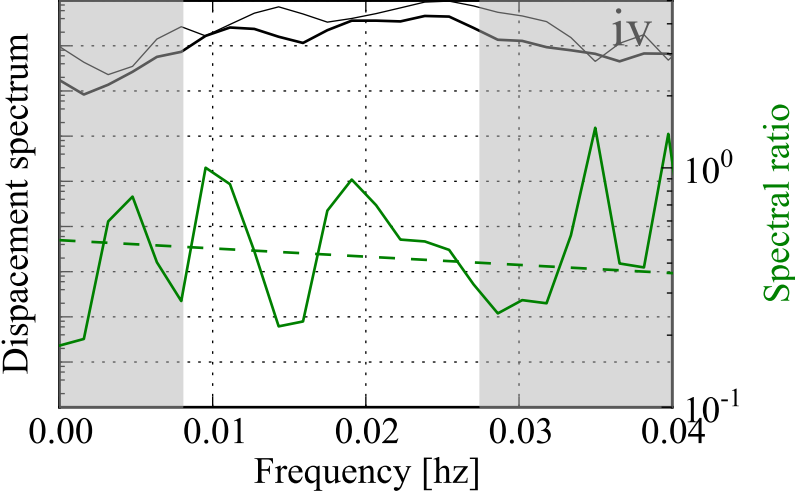

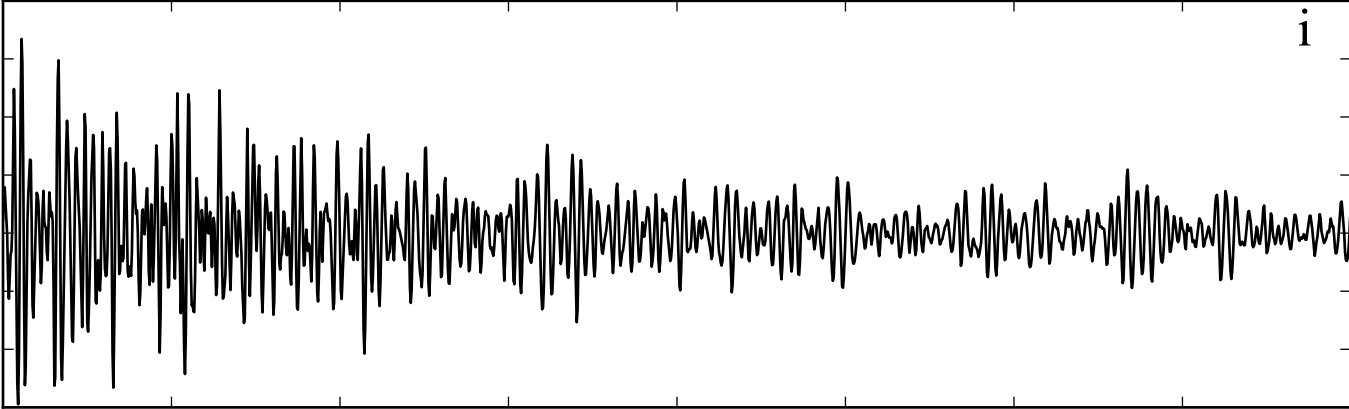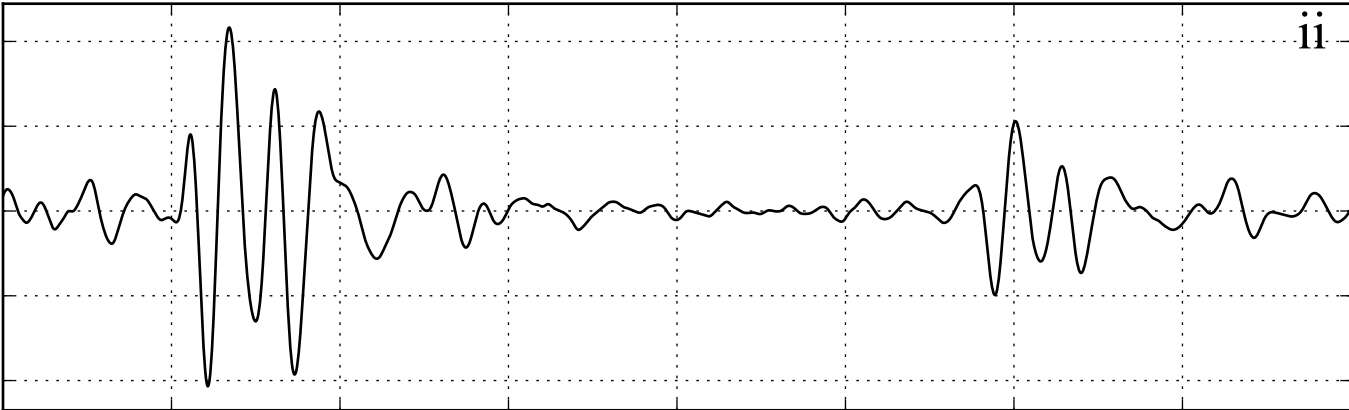

Time [s]

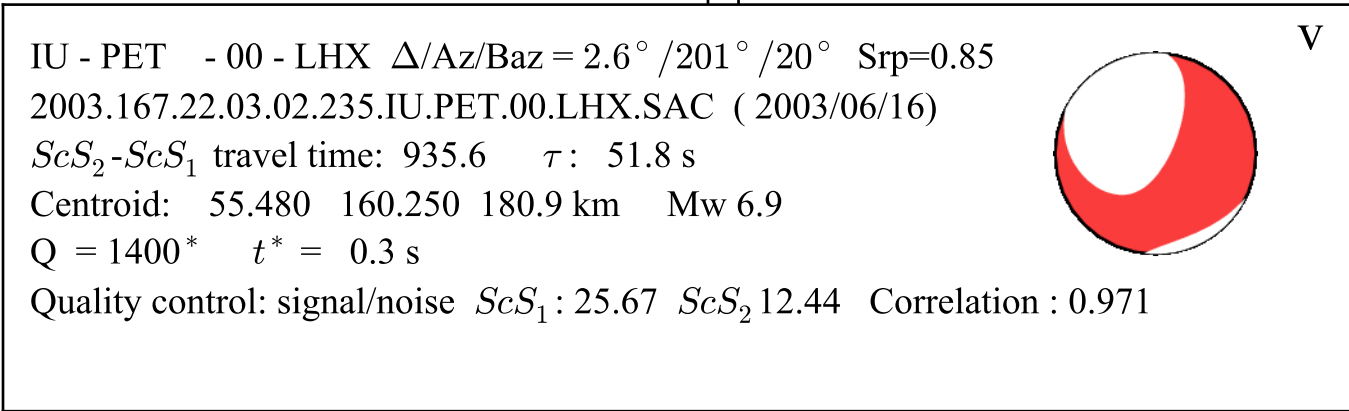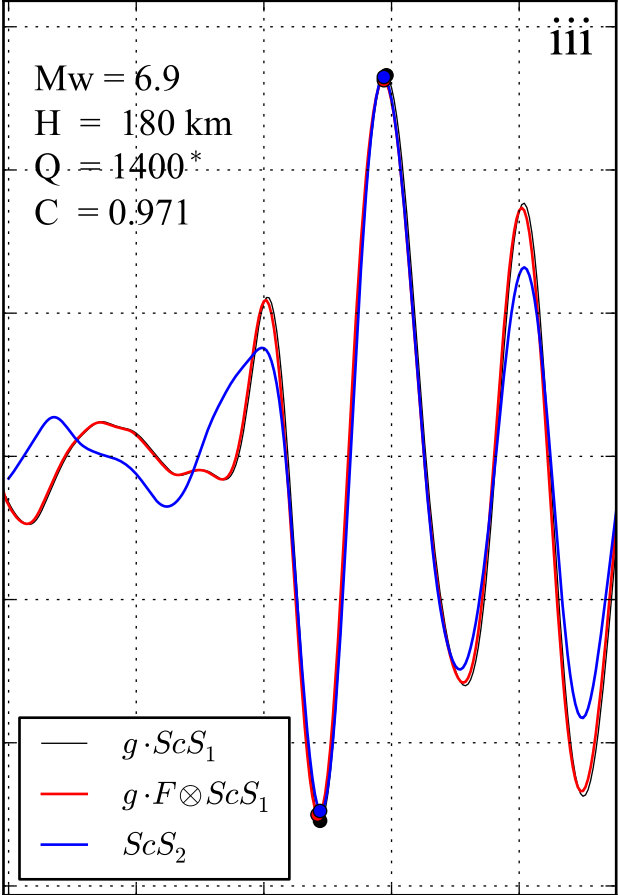

Time [s]

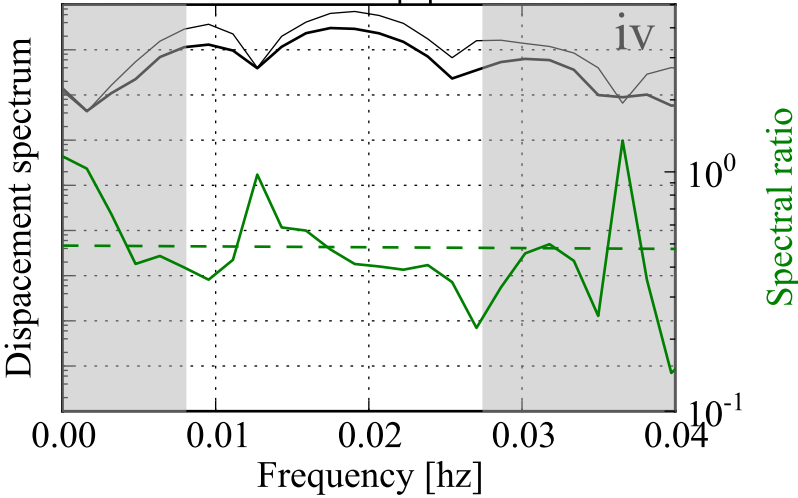

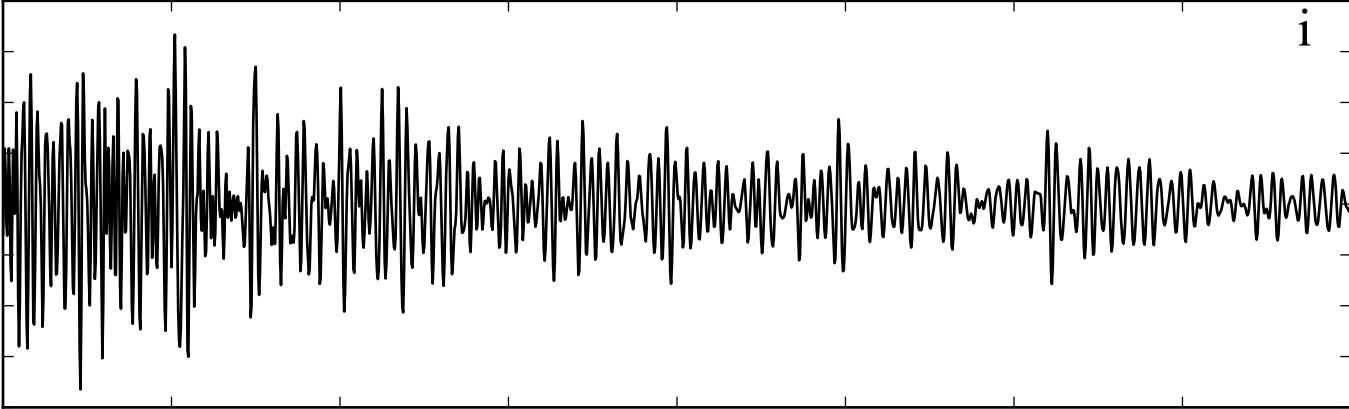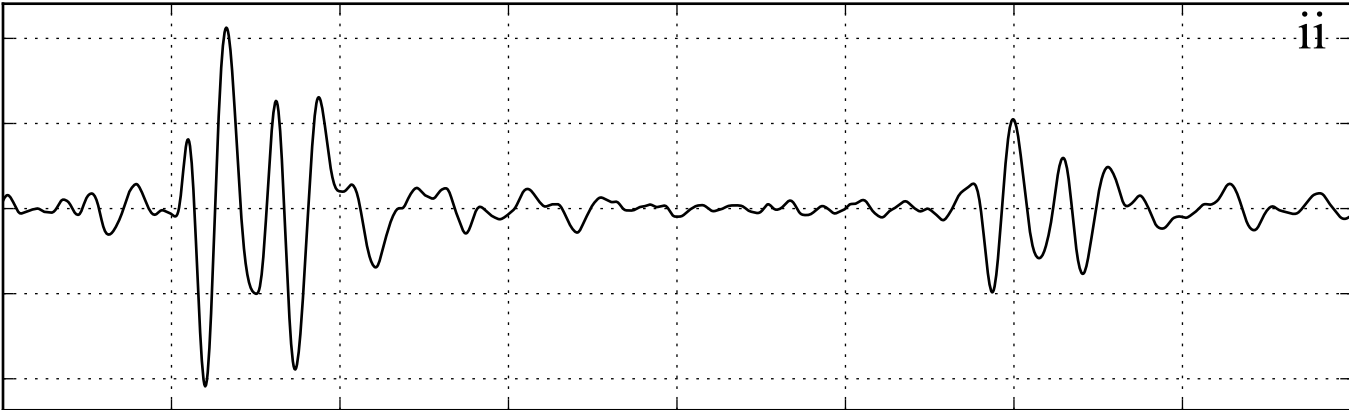

Time [s]

IU - PET - 00 - LHX  $\Delta/Az/Baz = 2.9^\circ/200^\circ/18^\circ$  Srp=0.95

2004.162.15.14.57.235.IU.PET.00.LHX.SAC ( 2004/06/10)

$ScS_2$ - $ScS_1$  travel time: 935.5  $\tau$ : 52.5 s

Centroid: 55.790 160.320 190.1 km Mw 6.8

$Q = 1400^*$   $t^* = 0.3$  s

Quality control: signal/noise  $ScS_1$ : 30.52  $ScS_2$  14.73 Correlation : 0.972

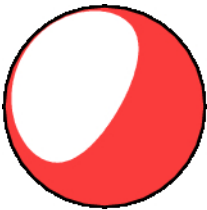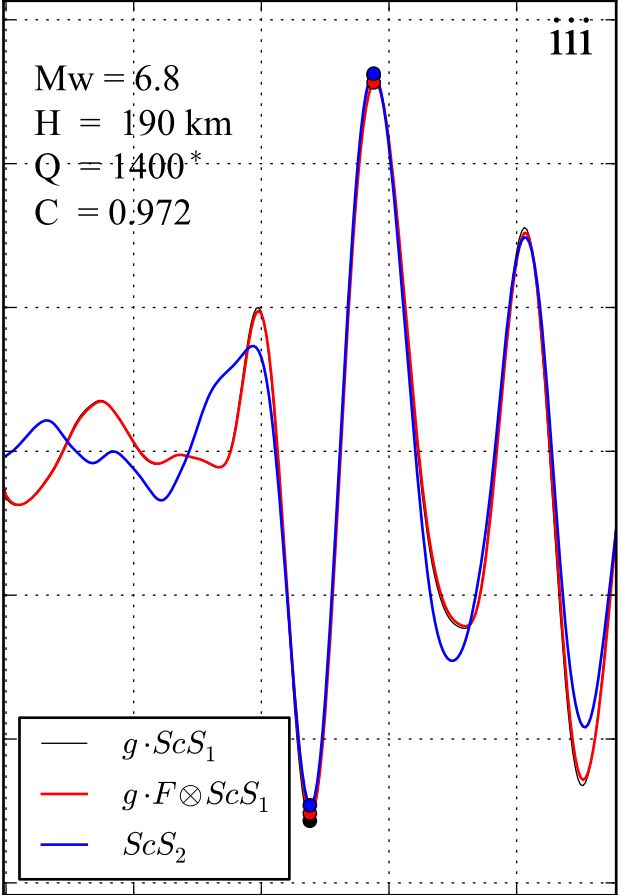

Time [s]

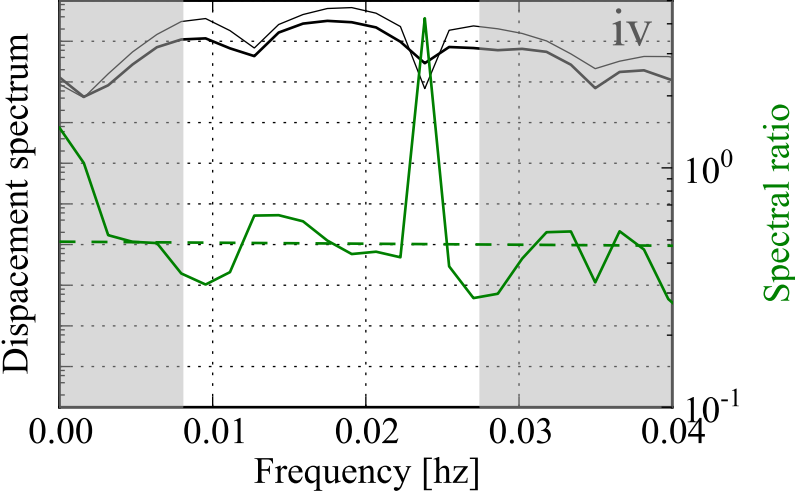

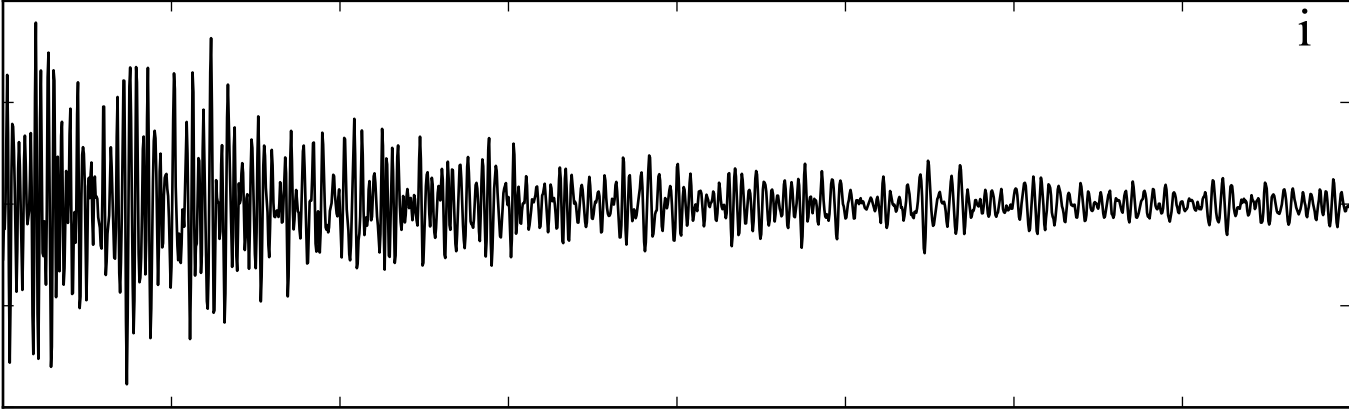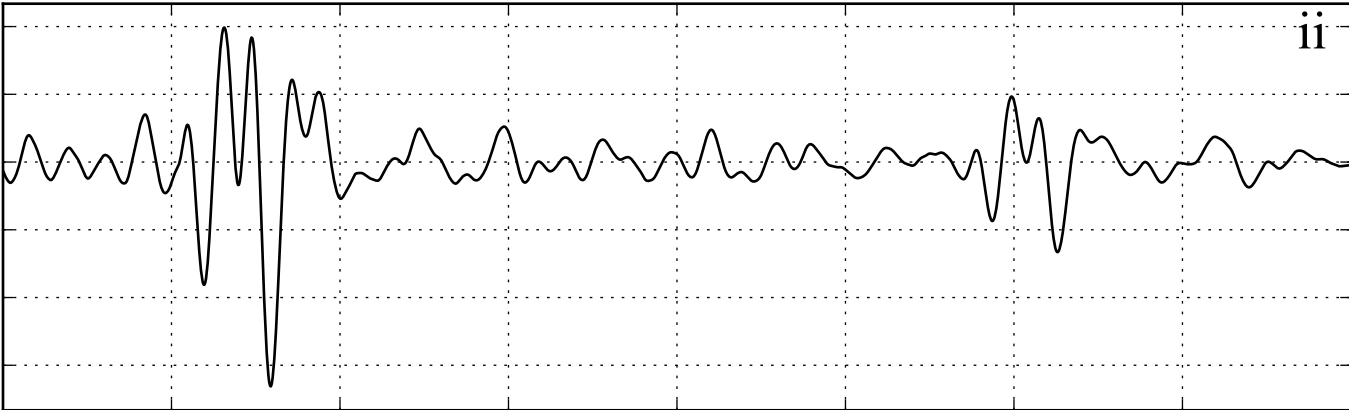

Time [s]

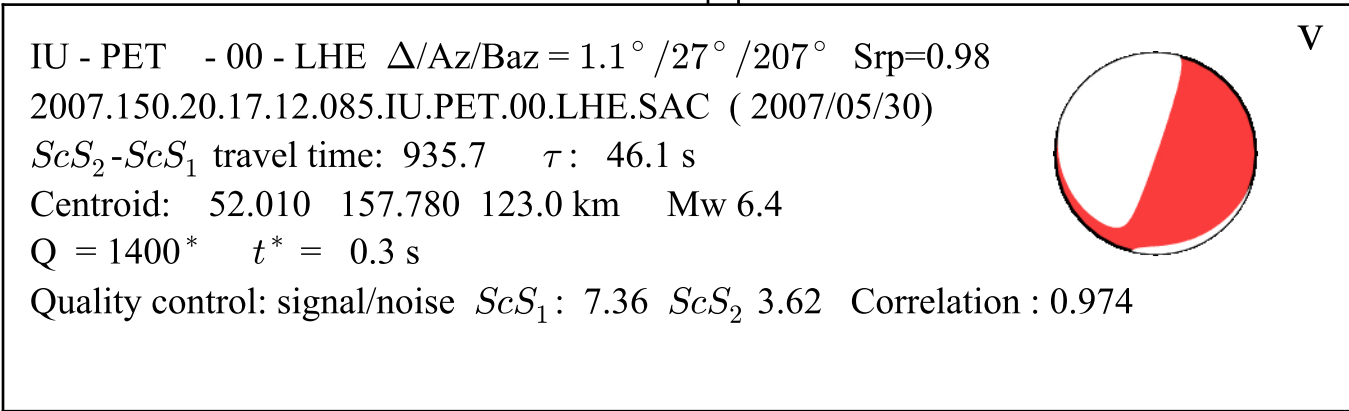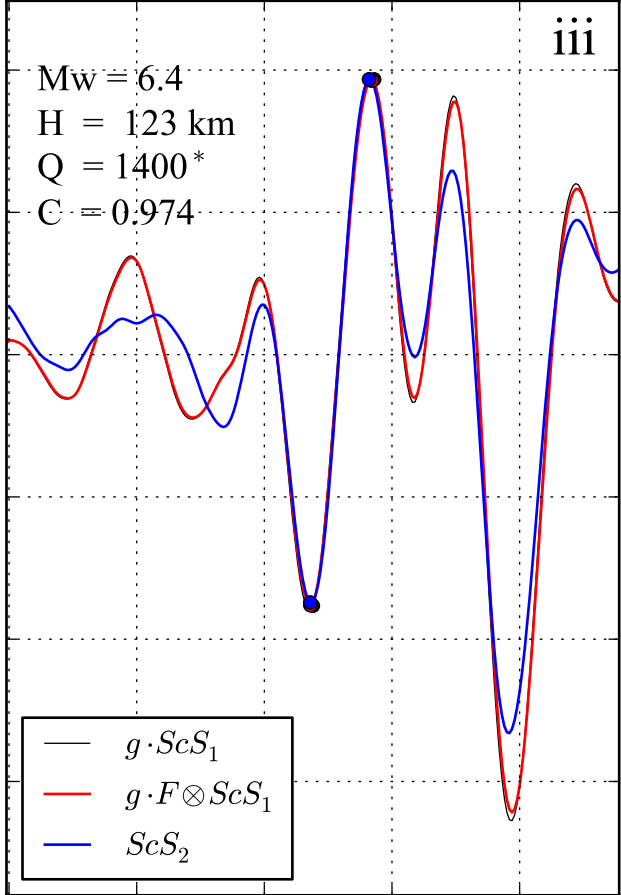

Time [s]

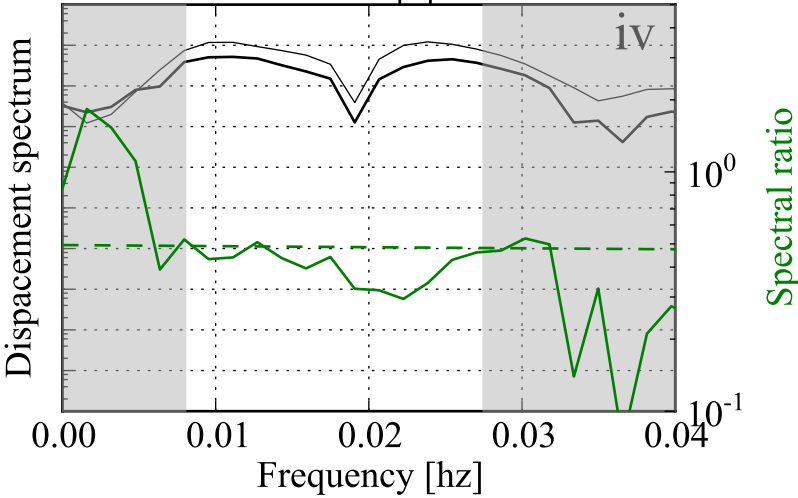

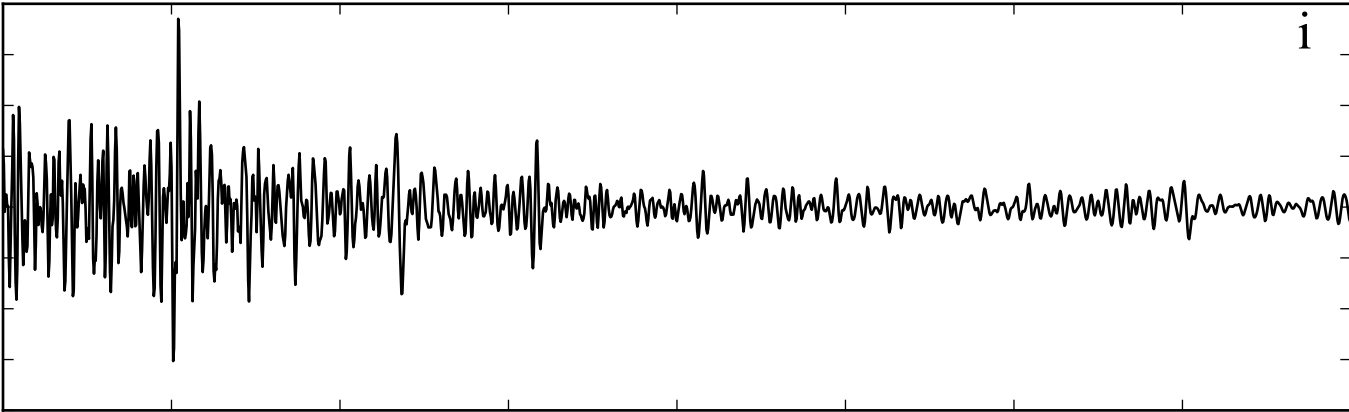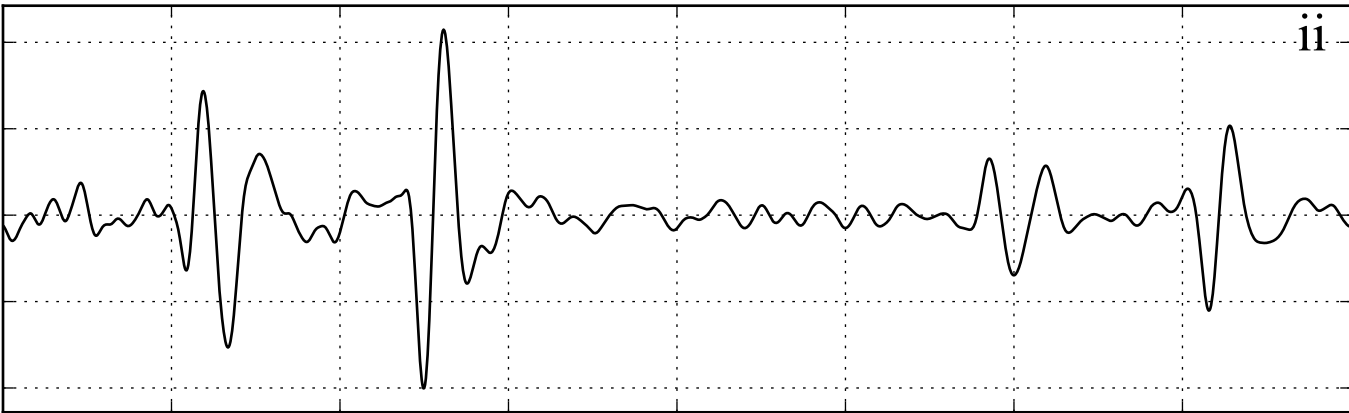

Time [s]

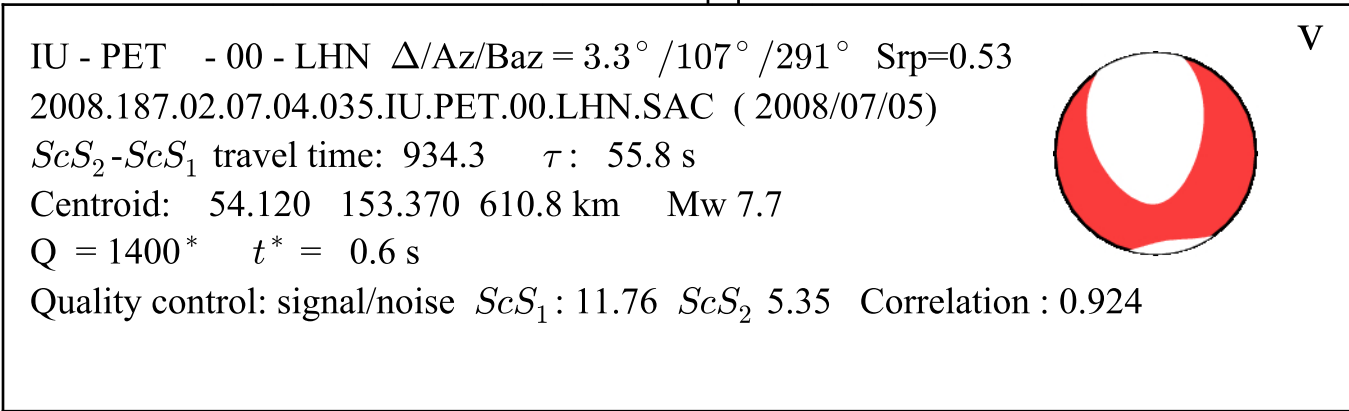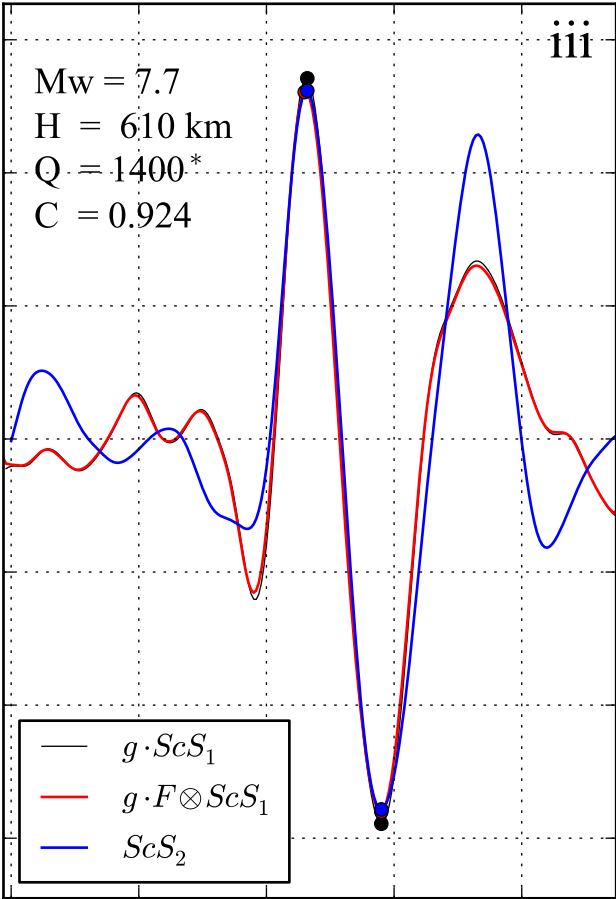

Time [s]

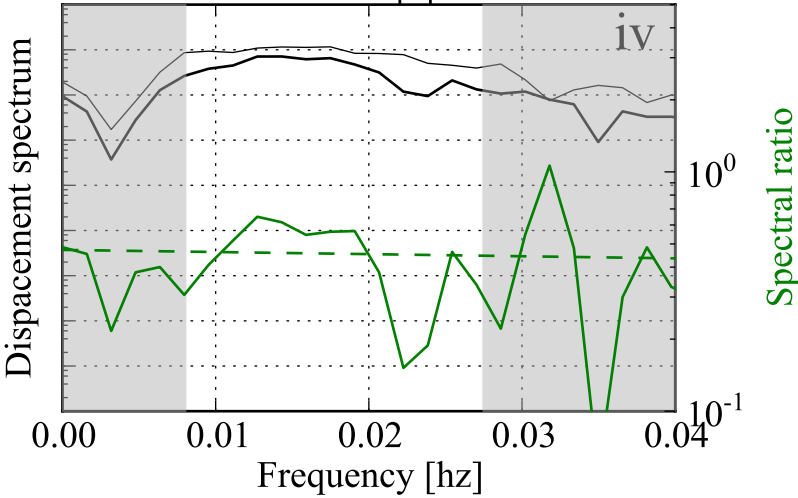

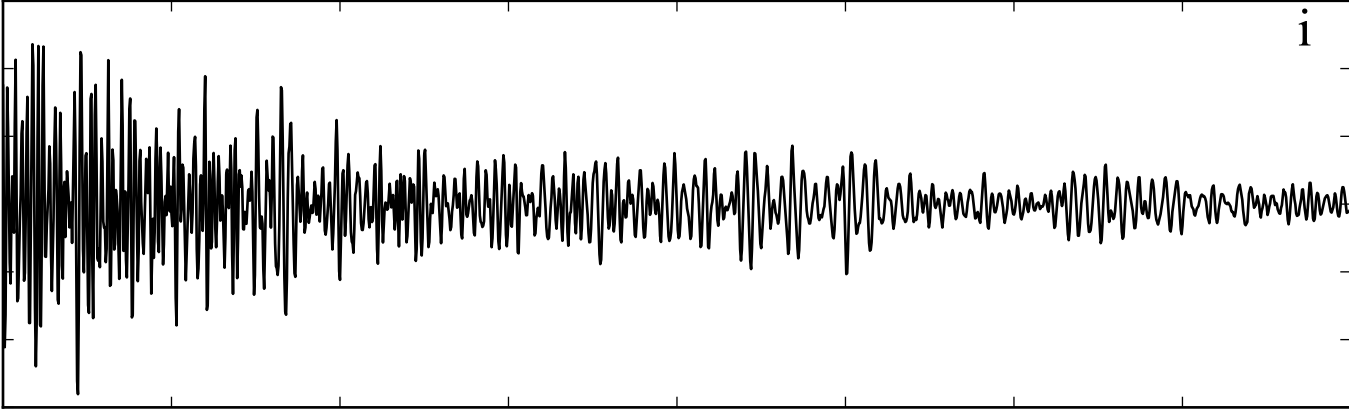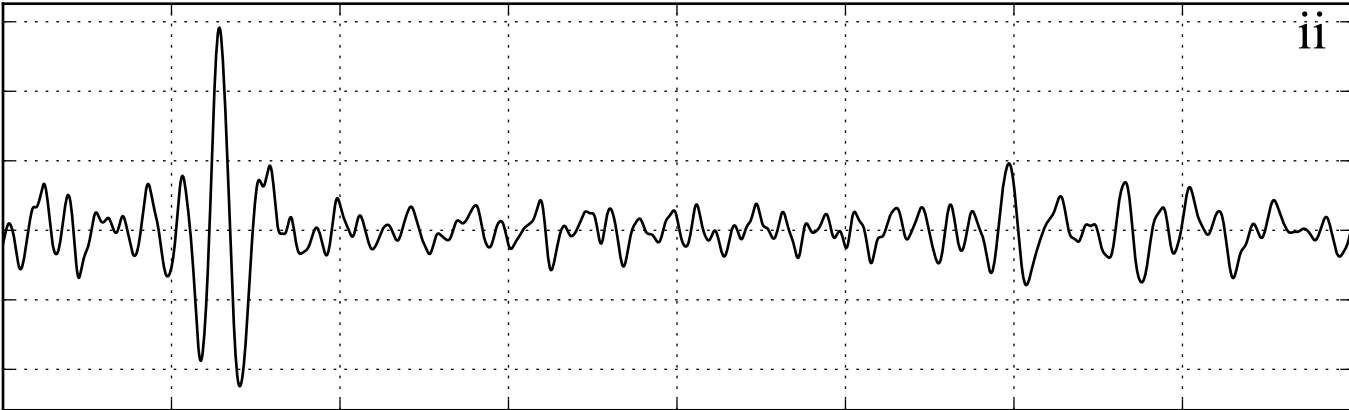

Time [s]

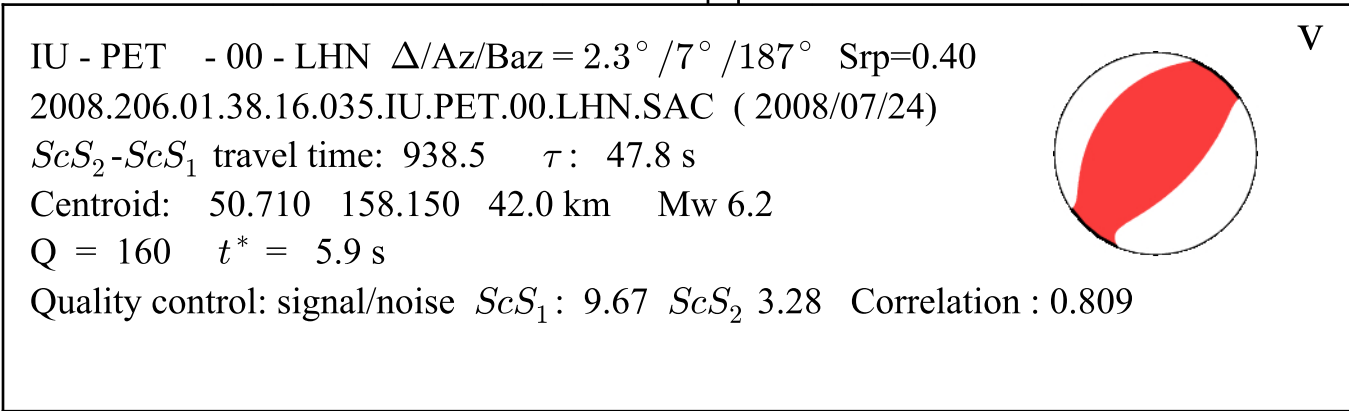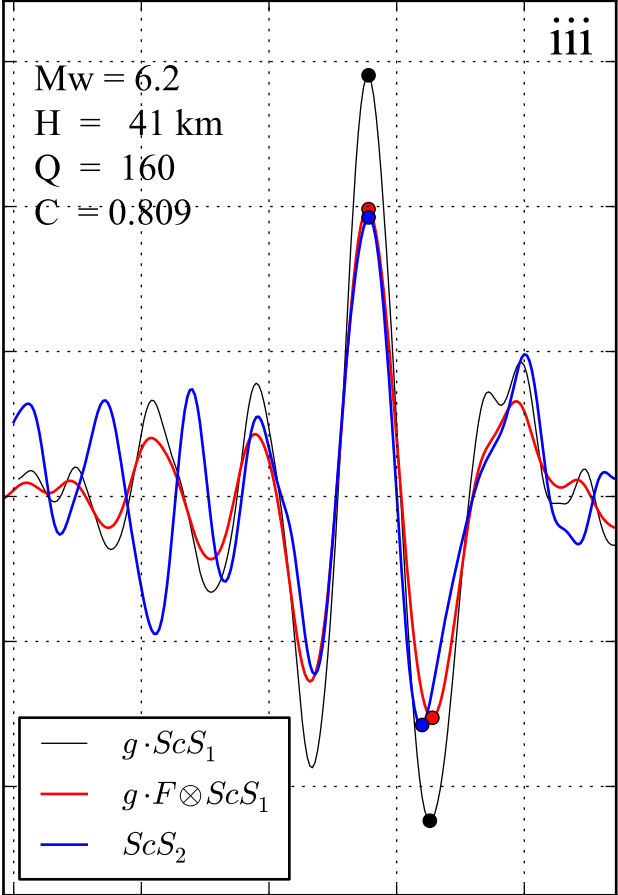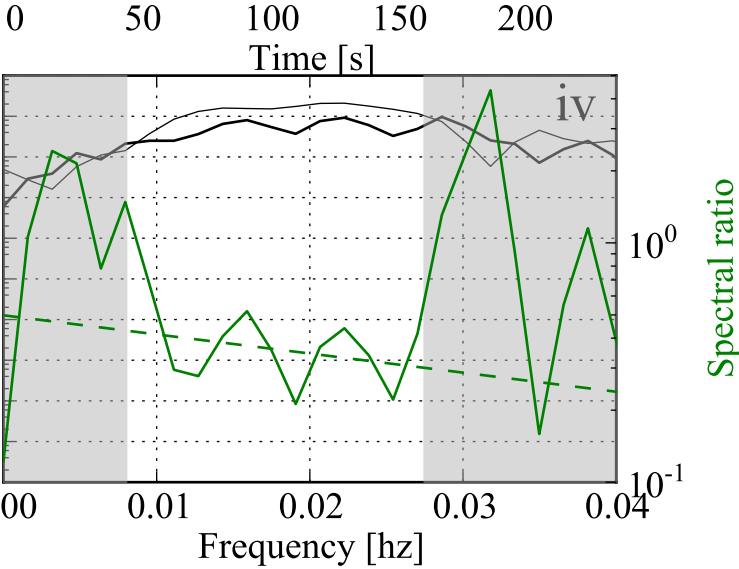

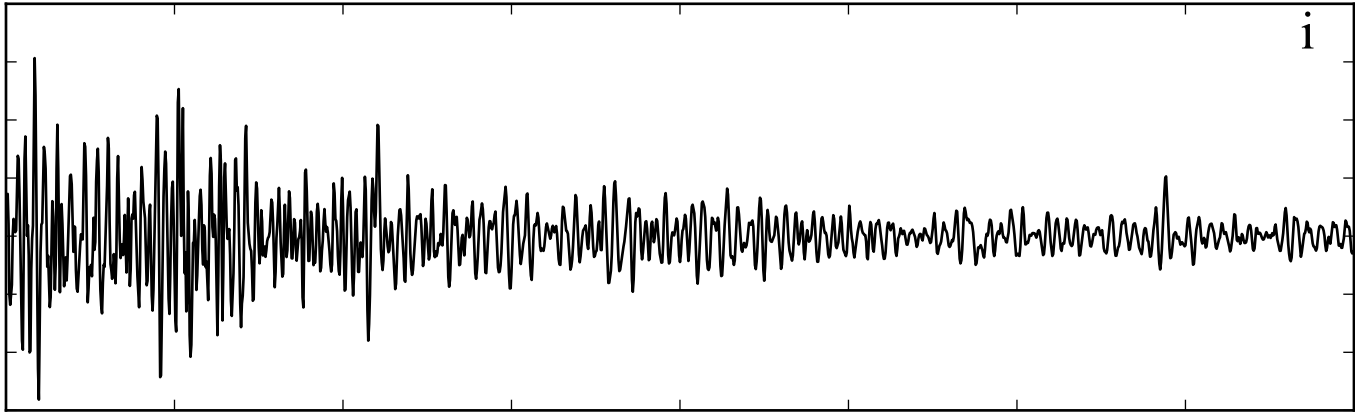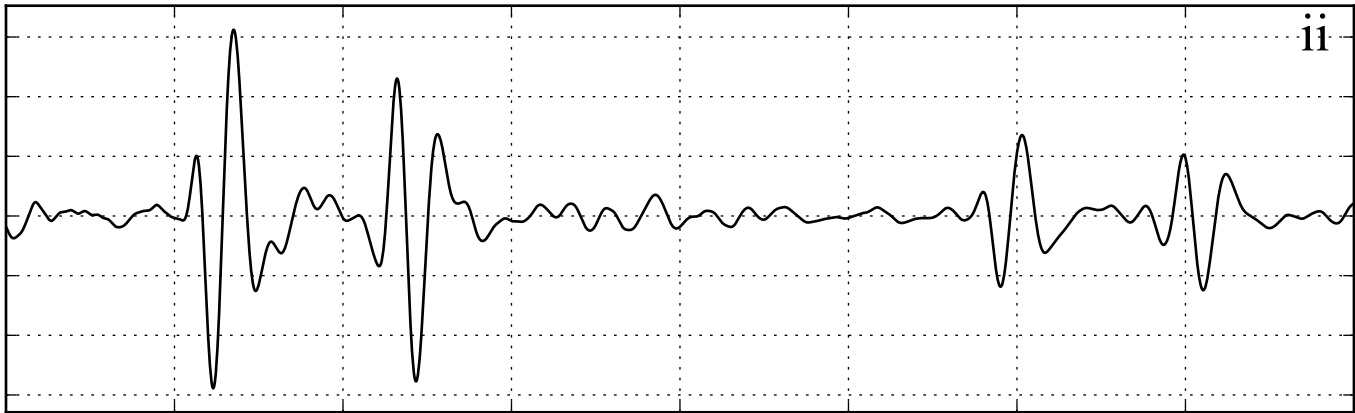

Time [s]

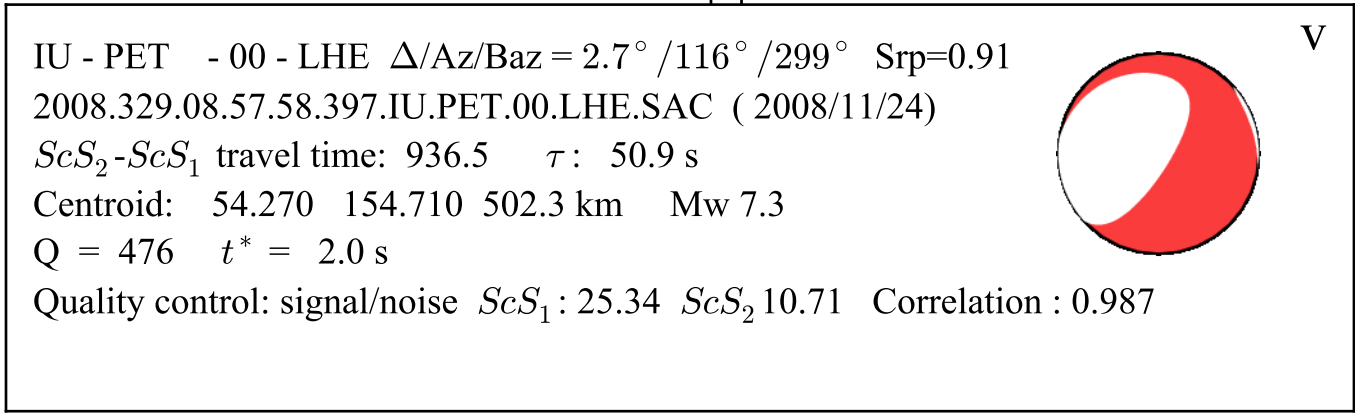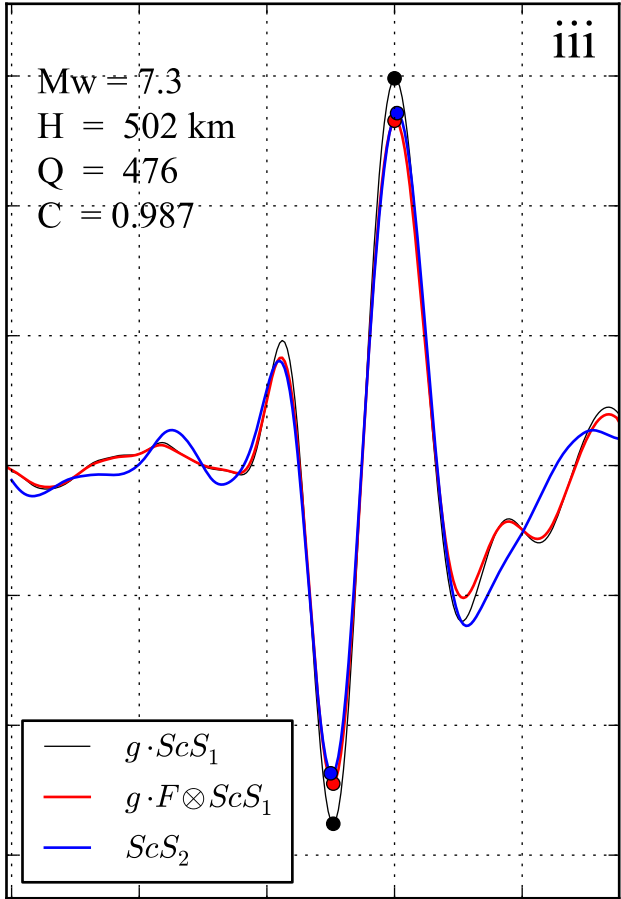

Time [s]

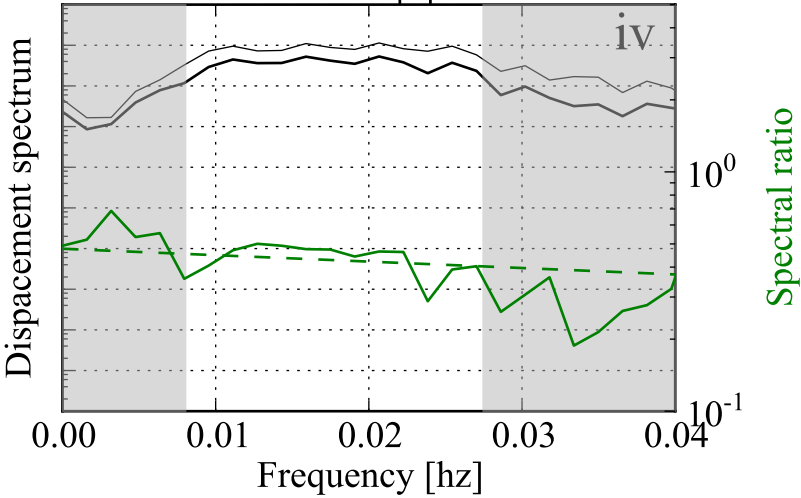

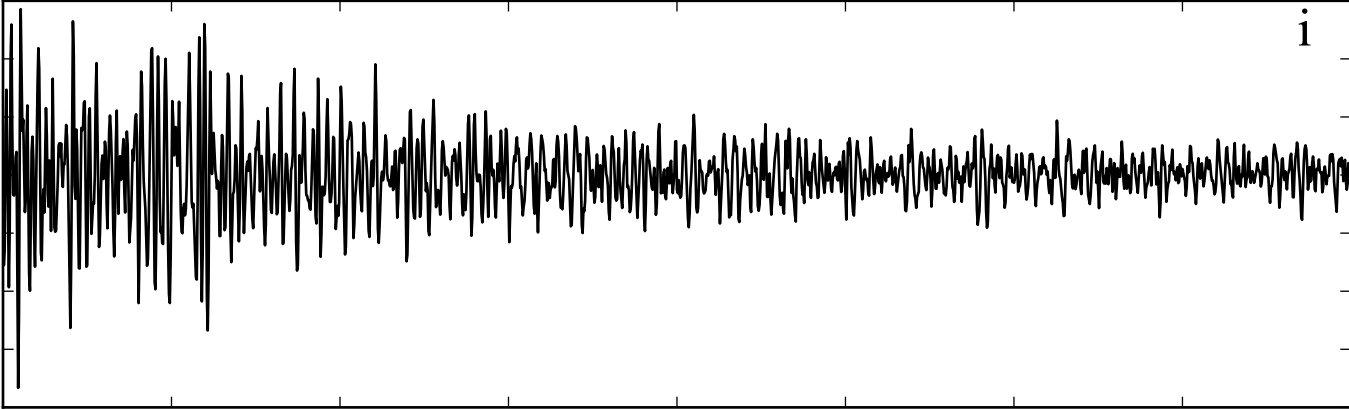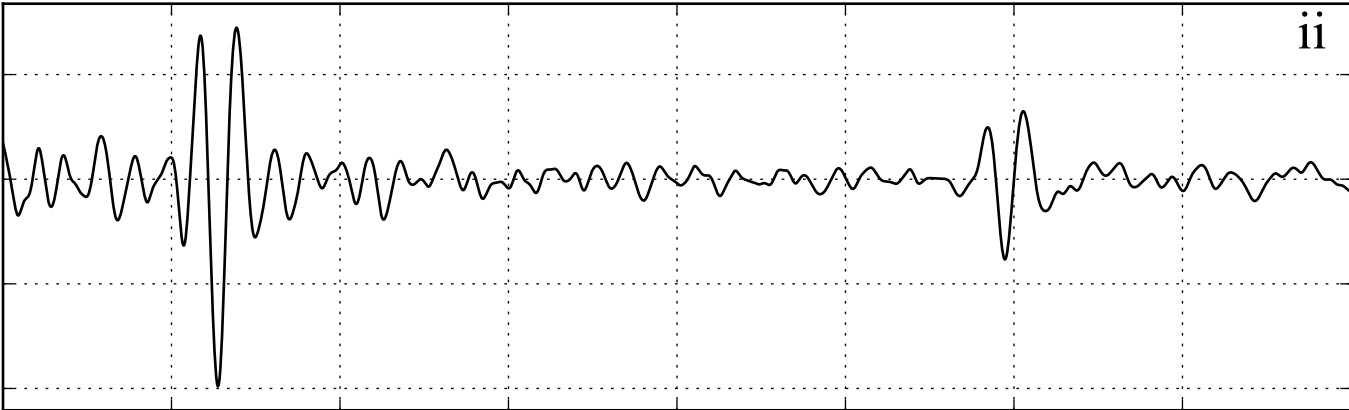

Time [s]

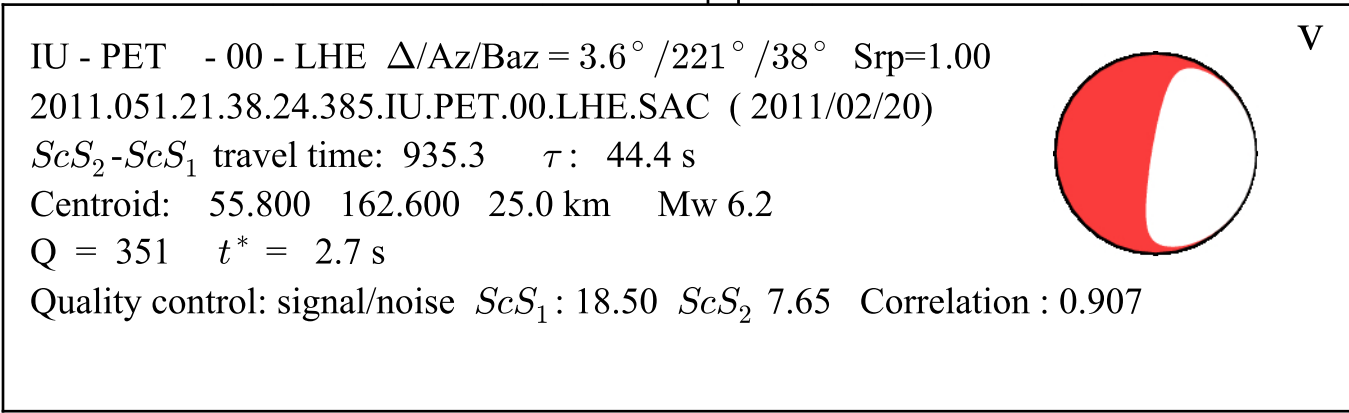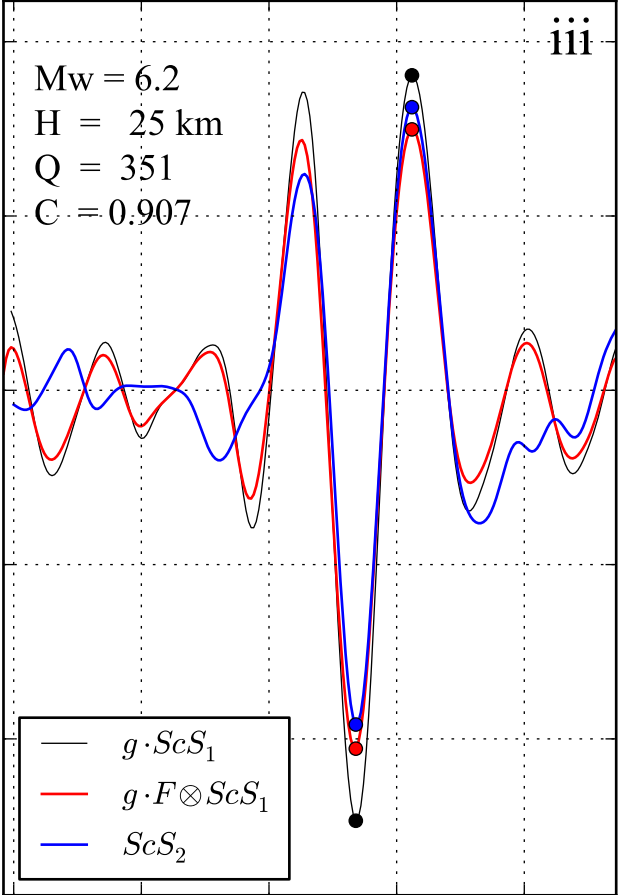

Time [s]

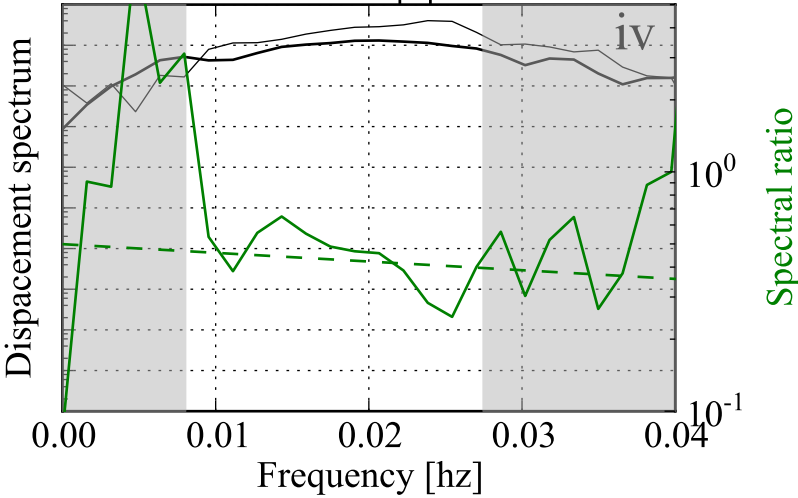



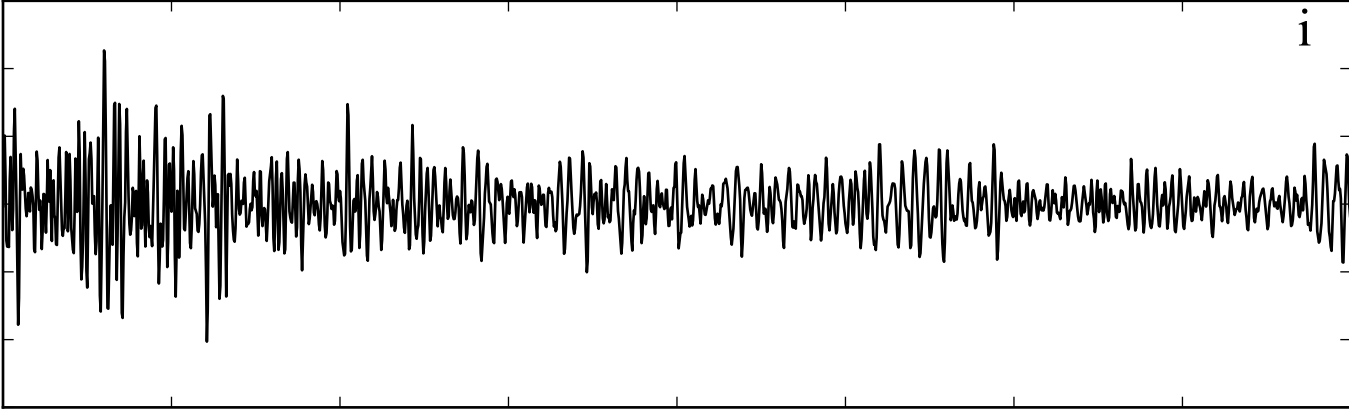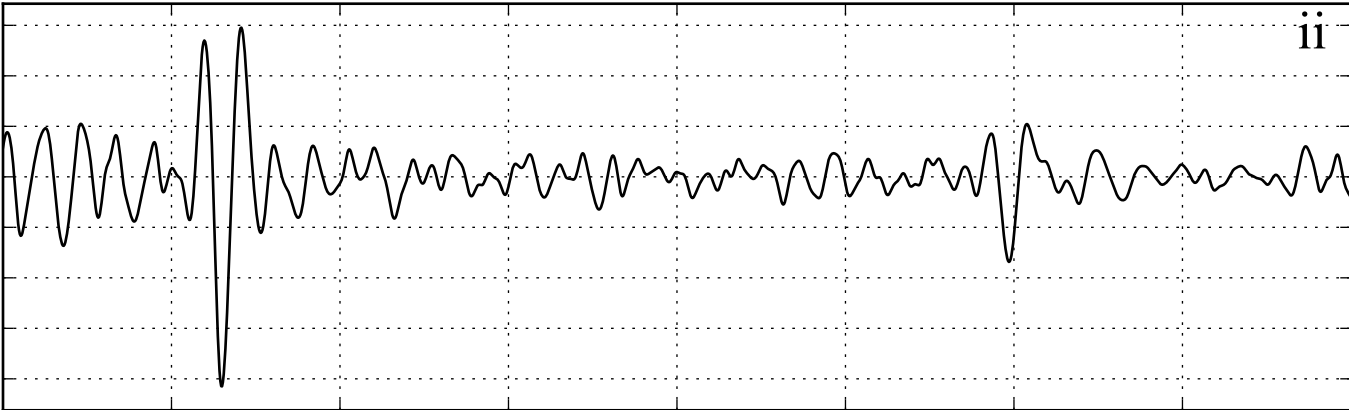

Time [s]

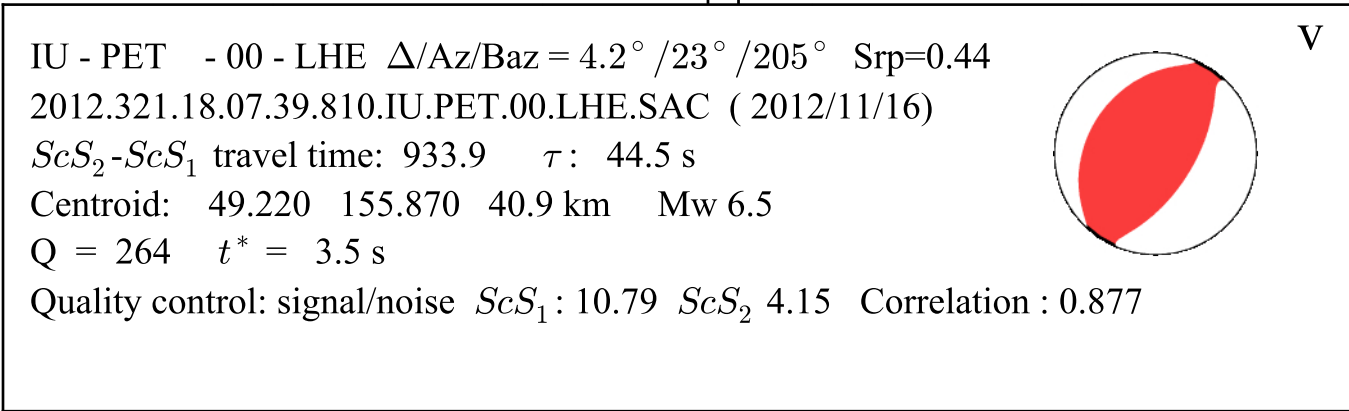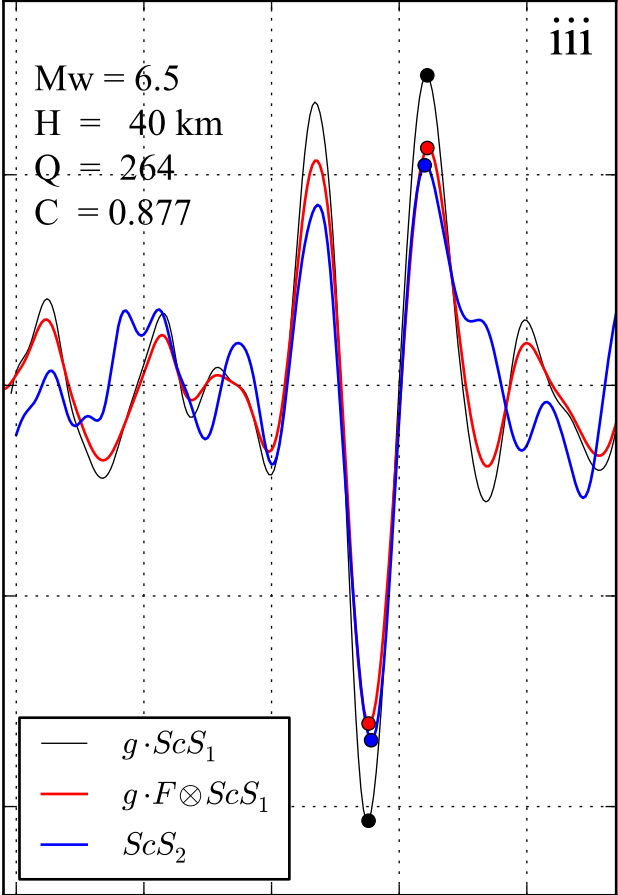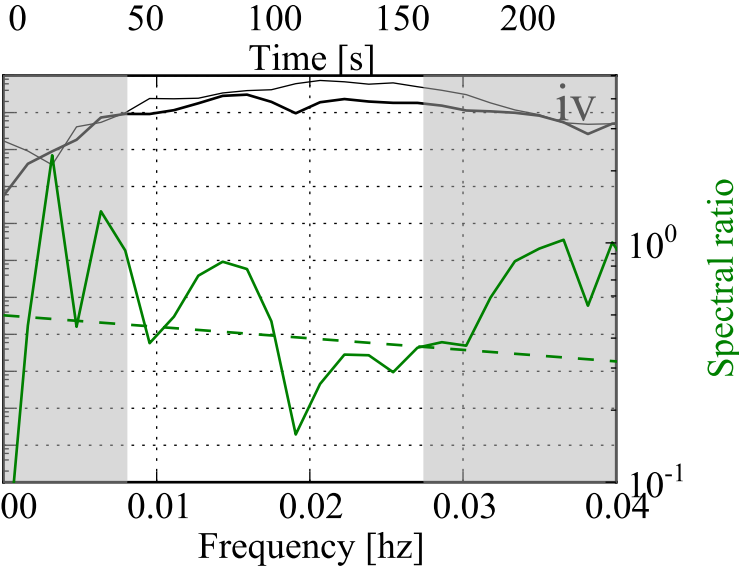

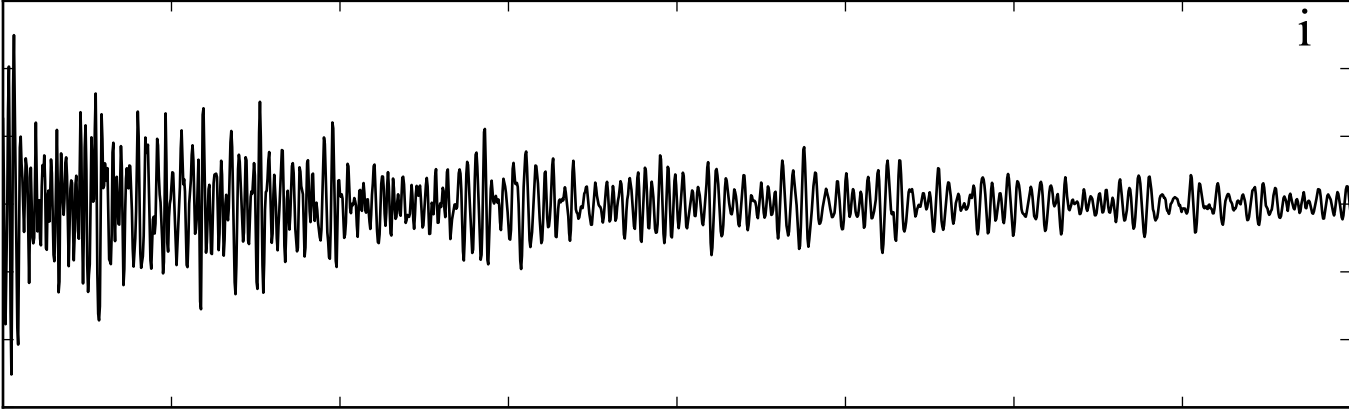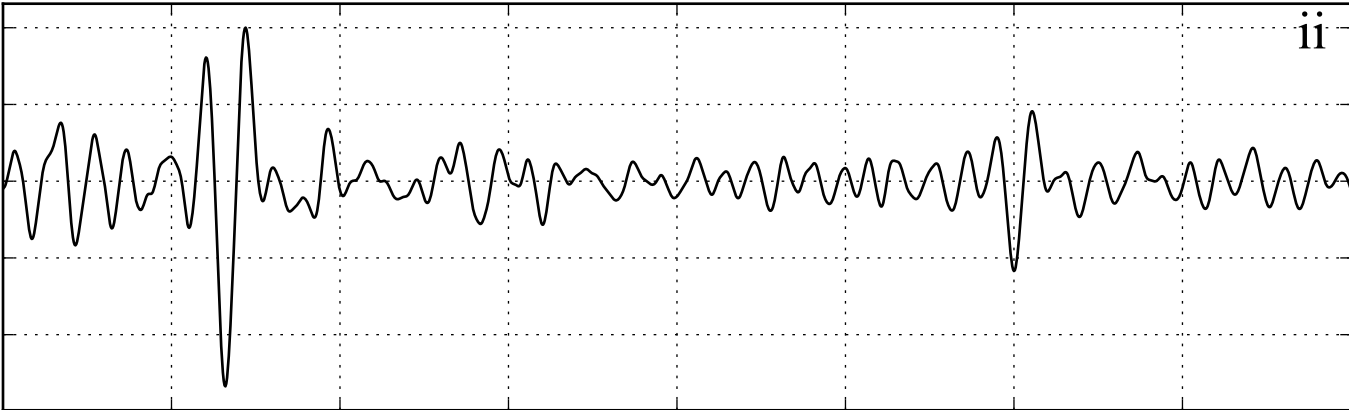

Time [s]

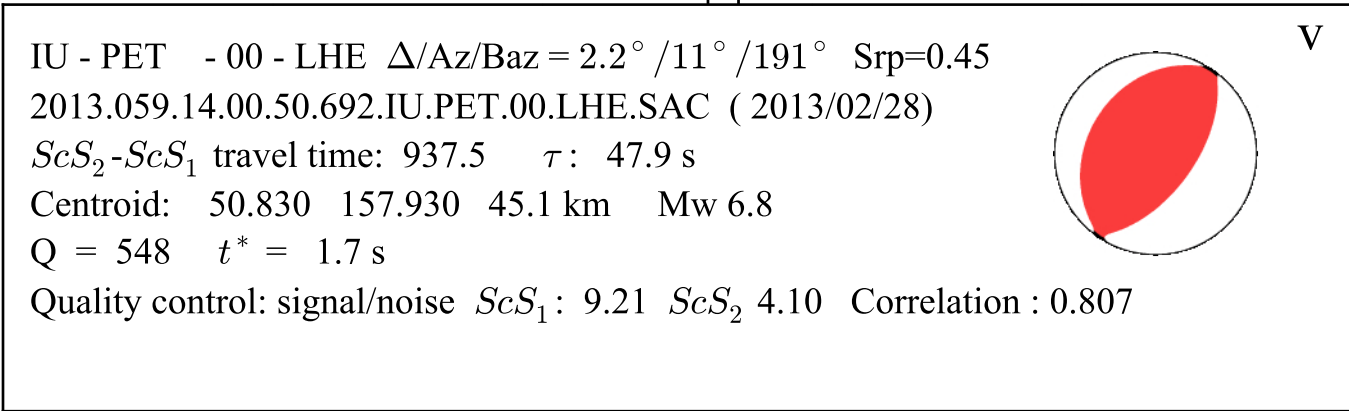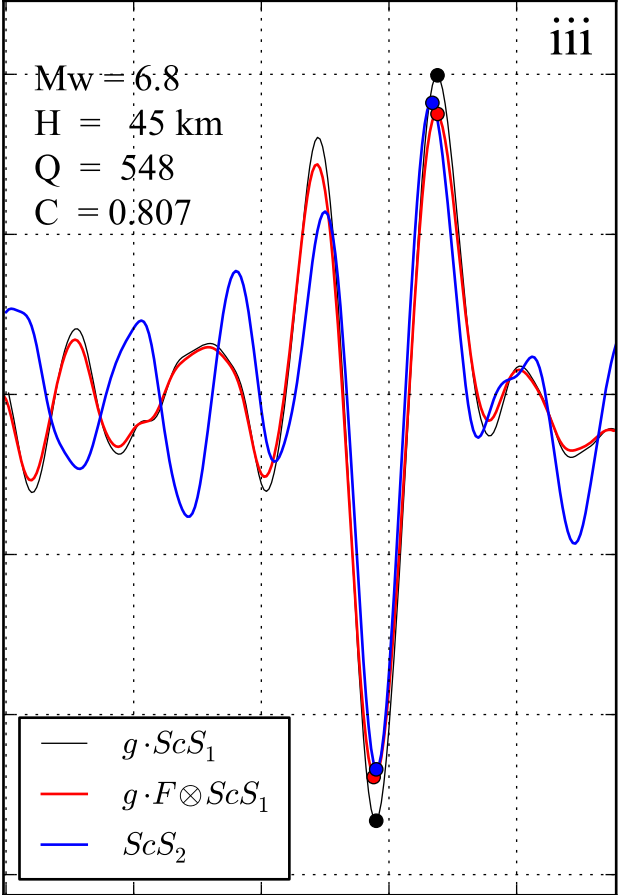

Time [s]

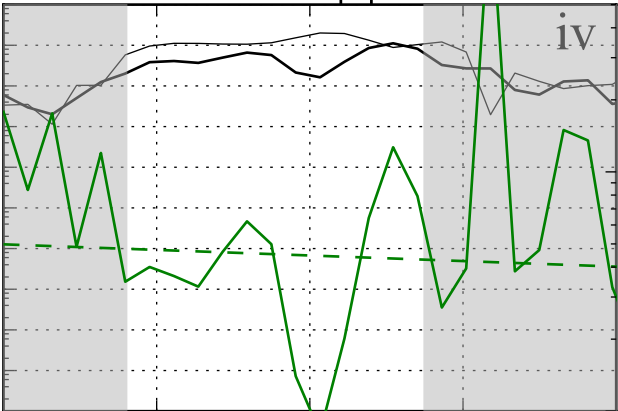

Frequency [hz]

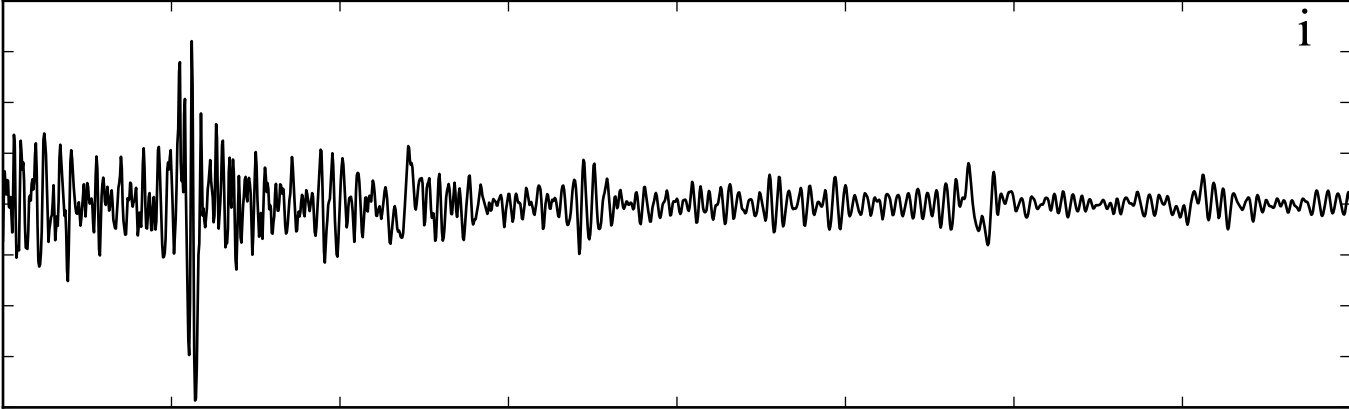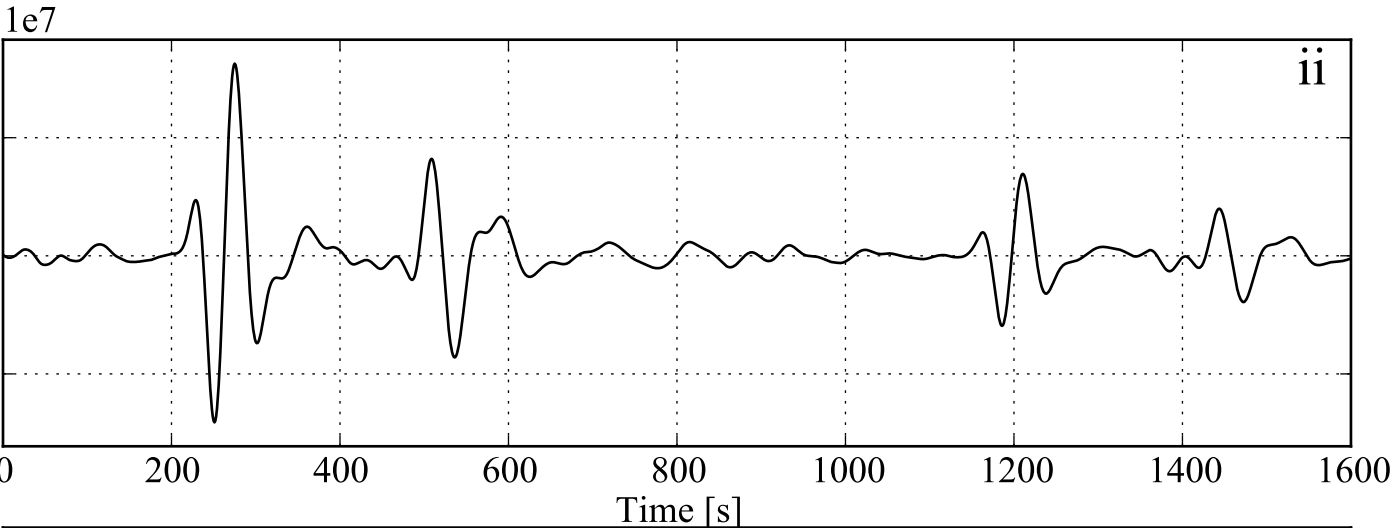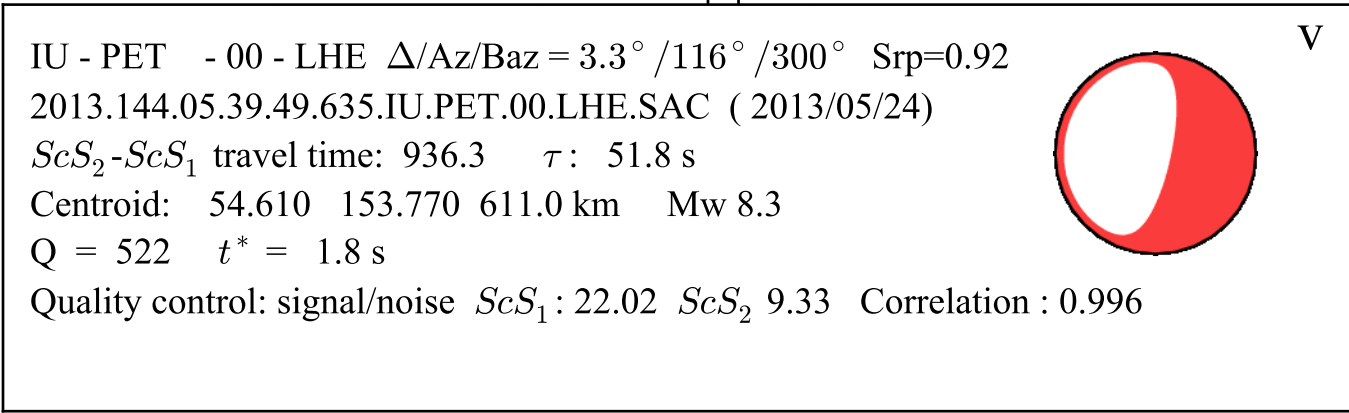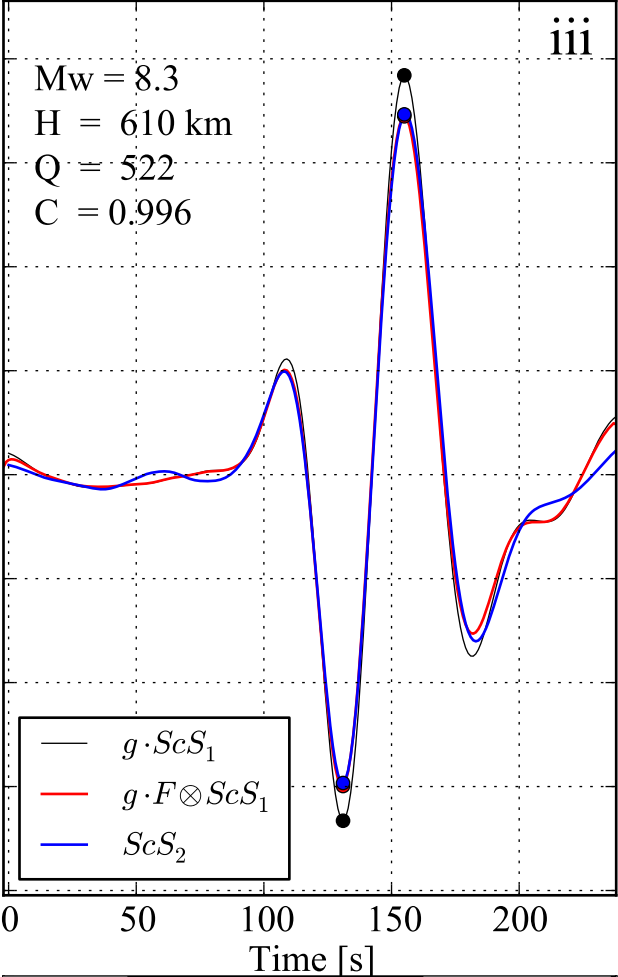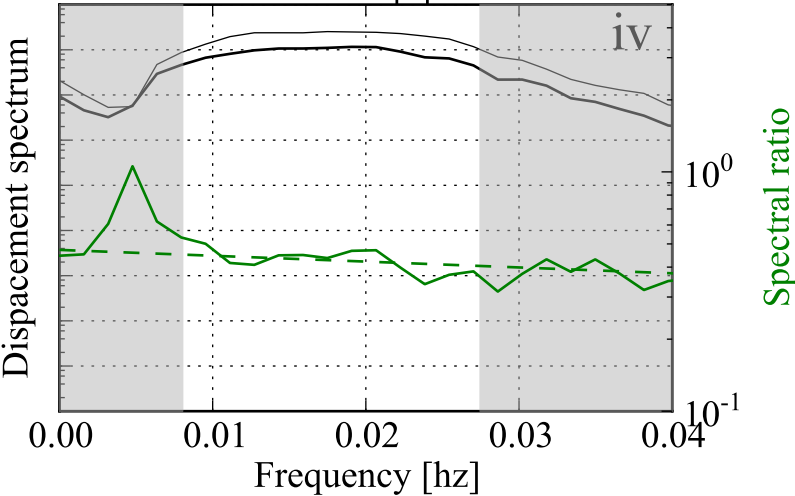

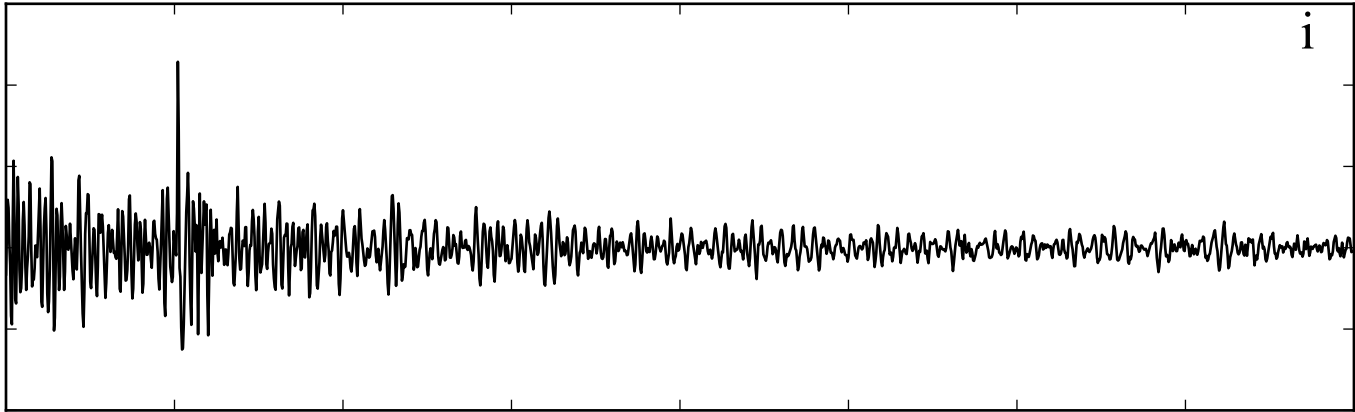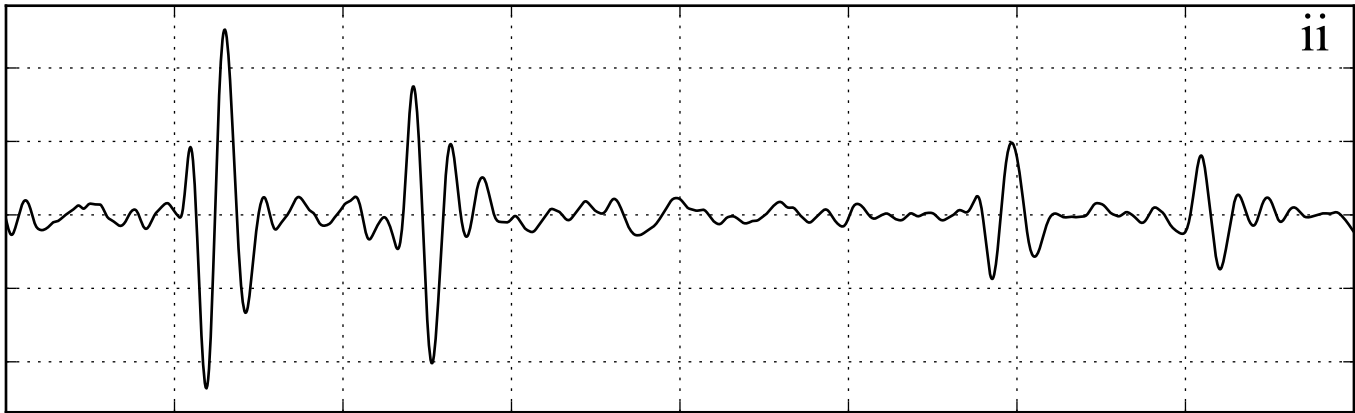

Time [s]

IU - PET - 00 - LHE  $\Delta/Az/Baz = 3.5^\circ/90^\circ/275^\circ$  Srp=0.64

2013.274.03.33.21.635.IU.PET.00.LHE.SAC (2013/10/01)

$ScS_2$ - $ScS_1$  travel time: 935.2  $\tau$ : 46.4 s

Centroid: 53.200 152.810 585.5 km Mw 6.7

$Q = 274$   $t^* = 3.4$  s

Quality control: signal/noise  $ScS_1$ : 20.77  $ScS_2$  7.88 Correlation : 0.972

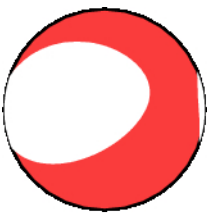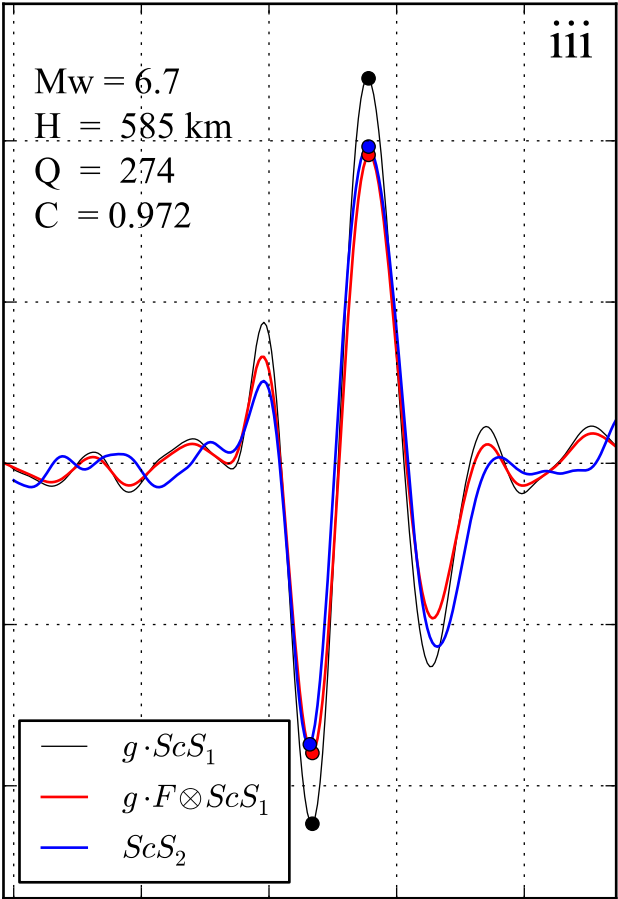

Time [s]

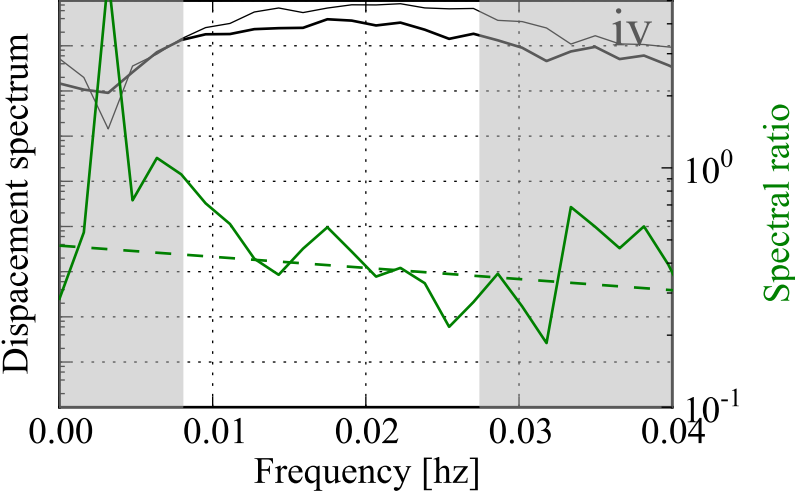

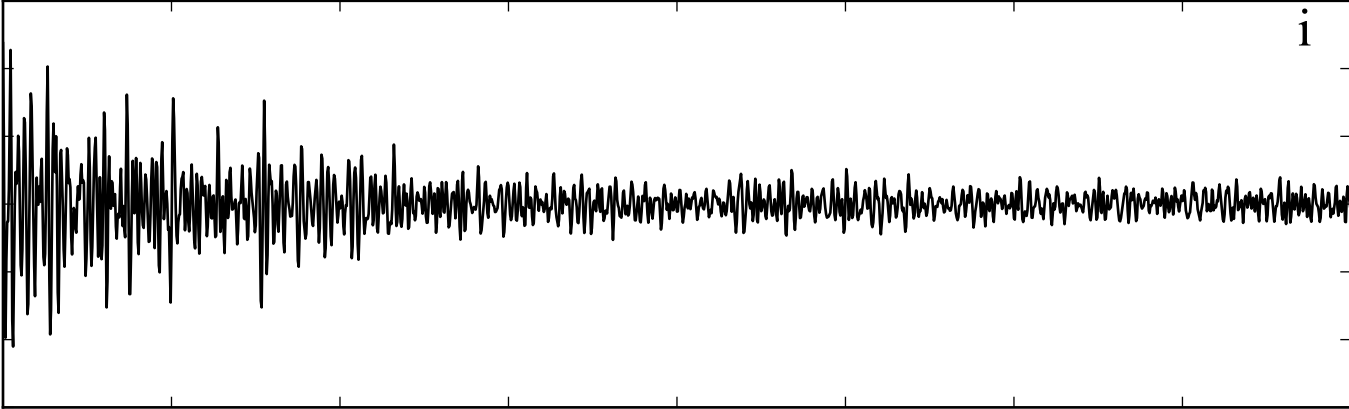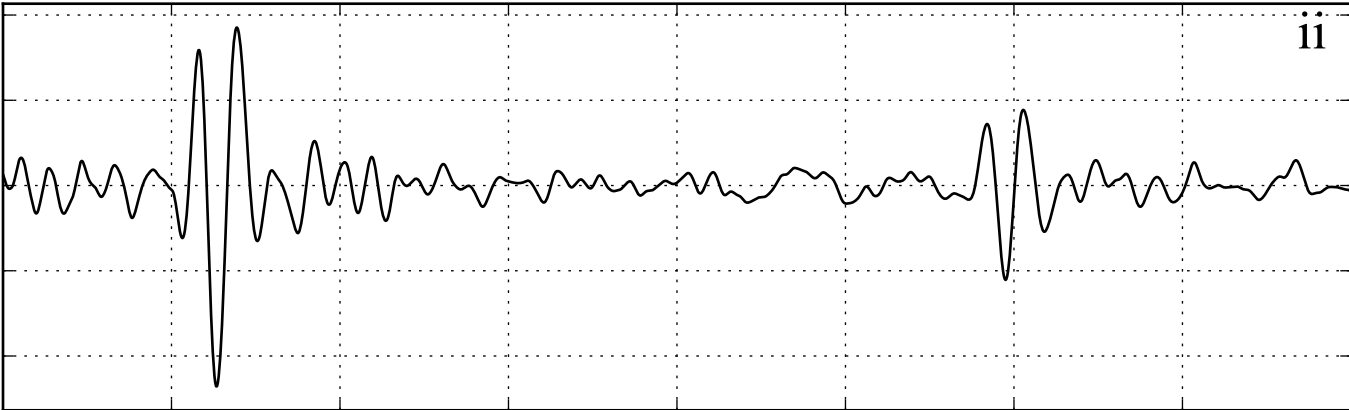

Time [s]

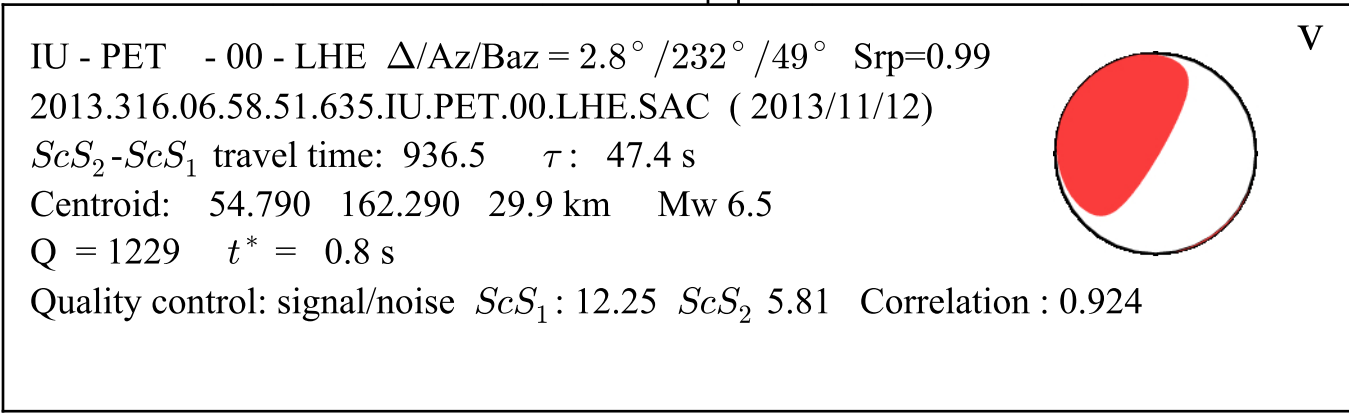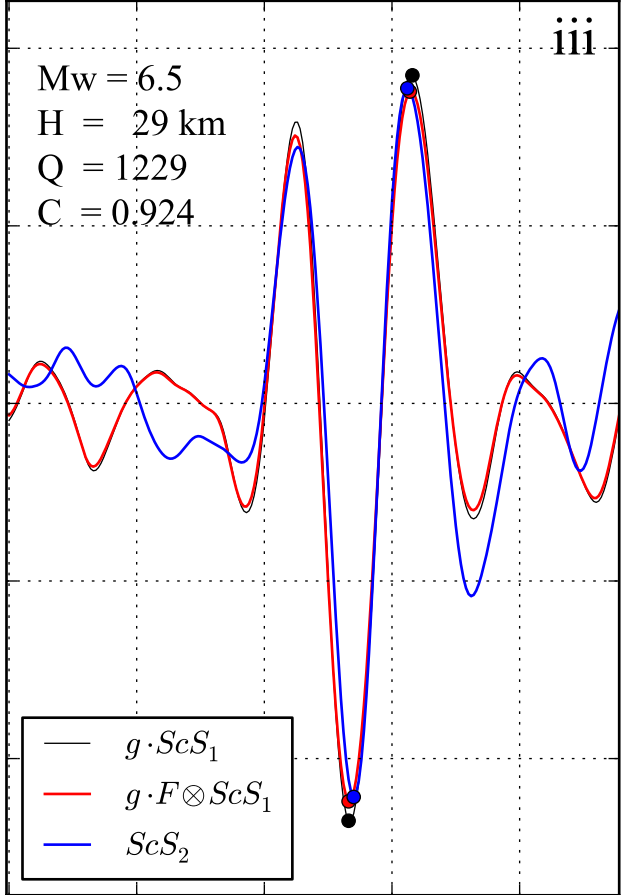

Time [s]

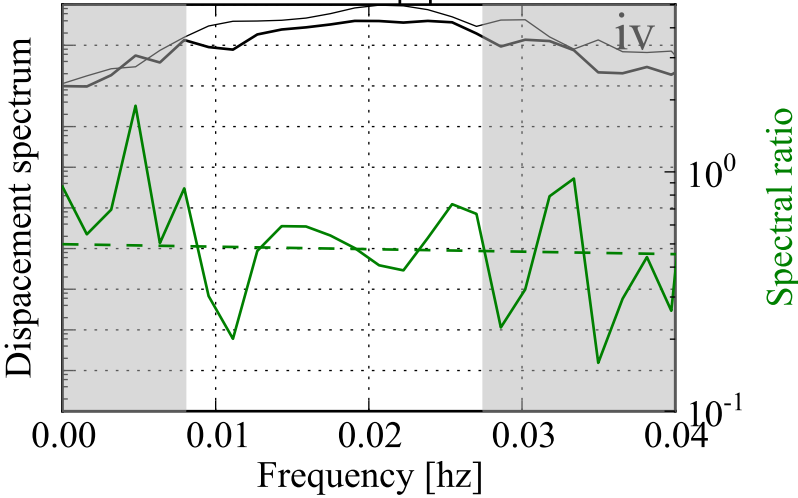

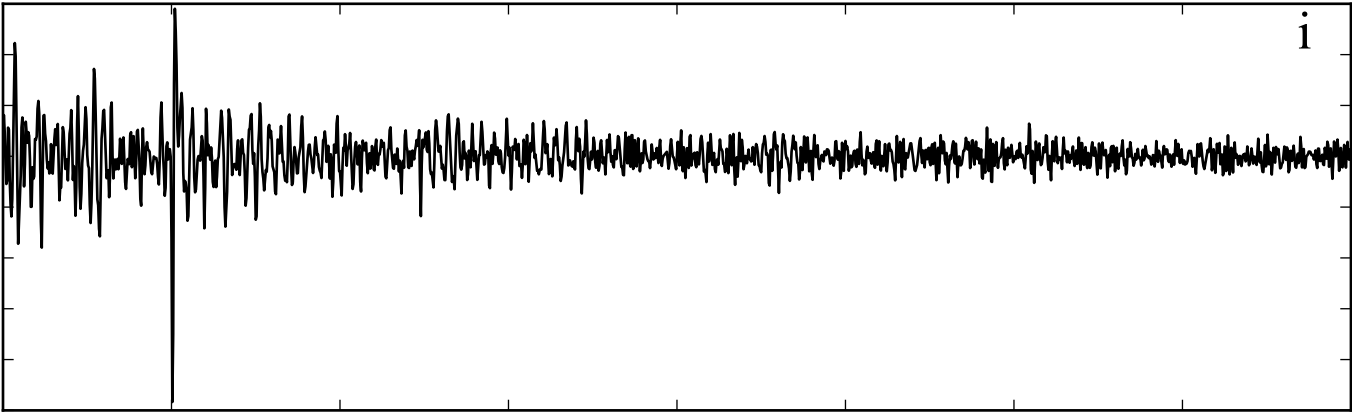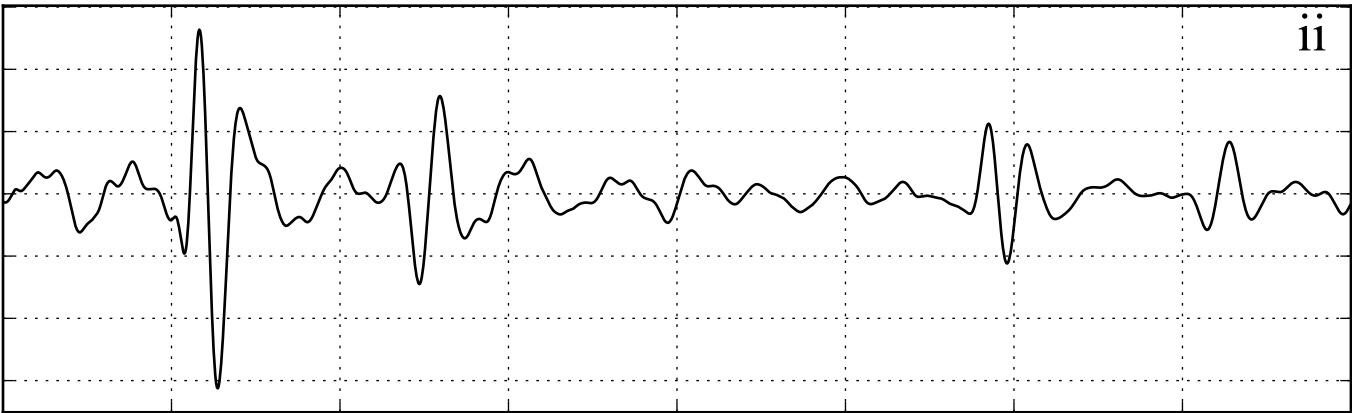

Time [s]

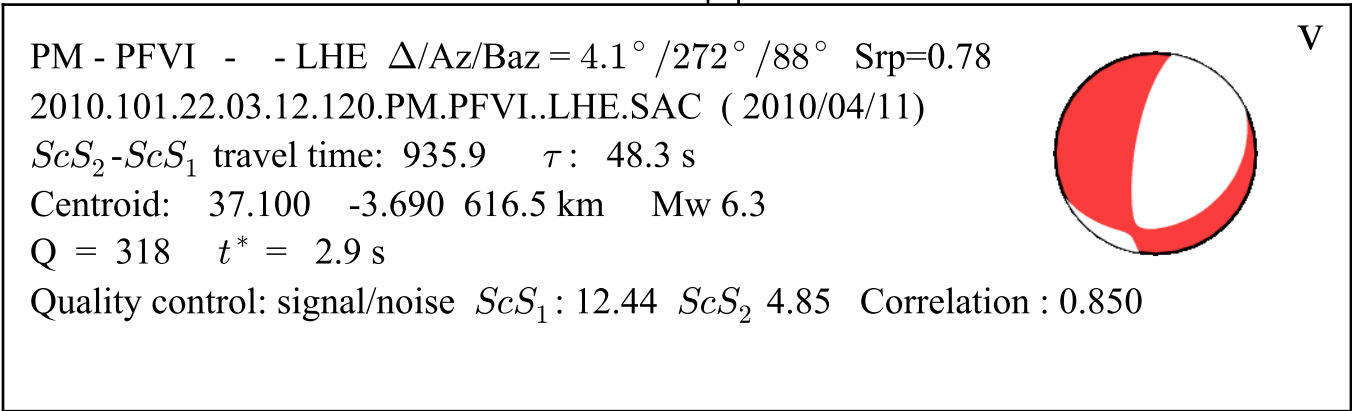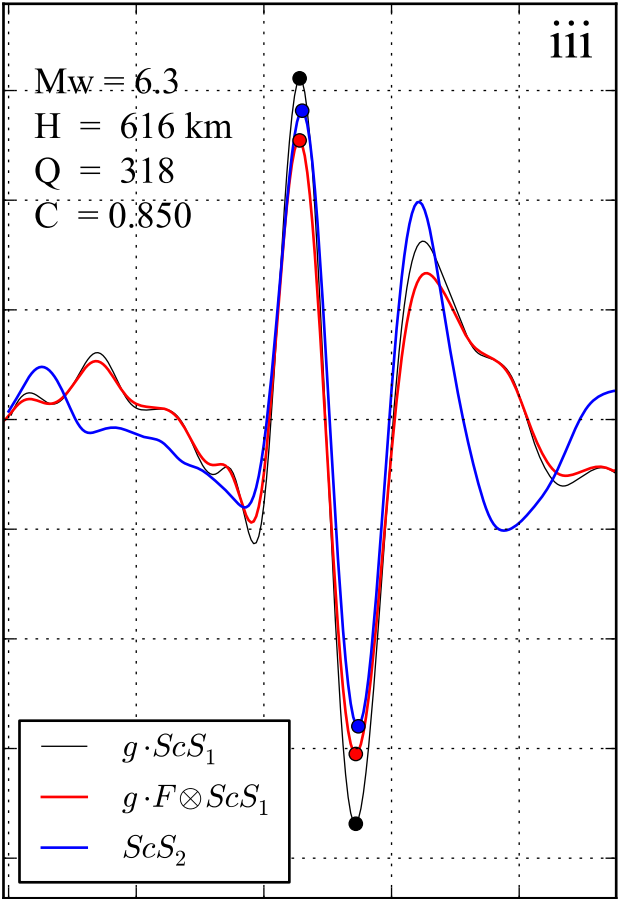

Time [s]

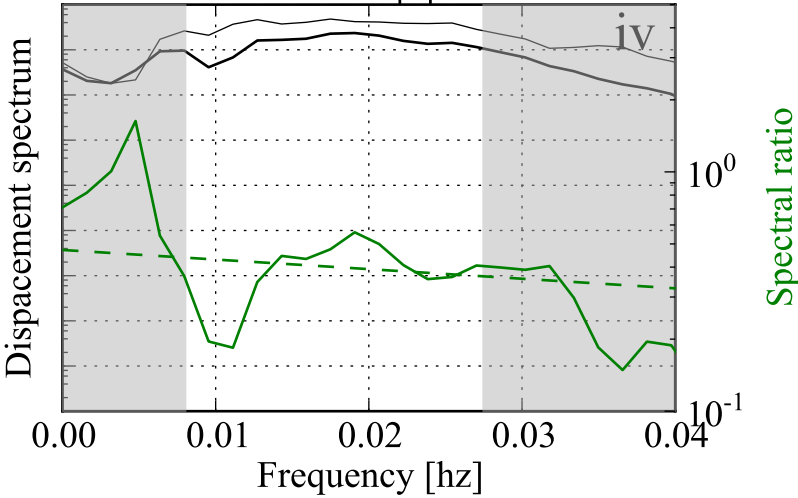

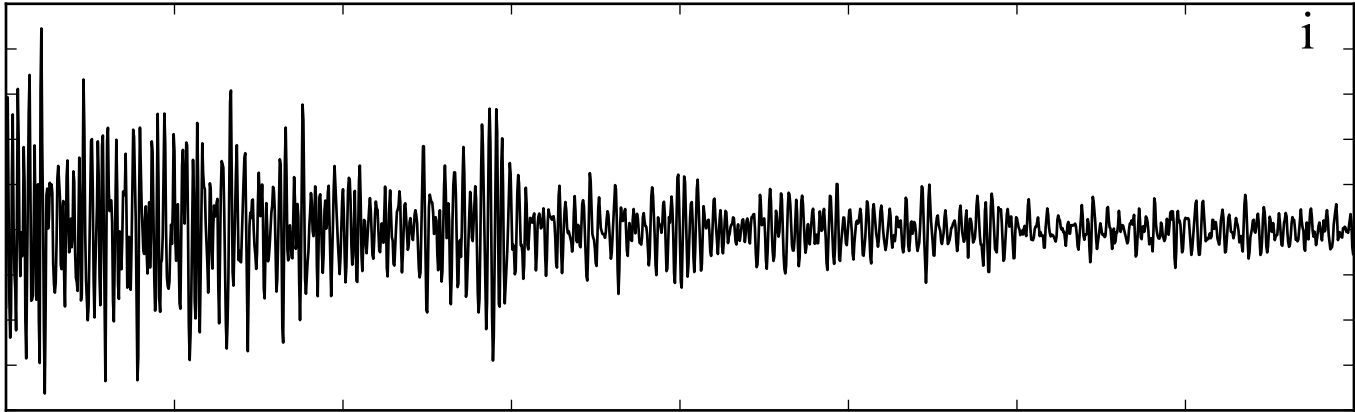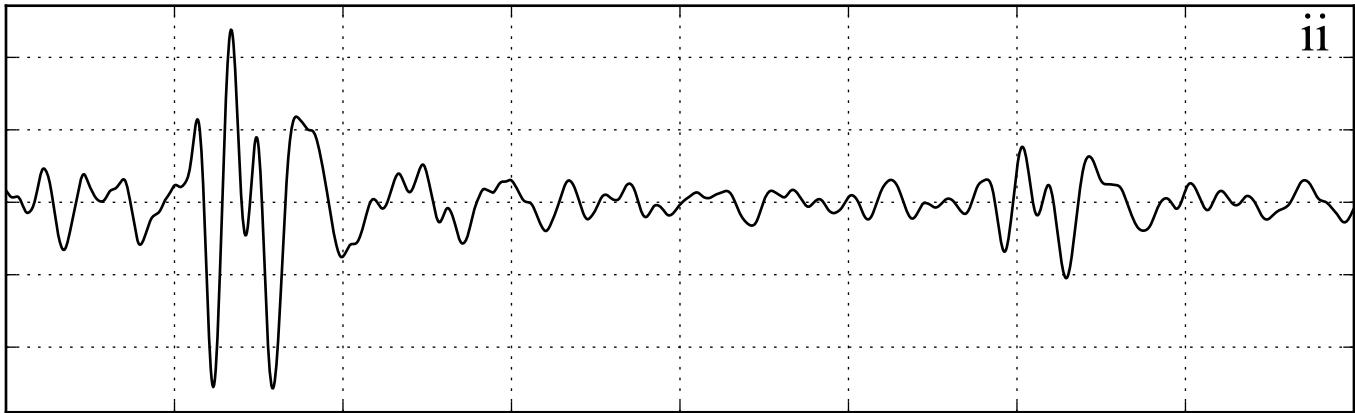

Time [s]

ND - PINNC - 00 - LHN  $\Delta/Az/Baz = 2.7^\circ/245^\circ/66^\circ$  Srp=0.78  
2014.121.06.31.35.956.ND.PINNC.00.LHN.SAC ( 2014/05/01)  
 $ScS_2$ - $ScS_1$  travel time: 938.4  $\tau$ : 42.9 s  
Centroid: -21.510 170.150 119.5 km Mw 6.6  
 $Q = 132$   $t^* = 7.1$  s  
Quality control: signal/noise  $ScS_1$ : 12.00  $ScS_2$  3.53 Correlation : 0.920

v



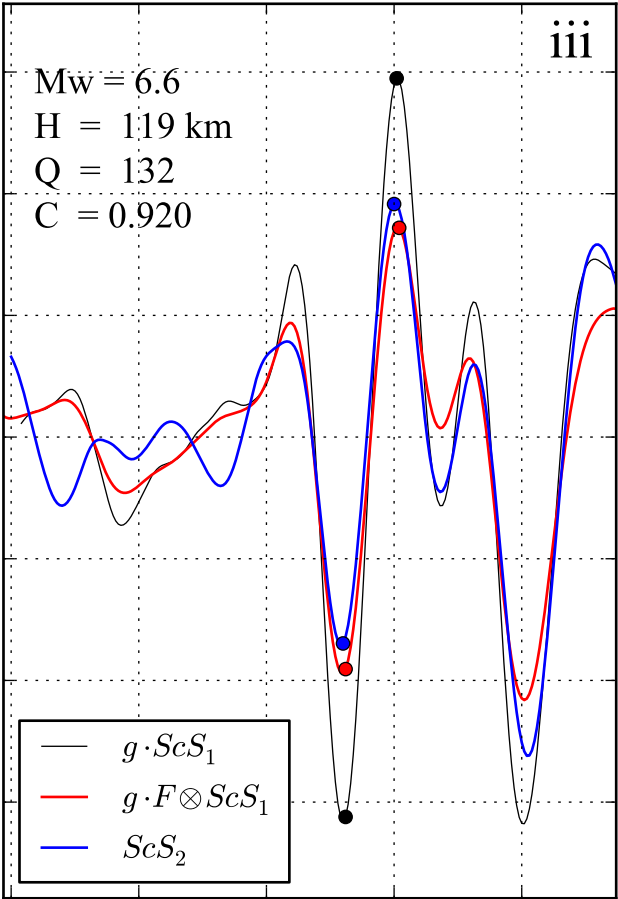

Time [s]

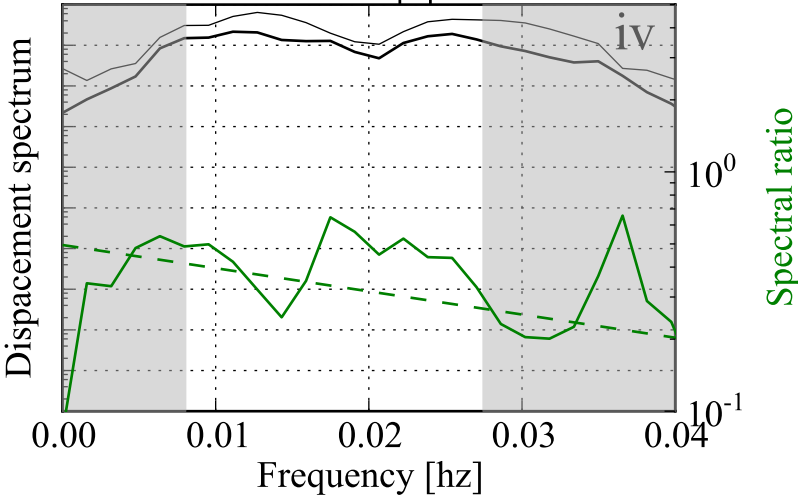

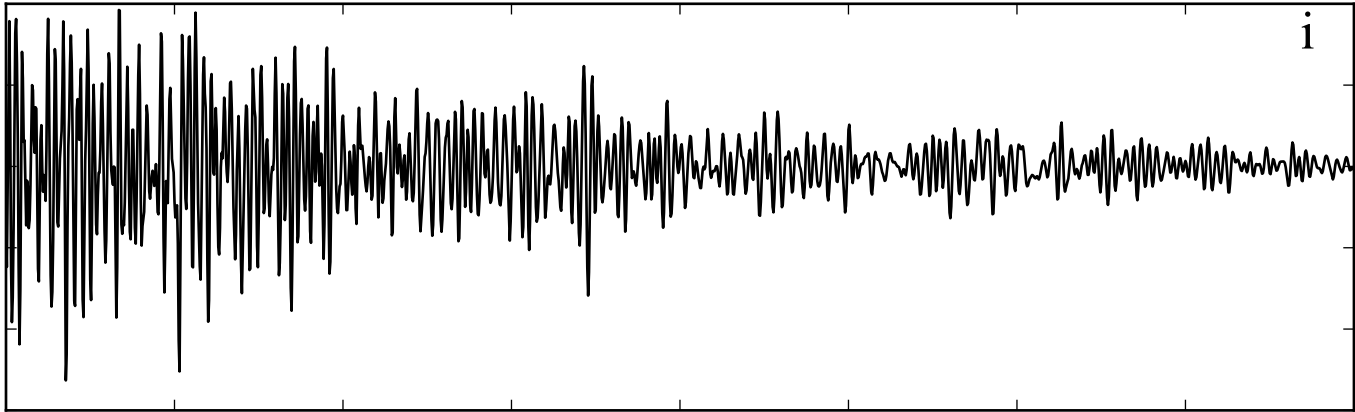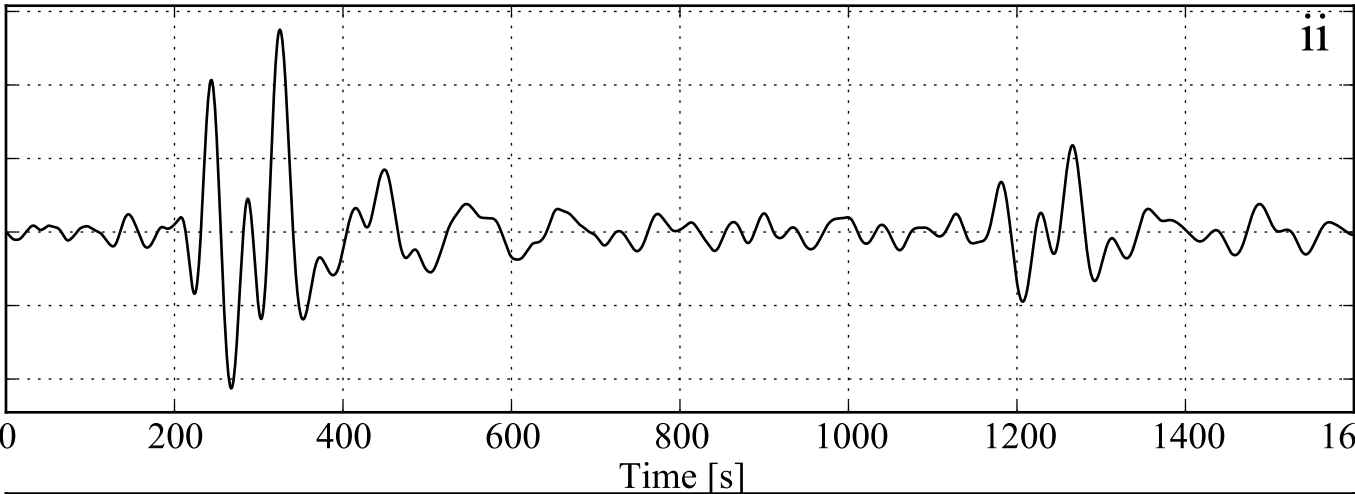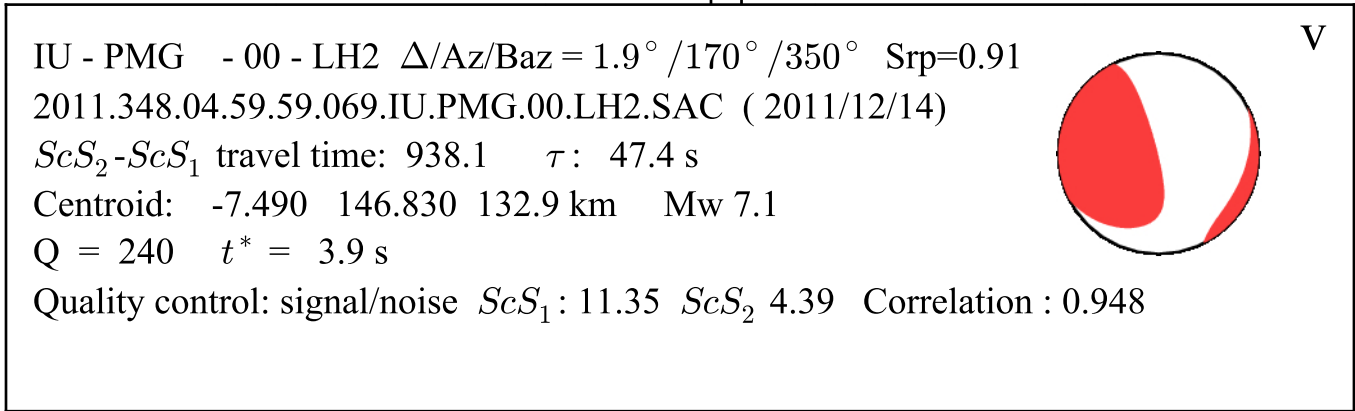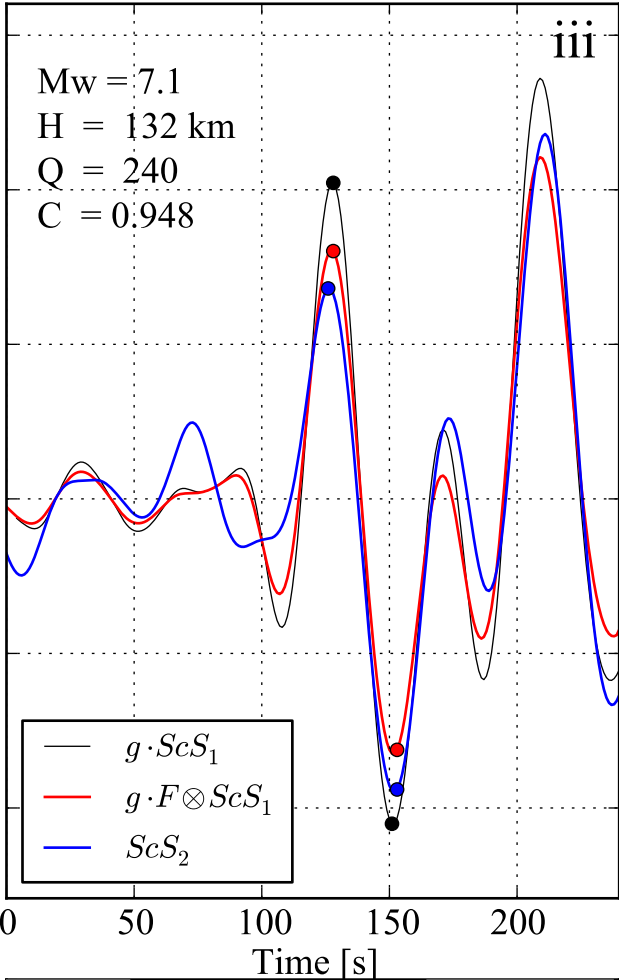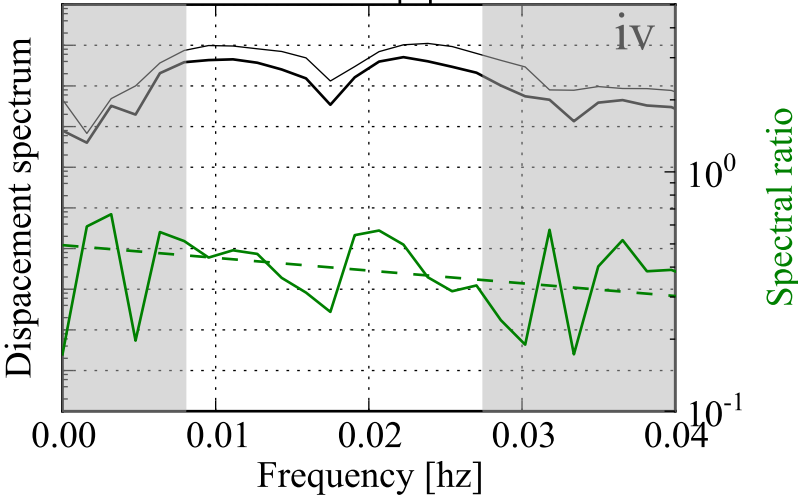



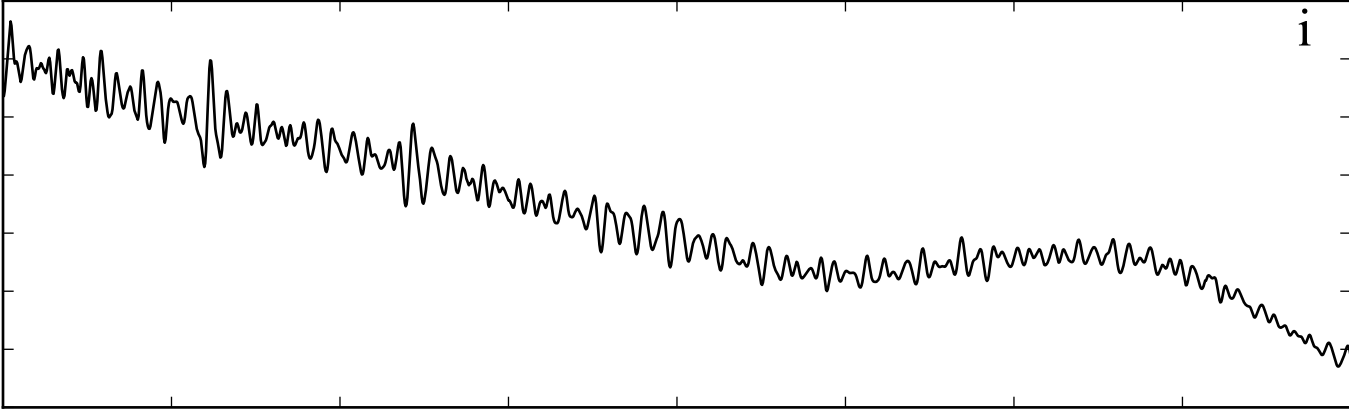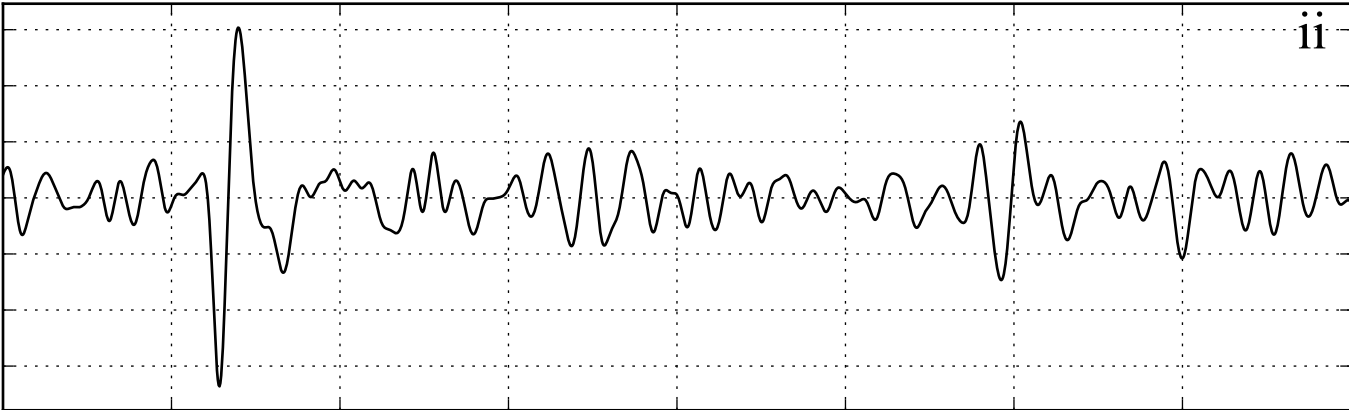

Time [s]

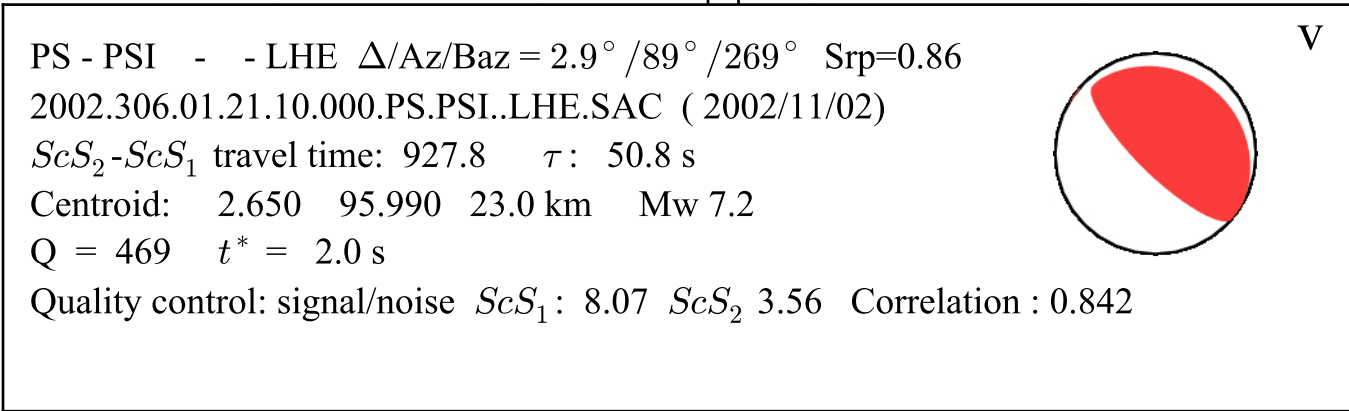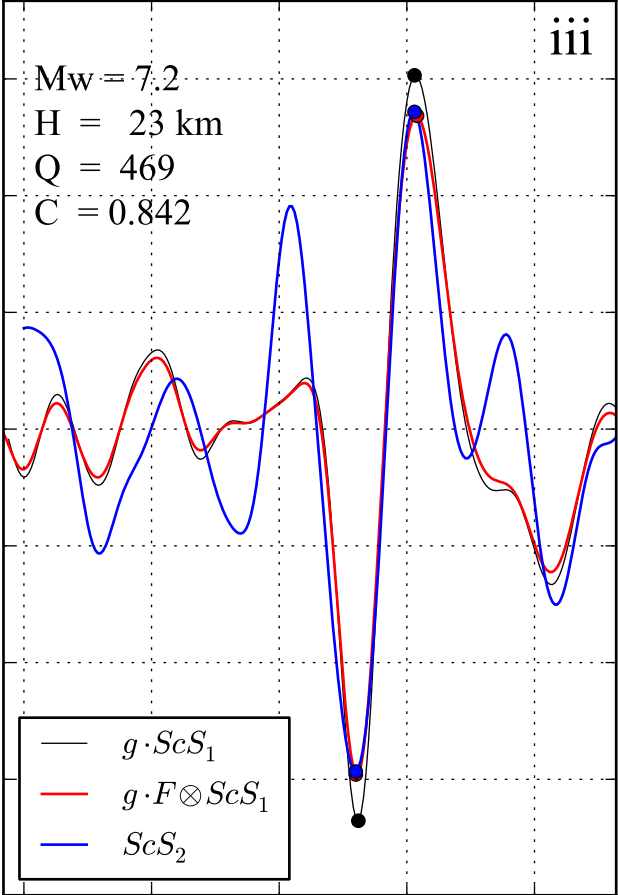

Time [s]

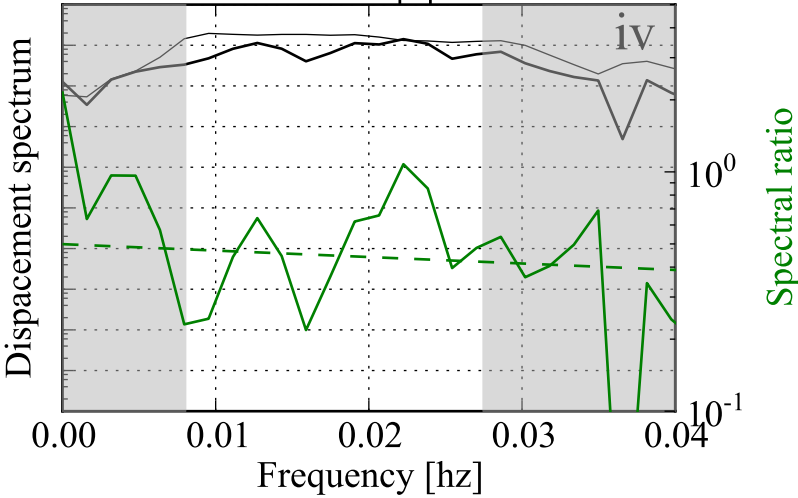

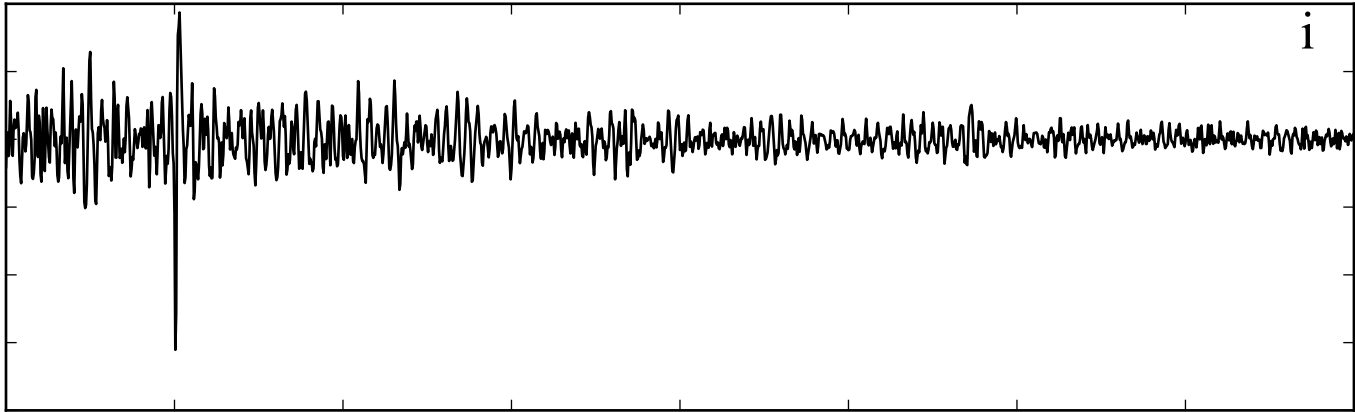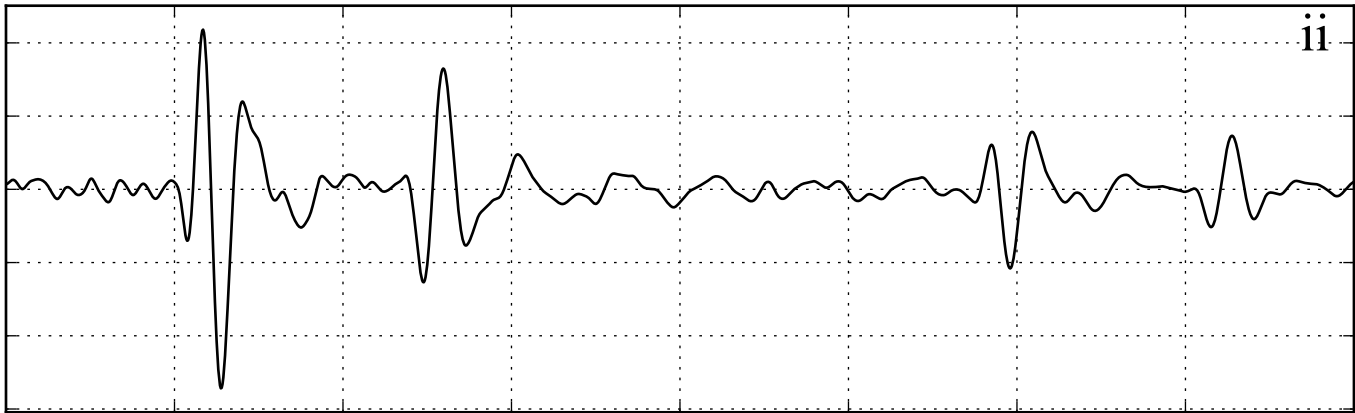

Time [s]

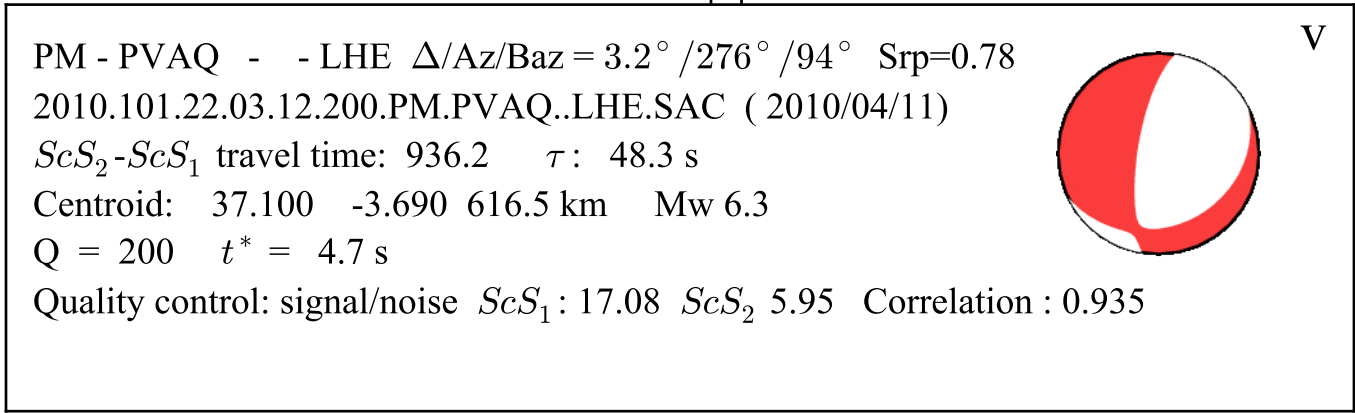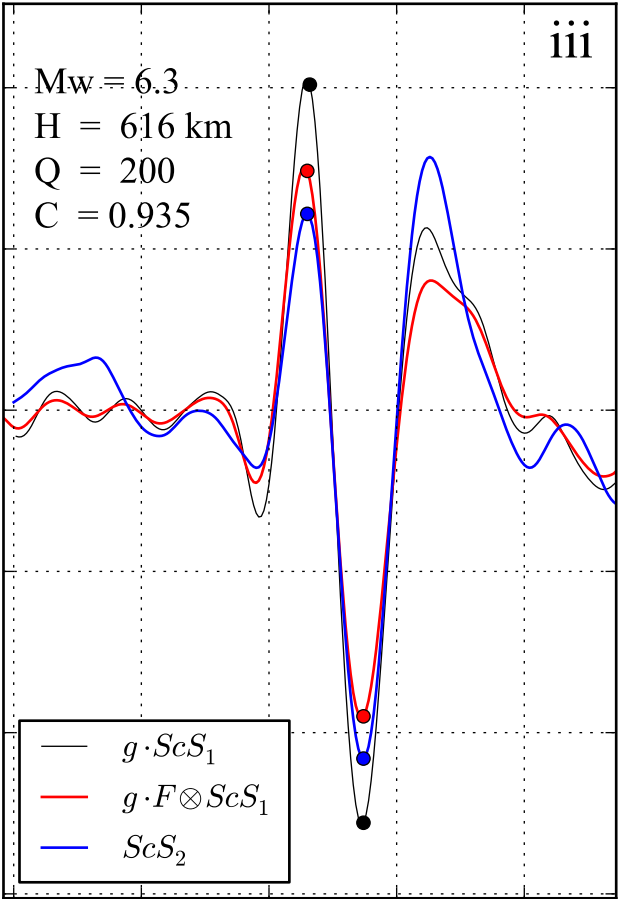

Time [s]

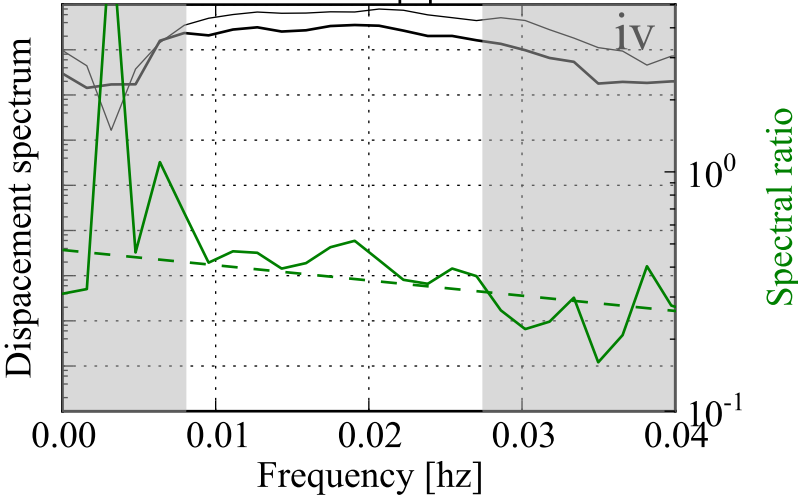

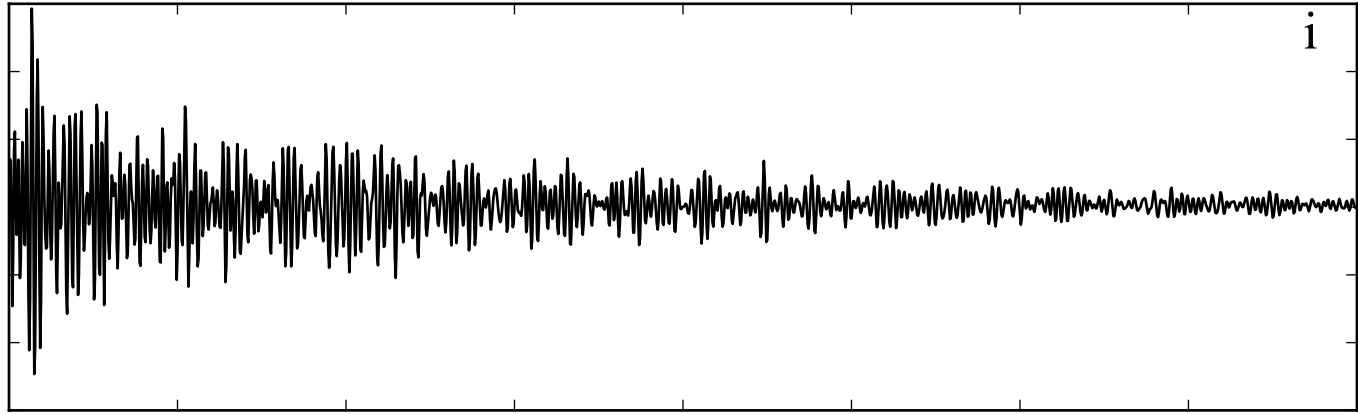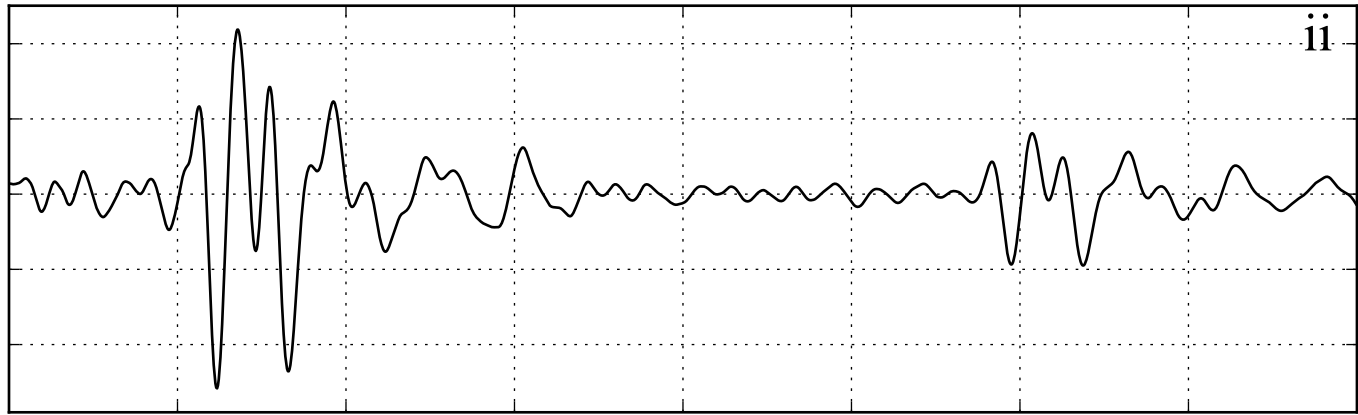

Time [s]

G - PVC - - LH2  $\Delta/Az/Baz = 1.8^\circ/339^\circ/160^\circ$  Srp=0.96  
1995.180.12.19.03.345.G.PVC..LH2.SAC ( 1995/06/29)  
 $ScS_2$ - $ScS_1$  travel time: 942.5  $\tau$ : 49.7 s  
Centroid: -19.420 168.950 142.7 km Mw 6.6  
 $Q = 188$   $t^* = 5.0$  s  
Quality control: signal/noise  $ScS_1$ : 21.68  $ScS_2$  7.89 Correlation : 0.986

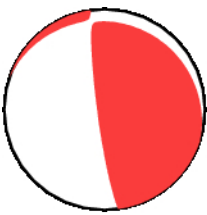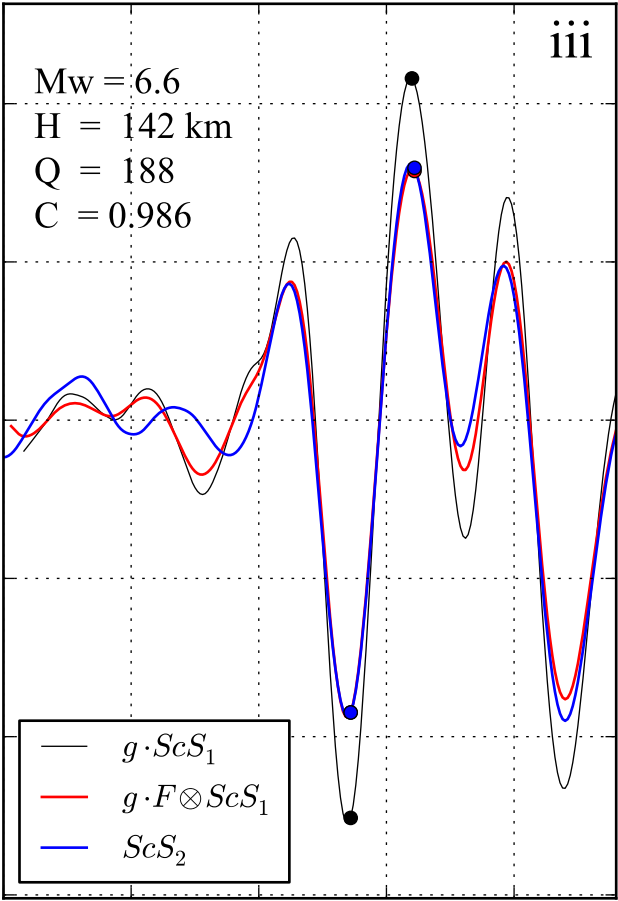

Time [s]

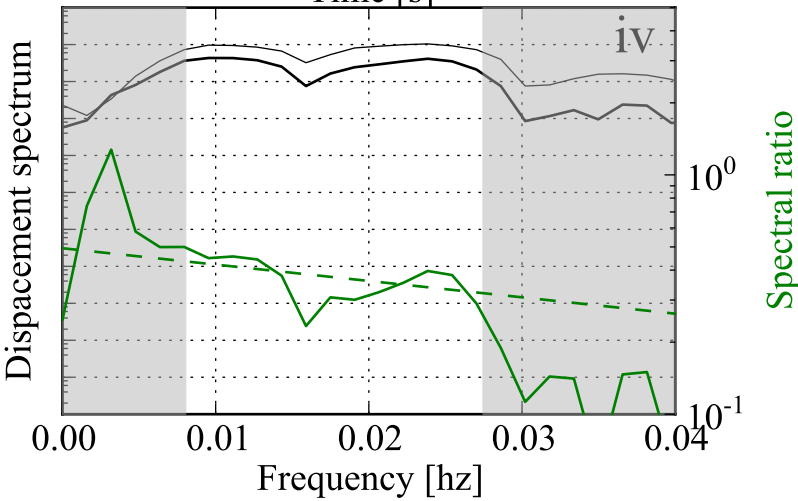

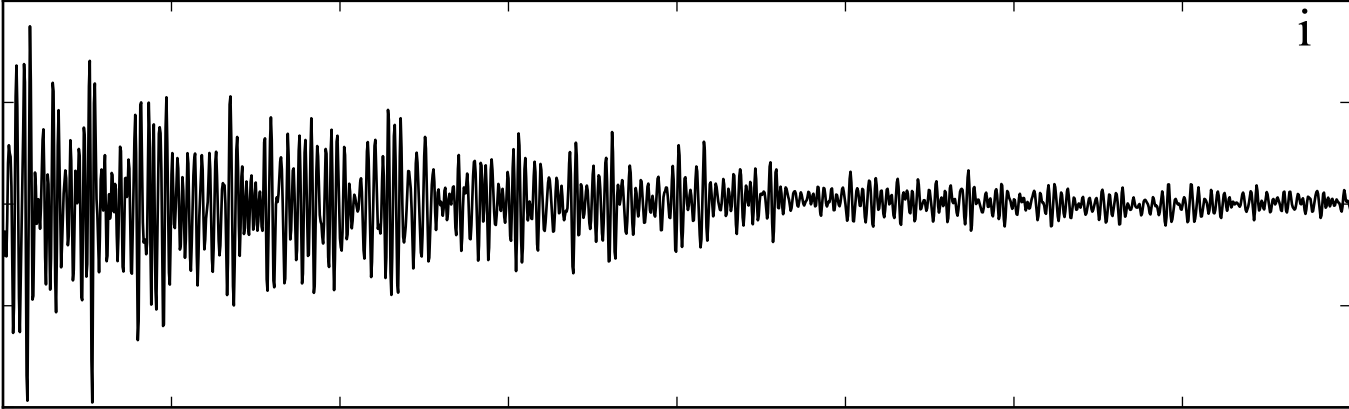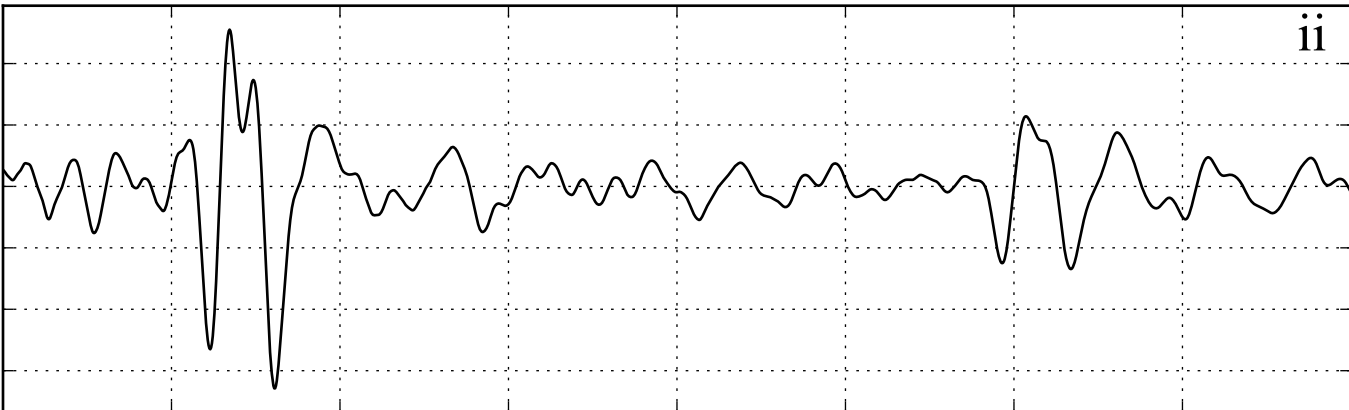

Time [s]

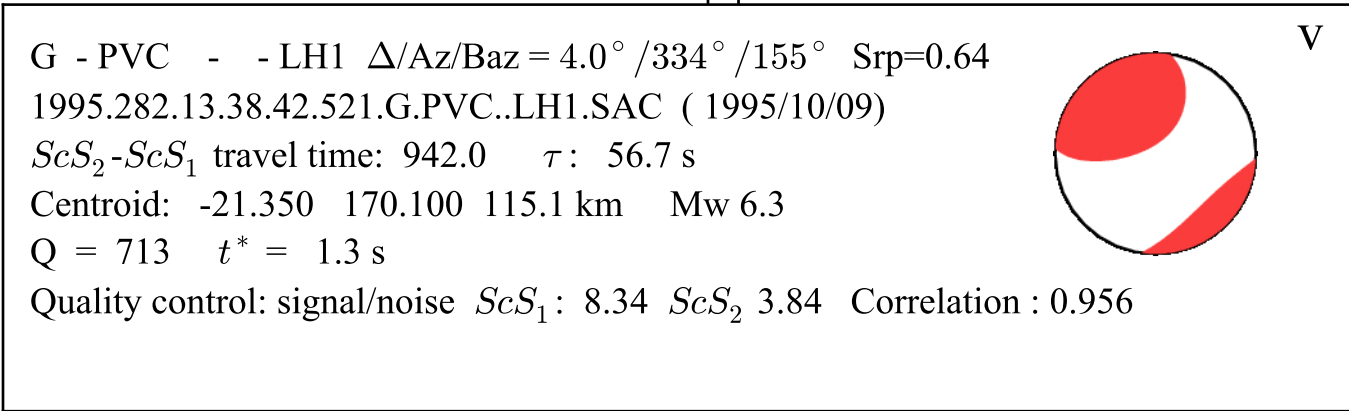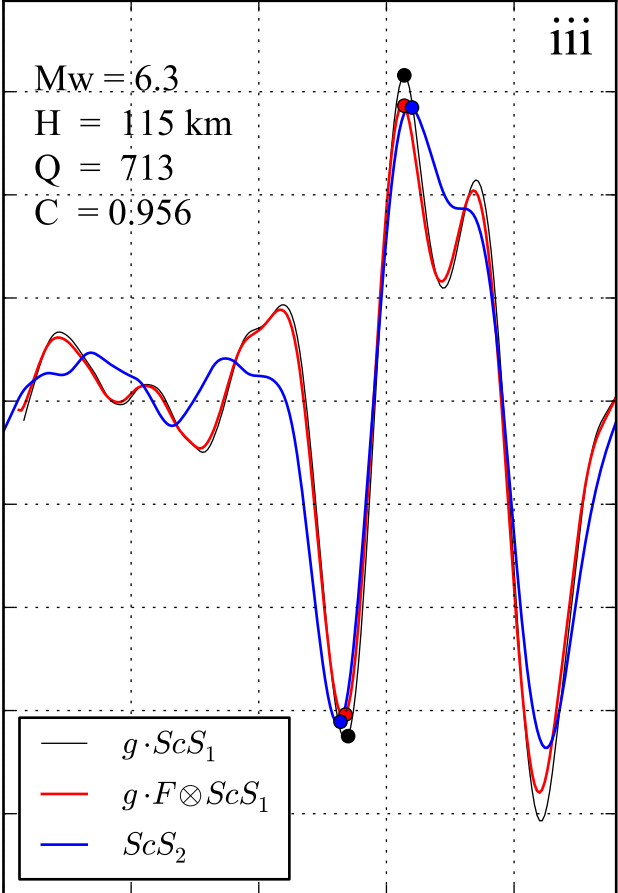

Time [s]

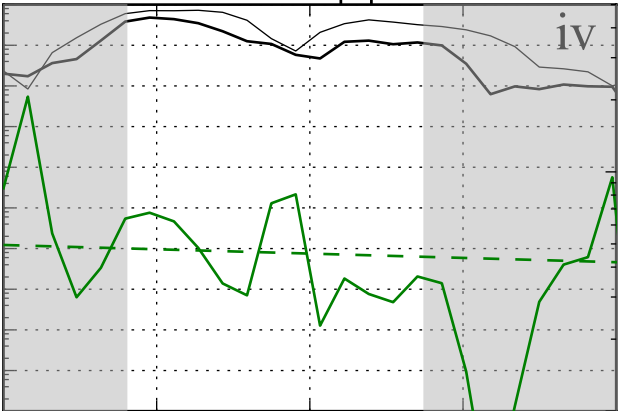

Frequency [hz]

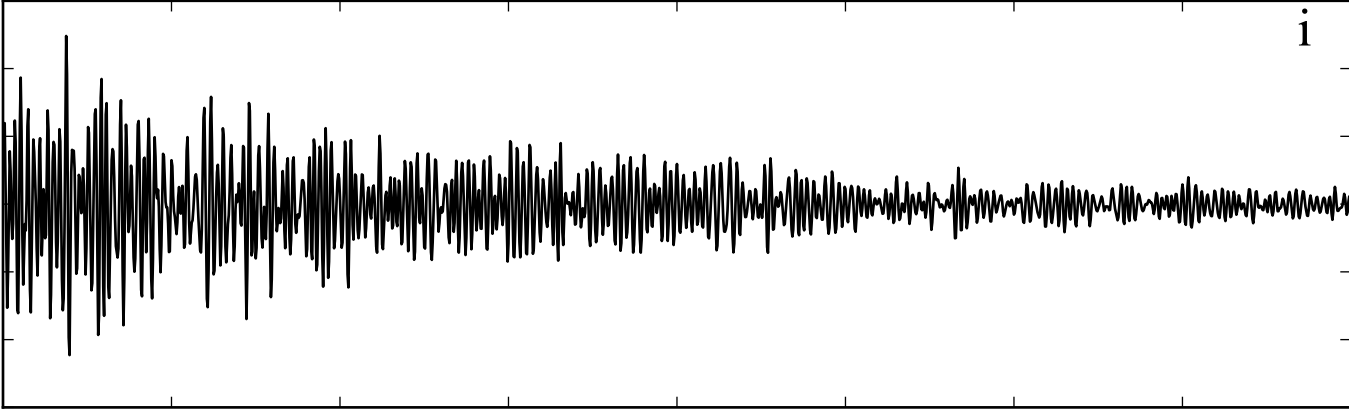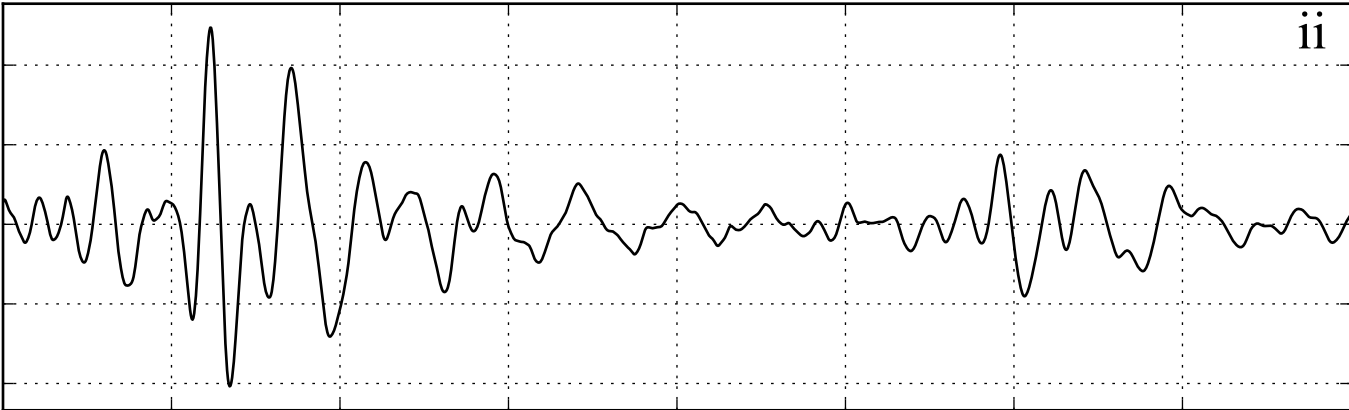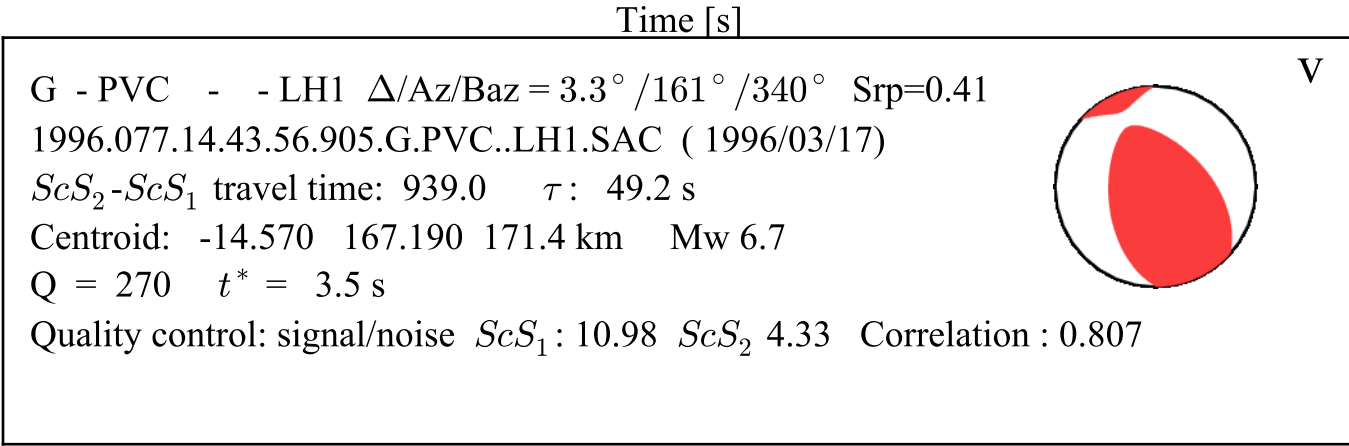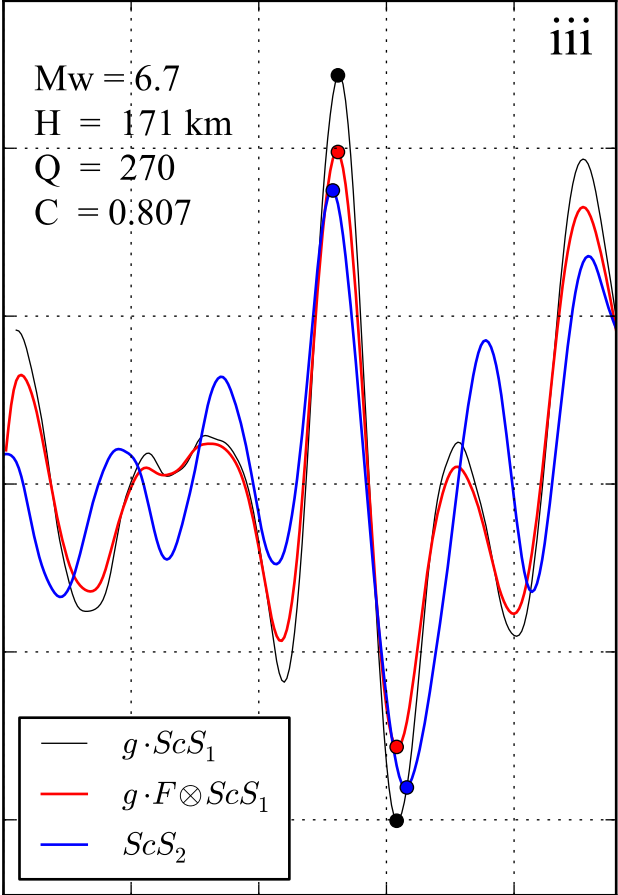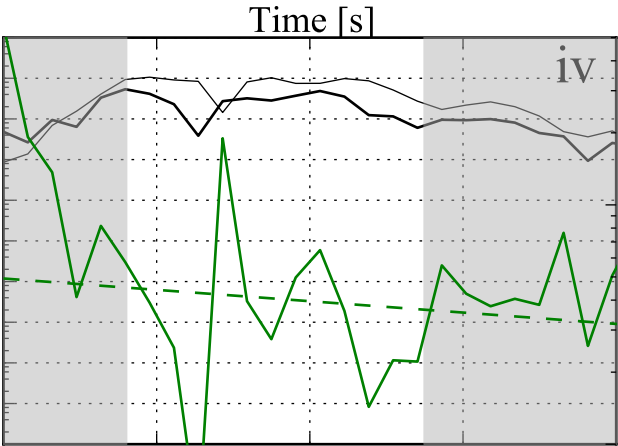

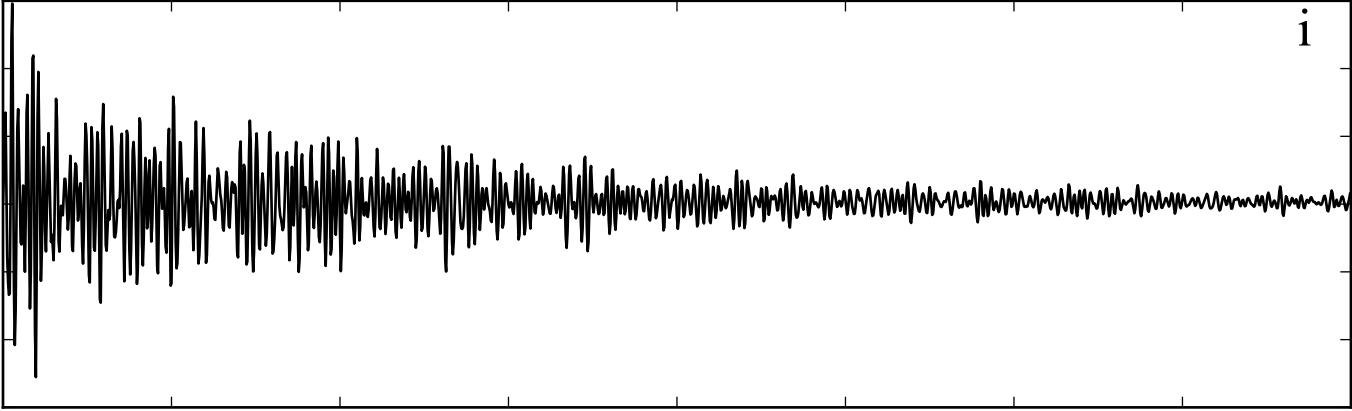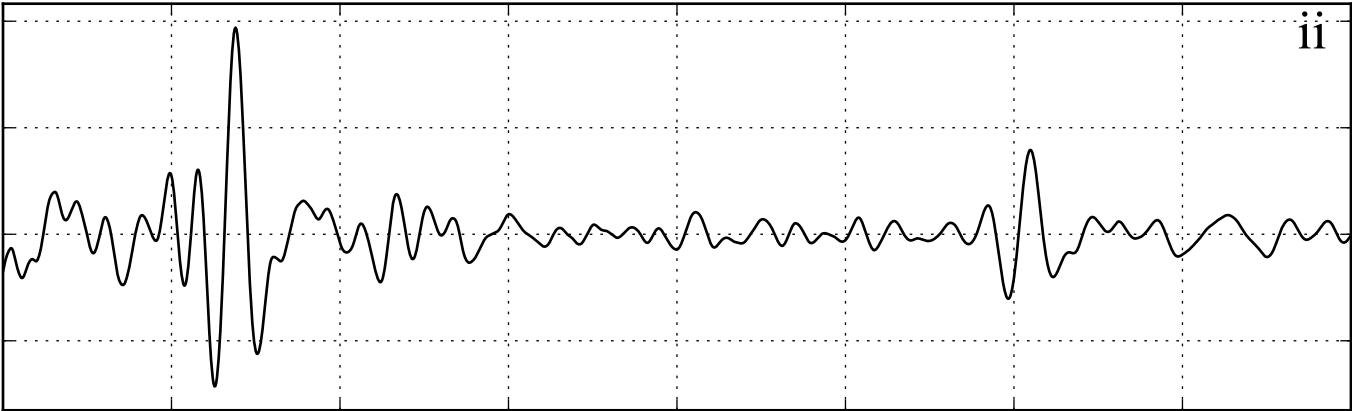

Time [s]

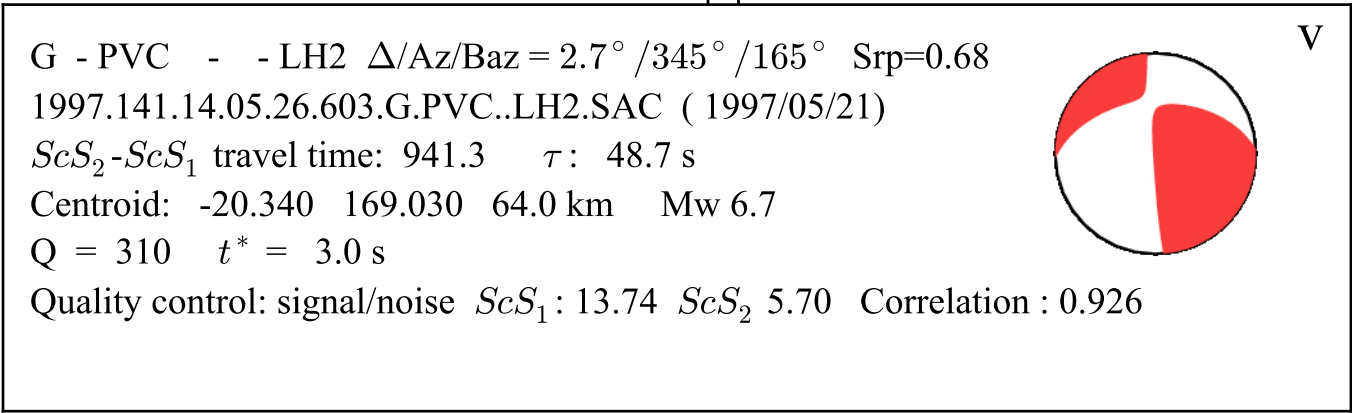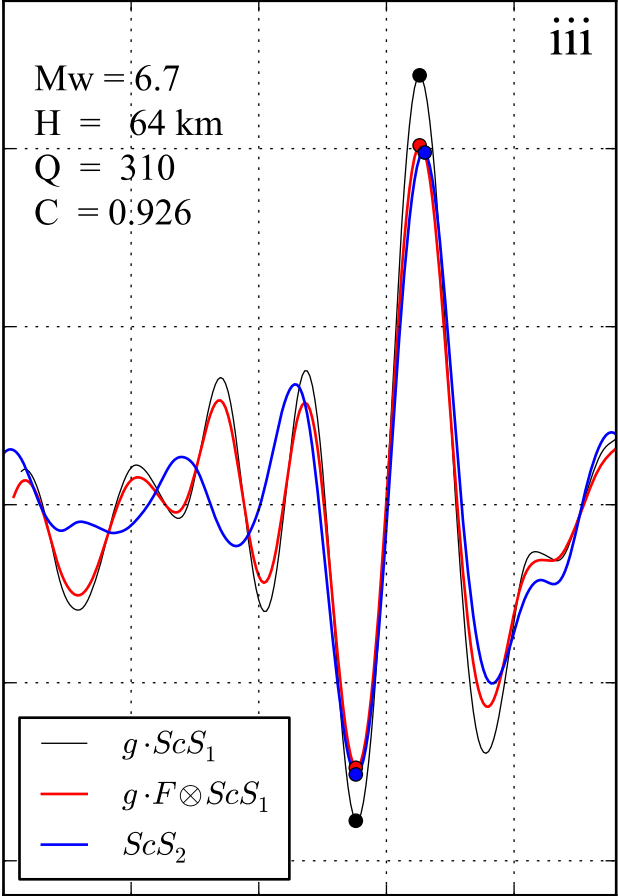

Time [s]

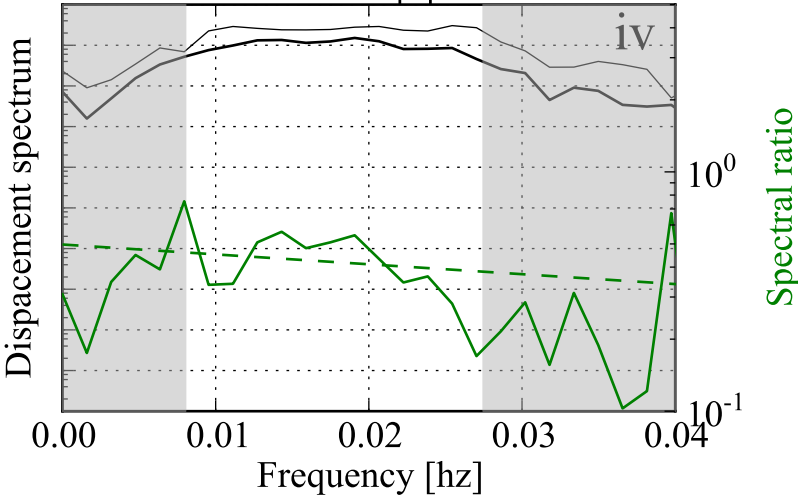

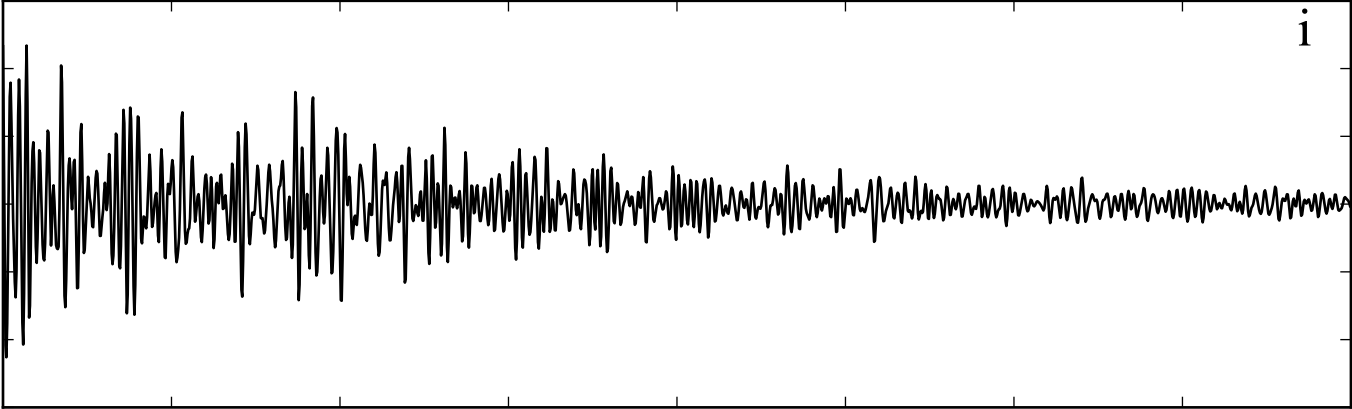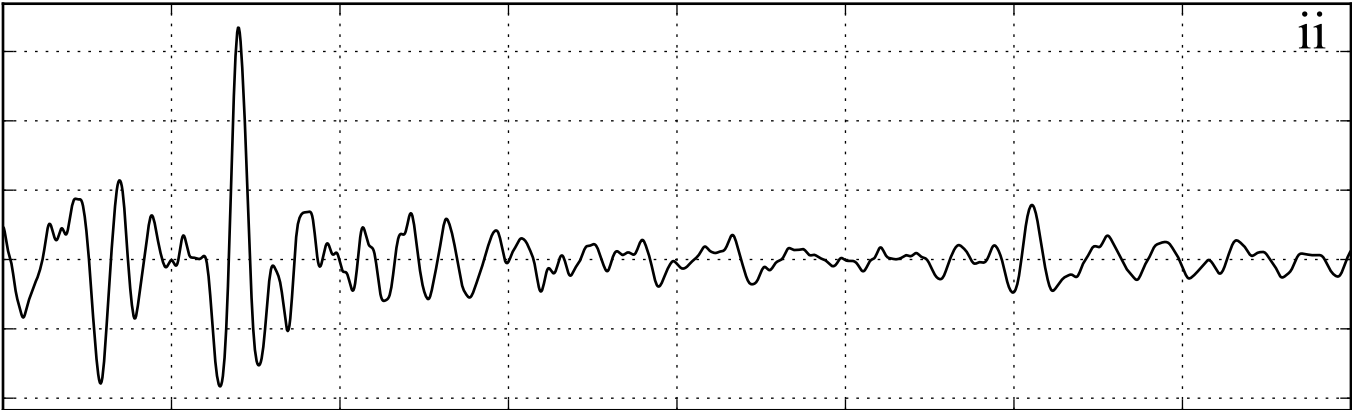

Time [s]

G - PVC - - LH2  $\Delta/Az/Baz = 4.5^\circ/341^\circ/161^\circ$  Srp=0.54

2003.361.15.55.59.022.G.PVC..LH2.SAC ( 2003/12/27)

$ScS_2$ - $ScS_1$  travel time: 941.8  $\tau$ : 48.4 s

Centroid: -21.990 169.810 23.0 km Mw 7.3

$Q = 77$   $t^* = 12.2$  s

Quality control: signal/noise  $ScS_1$ : 13.79  $ScS_2$  3.37 Correlation : 0.872

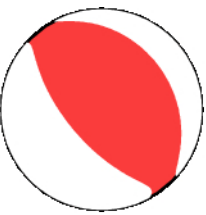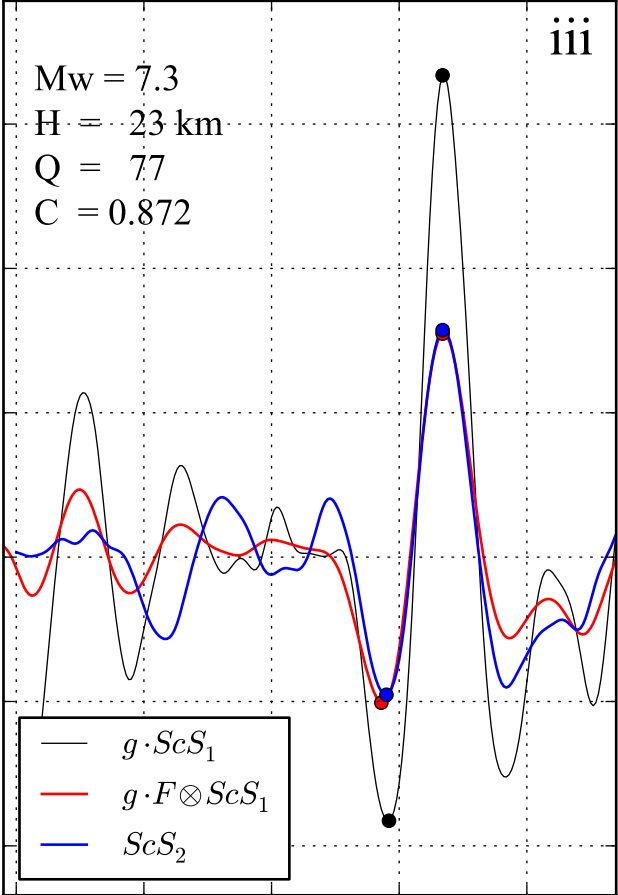

Time [s]

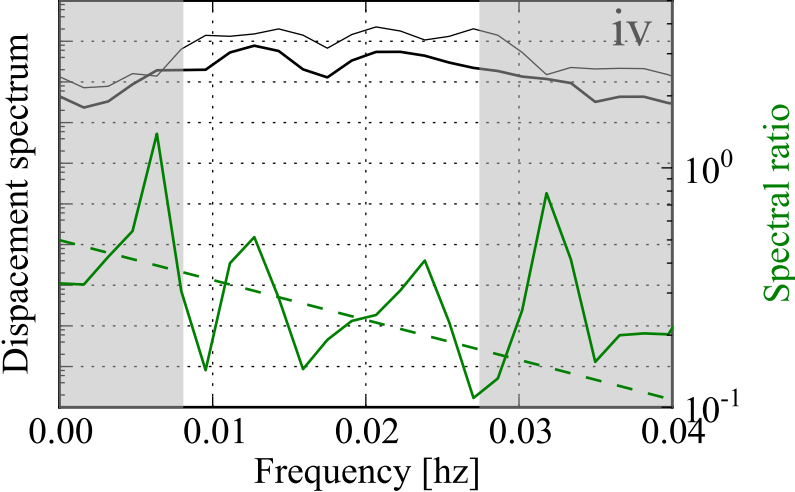

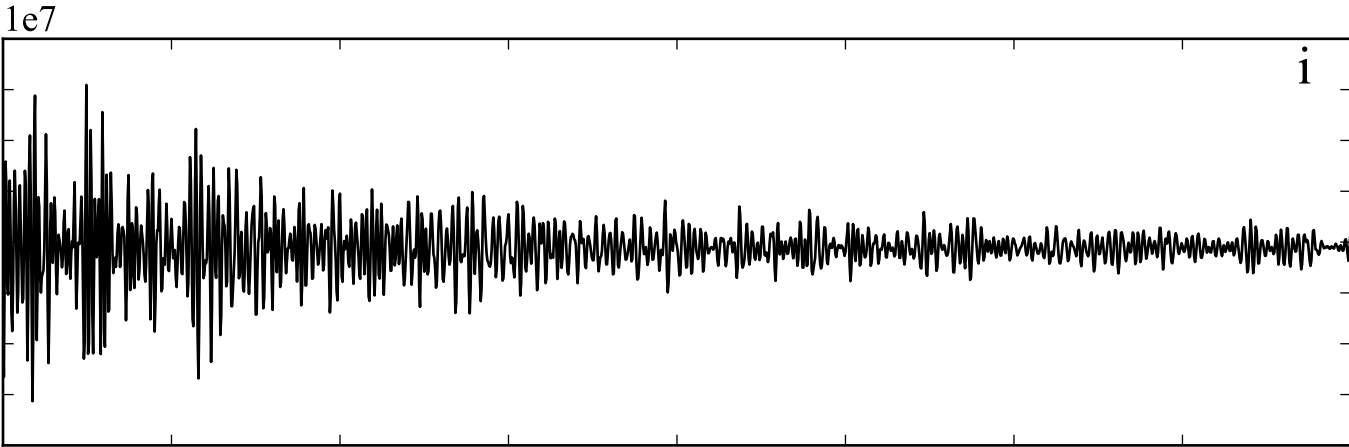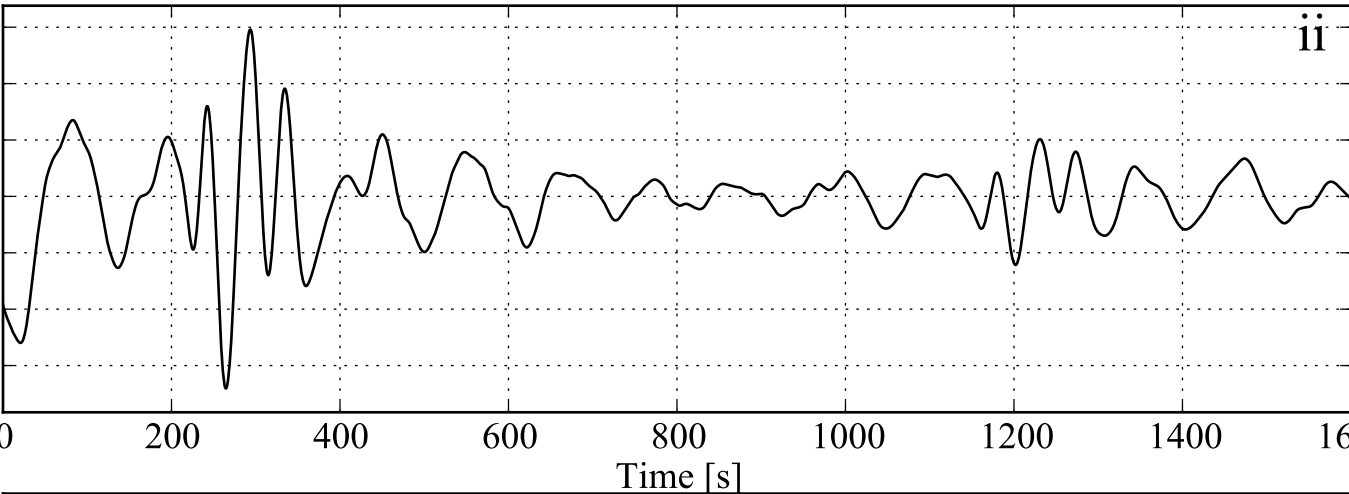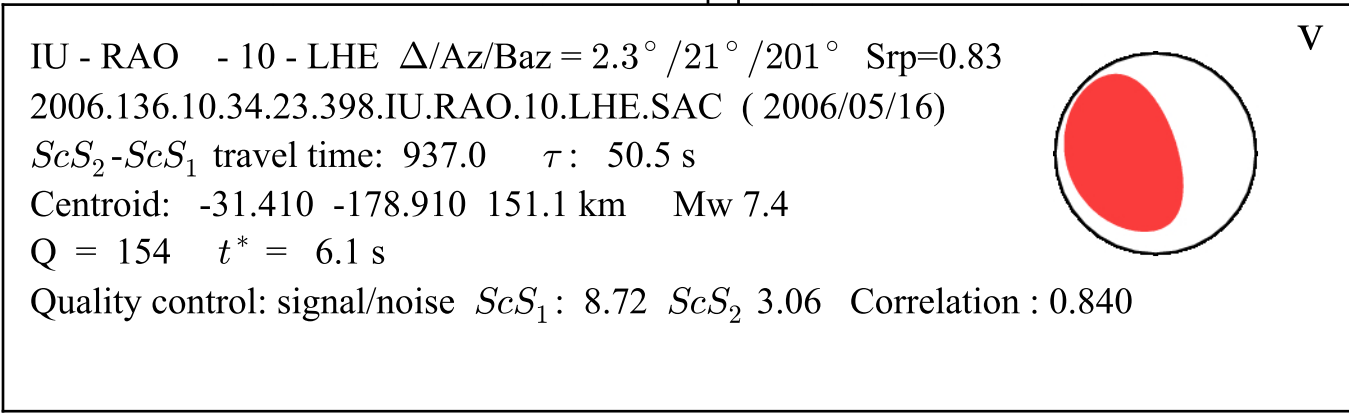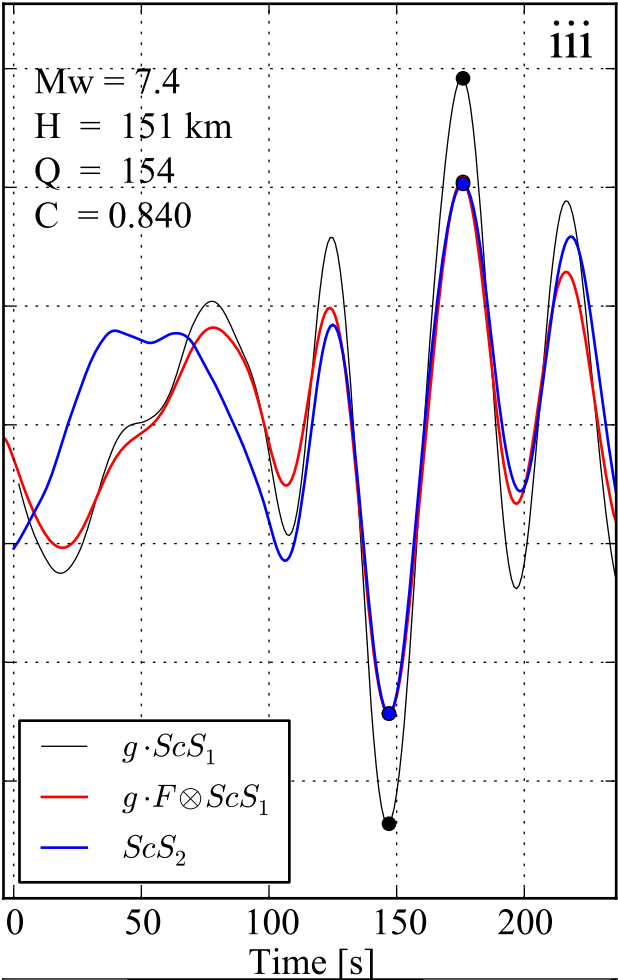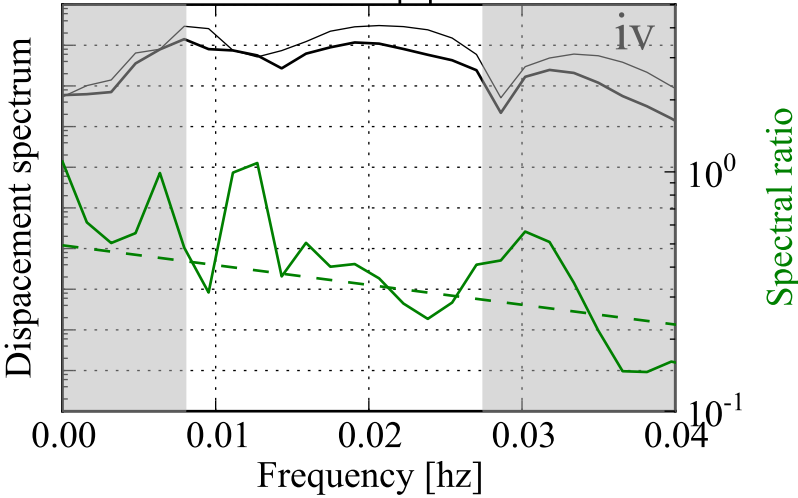



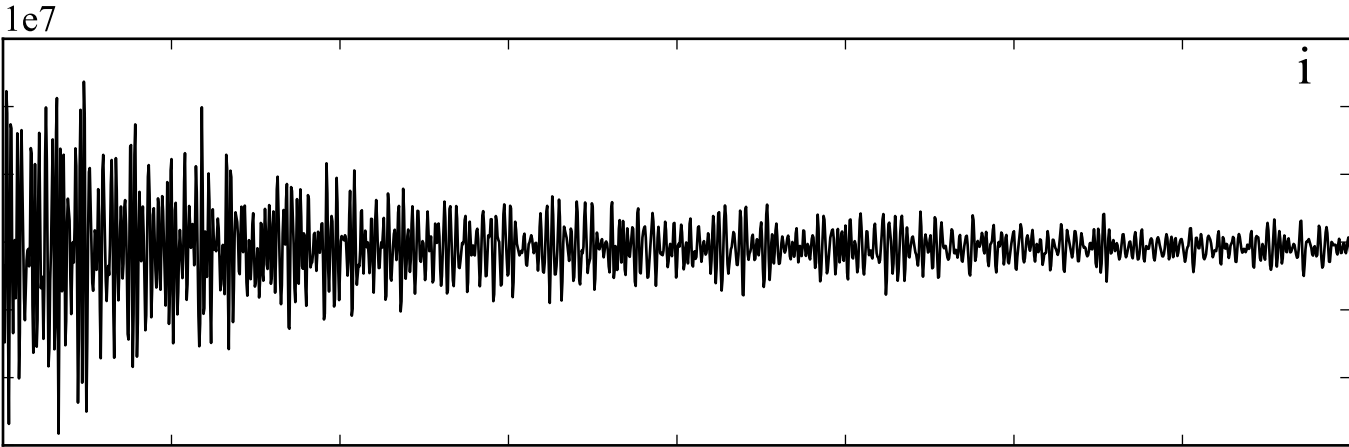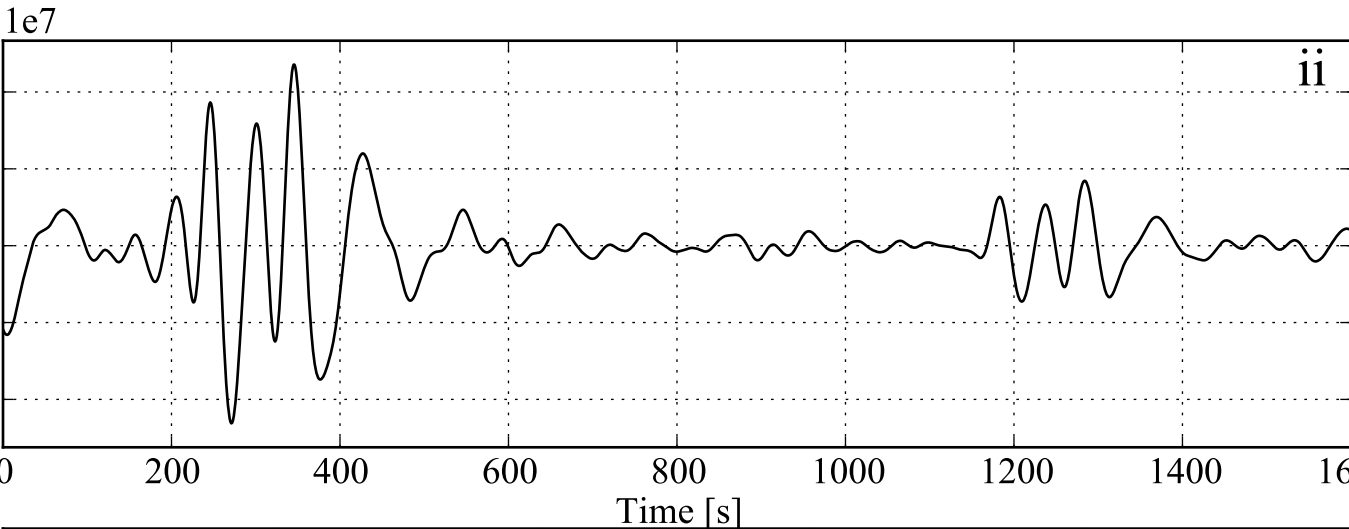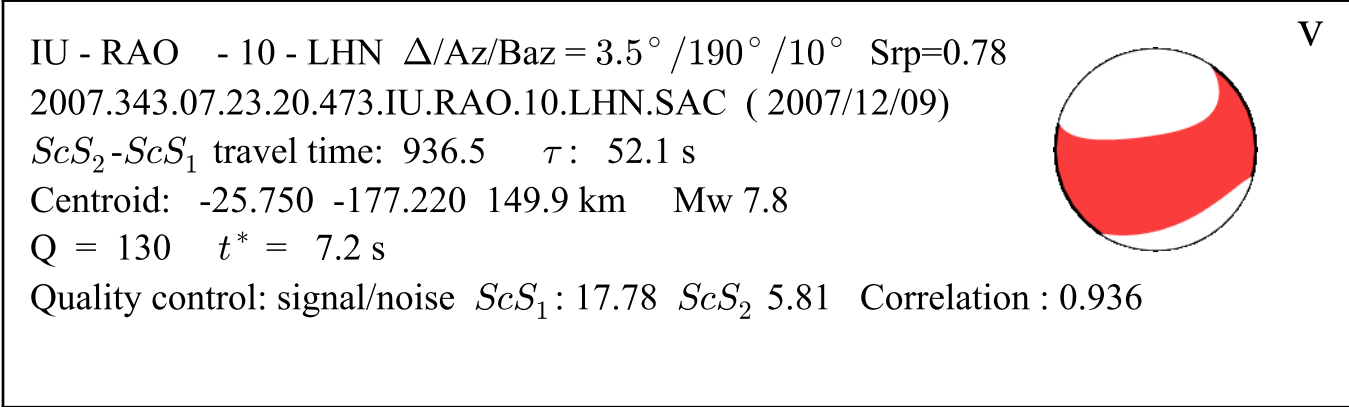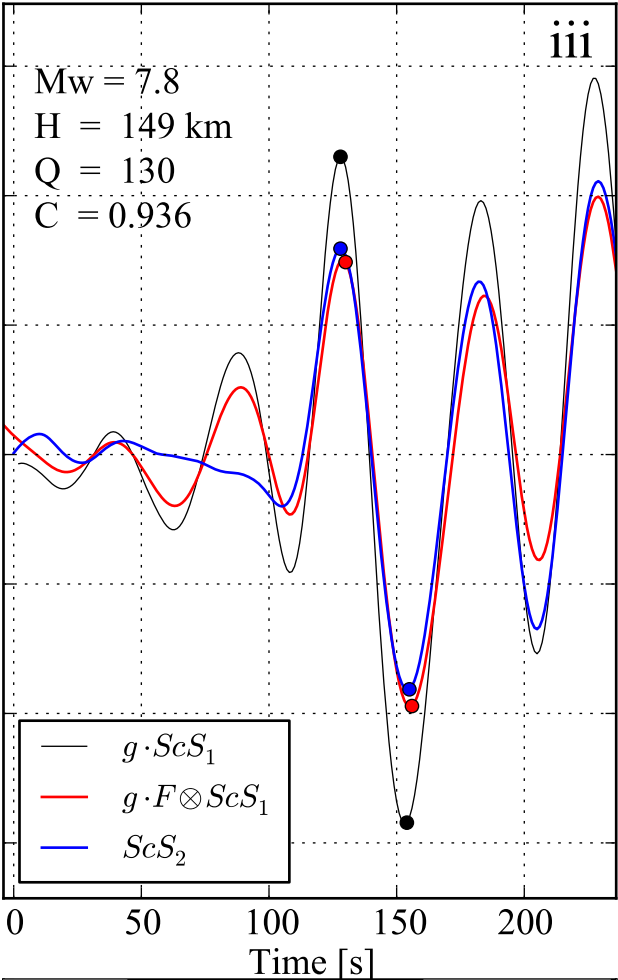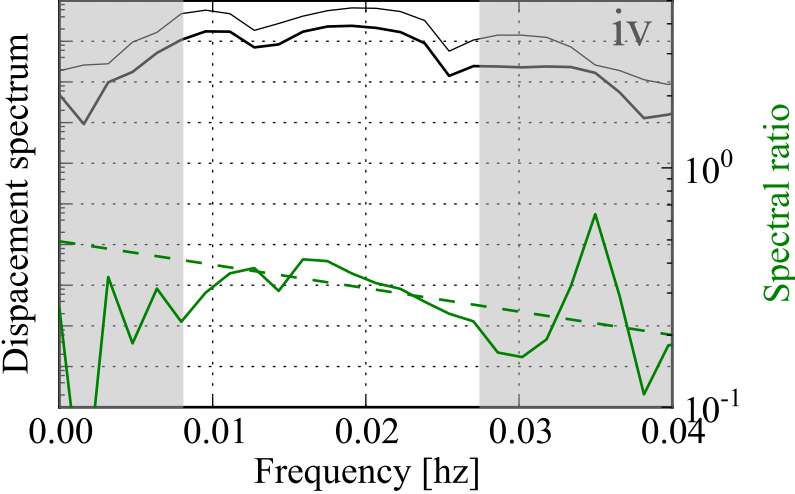

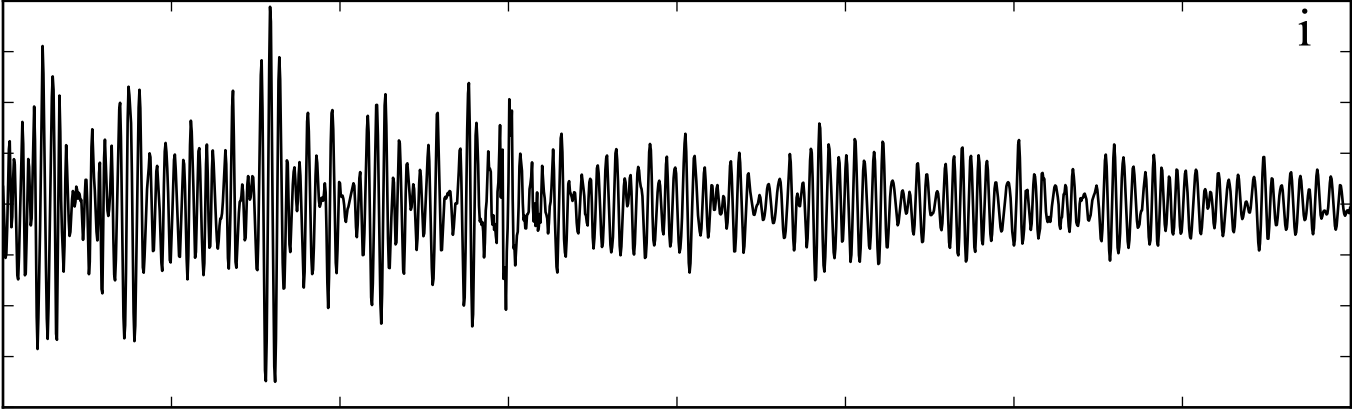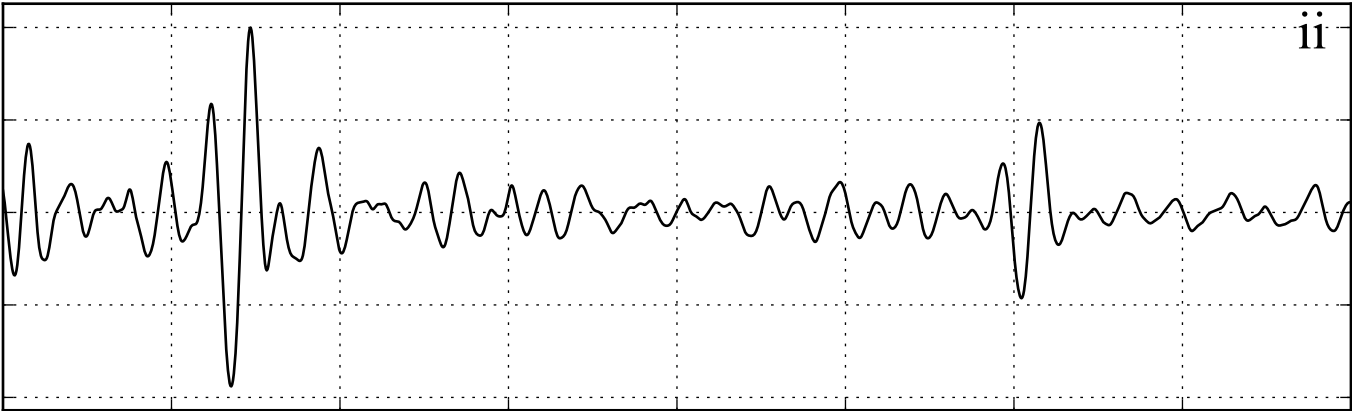

Time [s]

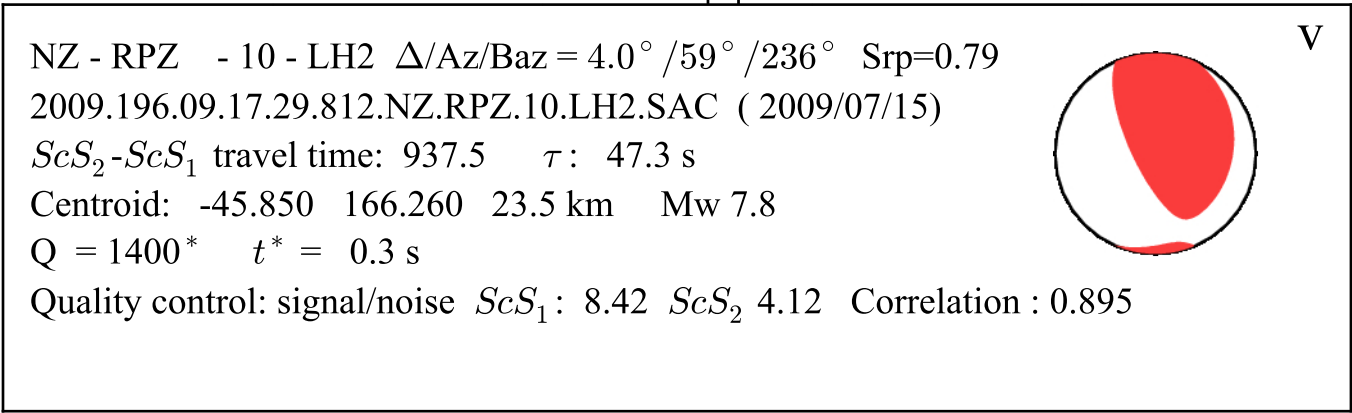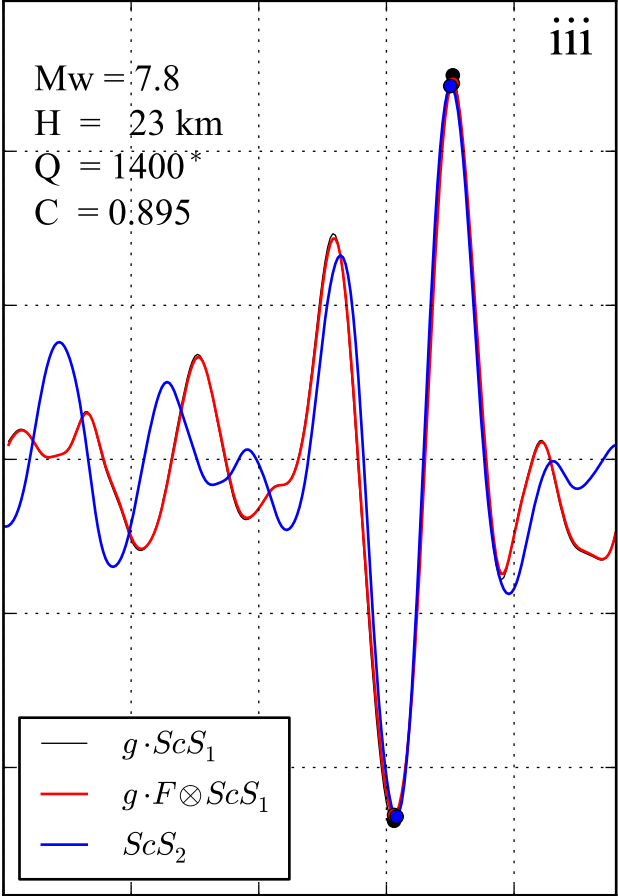

Time [s]

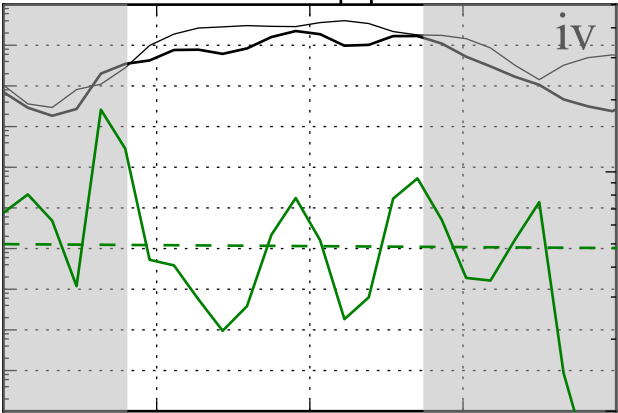

Frequency [hz]

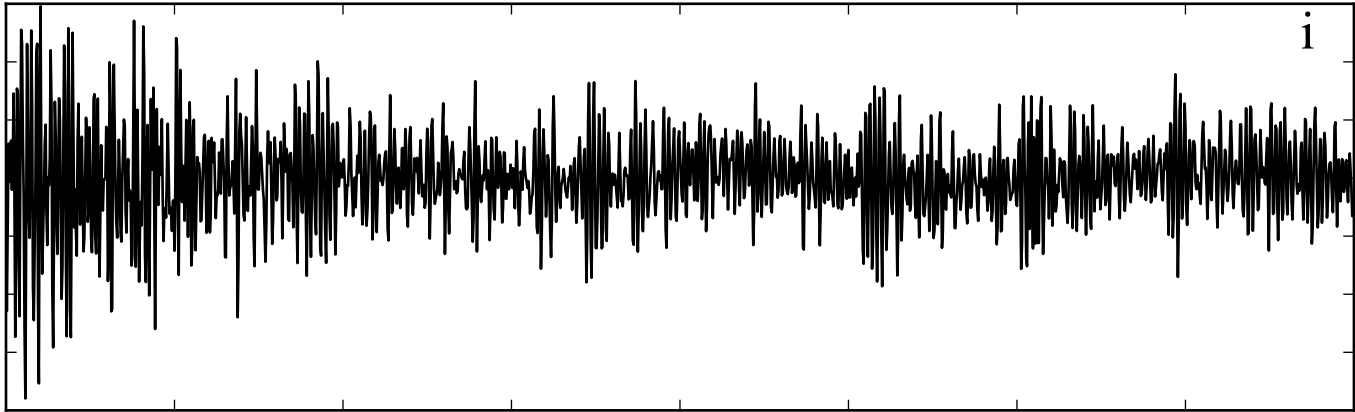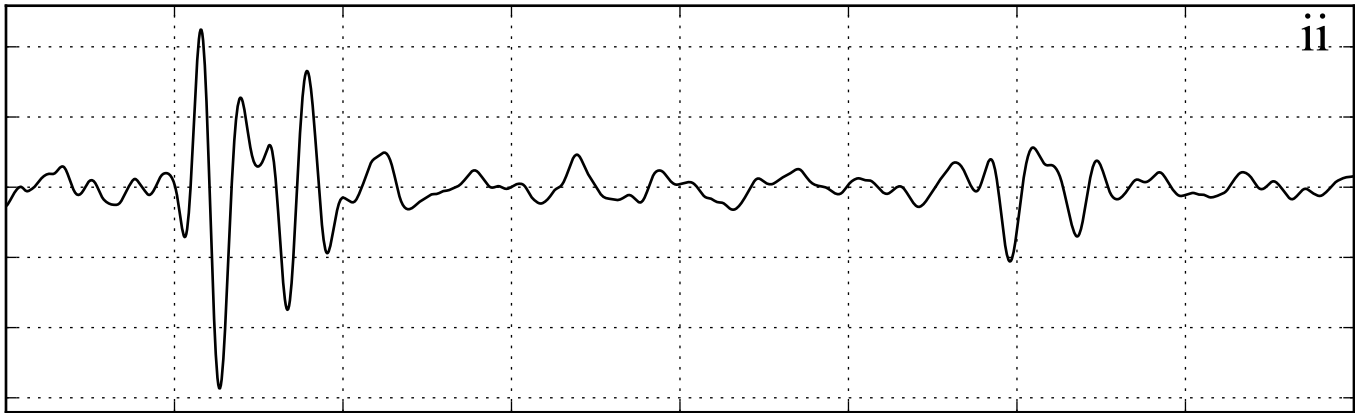

Time [s]

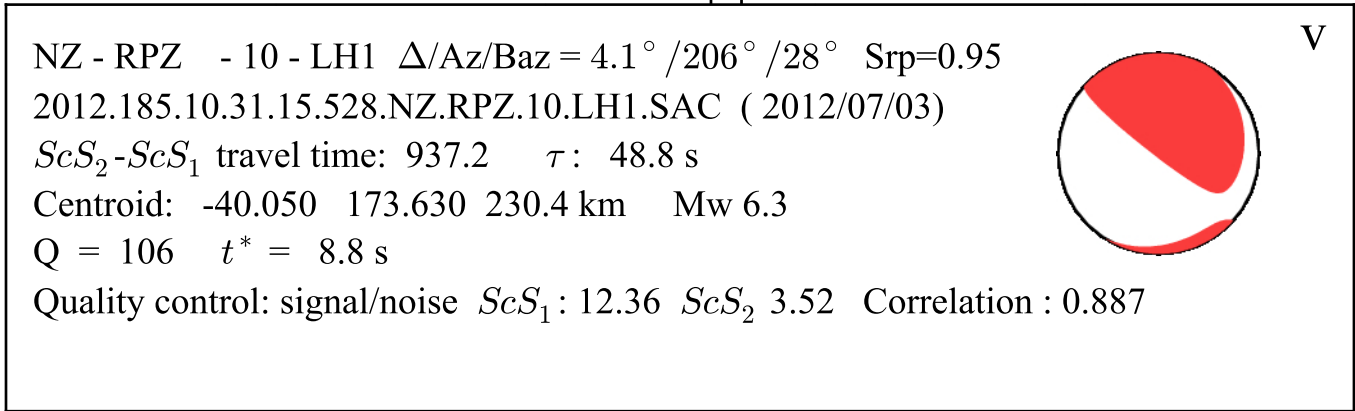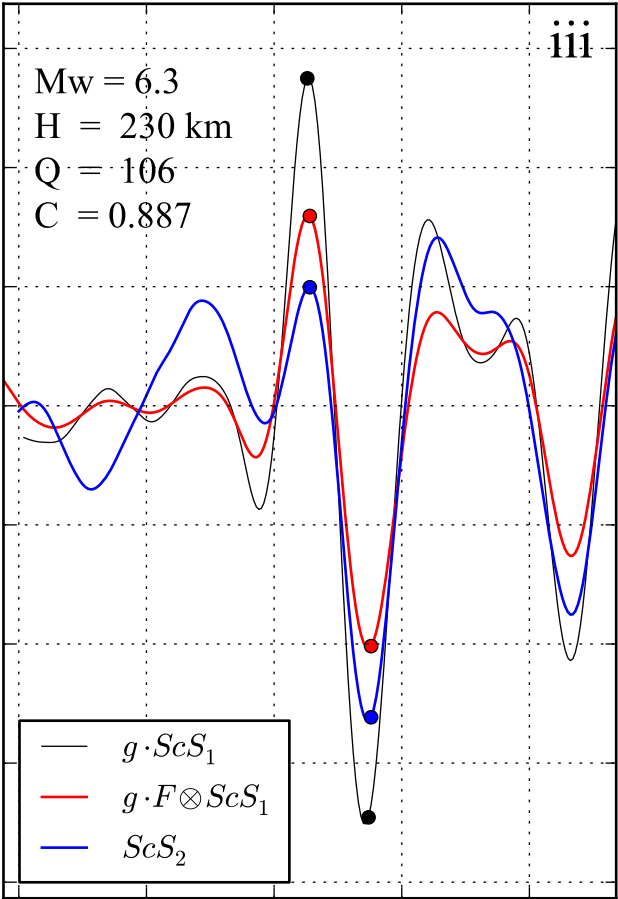

Time [s]

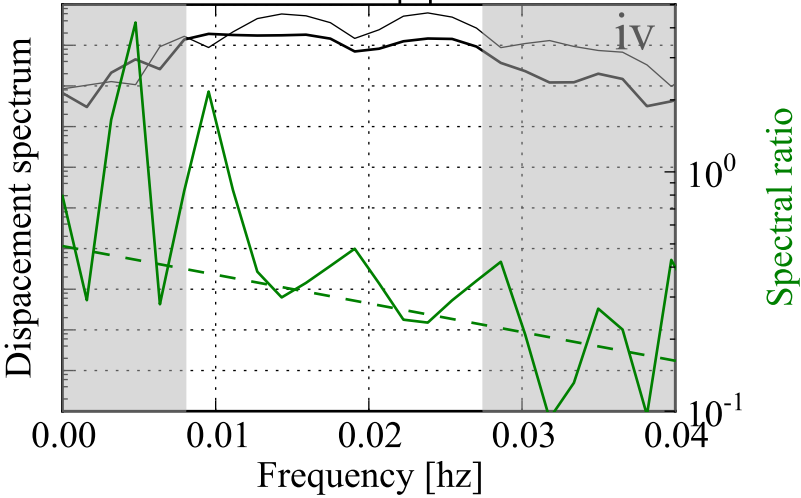

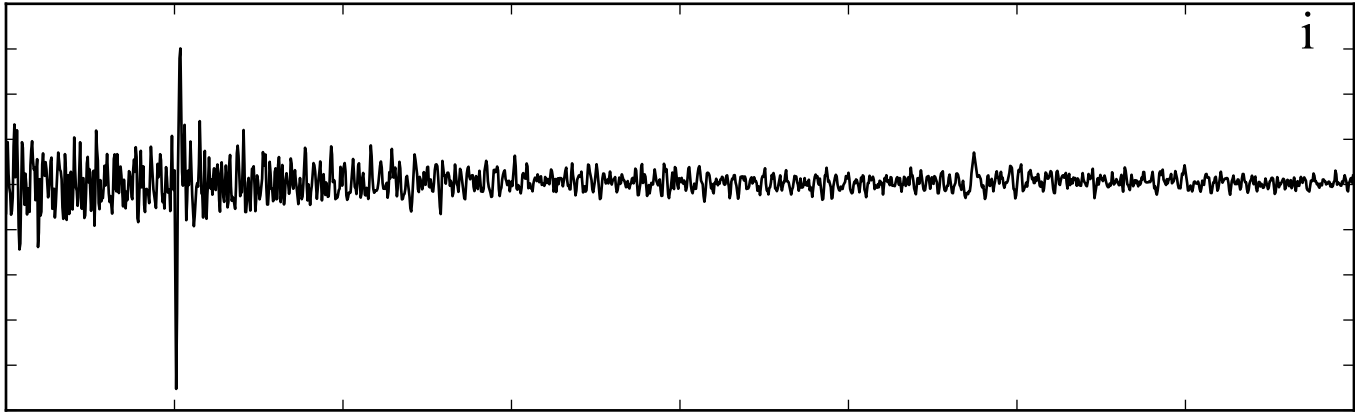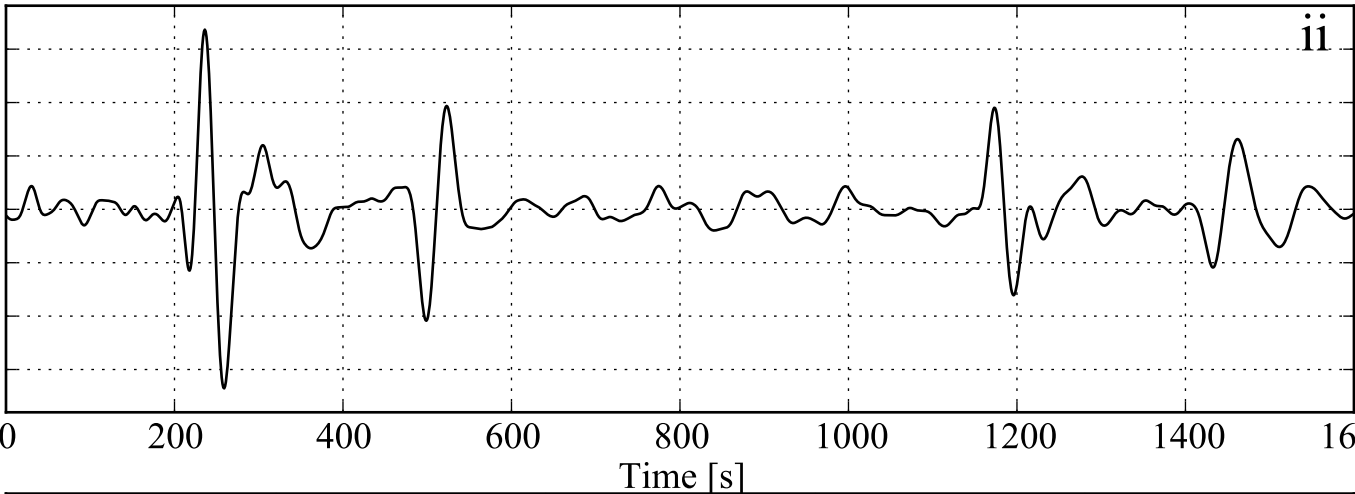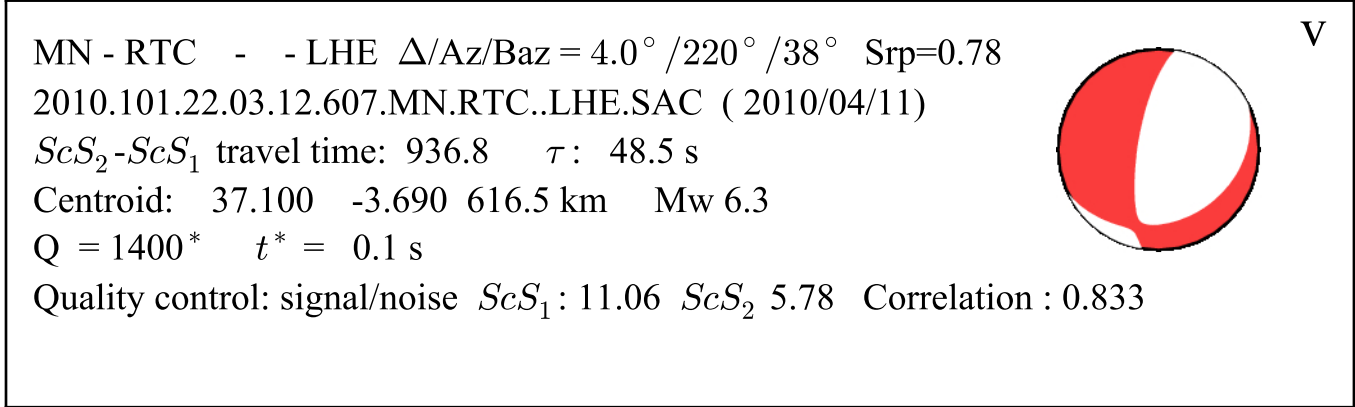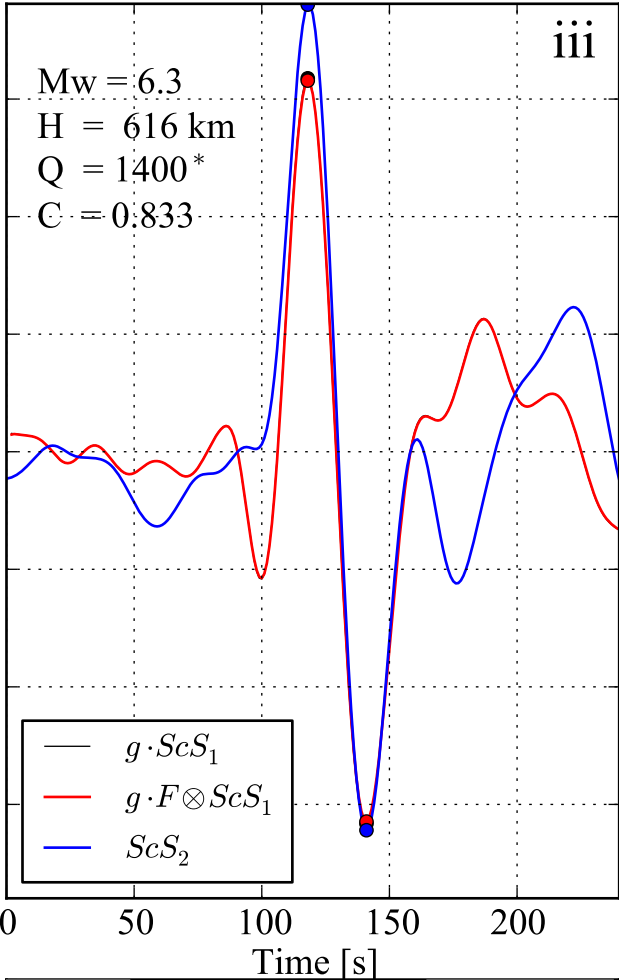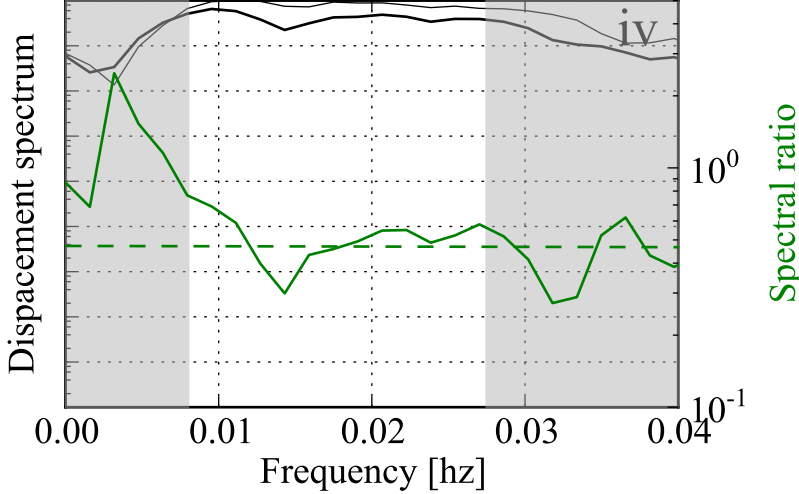

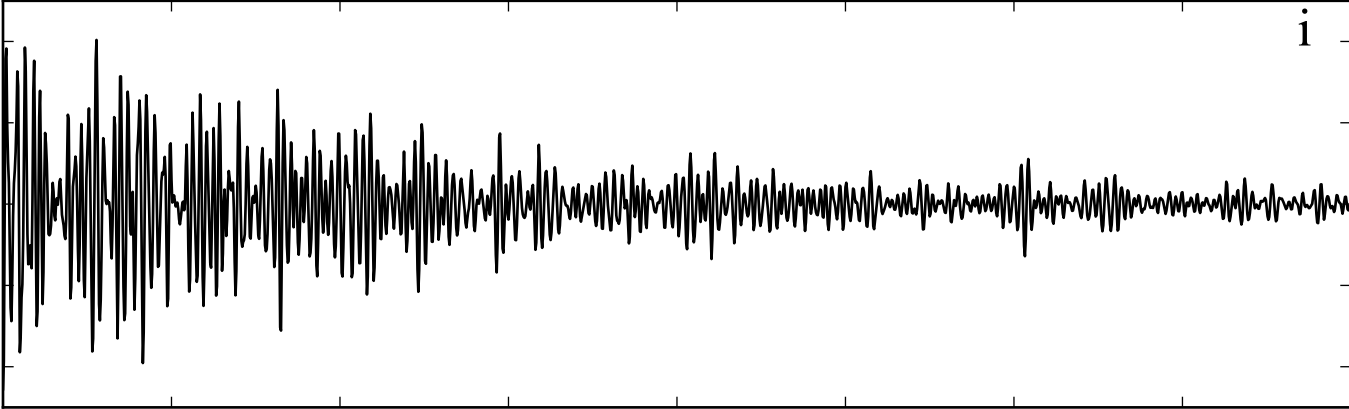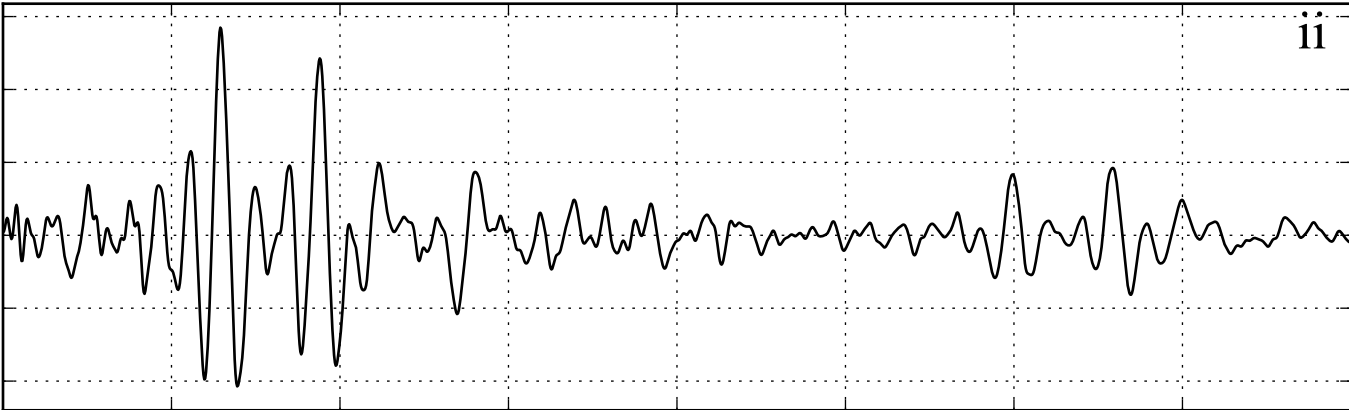

Time [s]

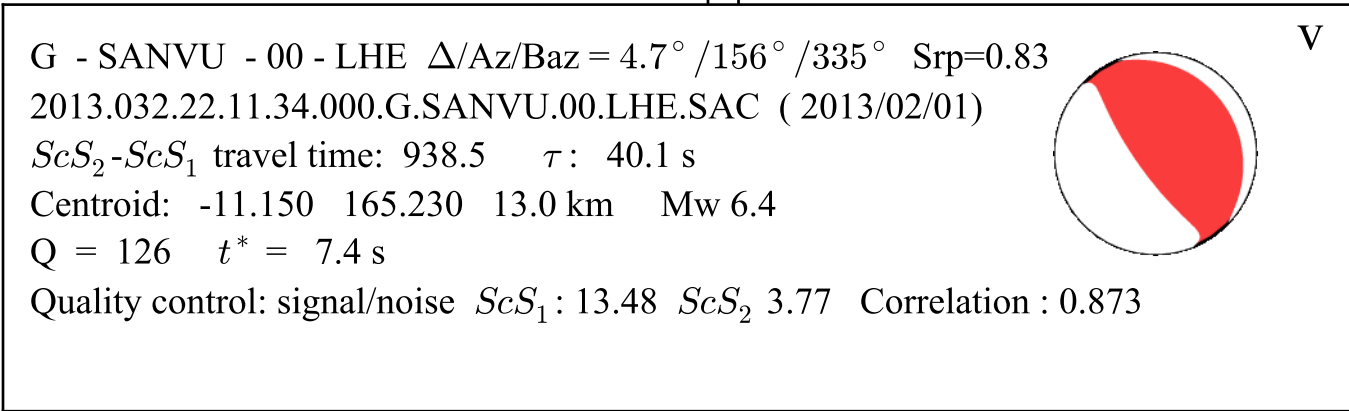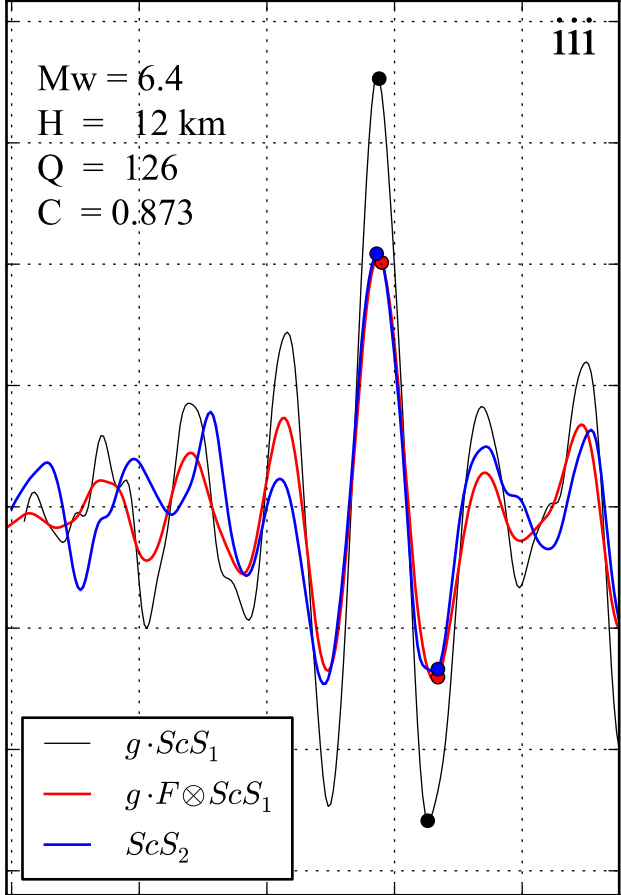

Time [s]

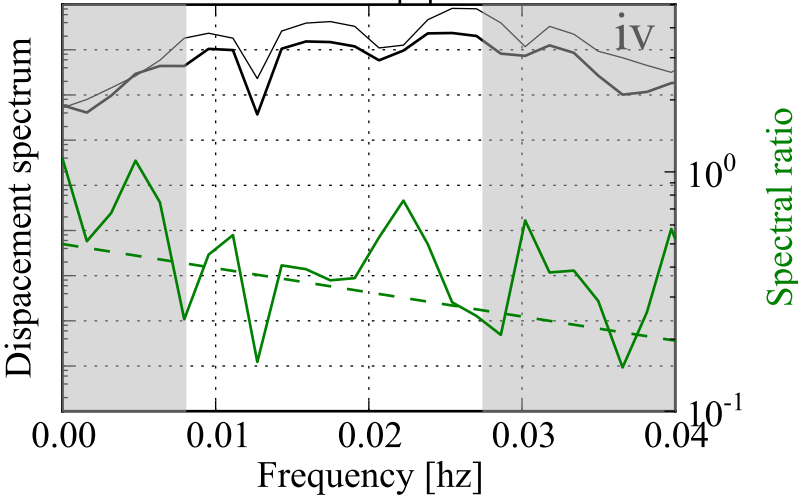

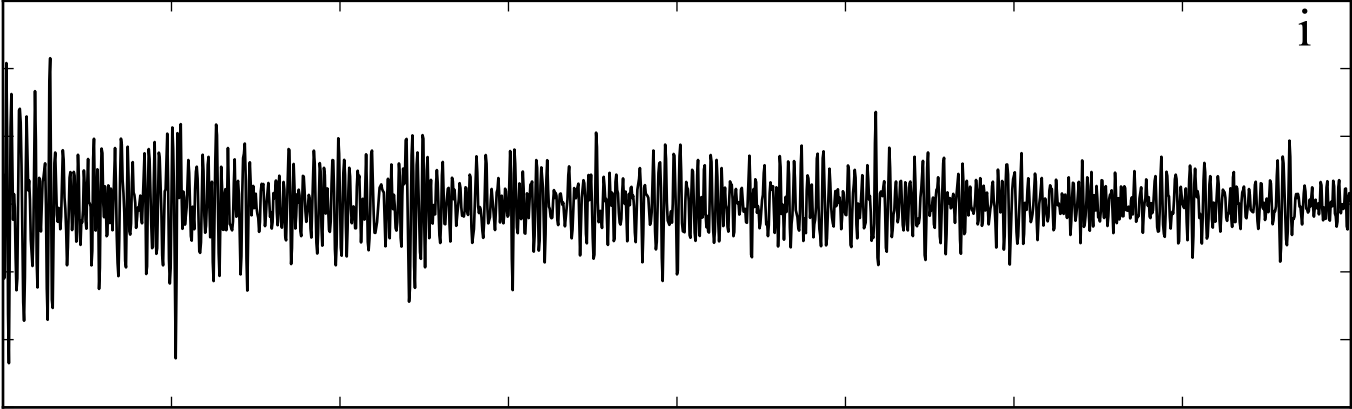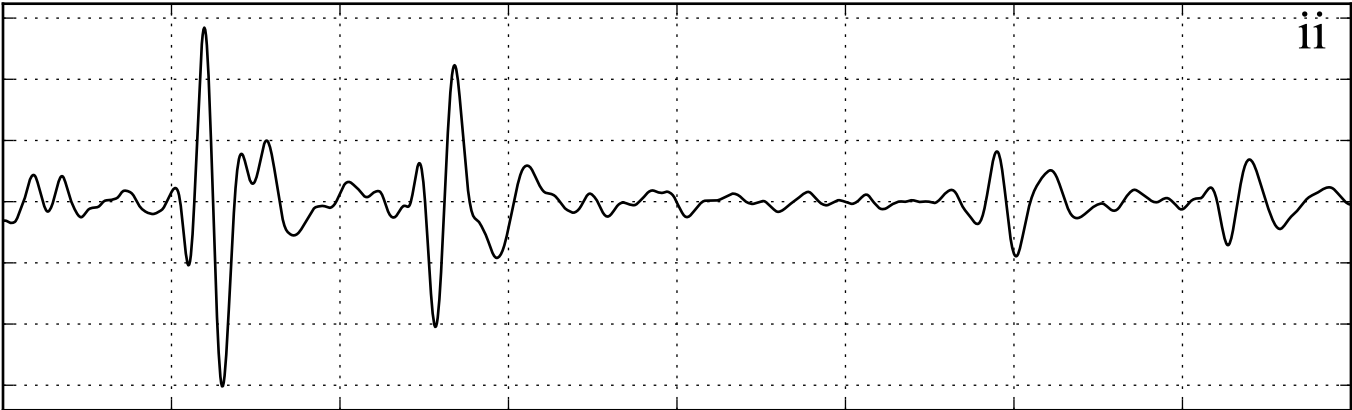

Time [s]

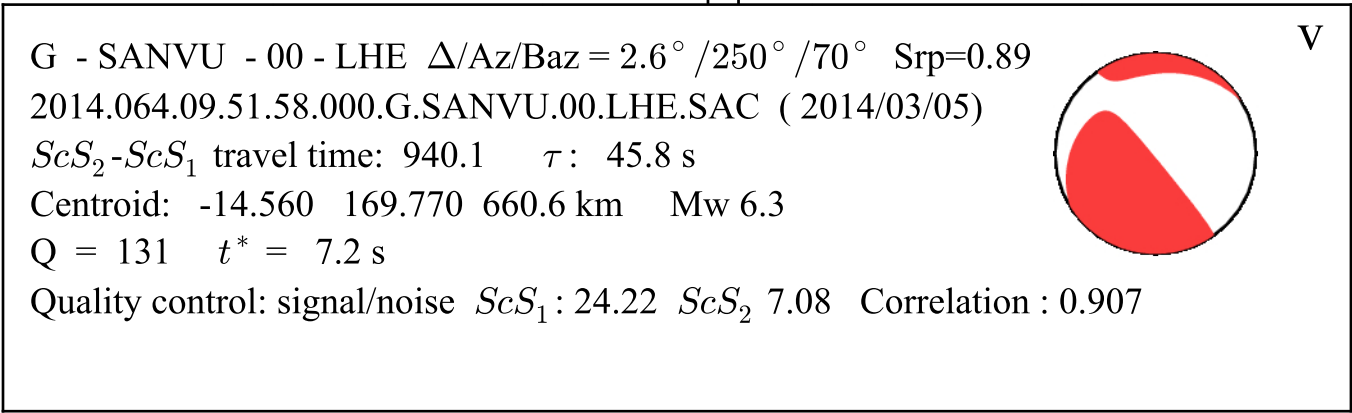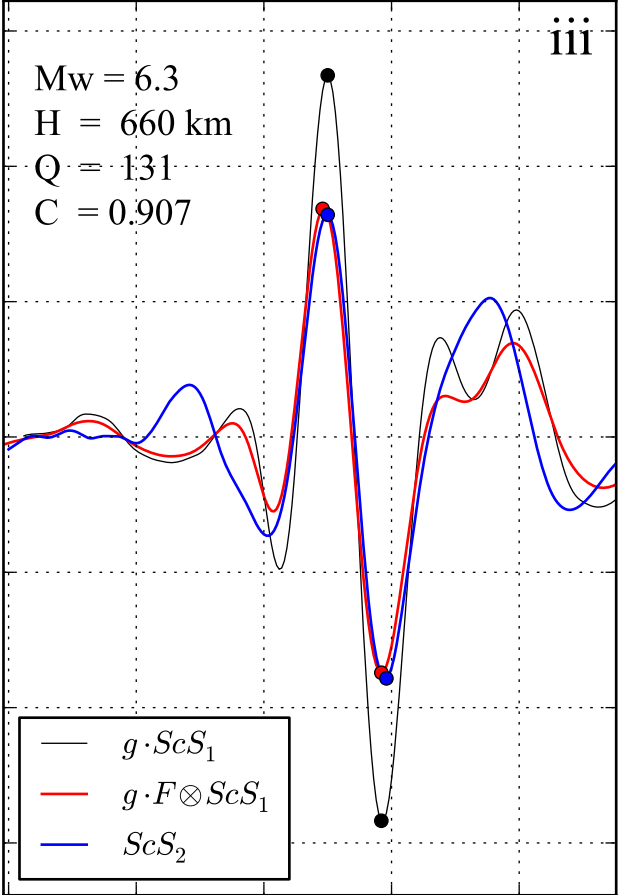

Time [s]

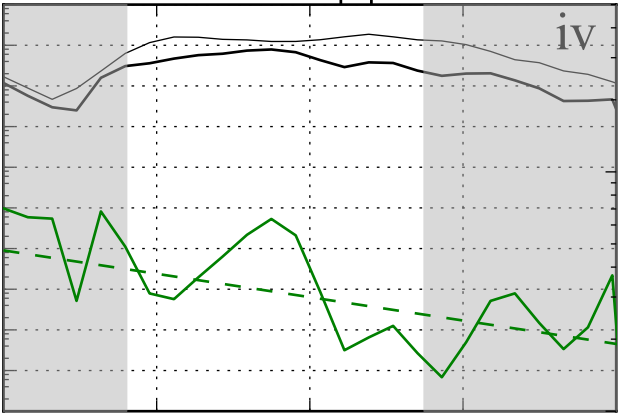

Frequency [hz]

Spectral ratio

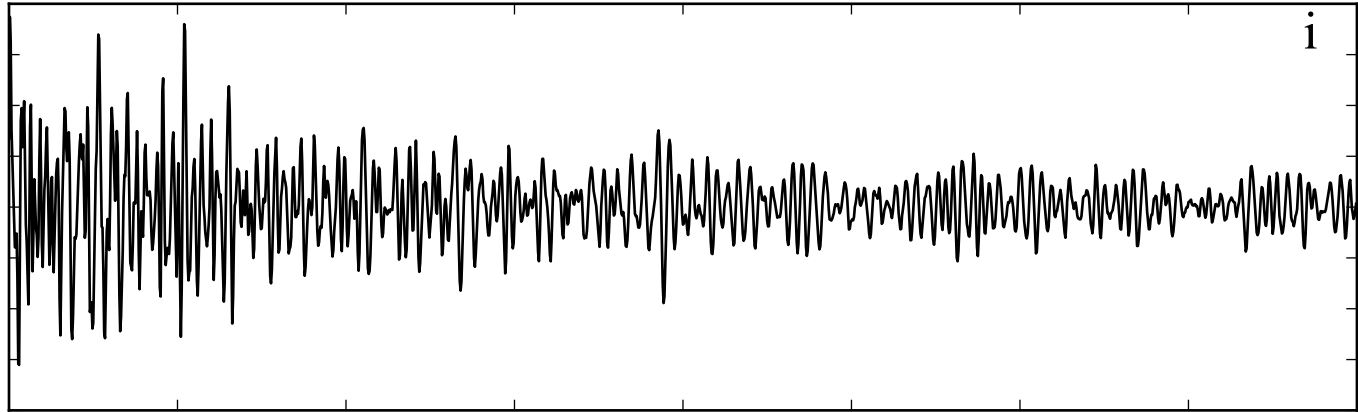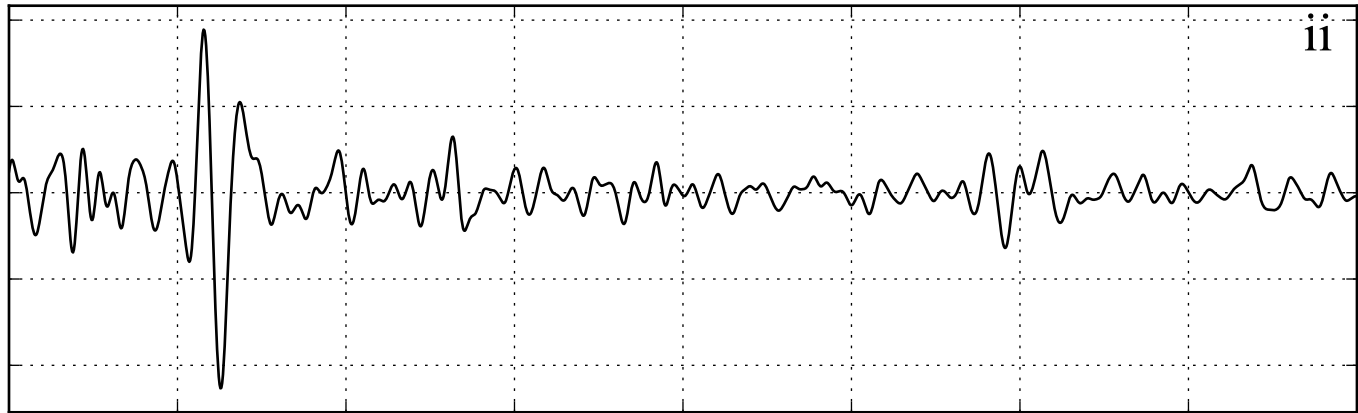

Time [s]

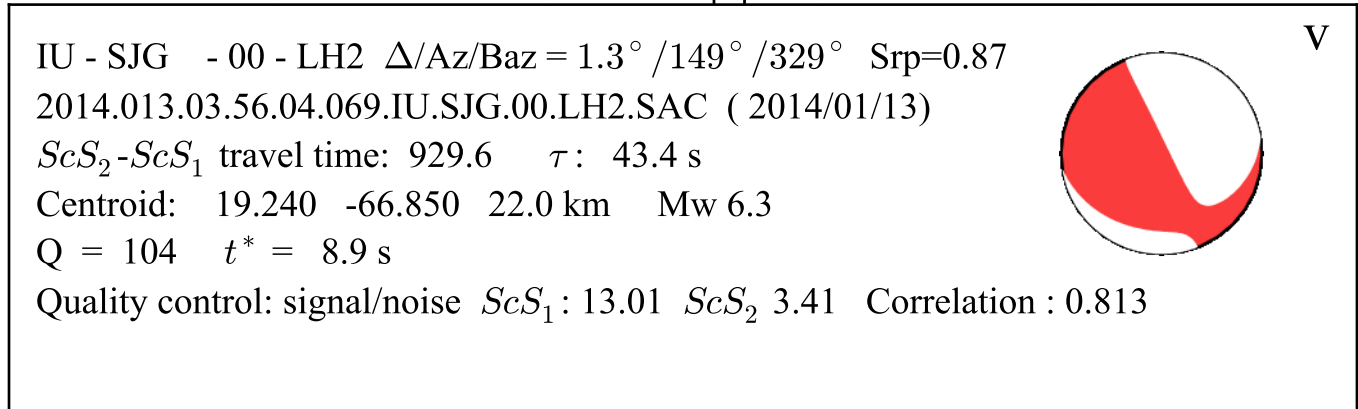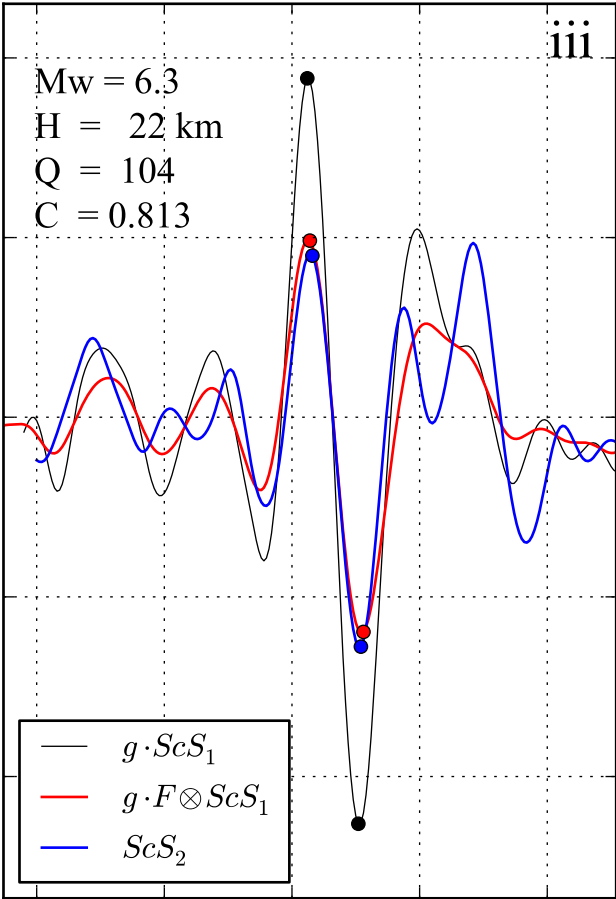

Time [s]

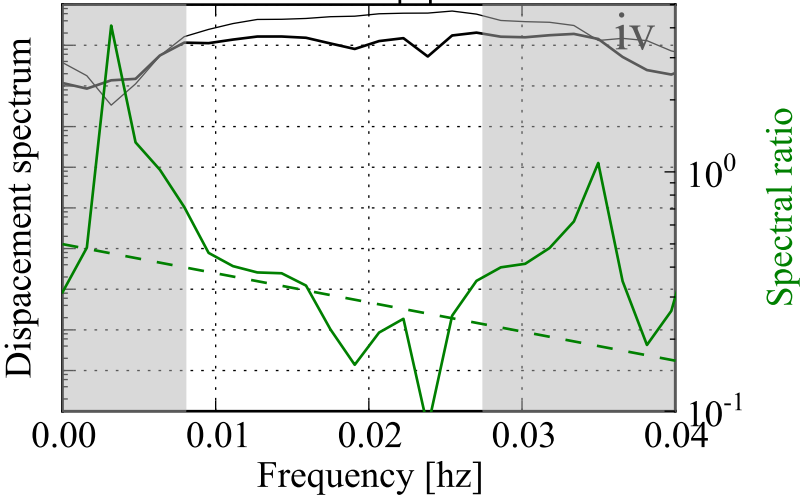

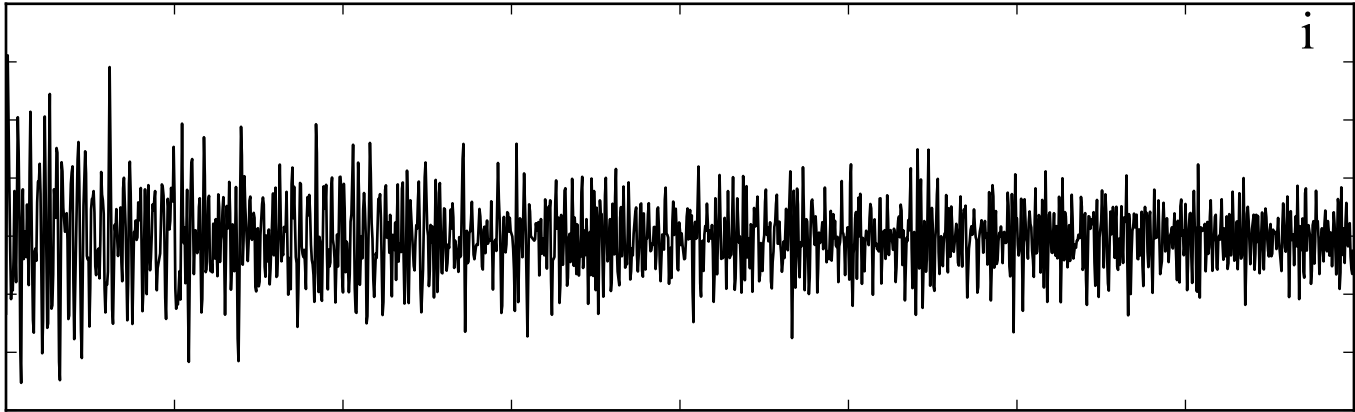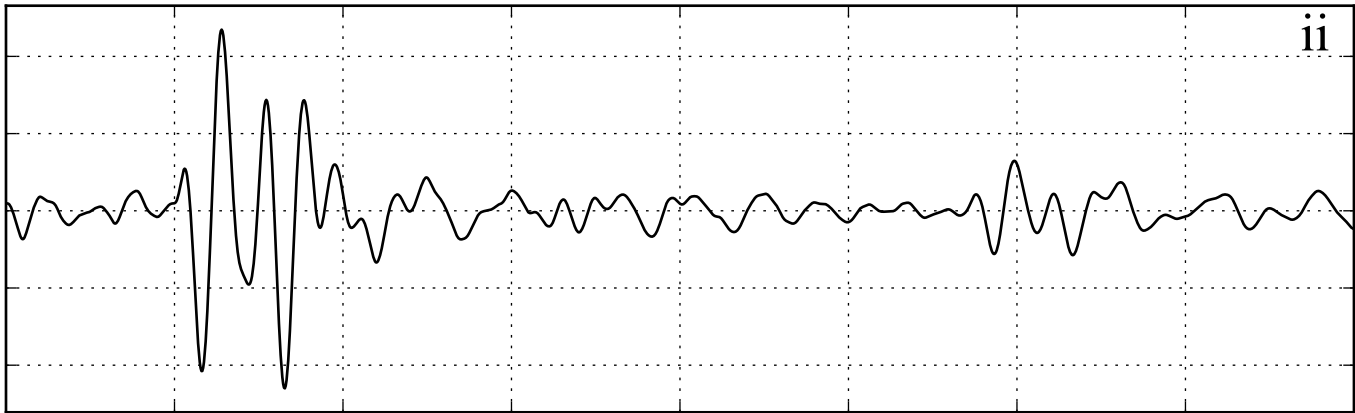

Time [s]

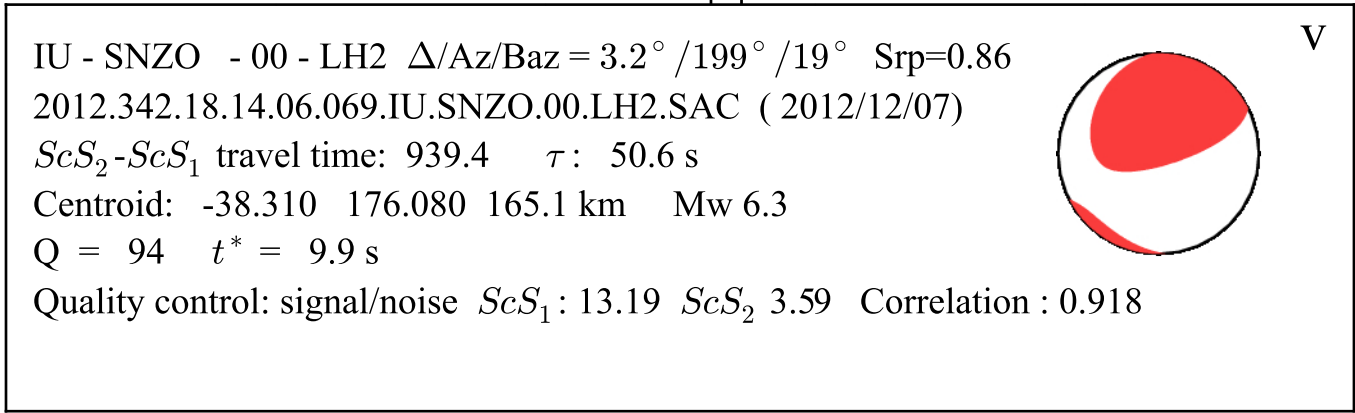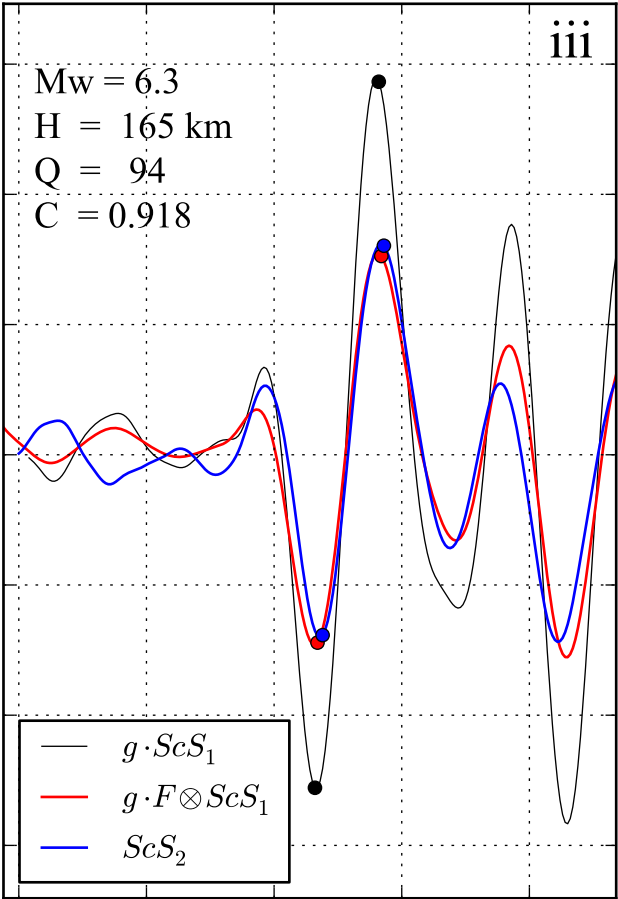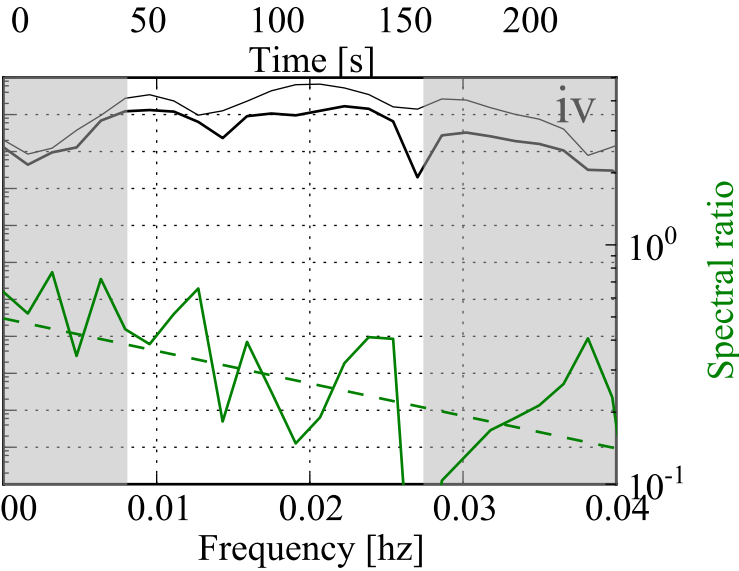



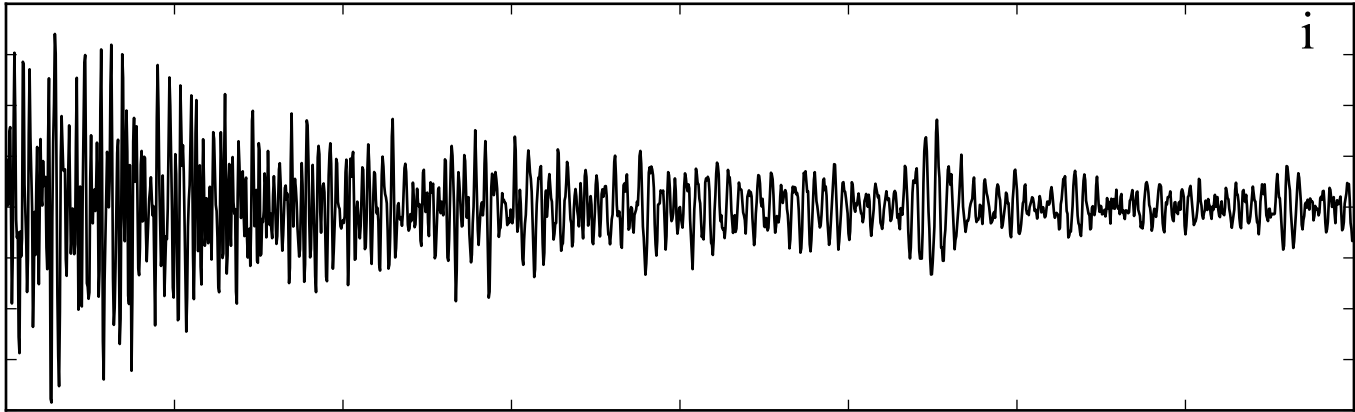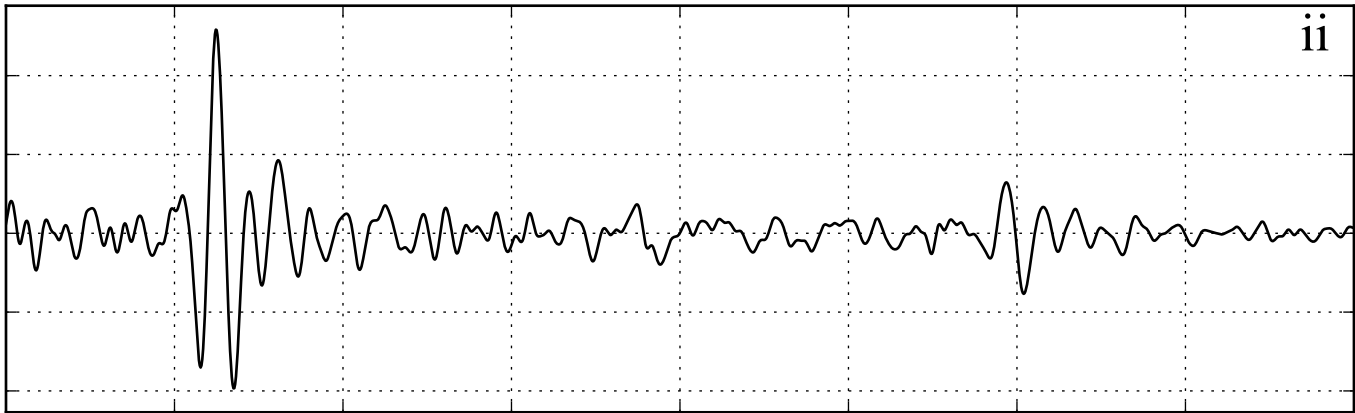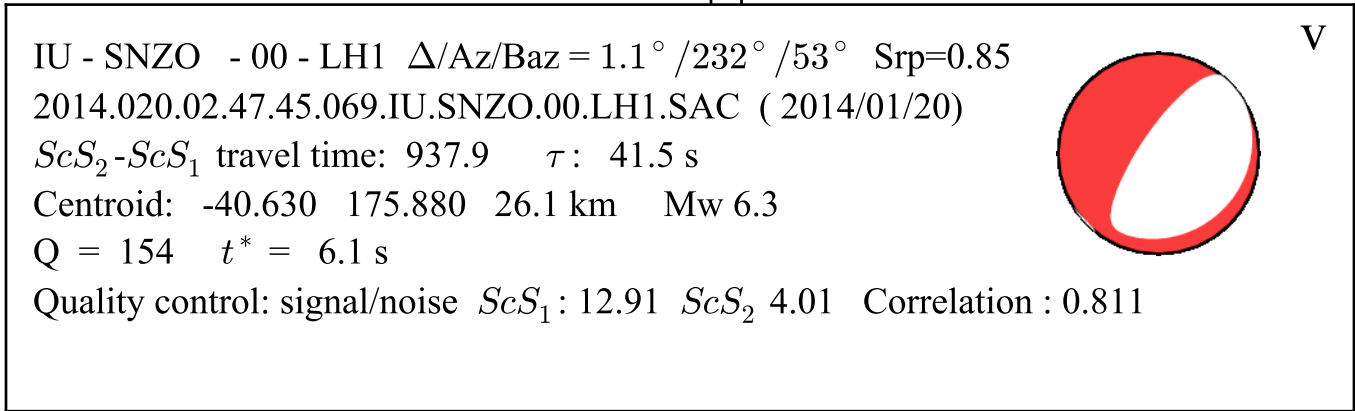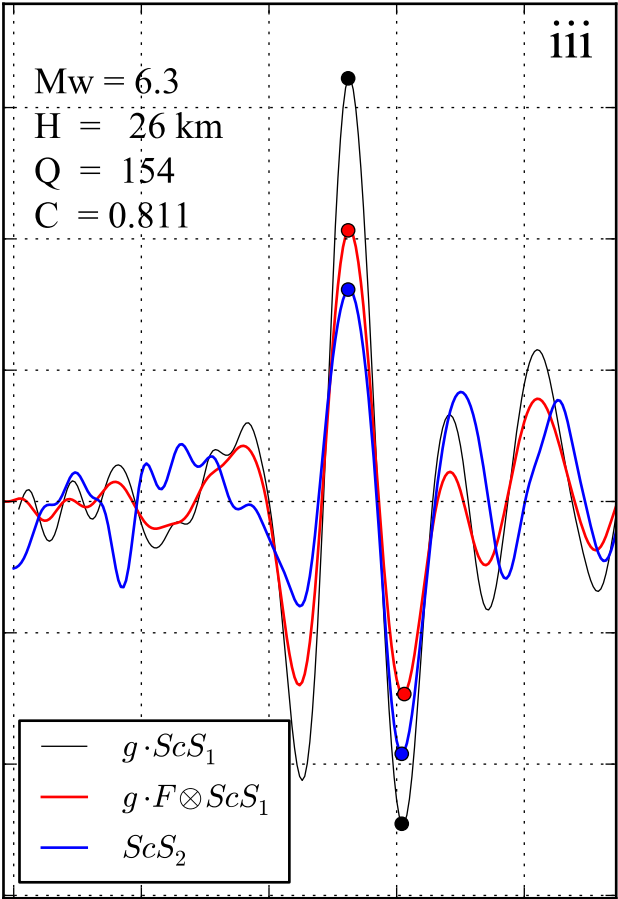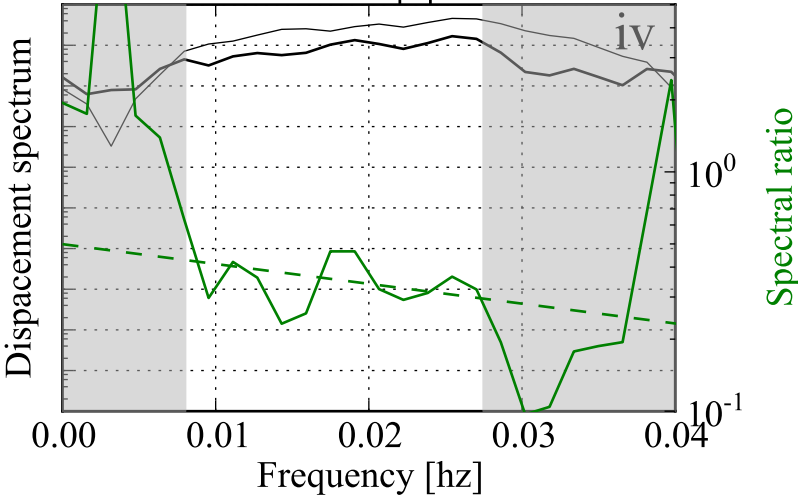

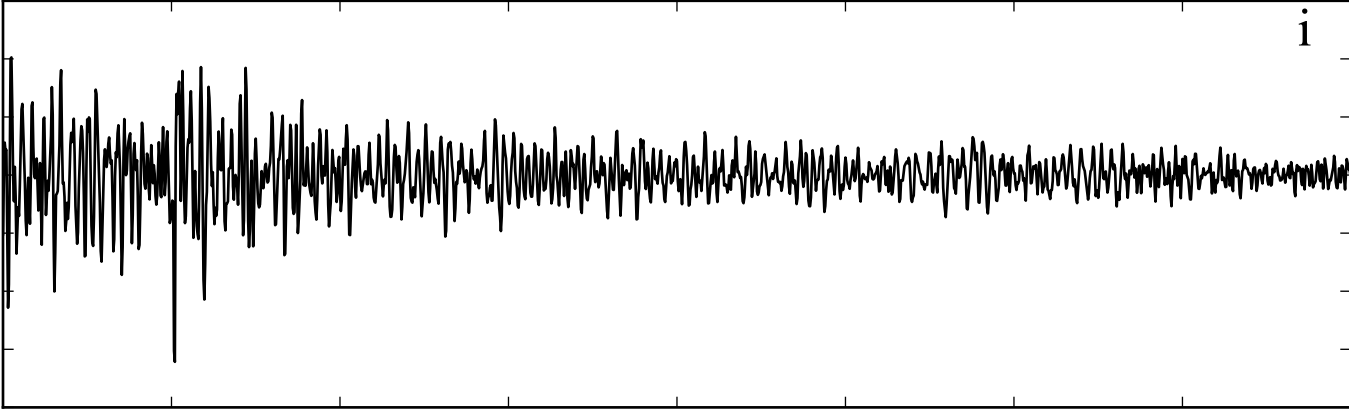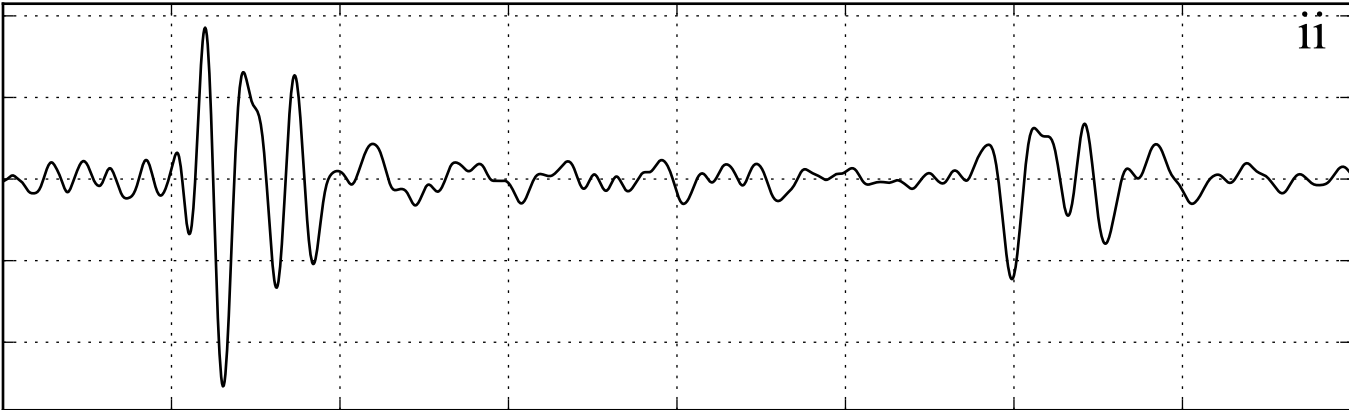

Time [s]

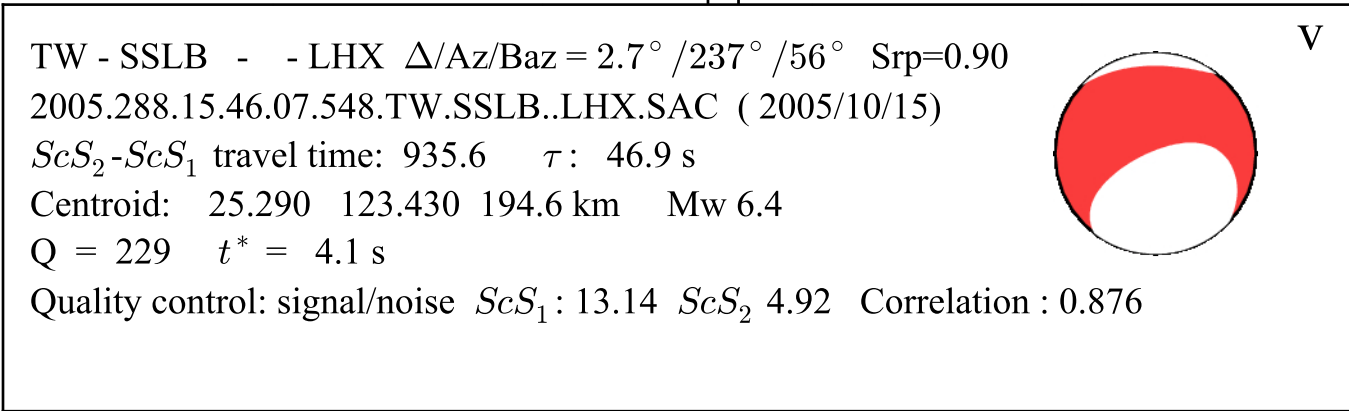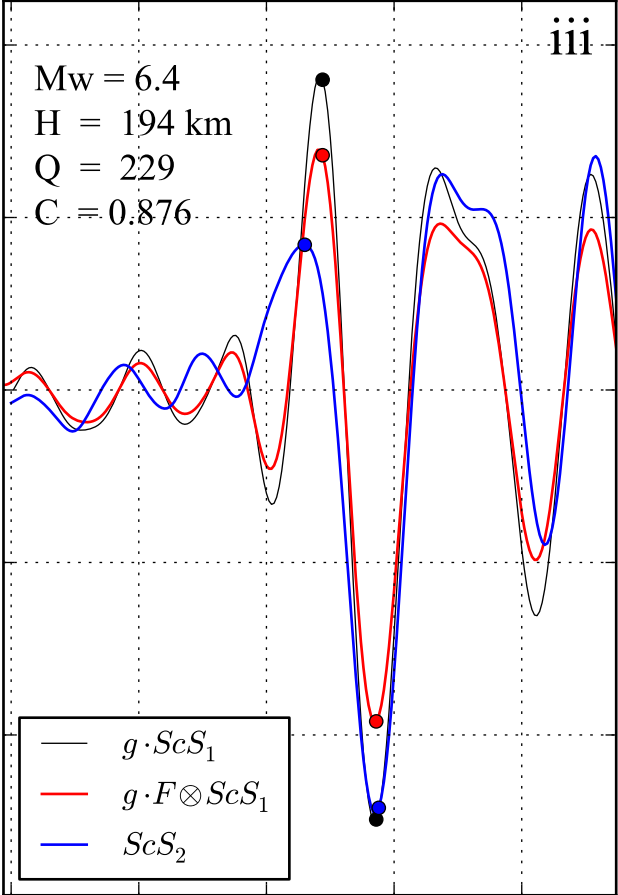

Time [s]

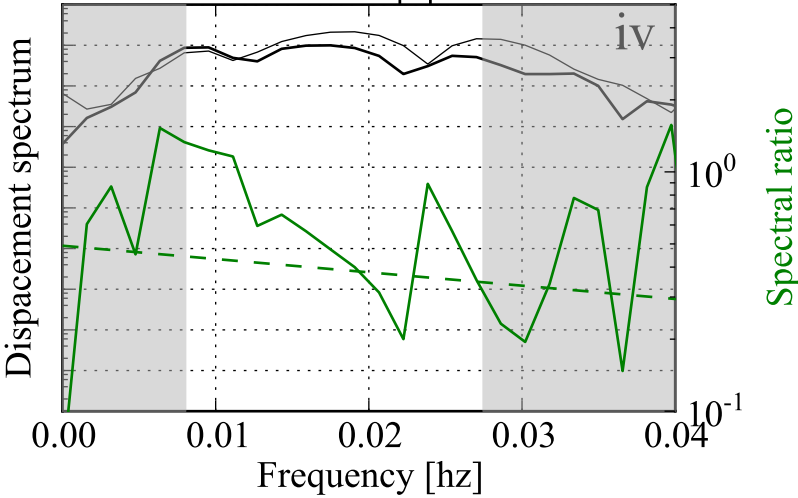

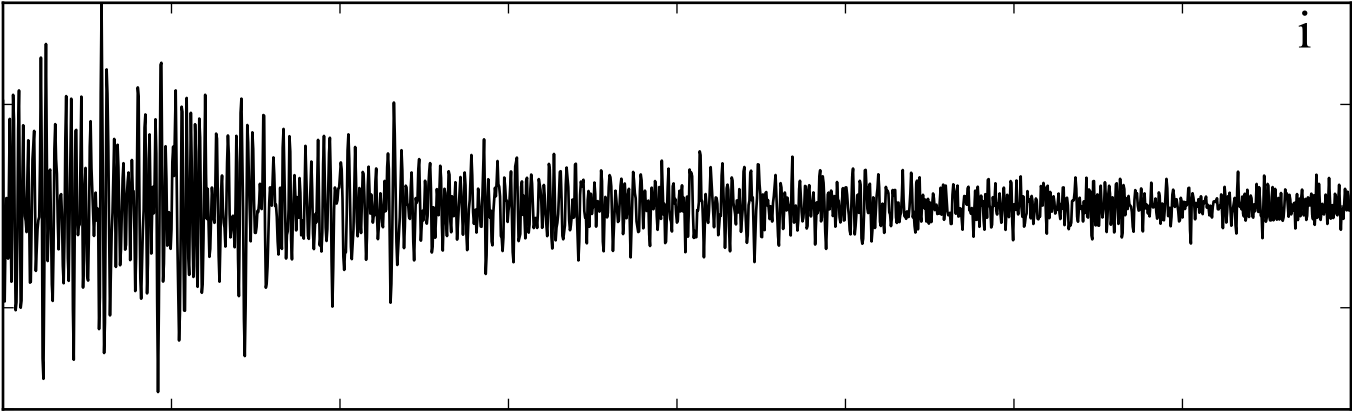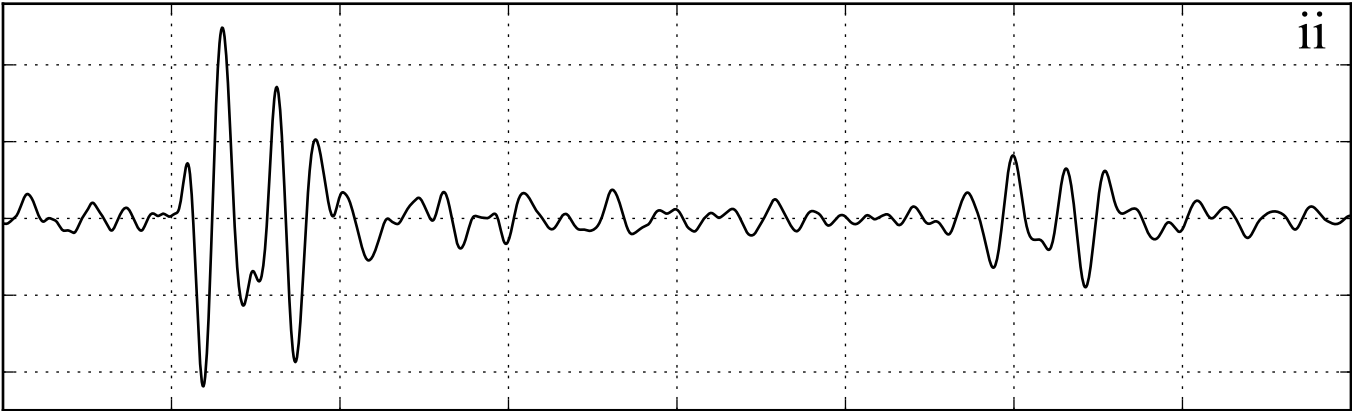

Time [s]

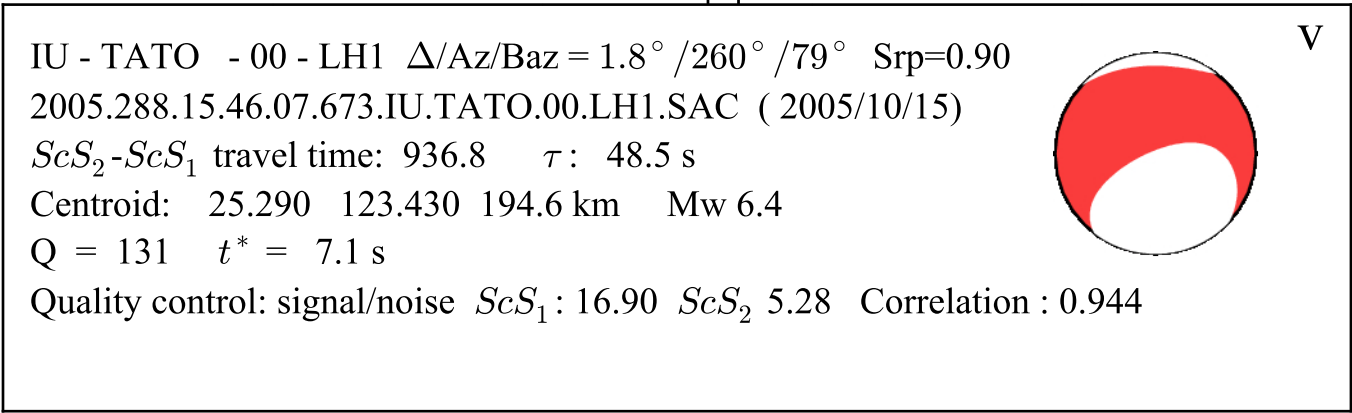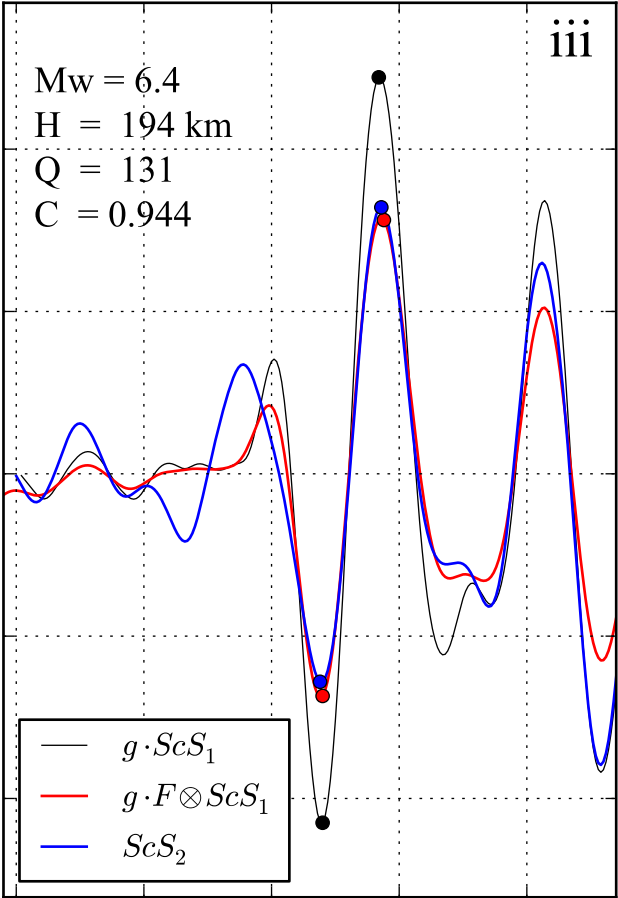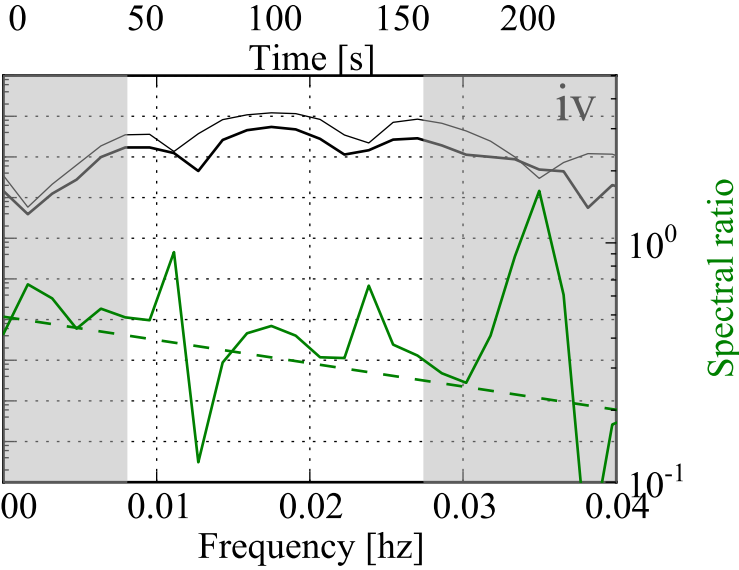

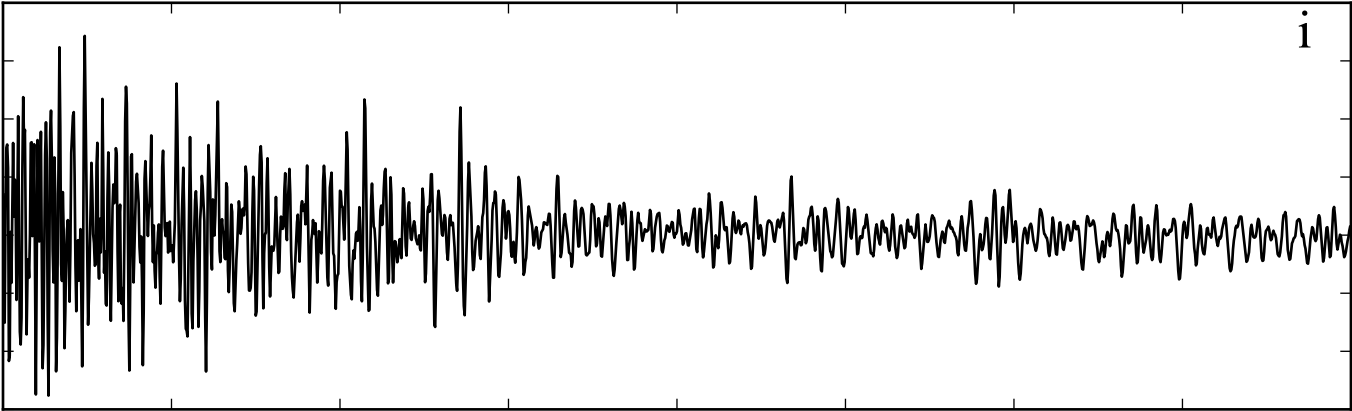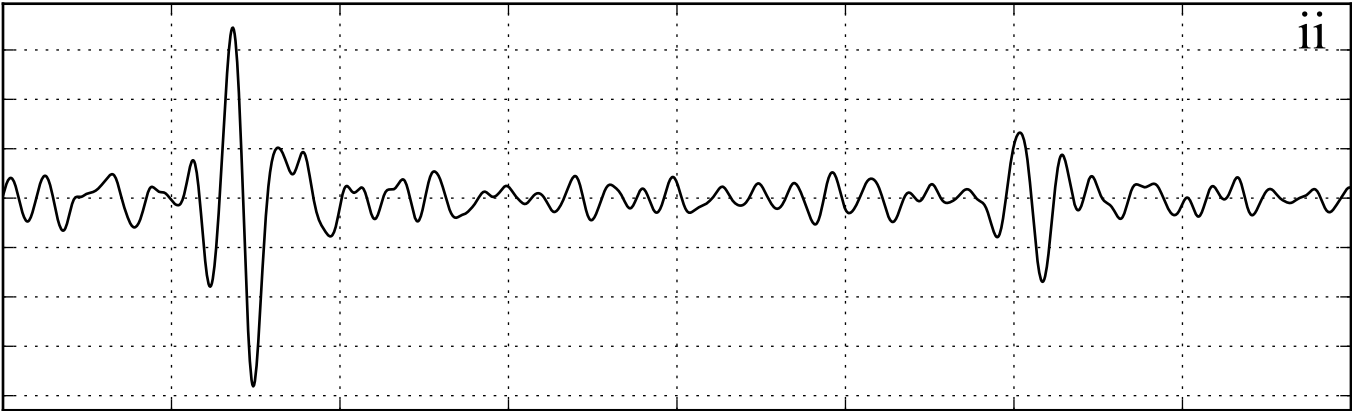

Time [s]

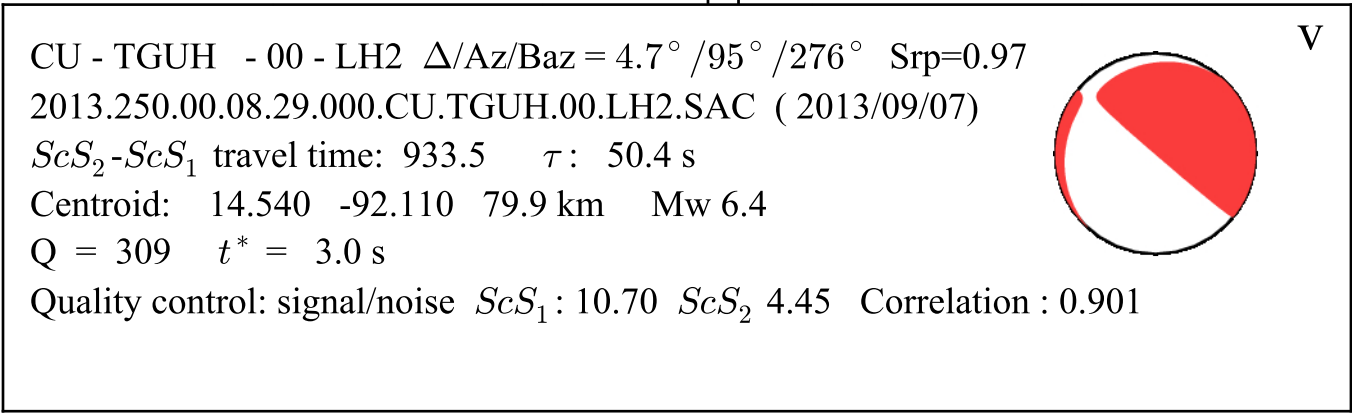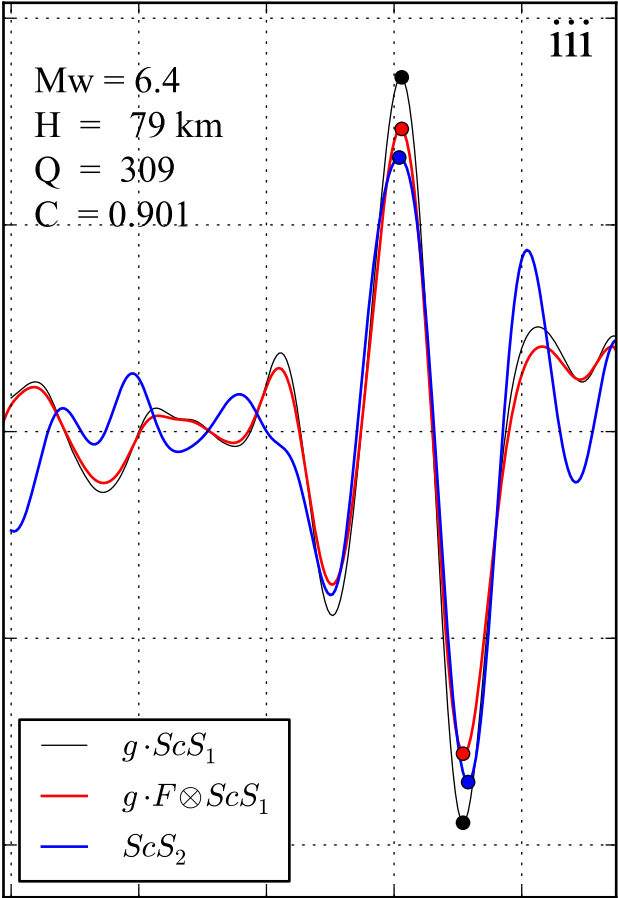

Time [s]

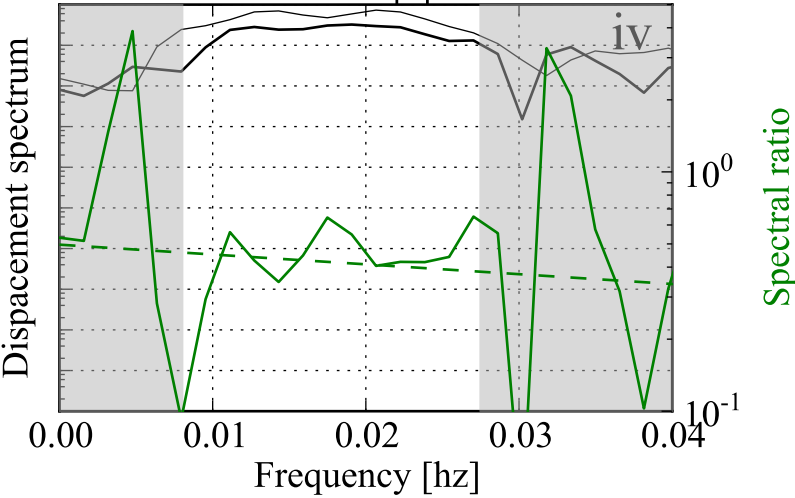

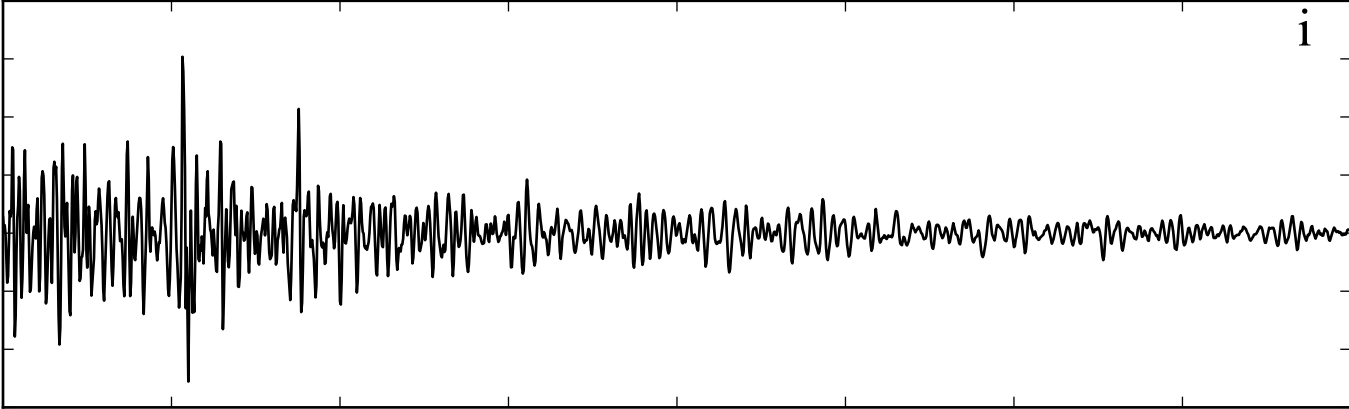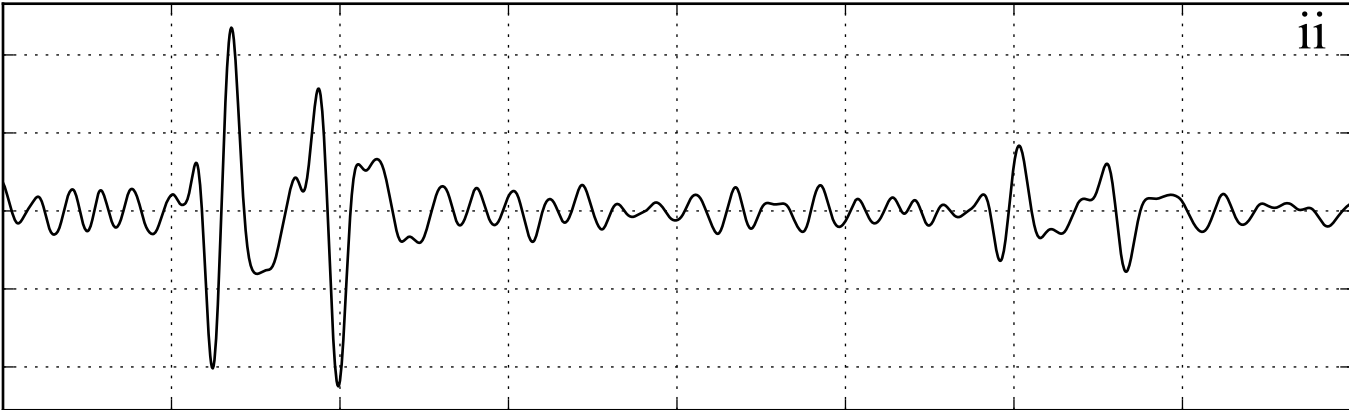

Time [s]

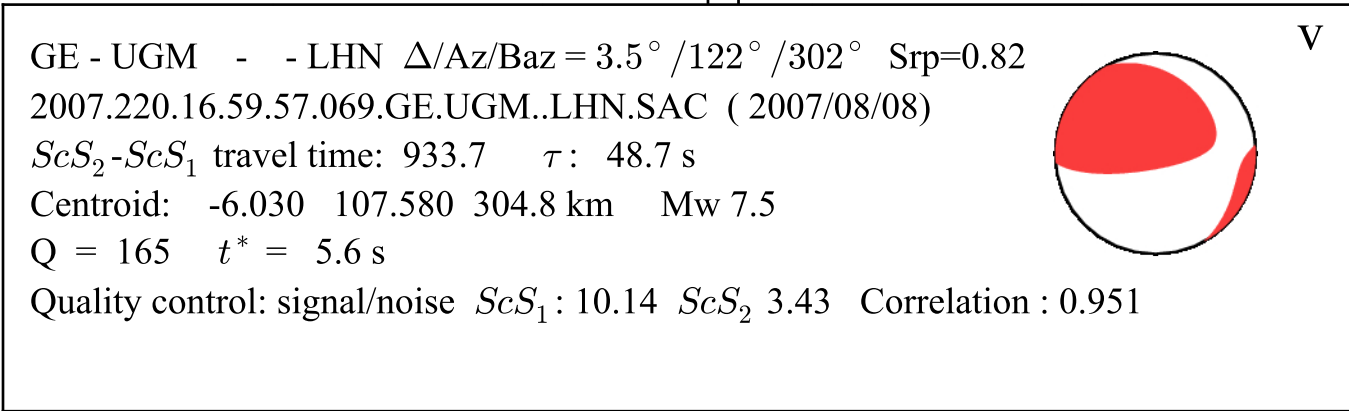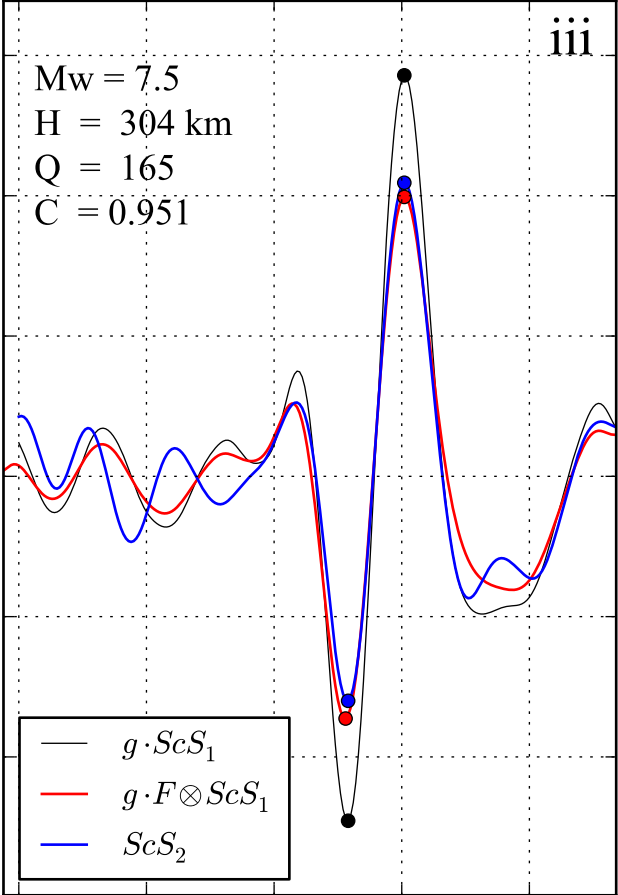

Time [s]

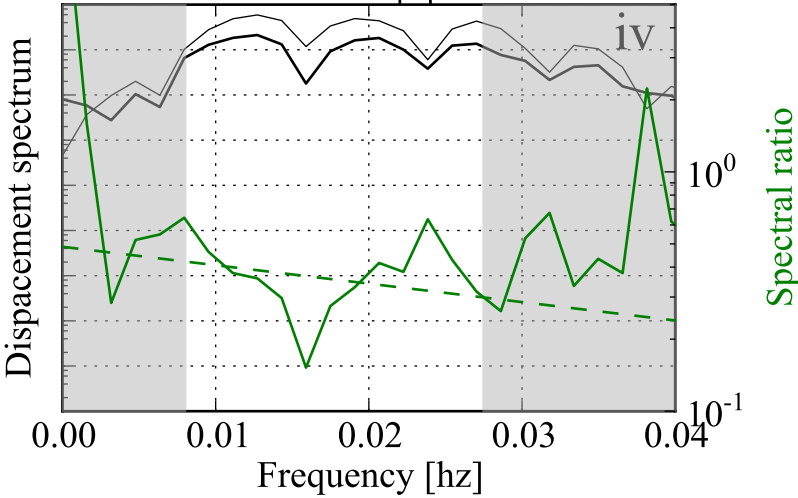

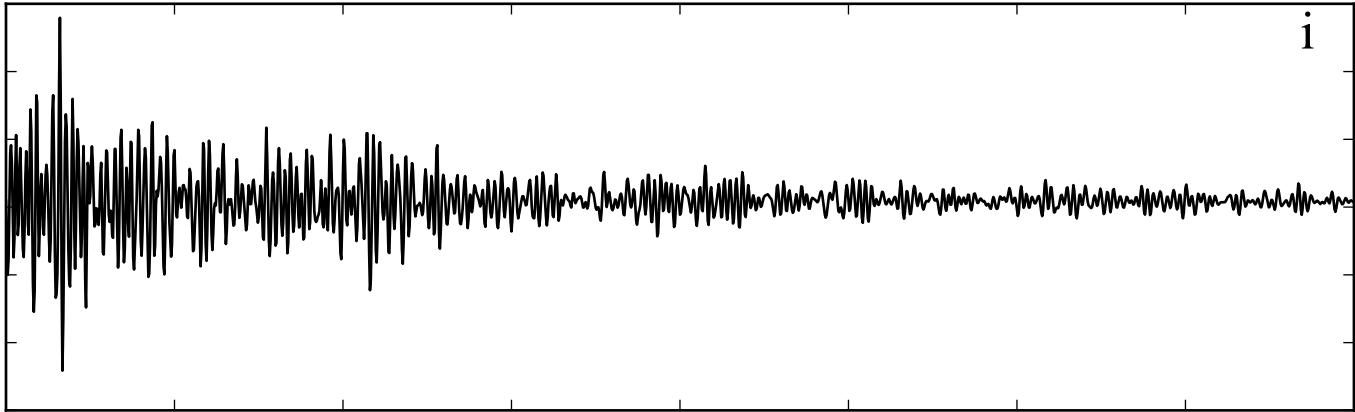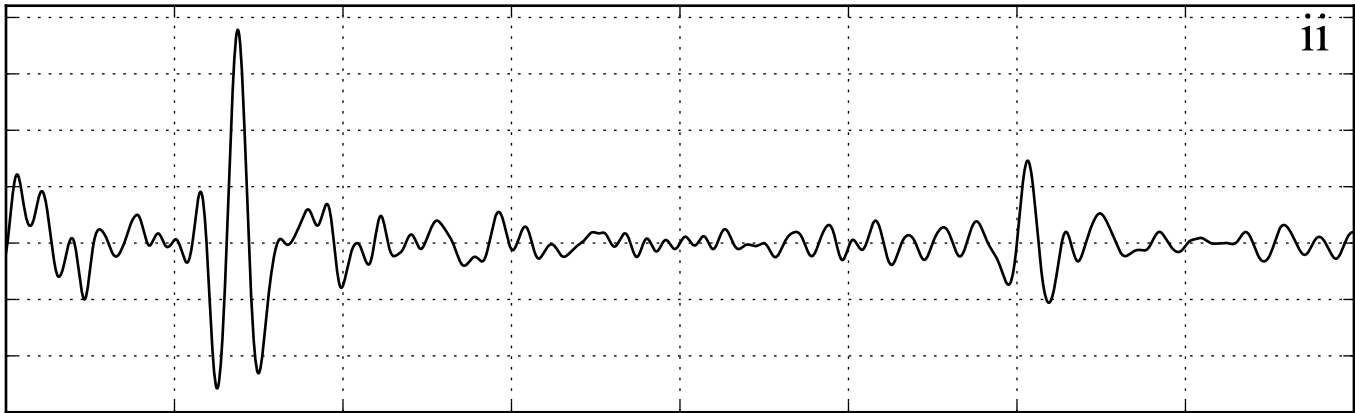

Time [s]

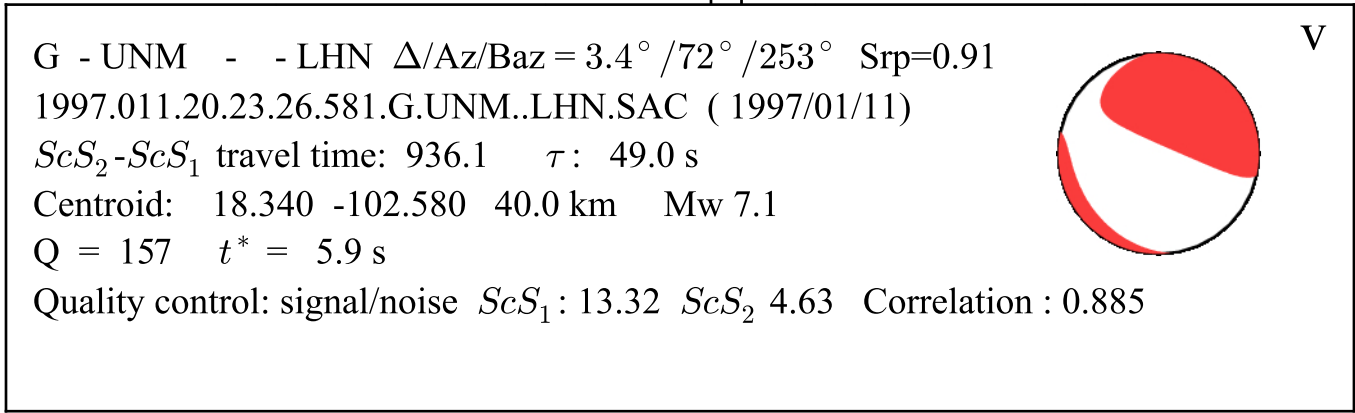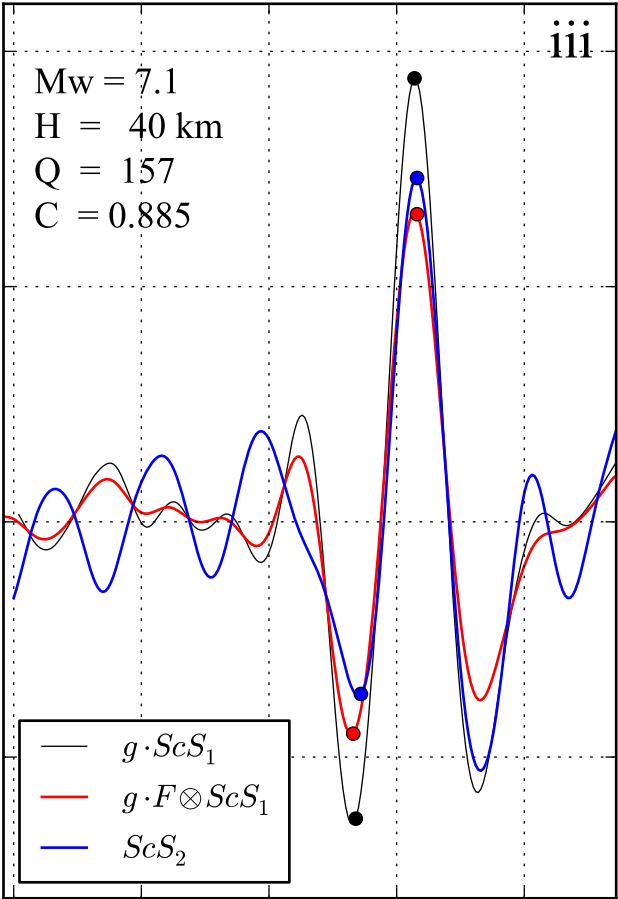

Time [s]

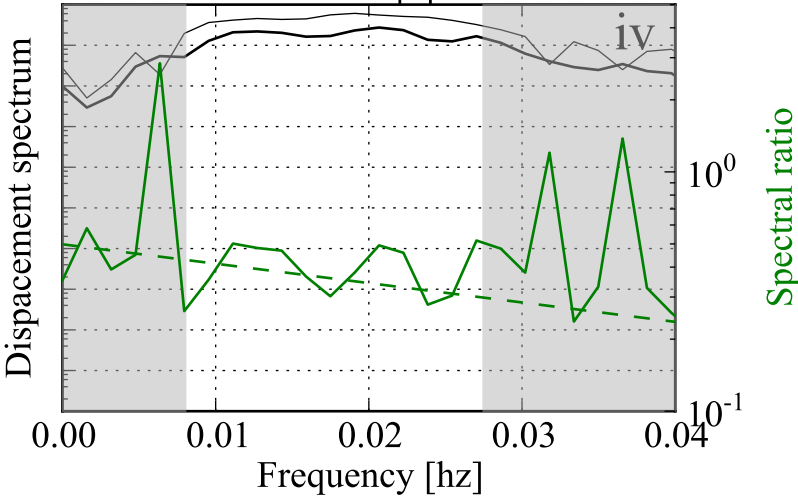

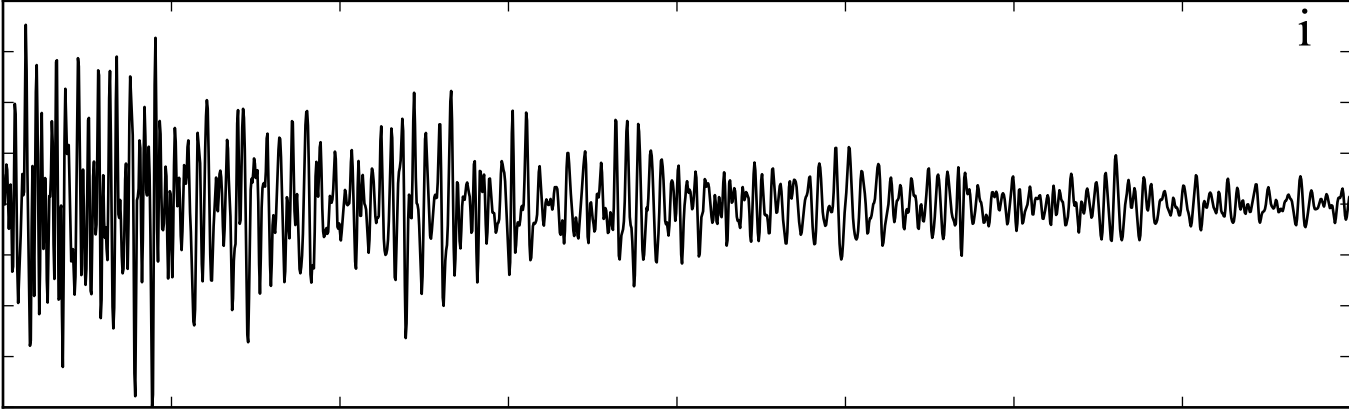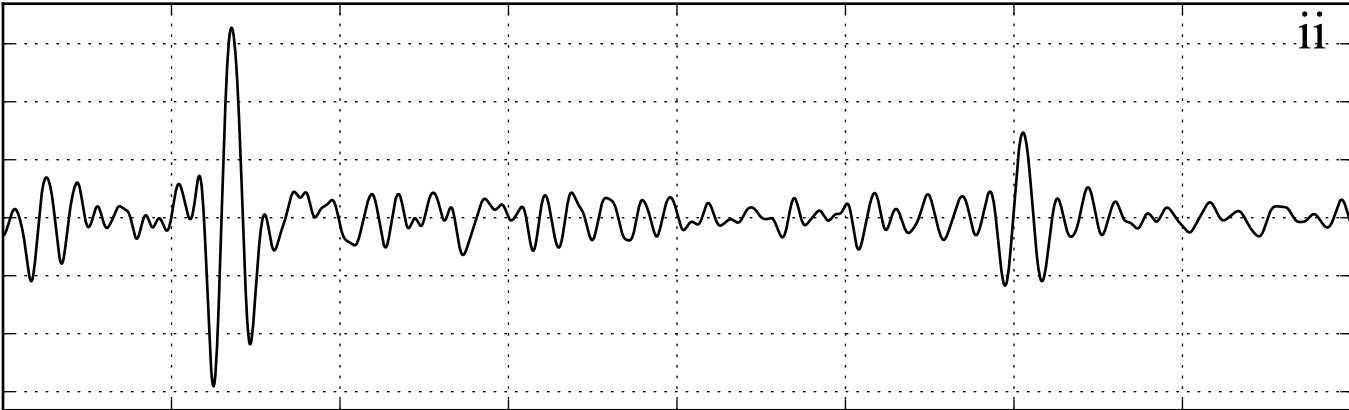

Time [s]

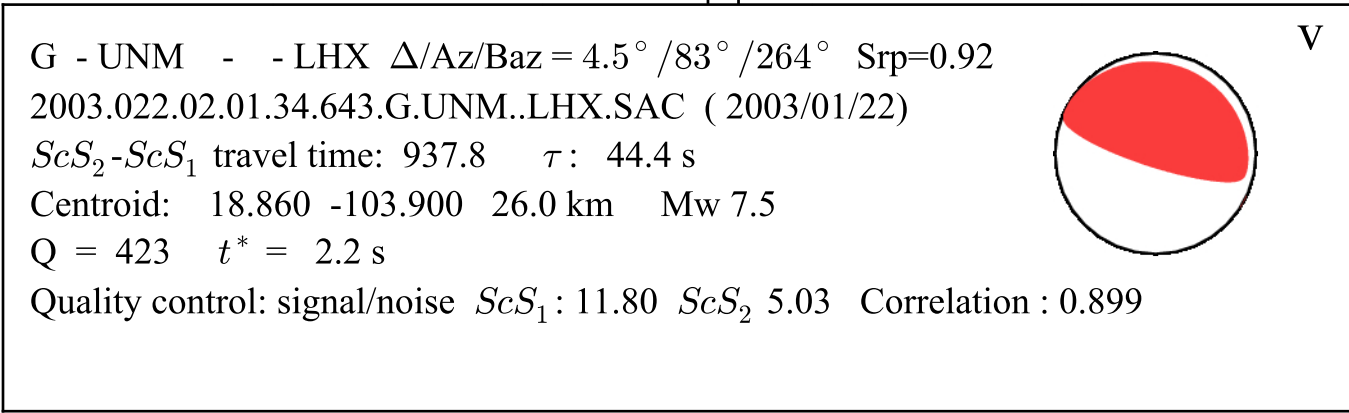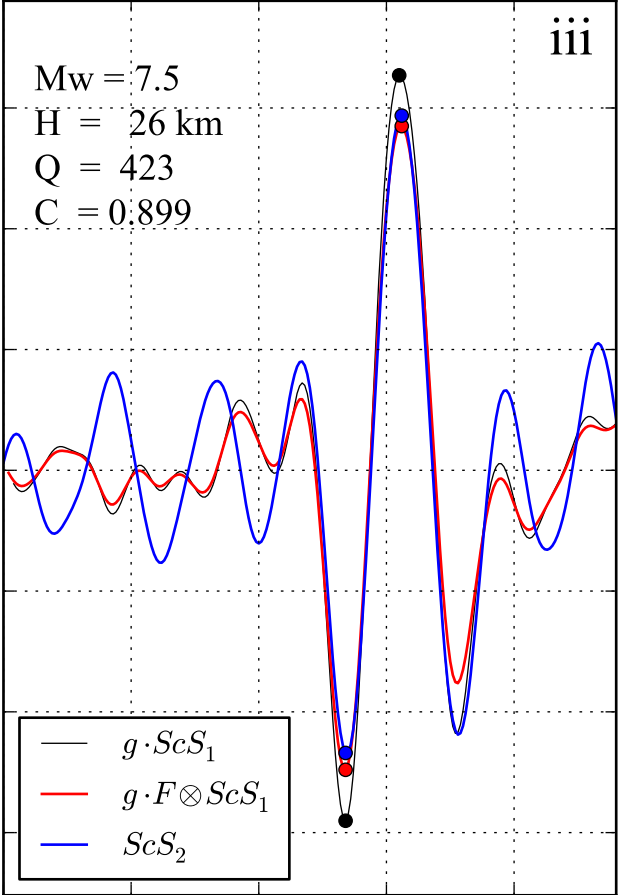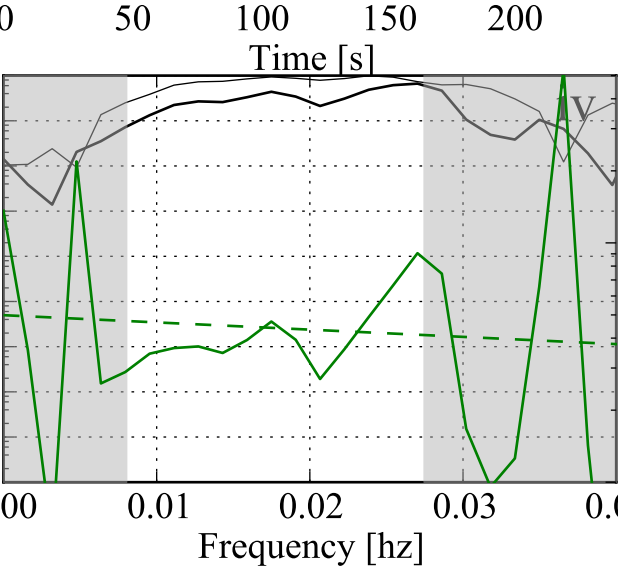

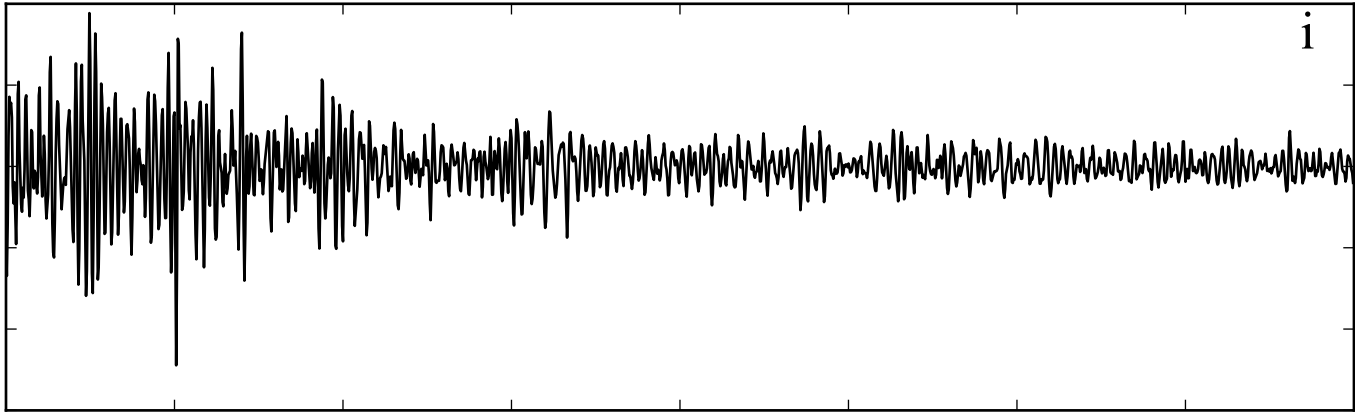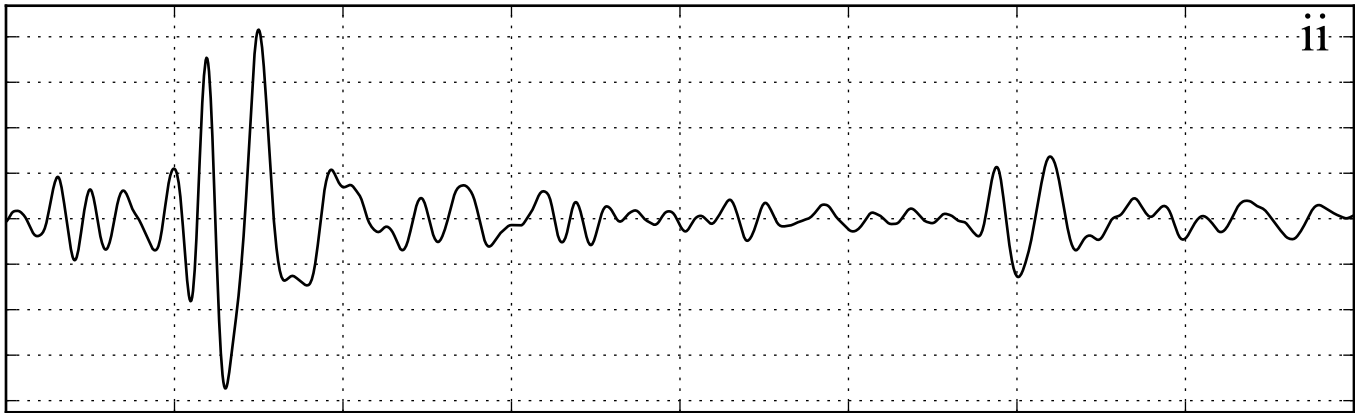

Time [s]

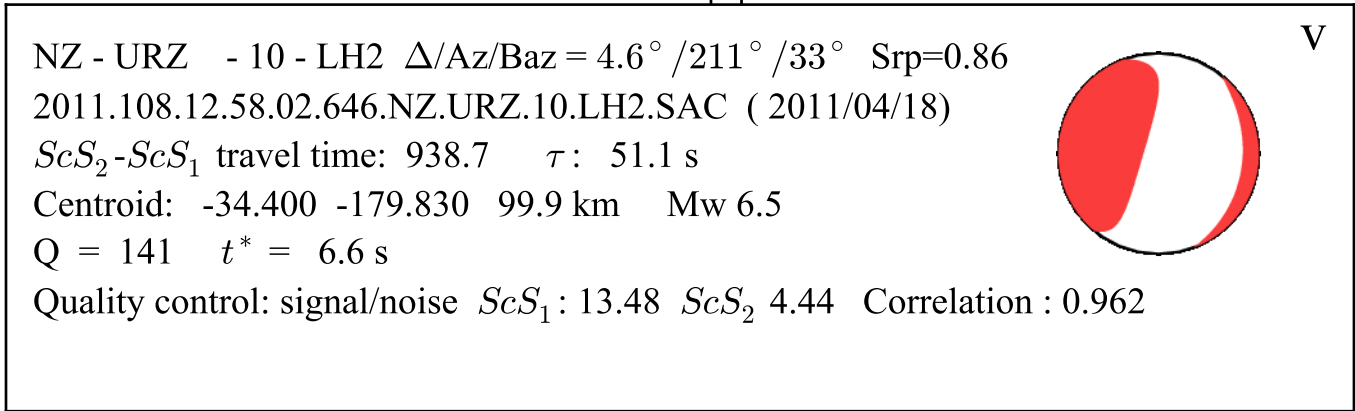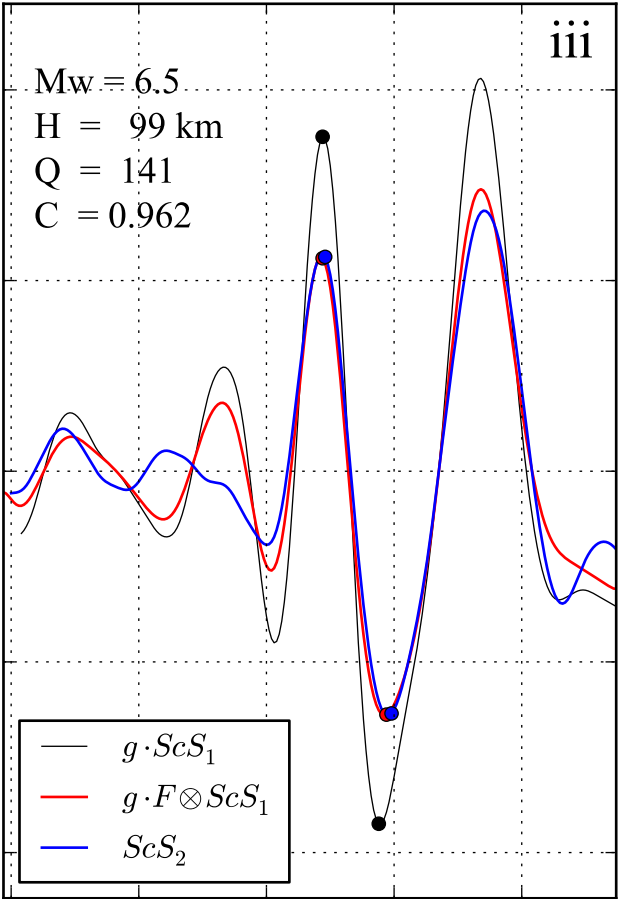

Time [s]

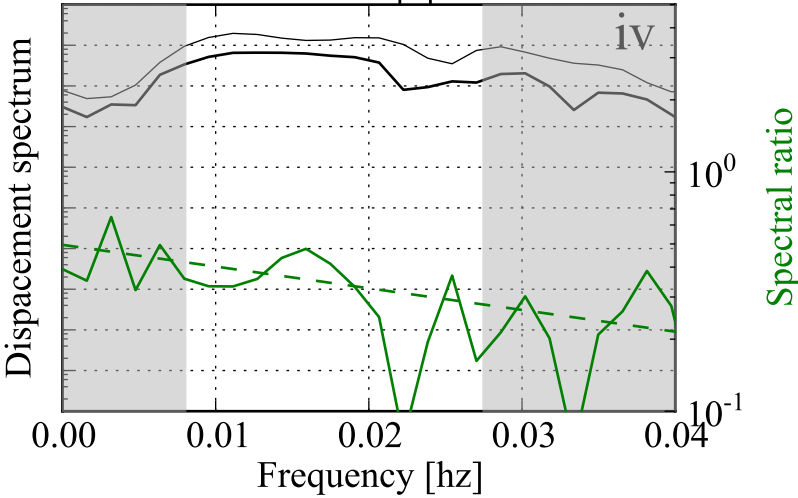



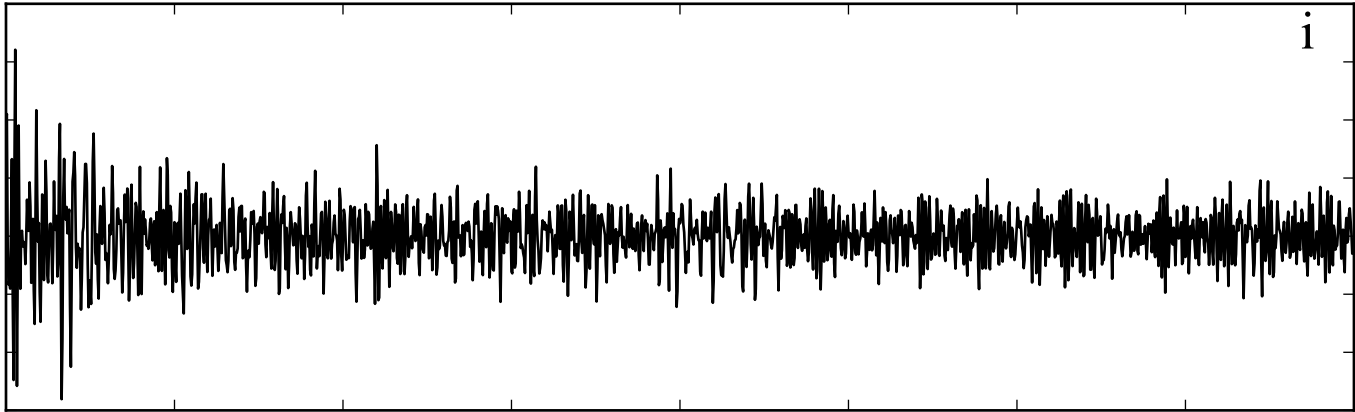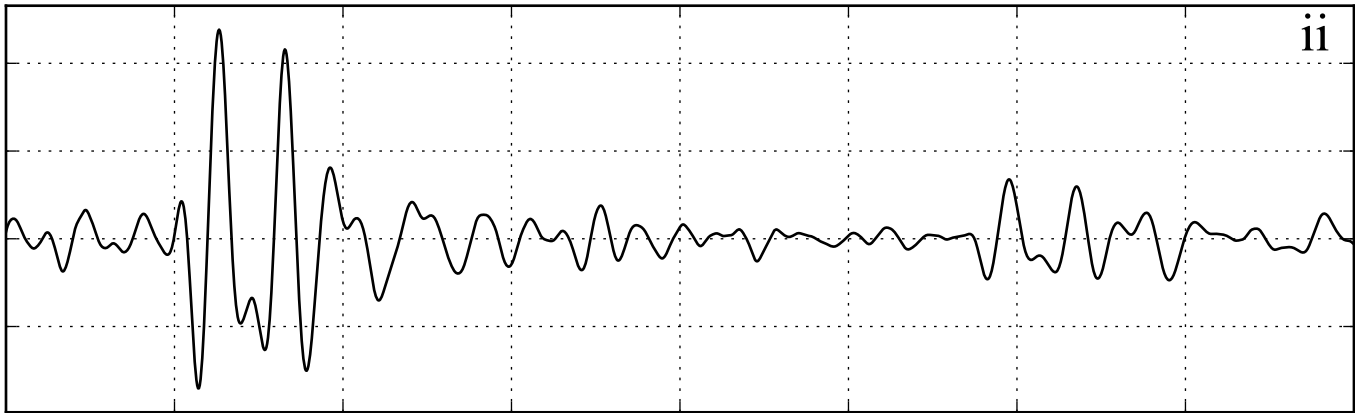

Time [s]

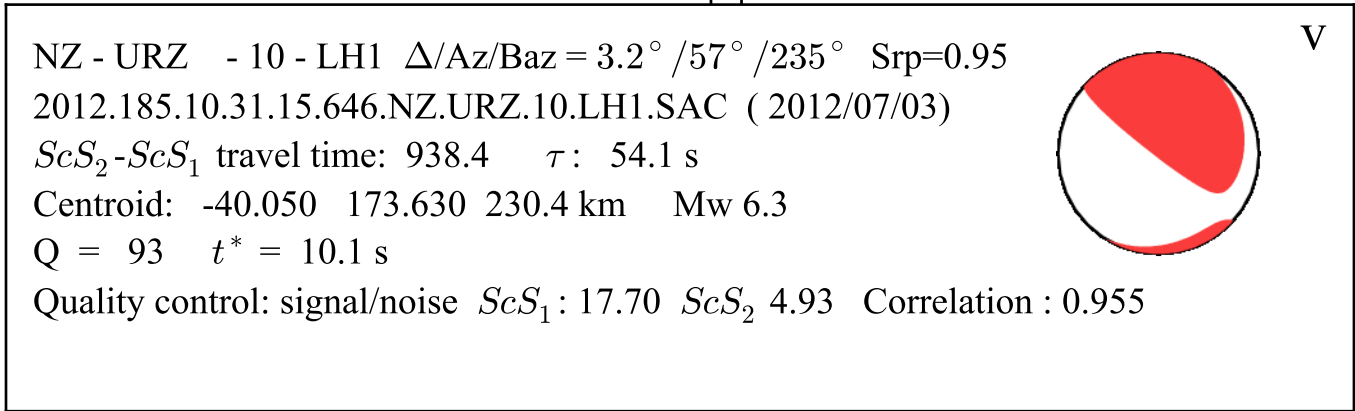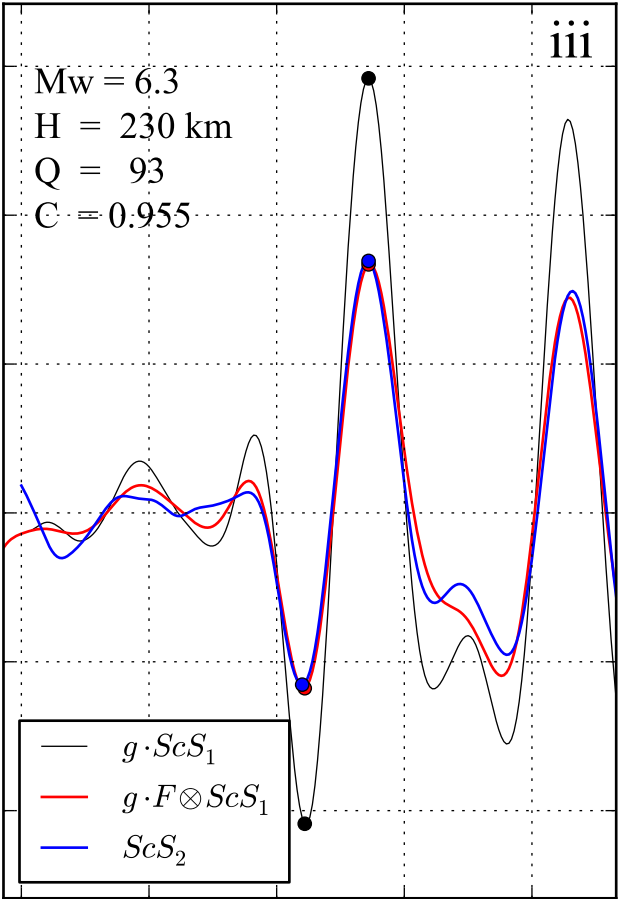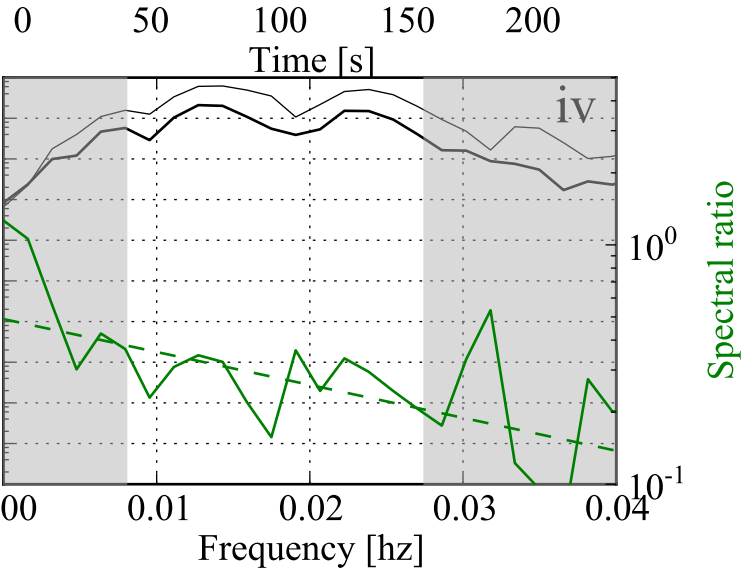

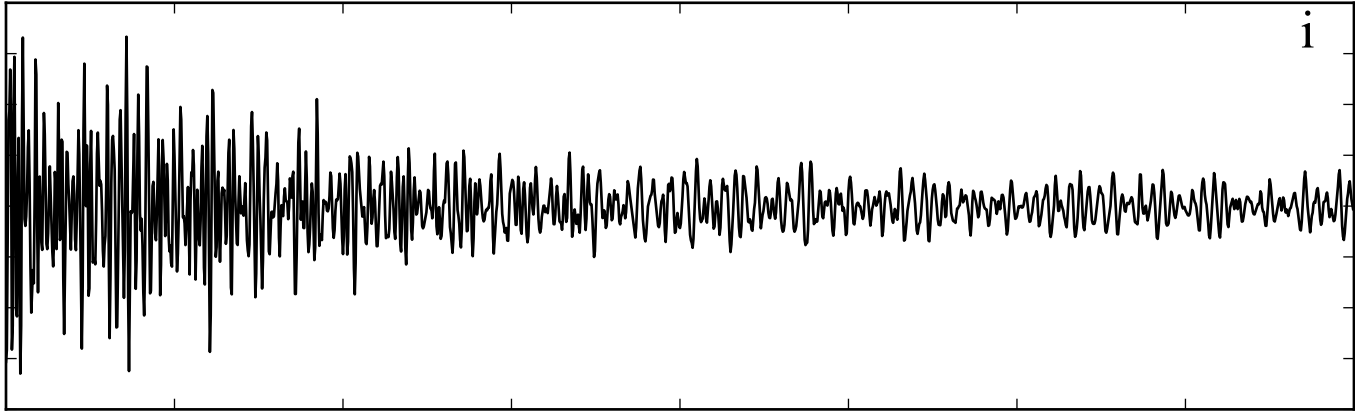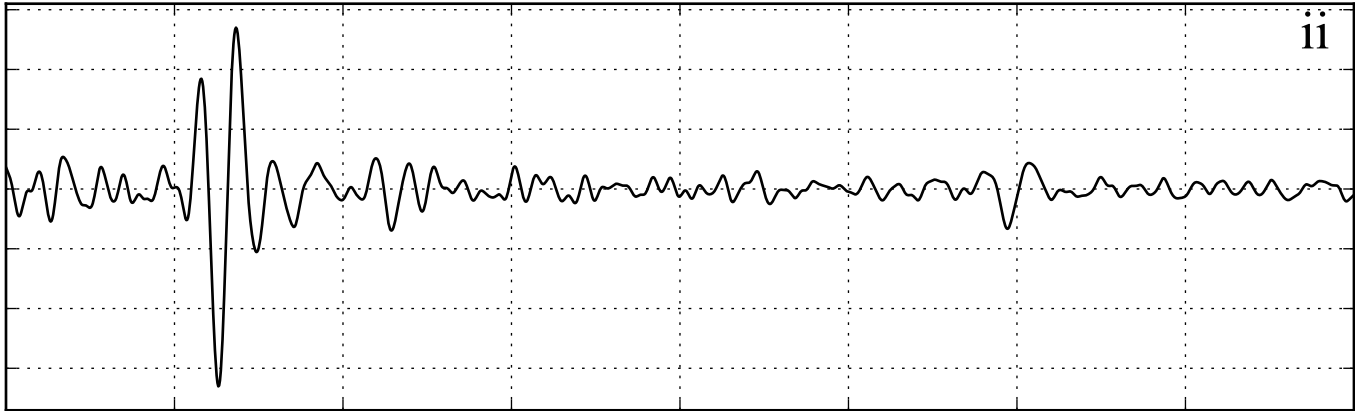

Time [s]

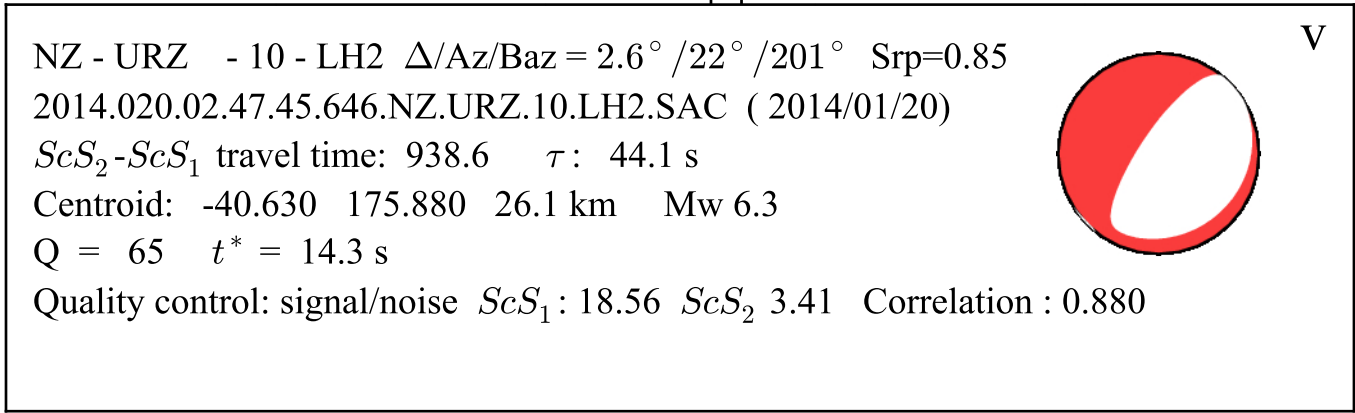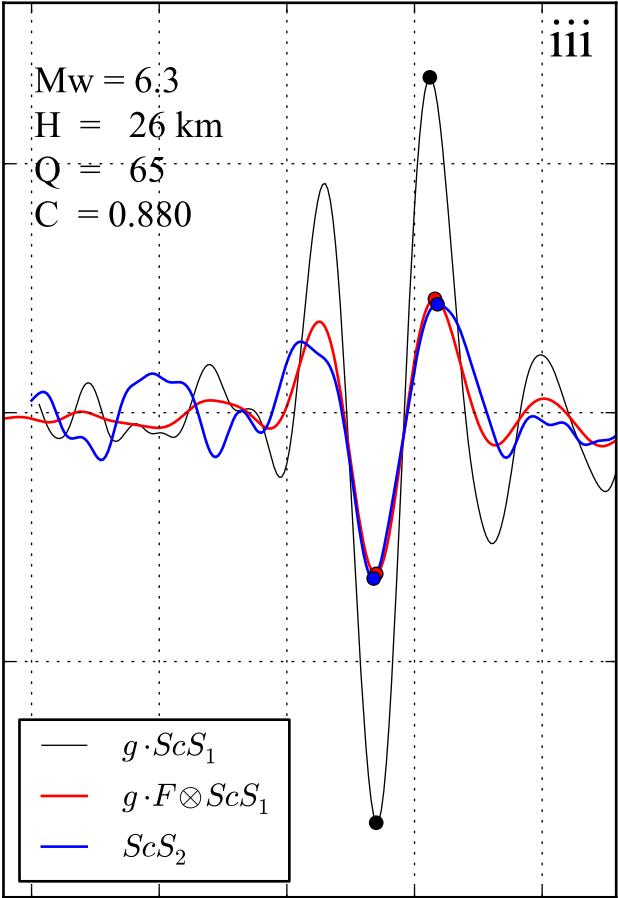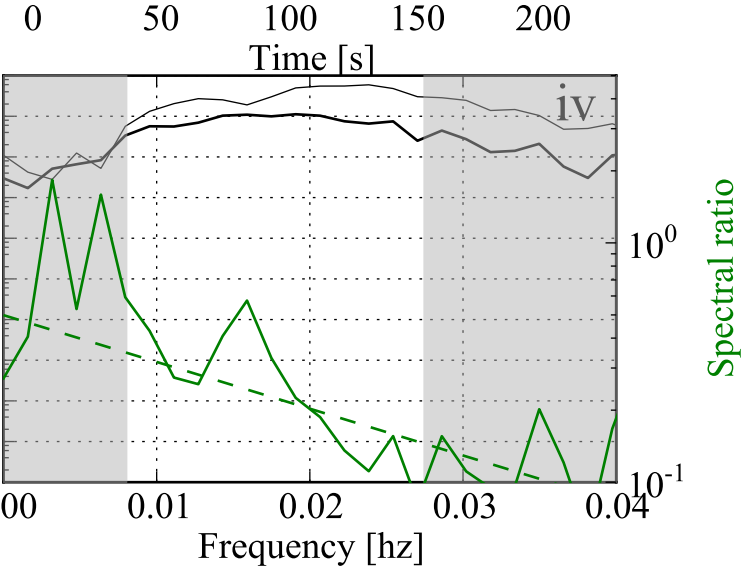

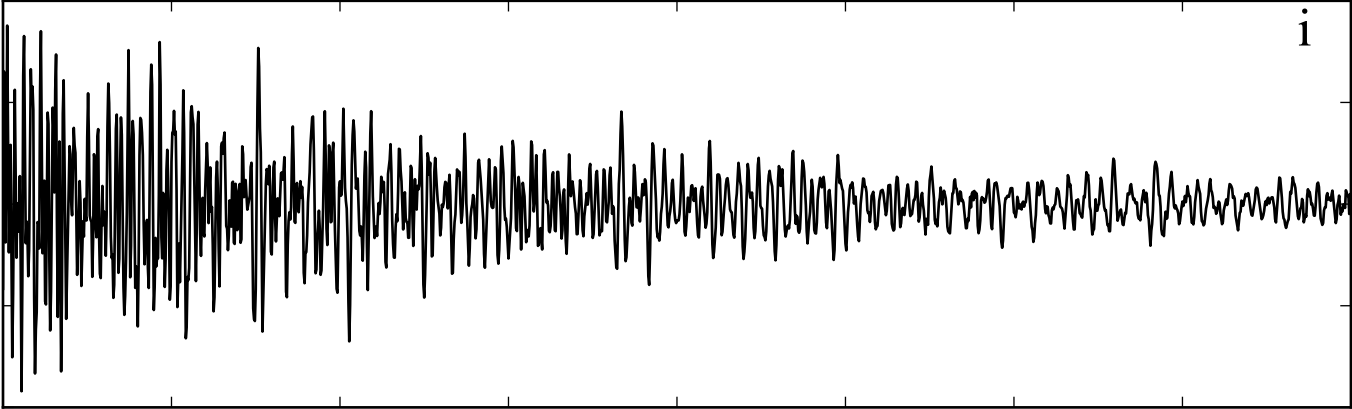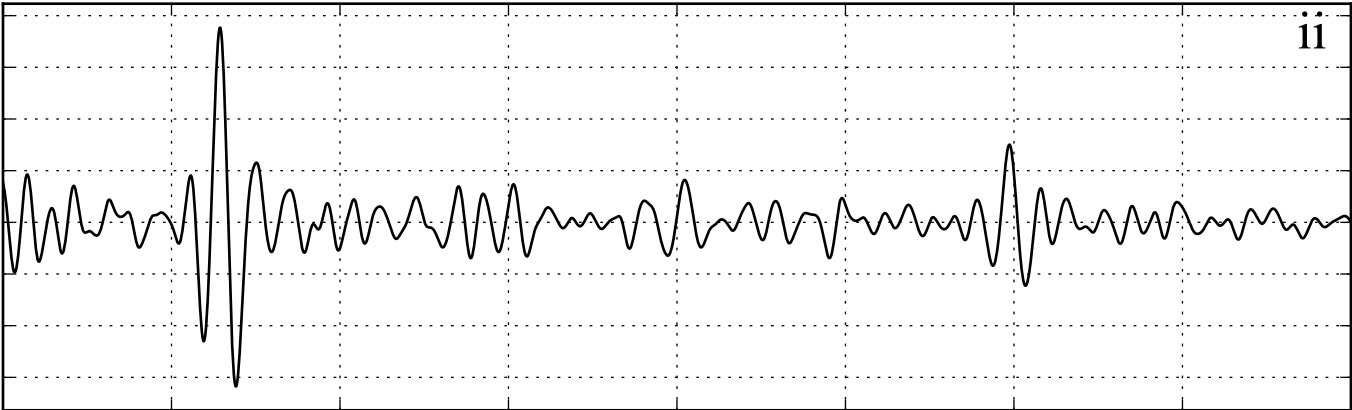

Time [s]

TW - YHNB - - LHN  $\Delta/Az/Baz = 1.3^\circ/310^\circ/129^\circ$   $Srp=0.84$   
2004.313.15.50.01.069.TW.YHNB..LHN.SAC ( 2004/11/08)  
 $ScS_2$ - $ScS_1$  travel time: 935.8  $\tau$ : 39.9 s  
Centroid: 23.860 122.430 33.0 km Mw 6.3  
 $Q = 311$   $t^* = 3.0$  s  
Quality control: signal/noise  $ScS_1$ : 8.74  $ScS_2$  3.44 Correlation : 0.892

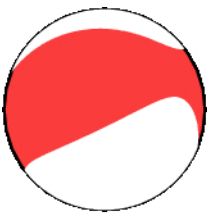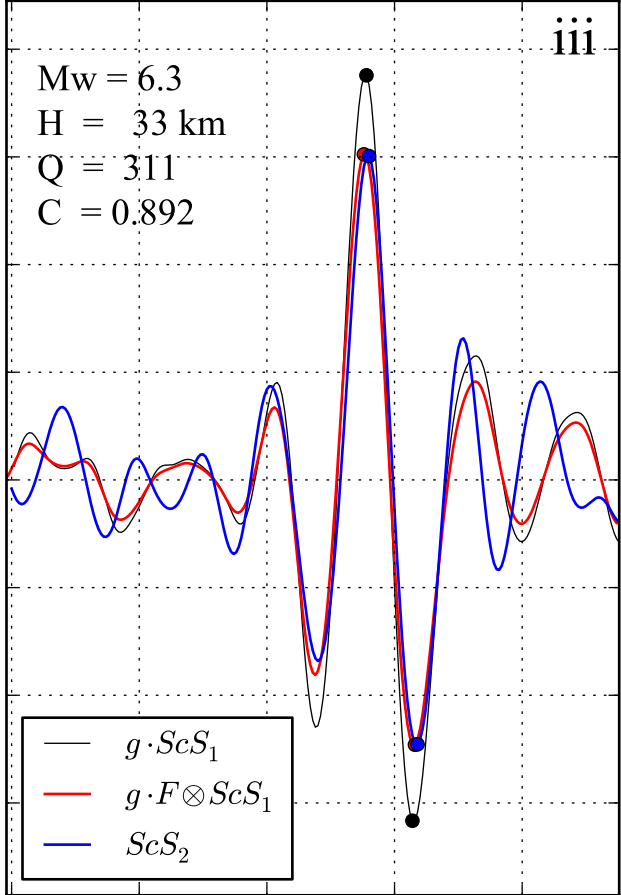

Time [s]

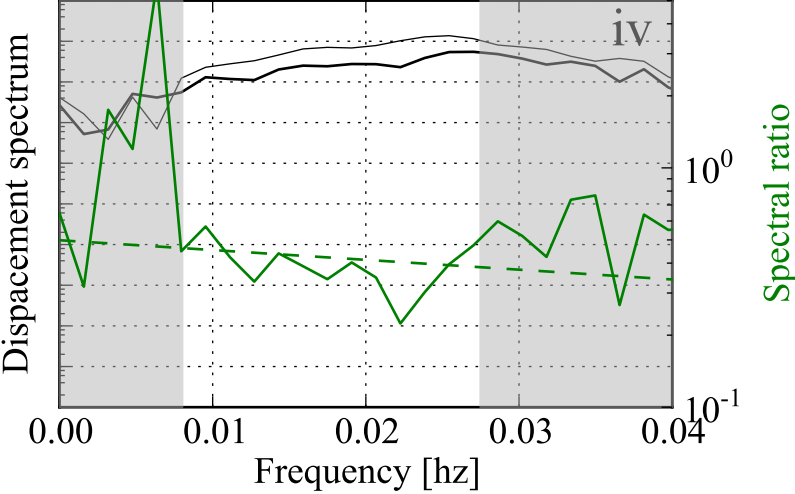

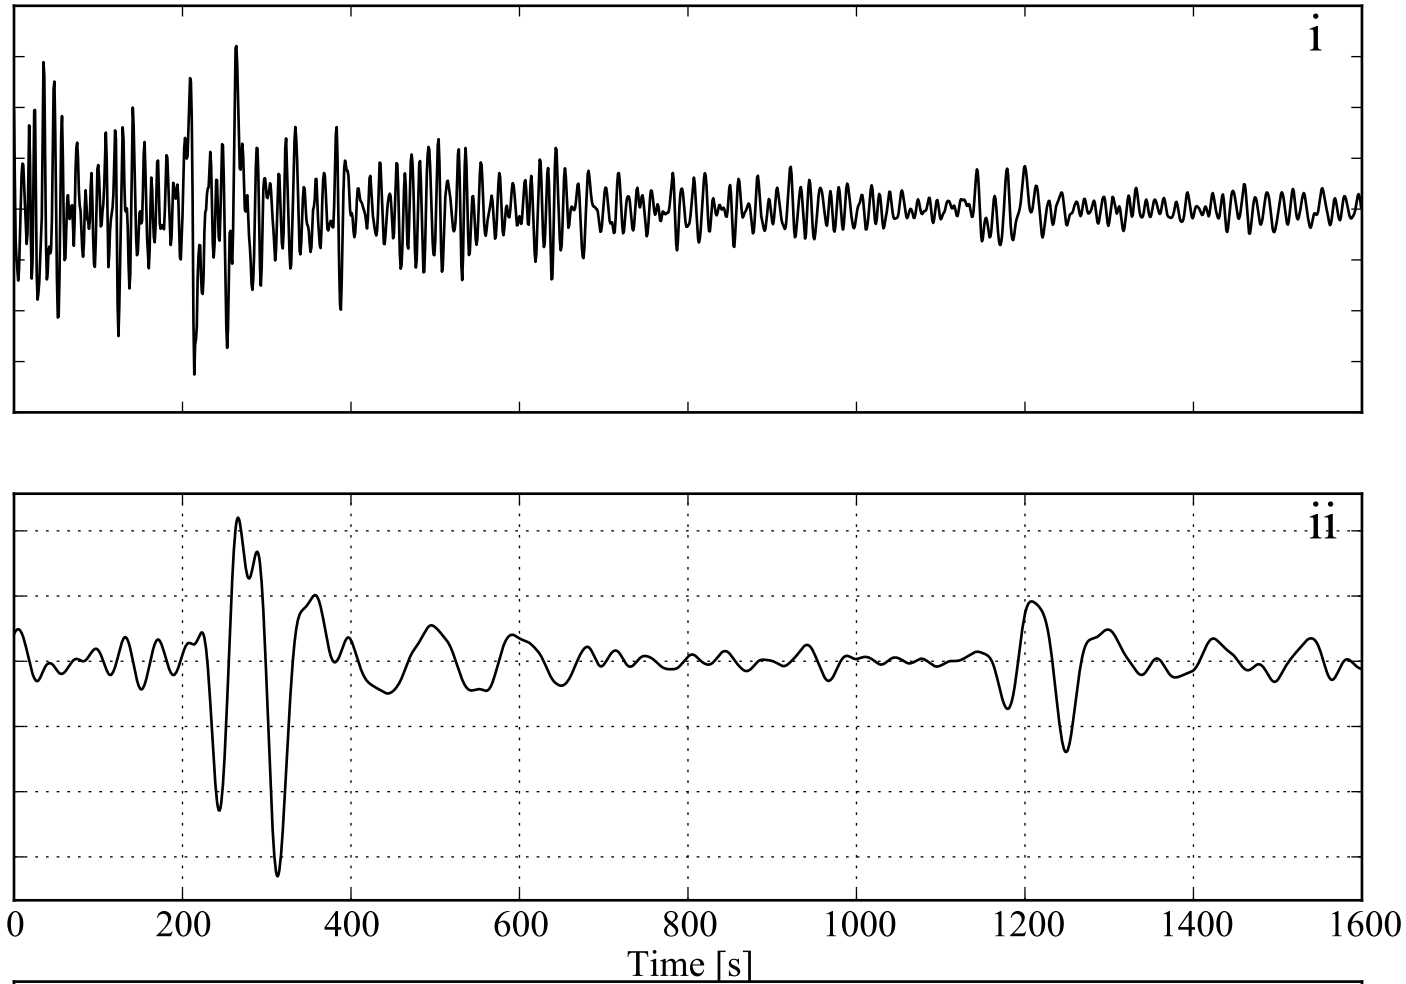

IU - YSS - - LHN  $\Delta/Az/Baz = 4.0^\circ/344^\circ/163^\circ$   $Srp=0.98$   
 1993.015.11.01.05.802.IU.YSS..LHN.SAC ( 1993/01/15)  
 $ScS_2$ - $ScS_1$  travel time: 935.5  $\tau$ : 56.2 s  
 Centroid: 43.060 144.290 100.0 km Mw 7.6  
 $Q = 194$   $t^* = 4.8$  s  
 Quality control: signal/noise  $ScS_1$ : 15.54  $ScS_2$  5.76 Correlation : 0.970

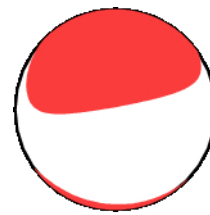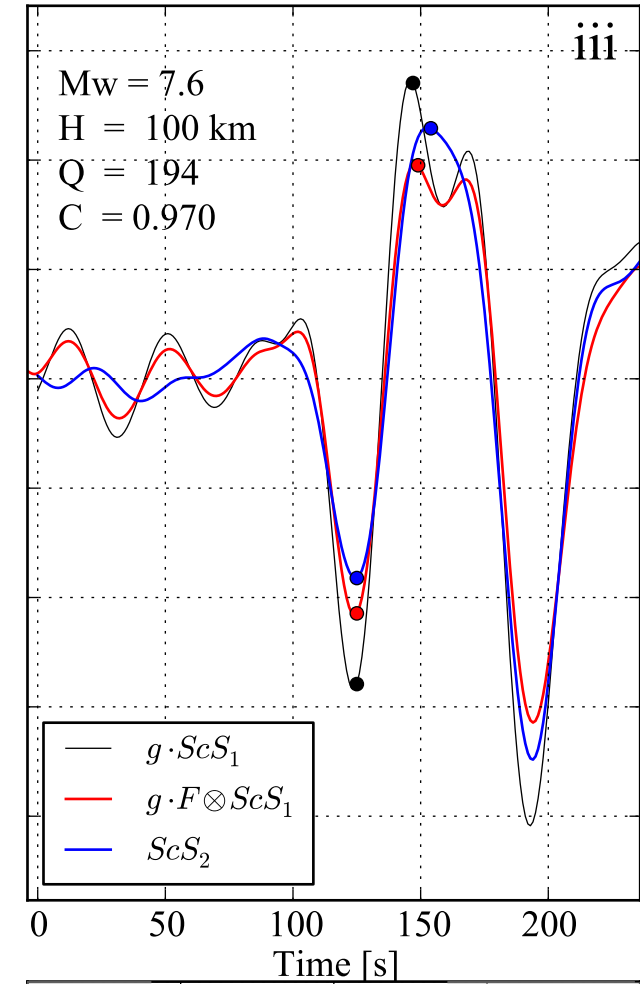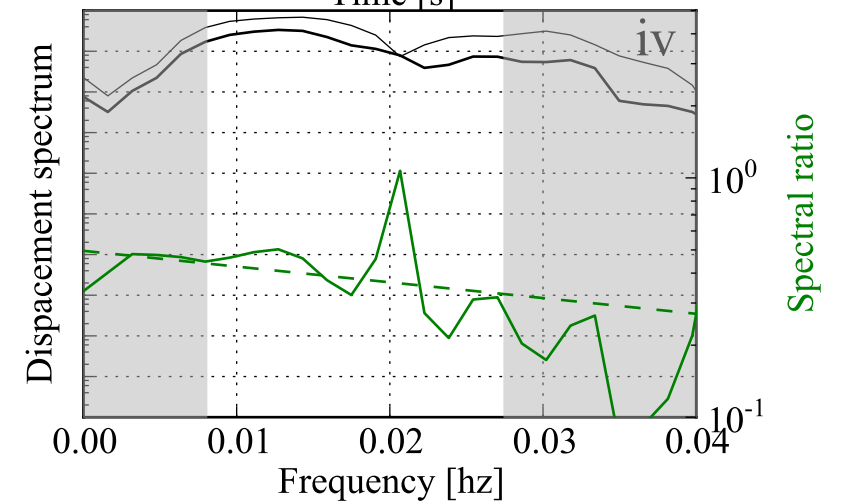

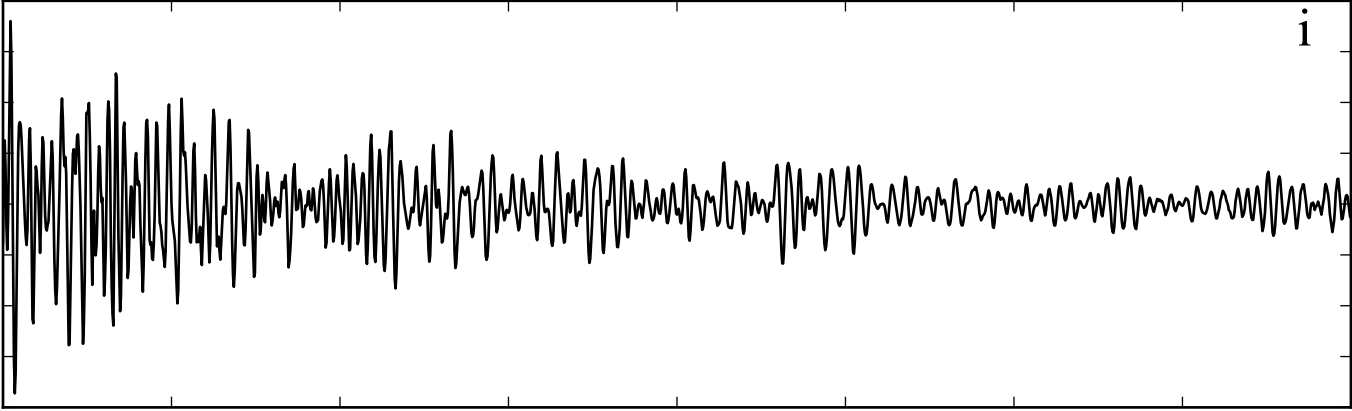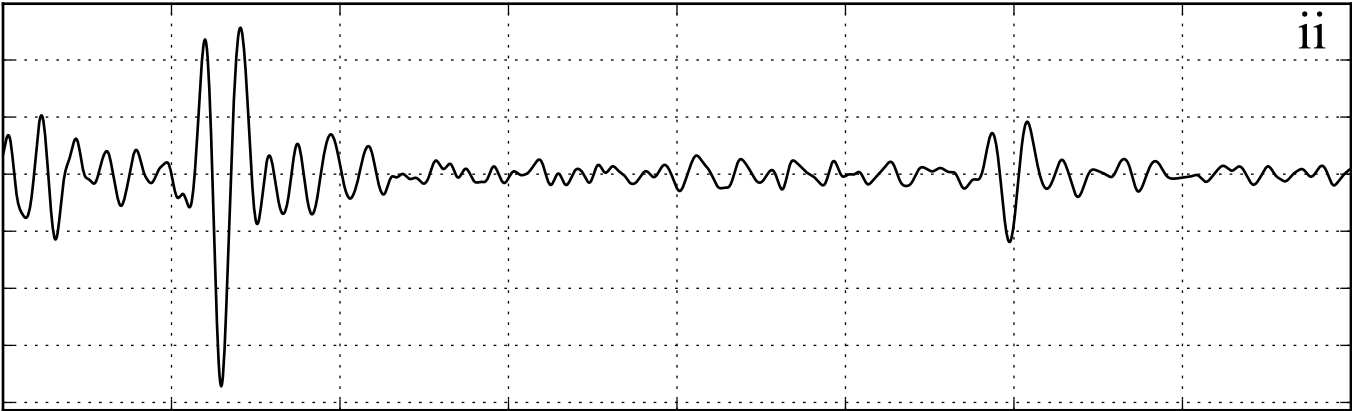

Time [s]

IU - YSS - - LHE  $\Delta/Az/Baz = 4.8^\circ/311^\circ/128^\circ$  Srp=0.80  
1994.282.07.50.38.528.IU.YSS..LHE.SAC (1994/10/09)  
 $ScS_2$ - $ScS_1$  travel time: 935.3  $\tau$ : 43.7 s  
Centroid: 43.870 147.960 33.2 km Mw 7.2  
 $Q = 169$   $t^* = 5.5$  s  
Quality control: signal/noise  $ScS_1$ : 14.40  $ScS_2$  4.83 Correlation : 0.945

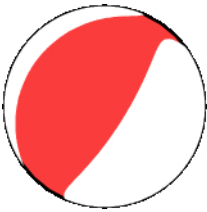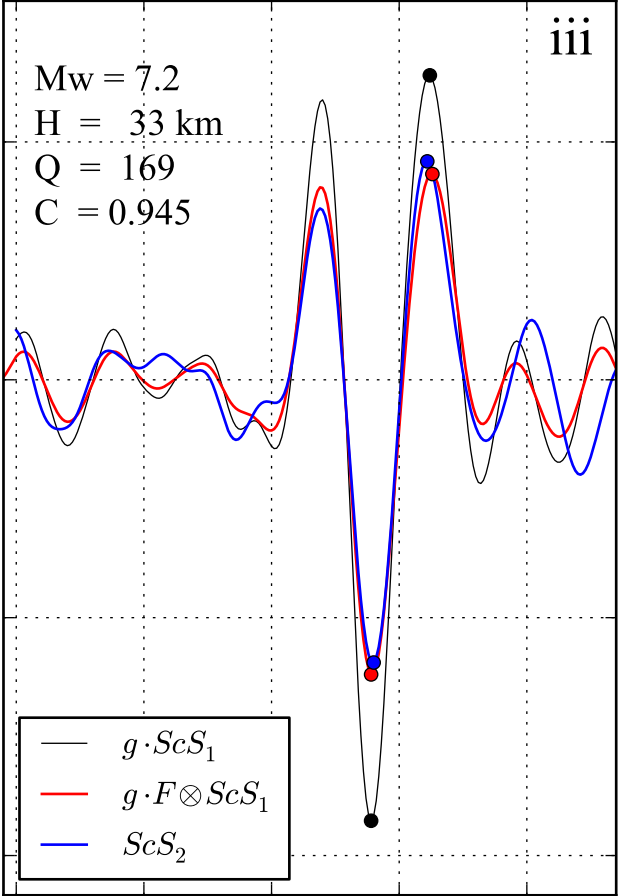

Time [s]

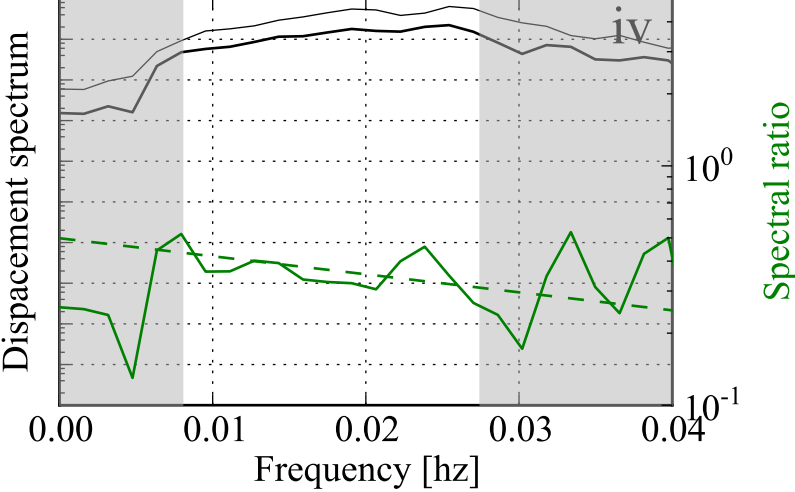

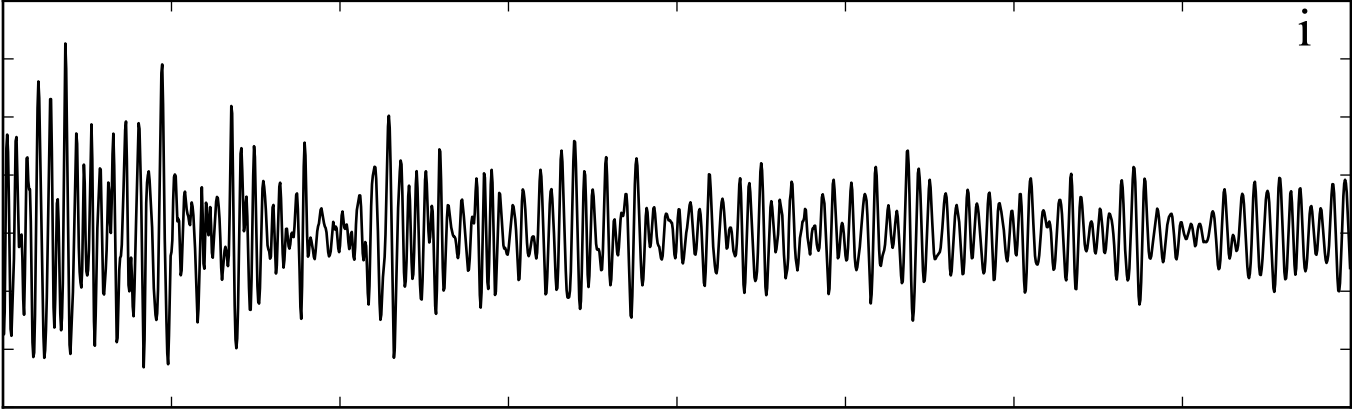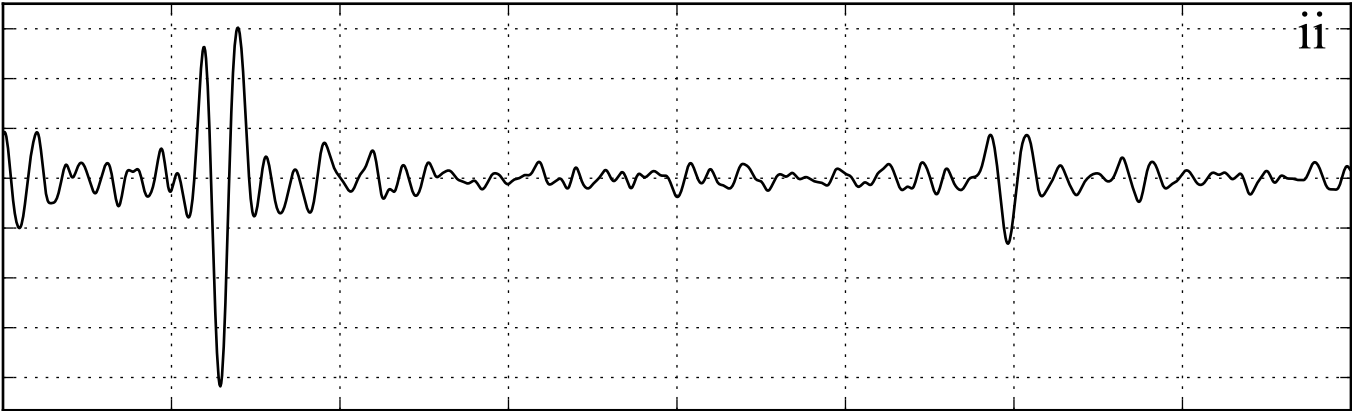

Time [s]

IU - YSS - - LHE  $\Delta/Az/Baz = 4.9^\circ/309^\circ/125^\circ$  Srp=0.74  
1995.118.16.25.00.329.IU.YSS..LHE.SAC ( 1995/04/28)  
 $ScS_2$ - $ScS_1$  travel time: 936.2  $\tau$ : 42.3 s  
Centroid: 43.980 148.250 33.8 km Mw 6.9  
 $Q = 147$   $t^* = 6.3$  s  
Quality control: signal/noise  $ScS_1$ : 15.25  $ScS_2$  4.92 Correlation : 0.929

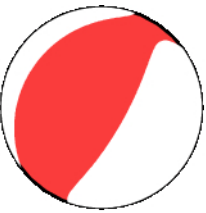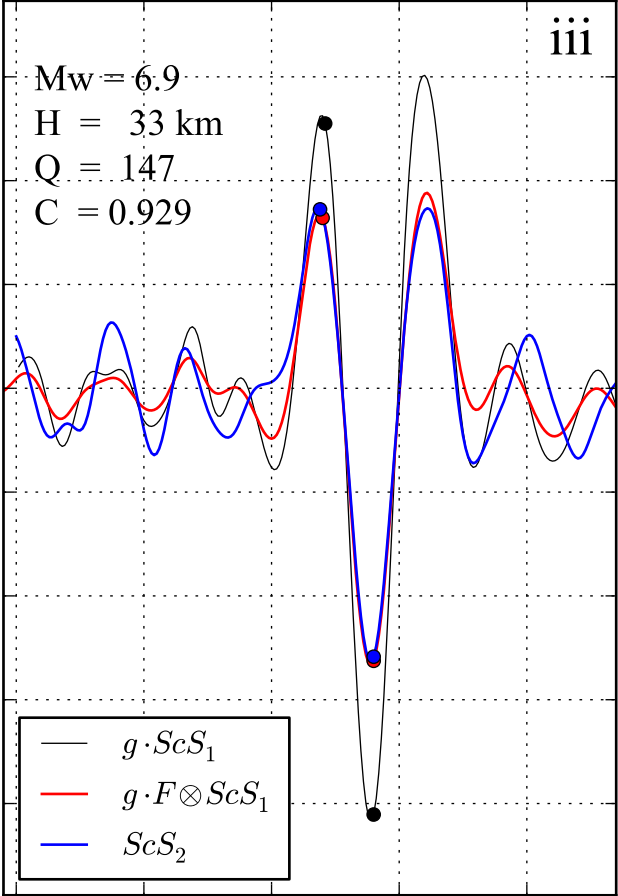

Time [s]

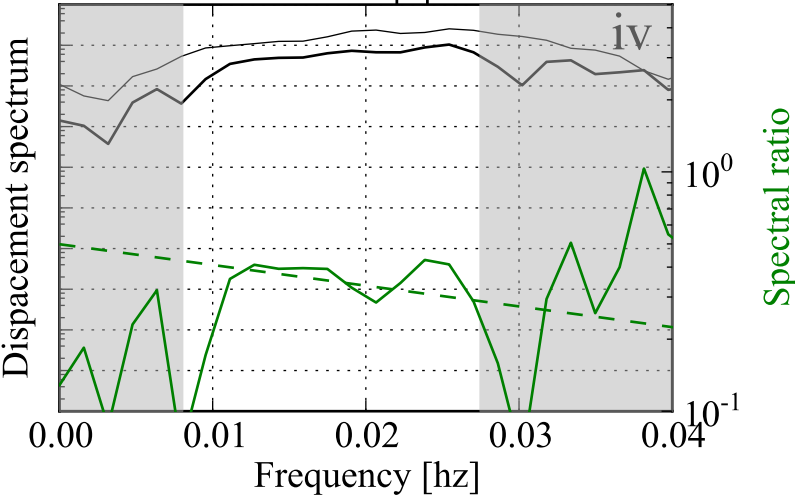

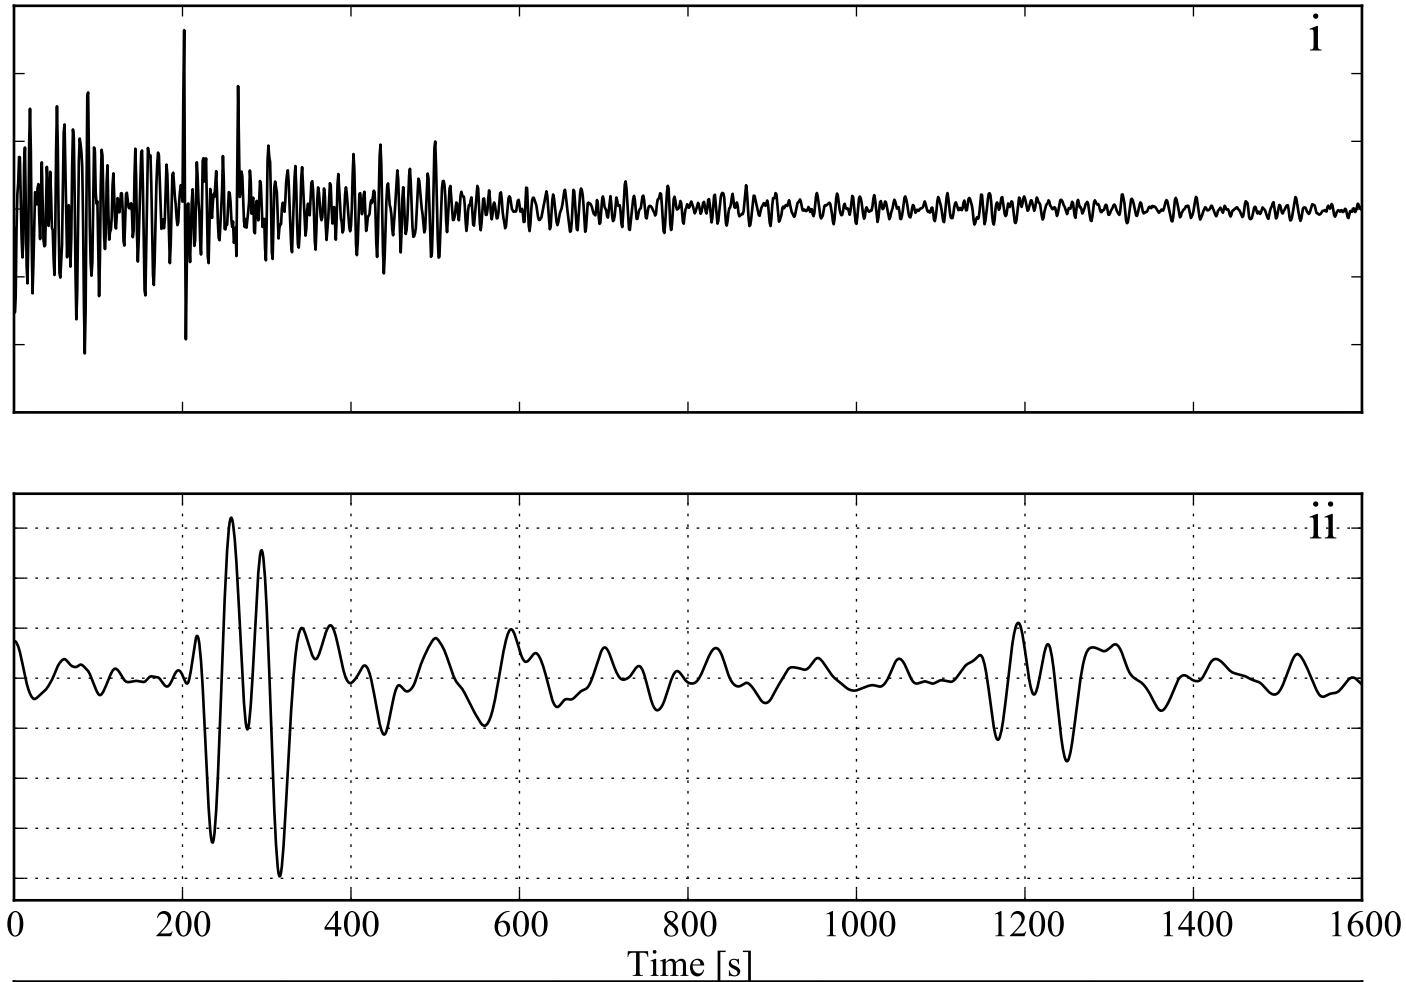

IU - YSS - - LHN  $\Delta/Az/Baz = 4.4^\circ/294^\circ/110^\circ$   $Srp=0.97$   
 1996.053.14.54.09.178.IU.YSS..LHN.SAC ( 1996/02/22)  
 $ScS_2-ScS_1$  travel time: 933.5  $\tau$ : 44.1 s  
 Centroid: 45.290 148.560 130.3 km Mw 6.3  
 $Q = 202$   $t^* = 4.6$  s  
 Quality control: signal/noise  $ScS_1$ : 9.22  $ScS_2$  3.32 Correlation : 0.951

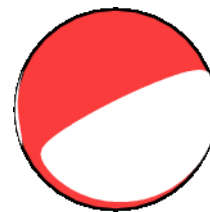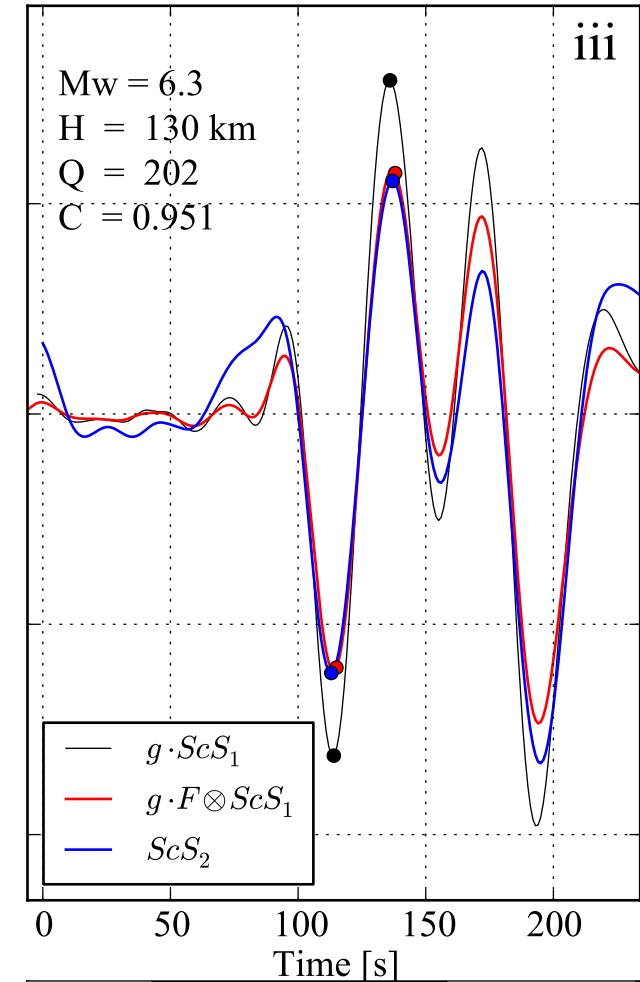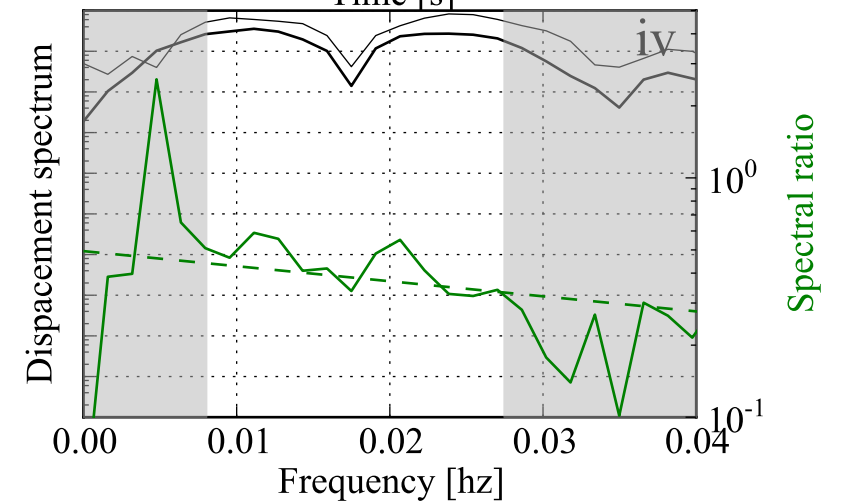

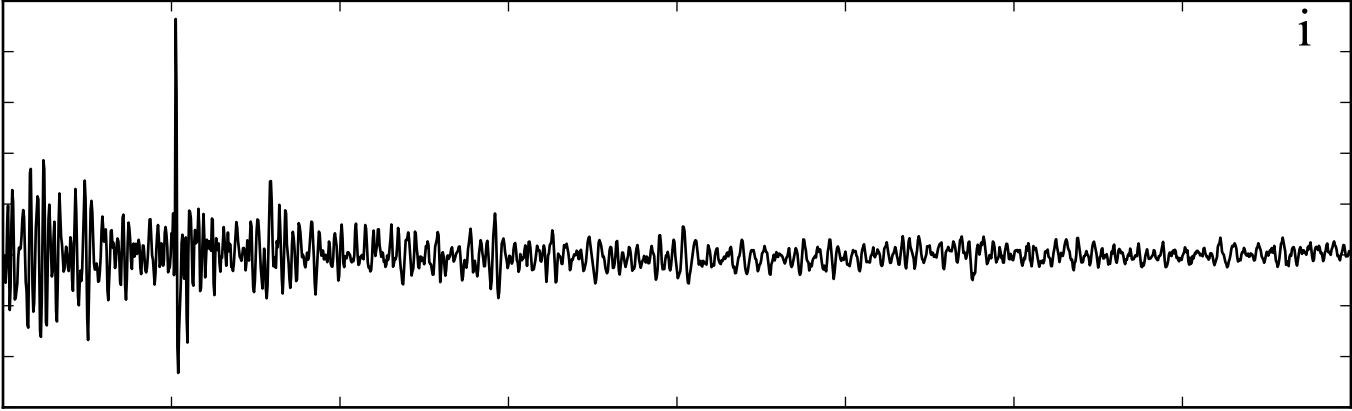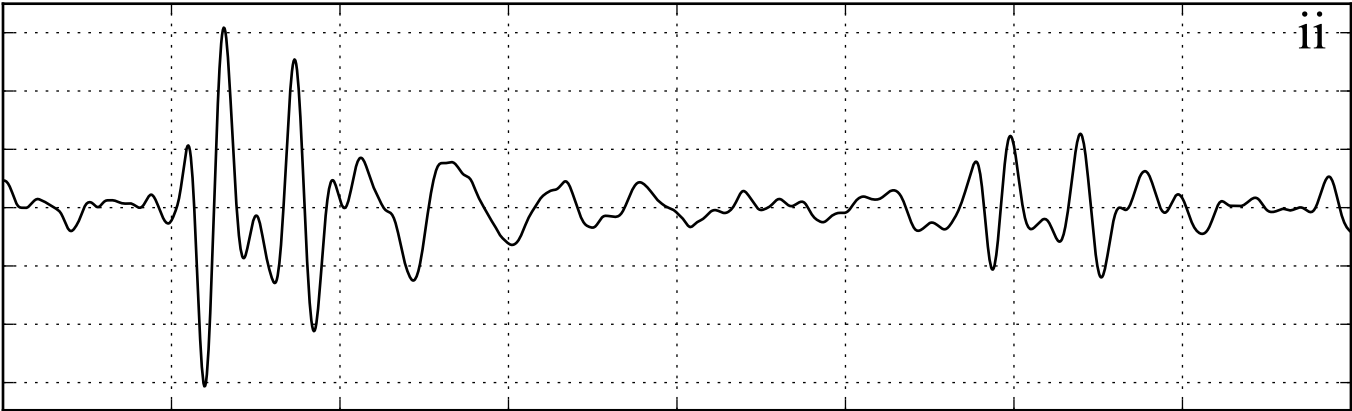

Time [s]

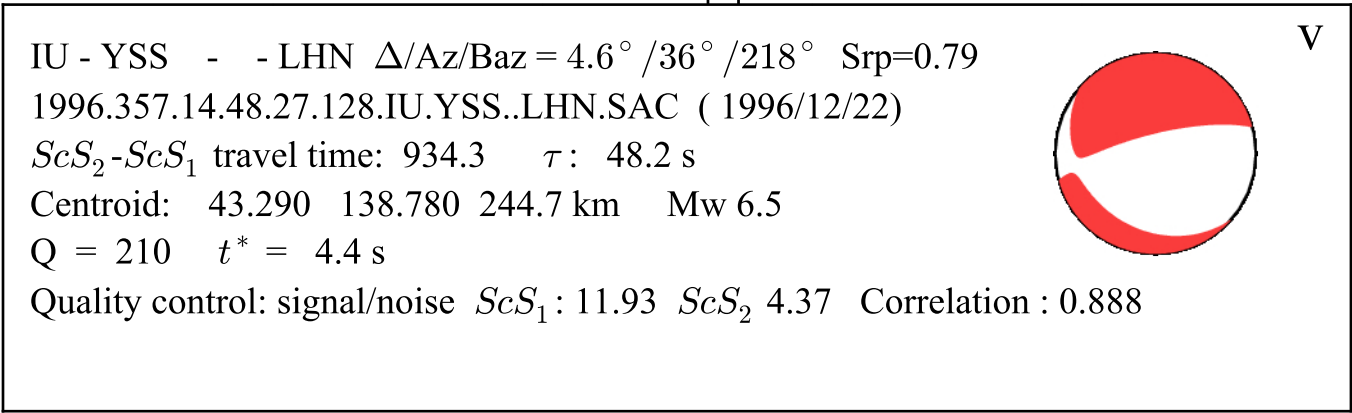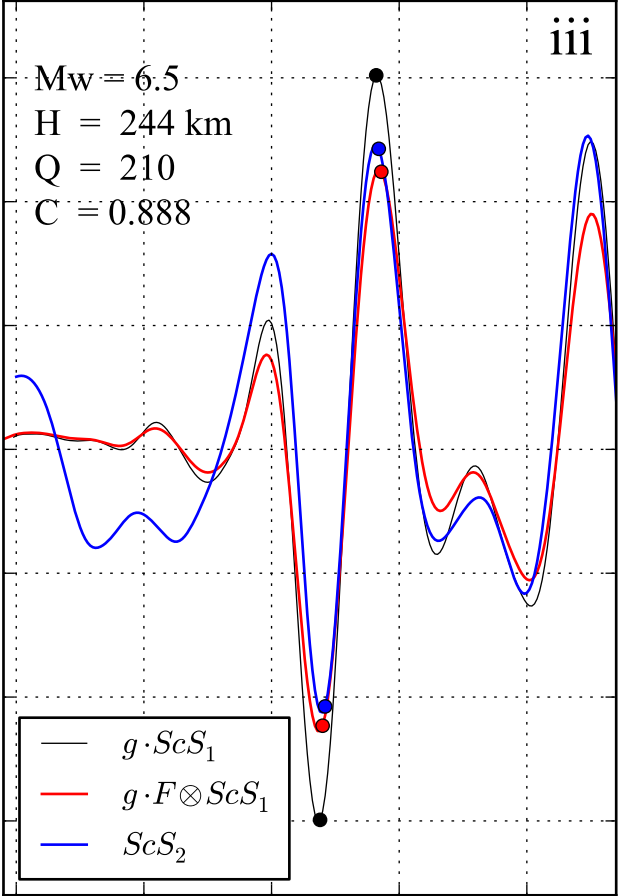

Time [s]

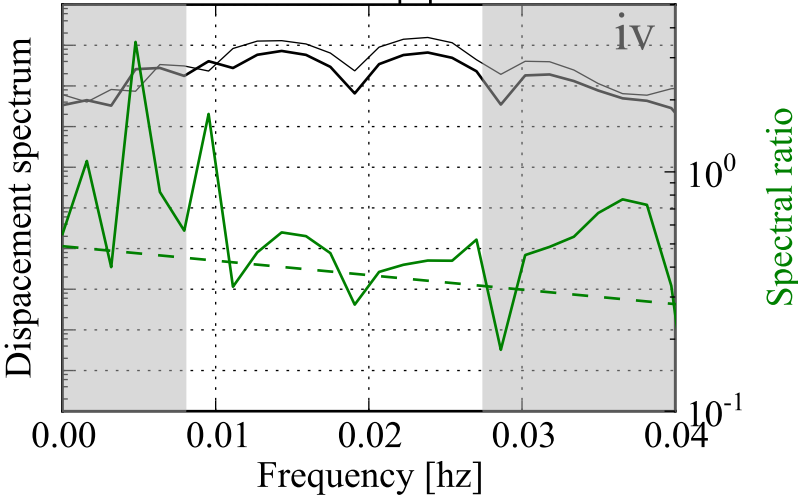



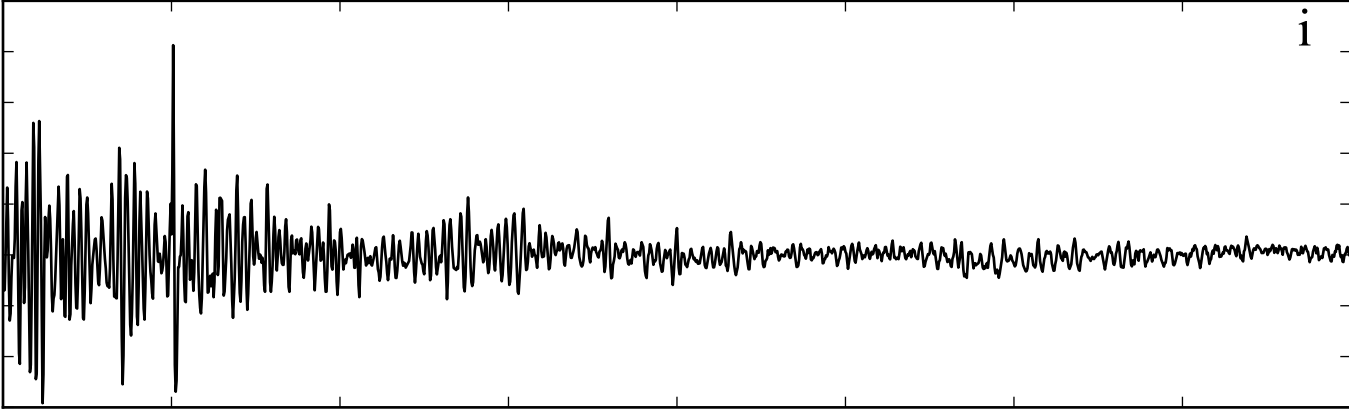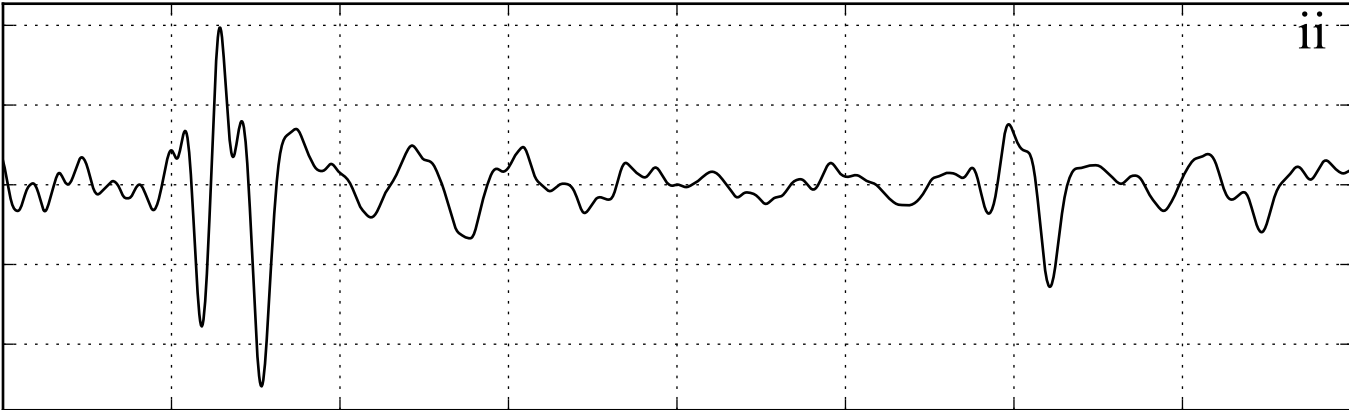

Time [s]

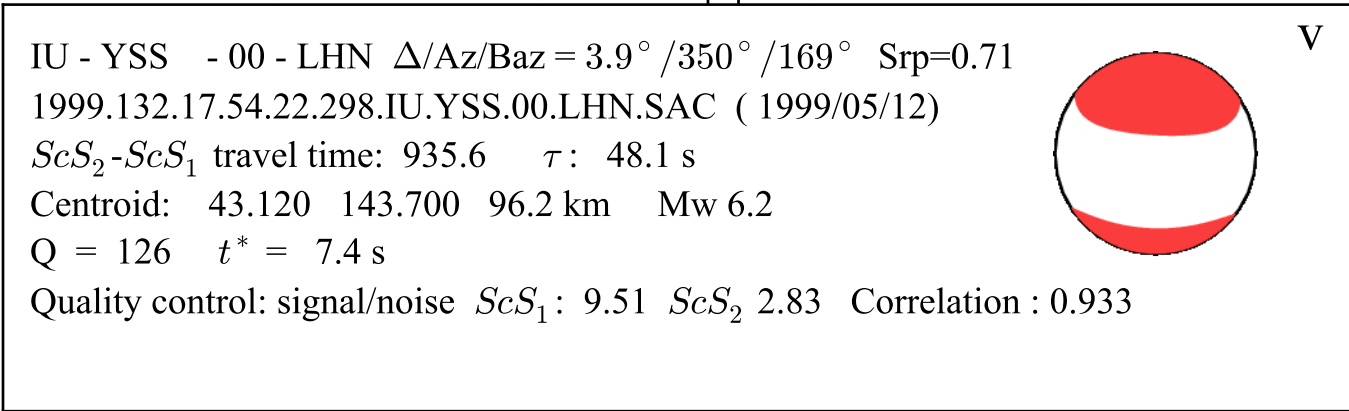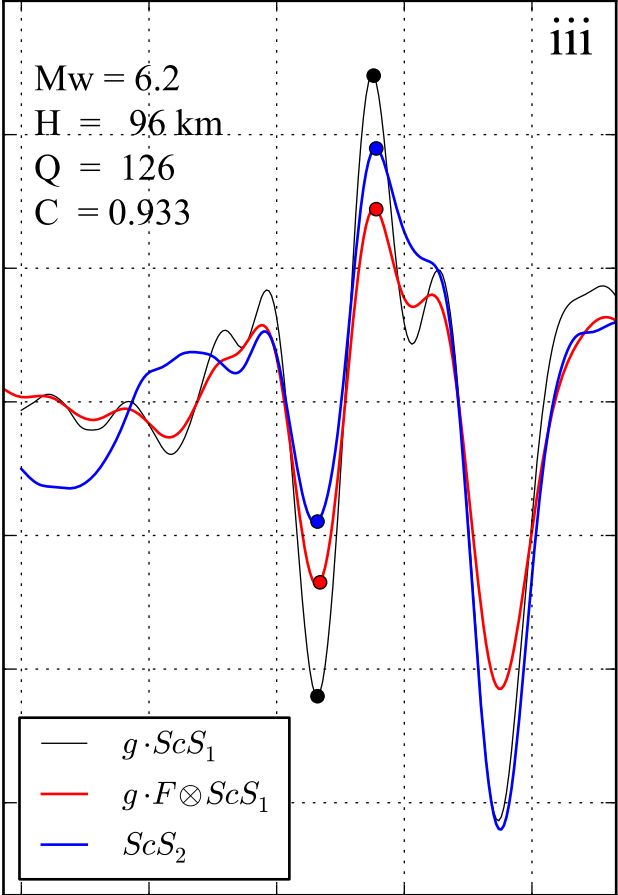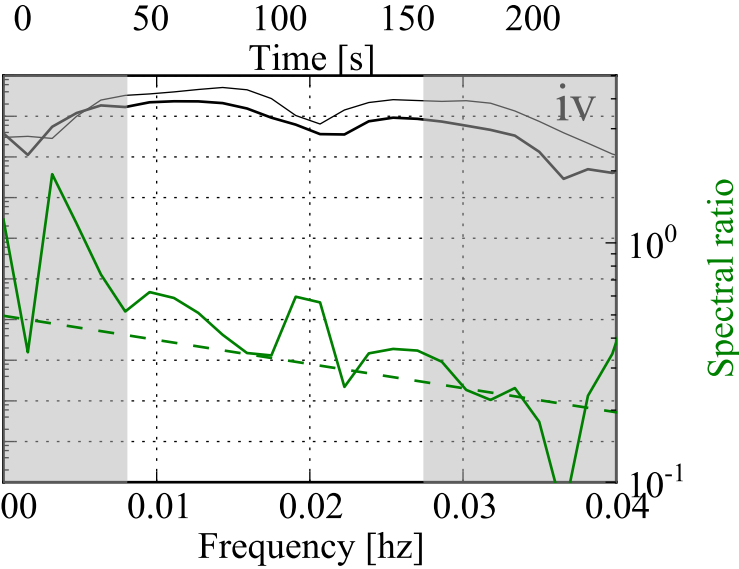

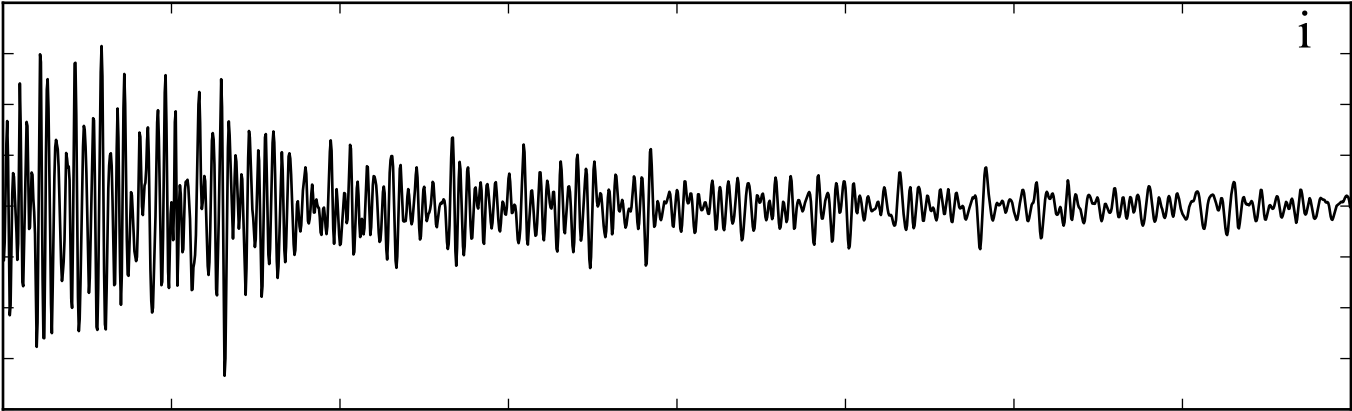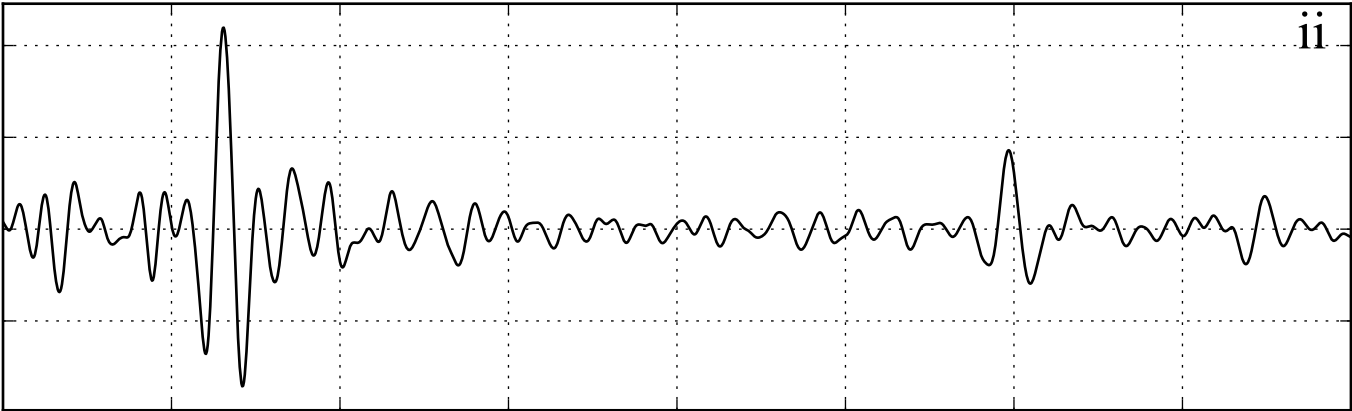

Time [s]

IU - YSS - 00 - LHN  $\Delta/Az/Baz = 4.8^\circ/324^\circ/142^\circ$   $Srp=0.75$   
2000.028.14.16.07.948.IU.YSS.00.LHN.SAC ( 2000/01/28)  
 $ScS_2-ScS_1$  travel time: 932.2  $\tau$ : 46.0 s  
Centroid: 43.080 146.810 50.0 km Mw 6.8  
 $Q = 174$   $t^* = 5.3$  s  
Quality control: signal/noise  $ScS_1$ : 11.21  $ScS_2$  3.98 Correlation : 0.899

v



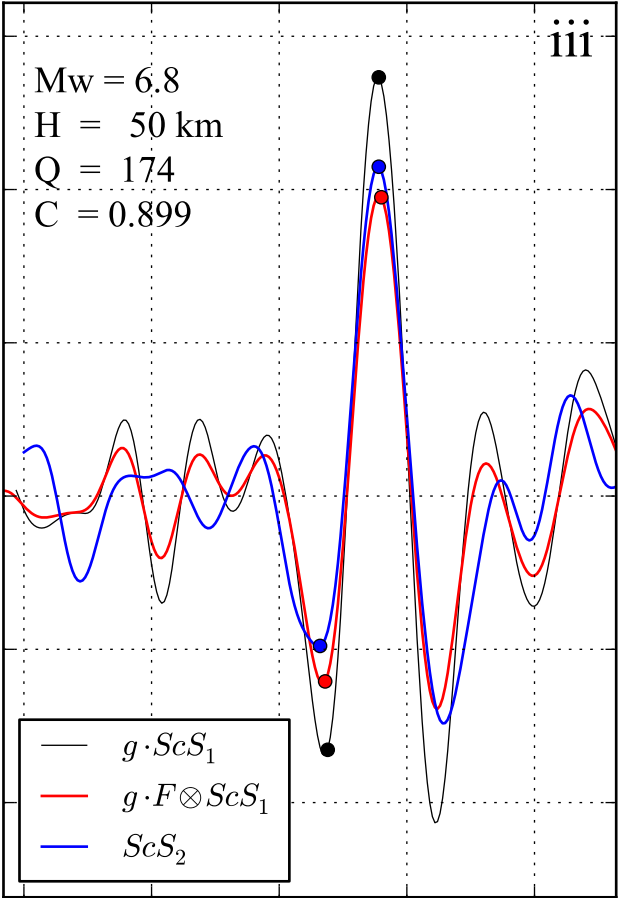

Time [s]

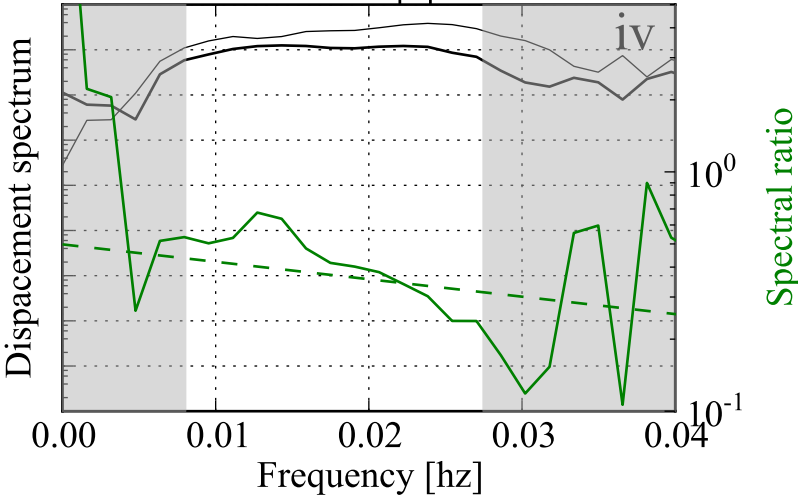

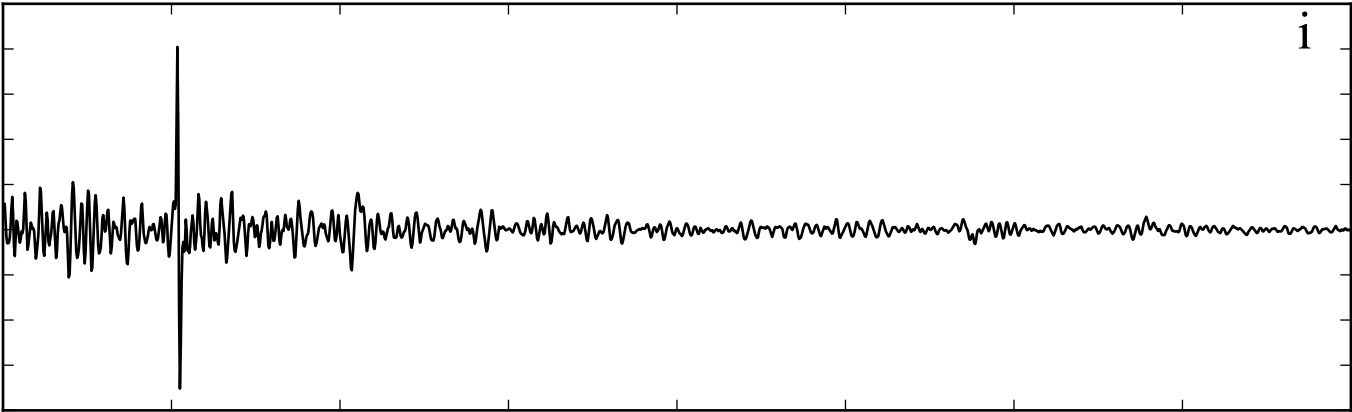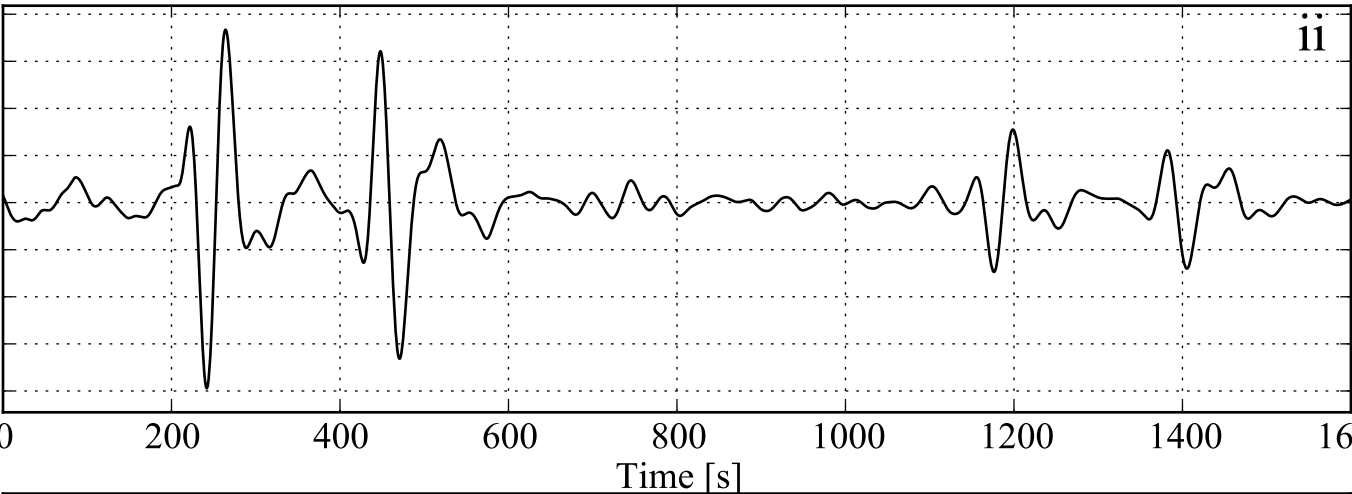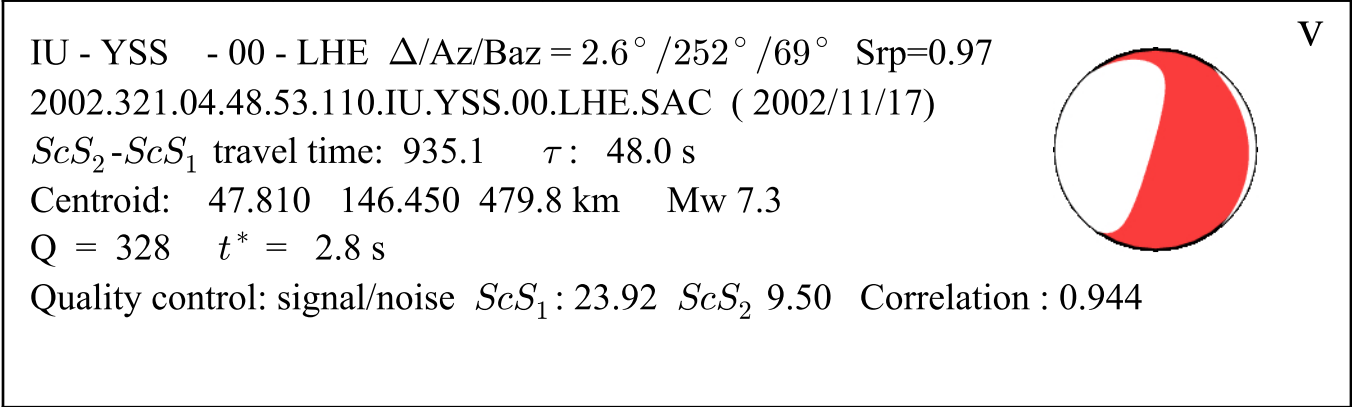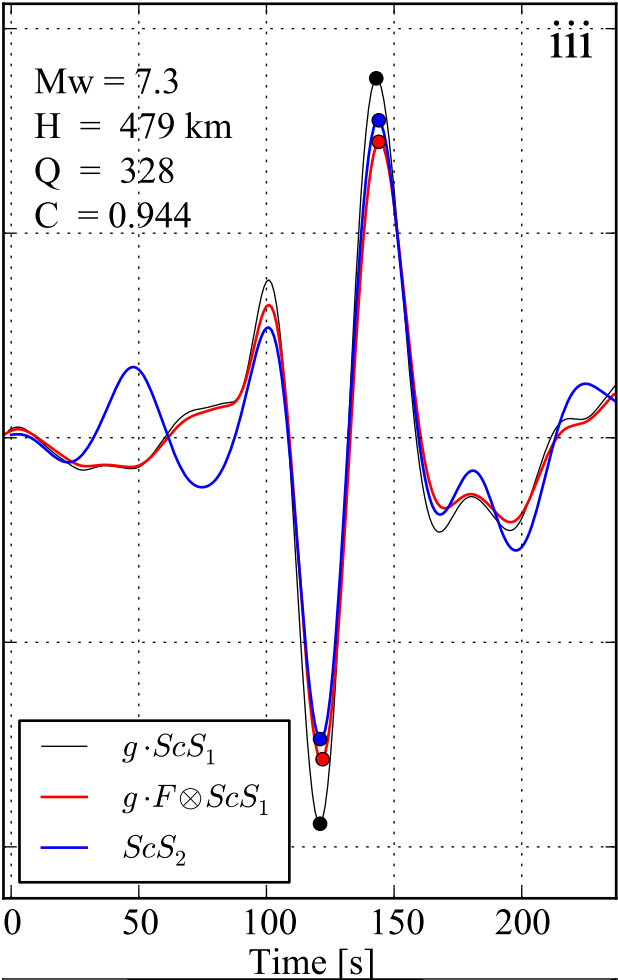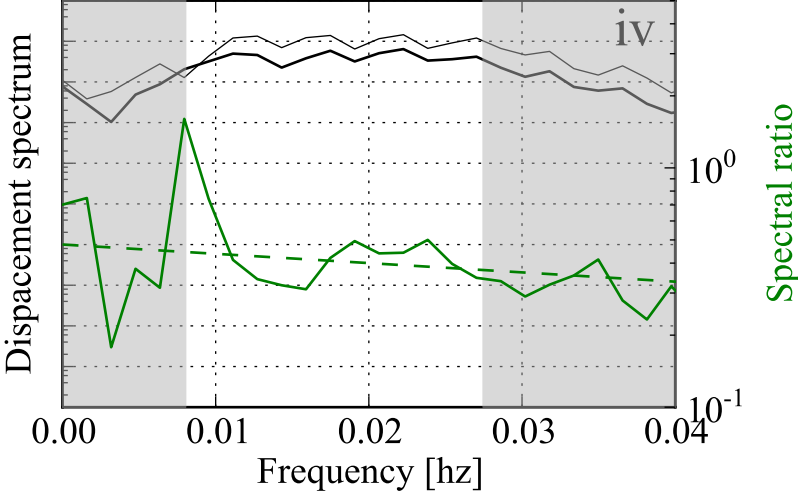

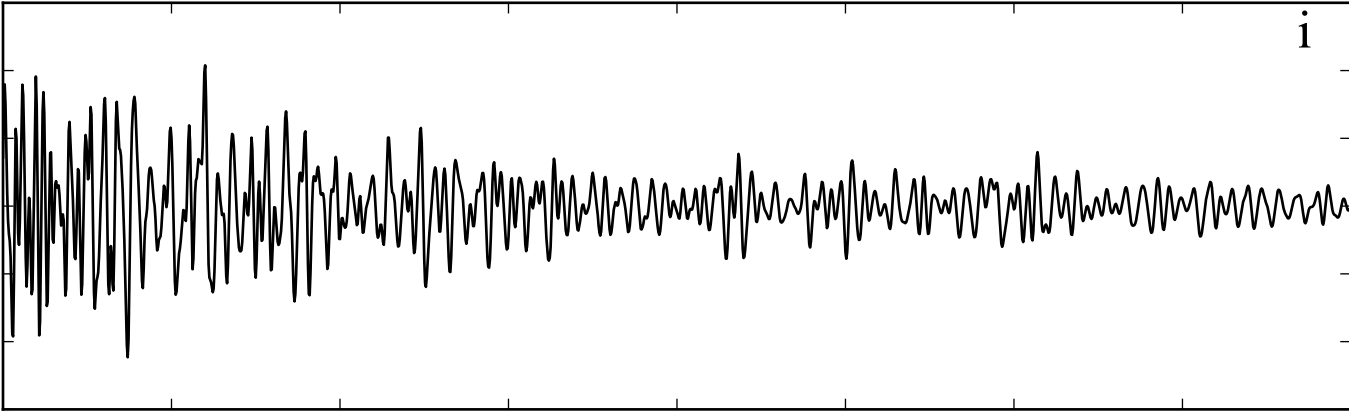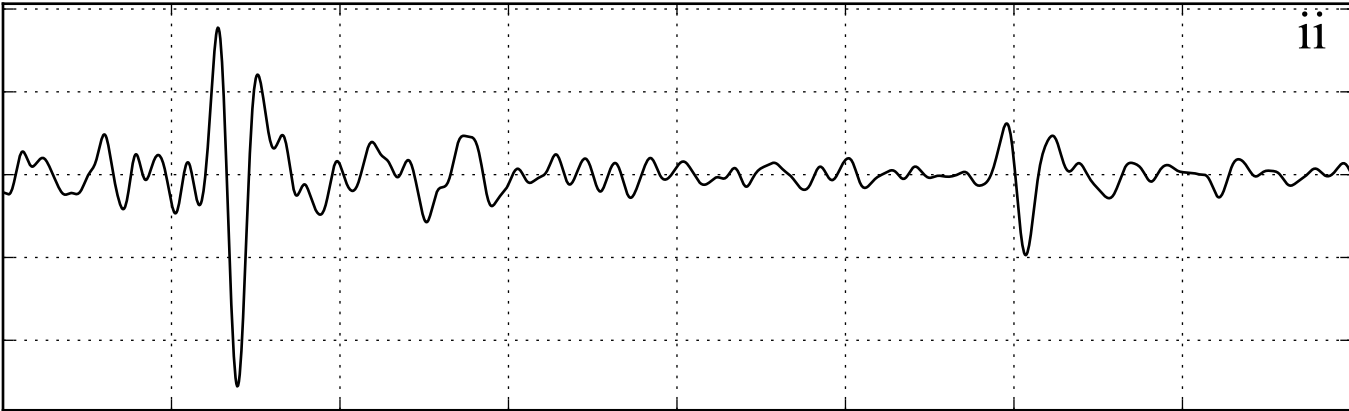

Time [s]

iu - YSS - 00 - LHE  $\Delta/Az/Baz = 4.8^\circ/351^\circ/170^\circ$   $Srp=0.95$   
2003.268.19.45.06.297.IU.YSS.00.LHE.SAC ( 2003/09/25)  
 $ScS_2$ - $ScS_1$  travel time: 936.2  $\tau$ : 49.6 s  
Centroid: 42.210 143.840 28.2 km Mw 8.3  
 $Q = 182$   $t^* = 5.1$  s  
Quality control: signal/noise  $ScS_1$ : 16.50  $ScS_2$  6.03 Correlation : 0.953

v

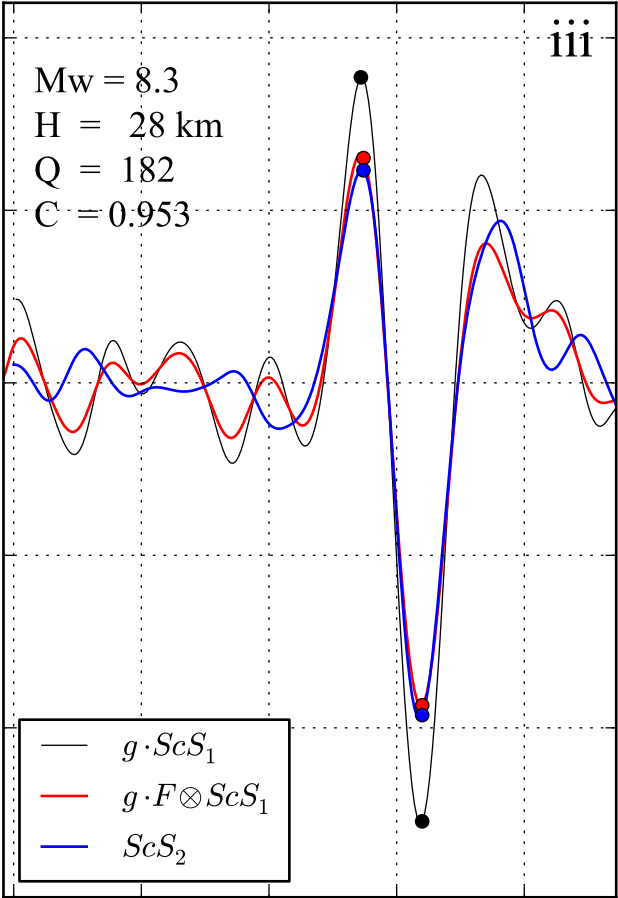

Time [s]

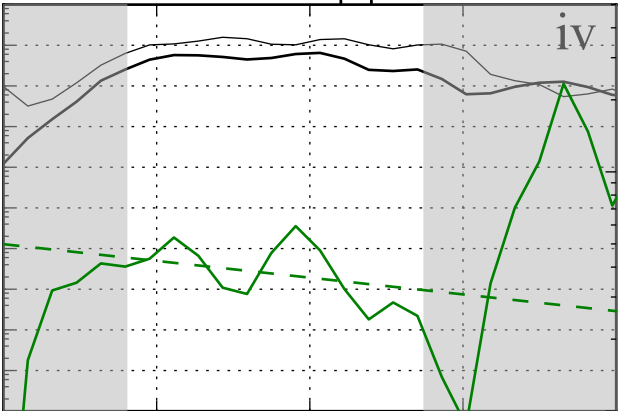

Frequency [hz]

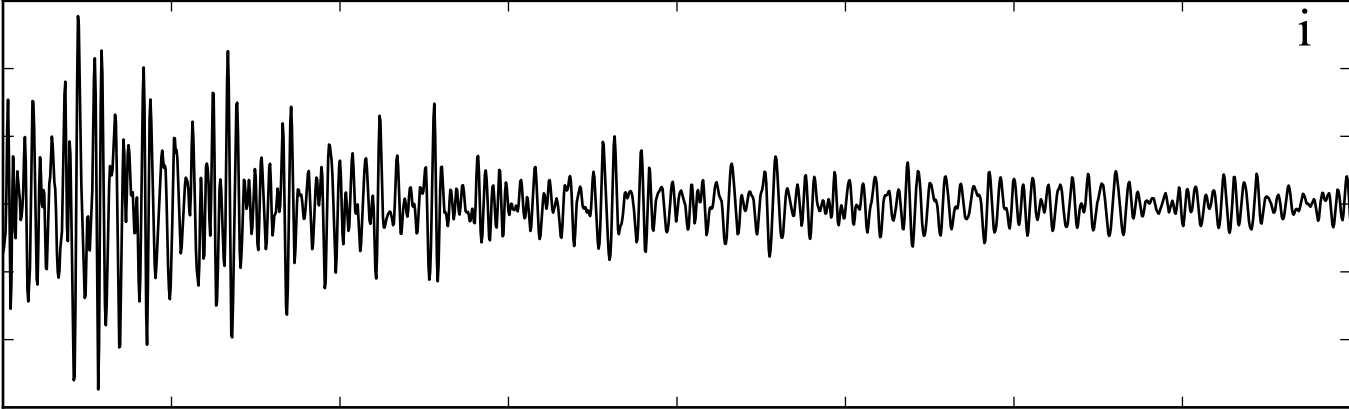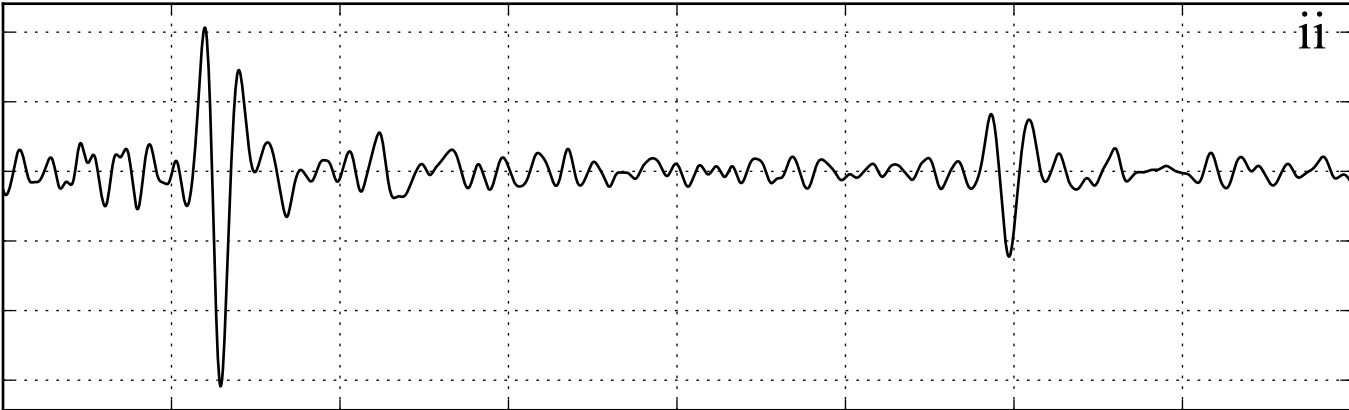

Time [s]

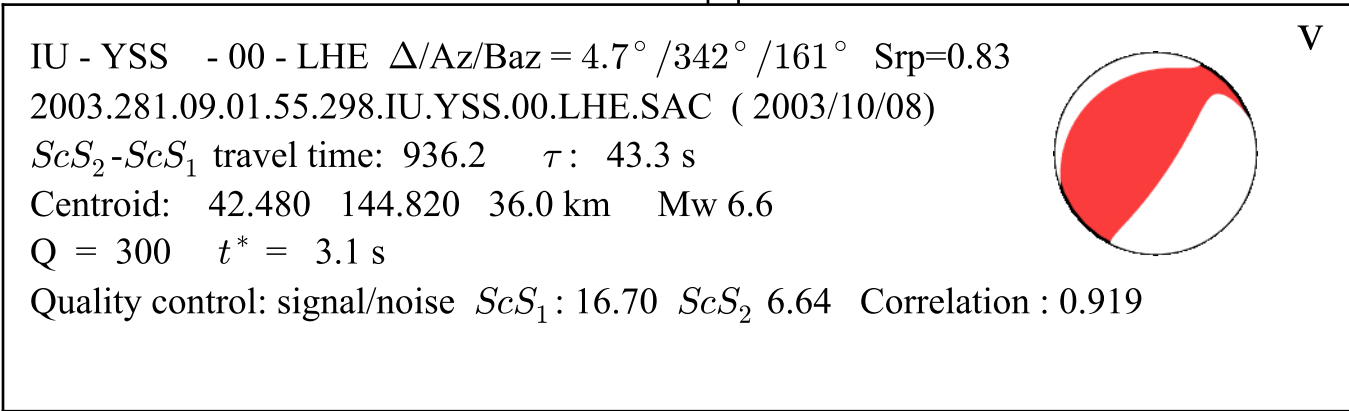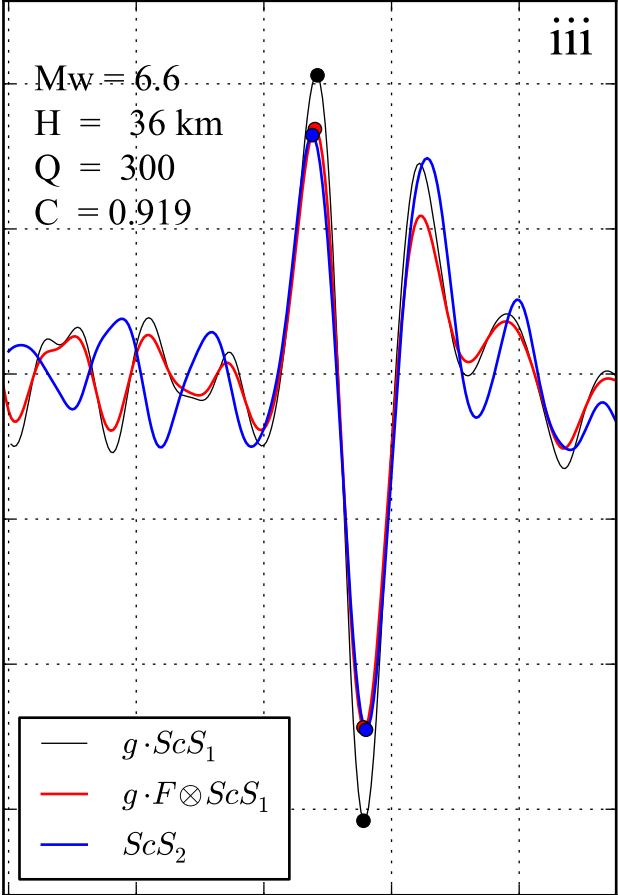

Time [s]

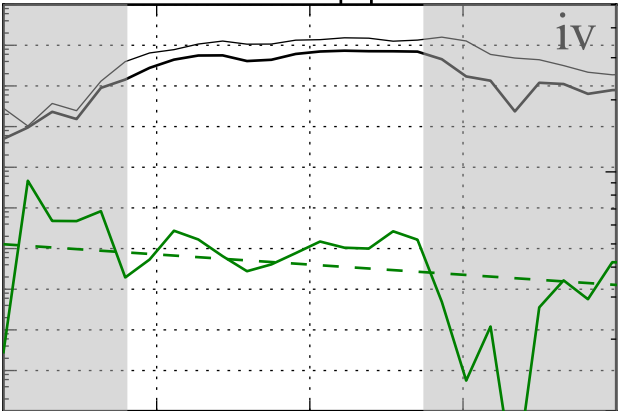

Frequency [hz]

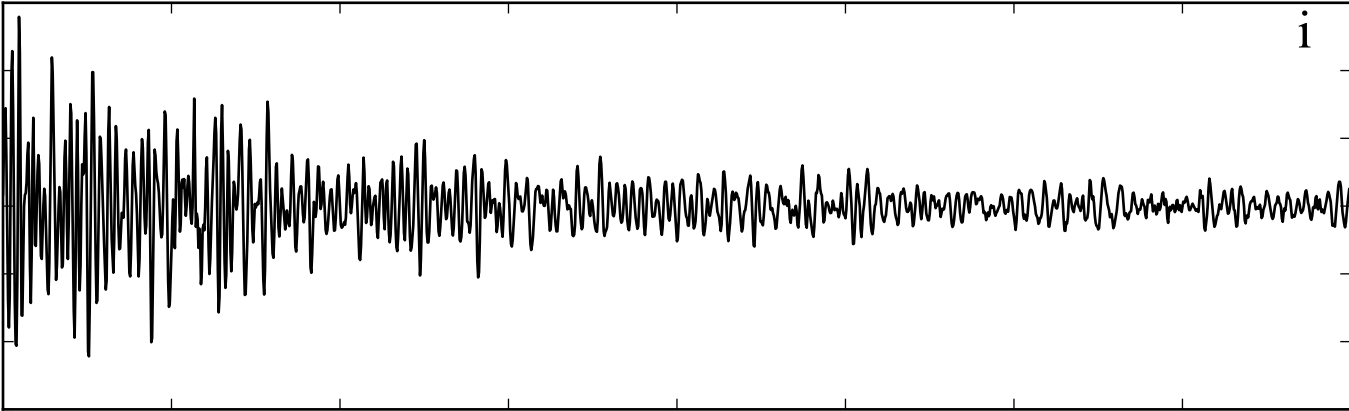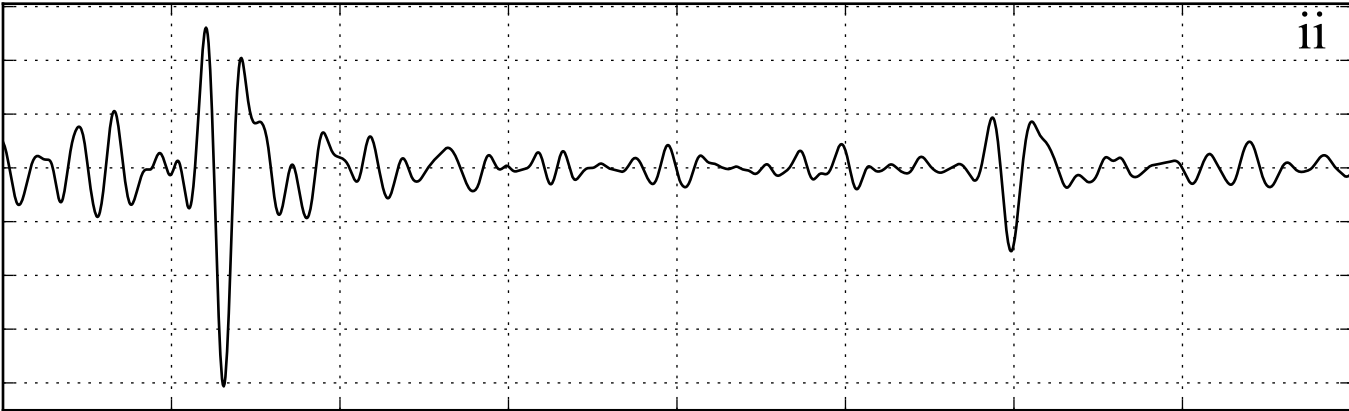

Time [s]

IU - YSS - 00 - LHE  $\Delta/Az/Baz = 4.5^\circ/336^\circ/154^\circ$   $Srp=0.70$   
2004.333.18.27.14.785.IU.YSS.00.LHE.SAC (2004/11/28)  
 $ScS_2-ScS_1$  travel time: 935.3  $\tau$ : 45.7 s  
Centroid: 42.880 145.360 47.0 km Mw 7.0  
 $Q = 210$   $t^* = 4.4$  s  
Quality control: signal/noise  $ScS_1$ : 14.49  $ScS_2$  5.39 Correlation : 0.943

v

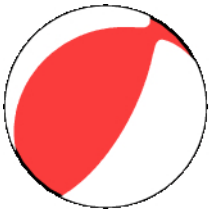

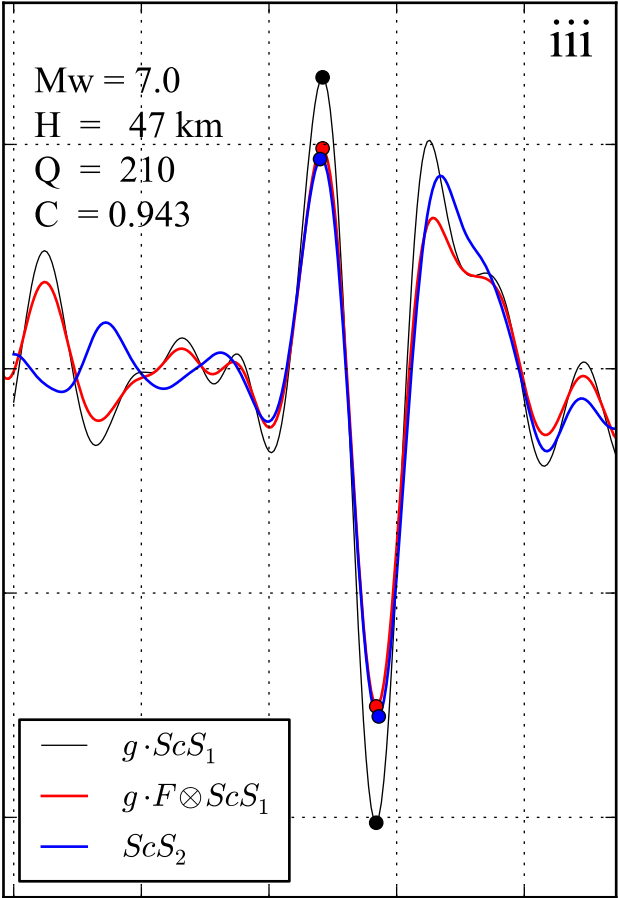

Time [s]

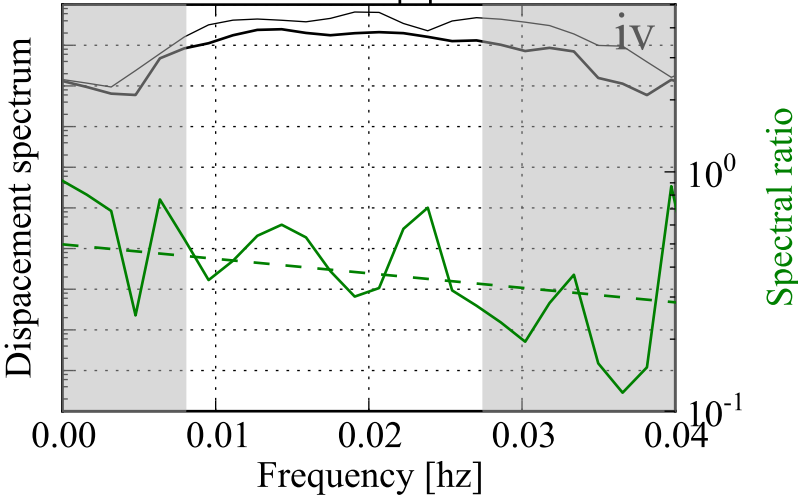

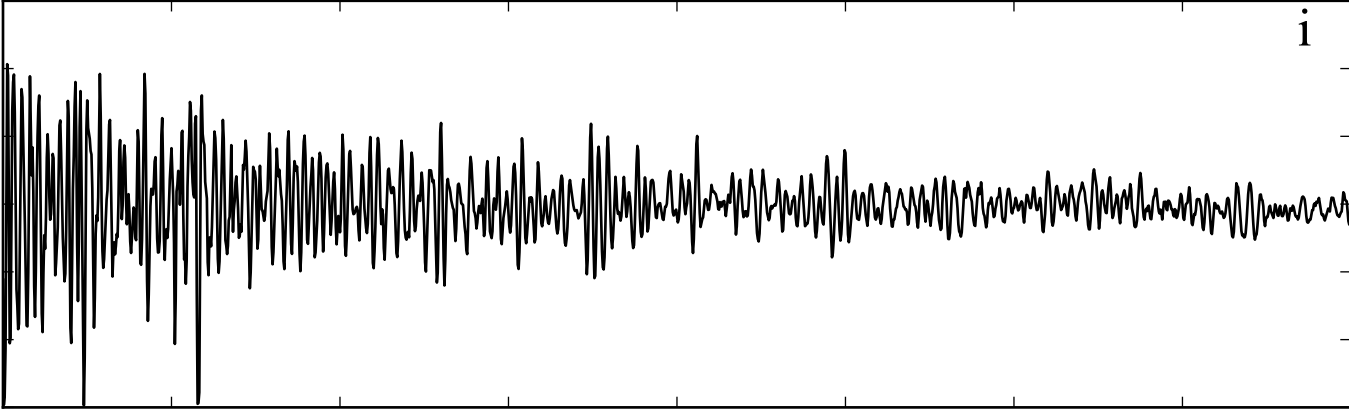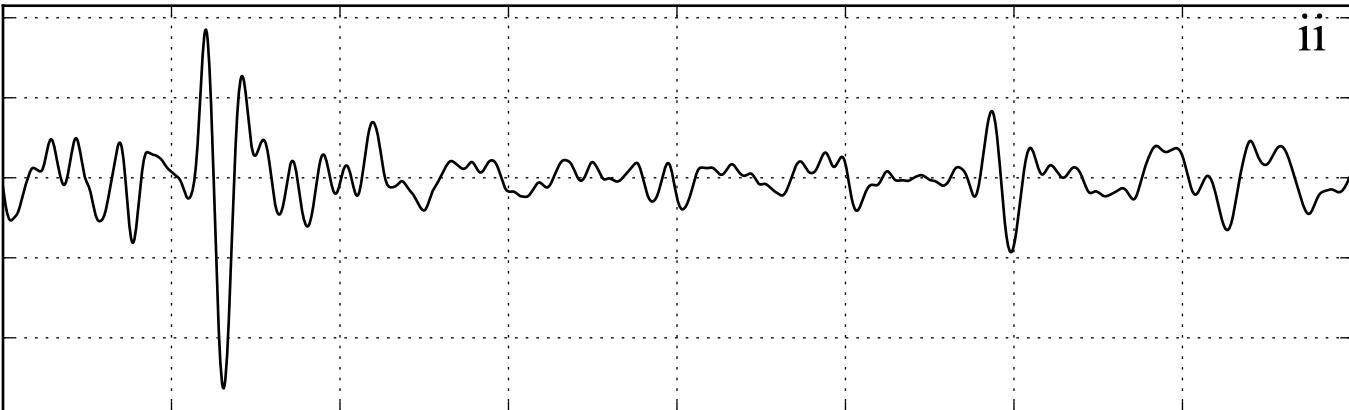

Time [s]

IU - YSS - 00 - LHE  $\Delta/Az/Baz = 4.5^\circ/339^\circ/157^\circ$  Srp=0.58  
2005.018.14.04.06.785.IU.YSS.00.LHE.SAC (2005/01/18)  
 $ScS_2$ - $ScS_1$  travel time: 934.3  $\tau$ : 46.1 s  
Centroid: 42.800 145.060 53.0 km Mw 6.2  
 $Q = 269$   $t^* = 3.5$  s  
Quality control: signal/noise  $ScS_1$ : 9.66  $ScS_2$  3.80 Correlation : 0.913

v

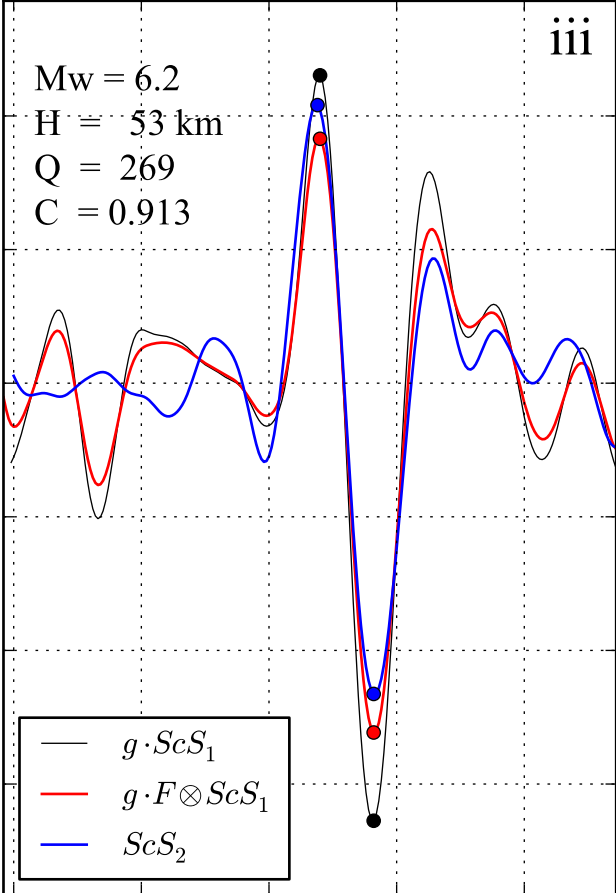

Time [s]

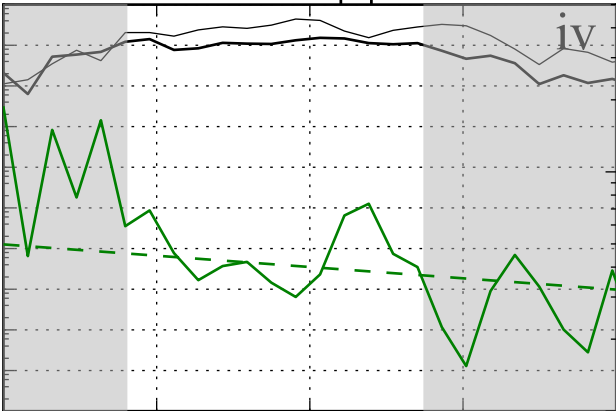

Frequency [hz]

Spectral ratio

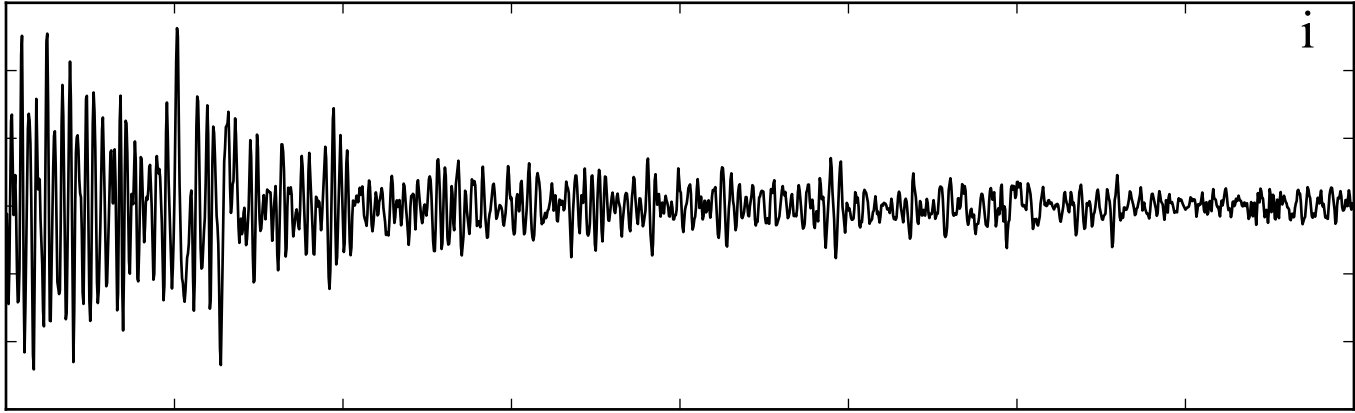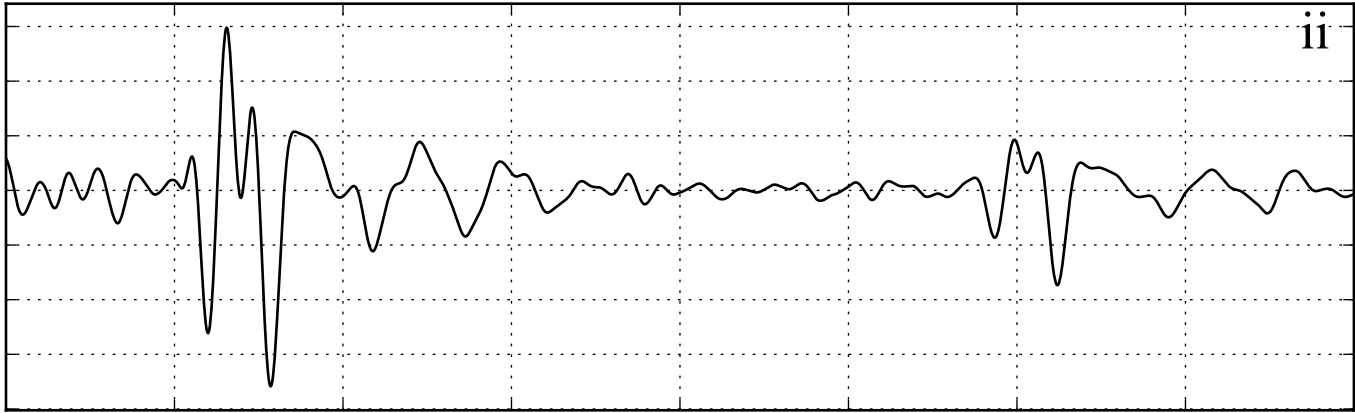

Time [s]

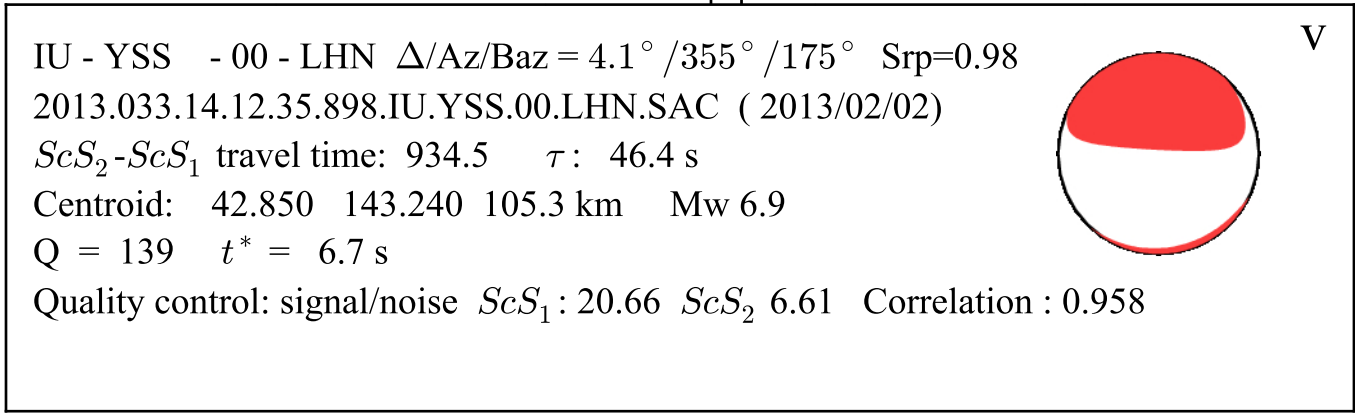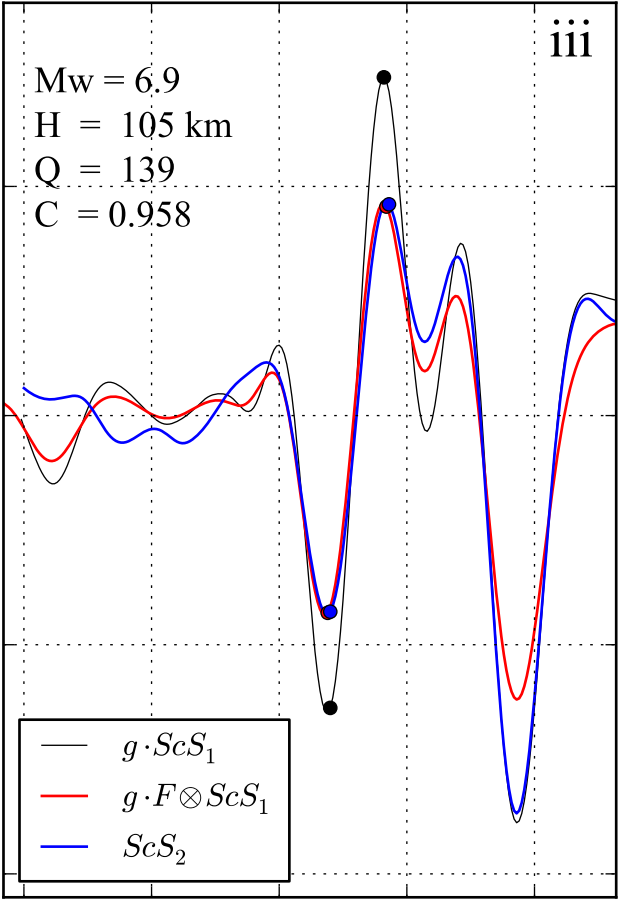

Time [s]

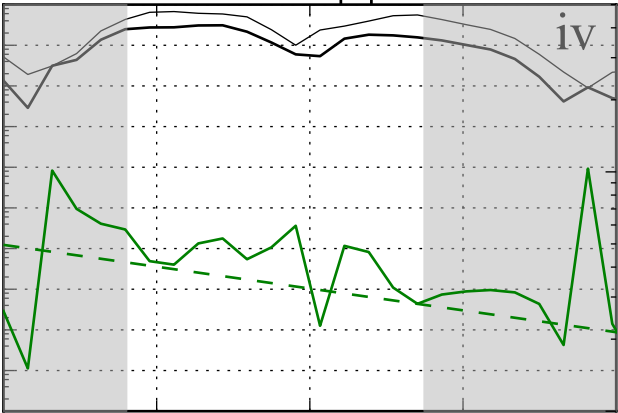

Frequency [hz]

Spectral ratio
