# Supplementary material
Source: publisher figshare collection journal article supplement (https://gsapubs.figshare.com/articles/dataset/_/12532547)

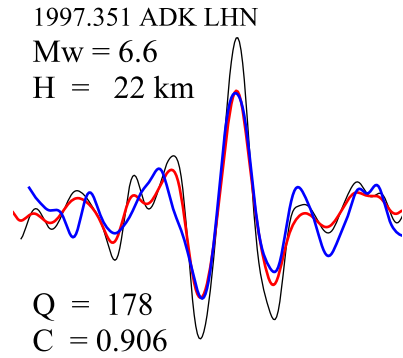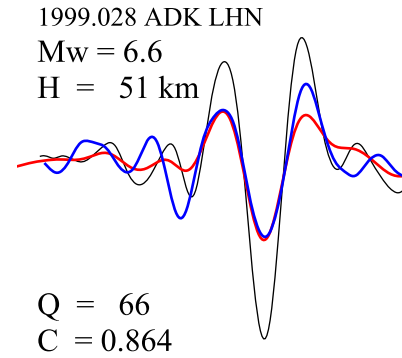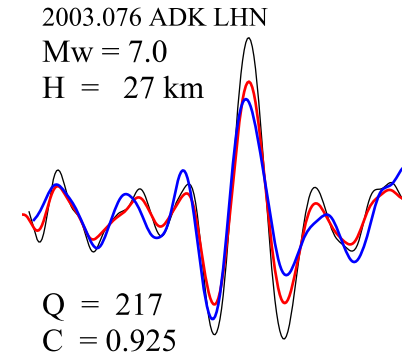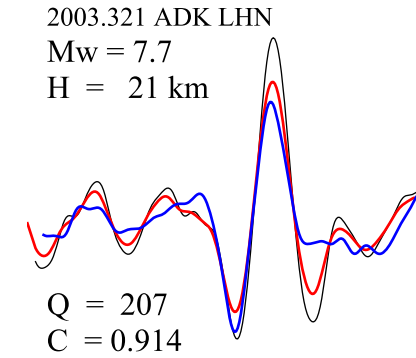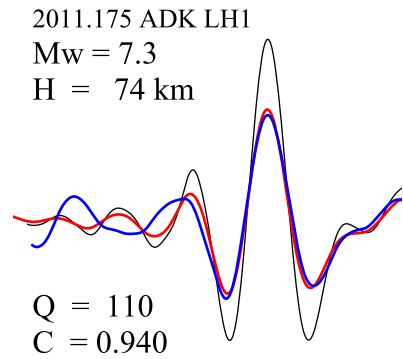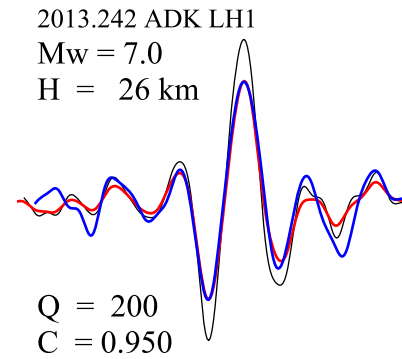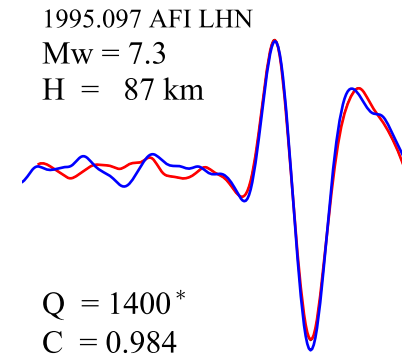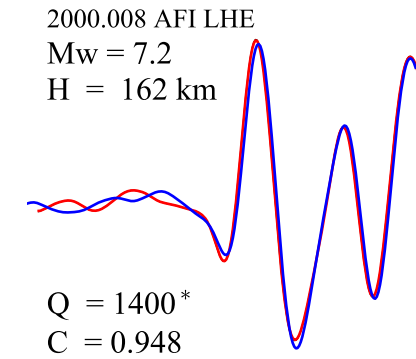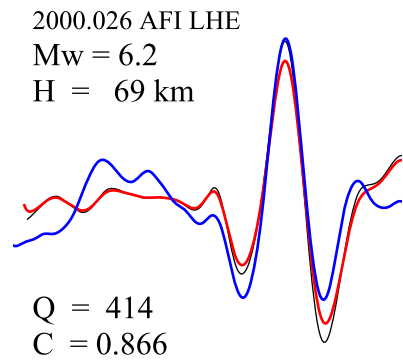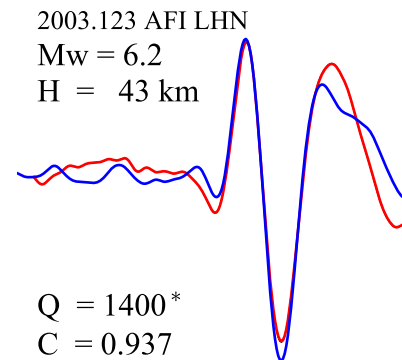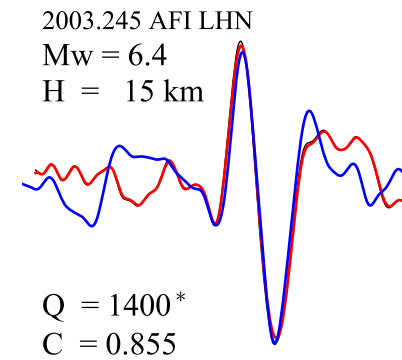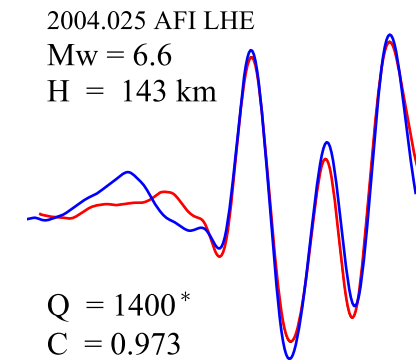

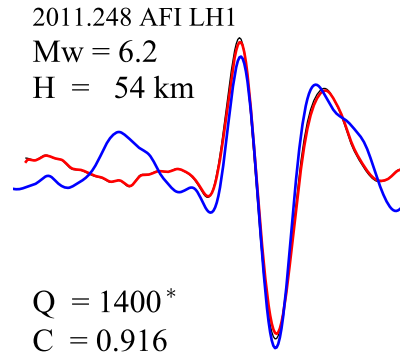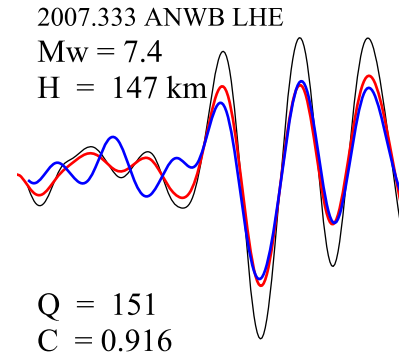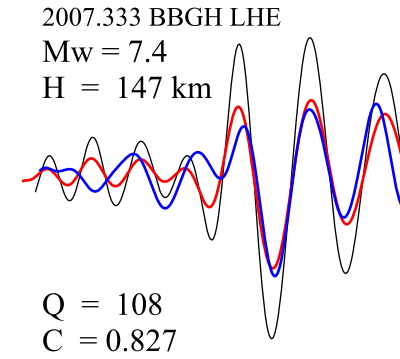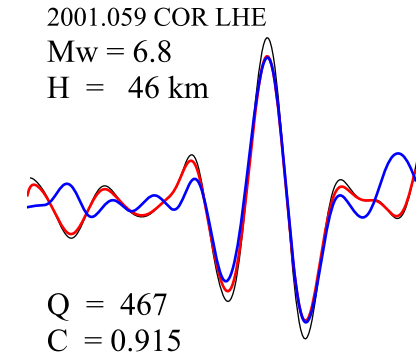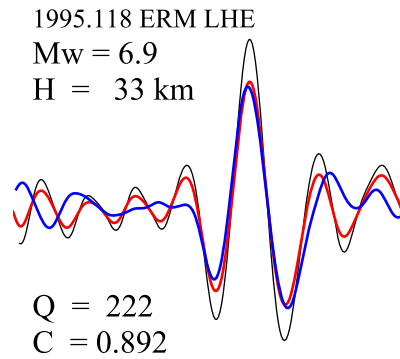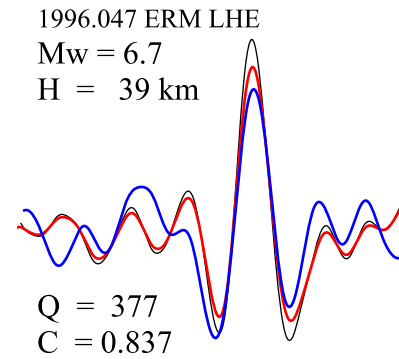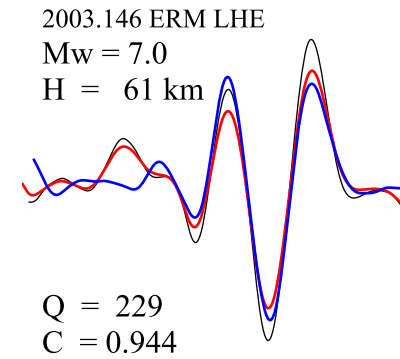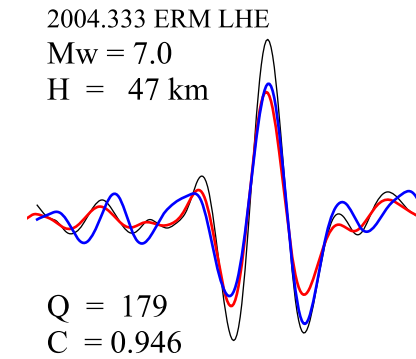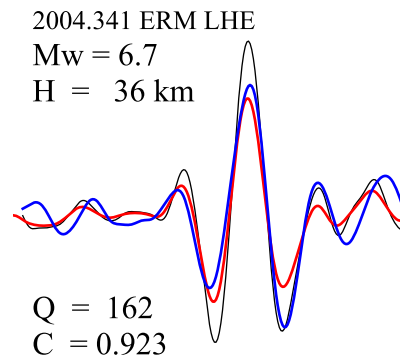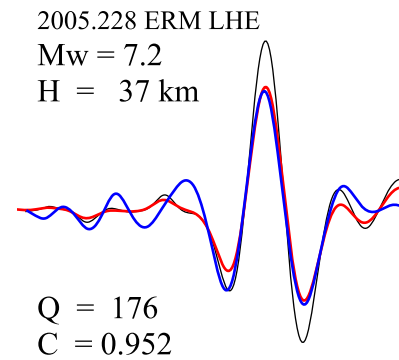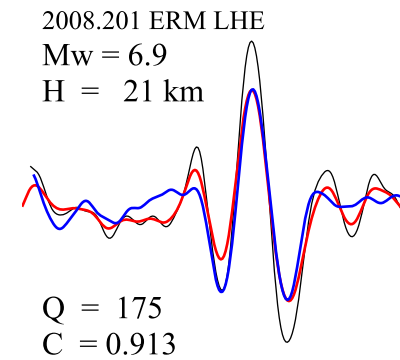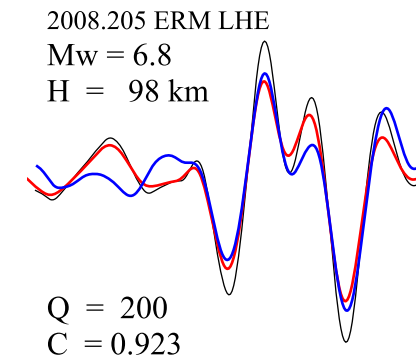

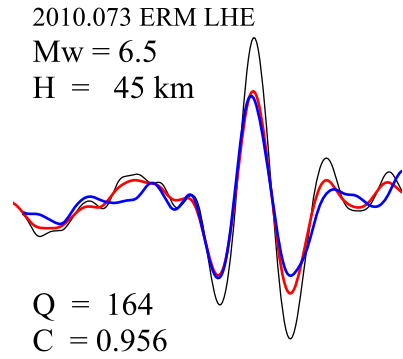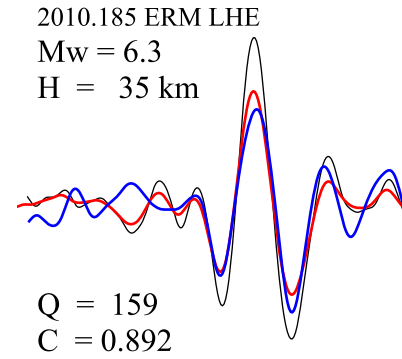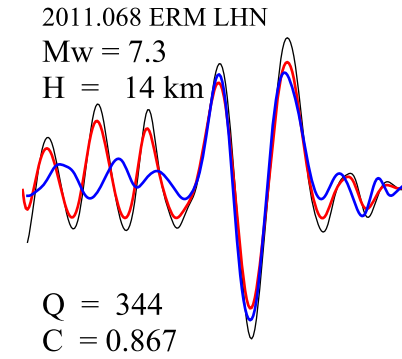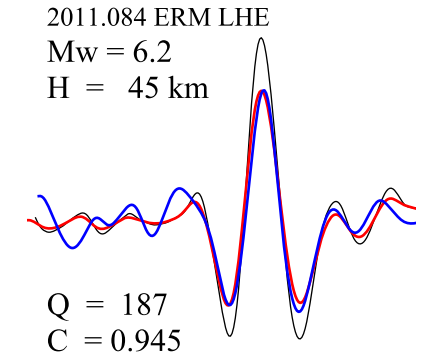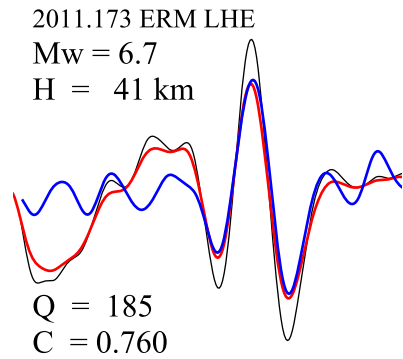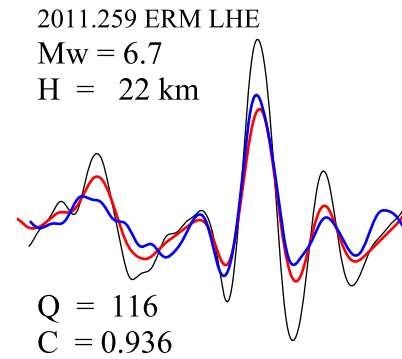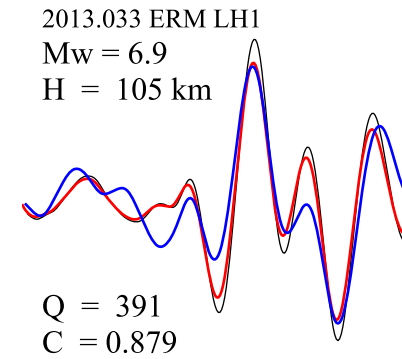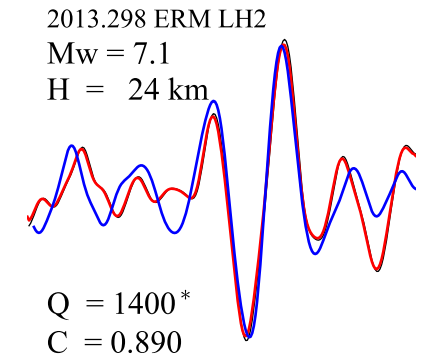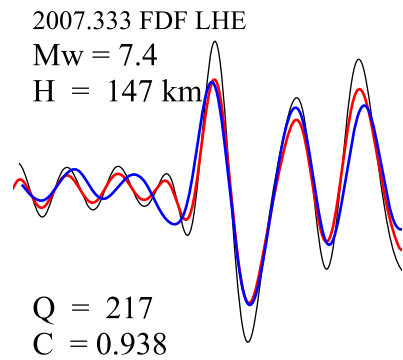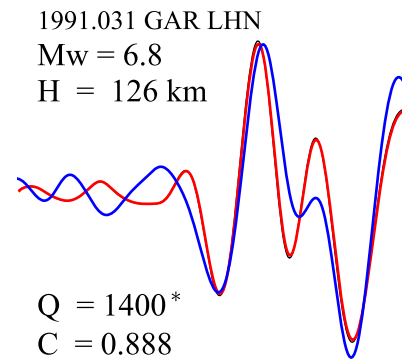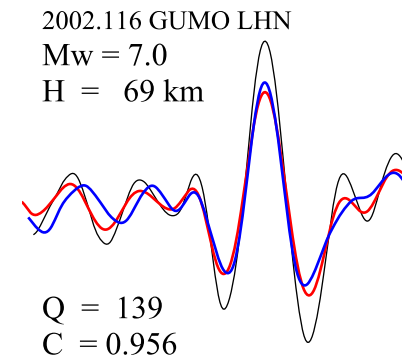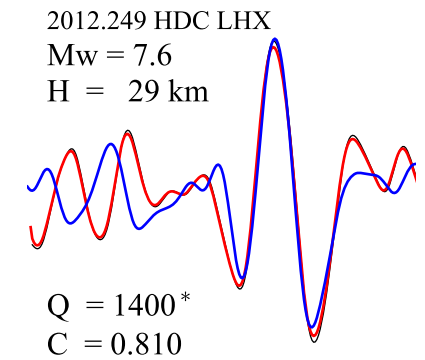

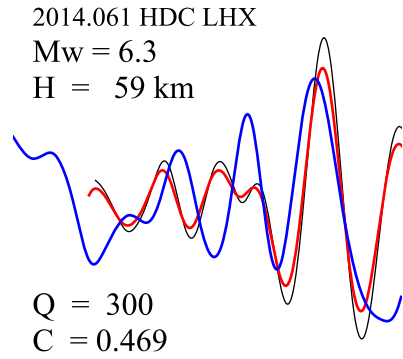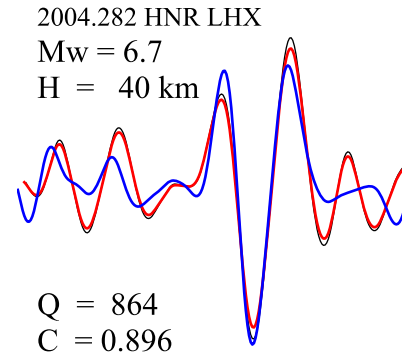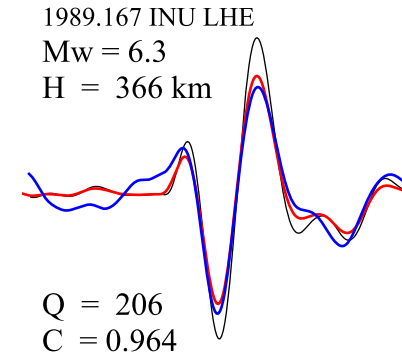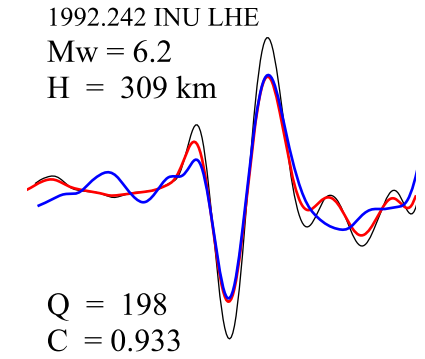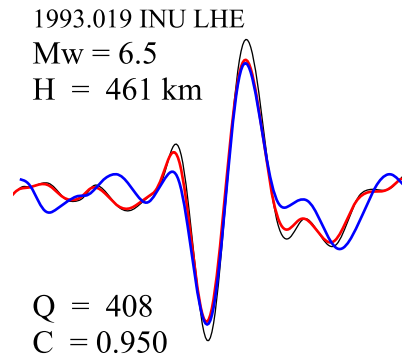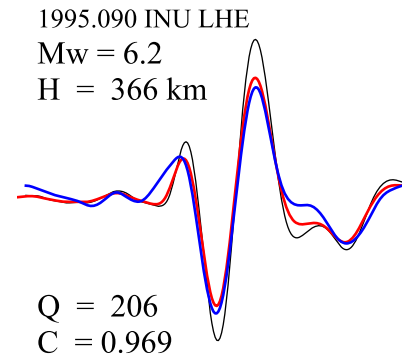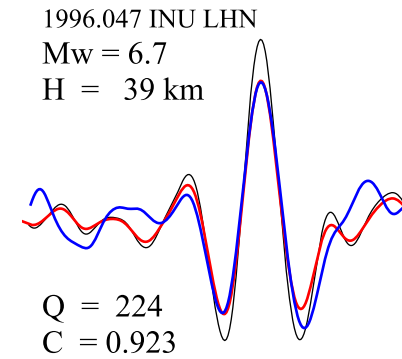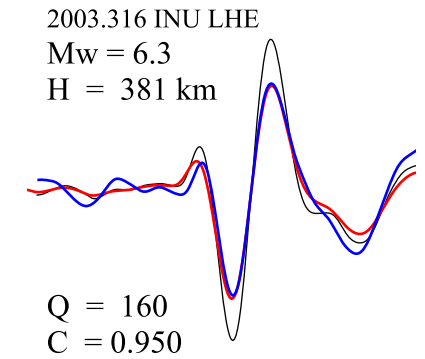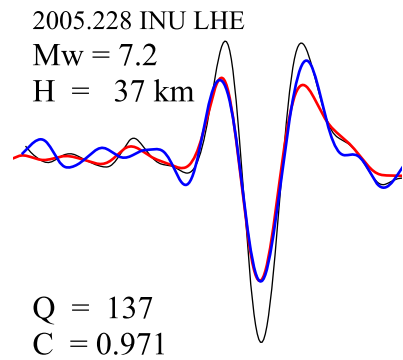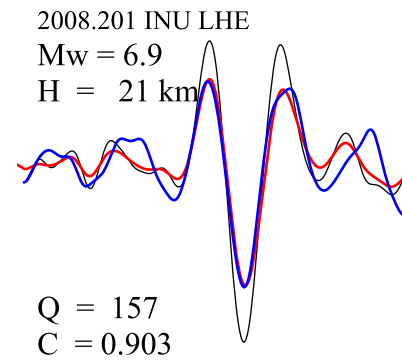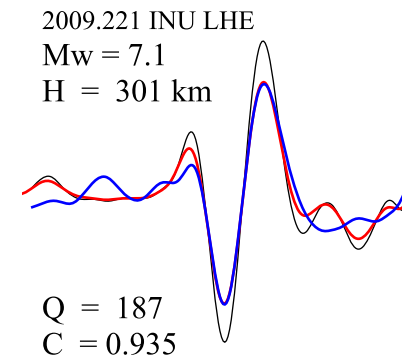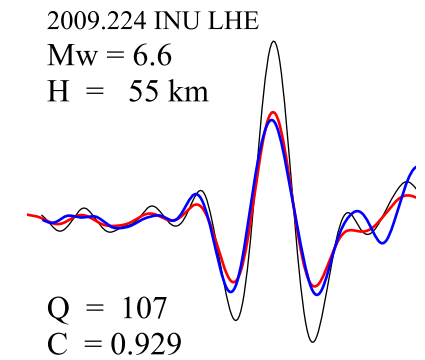

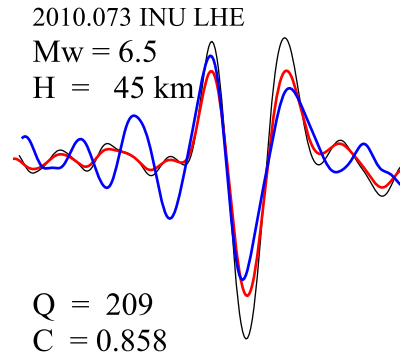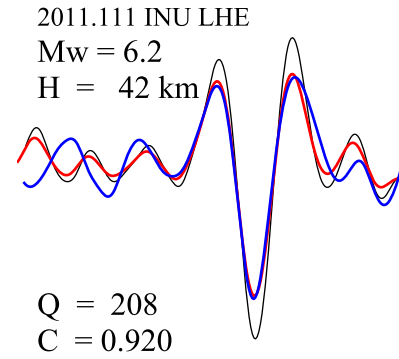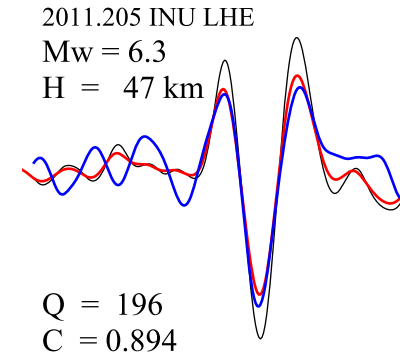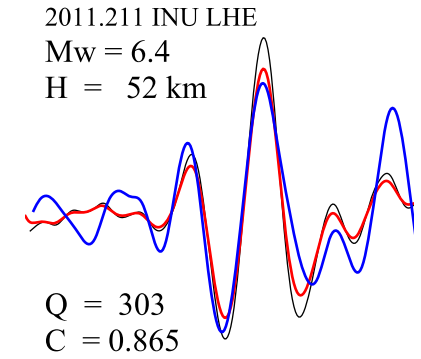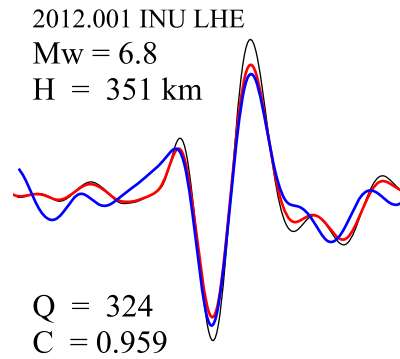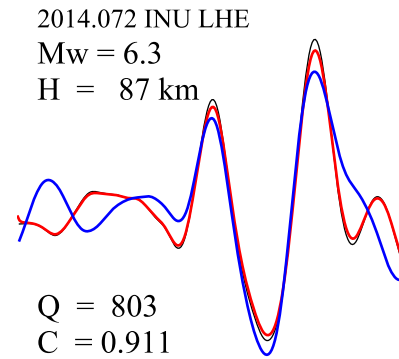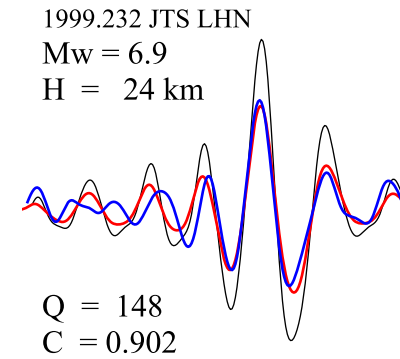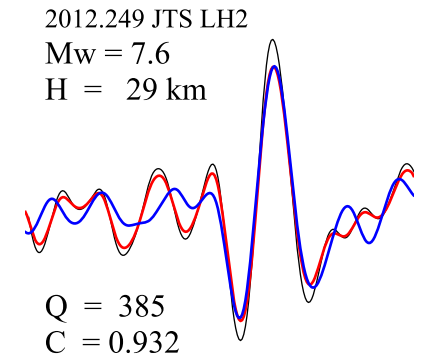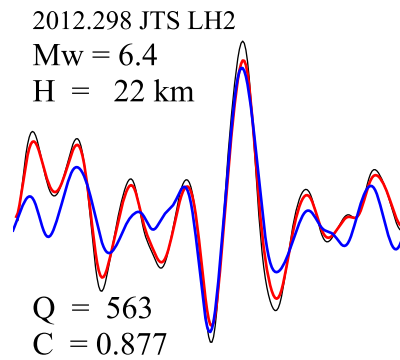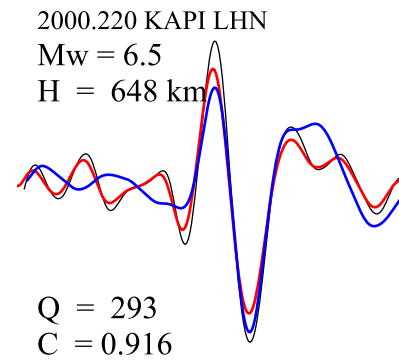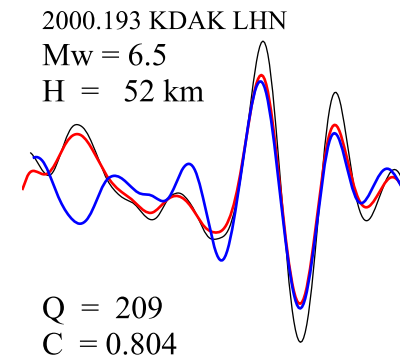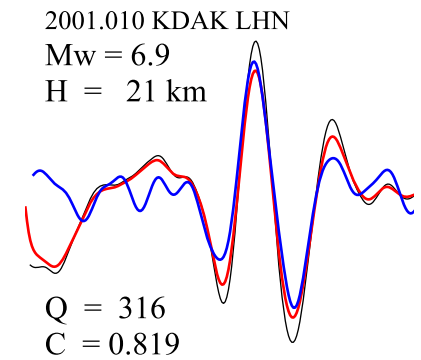

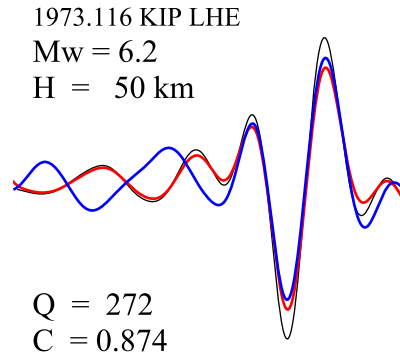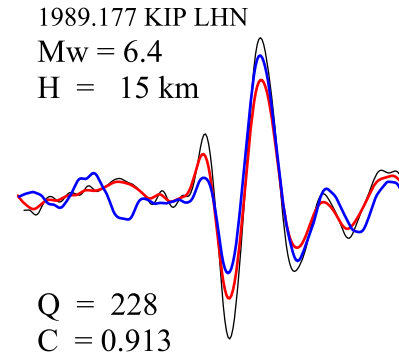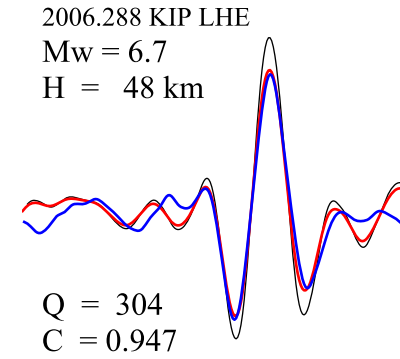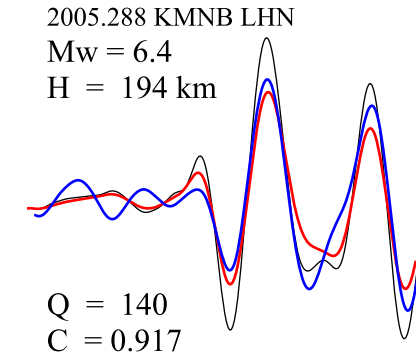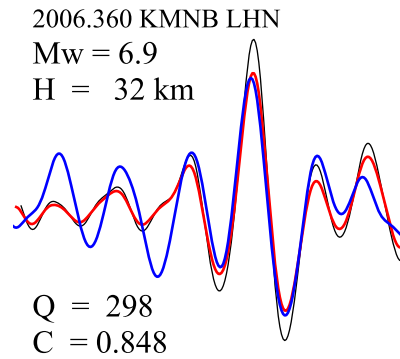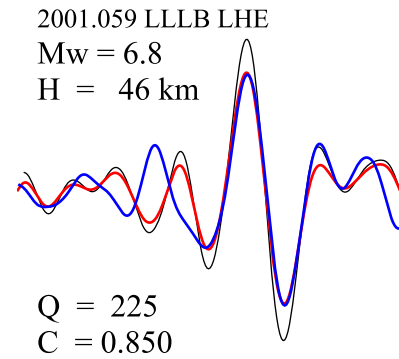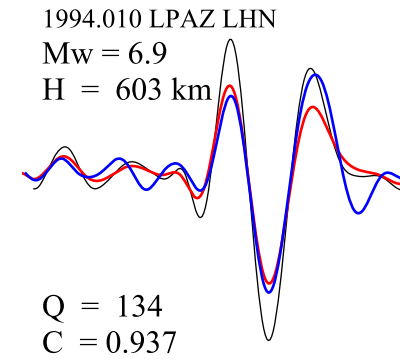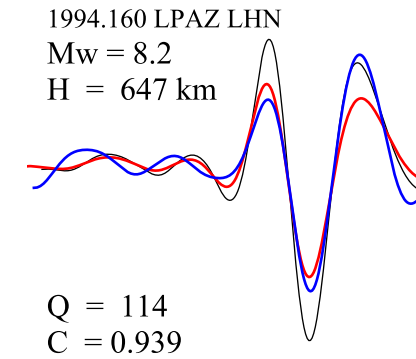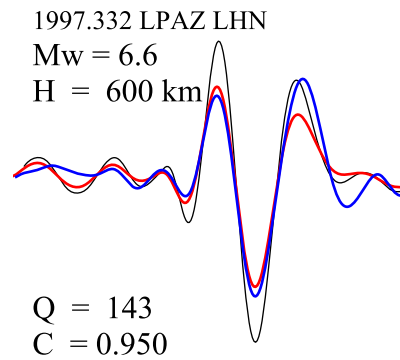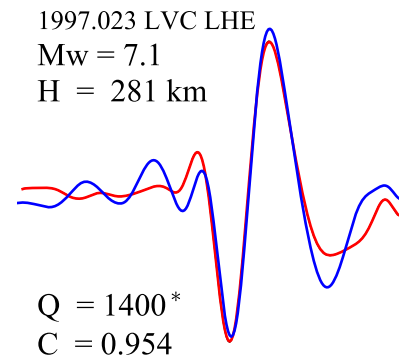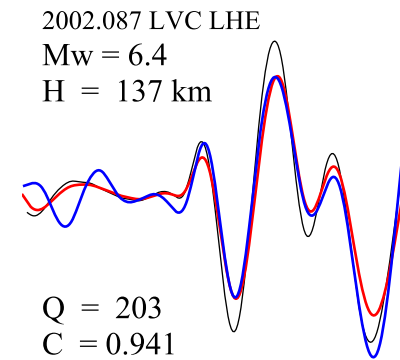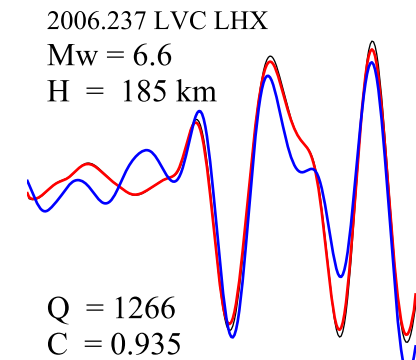

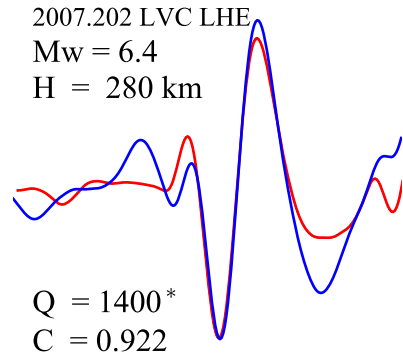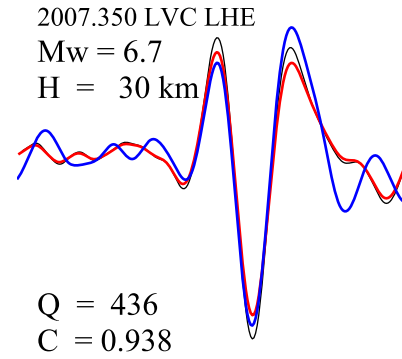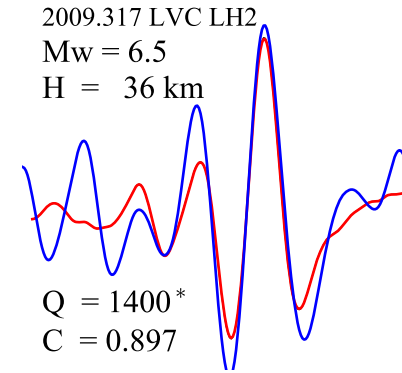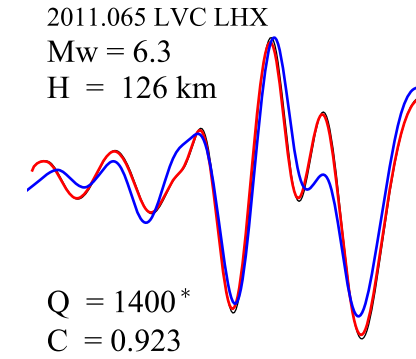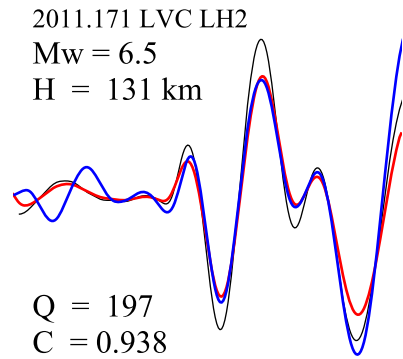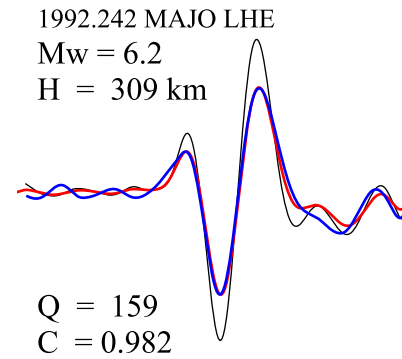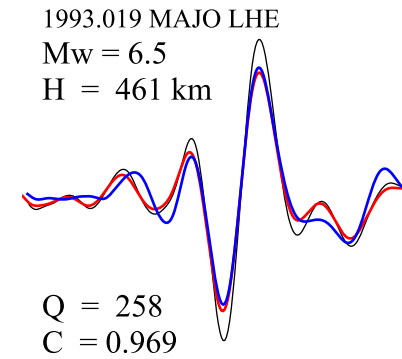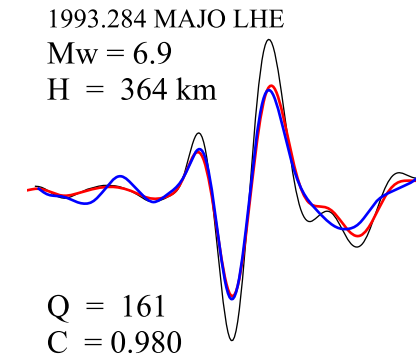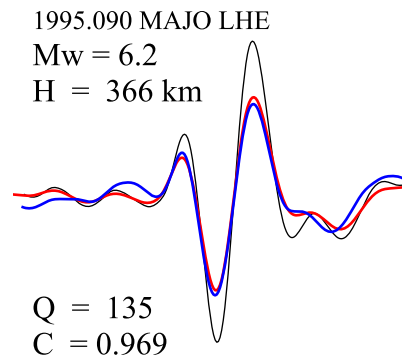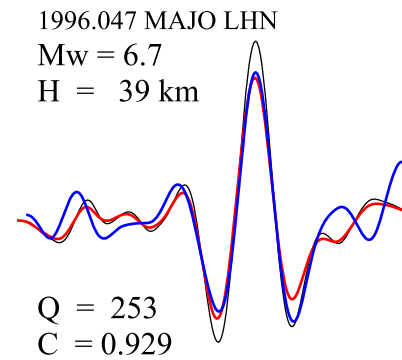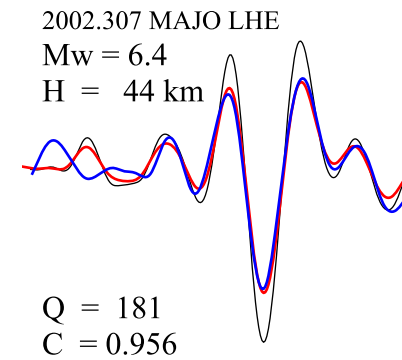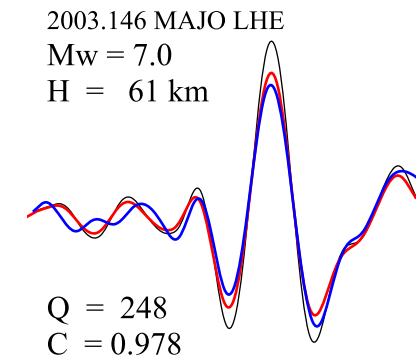

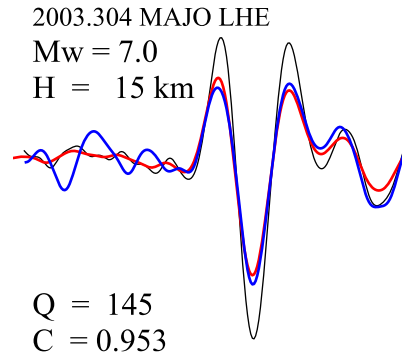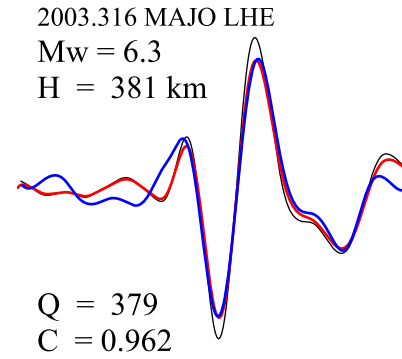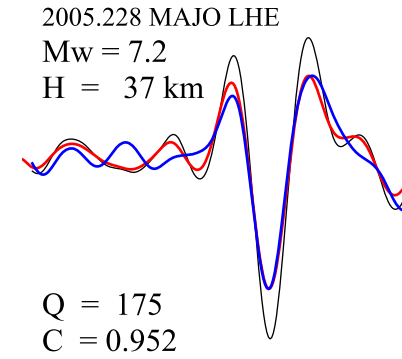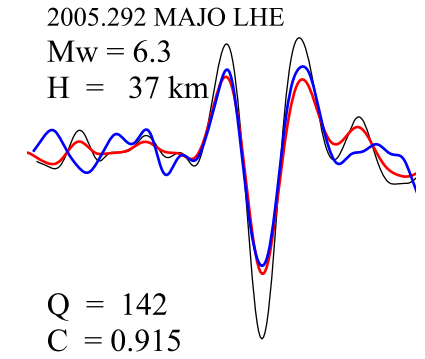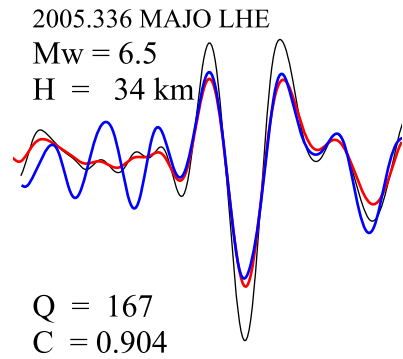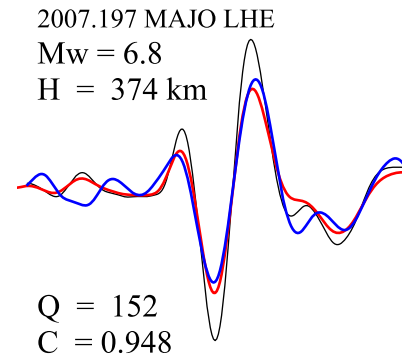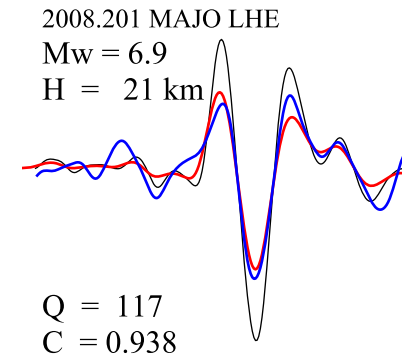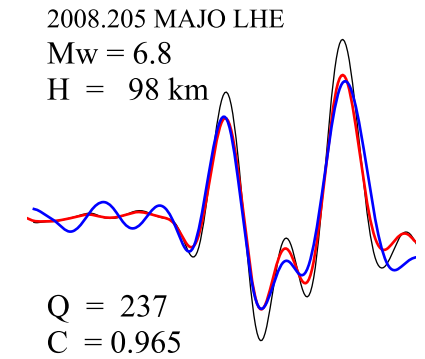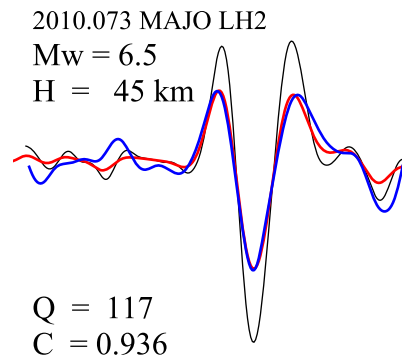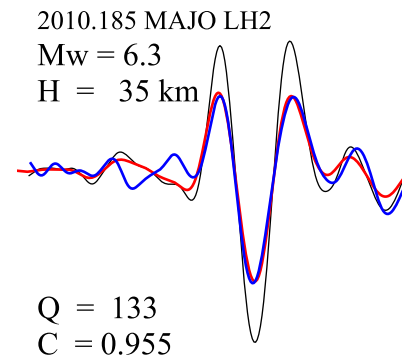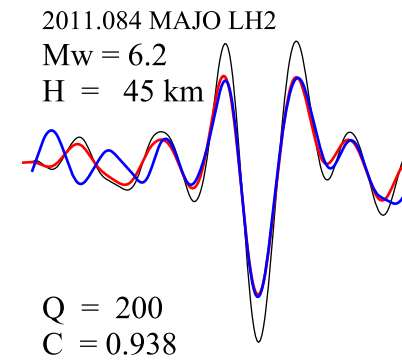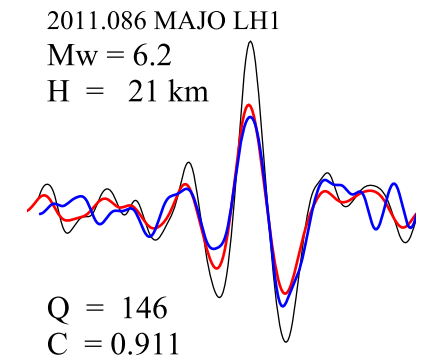



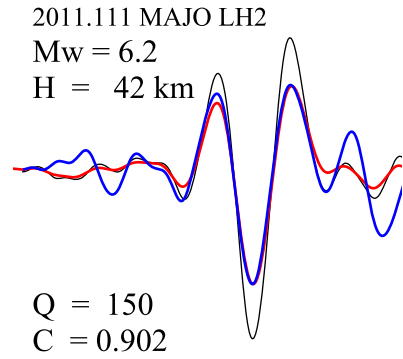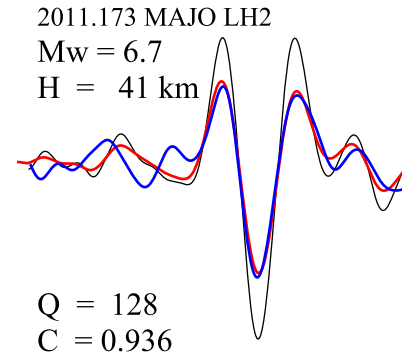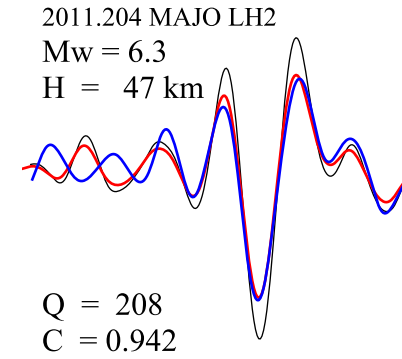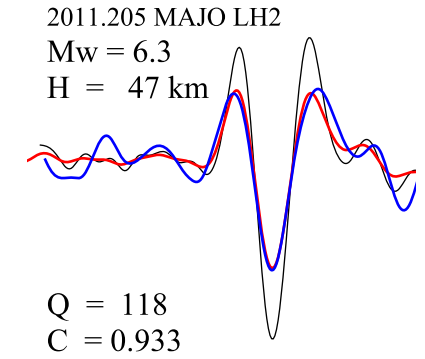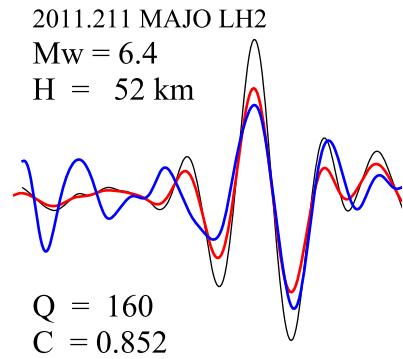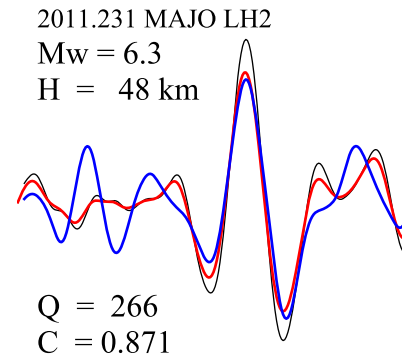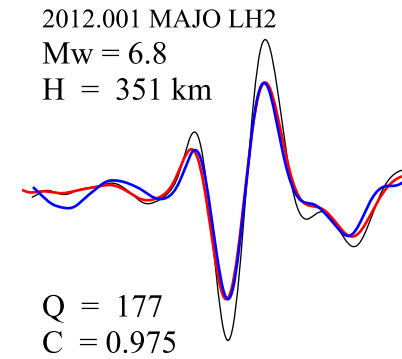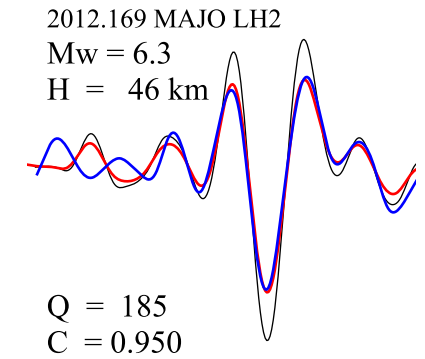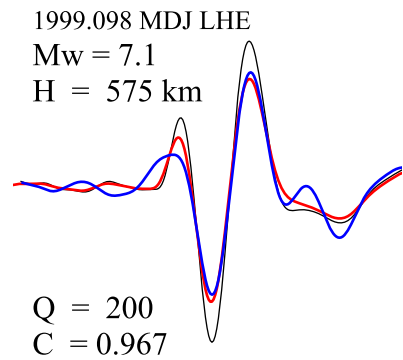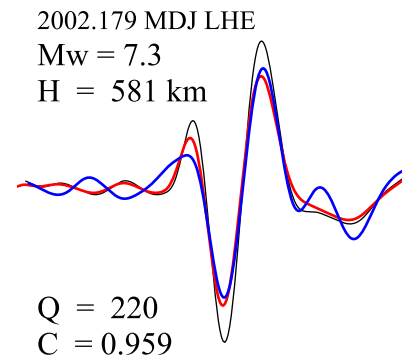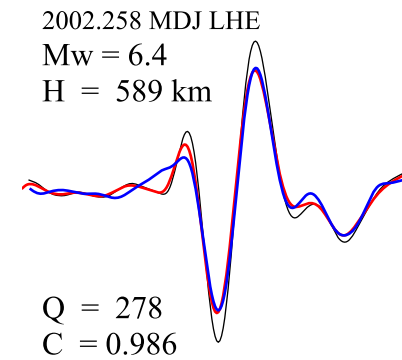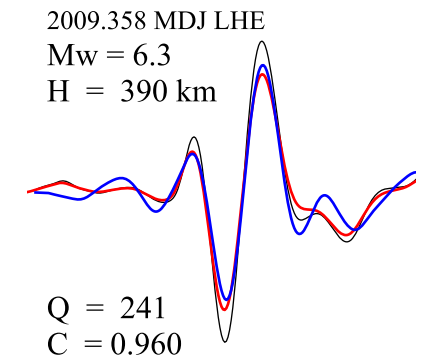

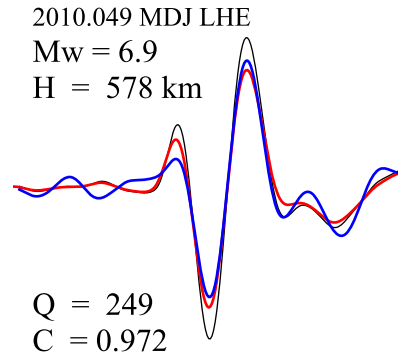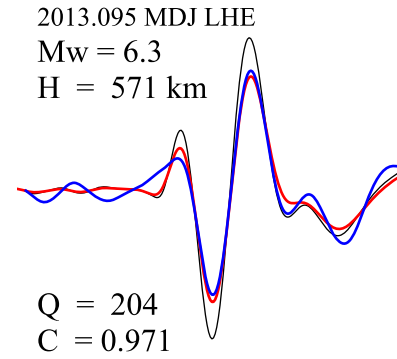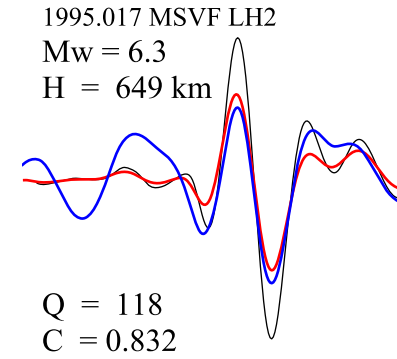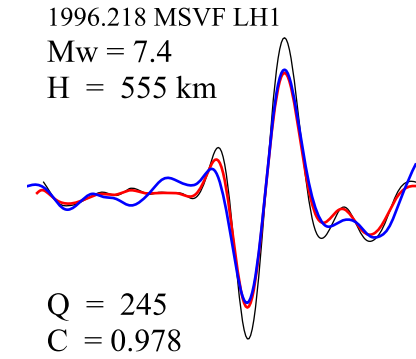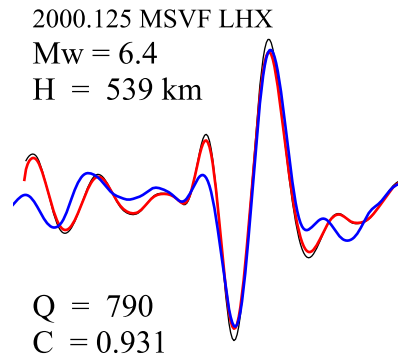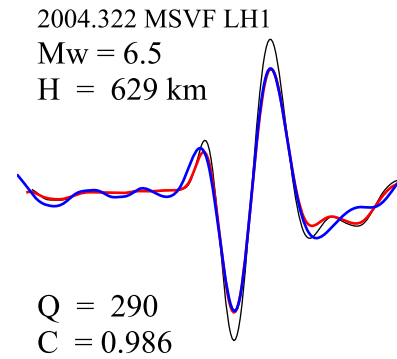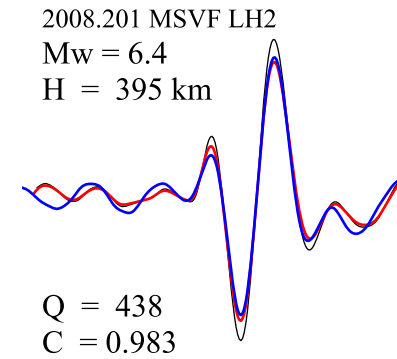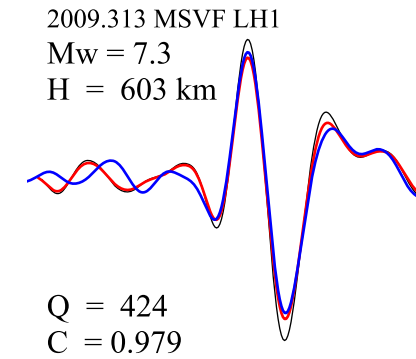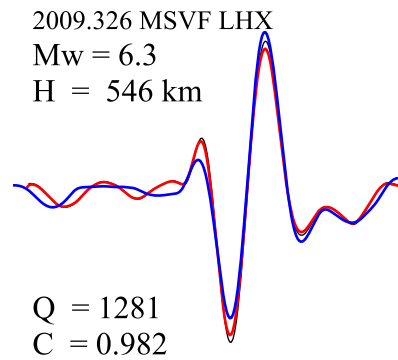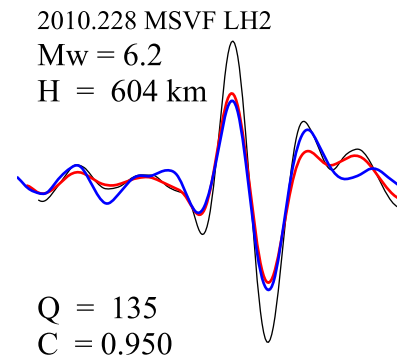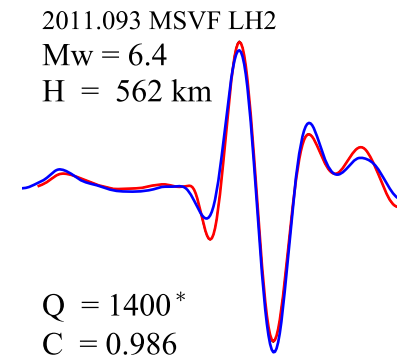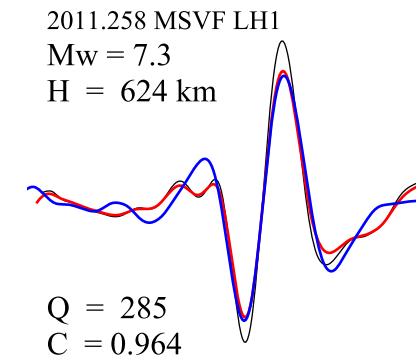

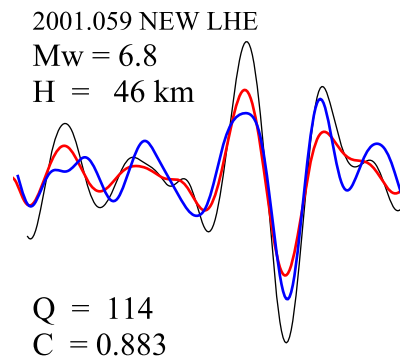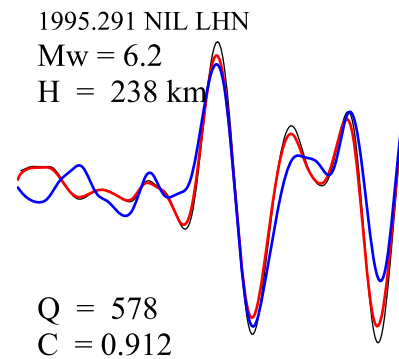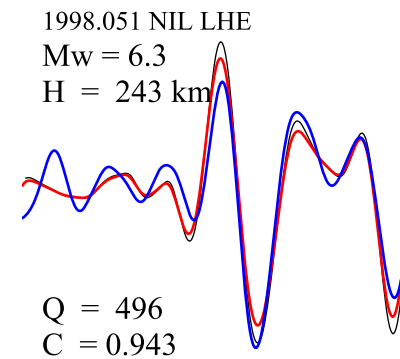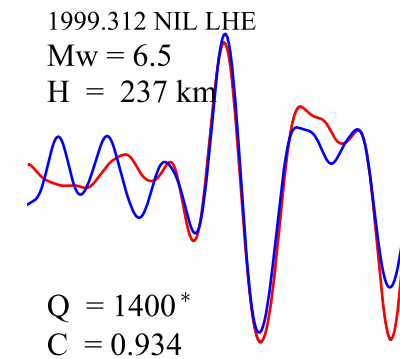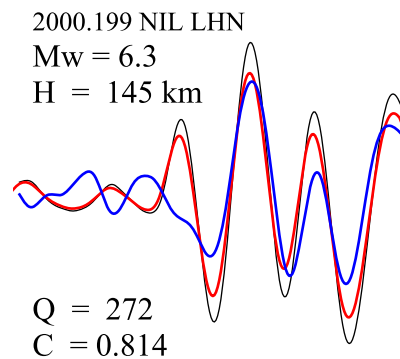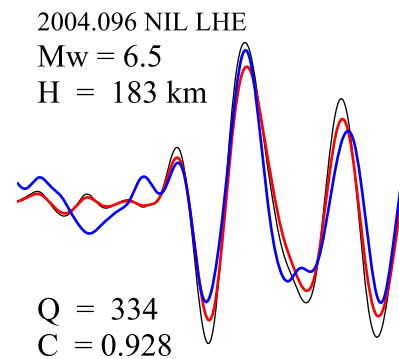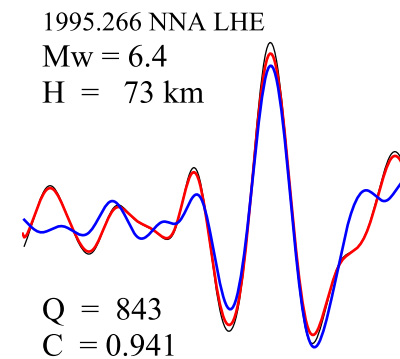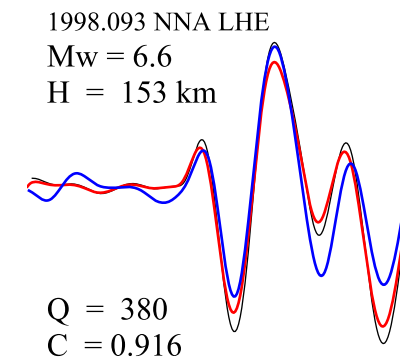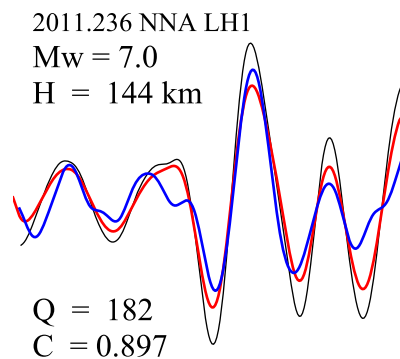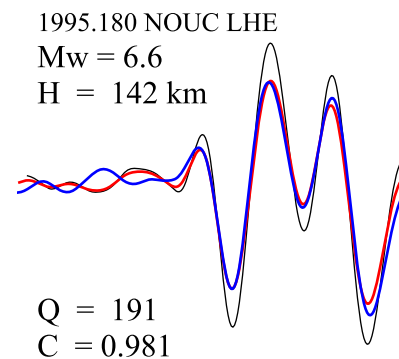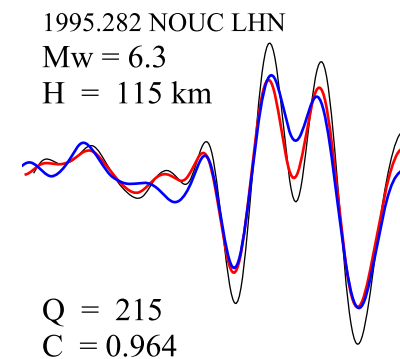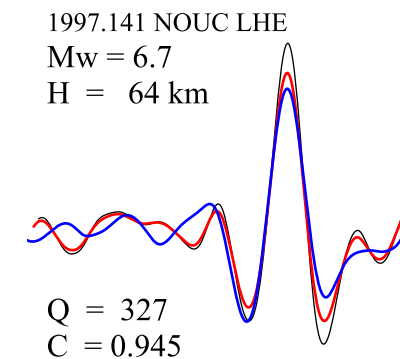

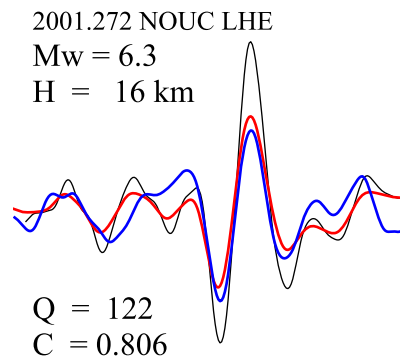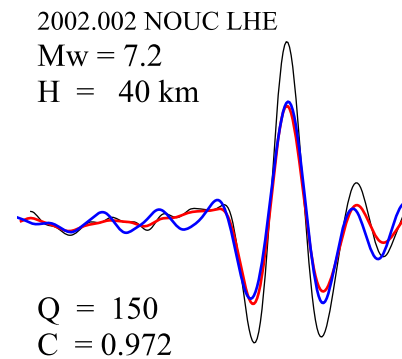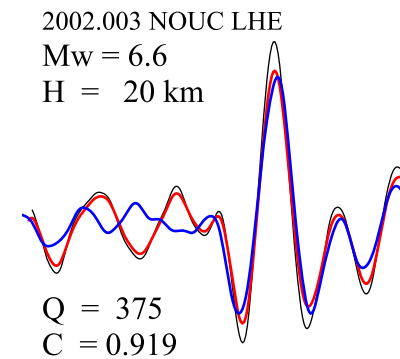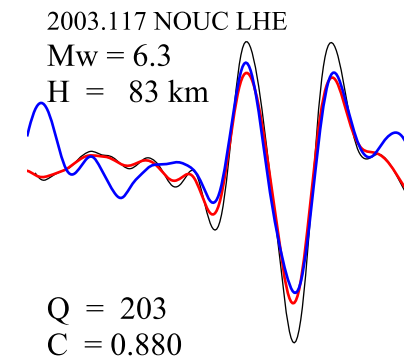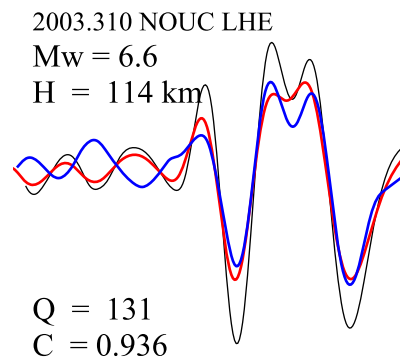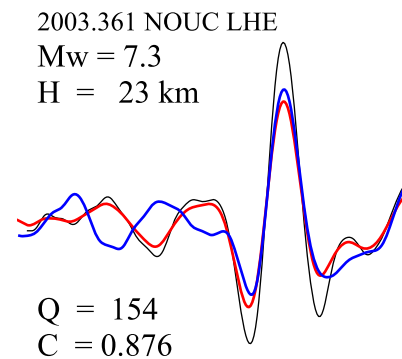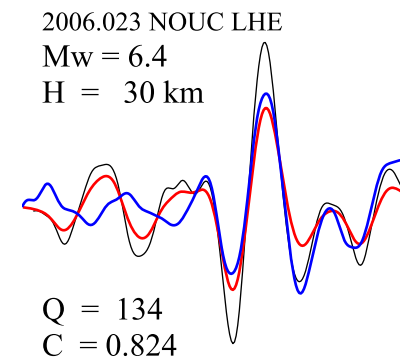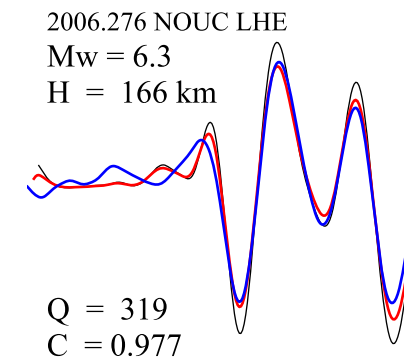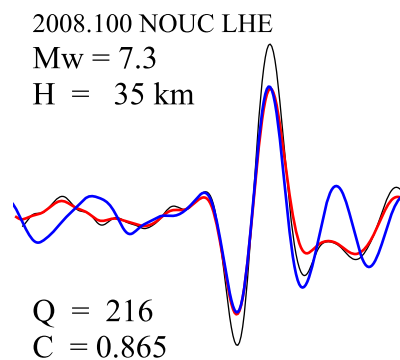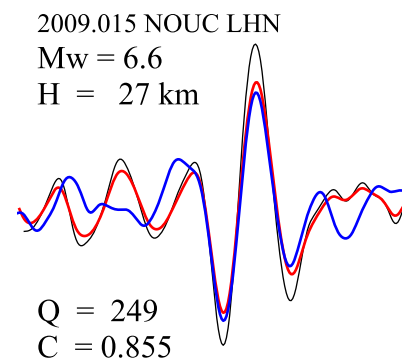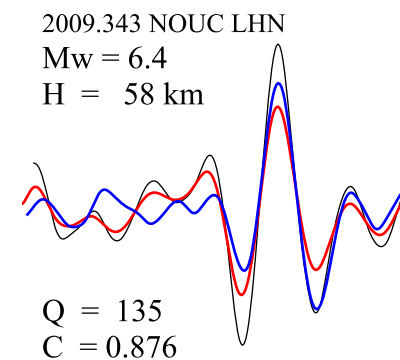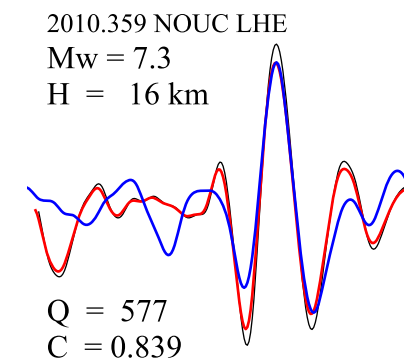

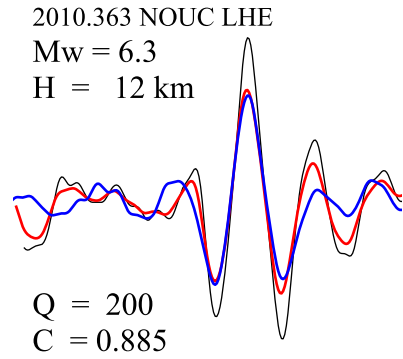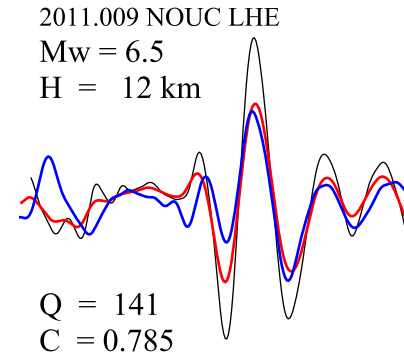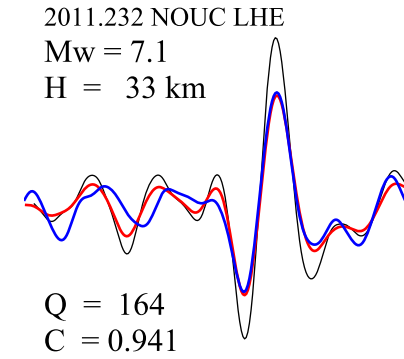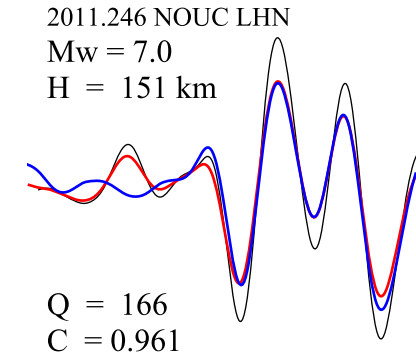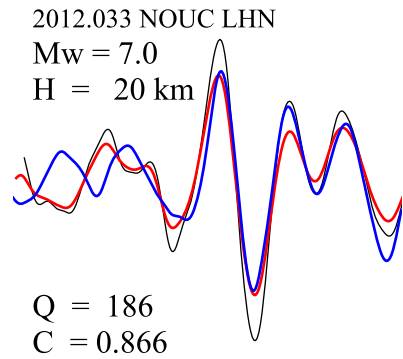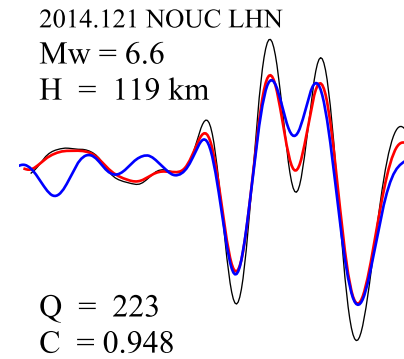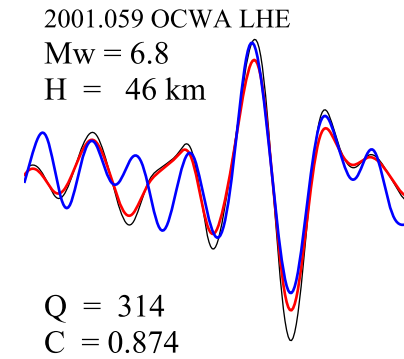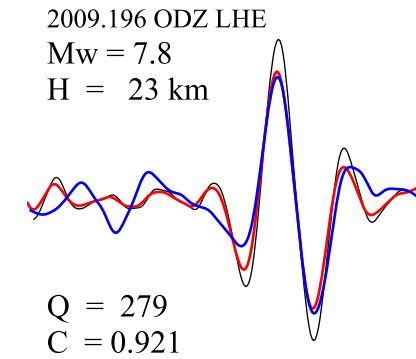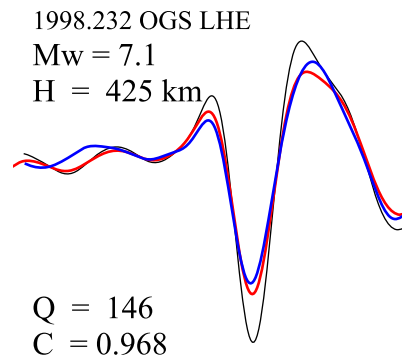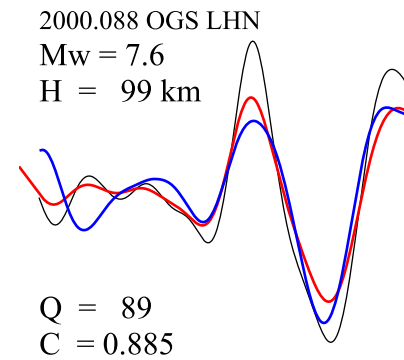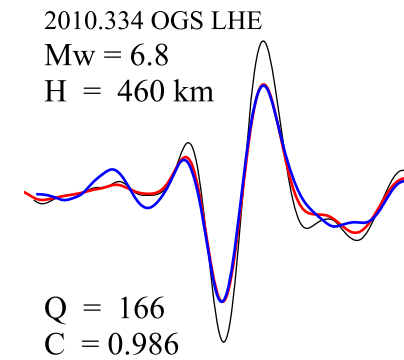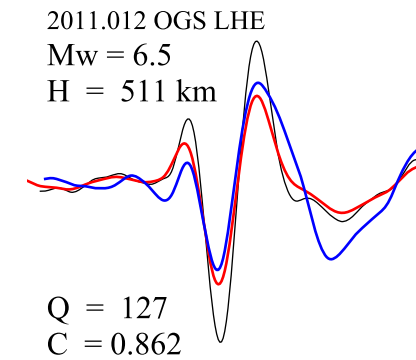

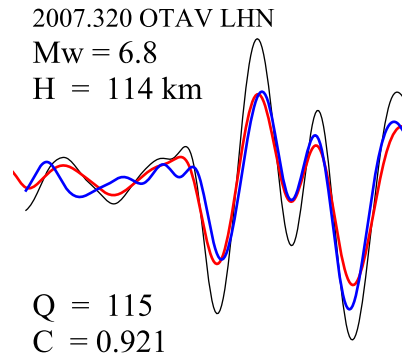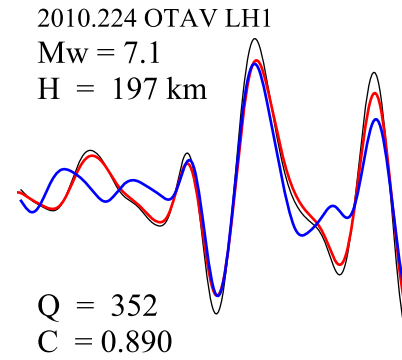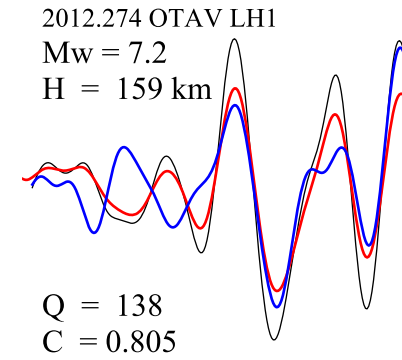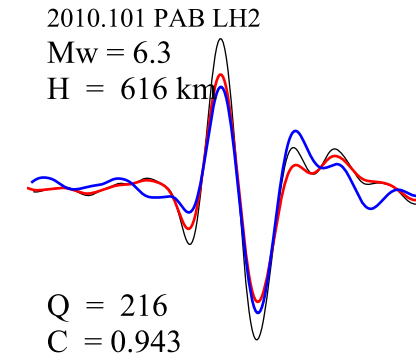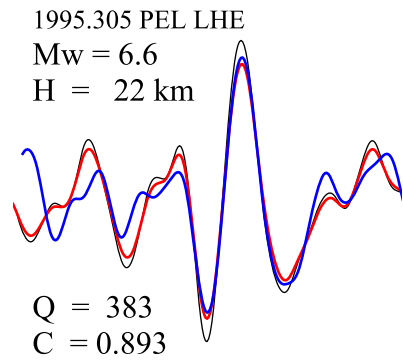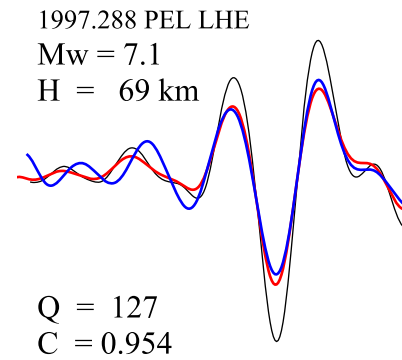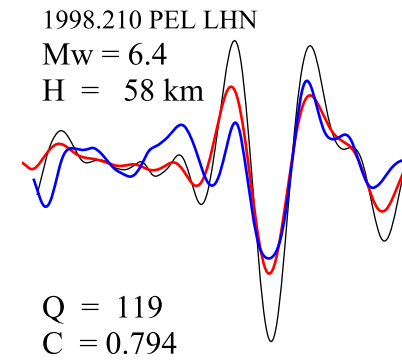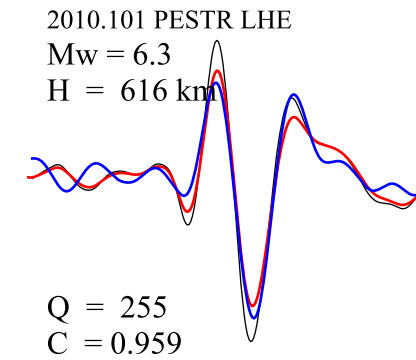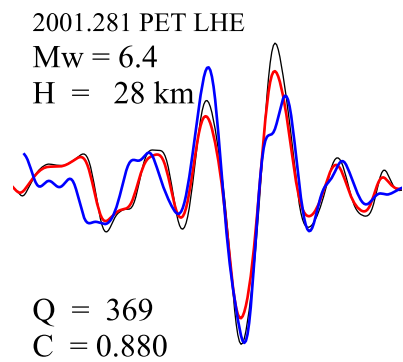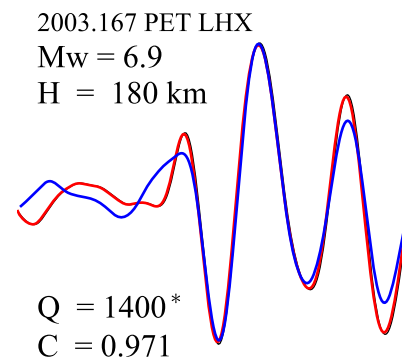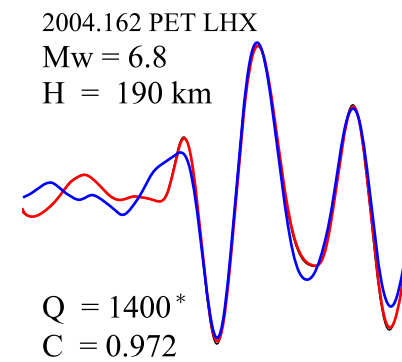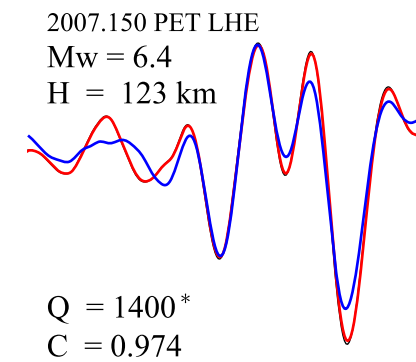

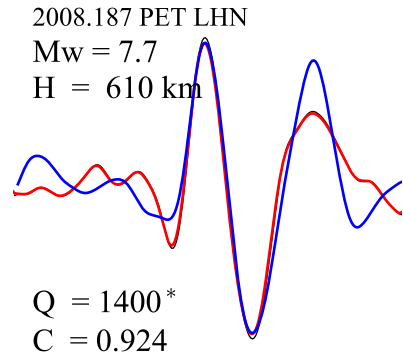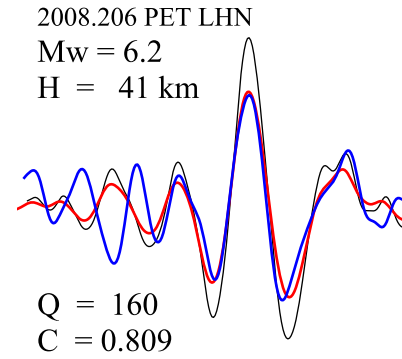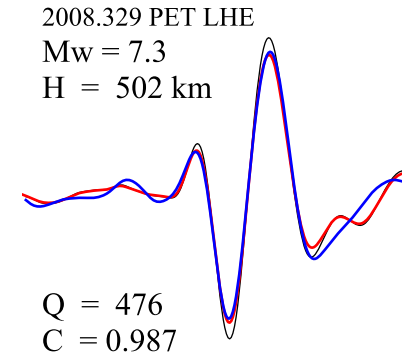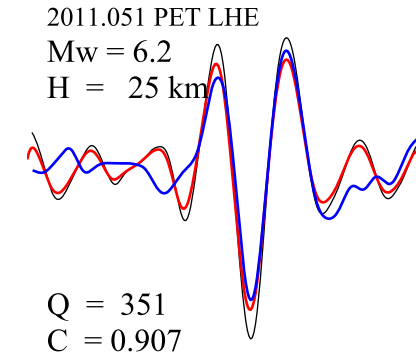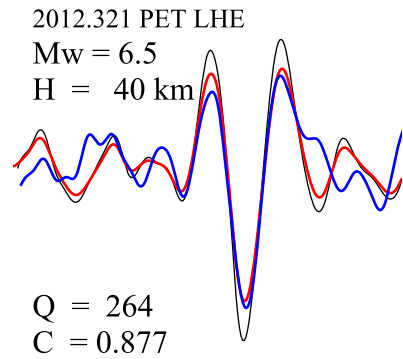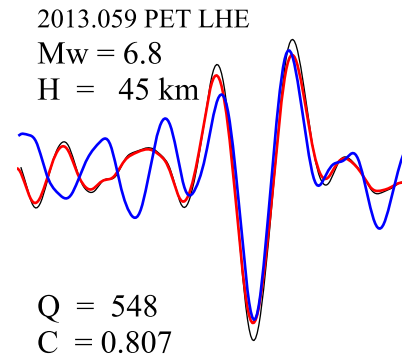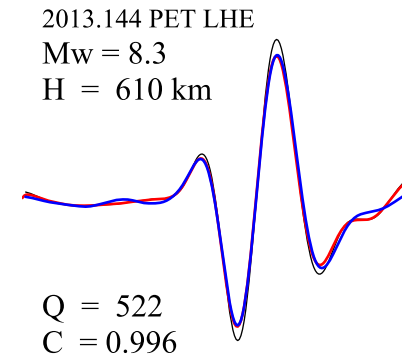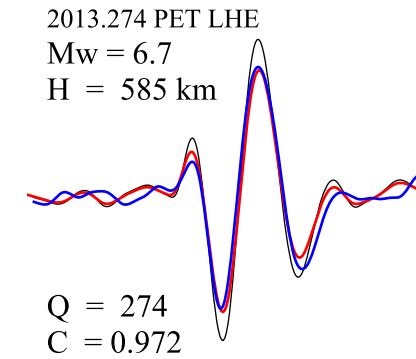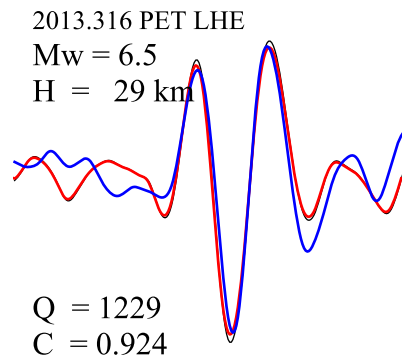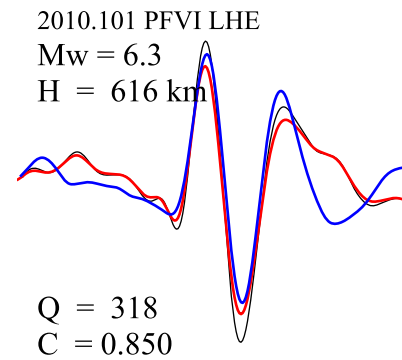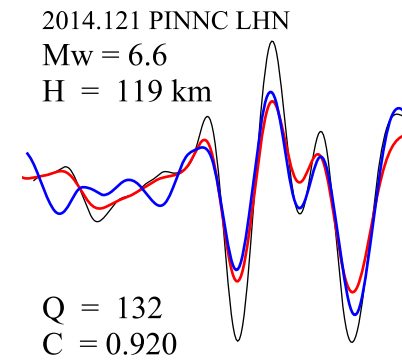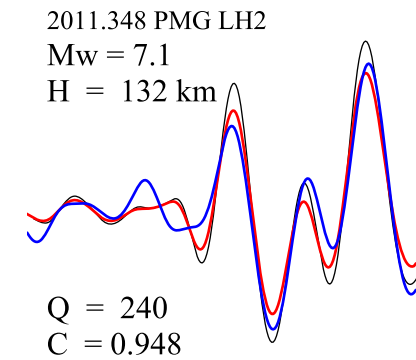

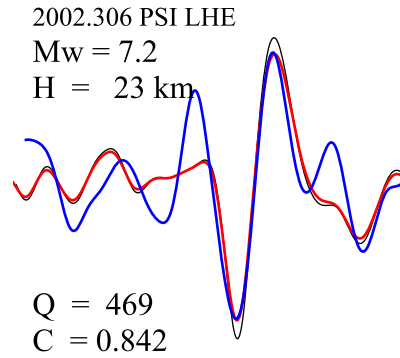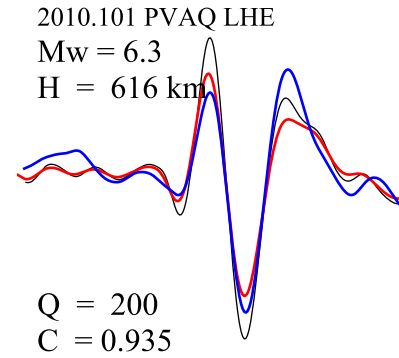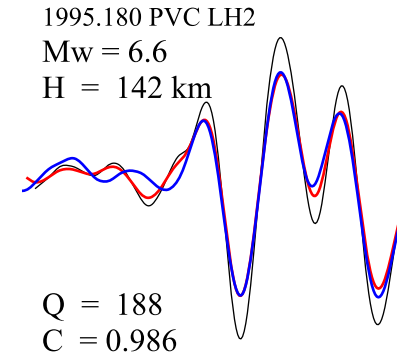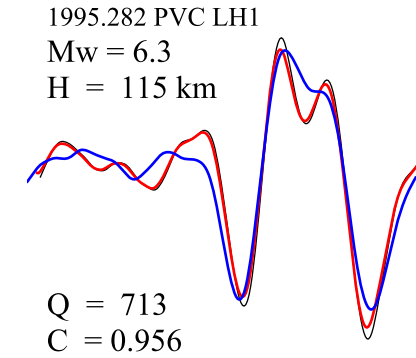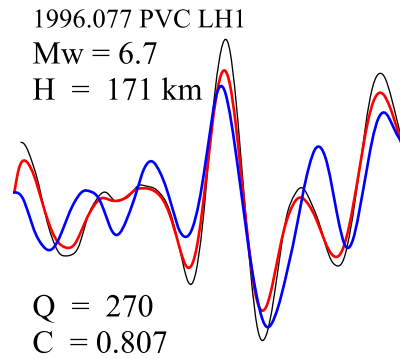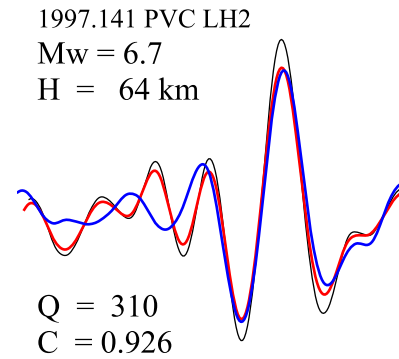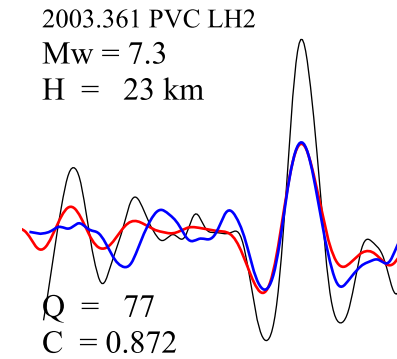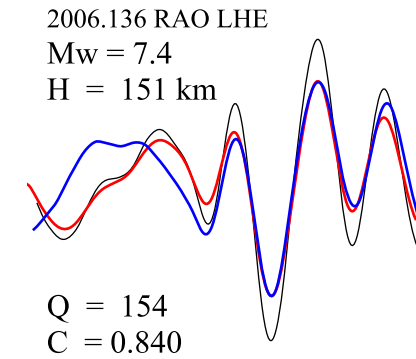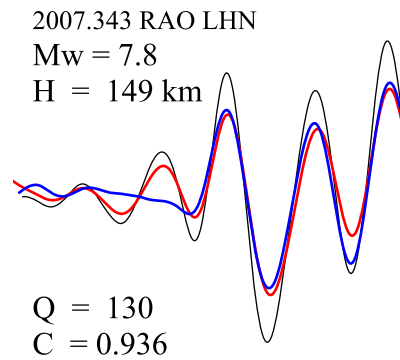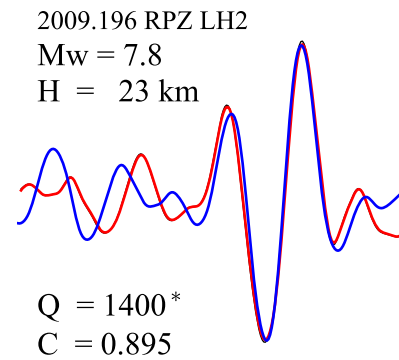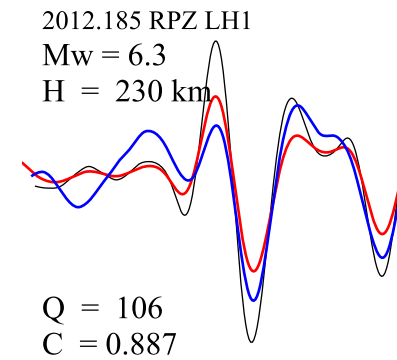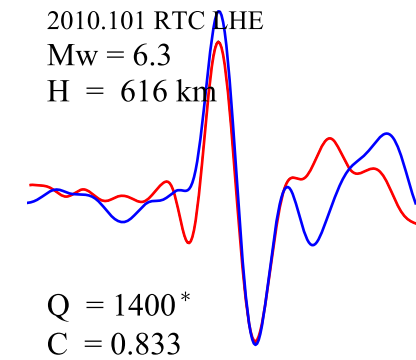



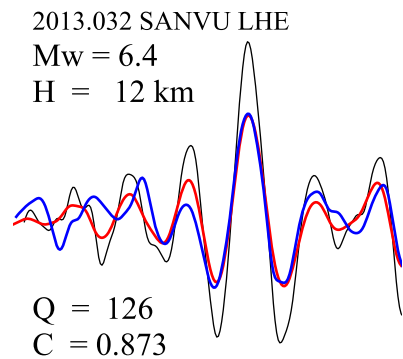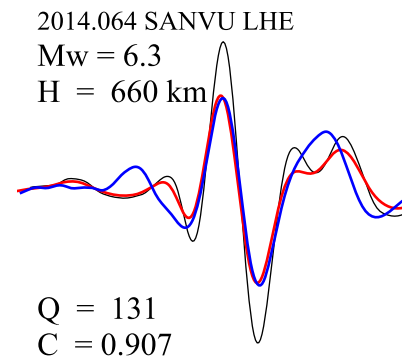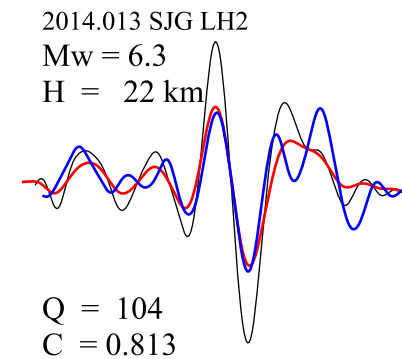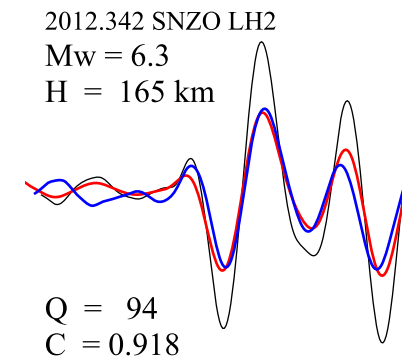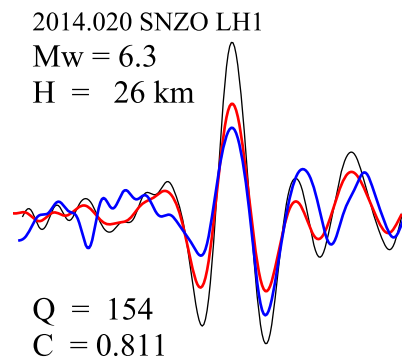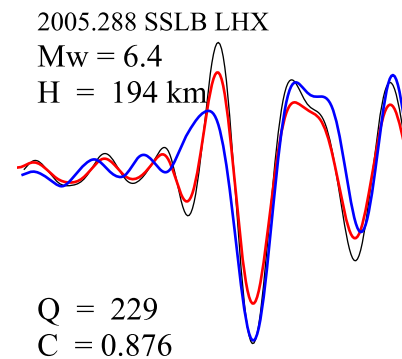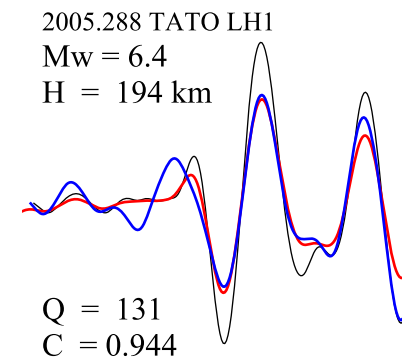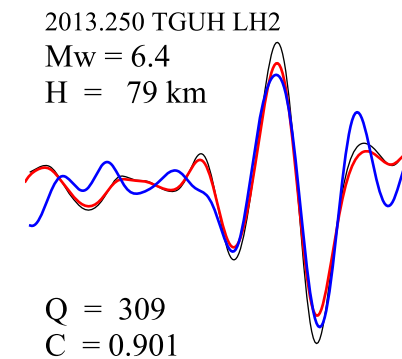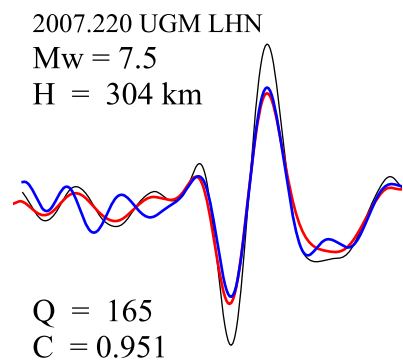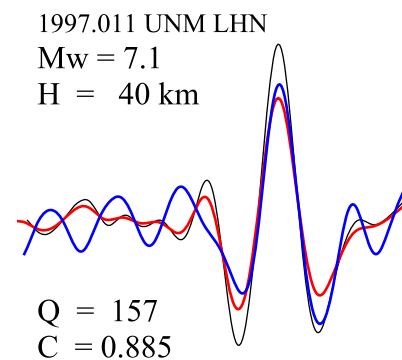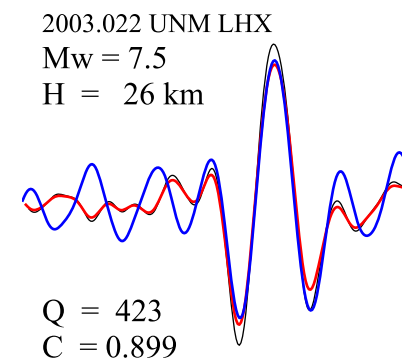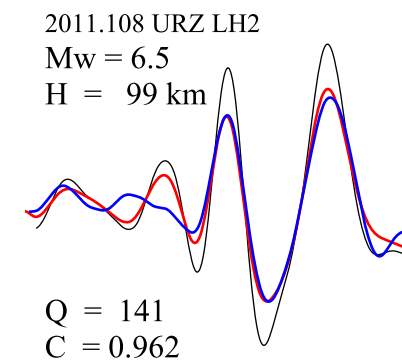

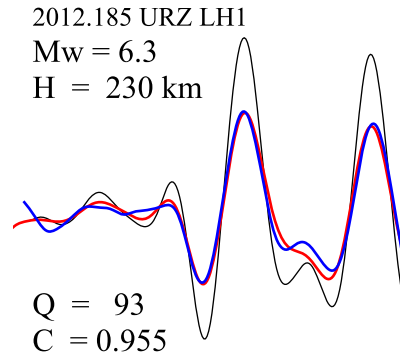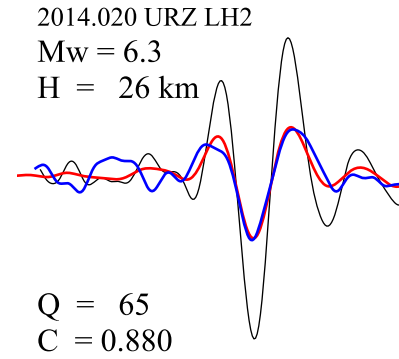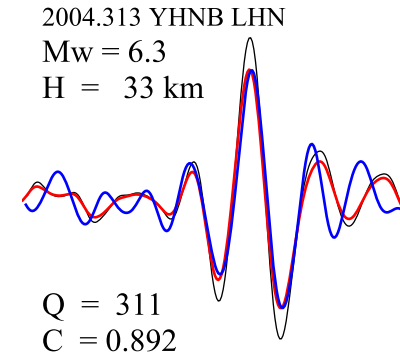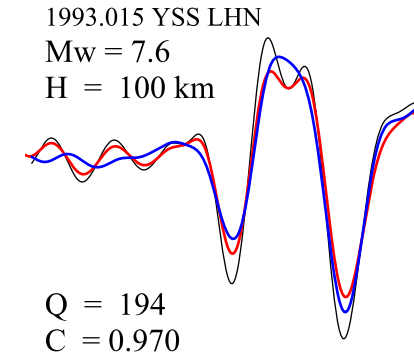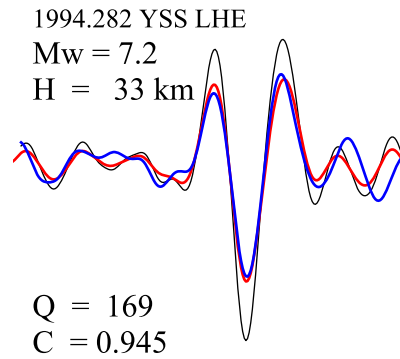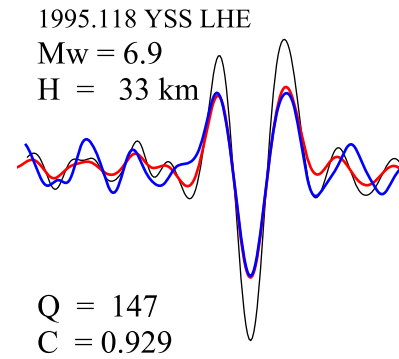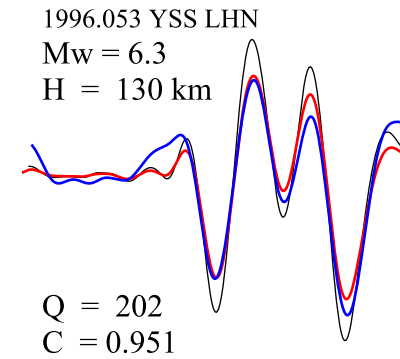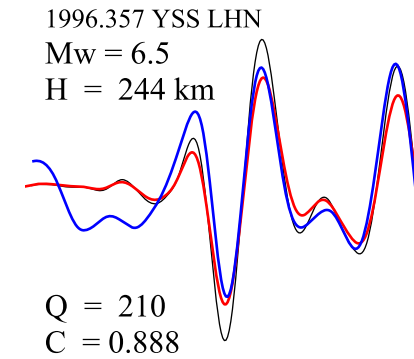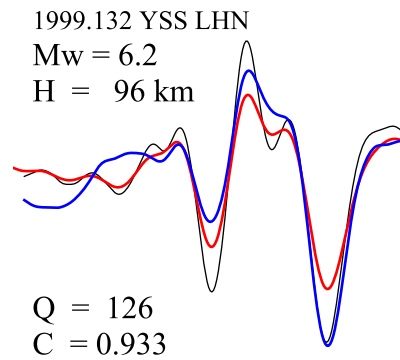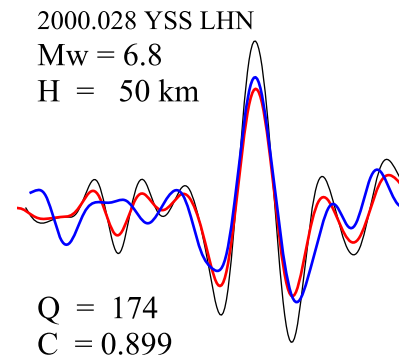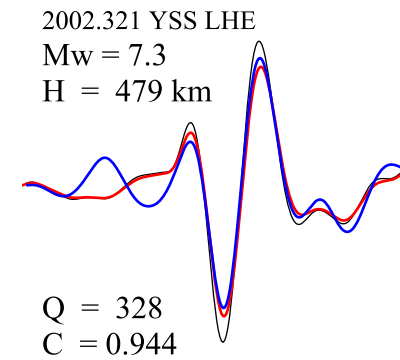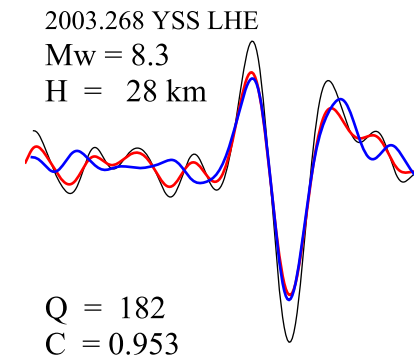

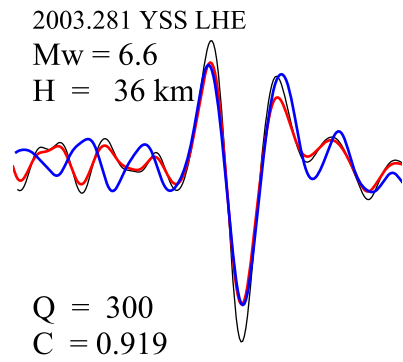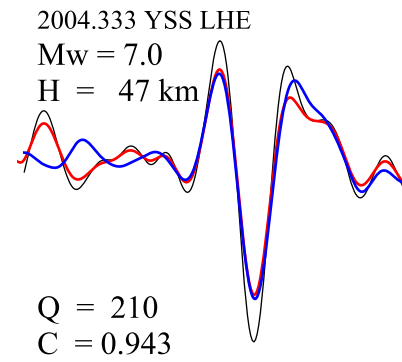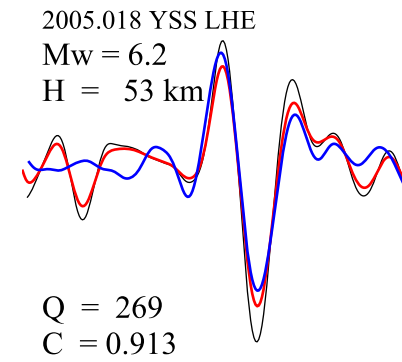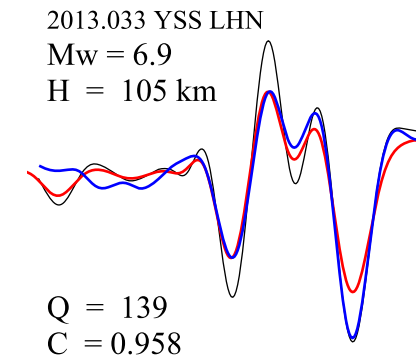

Supplement: Supplementary file 2 [file 1]
